# Supplementary material for: Infants display reduced NK cell responses in RSV and increased inflammatory responses in SARS-CoV-2 infections
Source: Research Square preprint supplement (doi:10.21203/rs.3.rs-5640872/v1), 2025-01-13
Supplement: Supplementary file 1 [file 062d1d486c4994ffd7ff83d9.xlsx]

## Sheet: Index
Sheet Name	Description
Clinical Group Legend	Legend of clinical group labels used in this table
Cell Cluster Merging	Outline of cell clusters merged for DE analyses
Summary	Summary of the number of DE genes detected for each cell type.
COVID_G2G3 vs Healthy	COVID-19 (Moderate/Severe, No steroid) vs Healthy DE genes
RSV_G1G2G3 vs Healthy	RSV (Mild/Moderate/Severe) vs Healthy DE genes
COVID_G1 vs Healthy	Subacute COVID-19 vs Healthy DE genes
COVID_G3_S vs COVID_G3	Severe COVID-19 (Steroid Treated) vs Severe COVID-19 (Untreated) DE genes
CD14+ Monocyte	DE Genes within CD14+ monocytes for all pairwise comparisons up to 25% FDR
CD16+ Monocyte	DE Genes within CD16+ monocytes for all pairwise comparisons up to 25% FDR
CD56dim NK	DE Genes within CD56dim NK cells for all pairwise comparisons up to 25% FDR
CD56bright NK	DE Genes within CD56bright NK cells for all pairwise comparisons up to 25% FDR
Naive CD8+ T	DE Genes within naive CD8+ T cells for all pairwise comparisons up to 25% FDR
GZMKhi CD8+ T	DE Genes within GZMKhi CD8+ T cells for all pairwise comparisons up to 25% FDR
MAIT	DE Genes within MAIT cells for all pairwise comparisons up to 25% FDR
CD8- γδ T	DE Genes within CD8- γδ T cells Monocytes for all pairwise comparisons up to 25% FDR
CD8+ γδ T	DE Genes within CD8+ γδ T cells Monocytes for all pairwise comparisons up to 25% FDR
Naive CD4+ T	DE Genes within naive CD4+ T cells for all pairwise comparisons up to 25% FDR
CD4+ TCM	DE Genes within CD4+ TCM cells for all pairwise comparisons up to 25% FDR
Merged Memory CD4+ T	DE Genes within merged memory CD4+ T cells for all pairwise comparisons up to 25% FDR
Naive Treg	DE Genes within naive tregs for all pairwise comparisons up to 25% FDR
Naive B	DE Genes within naive B cells for all pairwise comparisons up to 25% FDR
TrB	DE Genes within transitional B cells for all pairwise comparisons up to 25% FDR
Memory B	DE Genes within memory B cells for all pairwise comparisons up to 25% FDR

## Sheet: Clinical Group Legend
Clinical Group	Description
COVID_G1	Subacute COVID-19
COVID_G2	Moderate COVID-19
COVID_G3	Severe COVID-19
COVID_G3_S	Severe T COVID-19 (Steroid Treated)
RSV_G1	Mild RSV
RSV_G2	Moderate RSV
RSV_G3	Severe RSV
COVID_G2G3	Moderate+Severe COVID-19 (No Steroid Treatment)
RSV_G1G2G3	Mild+Moderate+Severe RSV
CD14+	Monocyte

## Sheet: Cell Cluster Merging
Merged Cluster Used in DE Analysis	Original Cluster
CD14+ Monocyte	ISGlo CD14+ Monocyte
CD14+ Monocyte	ISGhi CD14+ Monocyte
CD14+ Monocyte	ISGhi CD163+ Monocyte
CD16+ Monocyte	ISGlo CD16+ Monocyte
CD16+ Monocyte	ISGhi CD16+ Monocyte
DC	Mo-DC
DC	cDC1
DC	cDC2
pDC	pDC
CD56dim NK	CD56dim NK
CD56bright NK	CD56bright NK
Proliferating NK	Proliferating NK
Naive CD8+ T	ISGlo Naive CD8+ T
Naive CD8+ T	ISGhi CD8+ T
GZMKhi CD8+ T	GZMKhi CD8+ T
CD8+ TEMRA	CD8+ TEMRA
MAIT	MAIT
CD8- γδ T	CD8- γδ T
CD8+ γδ T	CD8+ γδ T
Proliferating T	Proliferating T
Naive CD4+ T	ISGlo Naive CD4+ T
Naive CD4+ T	ISGhi CD4+ T
CD4+ TCM	CD4+ TCM
Merged CD4+ Memory T	CD4+ TEMRA
Merged CD4+ Memory T	ISGlo Tfh
Merged CD4+ Memory T	ISGhi Tfh
Merged CD4+ Memory T	Th1
Merged CD4+ Memory T	Th2
Merged CD4+ Memory T	Th17
Merged CD4+ Memory T	Th22
Naive Treg	ISGlo Naive Treg
Naive Treg	ISGhi Treg
Memory Treg	Memory Treg
Naive B	ISGlo Naive B
Naive B	ISGhi B
Naive B	FKBP5hi B
TrB	ISGlo TrB
TrB	ISGhi TrB
Memory B	Memory B
AIM2hi Memory B	AIM2hi Memory B
DN2 B	DN2 B
Plasmablast	Plasmablast
Erythroblast	Erythroblast
HSPC	HSPC
ILC2	ILC2
MGK	MGK
Cycling T	Cycling T

## Sheet: Summary
Cell Lineage	Annotation	DE Direction	Main Healthy Comparisons: # DE Genes			RSV vs COVID Comparison: # DE Genes	Steroid Treatment Comparison: #DE Genes	Other Pairwise Comparisons: # DE Genes
			COVID_G2G3 vs Healthy	RSV_G1G2G3 vs Healthy	COVID_G1 vs Healthy	RSV_G1G2G3 vs COVID_G2G3	COVID_G3_S vs COVID_G3	COVID_G2 vs COVID_G1	COVID_G3_S vs COVID_G1	COVID_G3 vs COVID_G1	RSV_G1 vs COVID_G1	RSV_G2 vs COVID_G1	RSV_G3 vs COVID_G1	COVID_G3_S vs COVID_G2	COVID_G3 vs COVID_G2	RSV_G1 vs COVID_G2	RSV_G2 vs COVID_G2	RSV_G3 vs COVID_G2	RSV_G1 vs COVID_G3_S	RSV_G2 vs COVID_G3_S	RSV_G3 vs COVID_G3_S	RSV_G1 vs COVID_G3	RSV_G2 vs COVID_G3	RSV_G3 vs COVID_G3	COVID_G2 vs Healthy	COVID_G3_S vs Healthy	COVID_G3 vs Healthy	RSV_G1 vs Healthy	RSV_G2 vs Healthy	RSV_G3 vs Healthy	RSV_G2 vs RSV_G1	RSV_G3 vs RSV_G1	RSV_G3 vs RSV_G2
Myeloid	CD14+ Monocyte	Upregulated	453	427	0	0	96	241	207	0	0	0	0	212	0	0	3	0	146	124	109	1	0	0	490	469	243	113	359	312	0	0	0
		Downregulated	347	217	0	0	89	155	154	0	0	0	0	203	0	0	1	0	139	118	155	0	0	0	390	418	188	76	222	205	0	0	0
	CD16+ Monocyte	Upregulated	529	327	1	0	0	281	0	0	0	0	0	0	0	15	1	5	0	0	0	0	0	2	605	0	202	5	316	240	0	0	0
		Downregulated	430	198	0	0	0	272	0	1	0	0	0	0	0	6	6	1	0	0	0	0	0	0	467	0	216	0	175	153	0	0	0
	DCs	Upregulated	0	0	0	0	0	0	0	0	0	0	0	0	0	0	0	0	0	0	0	0	0	0	0	0	0	0	0	0	0	0	0
		Downregulated	0	0	0	0	0	0	0	0	0	0	0	0	0	0	0	0	0	0	0	0	0	0	0	0	0	0	0	0	0	0	0
	pDC	Upregulated	0	0	0	0	0	0	0	0	0	0	0	0	0	0	0	0	0	0	0	0	0	0	0	0	0	0	0	0	0	0	0
		Downregulated	0	0	0	0	0	0	0	0	0	0	0	0	0	0	0	0	0	0	0	0	0	0	0	0	0	0	0	0	0	0	0
NK Cell	CD56dim NK	Upregulated	112	75	0	0	37	31	77	1	0	0	0	84	0	0	1	0	28	18	15	0	0	0	98	168	64	20	55	52	0	0	0
		Downregulated	30	10	0	0	6	7	42	0	0	0	0	38	0	0	0	0	71	66	60	0	0	0	31	79	15	1	10	4	0	0	0
	CD56bright NK	Upregulated	69	28	0	0	7	4	45	0	0	0	0	41	0	0	0	0	11	4	4	0	0	0	66	94	1	0	7	7	0	0	0
		Downregulated	24	5	0	0	4	0	15	0	0	0	0	17	0	0	0	0	21	24	14	0	0	0	23	32	2	0	1	5	1	0	0
	Proliferating NK	Upregulated	0	0	0	0	0	0	0	0	0	0	0	0	0	0	0	0	0	0	0	0	0	0	0	0	0	0	0	0	0	0	0
		Downregulated	0	0	0	0	0	0	0	0	0	0	0	0	0	0	0	0	0	0	0	0	0	0	0	0	0	0	0	0	0	0	0
CD8+ & Unconventional T	Naive CD8+ T	Upregulated	95	61	0	0	40	65	83	20	0	0	0	81	0	0	0	0	12	9	16	0	0	0	81	122	81	5	38	39	0	0	0
		Downregulated	42	6	0	0	9	3	37	8	0	1	0	19	0	0	0	0	68	56	54	0	0	0	38	61	42	2	15	3	0	0	0
	GZMKhi CD8+ T	Upregulated	95	38	0	0	0	14	0	0	0	0	0	0	0	0	0	0	0	0	0	0	0	0	87	0	0	29	21	1	0	0	0
		Downregulated	63	10	0	0	0	0	0	0	0	0	0	0	0	0	0	0	0	0	0	0	0	0	80	0	0	4	13	0	0	0	0
	CD8+ TEMRA	Upregulated	0	0	0	0	0	0	0	0	0	0	0	0	0	0	0	0	0	0	0	0	0	0	0	0	0	0	0	0	0	0	0
		Downregulated	0	0	0	0	0	0	0	0	0	0	0	0	0	0	0	0	0	0	0	0	0	0	0	0	0	0	0	0	0	0	0
	MAIT	Upregulated	49	0	0	0	0	62	0	0	0	0	0	0	0	0	0	0	0	0	0	0	0	0	49	0	0	0	0	0	0	0	0
		Downregulated	16	0	0	0	0	58	0	0	0	0	0	0	0	0	0	0	0	0	0	0	0	0	16	0	0	0	0	0	0	0	0
	CD8- γδ T	Upregulated	25	34	0	0	0	8	0	0	0	0	0	0	0	0	1	0	0	0	0	0	0	0	42	0	0	16	21	10	0	0	0
		Downregulated	9	11	0	0	0	2	0	0	0	0	0	0	0	0	0	0	0	0	0	0	0	0	29	0	0	2	5	1	0	0	0
	CD8+ γδ T	Upregulated	0	0	0	0	0	0	0	0	3	0	0	0	0	0	0	0	0	0	0	0	0	0	0	0	0	3	0	0	0	0	0
		Downregulated	0	0	0	0	0	0	0	0	0	0	0	0	0	0	0	0	0	0	0	0	0	0	0	0	0	0	0	0	0	0	0
	Proliferating T	Upregulated	0	0	0	0	0	0	0	0	0	0	0	0	0	0	0	0	0	0	0	0	0	0	0	0	0	0	0	0	0	0	0
		Downregulated	0	0	0	0	0	0	0	0	0	0	0	0	0	0	0	0	0	0	0	0	0	0	0	0	0	0	0	0	0	0	0
CD4+ T	Naive CD4+ T	Upregulated	115	78	0	0	75	83	109	1	0	0	54	115	0	0	0	0	36	29	25	0	0	0	103	161	104	11	54	63	0	0	0
		Downregulated	59	8	0	0	38	8	75	6	0	0	0	51	0	0	0	0	96	88	83	0	0	0	57	138	70	1	28	8	0	0	0
	CD4+ TCM	Upregulated	84	63	0	0	0	15	36	0	0	0	0	35	0	0	0	0	2	5	3	0	0	0	89	93	0	14	47	6	0	0	0
		Downregulated	45	14	0	0	0	4	8	0	0	0	0	11	0	0	0	0	30	22	26	0	0	0	49	33	0	8	17	1	0	0	0
	Merged Memory CD4+ T	Upregulated	137	103	0	0	0	98	0	0	0	10	0	0	0	0	0	0	0	0	0	0	0	0	135	0	15	52	86	45	0	0	0
		Downregulated	78	58	0	0	0	30	0	0	0	1	0	0	0	0	0	0	0	0	0	0	0	0	82	0	1	35	35	34	0	0	0
	Naive Treg	Upregulated	116	75	0	0	0	87	0	1	0	5	2	0	0	0	0	0	0	0	0	0	0	0	113	0	21	25	57	21	0	0	0
		Downregulated	61	26	0	0	0	12	0	0	0	2	0	0	0	0	0	0	0	0	0	1	0	0	68	0	2	9	51	13	0	0	0
	Memory Treg	Upregulated	0	0	0	0	0	0	0	0	0	0	0	0	0	0	0	0	0	0	0	0	0	0	0	0	0	0	0	0	0	0	0
		Downregulated	0	0	0	0	0	0	0	0	0	0	0	0	0	0	0	0	0	0	0	0	0	0	0	0	0	0	0	0	0	0	0
B Cell	Naive B	Upregulated	125	85	0	0	66	107	90	0	0	0	0	96	0	0	0	0	23	18	15	0	0	0	124	161	69	43	67	25	0	0	0
		Downregulated	45	16	0	0	17	10	50	0	0	0	0	32	0	0	0	0	62	60	55	0	0	0	51	95	46	6	26	0	0	0	0
	TrB	Upregulated	144	123	0	0	0	69	0	0	0	0	1	0	1	0	0	0	0	0	0	0	0	0	142	0	45	56	89	112	0	0	0
		Downregulated	86	32	0	0	0	26	0	0	0	0	0	0	0	0	0	0	0	0	0	0	0	0	108	0	22	22	28	46	0	0	0
	Memory B	Upregulated	127	90	0	0	8	64	28	0	0	0	0	34	0	0	0	0	4	6	2	0	0	0	141	63	7	22	76	8	0	0	0
		Downregulated	64	15	0	0	1	7	8	0	0	0	0	9	0	0	0	0	20	11	6	0	0	0	59	24	5	1	16	1	0	0	0
	AIM2hi Memory B	Upregulated	0	0	0	0	0	0	0	0	0	0	0	0	0	0	0	0	0	0	0	0	0	0	0	0	0	0	0	0	0	0	0
		Downregulated	0	0	0	0	0	0	0	0	0	0	0	0	0	0	0	0	0	0	0	0	0	0	0	0	0	0	0	0	0	0	0
	DN2 B	Upregulated	0	0	0	0	0	0	0	0	0	0	0	0	0	0	0	0	0	0	0	0	0	0	0	0	0	0	0	0	0	0	0
		Downregulated	0	0	0	0	0	0	0	0	0	0	0	0	0	0	0	0	0	0	0	0	0	0	0	0	0	0	0	0	0	0	0
	Plasmablast	Upregulated	0	0	0	0	0	0	0	0	0	0	0	0	0	0	0	0	0	0	0	0	0	0	0	0	0	0	0	0	0	0	0
		Downregulated	0	0	0	0	0	0	0	0	0	0	0	0	0	0	0	0	0	0	0	0	0	0	0	0	0	0	0	0	0	0	0
Other	Erythroblast	Upregulated	0	0	0	0	0	0	0	0	0	0	0	0	0	0	0	0	0	0	0	0	0	0	0	0	0	0	0	0	0	0	0
		Downregulated	0	0	0	0	0	0	0	0	0	0	0	0	0	0	0	0	0	0	0	0	0	0	0	0	0	0	0	0	0	0	0
	HSPC	Upregulated	0	0	0	0	0	0	0	0	0	0	0	0	0	0	0	0	0	0	0	0	0	0	0	0	0	0	0	0	0	0	0
		Downregulated	0	0	0	0	0	0	0	0	0	0	0	0	0	0	0	0	0	0	0	0	0	0	0	0	0	0	0	0	0	0	0
	ILC2	Upregulated	0	0	0	0	0	0	0	0	0	0	0	0	0	0	0	0	0	0	0	0	0	0	0	0	0	0	0	0	0	0	0
		Downregulated	0	0	0	0	0	0	0	0	0	0	0	0	0	0	0	0	0	0	0	0	0	0	0	0	0	0	0	0	0	0	0
	MGK	Upregulated	0	0	0	0	0	0	0	0	0	0	0	0	0	0	0	0	0	0	0	0	0	0	0	0	0	0	0	0	0	0	0
		Downregulated	0	0	0	0	0	0	0	0	0	0	0	0	0	0	0	0	0	0	0	0	0	0	0	0	0	0	0	0	0	0	0
	Cycling T	Upregulated	0	0	0	0	0	0	0	0	0	0	0	0	0	0	0	0	0	0	0	0	0	0	0	0	0	0	0	0	0	0	0
		Downregulated	0	0	0	0	0	0	0	0	0	0	0	0	0	0	0	0	0	0	0	0	0	0	0	0	0	0	0	0	0	0	0
DE: Differential Expression	Note: ISGhi clusters are merged with respective ISGlo; CD163hi Monocytes are merged with CD14+ Monocytes
EdgeR Processing
Minimum # of Cells to Include Sample	25
% of cells expressing gene in at least 3 samples	0.2
Minimum # of samples in group for comparison	3
Covariates
Batch
Age
Sex
DE Gene Selection
log FC	> 0.5
FDR	< 5%

## Sheet: COVID_G2G3 vs Healthy
Gene	Cell Type	logFC	logCPM	F	PValue	p.adjusted
EEF2	CD14+ Monocyte	-1.26207	8.9705	81.378	2.21074e-12	1.45113e-08
EIF4B	CD14+ Monocyte	-1.65927	7.42576	77.6094	4.7921e-12	1.57277e-08
EIF3L	CD14+ Monocyte	-1.59733	7.18058	73.5754	1.12491e-11	2.46129e-08
EEF1B2	CD14+ Monocyte	-1.55407	8.83508	72.1543	1.52899e-11	2.50907e-08
EEF1A1	CD14+ Monocyte	-1.14793	12.3192	69.583	2.68967e-11	3.49675e-08
RPS3A	CD14+ Monocyte	-1.42381	10.9717	68.4998	3.42453e-11	3.49675e-08
TPT1	CD14+ Monocyte	-1.08657	12.1091	68.1202	3.72901e-11	3.49675e-08
RPL4	CD14+ Monocyte	-1.19685	9.41984	62.3894	1.39554e-10	1.14504e-07
MRPS18C	CD14+ Monocyte	1.08869	6.28597	61.4593	1.74135e-10	1.27002e-07
SIGLEC1	CD14+ Monocyte	4.64718	6.64046	60.1096	2.43391e-10	1.59762e-07
RPL6	CD14+ Monocyte	-1.06185	10.6869	58.5474	3.51081e-10	2.08997e-07
RPL5	CD14+ Monocyte	-1.41419	9.97519	57.3915	4.6634e-10	2.08997e-07
LY96	CD14+ Monocyte	0.979752	7.20502	57.3186	4.74912e-10	2.08997e-07
SNHG29	CD14+ Monocyte	-1.32064	8.06159	57.0178	5.11532e-10	2.08997e-07
RPL9	CD14+ Monocyte	-0.978795	10.7985	56.9181	5.24298e-10	2.08997e-07
HIST2H2BE	CD14+ Monocyte	2.00526	3.79042	56.8821	5.25977e-10	2.08997e-07
EEF1G	CD14+ Monocyte	-1.07802	9.33953	56.6241	5.64005e-10	2.08997e-07
SORL1	CD14+ Monocyte	-1.19209	7.30645	56.0701	6.47671e-10	2.08997e-07
CCT6A	CD14+ Monocyte	-0.599722	6.55067	55.9585	6.66147e-10	2.08997e-07
RPS23	CD14+ Monocyte	-0.947627	11.0372	55.8829	6.78592e-10	2.08997e-07
EIF3E	CD14+ Monocyte	-0.89159	8.44908	55.7634	6.99237e-10	2.08997e-07
IFI27	CD14+ Monocyte	10.0656	9.59102	54.5632	7.00479e-10	2.08997e-07
ATP13A1	CD14+ Monocyte	0.985247	5.21501	54.9411	8.63223e-10	2.46356e-07
IFITM3	CD14+ Monocyte	3.91463	10.4524	54.5798	9.42331e-10	2.56945e-07
E2F2	CD14+ Monocyte	2.70823	3.21048	53.6408	1.01289e-09	2.56945e-07
RPS27A	CD14+ Monocyte	-0.888452	10.9552	54.2764	1.01776e-09	2.56945e-07
OASL	CD14+ Monocyte	3.4293	6.1349	53.9342	1.11556e-09	2.71205e-07
LY6E	CD14+ Monocyte	2.89459	9.32369	53.7538	1.16282e-09	2.72599e-07
HSH2D	CD14+ Monocyte	1.56197	5.67391	53.5388	1.23146e-09	2.78733e-07
CALML4	CD14+ Monocyte	0.896624	5.25792	53.3566	1.29089e-09	2.78757e-07
EIF3H	CD14+ Monocyte	-0.635842	7.99258	53.2691	1.31649e-09	2.78757e-07
RBX1	CD14+ Monocyte	0.718133	7.74782	52.8827	1.45412e-09	2.98276e-07
RPL7	CD14+ Monocyte	-1.07822	10.2703	52.2569	1.7092e-09	3.1806e-07
EIF2D	CD14+ Monocyte	-0.996886	3.74653	52.1884	1.76462e-09	3.1806e-07
RPLP0	CD14+ Monocyte	-1.42088	9.41412	52.118	1.77195e-09	3.1806e-07
IFITM2	CD14+ Monocyte	2.28704	9.68944	52.087	1.78627e-09	3.1806e-07
RPL15	CD14+ Monocyte	-0.92974	10.8388	52.0728	1.79284e-09	3.1806e-07
QARS	CD14+ Monocyte	-0.958721	5.63134	51.6044	2.02745e-09	3.48064e-07
IFI44	CD14+ Monocyte	3.08192	7.52732	51.5285	2.06802e-09	3.48064e-07
RAB10	CD14+ Monocyte	0.618604	7.54159	51.2338	2.23167e-09	3.5372e-07
ADI1	CD14+ Monocyte	-0.536873	6.08353	51.1847	2.26149e-09	3.5372e-07
XAF1	CD14+ Monocyte	2.28583	8.62302	51.0901	2.31712e-09	3.5372e-07
RPS8	CD14+ Monocyte	-0.937399	11.1136	51.0784	2.32398e-09	3.5372e-07
PABPC1	CD14+ Monocyte	-0.955875	10.2811	51.0019	2.37106e-09	3.5372e-07
IFI44L	CD14+ Monocyte	4.1234	8.98668	50.8253	2.48459e-09	3.62419e-07
CTSL	CD14+ Monocyte	2.14947	5.12743	50.647	2.61726e-09	3.63206e-07
RPL13	CD14+ Monocyte	-0.868213	11.8308	50.5931	2.6402e-09	3.63206e-07
RPS6	CD14+ Monocyte	-1.09914	10.6567	50.5704	2.65598e-09	3.63206e-07
BTF3	CD14+ Monocyte	-0.712329	9.15084	50.2625	2.8809e-09	3.77848e-07
RPS4X	CD14+ Monocyte	-1.07273	10.5311	50.1606	2.95954e-09	3.77848e-07
EPSTI1	CD14+ Monocyte	2.61383	7.82461	50.1454	2.97234e-09	3.77848e-07
EIF3F	CD14+ Monocyte	-0.86316	7.78442	50.118	2.99331e-09	3.77848e-07
PTPRO	CD14+ Monocyte	1.49551	3.51588	49.64	3.30375e-09	4.09166e-07
KLHDC7B	CD14+ Monocyte	3.22863	4.7675	49.4819	3.59861e-09	4.37431e-07
RPL3	CD14+ Monocyte	-1.28029	10.2969	49.3436	3.67704e-09	4.38838e-07
PLAC8	CD14+ Monocyte	3.1046	8.59354	49.2453	3.77529e-09	4.42518e-07
RPL10A	CD14+ Monocyte	-1.09696	9.9542	49.1731	3.84833e-09	4.43165e-07
RTP4	CD14+ Monocyte	2.20934	3.791	49.0115	3.96924e-09	4.49209e-07
CSDE1	CD14+ Monocyte	-0.531212	8.04276	48.9405	4.09565e-09	4.50745e-07
DDX60	CD14+ Monocyte	2.16162	5.91977	48.9322	4.12016e-09	4.50745e-07
IFI6	CD14+ Monocyte	3.7402	9.26688	48.7229	4.34192e-09	4.67219e-07
CTDSP2	CD14+ Monocyte	-0.560636	6.06992	48.3381	4.8177e-09	5.10055e-07
HIST1H1E	CD14+ Monocyte	1.63178	6.00789	48.2543	4.95453e-09	5.16214e-07
NOP53	CD14+ Monocyte	-0.827893	7.66535	48.1089	5.12235e-09	5.25016e-07
OTOF	CD14+ Monocyte	6.81053	4.93003	45.3638	5.19897e-09	5.25016e-07
EIF2S3	CD14+ Monocyte	-0.577531	7.77831	47.9965	5.28037e-09	5.25156e-07
RPL21	CD14+ Monocyte	-0.823669	11.0125	47.8529	5.48928e-09	5.3077e-07
RPL22	CD14+ Monocyte	-0.782425	10.081	47.8467	5.49854e-09	5.3077e-07
RPL18	CD14+ Monocyte	-0.699785	10.7386	47.3056	6.36898e-09	6.05883e-07
RPL7A	CD14+ Monocyte	-0.884757	10.6145	47.2174	6.52388e-09	6.11754e-07
CCNY	CD14+ Monocyte	-0.67828	7.02943	47.1516	6.64314e-09	6.14163e-07
PCBP2	CD14+ Monocyte	-0.679871	8.42318	46.9623	6.9943e-09	6.37647e-07
RPL10	CD14+ Monocyte	-0.975091	11.8131	46.716	7.48196e-09	6.72762e-07
MPST	CD14+ Monocyte	-0.818016	5.14991	46.2306	8.56178e-09	7.52088e-07
RPLP1	CD14+ Monocyte	-0.821989	12.1806	46.1861	8.65444e-09	7.52088e-07
DYM	CD14+ Monocyte	-0.587262	4.86377	46.1742	8.7079e-09	7.52088e-07
USP18	CD14+ Monocyte	4.70677	4.84248	45.6443	9.55972e-09	8.14935e-07
RPS7	CD14+ Monocyte	-0.771494	10.6275	45.7249	9.83002e-09	8.27234e-07
RPS2	CD14+ Monocyte	-0.946158	11.4786	45.6578	1.00143e-08	8.32073e-07
SP110	CD14+ Monocyte	1.30353	7.76629	45.4805	1.05203e-08	8.63188e-07
MPRIP	CD14+ Monocyte	-0.983028	4.67314	45.356	1.09374e-08	8.86335e-07
IFIH1	CD14+ Monocyte	2.15142	6.46136	45.2043	1.13733e-08	9.10423e-07
RPS13	CD14+ Monocyte	-0.732541	11.1518	45.0514	1.18525e-08	9.27764e-07
SNRNP200	CD14+ Monocyte	-0.579651	5.69309	45.0124	1.19942e-08	9.27764e-07
MX1	CD14+ Monocyte	2.89003	8.58825	44.9166	1.23086e-08	9.3946e-07
RPS16	CD14+ Monocyte	-0.776864	10.5783	44.7226	1.29921e-08	9.64622e-07
EIF3M	CD14+ Monocyte	-0.583791	7.55056	44.6697	1.31873e-08	9.64622e-07
CYBRD1	CD14+ Monocyte	-1.62303	4.29075	44.7057	1.31954e-08	9.64622e-07
EIF2AK2	CD14+ Monocyte	1.84038	7.58014	44.6598	1.32261e-08	9.64622e-07
RPS14	CD14+ Monocyte	-0.816922	11.3645	44.5215	1.3745e-08	9.91452e-07
RGL1	CD14+ Monocyte	2.76517	3.71604	44.1097	1.39812e-08	9.97525e-07
CMPK2	CD14+ Monocyte	2.8948	6.3871	44.0297	1.58444e-08	1.11103e-06
KIAA1958	CD14+ Monocyte	1.70726	4.76914	44.0173	1.59921e-08	1.11103e-06
SAMD9	CD14+ Monocyte	1.89489	7.32694	43.6647	1.75054e-08	1.18632e-06
RACK1	CD14+ Monocyte	-0.784062	10.2757	43.6576	1.75309e-08	1.18632e-06
RPL8	CD14+ Monocyte	-0.697467	10.5638	43.5641	1.80011e-08	1.2026e-06
PSMB3	CD14+ Monocyte	0.588739	7.96512	43.5277	1.81886e-08	1.2026e-06
TRPS1	CD14+ Monocyte	-0.689316	6.28576	43.5035	1.83211e-08	1.2026e-06
PLSCR1	CD14+ Monocyte	1.48575	8.00058	43.3636	1.90562e-08	1.23846e-06
IGFLR1	CD14+ Monocyte	0.932568	6.3073	43.1376	2.03264e-08	1.29722e-06
UXT	CD14+ Monocyte	-0.509751	6.95517	43.1301	2.03646e-08	1.29722e-06
SLC25A5	CD14+ Monocyte	-0.890413	7.9554	43.0973	2.05532e-08	1.29722e-06
EIF1	CD14+ Monocyte	-0.683211	11.2515	43.026	2.09738e-08	1.31116e-06
CRTAP	CD14+ Monocyte	-0.795526	6.85608	42.9743	2.12895e-08	1.31834e-06
H2AFJ	CD14+ Monocyte	1.07057	7.03944	42.8166	2.22689e-08	1.36611e-06
PRKX	CD14+ Monocyte	-0.833212	5.61795	42.3223	2.56721e-08	1.56029e-06
RPS24	CD14+ Monocyte	-0.700037	11.6375	41.9624	2.84452e-08	1.6974e-06
ZBP1	CD14+ Monocyte	3.06392	4.81808	41.7602	3.0373e-08	1.77589e-06
KIN	CD14+ Monocyte	0.588206	5.24742	41.7395	3.04075e-08	1.77589e-06
IFITM1	CD14+ Monocyte	6.06966	7.6514	41.5808	3.05721e-08	1.77589e-06
PARP9	CD14+ Monocyte	1.88929	7.17594	41.4417	3.3077e-08	1.90454e-06
IFI16	CD14+ Monocyte	1.16537	8.59107	41.3263	3.41903e-08	1.95152e-06
NACA	CD14+ Monocyte	-0.618435	10.6776	41.2955	3.44962e-08	1.95201e-06
PABPN1	CD14+ Monocyte	-0.50917	6.6893	41.0661	3.68823e-08	2.05166e-06
RPS11	CD14+ Monocyte	-0.685467	10.7281	40.8301	3.94989e-08	2.17874e-06
IRF7	CD14+ Monocyte	2.09561	7.46376	40.5419	4.2978e-08	2.3509e-06
SEC11A	CD14+ Monocyte	-0.574486	7.96799	40.5048	4.34403e-08	2.35655e-06
EPHB2	CD14+ Monocyte	1.90888	3.9702	40.3369	4.58618e-08	2.46751e-06
RHOG	CD14+ Monocyte	0.571779	8.11808	40.1856	4.77036e-08	2.54206e-06
STT3B	CD14+ Monocyte	-0.502254	6.54239	40.1638	4.80219e-08	2.54206e-06
COMMD6	CD14+ Monocyte	-0.529652	8.22406	40.0892	4.9075e-08	2.57703e-06
OAS2	CD14+ Monocyte	2.207	7.29074	39.9367	5.13487e-08	2.67502e-06
PRKDC	CD14+ Monocyte	-0.807025	6.02534	39.8269	5.3047e-08	2.74174e-06
CALM3	CD14+ Monocyte	0.629817	7.53203	39.7965	5.34971e-08	2.7434e-06
RPL26	CD14+ Monocyte	-0.725792	11.525	39.6324	5.61501e-08	2.85713e-06
RPL17	CD14+ Monocyte	-0.794913	10.9391	39.3896	6.0335e-08	3.04646e-06
RPL13A	CD14+ Monocyte	-0.824402	10.9426	39.3104	6.17686e-08	3.08438e-06
IFIT1	CD14+ Monocyte	4.1411	7.22255	39.3061	6.20259e-08	3.08438e-06
RIPK3	CD14+ Monocyte	1.14843	3.80481	39.3057	6.25218e-08	3.08566e-06
CCNI	CD14+ Monocyte	-0.502518	8.86435	38.8502	7.08322e-08	3.46972e-06
RRAS	CD14+ Monocyte	1.07265	6.20649	38.6902	7.43274e-08	3.61396e-06
STAC3	CD14+ Monocyte	1.07324	5.73288	38.6419	7.5452e-08	3.64167e-06
NEXN	CD14+ Monocyte	2.93908	5.10222	38.4055	8.16581e-08	3.85614e-06
HERC6	CD14+ Monocyte	2.0831	4.17369	38.2454	8.45949e-08	3.96629e-06
RPL34	CD14+ Monocyte	-0.67136	11.4109	38.1779	8.66263e-08	4.03273e-06
SH2B2	CD14+ Monocyte	1.35104	4.42599	38.1188	8.87822e-08	4.10399e-06
TRIM34	CD14+ Monocyte	0.986491	4.97748	37.9009	9.46479e-08	4.34454e-06
OAS1	CD14+ Monocyte	1.8339	7.52373	37.6903	1.00358e-07	4.54586e-06
ATP10A	CD14+ Monocyte	1.65778	3.82335	37.657	1.01216e-07	4.54586e-06
SAMD9L	CD14+ Monocyte	2.19266	7.6061	37.6494	1.01618e-07	4.54586e-06
FAM168B	CD14+ Monocyte	-0.833056	4.34473	37.6581	1.01804e-07	4.54586e-06
ISG15	CD14+ Monocyte	3.4695	9.4832	37.5651	1.04215e-07	4.6221e-06
PHF11	CD14+ Monocyte	0.964365	6.46465	37.5411	1.05019e-07	4.62649e-06
VPS51	CD14+ Monocyte	-0.706465	5.46482	37.4747	1.07187e-07	4.69049e-06
TMA7	CD14+ Monocyte	-0.53846	8.55684	37.3621	1.10827e-07	4.81769e-06
DRAP1	CD14+ Monocyte	0.872063	7.74871	37.1354	1.18733e-07	5.12739e-06
MMGT1	CD14+ Monocyte	-0.59125	5.06524	37.0986	1.20336e-07	5.16264e-06
IPO5	CD14+ Monocyte	-1.04388	4.59573	37.0692	1.21622e-07	5.18396e-06
MRPL22	CD14+ Monocyte	0.646391	4.917	36.9817	1.2473e-07	5.25557e-06
RPL24	CD14+ Monocyte	-0.568373	10.1617	36.9688	1.24904e-07	5.25557e-06
ST13	CD14+ Monocyte	-0.667562	6.64308	36.8664	1.28891e-07	5.34236e-06
PSMA6	CD14+ Monocyte	0.646445	7.56527	36.8653	1.28917e-07	5.34236e-06
OIP5-AS1	CD14+ Monocyte	-0.600616	6.15088	36.8541	1.29408e-07	5.34236e-06
SRSF6	CD14+ Monocyte	-0.675285	6.7091	36.7905	1.31911e-07	5.41165e-06
RSAD2	CD14+ Monocyte	4.1263	6.99124	36.6398	1.38664e-07	5.65336e-06
HGSNAT	CD14+ Monocyte	-0.708442	5.26418	36.5115	1.43823e-07	5.82237e-06
TDRD7	CD14+ Monocyte	1.1082	4.53684	36.5142	1.44584e-07	5.82237e-06
FBL	CD14+ Monocyte	-0.932465	5.78049	36.4089	1.48317e-07	5.93629e-06
RPS3	CD14+ Monocyte	-0.722016	10.6301	36.3484	1.51001e-07	5.99115e-06
SHISA5	CD14+ Monocyte	0.865772	6.80496	36.3382	1.51513e-07	5.99115e-06
RPS15A	CD14+ Monocyte	-0.633438	11.0017	36.2777	1.54318e-07	6.0324e-06
DHX58	CD14+ Monocyte	1.92158	4.55395	36.3045	1.54394e-07	6.0324e-06
IFIT5	CD14+ Monocyte	2.08804	4.78209	36.1123	1.60784e-07	6.24487e-06
PARP12	CD14+ Monocyte	1.49453	5.78777	35.99	1.68847e-07	6.46017e-06
MS4A4A	CD14+ Monocyte	2.69442	5.39262	36.0003	1.69279e-07	6.46017e-06
IFIT3	CD14+ Monocyte	3.75454	7.51964	35.8894	1.74064e-07	6.60436e-06
RNASE2	CD14+ Monocyte	2.71444	6.91227	35.7764	1.80219e-07	6.7476e-06
OSTC	CD14+ Monocyte	-0.590307	6.49763	35.7622	1.80923e-07	6.7476e-06
OAS3	CD14+ Monocyte	2.50259	6.74017	35.7328	1.82656e-07	6.77376e-06
SLC25A6	CD14+ Monocyte	-0.808384	9.18665	35.4962	1.96415e-07	7.24307e-06
SP100	CD14+ Monocyte	0.763316	7.83008	35.3973	2.02547e-07	7.4275e-06
JMJD1C	CD14+ Monocyte	-0.632261	8.16846	35.3444	2.0589e-07	7.50811e-06
NUDT3	CD14+ Monocyte	-0.659154	6.24375	35.2729	2.10601e-07	7.63749e-06
GMPR	CD14+ Monocyte	3.24711	4.15758	35.0837	2.21975e-07	8.00573e-06
TTC3	CD14+ Monocyte	-0.918852	6.41231	35.0604	2.24978e-07	8.06971e-06
MYL12A	CD14+ Monocyte	0.673717	9.35446	34.9263	2.34518e-07	8.36619e-06
ST3GAL2	CD14+ Monocyte	0.630392	4.99533	34.8645	2.39723e-07	8.50563e-06
PSMC2	CD14+ Monocyte	0.693077	5.35945	34.8243	2.4253e-07	8.53681e-06
MAIP1	CD14+ Monocyte	0.930387	3.92488	34.84	2.43203e-07	8.53681e-06
RPL23A	CD14+ Monocyte	-0.657759	10.5011	34.7543	2.47468e-07	8.64031e-06
RPS5	CD14+ Monocyte	-0.859064	9.23603	34.5153	2.667e-07	9.16555e-06
NOSIP	CD14+ Monocyte	0.620517	5.87159	34.4967	2.68423e-07	9.1767e-06
ARHGAP25	CD14+ Monocyte	0.758829	5.50955	34.4635	2.7152e-07	9.20243e-06
KRT10	CD14+ Monocyte	-1.12158	5.9964	34.4541	2.71979e-07	9.20243e-06
ADAR	CD14+ Monocyte	1.01219	7.75401	34.2651	2.88542e-07	9.71276e-06
IFI35	CD14+ Monocyte	1.83699	6.99683	34.1918	2.95318e-07	9.89015e-06
ORMDL2	CD14+ Monocyte	0.612861	5.21515	34.1397	3.0057e-07	1.00149e-05
TRIM22	CD14+ Monocyte	1.58751	7.7099	33.9891	3.14774e-07	1.04352e-05
RENBP	CD14+ Monocyte	0.615857	4.59678	33.9448	3.20118e-07	1.05591e-05
ALAS1	CD14+ Monocyte	0.972771	4.3789	33.8408	3.32132e-07	1.08463e-05
TAF15	CD14+ Monocyte	-0.516906	6.03793	33.7565	3.38884e-07	1.1012e-05
BLOC1S1	CD14+ Monocyte	0.657902	8.19569	33.6717	3.4799e-07	1.12522e-05
YBX3	CD14+ Monocyte	-0.876482	8.46108	33.5117	3.66093e-07	1.17796e-05
CHMP5	CD14+ Monocyte	1.25108	6.98402	33.376	3.82318e-07	1.22417e-05
EIF3D	CD14+ Monocyte	-0.521565	6.98068	33.3563	3.84658e-07	1.22568e-05
MT-CYB	CD14+ Monocyte	-0.999596	12.0584	33.2823	3.9379e-07	1.24872e-05
SETD7	CD14+ Monocyte	-0.709661	5.20994	33.0511	4.2437e-07	1.33281e-05
RPL18A	CD14+ Monocyte	-0.607067	11.078	32.9735	4.34558e-07	1.3583e-05
C20orf194	CD14+ Monocyte	-0.762445	4.26411	32.9284	4.43158e-07	1.37862e-05
IKBKE	CD14+ Monocyte	0.980816	4.76162	32.7659	4.65834e-07	1.44233e-05
DANCR	CD14+ Monocyte	-1.66533	3.35084	32.588	4.98645e-07	1.53667e-05
LMNB1	CD14+ Monocyte	1.35939	6.01338	32.5174	5.0351e-07	1.54441e-05
DDX58	CD14+ Monocyte	1.87623	6.33402	32.3948	5.23853e-07	1.59193e-05
SERPING1	CD14+ Monocyte	3.92191	5.42276	32.2714	5.47982e-07	1.63721e-05
CAPG	CD14+ Monocyte	0.689619	8.11921	32.247	5.4873e-07	1.63721e-05
ATL3	CD14+ Monocyte	-0.515067	5.27992	32.1215	5.72119e-07	1.69927e-05
ADAM15	CD14+ Monocyte	-0.843595	5.64172	32.0398	5.86984e-07	1.73557e-05
LGALS1	CD14+ Monocyte	0.699869	10.69	31.9334	6.0724e-07	1.78741e-05
CREG1	CD14+ Monocyte	0.705862	7.18821	31.7752	6.39253e-07	1.87324e-05
TRIM69	CD14+ Monocyte	1.39519	5.05338	31.6864	6.59398e-07	1.91613e-05
GPR65	CD14+ Monocyte	0.862865	6.26885	31.6745	6.60735e-07	1.91613e-05
HELZ2	CD14+ Monocyte	1.62112	5.64927	31.668	6.62647e-07	1.91613e-05
RPL35A	CD14+ Monocyte	-0.557987	10.8074	31.5865	6.79585e-07	1.95535e-05
KLHDC3	CD14+ Monocyte	-0.565958	5.0129	31.5783	6.82168e-07	1.95535e-05
GPANK1	CD14+ Monocyte	0.745475	4.53333	31.5603	6.88886e-07	1.96602e-05
TCN2	CD14+ Monocyte	2.174	5.0782	31.4246	7.19736e-07	2.04517e-05
PML	CD14+ Monocyte	1.53868	5.49157	31.2911	7.49548e-07	2.12071e-05
HP1BP3	CD14+ Monocyte	-0.514167	7.03641	31.1967	7.71734e-07	2.1741e-05
SLC4A7	CD14+ Monocyte	-0.887005	4.66416	31.1881	7.76429e-07	2.17762e-05
TNFSF13B	CD14+ Monocyte	0.881913	8.80708	31.1503	7.83443e-07	2.17903e-05
PRKAR2A	CD14+ Monocyte	-0.61557	6.03778	31.0314	8.14833e-07	2.2491e-05
CTNNB1	CD14+ Monocyte	-0.7314	7.58364	30.9848	8.27094e-07	2.26967e-05
RPL27	CD14+ Monocyte	-0.61979	10.0276	30.9744	8.29861e-07	2.26967e-05
RPS17	CD14+ Monocyte	-0.726224	9.41322	30.943	8.38452e-07	2.28365e-05
PABPC4	CD14+ Monocyte	-0.92775	6.3759	30.8462	8.65689e-07	2.34809e-05
RPL29	CD14+ Monocyte	-0.548437	10.8618	30.8116	8.75381e-07	2.36461e-05
TIMP1	CD14+ Monocyte	0.717705	8.41212	30.7761	8.8567e-07	2.36852e-05
HSPA8	CD14+ Monocyte	-1.13934	8.19495	30.7734	8.86444e-07	2.36852e-05
PSMA3	CD14+ Monocyte	0.561448	6.47444	30.7699	8.87654e-07	2.36852e-05
HERC5	CD14+ Monocyte	2.8754	6.42397	30.0974	1.10959e-06	2.92503e-05
LILRB2	CD14+ Monocyte	0.696681	8.17256	29.9877	1.14897e-06	3.0073e-05
MAZ	CD14+ Monocyte	-0.569818	6.08345	29.9154	1.17718e-06	3.06626e-05
MYD88	CD14+ Monocyte	0.582365	7.15025	29.8801	1.19088e-06	3.08969e-05
NT5C3A	CD14+ Monocyte	2.10617	6.48323	29.8448	1.20547e-06	3.11523e-05
CSF3R	CD14+ Monocyte	-0.589715	8.61802	29.8245	1.21296e-06	3.1223e-05
SPATS2L	CD14+ Monocyte	2.3201	4.98046	29.7537	1.24863e-06	3.20156e-05
TOR1B	CD14+ Monocyte	1.45788	4.88871	29.7198	1.26016e-06	3.21857e-05
MX2	CD14+ Monocyte	1.78248	8.14421	29.6482	1.28634e-06	3.27268e-05
NT5DC1	CD14+ Monocyte	-1.00509	4.13959	29.5871	1.32031e-06	3.33327e-05
TGS1	CD14+ Monocyte	0.501162	4.81613	29.5047	1.35265e-06	3.40184e-05
ARID5B	CD14+ Monocyte	1.85934	4.02674	29.5047	1.35882e-06	3.40431e-05
MNDA	CD14+ Monocyte	0.577197	10.9856	29.4689	1.36556e-06	3.40818e-05
LGALS3BP	CD14+ Monocyte	3.32811	5.40968	29.4693	1.37267e-06	3.41295e-05
ROMO1	CD14+ Monocyte	0.646241	6.61691	29.3946	1.40015e-06	3.46815e-05
CIR1	CD14+ Monocyte	0.624488	6.8669	29.3052	1.4426e-06	3.55985e-05
NOL4L	CD14+ Monocyte	0.971689	3.59018	29.122	1.54379e-06	3.79528e-05
ALPK1	CD14+ Monocyte	0.847665	5.27762	29.0907	1.55326e-06	3.79637e-05
MAP3K20	CD14+ Monocyte	-0.66746	5.67672	29.0811	1.55579e-06	3.79637e-05
SNX20	CD14+ Monocyte	0.704576	5.72683	29.0243	1.58567e-06	3.85494e-05
MT-ND5	CD14+ Monocyte	-0.695847	10.6536	28.8996	1.65271e-06	3.96386e-05
SHFL	CD14+ Monocyte	1.04456	5.70331	28.8927	1.65785e-06	3.96386e-05
ZCCHC10	CD14+ Monocyte	0.572117	5.18669	28.8911	1.65962e-06	3.96386e-05
NCOA7	CD14+ Monocyte	1.51853	5.79645	28.8894	1.66067e-06	3.96386e-05
MT-CO3	CD14+ Monocyte	-0.924017	13.1127	28.8163	1.69973e-06	4.0278e-05
KIF22	CD14+ Monocyte	-1.07464	4.40612	28.7377	1.75044e-06	4.11667e-05
FCGR3A	CD14+ Monocyte	1.95706	6.59529	28.7297	1.75105e-06	4.11667e-05
RBM14	CD14+ Monocyte	-0.620816	5.22805	28.7231	1.75604e-06	4.11667e-05
MRPL27	CD14+ Monocyte	0.585481	5.62228	28.6865	1.77687e-06	4.15066e-05
IFI30	CD14+ Monocyte	0.690885	10.5512	28.6387	1.80461e-06	4.20051e-05
APOBEC3A	CD14+ Monocyte	2.28375	8.70363	28.561	1.85269e-06	4.2972e-05
BX284668.5	CD14+ Monocyte	-1.13209	4.33217	28.3612	1.98987e-06	4.58298e-05
RPL23	CD14+ Monocyte	-0.706986	10.0586	28.2676	2.04617e-06	4.69617e-05
CNP	CD14+ Monocyte	0.973473	4.92214	28.1725	2.11792e-06	4.82708e-05
RPS18	CD14+ Monocyte	-0.70969	11.4264	28.13	2.14402e-06	4.86966e-05
TPCN1	CD14+ Monocyte	-0.871054	4.95748	28.1202	2.15363e-06	4.87463e-05
HRH2	CD14+ Monocyte	0.730297	6.77248	28.0498	2.20373e-06	4.9709e-05
DDX60L	CD14+ Monocyte	1.26971	7.06654	28.0008	2.24081e-06	5.03723e-05
AHNAK	CD14+ Monocyte	-0.866411	9.75367	27.9845	2.25284e-06	5.04697e-05
NMI	CD14+ Monocyte	1.04392	6.95607	27.8875	2.32885e-06	5.19952e-05
ZNFX1	CD14+ Monocyte	0.874844	5.82843	27.8659	2.34707e-06	5.22242e-05
SIL1	CD14+ Monocyte	0.6238	5.0774	27.8458	2.36496e-06	5.24447e-05
OGFRL1	CD14+ Monocyte	-0.651192	8.07311	27.7563	2.43523e-06	5.36405e-05
RPL32	CD14+ Monocyte	-0.544764	11.443	27.6951	2.48667e-06	5.45903e-05
GPATCH11	CD14+ Monocyte	-0.904342	4.06567	27.6373	2.54763e-06	5.57422e-05
GIMAP4	CD14+ Monocyte	1.03161	8.39418	27.6135	2.55717e-06	5.57651e-05
ISG20	CD14+ Monocyte	2.634	6.0276	27.5241	2.63906e-06	5.7171e-05
MICAL2	CD14+ Monocyte	-0.7943	5.50272	27.456	2.70066e-06	5.83128e-05
IMPDH2	CD14+ Monocyte	-1.17951	4.33211	27.4386	2.72223e-06	5.8586e-05
PPM1K	CD14+ Monocyte	1.33992	5.21745	27.4134	2.74638e-06	5.89125e-05
RBM3	CD14+ Monocyte	-0.696134	8.21461	27.327	2.82101e-06	6.03164e-05
TPMT	CD14+ Monocyte	0.767239	5.6644	27.2808	2.86782e-06	6.08984e-05
PIK3AP1	CD14+ Monocyte	0.700318	7.34518	27.2773	2.86985e-06	6.08984e-05
MTF1	CD14+ Monocyte	0.668434	5.73215	27.2725	2.87607e-06	6.08984e-05
C2	CD14+ Monocyte	2.22154	4.06281	27.2696	2.90202e-06	6.12504e-05
RAE1	CD14+ Monocyte	-0.752181	4.56481	27.233	2.92043e-06	6.13066e-05
MAVS	CD14+ Monocyte	-0.70804	5.25347	27.2263	2.92336e-06	6.13066e-05
TRIM21	CD14+ Monocyte	0.942338	4.80116	27.1606	2.99939e-06	6.23037e-05
KAT6B	CD14+ Monocyte	-0.554842	5.66221	27.1035	3.04802e-06	6.31142e-05
CMTR1	CD14+ Monocyte	1.03591	4.18222	27.0744	3.09623e-06	6.39109e-05
RPL11	CD14+ Monocyte	-0.50826	11.4342	26.936	3.22769e-06	6.64155e-05
APOBEC3G	CD14+ Monocyte	1.00391	5.52797	26.861	3.31467e-06	6.79921e-05
TMEM63A	CD14+ Monocyte	0.56596	4.38175	26.8301	3.3617e-06	6.87421e-05
PRKRA	CD14+ Monocyte	-0.62734	4.19178	26.7748	3.4256e-06	6.98312e-05
MT2A	CD14+ Monocyte	2.43228	8.4	26.7366	3.45824e-06	7.02784e-05
RPL28	CD14+ Monocyte	0.51123	12.1633	26.7118	3.48794e-06	7.06631e-05
N4BP1	CD14+ Monocyte	0.744189	6.15232	26.6997	3.50397e-06	7.07694e-05
ATOX1	CD14+ Monocyte	0.764525	7.07107	26.6027	3.62266e-06	7.27191e-05
FCGR1A	CD14+ Monocyte	1.63307	6.88508	26.5455	3.69558e-06	7.39566e-05
RPSA	CD14+ Monocyte	-0.684992	9.33033	26.4725	3.78995e-06	7.49989e-05
PNRC1	CD14+ Monocyte	-0.613172	9.07111	26.4711	3.79189e-06	7.49989e-05
BCAP29	CD14+ Monocyte	-0.513768	5.06702	26.4728	3.79336e-06	7.49989e-05
RAB8A	CD14+ Monocyte	0.55776	7.1074	26.3759	3.91971e-06	7.70328e-05
RPL19	CD14+ Monocyte	-0.500822	11.2081	26.2703	4.0662e-06	7.93764e-05
GAS5	CD14+ Monocyte	-1.0132	7.35617	26.2524	4.09191e-06	7.94653e-05
ZCCHC2	CD14+ Monocyte	1.21994	6.04509	26.1589	4.23044e-06	8.19133e-05
NDUFB3	CD14+ Monocyte	0.609649	7.0478	26.1301	4.27036e-06	8.2443e-05
DTX3L	CD14+ Monocyte	1.21864	6.49268	26.121	4.28561e-06	8.24949e-05
MT-CO1	CD14+ Monocyte	-0.71466	13.577	26.0978	4.31848e-06	8.28845e-05
GRN	CD14+ Monocyte	0.591694	9.69472	26.0262	4.42786e-06	8.4736e-05
MT1F	CD14+ Monocyte	1.51783	3.90277	26.0282	4.45165e-06	8.49438e-05
LGALS9	CD14+ Monocyte	0.865929	7.74346	25.9348	4.57199e-06	8.69871e-05
TRIM5	CD14+ Monocyte	1.11675	4.90579	25.8572	4.71097e-06	8.89783e-05
LRPPRC	CD14+ Monocyte	-0.685565	5.38889	25.8475	4.71731e-06	8.89783e-05
MT-ND2	CD14+ Monocyte	-0.677994	11.7655	25.801	4.79121e-06	9.01132e-05
LAIR1	CD14+ Monocyte	0.751484	6.21228	25.7736	4.83881e-06	9.07484e-05
POLR2F	CD14+ Monocyte	0.500251	5.89146	25.7524	4.87536e-06	9.11734e-05
DDAH2	CD14+ Monocyte	0.609076	5.43033	25.7214	4.93027e-06	9.19384e-05
CMTM3	CD14+ Monocyte	-0.738137	6.1009	25.7012	4.96323e-06	9.2282e-05
RPS6KA3	CD14+ Monocyte	-0.561519	6.88886	25.689	4.98399e-06	9.2282e-05
CD63	CD14+ Monocyte	0.820932	8.77981	25.6847	4.99088e-06	9.2282e-05
RPL27A	CD14+ Monocyte	-0.554825	10.4113	25.6509	5.05058e-06	9.31236e-05
TRIM14	CD14+ Monocyte	1.13835	5.6633	25.4153	5.49224e-06	0.000100421
CTSA	CD14+ Monocyte	0.76251	7.22385	25.4025	5.51251e-06	0.000100511
TRIM26	CD14+ Monocyte	0.611332	5.0579	25.3829	5.55861e-06	0.000101071
LSM4	CD14+ Monocyte	-0.611929	6.16437	25.3557	5.60496e-06	0.000101632
SSB	CD14+ Monocyte	0.768664	7.39001	25.3319	5.65158e-06	0.000102014
SLFN5	CD14+ Monocyte	1.90071	6.30975	25.3309	5.65707e-06	0.000102014
IFIT2	CD14+ Monocyte	3.07774	7.36437	25.2275	5.86531e-06	0.000105479
PTRHD1	CD14+ Monocyte	-0.54463	5.91055	25.1882	5.94723e-06	0.00010656
MFAP1	CD14+ Monocyte	0.712164	4.35853	25.1943	5.95785e-06	0.00010656
MT-ATP6	CD14+ Monocyte	-0.776109	12.7287	25.1236	6.08294e-06	0.000108207
RNF213	CD14+ Monocyte	1.01922	8.90489	25.0291	6.29012e-06	0.000110693
AC009950.1	CD14+ Monocyte	1.23385	4.94267	25.0099	6.34643e-06	0.000111385
MFNG	CD14+ Monocyte	-0.529821	5.58368	24.8584	6.6854e-06	0.000116093
NAP1L1	CD14+ Monocyte	-0.780132	8.34649	24.8051	6.81078e-06	0.000117325
BLVRA	CD14+ Monocyte	0.94221	7.38578	24.8037	6.81467e-06	0.000117325
MT1X	CD14+ Monocyte	1.26015	5.51946	24.7567	6.93659e-06	0.000118882
SNRNP35	CD14+ Monocyte	0.533812	4.64736	24.7518	6.95851e-06	0.000118947
SP140	CD14+ Monocyte	1.53459	4.11746	24.704	7.10048e-06	0.000121059
RUBCN	CD14+ Monocyte	0.548137	4.8179	24.6528	7.20759e-06	0.000122566
IRF2	CD14+ Monocyte	0.557892	6.5058	24.6223	7.27035e-06	0.000123314
H1F0	CD14+ Monocyte	1.71094	5.47347	24.5031	7.60236e-06	0.000128283
TMEM123	CD14+ Monocyte	0.98713	8.51905	24.458	7.7081e-06	0.000129733
IL13RA1	CD14+ Monocyte	-0.876288	6.41803	24.3883	7.90384e-06	0.000132687
PATL1	CD14+ Monocyte	0.722098	5.26307	24.3708	7.96202e-06	0.000132984
PRMT1	CD14+ Monocyte	-0.545483	5.20677	24.3398	8.04526e-06	0.000134033
ETV7	CD14+ Monocyte	3.40962	3.70526	24.2296	8.32304e-06	0.000137613
HNRNPA1	CD14+ Monocyte	-0.506016	8.65948	24.2265	8.3736e-06	0.000137755
VDR	CD14+ Monocyte	0.729141	4.36556	24.2003	8.48344e-06	0.000138866
MGME1	CD14+ Monocyte	0.622801	4.59109	24.1908	8.50996e-06	0.000138954
HIST1H2AC	CD14+ Monocyte	1.51336	4.23507	24.1729	8.57996e-06	0.000139452
SQOR	CD14+ Monocyte	0.6568	7.05988	24.1579	8.58298e-06	0.000139452
NPM1	CD14+ Monocyte	-0.691383	7.96533	24.0387	8.95772e-06	0.000144824
SCO2	CD14+ Monocyte	1.22206	7.95016	23.9506	9.24628e-06	0.000149122
WSB1	CD14+ Monocyte	0.601251	8.46684	23.8802	9.48357e-06	0.000151507
RAB3D	CD14+ Monocyte	-0.562849	6.37107	23.8798	9.48648e-06	0.000151507
NEDD9	CD14+ Monocyte	-0.749142	5.62149	23.7816	9.83114e-06	0.000155873
HSPD1	CD14+ Monocyte	-0.652313	6.46375	23.7154	1.00656e-05	0.000159207
IGFBP7	CD14+ Monocyte	0.656839	5.41725	23.6038	1.04854e-05	0.000164809
LINC-PINT	CD14+ Monocyte	-0.60528	5.69494	23.6004	1.04951e-05	0.000164809
NDUFAF8	CD14+ Monocyte	-0.688104	5.16515	23.5857	1.05539e-05	0.000165336
VENTX	CD14+ Monocyte	-1.2088	4.09115	23.5806	1.06156e-05	0.000165907
IVNS1ABP	CD14+ Monocyte	-0.738842	6.86803	23.5405	1.07221e-05	0.000167173
CARD6	CD14+ Monocyte	0.668112	4.91626	23.4424	1.11437e-05	0.000172111
NAT9	CD14+ Monocyte	-0.873554	4.23102	23.4292	1.11861e-05	0.00017236
SWAP70	CD14+ Monocyte	0.713548	5.32576	23.4177	1.12209e-05	0.000172492
LMO2	CD14+ Monocyte	0.569669	7.61703	23.2118	1.20801e-05	0.000185266
TSPAN3	CD14+ Monocyte	-0.510638	4.51632	23.1702	1.22934e-05	0.000187661
IFI27L2	CD14+ Monocyte	0.633688	6.73028	23.1239	1.24737e-05	0.000188522
SMDT1	CD14+ Monocyte	-0.677087	7.043	23.035	1.28837e-05	0.000193702
C4orf33	CD14+ Monocyte	0.66547	5.12489	23.0351	1.28958e-05	0.000193702
FBXO6	CD14+ Monocyte	1.14429	5.04088	22.9146	1.34766e-05	0.000201047
SAMD4A	CD14+ Monocyte	1.81705	5.13592	22.8937	1.35804e-05	0.000201679
SNCA	CD14+ Monocyte	-1.00581	3.63971	22.8644	1.37878e-05	0.000203835
TNFSF10	CD14+ Monocyte	1.48092	8.91803	22.8387	1.38403e-05	0.000204153
PARP14	CD14+ Monocyte	1.48713	8.42973	22.8142	1.39656e-05	0.000205137
CLU	CD14+ Monocyte	4.95192	6.00073	22.454	1.39696e-05	0.000205137
NME2	CD14+ Monocyte	-0.519841	8.52719	22.7906	1.40864e-05	0.000205676
DDB1	CD14+ Monocyte	-0.535315	5.40502	22.7895	1.40993e-05	0.000205676
SUN1	CD14+ Monocyte	-0.56202	4.65387	22.7927	1.41002e-05	0.000205676
HIST1H1C	CD14+ Monocyte	1.69619	5.53147	22.6985	1.46006e-05	0.000211097
RTCB	CD14+ Monocyte	0.856911	5.98049	22.6443	1.48664e-05	0.000213998
MITD1	CD14+ Monocyte	0.510229	5.40287	22.63	1.49481e-05	0.000214704
MLEC	CD14+ Monocyte	-0.716369	5.64912	22.5899	1.51669e-05	0.000216897
INSR	CD14+ Monocyte	-0.598769	5.17917	22.4741	1.58353e-05	0.000225936
PCNT	CD14+ Monocyte	-0.635775	4.26054	22.3994	1.63085e-05	0.000231208
TYMP	CD14+ Monocyte	0.966122	10.5959	22.3038	1.68439e-05	0.00023777
RAB4A	CD14+ Monocyte	-0.656626	5.37096	22.2898	1.6939e-05	0.000238089
CD2AP	CD14+ Monocyte	1.13494	5.11369	22.2728	1.70629e-05	0.000239318
CHP1	CD14+ Monocyte	-0.542629	6.65812	22.2217	1.7363e-05	0.000243008
AMFR	CD14+ Monocyte	-0.637364	5.05176	22.1898	1.75849e-05	0.000245069
FLVCR2	CD14+ Monocyte	0.898616	4.43854	22.1867	1.76542e-05	0.000245513
FPR2	CD14+ Monocyte	1.42839	5.81774	22.1093	1.81084e-05	0.000249513
CYSTM1	CD14+ Monocyte	0.948778	5.40591	21.9899	1.89259e-05	0.00025966
SLC9A3R1	CD14+ Monocyte	-0.685649	5.78744	21.9519	1.91889e-05	0.000261862
SRA1	CD14+ Monocyte	0.515251	6.37692	21.9107	1.94808e-05	0.000264745
APEX1	CD14+ Monocyte	-0.920813	6.02051	21.8389	2.00073e-05	0.000270779
CTSD	CD14+ Monocyte	0.790795	9.25541	21.7234	2.08808e-05	0.00028029
TOR1A	CD14+ Monocyte	0.503889	5.21711	21.7151	2.09588e-05	0.000280763
RNASEL	CD14+ Monocyte	0.774982	4.04992	21.7102	2.10572e-05	0.000281507
CD82	CD14+ Monocyte	1.24537	4.53461	21.6662	2.13968e-05	0.000285465
RELL1	CD14+ Monocyte	-0.866282	5.49197	21.5633	2.21716e-05	0.000293279
HSPA6	CD14+ Monocyte	1.21431	5.31135	21.5286	2.24844e-05	0.000295467
NAPA	CD14+ Monocyte	0.830668	6.56564	21.5231	2.25001e-05	0.000295467
DST	CD14+ Monocyte	-1.35223	4.6269	21.5262	2.25066e-05	0.000295467
AHCY	CD14+ Monocyte	-0.730595	4.02388	21.4962	2.27843e-05	0.000298515
AC010642.2	CD14+ Monocyte	-1.07665	4.06011	21.4825	2.29124e-05	0.000299596
PNN	CD14+ Monocyte	-0.510435	6.95494	21.3925	2.36227e-05	0.000307658
EXOC6	CD14+ Monocyte	0.671986	5.43524	21.3528	2.39959e-05	0.000311096
MTHFD2	CD14+ Monocyte	0.793433	6.1679	21.3485	2.40184e-05	0.000311096
LILRB1	CD14+ Monocyte	1.11481	7.37681	21.3447	2.40485e-05	0.000311096
SMIM30	CD14+ Monocyte	0.689499	5.19269	21.2035	2.53762e-05	0.00032533
RPS27L	CD14+ Monocyte	0.736972	7.07544	21.1861	2.5519e-05	0.000326524
MT-ND4	CD14+ Monocyte	-0.700554	12.3471	21.1353	2.60083e-05	0.000330546
AKR1B1	CD14+ Monocyte	-1.20486	4.15053	21.1401	2.60348e-05	0.000330546
MAP4K5	CD14+ Monocyte	-0.587721	4.21676	21.1328	2.61165e-05	0.000330943
MILR1	CD14+ Monocyte	0.759172	4.68872	20.9244	2.81948e-05	0.000353188
STXBP2	CD14+ Monocyte	0.767547	8.93199	20.8927	2.84899e-05	0.000356205
STAT2	CD14+ Monocyte	1.04097	7.32921	20.8779	2.86514e-05	0.000356865
STX17	CD14+ Monocyte	0.651466	4.93132	20.8189	2.93385e-05	0.000364071
SASH3	CD14+ Monocyte	0.50361	6.30039	20.8151	2.93409e-05	0.000364071
SERPINA1	CD14+ Monocyte	0.758872	9.47207	20.7648	2.98973e-05	0.000369493
MT-ND1	CD14+ Monocyte	-0.609352	12.3851	20.7604	2.99467e-05	0.000369493
PNPT1	CD14+ Monocyte	1.21458	5.37225	20.7299	3.03269e-05	0.000373482
GNG2	CD14+ Monocyte	-0.972115	5.52594	20.7072	3.05644e-05	0.000374999
PEBP1	CD14+ Monocyte	-0.883973	5.21078	20.6892	3.07775e-05	0.00037691
B2M	CD14+ Monocyte	0.617754	13.3102	20.6531	3.11843e-05	0.00038118
CYSLTR1	CD14+ Monocyte	0.796332	5.82651	20.6023	3.1801e-05	0.000387996
MCRIP2	CD14+ Monocyte	-0.764651	4.94257	20.5912	3.19418e-05	0.00038899
IL15RA	CD14+ Monocyte	1.00671	3.76726	20.519	3.29542e-05	0.000399836
MSRB1	CD14+ Monocyte	0.65351	7.25386	20.4256	3.39904e-05	0.000409381
TBC1D9	CD14+ Monocyte	-0.976135	5.74104	20.3684	3.47441e-05	0.000416889
SELL	CD14+ Monocyte	0.92265	8.82976	20.3642	3.47896e-05	0.000416889
MRPL44	CD14+ Monocyte	0.689051	4.9076	20.3199	3.54313e-05	0.000422857
TOB2	CD14+ Monocyte	-0.554153	5.04409	20.2955	3.57347e-05	0.000425703
RPS12	CD14+ Monocyte	-0.502345	11.5766	20.2729	3.60168e-05	0.000427641
ZNF487	CD14+ Monocyte	-0.618531	4.21934	20.277	3.60277e-05	0.000427641
PLEK	CD14+ Monocyte	0.672035	8.68913	20.251	3.63177e-05	0.000430306
AHR	CD14+ Monocyte	-0.598323	7.9323	20.2021	3.70003e-05	0.000437603
BST2	CD14+ Monocyte	0.891894	8.3719	20.1685	3.74748e-05	0.000441614
AC100810.1	CD14+ Monocyte	-0.788975	4.40771	20.0893	3.86855e-05	0.000452641
ADPRH	CD14+ Monocyte	0.702853	4.03395	20.0825	3.88717e-05	0.000454011
FCGR1B	CD14+ Monocyte	1.505	5.66212	20.0453	3.9294e-05	0.000458128
TCF7L2	CD14+ Monocyte	0.983672	6.29934	20.0279	3.95445e-05	0.000459801
ISCA1	CD14+ Monocyte	-0.51238	4.76133	20.0277	3.95777e-05	0.000459801
AGO1	CD14+ Monocyte	-0.584769	5.66388	20.0034	3.99229e-05	0.000462177
GPR155	CD14+ Monocyte	-0.88489	4.97381	19.9975	4.00375e-05	0.000462687
IRS2	CD14+ Monocyte	-1.23603	7.42481	19.9864	4.01705e-05	0.000463408
C3AR1	CD14+ Monocyte	1.34042	6.7662	19.948	4.07668e-05	0.00046864
B3GALT4	CD14+ Monocyte	0.676567	4.25363	19.8504	4.24285e-05	0.000484236
GBP1	CD14+ Monocyte	2.81411	7.01677	19.8395	4.24923e-05	0.000484236
CDC42EP2	CD14+ Monocyte	1.01	4.3033	19.7679	4.37721e-05	0.00049538
RRBP1	CD14+ Monocyte	0.526081	6.64368	19.7317	4.4283e-05	0.000499439
MRE11	CD14+ Monocyte	-0.515559	4.80238	19.7081	4.47446e-05	0.00050378
TRAPPC6A	CD14+ Monocyte	-0.843346	4.77099	19.6983	4.48814e-05	0.000504454
RPL36A	CD14+ Monocyte	-0.550538	10.1805	19.6465	4.57485e-05	0.000512446
MOV10	CD14+ Monocyte	1.25025	4.00385	19.6167	4.64648e-05	0.000518698
CPNE2	CD14+ Monocyte	-0.614413	4.13304	19.5774	4.7092e-05	0.000524808
HLA-B	CD14+ Monocyte	0.529973	11.6859	19.5484	4.7504e-05	0.000528502
HSP90AB1	CD14+ Monocyte	-0.653635	8.28529	19.5199	4.80281e-05	0.000533175
PIM3	CD14+ Monocyte	0.863321	6.99418	19.5095	4.82237e-05	0.000533795
COA6	CD14+ Monocyte	0.65496	5.75613	19.5043	4.83322e-05	0.000534095
LEPROTL1	CD14+ Monocyte	0.598263	6.78781	19.4003	5.02932e-05	0.000550208
SLC9A1	CD14+ Monocyte	0.50435	4.09941	19.3875	5.07066e-05	0.000552887
CEP85L	CD14+ Monocyte	-0.77322	5.78943	19.3591	5.11094e-05	0.000556355
JAK3	CD14+ Monocyte	1.0301	5.78159	19.3096	5.21118e-05	0.000566327
ABCE1	CD14+ Monocyte	-0.872882	5.01689	19.3012	5.22869e-05	0.000567012
MRPL17	CD14+ Monocyte	0.676647	4.20436	19.3028	5.23781e-05	0.000567012
ITPRIPL2	CD14+ Monocyte	-0.506521	5.52336	19.2933	5.24339e-05	0.000567012
TOB1	CD14+ Monocyte	-0.695361	6.3052	19.2135	5.40535e-05	0.000580651
HK3	CD14+ Monocyte	0.580245	6.06928	19.1943	5.446e-05	0.000583157
SND1	CD14+ Monocyte	-0.571041	5.80903	19.1706	5.4962e-05	0.000585666
PARP11	CD14+ Monocyte	0.823742	4.2875	19.1378	5.58158e-05	0.000593801
ITGB7	CD14+ Monocyte	1.25645	4.22971	19.0667	5.73613e-05	0.000608204
AAGAB	CD14+ Monocyte	0.520459	4.26513	19.0036	5.87953e-05	0.000621469
TRAFD1	CD14+ Monocyte	0.71172	5.1345	18.9389	6.01726e-05	0.00063297
SULF2	CD14+ Monocyte	-0.802992	6.95541	18.9104	6.07814e-05	0.000637055
SMCHD1	CD14+ Monocyte	0.678148	8.53453	18.9073	6.08521e-05	0.000637055
IL1RN	CD14+ Monocyte	1.2973	6.45491	18.8866	6.13498e-05	0.000641242
ATP2B1	CD14+ Monocyte	-0.943387	8.16177	18.8711	6.1714e-05	0.000644024
S100A8	CD14+ Monocyte	1.15016	13.7227	18.8042	6.33367e-05	0.000659908
SRSF8	CD14+ Monocyte	-0.96047	3.9974	18.8013	6.35996e-05	0.000661597
ST3GAL5	CD14+ Monocyte	0.837948	6.03851	18.7864	6.37934e-05	0.000662563
HCFC1R1	CD14+ Monocyte	0.593554	4.82423	18.7806	6.39963e-05	0.00066362
UBA7	CD14+ Monocyte	0.68481	4.9574	18.7749	6.41218e-05	0.000663873
TTC19	CD14+ Monocyte	-0.545638	5.05925	18.747	6.47973e-05	0.00066981
ERLIN2	CD14+ Monocyte	0.5186	4.74043	18.6561	6.72131e-05	0.000690433
RIN2	CD14+ Monocyte	0.581697	5.76684	18.6405	6.75388e-05	0.000692694
ZNF609	CD14+ Monocyte	-0.527869	4.93745	18.6204	6.81003e-05	0.000695195
IL2RG	CD14+ Monocyte	1.22727	5.77235	18.5681	6.94624e-05	0.000706901
BLZF1	CD14+ Monocyte	0.69033	4.41065	18.5616	6.97989e-05	0.000709226
REPIN1	CD14+ Monocyte	-0.678974	4.82622	18.4477	7.28405e-05	0.00073671
DDB2	CD14+ Monocyte	1.2173	3.83943	18.4475	7.30829e-05	0.000738025
NLN	CD14+ Monocyte	-0.646831	4.77778	18.4034	7.4178e-05	0.000744502
CNIH4	CD14+ Monocyte	0.922068	6.30516	18.3823	7.46801e-05	0.000748397
SNHG16	CD14+ Monocyte	-0.601606	5.6535	18.3525	7.55636e-05	0.000756097
DOK1	CD14+ Monocyte	0.5091	4.96264	18.3375	7.60541e-05	0.000758691
NLRC4	CD14+ Monocyte	0.631849	5.14156	18.3063	7.70183e-05	0.000765982
C1GALT1C1	CD14+ Monocyte	0.598647	4.36808	18.2955	7.7403e-05	0.000768644
CD300A	CD14+ Monocyte	0.618448	6.62875	18.2427	7.88743e-05	0.000780891
PAFAH1B3	CD14+ Monocyte	0.562094	3.9698	18.2031	8.03447e-05	0.000791866
IDS	CD14+ Monocyte	-0.558476	7.4998	18.155	8.16337e-05	0.000803364
MRPS6	CD14+ Monocyte	-0.68422	5.26945	18.1251	8.2625e-05	0.000810689
PLCB1	CD14+ Monocyte	-1.05096	5.12034	18.063	8.4682e-05	0.000827161
CPVL	CD14+ Monocyte	-0.629669	8.64233	18.0096	8.64368e-05	0.000838067
HLA-A	CD14+ Monocyte	0.760866	11.1506	17.8988	9.02957e-05	0.000869063
NAGK	CD14+ Monocyte	0.631613	7.83148	17.8432	9.2301e-05	0.000883135
GIMAP5	CD14+ Monocyte	1.34264	4.6727	17.8465	9.2404e-05	0.000883135
GTPBP2	CD14+ Monocyte	0.696715	4.48245	17.8161	9.35246e-05	0.000890995
PHF23	CD14+ Monocyte	0.535483	4.50644	17.7225	9.70365e-05	0.000919116
APOBEC3C	CD14+ Monocyte	0.579173	5.6391	17.7039	9.75538e-05	0.000922685
SIGLEC10	CD14+ Monocyte	0.803362	5.57071	17.579	0.00010252	0.000965485
TNFRSF10A	CD14+ Monocyte	0.69317	3.82551	17.5786	0.000102808	0.000966811
FFAR2	CD14+ Monocyte	1.7206	5.82316	17.5669	0.000103004	0.000967269
TTC9C	CD14+ Monocyte	0.688317	4.278	17.5582	0.000103579	0.000971278
OPTN	CD14+ Monocyte	1.87502	3.48848	17.5299	0.000104986	0.000981063
APRT	CD14+ Monocyte	-0.519131	7.63374	17.4596	0.000107446	0.00100039
ACOT13	CD14+ Monocyte	0.650272	3.98326	17.4601	0.00010773	0.00100161
MT-CO2	CD14+ Monocyte	-0.539434	13.0394	17.3841	0.000110722	0.00102797
PTGER4	CD14+ Monocyte	-0.671014	6.38685	17.3604	0.000111783	0.0010349
CCL2	CD14+ Monocyte	4.16343	4.61651	17.3528	0.00011231	0.00103831
BRI3BP	CD14+ Monocyte	-0.668831	5.07545	17.3326	0.000113089	0.00104404
MYADM	CD14+ Monocyte	-0.535833	9.06274	17.3269	0.000113271	0.00104426
CD44	CD14+ Monocyte	-0.584074	9.76877	17.3105	0.00011401	0.00104813
NUCB1	CD14+ Monocyte	0.542392	6.63287	17.2438	0.00011709	0.00106939
H1FX	CD14+ Monocyte	0.618349	7.97881	17.2427	0.000117138	0.00106939
BATF	CD14+ Monocyte	0.863002	4.13655	17.2207	0.000118481	0.00108015
AC015871.7	CD14+ Monocyte	-0.811168	4.24565	17.082	0.000125141	0.001133
ALDH1A1	CD14+ Monocyte	-1.40541	5.83073	17.0123	0.00012846	0.0011535
KDSR	CD14+ Monocyte	-0.725112	4.45898	17.0006	0.000129191	0.00115849
UBE2L6	CD14+ Monocyte	1.21487	7.32047	16.9508	0.00013164	0.00117468
FAM8A1	CD14+ Monocyte	0.721053	4.68153	16.9397	0.000132457	0.00117536
GPD2	CD14+ Monocyte	0.746295	5.02371	16.9371	0.000132505	0.00117536
FRMD4B	CD14+ Monocyte	-0.687335	5.09847	16.9286	0.000132878	0.00117707
FAS	CD14+ Monocyte	0.824874	4.7833	16.8731	0.000135982	0.0011981
AP5B1	CD14+ Monocyte	0.502005	6.62702	16.8297	0.000138198	0.00121274
ALDH2	CD14+ Monocyte	-0.539172	8.07206	16.7925	0.000140268	0.00122436
LACC1	CD14+ Monocyte	0.700147	4.45066	16.6796	0.000147055	0.00127387
NFE2	CD14+ Monocyte	0.731549	6.38053	16.6726	0.000147224	0.00127387
NTNG2	CD14+ Monocyte	0.999419	3.95789	16.6296	0.000150167	0.00129504
RTN1	CD14+ Monocyte	-1.26652	4.94757	16.6011	0.000151615	0.00130262
ITGAE	CD14+ Monocyte	-0.701965	5.24507	16.5637	0.000153857	0.00131843
TENT5A	CD14+ Monocyte	0.68211	6.35091	16.3924	0.000164846	0.001395
NKG7	CD14+ Monocyte	2.18849	5.72408	16.3905	0.00016513	0.001395
GIMAP7	CD14+ Monocyte	1.09365	7.67068	16.369	0.000166392	0.00140354
RPS10	CD14+ Monocyte	-0.64263	8.77113	16.3393	0.000168401	0.00141572
CGAS	CD14+ Monocyte	0.706506	5.60895	16.3381	0.000168559	0.00141572
MARCO	CD14+ Monocyte	1.37692	5.53828	16.3361	0.000168684	0.00141572
HMGA1	CD14+ Monocyte	-0.54338	5.54477	16.3236	0.000169513	0.00141924
GSDMD	CD14+ Monocyte	0.680321	6.10644	16.27	0.000173217	0.00144472
SECTM1	CD14+ Monocyte	0.755532	6.83036	16.2015	0.000178086	0.00147248
GCH1	CD14+ Monocyte	0.89766	6.40239	16.1718	0.00018025	0.00148638
GNPDA1	CD14+ Monocyte	0.539353	4.92309	16.1038	0.000185483	0.00152189
SCARB2	CD14+ Monocyte	0.560705	6.52134	16.0823	0.000186928	0.00152801
AL121933.2	CD14+ Monocyte	0.616037	4.81148	16.0462	0.000189805	0.0015496
MRPL46	CD14+ Monocyte	0.696146	3.77722	16.0357	0.000191028	0.00155765
SNHG9	CD14+ Monocyte	-0.502951	4.37169	16.0031	0.00019332	0.00157438
MRPS18A	CD14+ Monocyte	0.552802	4.2556	15.916	0.000200459	0.0016305
SIGLEC7	CD14+ Monocyte	0.578061	5.12805	15.9006	0.000201433	0.00163639
MAT2A	CD14+ Monocyte	-0.574822	6.16685	15.881	0.000202905	0.00164484
RGCC	CD14+ Monocyte	-1.18095	6.32173	15.8778	0.00020318	0.00164484
SLC16A6	CD14+ Monocyte	0.624004	5.47305	15.8537	0.000205258	0.00165925
AP1S1	CD14+ Monocyte	0.513869	4.51708	15.7538	0.000213945	0.001721
MBNL2	CD14+ Monocyte	-0.82967	4.41776	15.7512	0.000214296	0.00172171
MICB	CD14+ Monocyte	0.828985	4.20653	15.7481	0.00021472	0.00172301
MT-ND3	CD14+ Monocyte	-0.661224	12.5197	15.7209	0.000216605	0.00173389
CD79B	CD14+ Monocyte	0.918746	3.85472	15.7222	0.000217098	0.00173415
ARHGAP18	CD14+ Monocyte	0.546667	5.26118	15.7032	0.00021834	0.00174134
EXOSC9	CD14+ Monocyte	0.661485	4.60629	15.5797	0.000229861	0.00182444
CCR1	CD14+ Monocyte	0.89669	7.55362	15.5675	0.000230665	0.00182806
AC005280.2	CD14+ Monocyte	-0.842148	4.1431	15.5624	0.000231502	0.00182969
STAT1	CD14+ Monocyte	1.3219	8.0185	15.5153	0.000235655	0.0018525
PLAGL2	CD14+ Monocyte	0.709555	5.52236	15.5019	0.000237027	0.00186106
FAM20A	CD14+ Monocyte	3.28825	3.88415	15.3407	0.000238027	0.00186445
HES4	CD14+ Monocyte	1.90485	4.79655	15.4463	0.00024324	0.00189849
SLC27A3	CD14+ Monocyte	0.536278	5.91596	15.3949	0.000247639	0.00192595
LILRB4	CD14+ Monocyte	0.783159	6.65422	15.2767	0.000259981	0.00200315
HEG1	CD14+ Monocyte	1.2598	3.65165	15.261	0.000262305	0.00201142
GIMAP1	CD14+ Monocyte	0.609184	6.91163	15.251	0.000262754	0.00201251
GAS6	CD14+ Monocyte	1.12685	4.2533	15.1595	0.000273367	0.00207203
GBA	CD14+ Monocyte	0.533241	4.66506	15.1289	0.000276733	0.0020879
FOXO1	CD14+ Monocyte	-0.767533	4.58161	15.069	0.000283534	0.00213431
FBXO22	CD14+ Monocyte	0.557606	4.05829	15.0432	0.000287031	0.00215569
HERPUD1	CD14+ Monocyte	-0.551507	7.63304	15.0285	0.000288057	0.00216092
NPL	CD14+ Monocyte	0.535053	5.95566	15.0022	0.000291258	0.00218244
SGK1	CD14+ Monocyte	-0.874488	7.76037	14.9777	0.000294184	0.00219934
AC118549.1	CD14+ Monocyte	-0.538139	4.23512	14.9721	0.000295428	0.00220613
TRIO	CD14+ Monocyte	-0.518885	5.04771	14.9468	0.000298143	0.00221883
MT-ATP8	CD14+ Monocyte	-0.783608	7.08393	14.8873	0.000305431	0.00226537
LDHB	CD14+ Monocyte	-0.772817	6.08245	14.8534	0.000309792	0.00228837
PARP10	CD14+ Monocyte	0.8644	4.84095	14.815	0.000314946	0.00232021
AIM2	CD14+ Monocyte	1.77137	3.99528	14.7736	0.000321232	0.00235858
RETN	CD14+ Monocyte	1.57009	8.23681	14.746	0.000323911	0.00237294
ADM	CD14+ Monocyte	1.32971	4.93053	14.6622	0.000335702	0.00244296
UBASH3B	CD14+ Monocyte	0.857327	4.19758	14.5499	0.000352295	0.00254957
CHRAC1	CD14+ Monocyte	-0.575345	5.74001	14.4907	0.00036038	0.00259949
AC091271.1	CD14+ Monocyte	0.827055	4.53989	14.4852	0.000361607	0.00260547
TMX4	CD14+ Monocyte	-0.569551	6.36673	14.3876	0.000376236	0.00269314
SRM	CD14+ Monocyte	-0.596744	5.02382	14.3706	0.000379026	0.00270721
CHROMR	CD14+ Monocyte	0.90175	4.01969	14.336	0.000385193	0.00273745
ABHD14B	CD14+ Monocyte	-0.580344	4.28827	14.1934	0.000408612	0.00287166
HIST1H1D	CD14+ Monocyte	1.10168	5.01373	14.1675	0.000413198	0.00290078
MCTP2	CD14+ Monocyte	1.95362	4.37848	14.1292	0.000414756	0.00290551
CIITA	CD14+ Monocyte	-0.844383	5.94593	14.0488	0.000433861	0.00301361
SLC27A1	CD14+ Monocyte	-0.610503	4.17742	14.0164	0.000440422	0.00305272
CUL1	CD14+ Monocyte	0.977548	6.3082	14.007	0.000441565	0.0030542
A1BG	CD14+ Monocyte	-0.965698	4.56496	13.9875	0.000445606	0.00307567
LYRM4	CD14+ Monocyte	-0.557815	4.06672	13.9836	0.000446522	0.00307875
HLA-DMB	CD14+ Monocyte	-0.763169	7.52596	13.8513	0.000471541	0.00321079
TOMM40	CD14+ Monocyte	-0.620119	4.26396	13.8297	0.000476325	0.00323664
REEP4	CD14+ Monocyte	0.514795	4.92382	13.8184	0.000478432	0.0032476
ANKRD22	CD14+ Monocyte	2.54542	4.44455	13.6983	0.000503978	0.00340341
CYB5A	CD14+ Monocyte	0.672344	4.32273	13.6855	0.000506634	0.00341432
SLC25A33	CD14+ Monocyte	-0.641825	4.26514	13.6795	0.000507782	0.00341561
ELMO2	CD14+ Monocyte	0.714498	3.95676	13.6813	0.000507867	0.00341561
HMOX1	CD14+ Monocyte	0.622099	6.81646	13.6439	0.000514912	0.00345238
JMY	CD14+ Monocyte	-0.543647	4.17527	13.6176	0.000521399	0.00349231
BTN3A1	CD14+ Monocyte	0.704363	4.92047	13.6104	0.000522625	0.00349696
EXOSC4	CD14+ Monocyte	0.586824	3.84048	13.6055	0.000524458	0.00350564
LIMK2	CD14+ Monocyte	0.954298	4.24428	13.5621	0.000533823	0.00356099
PPP1R14B	CD14+ Monocyte	-0.528785	5.92156	13.4894	0.000549914	0.0036454
IRF2BPL	CD14+ Monocyte	0.64651	5.12027	13.489	0.000550365	0.0036454
AQP9	CD14+ Monocyte	1.25184	6.15573	13.4689	0.000554754	0.00366708
TBL1X	CD14+ Monocyte	-0.523707	5.94674	13.3777	0.000576764	0.00375956
DHRS4L2	CD14+ Monocyte	-0.5065	5.7511	13.3553	0.000582313	0.00378446
SH2D3C	CD14+ Monocyte	0.525015	5.31614	13.3207	0.000591089	0.00382634
EZH1	CD14+ Monocyte	-0.501251	4.91791	13.2653	0.000605425	0.00388087
PSMB9	CD14+ Monocyte	0.973686	8.16166	13.2578	0.000607024	0.00388444
MASTL	CD14+ Monocyte	0.574448	3.86022	13.2625	0.000607166	0.00388444
NR4A2	CD14+ Monocyte	-0.824643	7.65247	13.222	0.000616417	0.00393596
IGF1R	CD14+ Monocyte	-0.729333	4.10868	13.1822	0.000628098	0.00399113
CCND3	CD14+ Monocyte	0.545209	7.12721	13.066	0.000659054	0.00415166
PTPA	CD14+ Monocyte	0.534916	4.69372	12.9364	0.000697362	0.00438037
DTD1	CD14+ Monocyte	-0.605958	4.10044	12.9261	0.000700734	0.00438476
LILRA5	CD14+ Monocyte	0.652255	7.52775	12.8287	0.000729934	0.0045309
TNFAIP6	CD14+ Monocyte	1.67113	4.04367	12.7802	0.000745612	0.00459203
CCRL2	CD14+ Monocyte	0.732558	3.48744	12.7068	0.000769812	0.00473132
ECI2	CD14+ Monocyte	-0.589368	4.10471	12.6779	0.000780021	0.00478063
PI4K2B	CD14+ Monocyte	0.77491	3.95046	12.673	0.000782204	0.00478954
TGFBR1	CD14+ Monocyte	-0.544577	4.88538	12.5968	0.000807337	0.00490357
SFXN5	CD14+ Monocyte	-0.591437	4.56373	12.5799	0.000813564	0.00493096
ABI3	CD14+ Monocyte	0.669508	6.07833	12.5288	0.000831166	0.00499487
KDM2B	CD14+ Monocyte	-0.517561	4.38737	12.5077	0.000839534	0.00501885
NISCH	CD14+ Monocyte	0.510849	5.06502	12.4574	0.000857716	0.00509046
LAP3	CD14+ Monocyte	1.21172	8.14928	12.3588	0.000894835	0.00527736
CACNA2D3	CD14+ Monocyte	-0.802455	4.51832	12.3434	0.000901428	0.00531147
RPA2	CD14+ Monocyte	-0.578434	4.61405	12.3223	0.000909692	0.00535055
RGS2	CD14+ Monocyte	-0.751024	9.06584	12.2409	0.000942014	0.00552581
TBC1D2	CD14+ Monocyte	0.504178	4.7752	12.2286	0.000947652	0.00554402
SIRPB2	CD14+ Monocyte	-0.576778	5.22704	12.1947	0.00096151	0.00561508
TATDN3	CD14+ Monocyte	0.575581	4.60272	12.191	0.000963618	0.0056174
SLC46A2	CD14+ Monocyte	-0.969146	3.96058	12.1465	0.000983149	0.00571603
S100A9	CD14+ Monocyte	0.666219	14.4822	12.1332	0.00098741	0.00572823
SLFN12	CD14+ Monocyte	0.656205	4.92253	12.1181	0.000994837	0.0057534
SIPA1L2	CD14+ Monocyte	0.767315	4.01655	12.1062	0.00100087	0.00577809
XRN1	CD14+ Monocyte	0.635585	6.69677	12.0921	0.00100538	0.00579903
CCR2	CD14+ Monocyte	0.644857	6.06485	12.0802	0.00101078	0.00581997
GIMAP8	CD14+ Monocyte	0.587806	6.17965	12.0489	0.00102473	0.00589511
ZNF91	CD14+ Monocyte	-0.659593	4.13178	12.021	0.00103859	0.00595396
ATP8B4	CD14+ Monocyte	0.528856	4.61443	11.9598	0.00106649	0.00610326
TGIF1	CD14+ Monocyte	-0.571316	5.17051	11.9297	0.00107978	0.00615786
VRK2	CD14+ Monocyte	0.657162	4.90878	11.8571	0.00111507	0.00632068
CHML	CD14+ Monocyte	-0.607095	4.7195	11.7615	0.00116317	0.0065537
MAD1L1	CD14+ Monocyte	0.801906	5.01719	11.7383	0.00117489	0.00660271
B4GALT5	CD14+ Monocyte	0.71565	5.68485	11.6153	0.00124015	0.00690444
PTGS2	CD14+ Monocyte	-1.41695	6.23777	11.4652	0.00132519	0.00726091
ZDHHC1	CD14+ Monocyte	-1.18581	4.86703	11.4517	0.00133348	0.00729411
SPN	CD14+ Monocyte	-0.597299	6.4687	11.4347	0.0013432	0.00734116
ENG	CD14+ Monocyte	-0.896772	4.4679	11.4027	0.00136305	0.00743111
TAP1	CD14+ Monocyte	0.923495	6.73682	11.365	0.00138542	0.00751562
MAP2K6	CD14+ Monocyte	0.977395	4.747	11.3091	0.00142172	0.00766187
AL442128.2	CD14+ Monocyte	0.772337	3.76442	11.2009	0.00149348	0.00797659
RHOU	CD14+ Monocyte	0.53173	5.00906	11.1611	0.00151773	0.00806704
UPK3A	CD14+ Monocyte	1.00718	4.4966	11.1544	0.00152293	0.0080878
TMEM91	CD14+ Monocyte	-0.536698	5.28822	11.0667	0.00158269	0.008331
LRG1	CD14+ Monocyte	1.09808	4.44549	11.0172	0.00161941	0.00849704
GGCT	CD14+ Monocyte	-0.529015	4.52536	11.0098	0.00162407	0.00851467
SMPDL3A	CD14+ Monocyte	0.501138	4.36623	10.9587	0.00166183	0.00867802
WLS	CD14+ Monocyte	-0.827	4.28419	10.9272	0.001686	0.00878324
UCP2	CD14+ Monocyte	0.617345	7.89627	10.8548	0.00173995	0.00902846
CBR1	CD14+ Monocyte	0.765715	5.60884	10.8374	0.00175378	0.00909305
HPSE	CD14+ Monocyte	0.629536	5.72475	10.7744	0.00180416	0.00930284
SATB1	CD14+ Monocyte	-0.51855	4.90644	10.7604	0.001816	0.00933457
RIN1	CD14+ Monocyte	0.918731	4.60669	10.6819	0.00188215	0.00961538
HSPA1A	CD14+ Monocyte	-0.692115	7.06452	10.6683	0.00189225	0.00963594
NRIP1	CD14+ Monocyte	0.589323	6.52926	10.5944	0.00195645	0.00990907
ABHD5	CD14+ Monocyte	-0.665059	6.97032	10.5749	0.00197374	0.00996611
FPR1	CD14+ Monocyte	0.640392	8.35038	10.5748	0.00197379	0.00996611
ELP2	CD14+ Monocyte	-0.579366	4.61417	10.5703	0.00197892	0.00998227
DIP2A	CD14+ Monocyte	-0.54422	5.21397	10.5671	0.00198126	0.00998227
HCP5	CD14+ Monocyte	0.616346	4.54864	10.5542	0.00199336	0.010023
AC025164.1	CD14+ Monocyte	-0.685887	3.92025	10.5438	0.00200379	0.0100557
MAP3K7CL	CD14+ Monocyte	1.46814	4.65796	10.5248	0.00202067	0.0101231
PIM1	CD14+ Monocyte	0.919664	6.16029	10.4156	0.00212148	0.0105097
BISPR	CD14+ Monocyte	0.667401	4.28644	10.3994	0.00213923	0.0105737
DYSF	CD14+ Monocyte	0.814107	5.92178	10.2076	0.0023318	0.0112757
ATP2A3	CD14+ Monocyte	0.608939	4.16748	10.1817	0.00236198	0.0113523
LDLRAD4	CD14+ Monocyte	-0.569191	4.33863	10.1803	0.00236249	0.0113523
GIMAP2	CD14+ Monocyte	0.528503	6.08712	10.1651	0.00237735	0.0114071
CMKLR1	CD14+ Monocyte	1.15961	3.73422	10.1587	0.00238164	0.0114193
DNASE2	CD14+ Monocyte	0.689073	5.70482	10.125	0.00242133	0.011559
RPS4Y1	CD14+ Monocyte	-0.800356	7.32955	11.5532	0.0024389	0.0116091
DNAJC15	CD14+ Monocyte	0.536437	6.55834	10.0972	0.00245195	0.0116543
AC020916.1	CD14+ Monocyte	-0.552737	9.84322	10.0748	0.00247713	0.0117484
BCL2A1	CD14+ Monocyte	0.957796	7.48797	10.0722	0.00248	0.0117536
GBP3	CD14+ Monocyte	0.888997	4.61888	10.0566	0.00249961	0.0118294
LHFPL2	CD14+ Monocyte	0.845425	4.18912	9.95993	0.00261373	0.0122285
SGMS2	CD14+ Monocyte	-0.737292	5.69513	9.89181	0.00269387	0.012523
C5orf56	CD14+ Monocyte	0.640717	4.44297	9.74648	0.00288129	0.0132021
SLAMF7	CD14+ Monocyte	1.63629	4.29049	9.74639	0.00288218	0.0132021
ARHGEF3	CD14+ Monocyte	0.529144	5.40466	9.73762	0.00289186	0.0132324
MYLIP	CD14+ Monocyte	-0.531371	5.36986	9.61903	0.00305402	0.0137118
TPPP3	CD14+ Monocyte	-1.30727	5.53283	9.35824	0.00344579	0.0152004
STOM	CD14+ Monocyte	0.82474	5.06861	9.35171	0.00345712	0.0152401
PLBD1	CD14+ Monocyte	0.729157	8.58337	9.33769	0.00347851	0.0153138
NR4A3	CD14+ Monocyte	-1.23268	3.34161	9.31806	0.00351763	0.0154446
CDKN1C	CD14+ Monocyte	1.15716	5.04768	9.30672	0.00353042	0.0154904
PID1	CD14+ Monocyte	-1.17193	5.43575	9.24565	0.00363098	0.0158202
PDE4B	CD14+ Monocyte	-0.837985	5.99604	9.21262	0.00368708	0.0160172
CAMK1D	CD14+ Monocyte	-0.919083	5.01823	9.20179	0.00370638	0.0160422
LYSMD2	CD14+ Monocyte	0.512987	6.36887	9.13718	0.00381906	0.0164274
SLC40A1	CD14+ Monocyte	-0.700802	5.29933	9.12823	0.0038357	0.0164882
MYOF	CD14+ Monocyte	0.653013	5.86931	9.09843	0.00388893	0.0166625
PLIN2	CD14+ Monocyte	0.695042	6.28715	9.07228	0.00393664	0.0167875
HSPE1	CD14+ Monocyte	-0.508932	6.13183	8.99248	0.00408637	0.0172467
C1RL	CD14+ Monocyte	0.502619	4.45438	8.96226	0.00414748	0.0174185
LPAR6	CD14+ Monocyte	0.569809	6.18321	8.91708	0.00423357	0.0176888
TNNI2	CD14+ Monocyte	0.542548	4.4459	8.89971	0.00427022	0.0178079
STK32C	CD14+ Monocyte	-0.516141	4.25811	8.86842	0.00433319	0.0180538
UPK3BL1	CD14+ Monocyte	-0.810457	5.03742	8.81198	0.00444831	0.0184565
MIR4435-2HG	CD14+ Monocyte	0.815196	4.35828	8.65446	0.00479302	0.0195594
SPTLC2	CD14+ Monocyte	0.561526	7.39247	8.60588	0.00490156	0.0198726
ADAM8	CD14+ Monocyte	0.51166	6.16546	8.56421	0.00499929	0.0201568
APOL1	CD14+ Monocyte	0.797077	4.13729	8.54384	0.0050516	0.0202941
GABARAPL1	CD14+ Monocyte	-0.62707	7.1387	8.44956	0.00527829	0.021049
LINC01504	CD14+ Monocyte	0.51323	3.7943	8.42252	0.00535195	0.0212524
CASP7	CD14+ Monocyte	0.599009	4.4572	8.40342	0.00539828	0.0213717
SLC25A29	CD14+ Monocyte	-0.722381	3.84786	8.37949	0.00546126	0.021569
ZFP36L2	CD14+ Monocyte	-0.594417	9.54034	8.24002	0.00583173	0.0226104
SFMBT2	CD14+ Monocyte	0.767249	3.77985	8.21961	0.00589266	0.0228063
TMEM14C	CD14+ Monocyte	-0.615809	6.15284	8.18442	0.0059888	0.0230831
CCSAP	CD14+ Monocyte	-0.523862	4.12602	8.08485	0.00628534	0.0239866
RNF125	CD14+ Monocyte	-0.50906	5.6527	8.05721	0.00636512	0.0241646
ICAM2	CD14+ Monocyte	0.582606	5.85446	8.03299	0.00643925	0.0243615
GM2A	CD14+ Monocyte	0.644341	6.21287	7.88905	0.00690049	0.0256628
AC245014.3	CD14+ Monocyte	0.832818	6.52058	7.85868	0.00700228	0.0259239
FCAR	CD14+ Monocyte	-0.57213	6.35018	7.85449	0.00701621	0.0259607
GBP5	CD14+ Monocyte	1.73575	5.56006	7.83874	0.00707022	0.0261121
PIK3IP1	CD14+ Monocyte	-0.829664	4.07811	7.81477	0.00715713	0.0263546
IER3	CD14+ Monocyte	-1.10572	8.01352	7.80794	0.00717537	0.0263611
SHROOM1	CD14+ Monocyte	-0.808025	4.08538	7.77555	0.00729294	0.0266541
ASGR2	CD14+ Monocyte	0.676059	6.05434	7.7702	0.00730771	0.0266636
ABCA1	CD14+ Monocyte	0.863268	4.33015	7.73427	0.00744015	0.0270566
AL499604.1	CD14+ Monocyte	0.524843	4.80814	7.72726	0.00746317	0.0271076
FOSL2	CD14+ Monocyte	-0.504046	6.88395	7.64409	0.00776716	0.0279245
RCAN3	CD14+ Monocyte	-0.527294	4.02752	7.63542	0.00780488	0.0280258
CCZ1B	CD14+ Monocyte	-0.968928	3.77319	7.63121	0.00782304	0.0280757
PIAS2	CD14+ Monocyte	-0.591188	4.48831	7.61976	0.00786345	0.0281591
HDAC9	CD14+ Monocyte	-0.717883	5.58005	7.61016	0.00789657	0.0282315
CYSLTR2	CD14+ Monocyte	-0.840012	3.97582	7.59614	0.00795513	0.028379
VEGFA	CD14+ Monocyte	-0.746694	5.42593	7.55328	0.00811788	0.0288343
EXOSC6	CD14+ Monocyte	-0.57069	5.02704	7.5301	0.00821011	0.0290615
AL133330.1	CD14+ Monocyte	-0.62991	4.95665	7.46265	0.00848481	0.0297752
TCF4	CD14+ Monocyte	0.659313	5.04978	7.46237	0.00848711	0.0297752
RABGAP1L	CD14+ Monocyte	0.514431	7.28937	7.44631	0.00855081	0.0299347
GBP4	CD14+ Monocyte	1.25787	6.12992	7.42331	0.0086475	0.0301445
PSME2	CD14+ Monocyte	0.656279	8.51008	7.39651	0.00876093	0.0303947
AC092944.1	CD14+ Monocyte	0.550745	4.20779	7.39535	0.00877169	0.0303999
PDE3B	CD14+ Monocyte	-0.520761	4.38745	7.33603	0.0090276	0.0311225
LILRA6	CD14+ Monocyte	0.629529	5.8748	7.32254	0.00908393	0.0312594
SCCPDH	CD14+ Monocyte	0.528718	4.52483	7.27642	0.00929339	0.0318381
ST14	CD14+ Monocyte	0.880439	4.60228	7.26226	0.00936003	0.0320222
CHN2	CD14+ Monocyte	-0.508526	4.24781	7.20136	0.00964321	0.0328288
CX3CR1	CD14+ Monocyte	0.841912	7.05347	7.08066	0.0102281	0.0342867
PELI1	CD14+ Monocyte	-0.506459	6.6606	7.07974	0.0102327	0.0342867
LUCAT1	CD14+ Monocyte	-0.909901	6.57007	7.06677	0.0102985	0.0344367
HES1	CD14+ Monocyte	1.03176	6.14236	7.03798	0.010451	0.0348226
TAP2	CD14+ Monocyte	0.59658	5.51791	6.9873	0.0107104	0.0355605
CEACAM4	CD14+ Monocyte	0.64699	4.75284	6.98343	0.0107338	0.0356203
ORAI2	CD14+ Monocyte	-0.503122	5.69894	6.88776	0.0112504	0.0370535
CXCR4	CD14+ Monocyte	-0.975014	7.31805	6.86527	0.0113761	0.0373736
MCEMP1	CD14+ Monocyte	0.681031	6.31304	6.82496	0.0116059	0.0379766
PER1	CD14+ Monocyte	-0.755312	6.28563	6.81929	0.0116385	0.0380455
RAB11FIP4	CD14+ Monocyte	0.513038	4.30303	6.81895	0.0116454	0.038049
FXYD6	CD14+ Monocyte	0.516145	4.33233	6.77203	0.01192	0.0386767
GRASP	CD14+ Monocyte	-1.04367	4.7586	6.75246	0.0120345	0.0388944
TLR7	CD14+ Monocyte	0.755816	5.12836	6.74684	0.0120672	0.0389809
DLEU2	CD14+ Monocyte	0.574272	6.11409	6.69324	0.0123915	0.0397415
NECTIN2	CD14+ Monocyte	0.924026	3.78427	6.68529	0.0124487	0.0398797
STAB1	CD14+ Monocyte	0.531239	6.3167	6.6748	0.0125055	0.0400031
OLIG1	CD14+ Monocyte	-0.710515	5.19717	6.64969	0.012664	0.0403724
SKI	CD14+ Monocyte	-0.527038	4.42914	6.57285	0.0131633	0.0416606
TNNT1	CD14+ Monocyte	1.55916	5.86363	6.53337	0.0134211	0.0422068
ARL4A	CD14+ Monocyte	-0.607893	7.16279	6.5096	0.0135809	0.042592
S100P	CD14+ Monocyte	1.56856	5.39355	6.4573	0.0139466	0.0435724
C15orf48	CD14+ Monocyte	1.51024	4.05195	6.36096	0.0146087	0.0452105
BTN3A3	CD14+ Monocyte	0.567456	4.35613	6.30753	0.0150378	0.0463418
CDKN1A	CD14+ Monocyte	0.574182	7.36096	6.27574	0.0152747	0.0468959
FAM117B	CD14+ Monocyte	-0.509231	4.95949	6.21012	0.0157923	0.04808
NSUN6	CD14+ Monocyte	0.507814	4.2456	6.20714	0.0158198	0.0481416
EPHB2	CD16+ Monocyte	3.88628	3.27764	90.4915	7.97543e-14	5.29967e-10
SIGLEC1	CD16+ Monocyte	6.01928	5.48538	84.8184	3.22488e-13	1.07147e-09
CIR1	CD16+ Monocyte	0.983285	7.1882	82.9121	3.72573e-12	8.25249e-09
EEF1B2	CD16+ Monocyte	-1.60052	9.03515	80.8585	5.50442e-12	9.14422e-09
OASL	CD16+ Monocyte	4.02257	6.53653	70.4607	4.57796e-11	4.69349e-08
RPL5	CD16+ Monocyte	-1.72803	9.7937	69.8204	5.05715e-11	4.69349e-08
ZCCHC2	CD16+ Monocyte	1.36641	5.96269	69.3738	5.60787e-11	4.69349e-08
EEF2	CD16+ Monocyte	-1.18154	8.62114	68.9746	6.04624e-11	4.69349e-08
RPL4	CD16+ Monocyte	-1.45751	9.16493	68.7379	6.35687e-11	4.69349e-08
RPS3A	CD16+ Monocyte	-1.517	10.7397	67.4531	8.36198e-11	4.83551e-08
MT-CYB	CD16+ Monocyte	-1.84138	12.0282	67.2378	8.75786e-11	4.83551e-08
EEF1A1	CD16+ Monocyte	-1.20392	12.4025	67.0703	9.07921e-11	4.83551e-08
IFI44	CD16+ Monocyte	3.48502	6.92878	66.9471	9.46e-11	4.83551e-08
EIF3F	CD16+ Monocyte	-1.13492	7.66041	65.4663	1.2863e-10	6.10532e-08
RPS27A	CD16+ Monocyte	-1.12406	10.9394	64.511	1.58544e-10	6.80759e-08
EIF4B	CD16+ Monocyte	-1.48573	7.24586	64.2289	1.68863e-10	6.80759e-08
EEF1G	CD16+ Monocyte	-1.27078	9.27722	64.0856	1.7416e-10	6.80759e-08
IFI27	CD16+ Monocyte	7.05823	9.32082	63.3248	2.12746e-10	7.85389e-08
RPL3	CD16+ Monocyte	-1.52323	10.1794	62.4683	2.49696e-10	8.73278e-08
XAF1	CD16+ Monocyte	2.3353	8.681	62.1461	2.68569e-10	8.8224e-08
RPL8	CD16+ Monocyte	-0.91817	10.828	61.9779	2.78812e-10	8.8224e-08
EIF3L	CD16+ Monocyte	-1.61311	6.77034	61.6034	3.03831e-10	9.17708e-08
MT1X	CD16+ Monocyte	2.25	4.32536	60.6002	3.35047e-10	9.67996e-08
RPS23	CD16+ Monocyte	-1.04235	11.1306	60.8442	3.60487e-10	9.91185e-08
RPS4X	CD16+ Monocyte	-1.18671	10.5417	60.3249	4.05879e-10	9.91185e-08
RPS7	CD16+ Monocyte	-1.03037	10.4179	60.2984	4.08347e-10	9.91185e-08
LINC02345	CD16+ Monocyte	-2.88777	3.74982	59.2416	4.14049e-10	9.91185e-08
RPS2	CD16+ Monocyte	-1.16179	11.4116	60.2	4.17655e-10	9.91185e-08
SMDT1	CD16+ Monocyte	-0.933065	7.05503	59.859	4.52022e-10	1.03575e-07
RPL9	CD16+ Monocyte	-1.10787	10.5724	59.1266	5.34808e-10	1.1846e-07
USP18	CD16+ Monocyte	4.20008	5.53874	58.6362	5.68477e-10	1.21856e-07
EIF3D	CD16+ Monocyte	-0.754095	7.12222	58.6288	6.00715e-10	1.24742e-07
IFI44L	CD16+ Monocyte	4.23922	8.46766	58.1256	6.77816e-10	1.34915e-07
OTOF	CD16+ Monocyte	7.93185	4.58907	56.1924	6.90312e-10	1.34915e-07
RPL15	CD16+ Monocyte	-1.00572	10.8044	57.8001	7.28476e-10	1.38306e-07
MRPS18C	CD16+ Monocyte	1.02202	6.84683	57.5979	7.65254e-10	1.41253e-07
TPT1	CD16+ Monocyte	-0.875801	11.8753	56.9961	8.80251e-10	1.58088e-07
TCN2	CD16+ Monocyte	2.67398	5.48339	56.5881	1.00039e-09	1.74936e-07
SLC25A5	CD16+ Monocyte	-1.07302	8.32629	56.2779	1.04382e-09	1.77851e-07
COMMD6	CD16+ Monocyte	-0.707406	8.19814	56.0895	1.09174e-09	1.81366e-07
BTF3	CD16+ Monocyte	-0.667134	9.00134	55.4713	1.26548e-09	1.99644e-07
RPL7A	CD16+ Monocyte	-1.15332	10.5314	55.4045	1.28587e-09	1.99644e-07
RPL22	CD16+ Monocyte	-1.07389	9.77081	55.292	1.32108e-09	1.99644e-07
RACK1	CD16+ Monocyte	-0.97782	10.0351	55.2764	1.32603e-09	1.99644e-07
SAMD9	CD16+ Monocyte	1.93772	7.93826	55.1967	1.35289e-09	1.99644e-07
PLSCR1	CD16+ Monocyte	2.23767	7.92317	55.108	1.38203e-09	1.99644e-07
MT-ATP6	CD16+ Monocyte	-1.31439	12.9716	54.8613	1.46539e-09	2.07181e-07
PGK1	CD16+ Monocyte	-0.558349	8.79346	54.7397	1.50919e-09	2.08268e-07
MS4A4A	CD16+ Monocyte	2.01812	7.35146	54.5919	1.5662e-09	2.08268e-07
ZBP1	CD16+ Monocyte	3.55092	5.30068	54.6427	1.57735e-09	2.08268e-07
MSN	CD16+ Monocyte	-0.556261	9.2174	54.502	1.59845e-09	2.08268e-07
RPL27	CD16+ Monocyte	-0.999234	9.82718	54.145	1.7429e-09	2.22722e-07
MNDA	CD16+ Monocyte	1.29586	10.0388	53.7881	1.90117e-09	2.38363e-07
RPL10A	CD16+ Monocyte	-1.51552	9.97106	53.5458	2.01694e-09	2.48196e-07
RPL10	CD16+ Monocyte	-1.07894	11.9372	53.2918	2.14629e-09	2.59311e-07
RPS6	CD16+ Monocyte	-1.2196	10.5918	52.8111	2.41532e-09	2.81348e-07
RPL18	CD16+ Monocyte	-0.869933	10.5377	52.6805	2.49434e-09	2.81348e-07
SELL	CD16+ Monocyte	2.26421	7.17966	52.6564	2.51482e-09	2.81348e-07
NOP53	CD16+ Monocyte	-0.877816	7.91463	52.6268	2.5282e-09	2.81348e-07
MT-CO2	CD16+ Monocyte	-1.09809	13.1757	52.5826	2.55527e-09	2.81348e-07
GPR18	CD16+ Monocyte	2.64747	3.63514	50.9207	2.58273e-09	2.81348e-07
IFI6	CD16+ Monocyte	3.2423	8.96152	51.795	3.10709e-09	3.3301e-07
RPL7	CD16+ Monocyte	-1.20484	9.83924	51.5061	3.33783e-09	3.52061e-07
MT-ND5	CD16+ Monocyte	-1.28584	10.586	51.4361	3.39668e-09	3.52671e-07
C4orf33	CD16+ Monocyte	0.935828	5.25682	51.1973	3.64326e-09	3.72454e-07
PRPF8	CD16+ Monocyte	-0.870834	5.82414	50.8517	3.94412e-09	3.88378e-07
RPL6	CD16+ Monocyte	-1.1999	10.4991	50.8109	3.97255e-09	3.88378e-07
CMPK2	CD16+ Monocyte	2.68233	6.26564	50.869	3.97437e-09	3.88378e-07
RPS8	CD16+ Monocyte	-1.06933	10.916	50.4496	4.35087e-09	4.19008e-07
IFIT1	CD16+ Monocyte	4.70878	8.19265	50.339	4.51304e-09	4.28417e-07
RPS15A	CD16+ Monocyte	-0.830436	10.9203	49.9933	4.883e-09	4.45943e-07
PEBP1	CD16+ Monocyte	-1.4615	5.08592	49.9967	4.92177e-09	4.45943e-07
RPS18	CD16+ Monocyte	-1.04374	11.2547	49.9476	4.93995e-09	4.45943e-07
RPS13	CD16+ Monocyte	-0.986483	10.7456	49.8964	5.00451e-09	4.45943e-07
HIST2H2BE	CD16+ Monocyte	2.04146	3.93595	49.6143	5.03322e-09	4.45943e-07
IFIT5	CD16+ Monocyte	1.86732	5.21567	49.7584	5.17635e-09	4.5259e-07
MT-ND4	CD16+ Monocyte	-1.29045	12.1418	49.4104	5.66301e-09	4.8871e-07
KIAA1958	CD16+ Monocyte	2.53976	3.73762	47.4351	6.02937e-09	5.13656e-07
MX1	CD16+ Monocyte	3.00973	8.43546	49.0588	6.20114e-09	5.21602e-07
KRT10	CD16+ Monocyte	-1.42849	5.976	48.9096	6.45401e-09	5.36086e-07
PRKDC	CD16+ Monocyte	-1.15679	6.07368	48.8455	6.55817e-09	5.38013e-07
NEXN	CD16+ Monocyte	3.10386	5.18506	48.6487	6.72789e-09	5.45206e-07
RPL18A	CD16+ Monocyte	-0.914663	11.076	48.3985	7.34029e-09	5.78782e-07
HSH2D	CD16+ Monocyte	1.19758	6.3482	48.3966	7.36043e-09	5.78782e-07
RPL13	CD16+ Monocyte	-1.05226	11.5411	48.3074	7.51477e-09	5.78782e-07
RPS14	CD16+ Monocyte	-0.921795	11.2529	48.2919	7.54483e-09	5.78782e-07
MDM2	CD16+ Monocyte	1.33541	6.71123	48.2818	7.57773e-09	5.78782e-07
EIF1	CD16+ Monocyte	-0.662377	11.2855	48.2157	7.69472e-09	5.78956e-07
IFITM1	CD16+ Monocyte	3.71186	8.77289	48.2449	7.75427e-09	5.78956e-07
RPL21	CD16+ Monocyte	-1.10575	11.0039	48.0547	8.02167e-09	5.92267e-07
SFT2D2	CD16+ Monocyte	-0.64282	6.8625	47.9175	8.3193e-09	6.07491e-07
LY96	CD16+ Monocyte	0.981489	7.24952	47.7852	8.60659e-09	6.16115e-07
SLC25A6	CD16+ Monocyte	-1.25709	9.31515	47.7758	8.62282e-09	6.16115e-07
EIF2AK2	CD16+ Monocyte	1.81807	7.35183	47.6807	8.8479e-09	6.21555e-07
MT-CO1	CD16+ Monocyte	-1.00315	13.5254	47.6599	8.88604e-09	6.21555e-07
AQP9	CD16+ Monocyte	2.7396	5.93948	47.5355	9.25286e-09	6.40471e-07
NAP1L1	CD16+ Monocyte	-1.14194	9.87614	47.3808	9.55517e-09	6.54579e-07
MT-CO3	CD16+ Monocyte	-1.3184	12.8694	46.9818	1.06045e-08	7.08084e-07
NCOA7	CD16+ Monocyte	1.62777	5.31823	46.9869	1.07878e-08	7.08084e-07
SPATS2L	CD16+ Monocyte	2.98076	5.35481	47.0175	1.07893e-08	7.08084e-07
CCNI	CD16+ Monocyte	-0.61111	8.83874	46.9068	1.08154e-08	7.08084e-07
AZI2	CD16+ Monocyte	0.810143	5.99722	46.8988	1.0869e-08	7.08084e-07
RPL23A	CD16+ Monocyte	-0.853148	10.5423	46.7126	1.13794e-08	7.3414e-07
EIF3E	CD16+ Monocyte	-0.978924	8.09559	46.618	1.16677e-08	7.45498e-07
RSAD2	CD16+ Monocyte	4.6926	7.41942	46.4014	1.25457e-08	7.93962e-07
RPSA	CD16+ Monocyte	-0.931756	9.49436	46.2277	1.29282e-08	8.10449e-07
IRF7	CD16+ Monocyte	2.1829	7.83405	45.9389	1.39612e-08	8.65863e-07
QARS	CD16+ Monocyte	-1.07481	5.45343	45.923	1.40727e-08	8.65863e-07
RPL17	CD16+ Monocyte	-1.00259	10.7286	45.6859	1.49206e-08	9.09609e-07
DYNC1H1	CD16+ Monocyte	-0.609222	6.94376	45.4044	1.60909e-08	9.72034e-07
IFIH1	CD16+ Monocyte	2.13735	6.81093	45.2999	1.66089e-08	9.87979e-07
RPS3	CD16+ Monocyte	-0.848158	10.5164	45.2731	1.66522e-08	9.87979e-07
SF1	CD16+ Monocyte	-0.566854	7.70203	45.2171	1.69074e-08	9.9246e-07
MCRIP2	CD16+ Monocyte	-1.00072	5.45028	45.2044	1.70264e-08	9.9246e-07
RBX1	CD16+ Monocyte	0.655527	8.49861	45.057	1.76428e-08	1.01511e-06
CHMP5	CD16+ Monocyte	1.19946	7.20795	45.0427	1.77206e-08	1.01511e-06
E2F2	CD16+ Monocyte	1.83404	4.29505	44.8576	1.81869e-08	1.03292e-06
FBL	CD16+ Monocyte	-1.0212	5.55253	44.9209	1.83559e-08	1.03369e-06
RPS11	CD16+ Monocyte	-0.807878	10.4725	44.7556	1.91228e-08	1.06628e-06
HERC5	CD16+ Monocyte	3.0369	6.77863	44.7559	1.92557e-08	1.06628e-06
MLEC	CD16+ Monocyte	-0.891786	5.51259	44.5407	2.03342e-08	1.10798e-06
RPL34	CD16+ Monocyte	-0.782209	11.1904	44.4955	2.05058e-08	1.10798e-06
OIP5-AS1	CD16+ Monocyte	-0.91375	6.02274	44.5022	2.0509e-08	1.10798e-06
EIF3H	CD16+ Monocyte	-0.597806	7.8335	44.4288	2.08814e-08	1.11901e-06
LY6E	CD16+ Monocyte	1.85053	9.89688	44.3612	2.12608e-08	1.12501e-06
SEC11A	CD16+ Monocyte	-0.67087	8.22058	44.3492	2.1332e-08	1.12501e-06
GTPBP2	CD16+ Monocyte	1.06142	4.26306	44.2624	2.25123e-08	1.17791e-06
TOR1B	CD16+ Monocyte	1.73682	4.9767	44.1486	2.30004e-08	1.188e-06
CCT6A	CD16+ Monocyte	-0.68307	6.76013	44.0621	2.30627e-08	1.188e-06
SNHG29	CD16+ Monocyte	-1.12951	7.54821	43.6717	2.5624e-08	1.30335e-06
RPL12	CD16+ Monocyte	-0.820002	10.7825	43.6604	2.56943e-08	1.30335e-06
RPL19	CD16+ Monocyte	-0.748577	11.0325	43.4555	2.71654e-08	1.36753e-06
SMIM30	CD16+ Monocyte	1.01723	5.34482	43.408	2.78054e-08	1.38922e-06
CD300E	CD16+ Monocyte	1.22683	8.40413	43.3275	2.81337e-08	1.39514e-06
SERPING1	CD16+ Monocyte	4.25231	5.87505	43.2481	2.89792e-08	1.42642e-06
EPSTI1	CD16+ Monocyte	2.11735	8.14558	43.0613	3.02601e-08	1.47852e-06
ARL6IP4	CD16+ Monocyte	-0.547	8.07644	42.8263	3.22605e-08	1.56475e-06
RPL24	CD16+ Monocyte	-0.643085	10.0764	42.619	3.41421e-08	1.64402e-06
RPL26	CD16+ Monocyte	-0.791536	11.4907	42.439	3.58736e-08	1.70829e-06
ADM	CD16+ Monocyte	2.73021	5.56359	42.4791	3.59911e-08	1.70829e-06
RPS24	CD16+ Monocyte	-0.75556	11.4324	42.399	3.62713e-08	1.70938e-06
RPS17	CD16+ Monocyte	-0.950003	9.00432	42.1546	3.88008e-08	1.79819e-06
RPLP0	CD16+ Monocyte	-1.27166	9.02373	42.1431	3.89237e-08	1.79819e-06
NME2	CD16+ Monocyte	-0.863123	8.65114	42.1391	3.89676e-08	1.79819e-06
HIST1H2AC	CD16+ Monocyte	2.04895	5.41461	42.1181	3.98539e-08	1.82641e-06
MAP3K7CL	CD16+ Monocyte	3.08181	4.9398	42.0002	4.1448e-08	1.88645e-06
RPL27A	CD16+ Monocyte	-0.88597	10.6187	41.8101	4.2677e-08	1.92918e-06
LAMP2	CD16+ Monocyte	0.67828	7.27397	41.721	4.37686e-08	1.96515e-06
RPL14	CD16+ Monocyte	-0.655003	10.4248	41.6665	4.44107e-08	1.9806e-06
BRI3BP	CD16+ Monocyte	-0.847535	4.88377	41.6744	4.47568e-08	1.98273e-06
PFKL	CD16+ Monocyte	-0.780561	6.35366	41.5684	4.56894e-08	2.01064e-06
PABPC1	CD16+ Monocyte	-1.04689	9.73227	41.5181	4.62812e-08	2.02328e-06
SNRNP200	CD16+ Monocyte	-0.71308	5.62563	41.1903	5.08897e-08	2.21021e-06
SLC25A3	CD16+ Monocyte	-0.572367	8.52102	41.0272	5.30733e-08	2.29008e-06
TRIM22	CD16+ Monocyte	1.50981	7.86097	40.8714	5.5464e-08	2.3778e-06
RPLP2	CD16+ Monocyte	-0.816899	10.5837	40.5543	6.05938e-08	2.58106e-06
KLHDC7B	CD16+ Monocyte	2.21691	5.03989	40.4055	6.45228e-08	2.73092e-06
RPL13A	CD16+ Monocyte	-0.952452	10.8285	40.0885	6.90962e-08	2.90598e-06
SP140	CD16+ Monocyte	1.63181	5.13913	40.0792	7.0329e-08	2.92924e-06
LILRB4	CD16+ Monocyte	1.10177	6.61852	39.9927	7.10835e-08	2.92924e-06
GMPR	CD16+ Monocyte	2.9894	4.51992	39.7566	7.13207e-08	2.92924e-06
PRKX	CD16+ Monocyte	-0.693063	5.70259	39.9814	7.14125e-08	2.92924e-06
IFIT3	CD16+ Monocyte	3.17781	8.4501	39.8881	7.31937e-08	2.98388e-06
MRPL42	CD16+ Monocyte	0.771132	5.71829	39.7828	7.56369e-08	3.05075e-06
OAS3	CD16+ Monocyte	2.13275	6.97954	39.7692	7.57522e-08	3.05075e-06
VPS51	CD16+ Monocyte	-0.795859	5.15427	39.6555	7.86182e-08	3.1471e-06
SP110	CD16+ Monocyte	0.882413	8.23487	39.5994	7.93869e-08	3.15884e-06
DHX58	CD16+ Monocyte	1.96023	4.81725	39.5844	8.17627e-08	3.23401e-06
HESX1	CD16+ Monocyte	5.78378	3.0733	37.5142	9.00538e-08	3.52004e-06
RPL11	CD16+ Monocyte	-0.688597	11.3248	39.0819	9.19976e-08	3.57234e-06
ATP5F1A	CD16+ Monocyte	-0.681604	7.40222	39.0652	9.2467e-08	3.57234e-06
RPS5	CD16+ Monocyte	-0.934255	9.49933	38.8901	9.71936e-08	3.73325e-06
MICOS10	CD16+ Monocyte	-0.515553	7.86822	38.7165	1.02173e-07	3.90196e-06
ATP10A	CD16+ Monocyte	1.72996	3.80202	37.7054	1.03518e-07	3.92366e-06
TMEM63A	CD16+ Monocyte	1.04785	4.00918	38.7313	1.03922e-07	3.92366e-06
ISG20	CD16+ Monocyte	3.11185	7.18915	38.5962	1.06e-07	3.97948e-06
TMA7	CD16+ Monocyte	-0.604906	8.5801	38.258	1.16592e-07	4.30466e-06
ISG15	CD16+ Monocyte	3.33365	10.1671	38.2495	1.1688e-07	4.30466e-06
PIM3	CD16+ Monocyte	1.0326	6.81733	38.2444	1.17141e-07	4.30466e-06
MRPS18A	CD16+ Monocyte	0.99067	4.50476	38.3178	1.17253e-07	4.30466e-06
PDLIM7	CD16+ Monocyte	1.24835	4.55005	38.1458	1.22784e-07	4.48298e-06
PLP2	CD16+ Monocyte	0.934653	6.90071	38.0609	1.23503e-07	4.48458e-06
HADHA	CD16+ Monocyte	-0.595381	7.28112	38.0264	1.24703e-07	4.50353e-06
NT5C3A	CD16+ Monocyte	2.37252	7.10632	37.9826	1.26482e-07	4.54311e-06
OAS2	CD16+ Monocyte	1.95578	7.26095	37.9604	1.27241e-07	4.5458e-06
RPL32	CD16+ Monocyte	-0.649456	11.2085	37.8786	1.3012e-07	4.61065e-06
RPL37A	CD16+ Monocyte	-0.752113	10.6228	37.87	1.30444e-07	4.61065e-06
ENG	CD16+ Monocyte	-1.53016	4.45947	37.7787	1.3594e-07	4.77947e-06
PARP10	CD16+ Monocyte	1.14039	4.66293	37.5025	1.47638e-07	5.1605e-06
DDX58	CD16+ Monocyte	1.92415	6.62645	37.4259	1.48988e-07	5.1605e-06
RBM3	CD16+ Monocyte	-0.901015	8.12934	37.411	1.49107e-07	5.1605e-06
DDX60	CD16+ Monocyte	1.53618	6.08461	37.3987	1.50412e-07	5.16467e-06
RPL29	CD16+ Monocyte	-0.702462	10.6123	37.3723	1.50782e-07	5.16467e-06
PLEK	CD16+ Monocyte	0.726495	8.94575	37.2905	1.54434e-07	5.24985e-06
IFIT2	CD16+ Monocyte	2.9515	8.13804	37.284	1.54849e-07	5.24985e-06
HERC6	CD16+ Monocyte	2.30282	4.75919	37.136	1.59858e-07	5.38001e-06
CCR1	CD16+ Monocyte	1.76833	7.01832	37.1623	1.60667e-07	5.38001e-06
YBX1	CD16+ Monocyte	-0.653877	10.2208	37.1455	1.61117e-07	5.38001e-06
IFITM3	CD16+ Monocyte	1.96589	11.0942	36.976	1.69324e-07	5.62578e-06
TNFSF13B	CD16+ Monocyte	1.15292	8.51696	36.9388	1.71205e-07	5.64082e-06
PAPSS2	CD16+ Monocyte	-1.70936	4.1424	37.021	1.71474e-07	5.64082e-06
CNP	CD16+ Monocyte	1.08801	5.12494	36.7977	1.80086e-07	5.89494e-06
SP100	CD16+ Monocyte	0.783988	7.84003	36.6783	1.84857e-07	6.02146e-06
IFI16	CD16+ Monocyte	1.16531	8.49503	36.6311	1.87425e-07	6.0753e-06
XRCC5	CD16+ Monocyte	-0.515311	7.71615	36.5277	1.93239e-07	6.22925e-06
CRTAM	CD16+ Monocyte	1.65675	4.07065	36.5805	1.94049e-07	6.22925e-06
MT-ND3	CD16+ Monocyte	-1.14574	12.4603	36.0929	2.19709e-07	7.01906e-06
CDKN1A	CD16+ Monocyte	1.28486	7.5431	36.0121	2.25121e-07	7.15756e-06
MX2	CD16+ Monocyte	1.95401	8.0379	35.9689	2.28021e-07	7.20028e-06
ST13	CD16+ Monocyte	-0.603556	6.91651	35.9604	2.28632e-07	7.20028e-06
RPS21	CD16+ Monocyte	-0.672012	10.1379	35.8582	2.35574e-07	7.38392e-06
RPL30	CD16+ Monocyte	-0.588448	11.3315	35.8331	2.37338e-07	7.40428e-06
LYRM4	CD16+ Monocyte	-1.18465	4.17412	35.6209	2.58508e-07	8.02704e-06
ZNFX1	CD16+ Monocyte	0.897784	5.95964	35.3968	2.71026e-07	8.3766e-06
AC104809.2	CD16+ Monocyte	-1.96363	4.47075	35.3094	2.79322e-07	8.59302e-06
PGLS	CD16+ Monocyte	-0.524348	8.01119	35.0439	3.00547e-07	9.20339e-06
LKAAEAR1	CD16+ Monocyte	-1.71109	3.60988	34.7599	3.25293e-07	9.91547e-06
S100A8	CD16+ Monocyte	1.70098	9.96344	34.7496	3.28347e-07	9.96286e-06
NOSIP	CD16+ Monocyte	0.721273	5.91665	34.5427	3.50345e-07	1.0582e-05
RPS16	CD16+ Monocyte	-0.956832	10.608	34.4515	3.59287e-07	1.0803e-05
RPS12	CD16+ Monocyte	-0.63978	11.5792	34.3446	3.71118e-07	1.11085e-05
WDFY4	CD16+ Monocyte	-1.08111	3.91509	34.2955	3.88819e-07	1.15344e-05
APOBEC3A	CD16+ Monocyte	2.21138	9.67659	34.1647	3.91961e-07	1.15759e-05
COPS9	CD16+ Monocyte	-0.653919	6.88228	34.1363	3.95507e-07	1.16289e-05
DTX3L	CD16+ Monocyte	1.17128	6.52243	34.0963	4.00976e-07	1.17378e-05
ACTG1	CD16+ Monocyte	-0.68477	10.3745	34.0035	4.11632e-07	1.19969e-05
DDX60L	CD16+ Monocyte	1.27204	6.96627	33.9905	4.13618e-07	1.20022e-05
ATOX1	CD16+ Monocyte	0.877976	7.36991	33.974	4.15486e-07	1.20039e-05
TMEM123	CD16+ Monocyte	1.11165	8.20089	33.8945	4.25619e-07	1.22435e-05
APEX1	CD16+ Monocyte	-1.00783	5.47524	33.878	4.28751e-07	1.22804e-05
PPM1K	CD16+ Monocyte	1.5379	4.80308	33.9064	4.31706e-07	1.2312e-05
EIF3K	CD16+ Monocyte	-0.564007	8.82692	33.7541	4.44182e-07	1.26136e-05
PPP1R14B	CD16+ Monocyte	-0.797197	6.26437	33.62	4.63154e-07	1.30793e-05
LGALS3BP	CD16+ Monocyte	2.95714	5.5553	33.6623	4.64517e-07	1.30793e-05
PARP12	CD16+ Monocyte	1.10368	6.05933	33.3146	5.09931e-07	1.42974e-05
PARP9	CD16+ Monocyte	1.59834	7.30691	33.2488	5.18879e-07	1.44872e-05
CD300LB	CD16+ Monocyte	1.68833	4.27586	33.1942	5.215e-07	1.44995e-05
IPO5	CD16+ Monocyte	-0.891835	4.79658	33.2399	5.25957e-07	1.45624e-05
LPP	CD16+ Monocyte	-0.71561	6.6476	33.134	5.37552e-07	1.48116e-05
HELZ2	CD16+ Monocyte	1.41492	5.76225	33.1334	5.39414e-07	1.48116e-05
MAZ	CD16+ Monocyte	-0.62577	5.88042	32.9901	5.62329e-07	1.53415e-05
C1QBP	CD16+ Monocyte	-0.756632	6.23185	32.9826	5.6333e-07	1.53415e-05
MAIP1	CD16+ Monocyte	0.995488	4.23966	33.011	5.70583e-07	1.54637e-05
IFITM2	CD16+ Monocyte	1.10927	10.7966	32.9239	5.73128e-07	1.54637e-05
RPL36A	CD16+ Monocyte	-0.741151	10.2653	32.9144	5.74799e-07	1.54637e-05
SLU7	CD16+ Monocyte	0.560971	6.59724	32.8841	5.80609e-07	1.5557e-05
PML	CD16+ Monocyte	1.3095	5.7003	32.8571	5.8713e-07	1.56686e-05
H2AFJ	CD16+ Monocyte	0.935168	6.62484	32.8261	5.91196e-07	1.5714e-05
CYSLTR1	CD16+ Monocyte	0.568706	6.43733	32.7148	6.12009e-07	1.61381e-05
EVI2A	CD16+ Monocyte	0.931942	7.17146	32.6709	6.20151e-07	1.62882e-05
ORMDL2	CD16+ Monocyte	0.648955	5.74284	32.6116	6.32529e-07	1.65478e-05
CAPG	CD16+ Monocyte	1.37671	6.81518	32.4437	6.65663e-07	1.73464e-05
ULK1	CD16+ Monocyte	0.869197	5.01587	32.4281	6.74347e-07	1.7504e-05
RPLP1	CD16+ Monocyte	-0.575842	11.7689	32.3042	6.94479e-07	1.79565e-05
ATP6AP2	CD16+ Monocyte	-0.596414	7.48001	32.2853	6.98732e-07	1.79964e-05
RPL35A	CD16+ Monocyte	-0.645881	10.5112	32.2154	7.13947e-07	1.83173e-05
MXD1	CD16+ Monocyte	0.901895	7.26493	32.1726	7.23812e-07	1.8499e-05
GRN	CD16+ Monocyte	0.713943	8.72391	32.0733	7.46347e-07	1.90018e-05
HLA-B	CD16+ Monocyte	0.737855	11.8477	32.0303	7.56378e-07	1.91837e-05
RTP4	CD16+ Monocyte	1.68404	4.62857	32.0426	7.62564e-07	1.92671e-05
PHF23	CD16+ Monocyte	0.929525	4.41763	31.9417	7.88322e-07	1.98424e-05
PRADC1	CD16+ Monocyte	-0.917549	4.84441	31.905	7.91997e-07	1.98597e-05
CREB3	CD16+ Monocyte	0.821578	4.64093	31.6872	8.53415e-07	2.13064e-05
TRIM5	CD16+ Monocyte	1.22854	5.05829	31.6634	8.5931e-07	2.13064e-05
IFI30	CD16+ Monocyte	0.787836	11.3483	31.5488	8.79528e-07	2.17266e-05
TOMM6	CD16+ Monocyte	-0.665592	7.91207	31.4659	9.02878e-07	2.22208e-05
TRAPPC6A	CD16+ Monocyte	-1.02245	4.92278	31.4453	9.1358e-07	2.24012e-05
IFI35	CD16+ Monocyte	1.61971	7.39122	31.4117	9.18713e-07	2.24443e-05
HMGN3	CD16+ Monocyte	-0.663138	6.62592	31.2766	9.58767e-07	2.3337e-05
RPS27	CD16+ Monocyte	-0.607387	11.7701	31.0943	1.01502e-06	2.46161e-05
LMNB1	CD16+ Monocyte	1.92308	4.7567	31.0803	1.03598e-06	2.49422e-05
GNAS	CD16+ Monocyte	-0.535929	8.96156	31.0173	1.04005e-06	2.495e-05
RPS25	CD16+ Monocyte	-0.566206	10.3317	30.9336	1.06796e-06	2.54367e-05
TOP2B	CD16+ Monocyte	-0.615817	6.17672	30.9371	1.068e-06	2.54367e-05
MT-ND2	CD16+ Monocyte	-0.782334	11.7373	30.8748	1.08805e-06	2.58217e-05
HOOK3	CD16+ Monocyte	-0.651403	6.63687	30.7157	1.14509e-06	2.70788e-05
CYSTM1	CD16+ Monocyte	1.0335	5.63523	30.6944	1.15772e-06	2.72804e-05
IL4I1	CD16+ Monocyte	2.97633	4.03418	30.1317	1.1691e-06	2.74063e-05
NMI	CD16+ Monocyte	1.02901	7.52482	30.6436	1.17131e-06	2.74063e-05
GIMAP4	CD16+ Monocyte	1.183	8.77987	30.561	1.20227e-06	2.80318e-05
VARS	CD16+ Monocyte	-0.988311	4.06628	30.5626	1.22629e-06	2.84918e-05
AL132709.8	CD16+ Monocyte	-0.926273	4.04632	30.4983	1.24807e-06	2.88528e-05
AIM2	CD16+ Monocyte	2.59511	5.4715	30.4799	1.2505e-06	2.88528e-05
FPR2	CD16+ Monocyte	1.80547	5.63947	30.4347	1.26075e-06	2.89886e-05
MGME1	CD16+ Monocyte	0.966661	4.93741	30.3992	1.28109e-06	2.93547e-05
GPANK1	CD16+ Monocyte	0.801255	4.88273	30.3691	1.2895e-06	2.94458e-05
PABPC4	CD16+ Monocyte	-0.818901	6.80798	30.3146	1.30104e-06	2.96076e-05
ATL3	CD16+ Monocyte	-0.663438	5.31837	30.1917	1.35744e-06	3.07856e-05
RSL24D1	CD16+ Monocyte	-0.524753	7.26312	30.0757	1.40411e-06	3.17357e-05
IL6ST	CD16+ Monocyte	0.991715	5.67471	29.8669	1.50964e-06	3.38905e-05
RPL35	CD16+ Monocyte	-0.573037	10.1509	29.785	1.5411e-06	3.4374e-05
EIF2S3	CD16+ Monocyte	-0.573807	7.3909	29.7676	1.5501e-06	3.4374e-05
SLC15A4	CD16+ Monocyte	0.697461	5.48429	29.779	1.5513e-06	3.4374e-05
RPL37	CD16+ Monocyte	-0.614127	11.0604	29.7634	1.55187e-06	3.4374e-05
TOMM22	CD16+ Monocyte	-0.565131	6.2366	29.6756	1.59764e-06	3.52701e-05
SAMD9L	CD16+ Monocyte	1.68751	7.83952	29.5893	1.64207e-06	3.60435e-05
MFNG	CD16+ Monocyte	-0.665744	5.7526	29.59	1.64352e-06	3.60435e-05
LARS	CD16+ Monocyte	-0.718592	5.83933	29.5384	1.67116e-06	3.6529e-05
MT2A	CD16+ Monocyte	2.19183	9.20846	29.452	1.71591e-06	3.73843e-05
NACA	CD16+ Monocyte	-0.530862	11.1728	29.4067	1.74114e-06	3.78101e-05
MED8	CD16+ Monocyte	0.69296	5.34367	29.4072	1.74708e-06	3.78155e-05
ALAS1	CD16+ Monocyte	0.927367	4.4181	29.3249	1.81589e-06	3.91772e-05
NUDT3	CD16+ Monocyte	-0.681165	6.27341	29.1402	1.89985e-06	4.0856e-05
AHNAK	CD16+ Monocyte	-0.956901	8.93768	29.0808	1.9352e-06	4.14819e-05
TUFM	CD16+ Monocyte	-0.724042	6.69878	28.9347	2.03018e-06	4.3239e-05
RPL23	CD16+ Monocyte	-0.951465	9.65447	28.8958	2.05518e-06	4.36316e-05
SMIM26	CD16+ Monocyte	0.666504	6.71997	28.8874	2.06186e-06	4.36339e-05
IGFBP7	CD16+ Monocyte	1.0863	5.10158	28.8144	2.12624e-06	4.48535e-05
TOMM20	CD16+ Monocyte	-0.624769	7.20901	28.7647	2.14544e-06	4.51152e-05
MT-ATP8	CD16+ Monocyte	-1.1949	6.88894	28.6711	2.2126e-06	4.61186e-05
UQCRB	CD16+ Monocyte	-0.500443	9.42264	28.6582	2.2208e-06	4.61186e-05
SMIM25	CD16+ Monocyte	-0.752421	8.78142	28.6582	2.22091e-06	4.61186e-05
PHB2	CD16+ Monocyte	-0.659021	6.58992	28.6189	2.25062e-06	4.659e-05
MAD2L1BP	CD16+ Monocyte	0.989101	3.90559	28.5463	2.34967e-06	4.83391e-05
TRIM38	CD16+ Monocyte	0.559144	7.86342	28.4203	2.40098e-06	4.92424e-05
ADAM8	CD16+ Monocyte	1.28453	4.93028	28.4318	2.41642e-06	4.94065e-05
SRM	CD16+ Monocyte	-0.829711	5.20536	28.264	2.5341e-06	5.16012e-05
FFAR2	CD16+ Monocyte	2.13781	6.43293	28.1536	2.62394e-06	5.31588e-05
ADAR	CD16+ Monocyte	0.750501	7.72442	28.1101	2.65882e-06	5.37016e-05
CCRL2	CD16+ Monocyte	1.32859	3.78858	28.0773	2.69236e-06	5.42143e-05
PLAC8	CD16+ Monocyte	1.57658	9.37587	28.0343	2.7256e-06	5.47178e-05
BACH1	CD16+ Monocyte	0.692766	7.90179	27.9288	2.82244e-06	5.63217e-05
RPS27L	CD16+ Monocyte	1.04396	8.31667	27.9188	2.83151e-06	5.63334e-05
N4BP1	CD16+ Monocyte	0.758137	6.25374	27.8894	2.86244e-06	5.67533e-05
CCT2	CD16+ Monocyte	-0.599985	5.79146	27.8819	2.86969e-06	5.67533e-05
TRIM34	CD16+ Monocyte	0.854558	4.8436	27.8796	2.89991e-06	5.71807e-05
NPM1	CD16+ Monocyte	-0.72461	7.91572	27.8189	2.92662e-06	5.75366e-05
TMEM140	CD16+ Monocyte	1.74872	4.30686	27.7641	2.94707e-06	5.76416e-05
ANAPC15	CD16+ Monocyte	-0.816282	5.0652	27.8055	2.94931e-06	5.76416e-05
FAS	CD16+ Monocyte	1.23033	5.05305	27.7095	3.05886e-06	5.96074e-05
GLUL	CD16+ Monocyte	0.869309	8.21053	27.672	3.07232e-06	5.96946e-05
ADAMTSL4	CD16+ Monocyte	0.730429	5.93591	27.6542	3.09573e-06	5.99742e-05
MRPS34	CD16+ Monocyte	-0.72598	5.99717	27.6145	3.13414e-06	6.05417e-05
HINT3	CD16+ Monocyte	0.737939	4.16543	27.5193	3.27402e-06	6.28782e-05
TOMM40	CD16+ Monocyte	-0.904881	4.68731	27.4678	3.30978e-06	6.33818e-05
TNFSF10	CD16+ Monocyte	1.84294	9.8986	27.4018	3.36042e-06	6.41667e-05
BIRC3	CD16+ Monocyte	0.815558	6.7192	27.3706	3.3969e-06	6.46774e-05
CIRBP	CD16+ Monocyte	-0.541651	7.99061	27.3048	3.47087e-06	6.58969e-05
STRAP	CD16+ Monocyte	-0.574485	5.98728	27.2464	3.54221e-06	6.70597e-05
NT5C	CD16+ Monocyte	-0.629415	5.7355	26.9559	3.90439e-06	7.34976e-05
MSRB1	CD16+ Monocyte	0.807816	6.42982	26.8974	3.97985e-06	7.47065e-05
DRAM1	CD16+ Monocyte	0.821838	5.10752	26.8776	4.02316e-06	7.53068e-05
SCRN1	CD16+ Monocyte	-0.791382	5.34309	26.7902	4.13417e-06	7.71673e-05
ACAP1	CD16+ Monocyte	1.3489	4.3388	26.8206	4.15574e-06	7.73526e-05
NDUFA10	CD16+ Monocyte	-0.519862	6.17535	26.6989	4.25329e-06	7.89472e-05
ABCE1	CD16+ Monocyte	-0.758806	5.19976	26.6847	4.28358e-06	7.9288e-05
CMIP	CD16+ Monocyte	0.503859	6.53388	26.6438	4.33273e-06	7.99749e-05
GNL3L	CD16+ Monocyte	-0.696593	5.58626	26.535	4.49927e-06	8.2819e-05
DNTTIP1	CD16+ Monocyte	0.775494	5.67993	26.4498	4.63148e-06	8.50171e-05
PTPRO	CD16+ Monocyte	0.959708	4.52314	26.426	4.66589e-06	8.54128e-05
RPL31	CD16+ Monocyte	-0.581978	8.90131	26.2312	4.9758e-06	9.03235e-05
BUD31	CD16+ Monocyte	0.570954	7.10592	26.2309	4.97783e-06	9.03235e-05
CLEC4A	CD16+ Monocyte	0.740137	6.46958	26.2309	4.97961e-06	9.03235e-05
IL2RG	CD16+ Monocyte	1.20816	6.50551	26.226	4.98852e-06	9.03235e-05
CTSL	CD16+ Monocyte	1.24941	7.7854	26.1973	5.03401e-06	9.08995e-05
BANF1	CD16+ Monocyte	-0.527312	6.88577	26.1734	5.07542e-06	9.13989e-05
IL1RN	CD16+ Monocyte	2.0454	5.05695	26.1008	5.21542e-06	9.36661e-05
GPD2	CD16+ Monocyte	1.50491	4.56874	26.0508	5.30409e-06	9.50019e-05
CTSD	CD16+ Monocyte	0.712038	8.28869	26.0271	5.33217e-06	9.52073e-05
PCBP2	CD16+ Monocyte	-0.514146	7.84381	26.0205	5.34422e-06	9.52073e-05
ADPRH	CD16+ Monocyte	1.03284	3.96251	26.0355	5.37569e-06	9.55119e-05
DDB2	CD16+ Monocyte	1.34059	5.46627	25.9705	5.4603e-06	9.64992e-05
CREG1	CD16+ Monocyte	0.780114	6.29289	25.8975	5.57764e-06	9.83115e-05
LILRB2	CD16+ Monocyte	0.705903	9.0514	25.8109	5.73825e-06	0.000100875
RELB	CD16+ Monocyte	0.777506	5.34718	25.8051	5.76632e-06	0.000101101
RHOC	CD16+ Monocyte	-0.786478	8.23234	25.7377	5.88323e-06	0.000102676
TESC	CD16+ Monocyte	-0.961468	6.881	25.7366	5.88706e-06	0.000102676
RPS19	CD16+ Monocyte	-0.543117	12.3936	25.716	5.92642e-06	0.000103092
MPC1	CD16+ Monocyte	-0.527617	6.6218	25.6989	5.96341e-06	0.000103464
PARP14	CD16+ Monocyte	1.47621	8.3226	25.6566	6.0485e-06	0.000104667
CX3CR1	CD16+ Monocyte	0.775629	8.61312	25.6399	6.0827e-06	0.000104986
ALKBH7	CD16+ Monocyte	-0.670104	6.33506	25.5445	6.2869e-06	0.000108229
SMAD3	CD16+ Monocyte	0.787696	5.04326	25.5191	6.37155e-06	0.000109403
ARID5B	CD16+ Monocyte	1.2763	4.93529	25.4867	6.45725e-06	0.000109976
NAPA	CD16+ Monocyte	0.866321	6.54282	25.4611	6.46916e-06	0.000109976
TIMP1	CD16+ Monocyte	0.982535	9.70992	25.4541	6.48077e-06	0.000109976
FAM168B	CD16+ Monocyte	-0.896979	4.26663	25.4875	6.48768e-06	0.000109976
AP5B1	CD16+ Monocyte	0.751548	5.97089	25.4034	6.60193e-06	0.000111628
SNX20	CD16+ Monocyte	0.629861	6.29037	25.2921	6.85535e-06	0.000115326
ESYT1	CD16+ Monocyte	-0.61324	5.266	25.2531	6.96044e-06	0.000116798
NFKB2	CD16+ Monocyte	0.615	6.2107	25.1399	7.22384e-06	0.000120913
BTN3A1	CD16+ Monocyte	0.953244	5.56167	25.1057	7.32913e-06	0.00012223
MT-ND4L	CD16+ Monocyte	-0.884975	8.48594	25.0914	7.33932e-06	0.00012223
TAF15	CD16+ Monocyte	-0.651224	6.20318	24.9933	7.59615e-06	0.000125988
RNF19B	CD16+ Monocyte	0.818884	5.49134	24.9964	7.60291e-06	0.000125988
PNN	CD16+ Monocyte	-0.571285	6.90538	24.9367	7.74249e-06	0.000127982
SAMD4A	CD16+ Monocyte	1.36862	5.99018	24.7784	8.1852e-06	0.00013463
METTL14	CD16+ Monocyte	0.700602	4.65493	24.7111	8.45418e-06	0.00013803
IARS2	CD16+ Monocyte	-0.575693	5.33252	24.618	8.66087e-06	0.000141058
SGMS1	CD16+ Monocyte	0.73903	4.52463	24.4909	9.12523e-06	0.000148257
HLA-A	CD16+ Monocyte	1.01337	11.2525	24.4436	9.17948e-06	0.000148775
TDRD7	CD16+ Monocyte	1.02363	4.69872	24.4403	9.26052e-06	0.000148998
INSIG1	CD16+ Monocyte	-0.77262	6.64993	24.3923	9.34778e-06	0.000150039
LDLR	CD16+ Monocyte	1.25882	5.01343	24.3836	9.45664e-06	0.00015142
UGGT1	CD16+ Monocyte	-0.72747	5.10113	24.339	9.55155e-06	0.000152323
HEXB	CD16+ Monocyte	0.706478	5.60745	24.3323	9.55887e-06	0.000152323
PLBD1	CD16+ Monocyte	1.09551	6.93307	24.2967	9.66442e-06	0.000153636
CD14	CD16+ Monocyte	1.34859	7.55503	24.2376	9.86365e-06	0.000156429
PATL1	CD16+ Monocyte	0.650859	5.38478	24.2115	9.98763e-06	0.000158019
C1GALT1	CD16+ Monocyte	0.619771	6.41997	24.1213	1.02754e-05	0.000161801
SRGN	CD16+ Monocyte	0.65914	10.8484	24.0417	1.05578e-05	0.000165855
IER5	CD16+ Monocyte	0.650308	8.67584	23.9411	1.09362e-05	0.000170991
UROS	CD16+ Monocyte	-0.849925	4.78074	23.9422	1.09867e-05	0.000171377
NFE2	CD16+ Monocyte	1.19478	5.01406	23.918	1.11202e-05	0.000173053
C15orf48	CD16+ Monocyte	2.86528	3.50176	23.2058	1.16169e-05	0.00017994
DNASE2	CD16+ Monocyte	0.871723	6.26757	23.7211	1.18212e-05	0.000182679
TMEM30A	CD16+ Monocyte	0.697365	6.64469	23.5685	1.24701e-05	0.000192259
HSP90AB1	CD16+ Monocyte	-0.852138	8.76322	23.5083	1.27294e-05	0.000195351
GABPB2	CD16+ Monocyte	-0.851421	4.57665	23.5006	1.28841e-05	0.000197269
PDGFC	CD16+ Monocyte	-1.56792	3.86618	23.4338	1.32489e-05	0.000201925
MT-ND1	CD16+ Monocyte	-0.666743	12.1304	23.3157	1.36236e-05	0.00020716
DTD1	CD16+ Monocyte	-0.737379	4.76399	23.2735	1.38899e-05	0.000210727
SLC16A7	CD16+ Monocyte	-1.11692	5.56199	23.0708	1.48812e-05	0.000223722
PRMT1	CD16+ Monocyte	-0.512574	5.34421	23.0436	1.50257e-05	0.000224878
DCAF15	CD16+ Monocyte	0.672375	4.91446	22.9259	1.57388e-05	0.000235022
TLR1	CD16+ Monocyte	0.610976	6.4434	22.804	1.63428e-05	0.000242948
RPS20	CD16+ Monocyte	-0.602003	9.77339	22.7867	1.64332e-05	0.000243746
RBM38	CD16+ Monocyte	-0.647796	5.23013	22.768	1.65818e-05	0.000245239
CLNS1A	CD16+ Monocyte	-0.509936	6.19006	22.6874	1.70343e-05	0.000249818
VRK2	CD16+ Monocyte	0.706259	5.37018	22.6825	1.71025e-05	0.000249818
NEAT1	CD16+ Monocyte	-0.531517	12.2242	22.6743	1.71045e-05	0.000249818
UBA3	CD16+ Monocyte	0.504473	6.0839	22.525	1.80597e-05	0.000262597
SHFL	CD16+ Monocyte	1.00072	5.71089	22.4988	1.82436e-05	0.000264692
CDC42EP2	CD16+ Monocyte	1.25999	5.08858	22.5036	1.82915e-05	0.000264808
MARCKS	CD16+ Monocyte	0.767072	9.87869	22.4725	1.83825e-05	0.000265357
RICTOR	CD16+ Monocyte	0.505061	6.45889	22.4699	1.84092e-05	0.000265357
GIMAP7	CD16+ Monocyte	1.16323	8.13279	22.4403	1.85988e-05	0.000267509
VPS25	CD16+ Monocyte	-0.676511	5.06323	22.4186	1.87854e-05	0.000269534
WDR46	CD16+ Monocyte	-0.619565	4.89131	22.4167	1.88208e-05	0.000269534
RFTN1	CD16+ Monocyte	-0.544347	5.46133	22.4016	1.88847e-05	0.000269869
TTC19	CD16+ Monocyte	-0.625244	5.22971	22.3744	1.9083e-05	0.000272117
PDK3	CD16+ Monocyte	-0.557261	4.97627	22.3597	1.92307e-05	0.000273636
PHF11	CD16+ Monocyte	0.708763	6.41263	22.3177	1.94437e-05	0.000275992
TRAPPC2L	CD16+ Monocyte	-0.576639	5.53984	22.3145	1.94794e-05	0.000275992
CAMK1D	CD16+ Monocyte	-0.743082	5.56207	22.306	1.95401e-05	0.000276263
U62317.4	CD16+ Monocyte	1.25741	4.26815	22.3267	1.96393e-05	0.000277077
OAS1	CD16+ Monocyte	1.11472	8.31322	22.2137	2.01706e-05	0.00028397
NHP2	CD16+ Monocyte	-0.596768	5.77769	22.2079	2.02287e-05	0.000284185
RAB11FIP4	CD16+ Monocyte	0.739742	5.2362	22.1939	2.03879e-05	0.000285818
FPR1	CD16+ Monocyte	1.18282	7.48367	22.1598	2.05692e-05	0.000287753
PNPT1	CD16+ Monocyte	1.25516	5.40538	21.9145	2.2576e-05	0.000313844
SRA1	CD16+ Monocyte	0.507417	6.35438	21.8891	2.26805e-05	0.000314639
PRR5L	CD16+ Monocyte	-0.992193	4.28482	21.8348	2.33576e-05	0.000322685
RIN2	CD16+ Monocyte	0.955294	5.50731	21.8089	2.34272e-05	0.000322975
GCA	CD16+ Monocyte	0.575232	7.27102	21.7755	2.36244e-05	0.000325019
AGO1	CD16+ Monocyte	-0.733611	5.51675	21.7475	2.39029e-05	0.000327963
BASP1	CD16+ Monocyte	1.18396	6.11514	21.7412	2.39371e-05	0.000327963
C1orf162	CD16+ Monocyte	0.504638	9.29013	21.7153	2.41393e-05	0.000330053
OSTC	CD16+ Monocyte	-0.503447	6.26237	21.6545	2.4688e-05	0.000335941
COA6	CD16+ Monocyte	0.646729	5.94448	21.5873	2.53113e-05	0.000343069
APRT	CD16+ Monocyte	-0.750575	7.45911	21.5806	2.53494e-05	0.000343069
C2	CD16+ Monocyte	1.69653	5.27437	21.517	2.61073e-05	0.000351893
CTSA	CD16+ Monocyte	0.728076	6.68439	21.4884	2.62183e-05	0.00035202
IGFLR1	CD16+ Monocyte	0.849458	6.31639	21.4878	2.6229e-05	0.00035202
MAP3K20	CD16+ Monocyte	-0.887456	5.07863	21.3768	2.73792e-05	0.000365836
TMA16	CD16+ Monocyte	-0.652325	4.92012	21.3741	2.74171e-05	0.000365836
HSDL2	CD16+ Monocyte	0.711467	4.80827	21.372	2.75331e-05	0.000366649
SLAMF7	CD16+ Monocyte	1.62731	6.30722	21.3262	2.7844e-05	0.000370046
ODF3B	CD16+ Monocyte	0.776037	6.19603	21.2955	2.81305e-05	0.000373108
PSMG3	CD16+ Monocyte	-0.655217	4.52204	21.2184	2.9106e-05	0.000383749
MRPL3	CD16+ Monocyte	-0.629259	5.25588	21.1976	2.91895e-05	0.000384087
HDHD5	CD16+ Monocyte	-0.870004	3.98293	21.1847	2.96196e-05	0.000388977
REEP4	CD16+ Monocyte	0.71184	4.74101	21.0545	3.09025e-05	0.000403413
SETD7	CD16+ Monocyte	-0.726307	4.56652	21.0345	3.11464e-05	0.000404234
MCTP1	CD16+ Monocyte	-0.6556	6.07262	20.9597	3.18035e-05	0.000411957
LARP7	CD16+ Monocyte	0.527134	7.07447	20.9356	3.20719e-05	0.000414627
MAVS	CD16+ Monocyte	-0.82615	4.46311	20.9535	3.21725e-05	0.000415119
SLC9A3R1	CD16+ Monocyte	-0.671818	6.10215	20.9071	3.24223e-05	0.000417531
ISOC2	CD16+ Monocyte	-0.72542	4.6656	20.8569	3.31454e-05	0.000424024
NINJ1	CD16+ Monocyte	0.645342	7.64967	20.8212	3.34415e-05	0.000426523
CMTM3	CD16+ Monocyte	-0.779104	5.37247	20.7638	3.4212e-05	0.000434682
MYOF	CD16+ Monocyte	-0.562285	6.81446	20.7528	3.42989e-05	0.000434954
CXCL10	CD16+ Monocyte	4.63683	7.09532	20.7066	3.50619e-05	0.000442099
CD2AP	CD16+ Monocyte	1.27511	5.3493	20.702	3.51299e-05	0.000442118
DDIT3	CD16+ Monocyte	0.954426	5.19044	20.4942	3.78439e-05	0.000474477
HIST1H1C	CD16+ Monocyte	1.26798	5.61212	20.4846	3.80509e-05	0.00047451
ING2	CD16+ Monocyte	-0.779991	5.13737	20.4768	3.80608e-05	0.00047451
SRSF6	CD16+ Monocyte	-0.58806	6.33106	20.4408	3.84826e-05	0.000477975
ATM	CD16+ Monocyte	-0.540915	7.10889	20.3988	3.90765e-05	0.000483544
NIBAN1	CD16+ Monocyte	0.897907	5.69268	20.3925	3.93401e-05	0.000485902
ACP2	CD16+ Monocyte	1.02492	5.41416	20.3094	4.04814e-05	0.000499071
YME1L1	CD16+ Monocyte	0.533244	7.25443	20.2061	4.19635e-05	0.000516385
CHP1	CD16+ Monocyte	-0.545544	6.15595	20.1355	4.30934e-05	0.000528444
UBE2Z	CD16+ Monocyte	0.64307	6.39826	20.0776	4.40247e-05	0.000537577
PTDSS1	CD16+ Monocyte	-0.630115	4.97798	20.0797	4.40902e-05	0.000537577
SPOP	CD16+ Monocyte	0.581047	6.08838	19.9793	4.56793e-05	0.000553904
SPRED1	CD16+ Monocyte	-1.11464	5.31538	19.9025	4.70487e-05	0.000569469
ATP2B1	CD16+ Monocyte	-0.578971	8.03196	19.8881	4.72231e-05	0.000570541
MS4A6A	CD16+ Monocyte	1.07335	7.84	19.8791	4.73864e-05	0.000571475
SHMT2	CD16+ Monocyte	-0.835612	4.25009	19.8953	4.74965e-05	0.000571765
ZNF350	CD16+ Monocyte	0.720667	4.62252	19.8733	4.78348e-05	0.000574796
SCGB3A1	CD16+ Monocyte	-1.35352	4.4763	19.8246	4.86763e-05	0.000583852
TBC1D9	CD16+ Monocyte	-1.09866	5.10843	19.809	4.87978e-05	0.000584255
ZNF766	CD16+ Monocyte	0.763537	4.49455	19.8018	4.91689e-05	0.000586115
CPSF6	CD16+ Monocyte	-0.579189	5.12151	19.749	4.98427e-05	0.000592495
CCL3	CD16+ Monocyte	2.22886	7.21623	19.7241	5.02693e-05	0.000596499
DDB1	CD16+ Monocyte	-0.535498	5.13868	19.6711	5.13356e-05	0.00060723
PRKCE	CD16+ Monocyte	0.790849	4.04842	19.6965	5.13564e-05	0.00060723
GLRX	CD16+ Monocyte	0.558073	8.29727	19.6503	5.16082e-05	0.000608761
LGALS9	CD16+ Monocyte	0.577039	7.9365	19.6425	5.17607e-05	0.000608761
ST8SIA4	CD16+ Monocyte	0.525231	6.77411	19.4691	5.5248e-05	0.000644076
MRPS6	CD16+ Monocyte	-0.657224	5.58654	19.4592	5.54875e-05	0.000645735
DSTN	CD16+ Monocyte	-0.50044	6.65024	19.4505	5.56328e-05	0.000646294
PAXX	CD16+ Monocyte	-0.512695	5.79972	19.3909	5.6919e-05	0.000660082
ECHS1	CD16+ Monocyte	-0.614827	5.96291	19.3834	5.70715e-05	0.000660697
SCO2	CD16+ Monocyte	0.879436	7.59113	19.3225	5.83648e-05	0.000674494
IMPDH2	CD16+ Monocyte	-0.805037	4.72804	19.284	5.94218e-05	0.000683943
MDFIC	CD16+ Monocyte	-0.727414	5.05311	19.2676	5.97395e-05	0.000685611
CEP85L	CD16+ Monocyte	-0.8932	5.54037	19.1759	6.17461e-05	0.000706201
HERC1	CD16+ Monocyte	-0.561937	6.0805	19.1452	6.24281e-05	0.000712774
YIPF5	CD16+ Monocyte	0.565435	5.18816	19.1023	6.35556e-05	0.000723146
GAS5	CD16+ Monocyte	-0.738128	6.8297	19.0922	6.3663e-05	0.000723146
NEU1	CD16+ Monocyte	1.00811	6.75049	19.0837	6.38764e-05	0.000723827
TRAFD1	CD16+ Monocyte	0.747948	5.39424	19.0886	6.39408e-05	0.000723827
LRPPRC	CD16+ Monocyte	-0.652882	5.4325	19.0278	6.53122e-05	0.000735592
GM2A	CD16+ Monocyte	1.47103	4.52602	19.0016	6.61526e-05	0.000743797
RAB37	CD16+ Monocyte	-0.935069	4.76711	18.9749	6.68623e-05	0.000749241
RPS10	CD16+ Monocyte	-0.661825	8.74612	18.8739	6.91318e-05	0.000769093
GANAB	CD16+ Monocyte	-0.571034	5.11603	18.8773	6.92126e-05	0.000769093
RTCB	CD16+ Monocyte	0.825126	6.31945	18.8573	6.9609e-05	0.000771118
LSM4	CD16+ Monocyte	-0.507684	6.55044	18.8338	7.02076e-05	0.000774966
PMPCA	CD16+ Monocyte	-0.691362	4.28314	18.824	7.10508e-05	0.000782973
MAPKAPK5	CD16+ Monocyte	-0.636517	4.44232	18.7868	7.19587e-05	0.000790356
SETBP1	CD16+ Monocyte	-0.895197	5.08971	18.6391	7.57685e-05	0.000828095
NOD2	CD16+ Monocyte	0.714129	4.77516	18.6163	7.66255e-05	0.000834716
RFXANK	CD16+ Monocyte	0.511417	5.26024	18.6007	7.68299e-05	0.000835573
C21orf91	CD16+ Monocyte	0.883765	4.61056	18.5465	7.83183e-05	0.000849943
NDUFAF8	CD16+ Monocyte	-0.674243	5.29388	18.543	7.85025e-05	0.000849943
AC083862.3	CD16+ Monocyte	1.2463	3.91117	18.5453	7.89716e-05	0.000852687
RAPH1	CD16+ Monocyte	-1.36433	3.86453	18.5309	7.93028e-05	0.00085408
YJU2	CD16+ Monocyte	0.702211	4.54231	18.5223	7.94477e-05	0.000854256
TATDN3	CD16+ Monocyte	0.61115	5.56218	18.4591	8.1046e-05	0.000870034
DST	CD16+ Monocyte	-1.34145	4.45947	18.4453	8.21364e-05	0.000880317
HIGD2A	CD16+ Monocyte	-0.509688	8.22441	18.3882	8.31692e-05	0.000888933
BCL3	CD16+ Monocyte	0.806593	4.86665	18.3982	8.32078e-05	0.000888933
GPR65	CD16+ Monocyte	0.705428	7.13071	18.3701	8.37599e-05	0.000893394
CXorf21	CD16+ Monocyte	0.639733	5.49749	18.3531	8.43933e-05	0.000897269
C6orf120	CD16+ Monocyte	0.718119	4.35602	18.3648	8.4676e-05	0.000898837
ZNF330	CD16+ Monocyte	0.523592	5.28828	18.3321	8.5126e-05	0.000902173
STAC3	CD16+ Monocyte	0.78384	5.63226	18.2867	8.66087e-05	0.000914967
C1orf35	CD16+ Monocyte	0.510882	4.97252	18.2483	8.79744e-05	0.000926877
PCNT	CD16+ Monocyte	-0.728164	4.47782	18.2569	8.8015e-05	0.000926877
SMIM29	CD16+ Monocyte	0.622509	4.60247	18.2522	8.81753e-05	0.000927096
SND1	CD16+ Monocyte	-0.655011	5.40803	18.2294	8.84749e-05	0.000927312
C14orf119	CD16+ Monocyte	0.551718	5.07371	18.207	8.94102e-05	0.000935639
BX284668.5	CD16+ Monocyte	-1.09088	4.02628	18.1699	9.11752e-05	0.000952609
DDAH2	CD16+ Monocyte	0.691116	6.25048	18.1325	9.17725e-05	0.000957344
TFEC	CD16+ Monocyte	1.33581	5.45979	18.1199	9.25588e-05	0.000962709
IKBKE	CD16+ Monocyte	0.9156	4.02564	18.1378	9.25765e-05	0.000962709
TRIM21	CD16+ Monocyte	0.809183	5.11192	18.103	9.32331e-05	0.000968022
LENG1	CD16+ Monocyte	0.535399	5.24786	17.99	9.7101e-05	0.00100077
ETV7	CD16+ Monocyte	3.04671	4.0053	17.9019	9.71404e-05	0.00100077
NPL	CD16+ Monocyte	0.503533	6.07038	17.927	9.93153e-05	0.00102002
VCAN	CD16+ Monocyte	1.03464	7.89027	17.8759	0.000101264	0.00103842
CDK2AP1	CD16+ Monocyte	-0.633156	6.27126	17.8639	0.000101744	0.00104174
SLC16A6	CD16+ Monocyte	0.802865	4.84639	17.823	0.000103902	0.00106056
GATD3B	CD16+ Monocyte	-1.26068	3.87864	17.8246	0.000104137	0.00106134
HDAC1	CD16+ Monocyte	-0.579169	6.0032	17.7966	0.000104436	0.00106164
JAML	CD16+ Monocyte	0.62883	8.04971	17.7942	0.000104486	0.00106164
AHCY	CD16+ Monocyte	-0.835249	4.40366	17.7477	0.000106935	0.00108156
TOMM7	CD16+ Monocyte	-0.657277	8.61227	17.6828	0.000109078	0.00109847
TCTN3	CD16+ Monocyte	-0.775129	4.08152	17.7029	0.000109269	0.00109847
SPN	CD16+ Monocyte	-0.518151	8.16094	17.6528	0.000110354	0.00110771
FBXO6	CD16+ Monocyte	0.941323	5.45629	17.633	0.000111343	0.00111506
OXA1L	CD16+ Monocyte	-0.555845	6.13955	17.5964	0.000112831	0.00112746
SPTLC2	CD16+ Monocyte	0.701916	6.88568	17.5905	0.000113074	0.0011282
SMCHD1	CD16+ Monocyte	0.583035	8.30399	17.5587	0.000114449	0.0011395
ZG16B	CD16+ Monocyte	0.854837	4.53041	17.5651	0.000114848	0.0011395
ANKRD22	CD16+ Monocyte	3.64421	4.6411	17.353	0.000114894	0.0011395
ATP6V0A1	CD16+ Monocyte	0.566104	5.06938	17.4813	0.000118271	0.00116541
AEN	CD16+ Monocyte	1.40443	3.78447	17.4905	0.000118294	0.00116541
TRIM69	CD16+ Monocyte	0.956917	5.72459	17.4648	0.000118805	0.00116784
RAE1	CD16+ Monocyte	-0.73619	4.54333	17.3696	0.000123732	0.00120911
POLR2G	CD16+ Monocyte	-0.563858	6.00174	17.3131	0.000125956	0.00122904
CMTR1	CD16+ Monocyte	0.882585	4.42818	17.2889	0.000128086	0.00124616
DYNLT1	CD16+ Monocyte	0.809545	7.37003	17.2264	0.000130246	0.00126533
SQOR	CD16+ Monocyte	0.703729	6.56328	17.2151	0.000130842	0.00126794
SHISA5	CD16+ Monocyte	0.515464	6.6696	17.2117	0.000131012	0.00126794
SOD1	CD16+ Monocyte	-0.582772	7.53004	17.1472	0.000134327	0.0012955
NEPRO	CD16+ Monocyte	0.767672	4.03453	17.1555	0.00013519	0.00130194
ABCA1	CD16+ Monocyte	1.19787	4.98943	17.1349	0.000135686	0.00130482
HSPD1	CD16+ Monocyte	-0.656175	6.84242	17.0941	0.000137157	0.00131516
ING4	CD16+ Monocyte	0.53879	5.59995	17.0913	0.000137419	0.00131577
BTN3A3	CD16+ Monocyte	0.729687	5.09775	16.9961	0.000142919	0.0013645
SLC25A39	CD16+ Monocyte	-0.681746	4.61344	16.9325	0.000146613	0.00139777
NLRC4	CD16+ Monocyte	0.61577	5.33347	16.9171	0.000147307	0.00140001
NADK	CD16+ Monocyte	0.523417	6.89123	16.9088	0.00014748	0.00140001
FNDC3B	CD16+ Monocyte	0.670558	5.45412	16.8516	0.000151258	0.00143178
SIGLEC7	CD16+ Monocyte	0.856359	4.97949	16.8443	0.000151993	0.00143669
XAB2	CD16+ Monocyte	0.579794	4.56298	16.8285	0.00015296	0.00144173
CD63	CD16+ Monocyte	1.0683	8.57621	16.7907	0.000154449	0.00145165
TMEM60	CD16+ Monocyte	0.805246	5.02645	16.7646	0.00015677	0.00147138
STK32C	CD16+ Monocyte	-0.973185	4.78553	16.6964	0.000160778	0.00150052
C11orf68	CD16+ Monocyte	0.716208	4.14782	16.655	0.000164273	0.00152244
ERI3	CD16+ Monocyte	-0.575027	4.08196	16.6413	0.000165019	0.00152723
ADGRE3	CD16+ Monocyte	-1.24443	4.15556	16.6216	0.000166365	0.00153755
DELE1	CD16+ Monocyte	-0.507974	5.26059	16.5862	0.000167611	0.00154691
STIP1	CD16+ Monocyte	-0.61728	5.69371	16.5709	0.000168524	0.00155232
C1GALT1C1	CD16+ Monocyte	0.586023	4.71933	16.5754	0.000168863	0.00155232
RIPK3	CD16+ Monocyte	0.718544	4.27911	16.582	0.000168898	0.00155232
MASTL	CD16+ Monocyte	0.893307	3.97408	16.568	0.000170008	0.00155821
MRPS28	CD16+ Monocyte	-0.55015	5.06719	16.532	0.00017129	0.00156644
TNFAIP3	CD16+ Monocyte	1.12201	6.96493	16.5278	0.000171377	0.00156644
SH2B2	CD16+ Monocyte	0.646452	5.40507	16.4975	0.000173594	0.00158452
FAM8A1	CD16+ Monocyte	0.787327	4.36885	16.4843	0.00017545	0.00159927
NAT9	CD16+ Monocyte	-0.720279	4.63957	16.4729	0.000175766	0.00159995
GOLGA3	CD16+ Monocyte	-0.536182	4.79102	16.449	0.000177354	0.0016122
FRMD3	CD16+ Monocyte	1.59656	4.10403	16.414	0.000179278	0.0016247
PLD3	CD16+ Monocyte	0.664393	5.61041	16.4144	0.000179344	0.0016247
FZD1	CD16+ Monocyte	-1.48906	3.77464	16.4159	0.000179462	0.0016247
EPRS	CD16+ Monocyte	-0.534218	6.07927	16.3785	0.000181782	0.00164045
RPP30	CD16+ Monocyte	0.561617	5.00126	16.3421	0.000184787	0.00166383
CKS1B	CD16+ Monocyte	-0.583071	5.49899	16.3045	0.000187266	0.00167933
FAM126A	CD16+ Monocyte	-0.727407	5.70663	16.2957	0.000187912	0.00168285
TLR6	CD16+ Monocyte	0.750357	4.54318	16.2674	0.000188224	0.00168338
CHML	CD16+ Monocyte	-0.65078	5.0234	16.2729	0.000189876	0.00169586
GPR35	CD16+ Monocyte	1.00929	4.79877	16.2196	0.000194097	0.0017266
KDM1A	CD16+ Monocyte	-0.514378	4.5832	16.1622	0.000198883	0.00176595
SOCS3	CD16+ Monocyte	1.64882	6.34522	16.1471	0.000199317	0.00176595
ARID5A	CD16+ Monocyte	0.821172	5.00354	16.147	0.000199799	0.00176786
GYPC	CD16+ Monocyte	-0.802609	4.92996	16.0598	0.000206724	0.0018217
NUCB2	CD16+ Monocyte	0.909794	4.47947	16.0662	0.00020698	0.0018217
PRNP	CD16+ Monocyte	-0.61284	5.59719	16.02	0.000209656	0.00184281
RGL1	CD16+ Monocyte	1.59917	3.70741	15.823	0.000212344	0.00185906
DKC1	CD16+ Monocyte	-0.604324	4.73303	15.971	0.000214252	0.0018733
C3AR1	CD16+ Monocyte	0.830667	7.82084	15.9537	0.000215135	0.00187608
USP25	CD16+ Monocyte	0.586196	6.02851	15.9458	0.000215949	0.00188071
TGFBI	CD16+ Monocyte	-0.535426	6.8736	15.8866	0.000220991	0.00191848
TENT5A	CD16+ Monocyte	0.587683	6.95409	15.8848	0.000221152	0.00191848
S100P	CD16+ Monocyte	2.00807	4.16765	15.7763	0.000225639	0.00195407
MAPK3	CD16+ Monocyte	0.577109	4.79853	15.8364	0.00022624	0.00195407
BATF	CD16+ Monocyte	1.00607	3.47835	15.7099	0.000236871	0.0020363
MAT2A	CD16+ Monocyte	-0.552696	5.92052	15.7016	0.000238062	0.00204383
YPEL3	CD16+ Monocyte	0.517634	6.66025	15.6007	0.000247817	0.00211663
PTPA	CD16+ Monocyte	0.616394	4.61174	15.6061	0.000248317	0.00211818
DDRGK1	CD16+ Monocyte	0.514318	5.54078	15.5668	0.000251381	0.0021361
GOSR1	CD16+ Monocyte	0.563939	5.29761	15.5044	0.000257903	0.00218724
BSCL2	CD16+ Monocyte	0.791913	4.27686	15.5165	0.000258058	0.00218724
MILR1	CD16+ Monocyte	0.901726	4.31718	15.4815	0.00026162	0.00221178
ABHD2	CD16+ Monocyte	-0.518493	5.59348	15.4367	0.000264851	0.00223478
MAPK9	CD16+ Monocyte	-0.621176	4.39891	15.4461	0.000265012	0.00223478
S100A9	CD16+ Monocyte	0.836806	11.1367	15.4021	0.000268367	0.0022602
NFKBIA	CD16+ Monocyte	0.796077	9.82955	15.3767	0.000271122	0.00228052
PTRHD1	CD16+ Monocyte	-0.689891	5.12629	15.3467	0.000274778	0.00230835
ARHGEF3	CD16+ Monocyte	0.760671	5.70801	15.3309	0.000276503	0.0023199
MSRA	CD16+ Monocyte	-0.502927	5.24401	15.3168	0.00027805	0.00232994
REX1BD	CD16+ Monocyte	-0.512328	6.50518	15.2752	0.000282515	0.00235843
AC009950.1	CD16+ Monocyte	0.864485	5.24197	15.2528	0.000285534	0.00236987
PIM1	CD16+ Monocyte	0.893272	5.98482	15.2393	0.000286796	0.00237626
TCF4	CD16+ Monocyte	0.812053	4.84437	15.2415	0.000287387	0.00237819
MRPL27	CD16+ Monocyte	0.52551	6.08564	15.1776	0.000293959	0.00241881
SDHAF1	CD16+ Monocyte	-0.544881	4.10356	15.0797	0.000307772	0.00251865
CD302	CD16+ Monocyte	-0.670373	7.25148	15.0348	0.000311368	0.00254153
BBC3	CD16+ Monocyte	0.733374	5.29007	15.0359	0.000311715	0.00254153
GPR155	CD16+ Monocyte	-0.602178	5.92575	15.0252	0.000312721	0.00254661
HSPA8	CD16+ Monocyte	-0.649201	8.91032	14.929	0.000325003	0.00263051
TMEM256	CD16+ Monocyte	-0.518731	5.69484	14.918	0.000326625	0.00264042
SPATA13	CD16+ Monocyte	0.531975	5.89569	14.8829	0.000331328	0.0026687
UBE2D1	CD16+ Monocyte	0.5231	6.85792	14.8362	0.000337575	0.00271244
STXBP2	CD16+ Monocyte	0.61152	9.19659	14.768	0.00034703	0.00277954
CR1	CD16+ Monocyte	-0.691475	4.92052	14.7644	0.000348843	0.00278948
LILRA5	CD16+ Monocyte	0.653339	7.97788	14.6811	0.000359562	0.00286486
ARHGEF40	CD16+ Monocyte	0.623804	5.69212	14.5179	0.000384628	0.00303185
UBE2L6	CD16+ Monocyte	1.02261	7.75736	14.4611	0.000393462	0.00309415
KNOP1	CD16+ Monocyte	-0.701219	4.43343	14.4687	0.000394001	0.00309473
MSR1	CD16+ Monocyte	1.53205	5.34868	14.4537	0.00039645	0.00310845
KDSR	CD16+ Monocyte	-0.662808	4.15357	14.4548	0.000396684	0.00310845
GNG2	CD16+ Monocyte	-0.619128	6.70809	14.4291	0.000398696	0.00312054
AMFR	CD16+ Monocyte	-0.596984	4.72391	14.4244	0.000400607	0.0031318
DCTN4	CD16+ Monocyte	0.506628	4.79499	14.4232	0.000401195	0.00313271
APOBR	CD16+ Monocyte	0.579328	5.86808	14.3422	0.000413469	0.0032097
SERPINB8	CD16+ Monocyte	0.625536	5.11344	14.3273	0.00041676	0.00323147
RPA1	CD16+ Monocyte	-0.581063	4.41233	14.3039	0.000421993	0.00326823
TTC3	CD16+ Monocyte	-0.560334	6.19444	14.259	0.000427641	0.00330044
SIRPB1	CD16+ Monocyte	0.8256	6.43912	14.2442	0.000430243	0.00331666
EHD4	CD16+ Monocyte	0.613562	5.28944	14.2289	0.000433443	0.00333746
GLT1D1	CD16+ Monocyte	0.828693	4.32343	14.2269	0.000435045	0.00334592
WDFY1	CD16+ Monocyte	0.669147	6.25812	14.1897	0.000440082	0.00337684
CWC22	CD16+ Monocyte	0.516204	5.24887	14.1734	0.00044351	0.00339922
CD1D	CD16+ Monocyte	0.68945	5.31556	14.1288	0.00045196	0.00345134
VMO1	CD16+ Monocyte	-1.67654	3.96807	14.1028	0.000452907	0.00345134
TMEM218	CD16+ Monocyte	-0.580843	4.331	14.1006	0.00045829	0.00348038
DUSP2	CD16+ Monocyte	1.31026	6.49402	14.0836	0.00046002	0.00348954
HSPA6	CD16+ Monocyte	0.759463	5.51773	14.0737	0.000462404	0.0035031
IMPACT	CD16+ Monocyte	-0.566822	4.23012	14.0403	0.000470408	0.00354488
CIITA	CD16+ Monocyte	-0.729171	5.5679	14.0291	0.000470517	0.00354488
GCLC	CD16+ Monocyte	-0.530798	4.65533	14.0152	0.0004744	0.00356605
BISPR	CD16+ Monocyte	0.710468	4.49927	13.8994	0.000498028	0.00371842
GOLIM4	CD16+ Monocyte	-0.582632	4.46685	13.8567	0.000507418	0.00378003
CARD6	CD16+ Monocyte	0.541259	5.22373	13.7977	0.000518753	0.00384293
TRIAP1	CD16+ Monocyte	0.586005	5.00753	13.7794	0.00052239	0.00386557
MEF2C	CD16+ Monocyte	-0.521165	7.39897	13.7679	0.000523878	0.00387227
STAT2	CD16+ Monocyte	0.784807	7.30134	13.735	0.000531116	0.00392141
CAT	CD16+ Monocyte	-0.538184	6.88562	13.7265	0.00053299	0.00393087
SLFN12	CD16+ Monocyte	0.704634	4.39595	13.7176	0.000533842	0.0039328
RPS4Y1	CD16+ Monocyte	-0.987454	6.94373	16.7787	0.000537018	0.00395181
HSPE1	CD16+ Monocyte	-0.584026	6.85713	13.6883	0.000541532	0.00398062
HIST1H1E	CD16+ Monocyte	0.759074	5.81406	13.6537	0.000551081	0.00404187
C15orf61	CD16+ Monocyte	-0.637813	4.31883	13.5982	0.000564547	0.00413055
LTA4H	CD16+ Monocyte	-0.760703	7.74886	13.5862	0.000565036	0.00413055
DUSP11	CD16+ Monocyte	0.559865	4.50617	13.5873	0.000567182	0.00414167
FLVCR2	CD16+ Monocyte	0.896258	4.24132	13.5838	0.000568001	0.0041431
HAVCR2	CD16+ Monocyte	0.526233	5.86441	13.5585	0.00057185	0.00415905
ZFP36L1	CD16+ Monocyte	0.634911	9.05218	13.5565	0.000572064	0.00415905
KIAA0319L	CD16+ Monocyte	0.541026	4.74321	13.5462	0.000576473	0.00417739
SESN3	CD16+ Monocyte	-0.741078	5.64483	13.5146	0.000582597	0.00421257
P2RY10	CD16+ Monocyte	-1.71987	2.97125	13.3168	0.000584349	0.00422065
DMWD	CD16+ Monocyte	-1.0047	3.37175	13.4866	0.000587202	0.00423666
EXOSC3	CD16+ Monocyte	0.579485	4.62161	13.5009	0.000587892	0.00423703
SNHG16	CD16+ Monocyte	-0.636128	5.31628	13.4843	0.000590046	0.00424335
MTMR11	CD16+ Monocyte	0.665966	6.09423	13.4269	0.00060409	0.00433965
ALPK1	CD16+ Monocyte	0.766211	5.24559	13.3718	0.000619074	0.00443291
MFSD5	CD16+ Monocyte	0.539329	4.0843	13.3698	0.000622177	0.0044493
NABP1	CD16+ Monocyte	0.675338	6.26062	13.3545	0.000622701	0.0044493
TUBA1B	CD16+ Monocyte	-0.510579	8.84752	13.3067	0.000635117	0.00452009
KLHDC4	CD16+ Monocyte	-0.733871	3.73538	13.2871	0.000644378	0.00457467
ICA1L	CD16+ Monocyte	-0.916762	4.07329	13.2249	0.000660684	0.00466056
CDK6	CD16+ Monocyte	-0.780826	5.24397	13.2092	0.000662504	0.00466199
AC007032.1	CD16+ Monocyte	1.00182	4.12174	13.1855	0.000672729	0.00471549
LILRB1	CD16+ Monocyte	0.631353	8.41552	13.1362	0.000682311	0.00477761
EIF4G3	CD16+ Monocyte	0.667642	4.55345	13.1283	0.000687341	0.00480665
ITFG2	CD16+ Monocyte	-0.771289	4.15736	13.1295	0.000687905	0.00480665
YBX3	CD16+ Monocyte	-0.511625	7.8784	13.1105	0.00068976	0.00481456
FKBP4	CD16+ Monocyte	-0.697164	4.86098	13.1051	0.000692737	0.0048252
NAGK	CD16+ Monocyte	0.651484	8.02236	12.9909	0.000725424	0.00503251
ATP13A1	CD16+ Monocyte	0.503328	5.40965	12.9881	0.000726844	0.00503637
STX17	CD16+ Monocyte	0.605774	5.03711	12.9705	0.0007336	0.00506207
TTC9C	CD16+ Monocyte	0.712439	4.59162	12.9325	0.000746341	0.00513399
CD84	CD16+ Monocyte	0.594245	5.13891	12.9196	0.000749239	0.0051486
CFAP97	CD16+ Monocyte	-0.547826	4.43068	12.915	0.000752073	0.0051574
MBD3	CD16+ Monocyte	-0.609682	4.12274	12.8506	0.000773619	0.00526172
HRAS	CD16+ Monocyte	-0.556108	4.42443	12.8224	0.000781507	0.00530213
EXOSC5	CD16+ Monocyte	-0.7239	4.16274	12.7699	0.000799805	0.00538471
IFT74	CD16+ Monocyte	0.700154	4.12032	12.7315	0.00081477	0.00546883
RAP2A	CD16+ Monocyte	-0.52926	4.77233	12.6713	0.000832563	0.00556716
STX3	CD16+ Monocyte	0.690443	4.17172	12.6343	0.000846113	0.00563934
LPAR6	CD16+ Monocyte	0.675948	7.15842	12.6109	0.000852336	0.00566728
RAB4A	CD16+ Monocyte	-0.501081	5.54646	12.6079	0.000853716	0.00566728
AL133330.1	CD16+ Monocyte	-0.812718	4.22423	12.6012	0.000857549	0.00568704
PRR7	CD16+ Monocyte	0.777003	4.17237	12.5118	0.000891504	0.00587092
CBR1	CD16+ Monocyte	0.746849	6.07518	12.5019	0.000893023	0.00587092
MRFAP1L1	CD16+ Monocyte	0.554531	4.10295	12.5052	0.000893031	0.00587092
WDR18	CD16+ Monocyte	-0.683504	4.1602	12.4847	0.000903027	0.00592361
RNF213	CD16+ Monocyte	0.5588	8.89194	12.4538	0.000911222	0.00597147
TMUB1	CD16+ Monocyte	0.52866	4.41875	12.4227	0.000926938	0.0060625
UPK3A	CD16+ Monocyte	1.21493	4.98462	12.4027	0.000933969	0.00610248
CARS2	CD16+ Monocyte	0.6673	6.41259	12.3506	0.000952501	0.00619312
NOM1	CD16+ Monocyte	-0.589584	4.35024	12.3564	0.000954242	0.00619837
CEP295	CD16+ Monocyte	0.599685	4.25629	12.3463	0.000957954	0.00621641
TREM1	CD16+ Monocyte	0.93708	6.32861	12.297	0.00097485	0.00631988
H1F0	CD16+ Monocyte	1.10743	5.02971	12.2682	0.000989241	0.00638205
CYB561A3	CD16+ Monocyte	-0.527739	4.88213	12.2597	0.000991509	0.00639047
IVD	CD16+ Monocyte	-0.730776	5.12997	12.25	0.000995523	0.00640972
PTPN7	CD16+ Monocyte	0.890261	3.78119	12.1971	0.00102089	0.00654175
BLZF1	CD16+ Monocyte	0.671509	4.59422	12.1689	0.00103346	0.00659685
TRIM25	CD16+ Monocyte	0.534943	5.67771	12.13	0.00104781	0.00667563
DSC2	CD16+ Monocyte	0.939941	4.09443	12.0495	0.00105152	0.00669287
CHERP	CD16+ Monocyte	-0.56832	4.13154	12.0473	0.00109005	0.00688533
CEACAM3	CD16+ Monocyte	1.61218	5.07016	12.0344	0.00109322	0.00689881
MAP3K13	CD16+ Monocyte	0.732626	4.10231	11.9952	0.00111489	0.00701153
CKB	CD16+ Monocyte	-1.0327	6.63742	11.9833	0.0011153	0.00701153
FCGR1A	CD16+ Monocyte	1.65355	5.83963	11.9667	0.00112428	0.0070546
SLFN5	CD16+ Monocyte	1.06449	6.85084	11.9175	0.00114738	0.00718599
FAM117B	CD16+ Monocyte	-0.602944	5.56621	11.8847	0.00116416	0.00727736
AL627171.2	CD16+ Monocyte	0.611732	4.66636	11.8803	0.00117153	0.00731654
ASGR1	CD16+ Monocyte	0.567318	6.2233	11.8632	0.00117474	0.00732321
SNHG3	CD16+ Monocyte	-0.535882	4.94967	11.8464	0.00118435	0.00735517
SFR1	CD16+ Monocyte	0.614582	4.18699	11.8362	0.00119349	0.00739808
MRPL46	CD16+ Monocyte	0.564449	4.28092	11.8299	0.00119709	0.00741345
PIP4P2	CD16+ Monocyte	0.606041	4.19239	11.7932	0.00121576	0.00750814
TAP1	CD16+ Monocyte	0.898931	6.8885	11.7234	0.00124787	0.0076637
SOX4	CD16+ Monocyte	-0.82371	5.26468	11.6921	0.00126633	0.00776987
CARD9	CD16+ Monocyte	-0.578996	5.41032	11.6843	0.00126979	0.0077839
C11orf54	CD16+ Monocyte	0.562985	4.29111	11.6517	0.001293	0.00790533
HLA-DPB1	CD16+ Monocyte	-0.80804	10.0161	11.6405	0.00129338	0.00790533
PTRH2	CD16+ Monocyte	0.623095	4.53588	11.6312	0.00130361	0.00794722
UPK3BL1	CD16+ Monocyte	-0.775405	4.51446	11.5803	0.00133172	0.00807418
AC007613.1	CD16+ Monocyte	0.922249	3.65849	11.5539	0.00133557	0.00808277
MRPL24	CD16+ Monocyte	-0.544724	4.03832	11.5618	0.00134413	0.00812109
P2RX7	CD16+ Monocyte	0.687731	5.73801	11.5521	0.00134508	0.00812109
MAPKAPK5-AS1	CD16+ Monocyte	-0.533911	4.61864	11.5463	0.00134999	0.00814035
NCF1	CD16+ Monocyte	1.09263	8.02119	11.5361	0.00135352	0.00815423
GCH1	CD16+ Monocyte	0.529605	7.2298	11.4974	0.00137657	0.00826315
TLR7	CD16+ Monocyte	1.05064	5.17211	11.4476	0.00140957	0.00840951
HPS5	CD16+ Monocyte	0.548534	4.92096	11.4376	0.00141564	0.00843671
HSPH1	CD16+ Monocyte	-0.760253	6.39144	11.3598	0.00146191	0.00865809
BRCA2	CD16+ Monocyte	0.960686	4.18531	11.3253	0.00148438	0.00876774
PID1	CD16+ Monocyte	-1.19745	4.62683	11.2787	0.0015181	0.00892724
AC100810.1	CD16+ Monocyte	-0.696343	4.29968	11.2757	0.00152106	0.00893675
NLN	CD16+ Monocyte	-0.71083	4.79757	11.226	0.00155304	0.00910852
LILRA1	CD16+ Monocyte	0.640084	7.5463	11.186	0.00157729	0.00924261
S100Z	CD16+ Monocyte	-0.584486	5.19114	11.1436	0.0016084	0.0094083
NUP62	CD16+ Monocyte	0.524157	5.50862	11.1238	0.001623	0.00948533
EXOSC9	CD16+ Monocyte	0.533733	5.00239	11.0377	0.00168658	0.00979664
SMC2	CD16+ Monocyte	-0.636902	4.35556	10.9874	0.00172581	0.00996353
GBA	CD16+ Monocyte	0.591327	4.38042	10.9683	0.00174169	0.0100291
ACOX1	CD16+ Monocyte	-0.539471	4.50637	10.9531	0.00175273	0.0100665
HES4	CD16+ Monocyte	0.860722	8.13641	10.9403	0.00175729	0.0100839
ELP2	CD16+ Monocyte	-0.686495	5.04758	10.9325	0.00176521	0.0101206
MINDY2	CD16+ Monocyte	0.573474	4.7175	10.8994	0.00179357	0.0102567
ACTR1B	CD16+ Monocyte	-0.569775	4.08756	10.8797	0.00181226	0.0103457
ANKRA2	CD16+ Monocyte	0.517847	4.29263	10.8757	0.00181464	0.0103504
XIST	CD16+ Monocyte	-0.606384	7.75698	12.1266	0.00188193	0.0106793
CDC14A	CD16+ Monocyte	-0.69706	4.60016	10.7825	0.00188886	0.0107003
TSPAN3	CD16+ Monocyte	-0.554704	4.73795	10.7352	0.0019272	0.0108804
TMLHE	CD16+ Monocyte	-0.501107	4.47253	10.7203	0.00194256	0.0109578
CERK	CD16+ Monocyte	-0.503325	6.01121	10.6907	0.00196292	0.0110385
NAIP	CD16+ Monocyte	0.883249	5.75544	10.6932	0.00196352	0.0110385
GAPT	CD16+ Monocyte	0.571599	6.46174	10.6851	0.00196766	0.0110525
WDR11	CD16+ Monocyte	-0.538171	6.57292	10.6664	0.00198391	0.0111314
CCL4L2	CD16+ Monocyte	3.94797	4.84422	10.4284	0.00198505	0.0111314
CMKLR1	CD16+ Monocyte	0.966143	4.80489	10.6401	0.00200977	0.011251
SULF2	CD16+ Monocyte	-0.531167	6.61763	10.6231	0.00202246	0.0113025
CNN2	CD16+ Monocyte	-0.541451	6.49863	10.6087	0.00203547	0.0113375
CD36	CD16+ Monocyte	0.577178	7.36896	10.597	0.0020461	0.0113785
CD9	CD16+ Monocyte	2.03761	3.8344	10.526	0.00204625	0.0113785
KMO	CD16+ Monocyte	0.603399	4.36671	10.5939	0.00205565	0.0114117
TNNT1	CD16+ Monocyte	1.96795	4.49838	10.5548	0.00208285	0.0115338
RETN	CD16+ Monocyte	1.45053	6.37677	10.5176	0.00212041	0.011732
CNIH4	CD16+ Monocyte	0.684738	7.30941	10.4788	0.00215647	0.0118532
AL450998.2	CD16+ Monocyte	0.698136	4.0976	10.4896	0.00215658	0.0118532
PRKRA	CD16+ Monocyte	-0.605121	4.33119	10.453	0.00218747	0.01195
GBP1	CD16+ Monocyte	1.35214	8.16498	10.4195	0.00221422	0.0120701
GIMAP5	CD16+ Monocyte	1.03123	5.10926	10.359	0.00227904	0.0123525
PARP8	CD16+ Monocyte	0.869177	3.91258	10.3482	0.00228229	0.0123601
ABCB7	CD16+ Monocyte	-0.549233	4.4011	10.312	0.00232938	0.0125933
PISD	CD16+ Monocyte	0.506182	4.86766	10.3047	0.00233389	0.0125933
HCP5	CD16+ Monocyte	0.670735	4.61426	10.2772	0.00236557	0.012739
SQLE	CD16+ Monocyte	0.901957	4.64247	10.2758	0.00236568	0.012739
PRKD2	CD16+ Monocyte	0.522132	3.96314	10.2006	0.00245366	0.0131594
AIG1	CD16+ Monocyte	-0.591076	4.74178	10.1152	0.00254058	0.0135697
ENDOG	CD16+ Monocyte	-0.544436	4.36029	10.1107	0.00254823	0.013579
VNN2	CD16+ Monocyte	1.45496	4.55957	10.0579	0.00261113	0.0138365
ANKRD28	CD16+ Monocyte	0.721004	4.38241	10.0335	0.00264098	0.013928
ADAM15	CD16+ Monocyte	-0.772757	4.61129	10.008	0.00266826	0.0140385
EPS8	CD16+ Monocyte	-0.641598	5.26856	9.99286	0.00268257	0.0140915
UBE2S	CD16+ Monocyte	0.502775	6.02211	9.97446	0.00270411	0.0141822
POLD2	CD16+ Monocyte	-0.611798	3.80275	9.97357	0.00271637	0.0142352
GADD45A	CD16+ Monocyte	0.82091	3.69695	9.92187	0.00277359	0.0144894
PPM1L	CD16+ Monocyte	-0.591527	5.13082	9.91578	0.00277929	0.0145078
NCF4	CD16+ Monocyte	0.611959	6.20086	9.87371	0.0028299	0.0147257
PSMB9	CD16+ Monocyte	0.613345	9.02015	9.86118	0.0028454	0.0147716
SLC35E3	CD16+ Monocyte	0.555243	5.11635	9.86096	0.00284923	0.014773
COQ7	CD16+ Monocyte	0.631328	4.82259	9.7838	0.00295094	0.0151655
HAUS4	CD16+ Monocyte	-0.555654	4.57872	9.75988	0.00298442	0.0152848
DYRK2	CD16+ Monocyte	-0.532202	4.7852	9.75197	0.00299465	0.0152966
CCDC71L	CD16+ Monocyte	0.648269	4.20804	9.75594	0.00299467	0.0152966
F11R	CD16+ Monocyte	0.615148	4.68691	9.73743	0.00301395	0.0153705
LIPN	CD16+ Monocyte	0.749885	4.21217	9.70623	0.0030613	0.0156
NISCH	CD16+ Monocyte	0.530597	4.00973	9.66951	0.00311444	0.0158073
TRMT1L	CD16+ Monocyte	0.525546	4.45457	9.65083	0.00313897	0.015874
TBCC	CD16+ Monocyte	0.52056	4.80225	9.64304	0.00314554	0.0158879
ATP2B1-AS1	CD16+ Monocyte	0.660133	8.11172	9.63386	0.00315441	0.0158916
FAM98A	CD16+ Monocyte	0.616653	3.87814	9.63412	0.00315705	0.0158929
C11orf71	CD16+ Monocyte	0.688871	3.74328	9.63105	0.00317126	0.0159282
CHST2	CD16+ Monocyte	-0.757506	5.6089	9.61345	0.00318506	0.0159734
SNHG25	CD16+ Monocyte	-0.836992	4.25724	9.60614	0.00320469	0.0160597
COQ4	CD16+ Monocyte	-0.583338	3.96944	9.60345	0.0032102	0.0160752
CA5B	CD16+ Monocyte	-0.500038	4.51848	9.58062	0.00323865	0.0162054
TSPAN32	CD16+ Monocyte	-0.572643	5.4289	9.47549	0.00339195	0.0168583
S100A12	CD16+ Monocyte	1.04161	4.51067	9.34137	0.00359458	0.0176933
CCZ1B	CD16+ Monocyte	-0.931609	4.01669	9.32597	0.00361324	0.017772
CXCL8	CD16+ Monocyte	1.33871	7.14733	9.32906	0.00362576	0.0177949
CYBRD1	CD16+ Monocyte	-1.24475	4.82386	9.31353	0.00365683	0.0179063
STAT1	CD16+ Monocyte	0.933058	8.01555	9.28538	0.00369859	0.0180582
SNTB1	CD16+ Monocyte	0.671025	4.22465	9.27031	0.00373269	0.0181845
SBNO2	CD16+ Monocyte	0.569307	4.93277	9.2638	0.00374021	0.0182078
GPKOW	CD16+ Monocyte	0.520847	4.18016	9.23415	0.00379892	0.0184396
PRR5	CD16+ Monocyte	-1.07142	4.32374	9.14505	0.00394837	0.018971
BAIAP2	CD16+ Monocyte	0.628101	4.34605	9.14375	0.0039568	0.0189841
CHN2	CD16+ Monocyte	-0.615315	4.61493	9.05799	0.00411264	0.0195903
MBNL3	CD16+ Monocyte	-0.517315	4.43804	9.0205	0.00418885	0.0198821
AC091271.1	CD16+ Monocyte	0.761032	4.20637	9.00747	0.0042166	0.0199568
TPCN2	CD16+ Monocyte	0.587906	4.38587	8.95044	0.00432664	0.0204194
GBP3	CD16+ Monocyte	0.674239	4.95471	8.93855	0.00434695	0.0204717
SLC39A13	CD16+ Monocyte	0.564568	3.75072	8.93918	0.00435407	0.0204907
RTN1	CD16+ Monocyte	-0.773869	4.44118	8.81022	0.00461308	0.0215266
BST2	CD16+ Monocyte	0.538402	8.46679	8.75375	0.00472746	0.0219218
ITPRIP	CD16+ Monocyte	0.528818	4.37897	8.72944	0.00479129	0.022156
SIPA1L2	CD16+ Monocyte	0.616633	4.08387	8.72042	0.00480474	0.0221873
SUN1	CD16+ Monocyte	-0.5412	4.07053	8.72177	0.00481277	0.0222089
LETMD1	CD16+ Monocyte	-0.53208	4.55915	8.71536	0.00481957	0.0222249
LUCAT1	CD16+ Monocyte	1.35433	3.77949	8.68124	0.00485291	0.0223321
PRR11	CD16+ Monocyte	-0.587894	4.02224	8.62648	0.00503285	0.022875
PARP11	CD16+ Monocyte	0.671924	4.32358	8.56453	0.00517429	0.0233265
PDE3B	CD16+ Monocyte	-0.571502	4.43453	8.54784	0.00521389	0.0233793
RBFA	CD16+ Monocyte	-0.55282	3.9308	8.54448	0.00522892	0.0234091
SMPDL3A	CD16+ Monocyte	0.703565	5.20405	8.53782	0.00523151	0.0234091
MAFF	CD16+ Monocyte	1.21715	3.38513	8.51961	0.00523843	0.0234091
FCGR2B	CD16+ Monocyte	0.97303	5.22562	8.52447	0.00526913	0.0235147
SNHG8	CD16+ Monocyte	-0.634331	6.76588	8.47399	0.00538679	0.0238906
NBPF10	CD16+ Monocyte	0.552976	4.59643	8.47047	0.00540867	0.0239174
ICAM1	CD16+ Monocyte	0.684675	5.24734	8.43798	0.00548212	0.0241795
HELB	CD16+ Monocyte	0.811316	3.97679	8.44297	0.00548359	0.0241795
JAK3	CD16+ Monocyte	0.516828	5.66377	8.40118	0.00557585	0.0245537
ACOT13	CD16+ Monocyte	0.603136	4.34703	8.36192	0.0056908	0.0249558
PHACTR2	CD16+ Monocyte	0.562994	5.81877	8.34458	0.00572572	0.0250312
PPM1D	CD16+ Monocyte	0.507928	4.01576	8.27647	0.00592792	0.0257795
PCBD1	CD16+ Monocyte	-0.512976	4.42926	8.27116	0.00593396	0.0257889
TARSL2	CD16+ Monocyte	-0.561101	3.71515	8.26964	0.00595006	0.0258263
FRY	CD16+ Monocyte	-0.593145	5.60988	8.22638	0.00605316	0.0262383
ABCC3	CD16+ Monocyte	-0.724225	5.25199	8.18619	0.00616974	0.0266393
SLC25A45	CD16+ Monocyte	-0.565301	4.07844	8.17518	0.00621469	0.0267829
MLKL	CD16+ Monocyte	0.656117	5.3192	8.15885	0.00625208	0.0269074
KNDC1	CD16+ Monocyte	-1.27322	3.41568	8.14217	0.00627188	0.0269403
LINC00173	CD16+ Monocyte	0.621045	4.52683	8.14944	0.00628445	0.0269421
LINC01503	CD16+ Monocyte	-0.56928	4.32736	8.09766	0.00644127	0.027398
GIMAP6	CD16+ Monocyte	0.642982	5.67872	8.06688	0.00652848	0.027617
GLMP	CD16+ Monocyte	0.649939	4.47331	8.05678	0.00656776	0.0277273
STK17A	CD16+ Monocyte	0.545117	4.64517	8.02899	0.00665114	0.0280081
RABGAP1L	CD16+ Monocyte	0.599326	8.35855	7.97814	0.00680475	0.0285284
LILRA6	CD16+ Monocyte	0.754495	5.54003	7.97217	0.00682733	0.028587
MGST1	CD16+ Monocyte	0.832271	3.7618	7.95017	0.00690362	0.0287608
MMP17	CD16+ Monocyte	0.623856	4.33436	7.90504	0.00706055	0.0291956
SELENOO	CD16+ Monocyte	0.513217	4.2517	7.87942	0.00714763	0.0294903
KIAA0040	CD16+ Monocyte	0.821561	4.21799	7.86279	0.00719879	0.0296516
DDIT4	CD16+ Monocyte	1.43611	5.23064	7.85926	0.00720653	0.0296516
HEBP2	CD16+ Monocyte	0.533091	6.75582	7.82364	0.00732395	0.0300047
HDAC9	CD16+ Monocyte	-0.789839	5.27499	7.80326	0.00739831	0.0301991
FCGR3B	CD16+ Monocyte	2.2128	6.55665	7.80311	0.00739856	0.0301991
CHST12	CD16+ Monocyte	0.611966	3.78972	7.72353	0.00769104	0.0311502
RBM43	CD16+ Monocyte	0.587258	4.41187	7.72234	0.00769648	0.0311502
MZF1-AS1	CD16+ Monocyte	0.656366	4.12707	7.66937	0.00769732	0.0311502
FCGR1B	CD16+ Monocyte	1.09056	5.292	7.70307	0.00776327	0.0313598
MRPL49	CD16+ Monocyte	0.526395	3.9576	7.60265	0.00816274	0.0326952
SLC22A18	CD16+ Monocyte	0.658214	4.25856	7.55965	0.00832666	0.033201
SIRPA	CD16+ Monocyte	0.545938	4.67589	7.55783	0.00832897	0.033201
NTNG2	CD16+ Monocyte	0.951923	3.45536	7.50931	0.00848992	0.0336809
ICAM4	CD16+ Monocyte	-0.695109	5.33569	7.50404	0.00853717	0.0338078
PPIF	CD16+ Monocyte	0.606257	5.30855	7.47819	0.00864719	0.0341215
AC012368.1	CD16+ Monocyte	0.747964	4.5902	7.44039	0.00881359	0.0346457
THG1L	CD16+ Monocyte	-0.51021	4.27171	7.43335	0.00884455	0.0346918
VASH1	CD16+ Monocyte	-0.971966	4.69485	7.40432	0.00896193	0.0350512
GK	CD16+ Monocyte	0.592757	4.79577	7.38928	0.00902776	0.0352672
ELL2	CD16+ Monocyte	0.530748	3.88737	7.38719	0.00905123	0.0352966
ADGRE1	CD16+ Monocyte	-0.760495	5.76773	7.30962	0.00937467	0.0364296
DHRS4L2	CD16+ Monocyte	-0.506524	5.39887	7.20729	0.00985165	0.0379943
LRR1	CD16+ Monocyte	0.554125	3.95929	7.19061	0.00995628	0.0383089
SASH1	CD16+ Monocyte	-0.662789	5.43364	7.17631	0.0100034	0.038468
IRS2	CD16+ Monocyte	-0.712099	5.95624	7.11348	0.0103099	0.0393056
XYLT1	CD16+ Monocyte	-0.602508	5.00338	7.1116	0.0103251	0.0393407
SNRNP25	CD16+ Monocyte	-0.525216	4.98767	7.11007	0.0103313	0.0393417
NDUFAF1	CD16+ Monocyte	0.542247	4.056	7.11172	0.0103434	0.0393654
APOL1	CD16+ Monocyte	0.739995	4.48781	7.0856	0.0104663	0.0397422
BCL2A1	CD16+ Monocyte	0.607337	8.5913	6.99109	0.0109419	0.0411716
LINC01506	CD16+ Monocyte	0.658786	4.22467	6.98006	0.0110169	0.0413599
GADD45B	CD16+ Monocyte	0.549241	7.36425	6.94457	0.0111937	0.0419053
REC8	CD16+ Monocyte	0.700151	4.4865	6.92013	0.0113451	0.0423766
IL1B	CD16+ Monocyte	1.11127	8.29144	6.82541	0.0118666	0.0438805
AL158152.1	CD16+ Monocyte	-0.532702	4.32881	6.82224	0.0119034	0.0439921
RUVBL1	CD16+ Monocyte	-0.51162	4.31176	6.81707	0.0119339	0.0440804
ATF3	CD16+ Monocyte	0.710871	6.3065	6.77542	0.0121631	0.0447529
CEACAM4	CD16+ Monocyte	0.604648	4.21438	6.76712	0.0122249	0.0449554
CPSF1	CD16+ Monocyte	-0.513801	3.91047	6.71942	0.0125267	0.0458117
NFIL3	CD16+ Monocyte	0.651409	5.92365	6.71295	0.0125424	0.0458327
SH3RF1	CD16+ Monocyte	-0.684125	4.28055	6.70967	0.0125795	0.0458535
CCL3L1	CD16+ Monocyte	2.32426	6.01251	6.62282	0.0131281	0.0472825
RNASE6	CD16+ Monocyte	0.890841	4.68342	6.56294	0.0133854	0.048079
PPM1N	CD16+ Monocyte	-0.724241	5.87091	6.54844	0.0136042	0.048733
XAF1	CD56dim NK	2.31608	8.82155	64.2381	5.07255e-11	1.95868e-07
MX1	CD56dim NK	3.60206	7.8618	62.0909	8.60393e-11	1.95868e-07
IFI44L	CD56dim NK	5.26133	7.75114	52.1647	1.14025e-09	1.73053e-06
RSAD2	CD56dim NK	4.07375	5.95367	49.1757	2.61406e-09	2.0071e-06
OASL	CD56dim NK	2.73466	5.52257	48.6978	2.94279e-09	2.0071e-06
MT-CYB	CD56dim NK	-1.1824	12.3323	48.6163	2.97301e-09	2.0071e-06
TYMP	CD56dim NK	2.20613	6.97862	48.4041	3.15834e-09	2.0071e-06
HERC6	CD56dim NK	2.26878	5.4129	48.0672	3.52664e-09	2.0071e-06
EIF2AK2	CD56dim NK	1.95943	7.76903	46.1787	5.92998e-09	2.99991e-06
IFI6	CD56dim NK	3.44598	8.37645	44.9785	8.38024e-09	3.81552e-06
OAS3	CD56dim NK	3.3687	4.83166	44.3011	1.06152e-08	4.39373e-06
NMI	CD56dim NK	0.911022	6.79507	43.532	1.27929e-08	4.73928e-06
N4BP1	CD56dim NK	0.823016	6.74243	43.1061	1.45043e-08	4.73928e-06
OAS1	CD56dim NK	2.73487	6.5016	42.2025	1.90038e-08	5.28651e-06
LGALS9	CD56dim NK	1.41458	6.23823	42.1016	1.95651e-08	5.28651e-06
IFIT3	CD56dim NK	3.7515	6.50337	42.0845	1.97388e-08	5.28651e-06
IFIT1	CD56dim NK	5.12284	5.91079	41.4912	2.24609e-08	5.68135e-06
MX2	CD56dim NK	3.13163	6.1706	41.4409	2.39113e-08	5.7299e-06
IFIH1	CD56dim NK	1.46513	5.20988	41.09	2.67208e-08	5.73871e-06
OAS2	CD56dim NK	1.78236	6.72389	40.9565	2.75821e-08	5.73871e-06
MT-ND5	CD56dim NK	-0.757748	10.9593	40.2044	3.46038e-08	6.57828e-06
USP18	CD56dim NK	2.30255	5.2083	40.2018	3.5167e-08	6.57828e-06
RTP4	CD56dim NK	1.31447	4.73338	40.1331	3.61206e-08	6.57828e-06
MT-ATP6	CD56dim NK	-0.811098	13.4642	39.8956	3.80228e-08	6.65838e-06
PTGDR	CD56dim NK	-0.72006	7.54859	39.4721	4.33039e-08	7.26097e-06
EPSTI1	CD56dim NK	1.79594	7.35429	39.3726	4.46534e-08	7.26097e-06
SP110	CD56dim NK	0.938351	7.7158	38.9768	5.04298e-08	7.91748e-06
ZBP1	CD56dim NK	0.940754	6.71968	38.8593	5.2324e-08	7.94104e-06
ADAR	CD56dim NK	0.883043	7.98054	37.3128	8.46561e-08	1.20668e-05
IRF7	CD56dim NK	2.03318	7.26226	37.3085	8.48098e-08	1.20668e-05
IFIT2	CD56dim NK	1.6394	5.45433	36.7848	1.00499e-07	1.38658e-05
MT-ND4	CD56dim NK	-0.793585	12.3053	36.4619	1.10726e-07	1.48275e-05
SPATS2L	CD56dim NK	2.26359	4.38632	36.2558	1.21996e-07	1.56739e-05
IFI35	CD56dim NK	1.3337	7.30132	36.1087	1.23932e-07	1.56739e-05
IFI44	CD56dim NK	2.8339	5.94639	35.7368	1.4098e-07	1.73481e-05
EEF1B2	CD56dim NK	-0.525522	9.38328	34.8497	1.85508e-07	2.11155e-05
EEF1G	CD56dim NK	-0.528563	9.19824	34.6902	1.95324e-07	2.16905e-05
PAXX	CD56dim NK	-0.507859	8.05048	33.4803	2.89741e-07	3.14093e-05
SAMD9	CD56dim NK	0.983294	8.25889	33.2737	3.10073e-07	3.28317e-05
IFIT5	CD56dim NK	1.36356	5.11553	32.9652	3.47415e-07	3.5156e-05
MT-CO3	CD56dim NK	-0.72667	13.3023	32.9003	3.50633e-07	3.5156e-05
RPS3A	CD56dim NK	-0.542593	11.2672	32.8612	3.55189e-07	3.5156e-05
PARP9	CD56dim NK	1.59296	6.83115	32.7836	3.64678e-07	3.53272e-05
SAMD9L	CD56dim NK	1.1535	7.88827	32.6665	3.789e-07	3.59402e-05
AZI2	CD56dim NK	0.827531	5.53157	32.3618	4.20315e-07	3.82739e-05
SHISA5	CD56dim NK	0.685534	7.38129	31.9638	4.78698e-07	3.98059e-05
MT-CO1	CD56dim NK	-0.71218	13.6346	31.9586	4.79392e-07	3.98059e-05
DDX60	CD56dim NK	1.1382	6.2581	31.9604	4.7964e-07	3.98059e-05
DDX60L	CD56dim NK	1.20858	6.28783	31.9503	4.81254e-07	3.98059e-05
SP100	CD56dim NK	0.976665	8.76578	31.839	4.98959e-07	3.98554e-05
PLSCR1	CD56dim NK	1.69584	6.93113	31.7406	5.15975e-07	4.03232e-05
CMPK2	CD56dim NK	3.10333	5.05058	31.0722	6.57822e-07	4.99177e-05
DDX58	CD56dim NK	0.926217	6.05075	30.809	7.06547e-07	5.27362e-05
RPL5	CD56dim NK	-0.538547	10.2905	30.6416	7.46809e-07	5.48423e-05
TMEM123	CD56dim NK	1.07061	7.01591	30.5804	7.62786e-07	5.51264e-05
TAP1	CD56dim NK	0.76084	7.46352	30.1039	8.96983e-07	6.30673e-05
CD79B	CD56dim NK	0.904833	5.62642	30.0993	9.00368e-07	6.30673e-05
ISG15	CD56dim NK	2.38253	9.45692	30.0135	9.24921e-07	6.37547e-05
PARP12	CD56dim NK	1.13703	5.34159	29.9837	9.38188e-07	6.37547e-05
TRIM22	CD56dim NK	1.08723	7.86795	29.8626	9.74069e-07	6.40999e-05
ISG20	CD56dim NK	1.69027	8.69654	29.8301	9.84855e-07	6.40999e-05
PHF11	CD56dim NK	0.773315	6.96565	29.8293	9.85503e-07	6.40999e-05
MATK	CD56dim NK	-0.515466	8.61091	29.588	1.07015e-06	6.86255e-05
IRF9	CD56dim NK	0.885994	7.73509	29.3036	1.18034e-06	7.46404e-05
HERC5	CD56dim NK	1.83031	5.646	28.7306	1.44295e-06	8.94396e-05
HOPX	CD56dim NK	-0.684308	9.65783	28.7014	1.45366e-06	8.94396e-05
DTX3L	CD56dim NK	0.991197	6.66921	28.2383	1.7092e-06	0.00010376
ANXA2R	CD56dim NK	-0.878352	6.20688	28.184	1.74296e-06	0.000104354
ITGAE	CD56dim NK	-0.725797	5.68316	28.1526	1.76483e-06	0.000104354
HELZ2	CD56dim NK	1.28193	5.71479	27.4595	2.2493e-06	0.000128013
MT-CO2	CD56dim NK	-0.58181	13.4657	27.2672	2.40315e-06	0.000135081
IFI16	CD56dim NK	0.695937	9.05285	27.085	2.56331e-06	0.000142326
LY6E	CD56dim NK	1.17256	9.69108	27.0059	2.63626e-06	0.000144613
CTSS	CD56dim NK	0.524906	7.59872	26.5606	3.08938e-06	0.000167452
TNFSF10	CD56dim NK	1.22169	6.37821	26.1497	3.58067e-06	0.000189567
SMG7	CD56dim NK	0.544437	5.51005	26.0248	3.75113e-06	0.000196309
STAT1	CD56dim NK	1.43628	7.31933	25.871	3.95622e-06	0.00020469
CHMP5	CD56dim NK	0.781499	6.72342	25.8342	4.00965e-06	0.000205123
MRPS18B	CD56dim NK	0.590006	5.87004	24.7591	5.92722e-06	0.000287092
PALM2-AKAP2	CD56dim NK	1.02509	6.16591	24.699	6.05759e-06	0.000290318
MT-ND1	CD56dim NK	-0.566869	11.8082	24.0693	7.6256e-06	0.000357931
LAP3	CD56dim NK	0.943297	6.50791	23.7624	8.5456e-06	0.000385229
BST2	CD56dim NK	1.02505	8.89616	23.6009	9.06852e-06	0.00040329
MYD88	CD56dim NK	0.643913	5.594	22.9818	1.14413e-05	0.000496117
TRIM25	CD56dim NK	0.769552	5.19784	22.3525	1.45232e-05	0.000601127
ZNFX1	CD56dim NK	0.713654	5.36979	22.0629	1.61909e-05	0.000658188
STAT2	CD56dim NK	1.08033	6.01449	21.3584	2.11325e-05	0.000844001
TAP2	CD56dim NK	0.680375	6.41862	21.2852	2.1724e-05	0.000860083
GLIPR1	CD56dim NK	-0.533181	6.78417	20.8114	2.60634e-05	0.00100565
NT5C3A	CD56dim NK	1.00701	6.24605	20.736	2.68384e-05	0.00101967
SHFL	CD56dim NK	0.656299	6.96422	20.7316	2.68746e-05	0.00101967
PML	CD56dim NK	0.798768	5.25394	20.4637	2.98741e-05	0.00112411
UBE2L6	CD56dim NK	0.839789	7.3898	19.7079	4.00232e-05	0.00144623
WARS	CD56dim NK	1.23308	4.84297	19.1175	5.07444e-05	0.001791
LGALS8	CD56dim NK	0.519045	5.55844	19.0211	5.25351e-05	0.00182589
AC009950.1	CD56dim NK	1.01368	4.94443	18.7473	5.86707e-05	0.00199349
PNPT1	CD56dim NK	0.72459	5.4575	18.588	6.24071e-05	0.00207401
ZCCHC2	CD56dim NK	0.774585	5.76527	18.518	6.41221e-05	0.00210034
YPEL3	CD56dim NK	-0.55724	7.73836	18.1739	7.35343e-05	0.00232501
MRPL49	CD56dim NK	0.532641	5.01405	17.98	7.97147e-05	0.0024859
CNP	CD56dim NK	0.592765	5.31377	17.9266	8.13394e-05	0.00251931
IFITM3	CD56dim NK	1.36565	7.98534	17.709	8.86664e-05	0.00270938
MT-ND2	CD56dim NK	-0.507694	11.1965	17.6815	8.96531e-05	0.00272127
PARP14	CD56dim NK	0.812207	7.60413	17.4407	9.88434e-05	0.00290344
LGALS1	CD56dim NK	0.990107	9.24097	17.3025	0.000104544	0.00303178
IFITM1	CD56dim NK	0.966937	9.90542	16.7838	0.000129206	0.00358704
JAK2	CD56dim NK	0.614614	5.15628	16.6204	0.000138462	0.00379771
C12orf57	CD56dim NK	-0.507196	7.4047	16.4699	0.00014701	0.00393727
GBP1	CD56dim NK	1.31995	5.75582	16.0535	0.000174753	0.0044952
SCO2	CD56dim NK	0.842589	5.15496	15.8829	0.000187824	0.0048043
SP140	CD56dim NK	0.504972	6.14561	15.6207	0.000209156	0.00526126
PPM1K	CD56dim NK	0.675925	6.80929	14.9498	0.000277192	0.00650544
IL18R1	CD56dim NK	0.959565	5.34599	14.2883	0.000367468	0.00804365
RNF138	CD56dim NK	0.536281	5.22747	14.1839	0.00038447	0.00829618
S100A11	CD56dim NK	0.736763	8.78747	13.7909	0.000454427	0.00953459
ZBTB43	CD56dim NK	0.578218	5.10133	13.7177	0.00046993	0.00981465
SLFN5	CD56dim NK	0.594775	8.813	13.395	0.000539294	0.0111104
IL10RB	CD56dim NK	0.502327	5.52625	12.989	0.000644199	0.0125881
TRIM14	CD56dim NK	0.523773	5.56928	12.8635	0.00068045	0.0130802
DOP1A	CD56dim NK	0.521424	4.80863	12.8661	0.000680872	0.0130802
MT-ATP8	CD56dim NK	-0.696191	7.13834	12.7947	0.000700946	0.0132975
TRIM69	CD56dim NK	0.887555	4.87015	12.2994	0.000873617	0.0155374
CBR4	CD56dim NK	-0.547458	5.65568	11.8862	0.00104809	0.0178058
ZNF107	CD56dim NK	0.505562	5.0171	11.6568	0.00116252	0.0191282
HSH2D	CD56dim NK	0.557561	7.17535	11.5084	0.0012408	0.0201045
FGFBP2	CD56dim NK	-0.661126	10.4123	11.4701	0.0012623	0.0202368
MT-ND3	CD56dim NK	-0.527782	12.421	11.2642	0.00138506	0.0214496
HES4	CD56dim NK	1.56475	5.11201	11.1439	0.00146605	0.0223241
KLRB1	CD56dim NK	-0.560255	10.4807	10.9949	0.00156475	0.0235126
TNFSF14	CD56dim NK	0.588228	5.08584	10.9603	0.00159149	0.0235888
KANSL1-AS1	CD56dim NK	-1.20985	5.33522	10.9164	0.00162394	0.0237742
TRAFD1	CD56dim NK	0.533365	5.18016	10.8521	0.00167146	0.0242362
MT2A	CD56dim NK	1.11264	8.34903	10.6217	0.00185498	0.0263107
DAB2	CD56dim NK	-0.521315	6.4314	10.4309	0.00202493	0.0281082
CD38	CD56dim NK	0.588272	8.04178	10.083	0.00237686	0.0321123
MT1X	CD56dim NK	0.600247	5.23368	9.95147	0.00252884	0.033568
VIM	CD56dim NK	0.543039	8.28734	9.79629	0.0027152	0.0351202
MARCKSL1	CD56dim NK	-0.540949	5.66856	9.7866	0.00272894	0.0351979
BCL2	CD56dim NK	0.774224	5.19067	9.63902	0.0029243	0.0368818
TRIM21	CD56dim NK	0.521404	5.02422	9.57416	0.00301548	0.037615
FBXO6	CD56dim NK	0.527936	6.58596	9.13387	0.00370489	0.0441581
HLA-DRB1	CD56dim NK	1.23608	5.32811	8.97077	0.00400584	0.0468858
MX1	CD56bright NK	3.44921	7.21635	58.9005	4.22251e-10	1.24847e-06
MX2	CD56bright NK	2.94509	5.91022	58.0034	5.07406e-10	1.24847e-06
XAF1	CD56bright NK	2.45354	8.39088	47.9665	6.45818e-09	1.05936e-05
RSAD2	CD56bright NK	3.17415	5.242	44.3561	9.63358e-09	1.18517e-05
EPSTI1	CD56bright NK	1.98522	7.05169	44.2147	1.78749e-08	1.70087e-05
OAS3	CD56bright NK	2.38895	5.15785	43.0778	2.23946e-08	1.70087e-05
IFI6	CD56bright NK	2.7908	7.30159	43.1307	2.41945e-08	1.70087e-05
IFI44L	CD56bright NK	4.37138	8.08323	42.2936	3.06497e-08	1.88534e-05
SAMD9	CD56bright NK	1.06073	7.34261	41.451	3.86997e-08	1.91489e-05
OAS2	CD56bright NK	1.94593	6.21795	41.4912	3.89125e-08	1.91489e-05
EEF1G	CD56bright NK	-0.553276	10.1435	41.0767	4.29723e-08	1.92242e-05
TRIM22	CD56bright NK	1.41653	6.59819	39.3872	7.06605e-08	2.67477e-05
TYMP	CD56bright NK	1.88911	6.3218	39.0095	7.9385e-08	2.79038e-05
EIF2AK2	CD56bright NK	1.70445	7.36478	38.3488	9.51326e-08	3.03857e-05
PARP9	CD56bright NK	1.6637	6.18933	38.27	9.87953e-08	3.03857e-05
OAS1	CD56bright NK	2.7487	5.63283	36.3907	1.65194e-07	4.66634e-05
MT-CYB	CD56bright NK	-0.853177	12.427	36.38	1.70685e-07	4.66634e-05
SAMD9L	CD56bright NK	1.38965	7.12965	36.1581	1.83135e-07	4.7432e-05
IRF7	CD56bright NK	1.87355	6.56143	34.4062	3.14386e-07	7.73547e-05
LGALS9	CD56bright NK	1.45417	5.82069	33.3193	4.44808e-07	0.000104233
OASL	CD56bright NK	2.13247	5.06084	31.8665	6.58669e-07	0.000140927
MT-CO3	CD56bright NK	-0.621314	13.6353	30.7964	9.76737e-07	0.000200272
PALM2-AKAP2	CD56bright NK	1.45011	5.82442	28.5675	2.0667e-06	0.000391163
PLSCR1	CD56bright NK	1.61682	6.53033	27.8508	2.599e-06	0.000473692
IFITM3	CD56bright NK	1.00658	8.79429	26.6861	3.83174e-06	0.000650207
ADAR	CD56bright NK	0.825977	7.63086	26.3309	4.32993e-06	0.000708461
ISG20	CD56bright NK	1.26271	8.52202	25.7705	5.25087e-06	0.000783015
CSKMT	CD56bright NK	1.33652	5.26297	25.3931	5.6672e-06	0.000820243
IFI44	CD56bright NK	2.0739	6.0055	25.0145	6.85823e-06	0.000964267
SP100	CD56bright NK	0.878362	8.49035	24.7394	7.52334e-06	0.0010284
LY6E	CD56bright NK	0.982967	9.2653	23.9104	1.00833e-05	0.00130579
IFI35	CD56bright NK	1.20723	6.64781	23.7213	1.08109e-05	0.00136412
SLFN5	CD56bright NK	0.733976	8.75417	23.4284	1.19769e-05	0.00145937
MT-ND1	CD56bright NK	-0.603876	12.2858	23.3858	1.21589e-05	0.00145937
ISG15	CD56bright NK	1.87767	8.88619	23.2791	1.26357e-05	0.00148048
MT-ATP6	CD56bright NK	-0.601372	13.4039	21.7366	2.21179e-05	0.00236613
DDX60	CD56bright NK	1.3858	5.78619	21.6674	2.29067e-05	0.00239838
IFI16	CD56bright NK	0.618878	8.30621	21.3725	2.52971e-05	0.00254056
BST2	CD56bright NK	0.780752	8.51478	21.1334	2.76357e-05	0.00271991
ARHGEF2	CD56bright NK	-0.894137	5.28918	20.3518	3.75911e-05	0.00362717
DTX3L	CD56bright NK	1.00911	5.88935	20.1845	3.96865e-05	0.00375572
ZBP1	CD56bright NK	0.907199	6.31988	19.9024	4.39314e-05	0.00407899
SP110	CD56bright NK	0.833917	7.46251	19.1374	5.86234e-05	0.00515153
PHF11	CD56bright NK	0.797512	6.39281	19.0058	6.1788e-05	0.00533437
MT-ND5	CD56bright NK	-0.604305	11.1903	18.5491	7.34647e-05	0.00612745
STAT2	CD56bright NK	1.23756	5.71509	18.1003	8.81815e-05	0.00711379
ITPR1	CD56bright NK	0.786628	5.94774	17.5343	0.00010969	0.008485
MT-ND4	CD56bright NK	-0.529909	12.4996	17.505	0.000110352	0.008485
LAP3	CD56bright NK	1.07466	6.20874	17.3705	0.000116715	0.0088362
UBE2L6	CD56bright NK	0.83331	6.93845	17.0294	0.000133234	0.009934
APOL6	CD56bright NK	0.687766	6.5949	16.553	0.000161185	0.0112462
TRANK1	CD56bright NK	0.657002	6.41019	16.5041	0.000164545	0.0112462
GZMK	CD56bright NK	-0.723432	9.55812	16.2694	0.000180289	0.0121535
ZNF644	CD56bright NK	0.568046	6.64479	15.9348	0.000206496	0.0135489
STAT1	CD56bright NK	1.13264	7.18781	15.8136	0.000216811	0.0139571
AZI2	CD56bright NK	1.05014	5.42229	15.7979	0.000219859	0.0139571
DDX58	CD56bright NK	0.932001	5.58171	15.765	0.000222441	0.0139571
AC020916.1	CD56bright NK	-0.669551	7.77823	15.7135	0.000225752	0.0139571
N4BP1	CD56bright NK	0.738867	6.04876	15.4536	0.0002519	0.0152792
SHISA5	CD56bright NK	0.682133	6.39917	15.4206	0.000254601	0.0152792
IFIH1	CD56bright NK	1.18579	5.12115	15.1569	0.000285265	0.0168424
PPM1K	CD56bright NK	0.720879	6.29263	15.1259	0.000287495	0.0168424
LYRM4	CD56bright NK	-0.935641	5.19852	14.9914	0.000305892	0.0171056
CD81	CD56bright NK	-0.558738	8.2585	14.9211	0.000311868	0.0172438
BLCAP	CD56bright NK	-0.850788	5.33447	14.4579	0.000379712	0.0192635
HOPX	CD56bright NK	-0.639267	9.54133	14.3217	0.000399581	0.0200647
MRPS18B	CD56bright NK	0.657334	5.75415	14.2583	0.000412054	0.0203728
SMDT1	CD56bright NK	-0.544082	7.71635	14.232	0.000414838	0.0203728
ZFP14	CD56bright NK	-0.983442	5.02264	14.2339	0.000418137	0.0203728
PARP14	CD56bright NK	0.903313	7.30603	14.1645	0.0004268	0.020591
DDX60L	CD56bright NK	0.850422	5.87658	14.1178	0.00043653	0.020856
IRF9	CD56bright NK	0.827289	7.49726	14.0124	0.000454717	0.0213111
CHMP5	CD56bright NK	0.616176	6.54455	13.9885	0.00045963	0.0213381
CAPN2	CD56bright NK	0.813472	6.09226	13.8638	0.000485016	0.0223062
MT-ND3	CD56bright NK	-0.572652	12.7841	13.7398	0.000509646	0.0227997
P4HB	CD56bright NK	-0.508783	6.97937	13.5941	0.00054217	0.0238216
STX17	CD56bright NK	0.534224	6.31745	13.4028	0.000588602	0.025408
RAB11A	CD56bright NK	-0.551325	6.15094	13.3554	0.000600461	0.0256945
SMCHD1	CD56bright NK	0.505258	7.70915	13.0272	0.000689265	0.0285031
FBL	CD56bright NK	-0.50727	6.94679	13.004	0.000696343	0.0285559
PGP	CD56bright NK	-0.587425	5.98702	12.8507	0.00074473	0.0302877
SHFL	CD56bright NK	0.633474	6.67677	12.6901	0.000796745	0.0321375
HOOK3	CD56bright NK	0.516459	6.65383	12.603	0.00082703	0.0328211
DIDO1	CD56bright NK	-0.63757	5.97988	12.3373	0.000929357	0.0365869
ARHGAP12	CD56bright NK	-0.740295	5.46955	12.2058	0.000986129	0.0382106
TRIM14	CD56bright NK	0.806858	5.18924	12.0531	0.00105583	0.0405918
WAPL	CD56bright NK	0.561934	6.31384	11.8987	0.0011224	0.0422891
HELZ2	CD56bright NK	1.03685	5.01489	11.7466	0.00120473	0.0441971
HERC5	CD56bright NK	1.18862	5.63654	11.7392	0.00120733	0.0441971
TNFSF10	CD56bright NK	0.665178	7.18372	11.5205	0.00132342	0.046195
TAP1	CD56bright NK	0.618416	6.869	11.5205	0.00132361	0.046195
MPST	CD56bright NK	-0.541787	6.08148	11.3521	0.00142702	0.0480983
DDIT4	CD56bright NK	0.899021	8.00774	11.2355	0.0015004	0.0498885
TPT1	Naive CD8+ T	-0.628919	13.3185	59.3788	2.08494e-10	5.77111e-07
EEF1G	Naive CD8+ T	-0.805417	10.8964	57.4782	3.36098e-10	5.77111e-07
EEF1B2	Naive CD8+ T	-0.727604	11.1655	57.3653	3.45852e-10	5.77111e-07
RPS27A	Naive CD8+ T	-0.632856	12.7197	55.838	5.10842e-10	6.39318e-07
RPL4	Naive CD8+ T	-0.643564	10.5911	52.3741	1.26305e-09	1.26456e-06
[truncated: 1,675 more rows]

## Sheet: RSV_G1G2G3 vs Healthy
Gene	Cell Type	logFC	logCPM	F	PValue	p.adjusted
IFITM2	CD14+ Monocyte	2.55852	9.69281	64.8965	7.80222e-11	5.11201e-07
SHISA5	CD14+ Monocyte	1.07983	6.80576	56.2501	6.21376e-10	1.14474e-06
EPSTI1	CD14+ Monocyte	2.73035	7.82818	56.1825	6.31906e-10	1.14474e-06
SIGLEC1	CD14+ Monocyte	4.58785	6.64216	55.4865	7.57724e-10	1.14474e-06
IFI44L	CD14+ Monocyte	4.12571	8.98975	54.639	9.31652e-10	1.14474e-06
IFITM3	CD14+ Monocyte	3.94718	10.4567	54.1725	1.0483e-09	1.14474e-06
EEF1B2	CD14+ Monocyte	-1.38188	8.83412	51.9503	1.85629e-09	1.69207e-06
SP110	CD14+ Monocyte	1.38728	7.76858	51.3158	2.19051e-09	1.69207e-06
EIF3L	CD14+ Monocyte	-1.43825	7.17956	50.987	2.38771e-09	1.69207e-06
KLHDC7B	CD14+ Monocyte	3.41315	4.77018	50.6814	2.58252e-09	1.69207e-06
XAF1	CD14+ Monocyte	2.25388	8.62649	50.1214	2.99915e-09	1.7864e-06
RPS23	CD14+ Monocyte	-0.897169	11.0363	49.6811	3.37032e-09	1.84019e-06
EEF1G	CD14+ Monocyte	-1.02656	9.33863	49.1199	3.91417e-09	1.97274e-06
HIST1H1E	CD14+ Monocyte	1.67953	6.01075	48.4341	4.73313e-09	2.2151e-06
EIF4B	CD14+ Monocyte	-1.43943	7.42469	47.8514	5.50679e-09	2.40537e-06
EEF1A1	CD14+ Monocyte	-1.00284	12.3184	47.2883	6.41577e-09	2.61113e-06
EIF2AK2	CD14+ Monocyte	1.88203	7.58245	47.062	6.82609e-09	2.61113e-06
RPS16	CD14+ Monocyte	-0.784083	10.5778	46.8792	7.17344e-09	2.61113e-06
EEF2	CD14+ Monocyte	-1.05584	8.96927	46.5317	7.89002e-09	2.63231e-06
SNHG29	CD14+ Monocyte	-1.2172	8.06067	46.3463	8.30259e-09	2.63231e-06
RPL4	CD14+ Monocyte	-1.08301	9.4188	46.125	8.8236e-09	2.63231e-06
IFI44	CD14+ Monocyte	2.85117	7.52897	46.1224	8.83863e-09	2.63231e-06
OTOF	CD14+ Monocyte	6.9947	4.93259	42.7349	1.12623e-08	3.2083e-06
HSH2D	CD14+ Monocyte	1.51559	5.67546	44.7887	1.28109e-08	3.2808e-06
LY6E	CD14+ Monocyte	2.61656	9.32551	44.6493	1.32944e-08	3.2808e-06
RPS8	CD14+ Monocyte	-0.888494	11.1132	44.6357	1.33443e-08	3.2808e-06
OASL	CD14+ Monocyte	3.30769	6.13801	44.6064	1.35198e-08	3.2808e-06
DDX60	CD14+ Monocyte	2.13837	5.92331	44.0661	1.57156e-08	3.67745e-06
RPLP0	CD14+ Monocyte	-1.30952	9.4129	42.2237	2.64447e-08	5.97468e-06
KIF22	CD14+ Monocyte	-1.29788	4.40648	41.8423	2.96686e-08	6.17954e-06
IFI6	CD14+ Monocyte	3.46504	9.27018	41.6243	3.14337e-08	6.17954e-06
RPL8	CD14+ Monocyte	-0.680737	10.5633	41.5381	3.22242e-08	6.17954e-06
CCT6A	CD14+ Monocyte	-0.538179	6.55053	41.5372	3.22421e-08	6.17954e-06
QARS	CD14+ Monocyte	-0.903846	5.63075	41.3528	3.40297e-08	6.17954e-06
LY96	CD14+ Monocyte	0.902083	7.20636	41.3484	3.40505e-08	6.17954e-06
IRF7	CD14+ Monocyte	2.16566	7.46613	41.2871	3.4664e-08	6.17954e-06
AC009950.1	CD14+ Monocyte	1.55882	4.94569	41.2793	3.48966e-08	6.17954e-06
KIAA1958	CD14+ Monocyte	1.71705	4.77055	40.8168	4.00882e-08	6.91205e-06
CMPK2	CD14+ Monocyte	2.88491	6.38935	40.6572	4.18012e-08	7.02261e-06
IFI27	CD14+ Monocyte	8.29844	9.59347	39.3403	5.07978e-08	8.28489e-06
IFITM1	CD14+ Monocyte	6.02717	7.66258	39.3694	5.27632e-08	8.28489e-06
RPL22	CD14+ Monocyte	-0.726407	10.0799	39.828	5.31083e-08	8.28489e-06
VPS51	CD14+ Monocyte	-0.734825	5.46463	39.5467	5.77596e-08	8.80095e-06
SP100	CD14+ Monocyte	0.81643	7.83158	39.2887	6.23009e-08	9.27717e-06
USP18	CD14+ Monocyte	4.72431	4.84465	38.8179	6.49278e-08	9.45349e-06
HSPA6	CD14+ Monocyte	1.60952	5.31438	38.8827	7.05636e-08	1.00507e-05
SAMD9L	CD14+ Monocyte	2.19582	7.61011	38.3807	8.16976e-08	1.09597e-05
RPS6	CD14+ Monocyte	-0.991036	10.6554	38.3445	8.25628e-08	1.09597e-05
RPS4X	CD14+ Monocyte	-0.970495	10.5305	38.3014	8.36363e-08	1.09597e-05
HESX1	CD14+ Monocyte	4.77626	2.97852	35.6718	9.50256e-08	1.2208e-05
KRT10	CD14+ Monocyte	-1.15037	5.99557	37.6919	1.00528e-07	1.2447e-05
OAS1	CD14+ Monocyte	1.84666	7.52605	37.6859	1.00686e-07	1.2447e-05
CTSL	CD14+ Monocyte	2.00244	5.12991	37.5636	1.04877e-07	1.27251e-05
EPHB2	CD14+ Monocyte	1.89536	3.97083	37.4212	1.09424e-07	1.28072e-05
PARP9	CD14+ Monocyte	1.82321	7.17908	37.4103	1.09463e-07	1.28072e-05
RTP4	CD14+ Monocyte	2.1433	3.79397	37.1957	1.15589e-07	1.32867e-05
RPL3	CD14+ Monocyte	-1.14929	10.2955	36.8772	1.28683e-07	1.45367e-05
MAZ	CD14+ Monocyte	-0.613783	6.08289	36.717	1.35181e-07	1.49209e-05
RPL15	CD14+ Monocyte	-0.813428	10.8383	36.6575	1.37611e-07	1.49209e-05
PHF11	CD14+ Monocyte	0.984737	6.466	36.6262	1.38994e-07	1.49209e-05
RPL21	CD14+ Monocyte	-0.745091	11.0116	36.5445	1.42454e-07	1.49209e-05
SAMD9	CD14+ Monocyte	1.79852	7.33139	36.4819	1.45275e-07	1.49209e-05
IPO5	CD14+ Monocyte	-1.04374	4.59563	36.4825	1.45747e-07	1.49209e-05
MPST	CD14+ Monocyte	-0.743768	5.14977	36.2019	1.58416e-07	1.59683e-05
IFI35	CD14+ Monocyte	1.90928	6.99989	36.0681	1.64938e-07	1.63739e-05
RPLP1	CD14+ Monocyte	-0.748185	12.1801	35.8597	1.75834e-07	1.70601e-05
RPS21	CD14+ Monocyte	-0.540224	10.1805	35.8372	1.77058e-07	1.70601e-05
TPT1	CD14+ Monocyte	-0.856133	12.1083	35.2483	2.12501e-07	1.98883e-05
RPL10	CD14+ Monocyte	-0.870584	11.8124	35.2343	2.13427e-07	1.98883e-05
RPS2	CD14+ Monocyte	-0.851996	11.478	35.0326	2.2726e-07	1.98883e-05
MX1	CD14+ Monocyte	2.5901	8.59065	35.0265	2.2772e-07	1.98883e-05
MX2	CD14+ Monocyte	1.93446	8.14493	35.0244	2.27861e-07	1.98883e-05
EIF3H	CD14+ Monocyte	-0.547547	7.99218	35.0166	2.28402e-07	1.98883e-05
HIST2H2BE	CD14+ Monocyte	1.80491	3.79216	34.9663	2.30695e-07	1.98883e-05
OAS2	CD14+ Monocyte	2.1079	7.29331	34.8445	2.41085e-07	2.05142e-05
IFI16	CD14+ Monocyte	1.10511	8.5932	34.7999	2.44388e-07	2.05286e-05
BLVRA	CD14+ Monocyte	1.09333	7.38701	34.5705	2.62598e-07	2.1779e-05
ST8SIA4	CD14+ Monocyte	0.659316	6.39	34.4973	2.68778e-07	2.18158e-05
RPS5	CD14+ Monocyte	-0.834841	9.23519	34.4744	2.70606e-07	2.18158e-05
MYD88	CD14+ Monocyte	0.646526	7.15145	34.4464	2.7303e-07	2.18158e-05
IFIT3	CD14+ Monocyte	3.71026	7.52518	34.3401	2.82536e-07	2.22057e-05
RPL13	CD14+ Monocyte	-0.749268	11.8298	34.269	2.88648e-07	2.22057e-05
SMCHD1	CD14+ Monocyte	0.8773	8.53635	34.2124	2.93842e-07	2.22057e-05
RPL6	CD14+ Monocyte	-0.878659	10.6859	34.2023	2.94769e-07	2.22057e-05
CIR1	CD14+ Monocyte	0.681679	6.86874	34.1792	2.9697e-07	2.22057e-05
NDUFAF8	CD14+ Monocyte	-0.805524	5.16488	34.1689	2.98245e-07	2.22057e-05
CHMP5	CD14+ Monocyte	1.27193	6.986	33.9599	3.18259e-07	2.32175e-05
PCBP2	CD14+ Monocyte	-0.594416	8.42219	33.9265	3.21558e-07	2.32175e-05
LEPROTL1	CD14+ Monocyte	0.769542	6.78864	33.9181	3.22465e-07	2.32175e-05
FCGR3A	CD14+ Monocyte	2.12992	6.60029	33.7035	3.45401e-07	2.45986e-05
HMGA1	CD14+ Monocyte	-0.745424	5.5441	33.6656	3.49488e-07	2.4622e-05
RPS3A	CD14+ Monocyte	-1.11346	10.9704	33.5172	3.66048e-07	2.55143e-05
RPS24	CD14+ Monocyte	-0.640848	11.6367	33.4413	3.74982e-07	2.58619e-05
RPL23A	CD14+ Monocyte	-0.636028	10.5003	33.3194	3.89806e-07	2.66042e-05
LMO2	CD14+ Monocyte	0.675992	7.61838	33.2412	3.99657e-07	2.69954e-05
TRIM22	CD14+ Monocyte	1.59291	7.71252	33.1999	4.04982e-07	2.70759e-05
RPL18	CD14+ Monocyte	-0.606418	10.738	32.9464	4.39041e-07	2.81957e-05
RPS11	CD14+ Monocyte	-0.628504	10.7276	32.9242	4.42172e-07	2.81957e-05
FCGR1A	CD14+ Monocyte	1.9118	6.88873	32.9017	4.45464e-07	2.81957e-05
SRA1	CD14+ Monocyte	0.634437	6.37663	32.8955	4.46359e-07	2.81957e-05
SCO2	CD14+ Monocyte	1.39623	7.95137	32.8427	4.53879e-07	2.81957e-05
OSTC	CD14+ Monocyte	-0.570926	6.49718	32.833	4.55335e-07	2.81957e-05
OAS3	CD14+ Monocyte	2.40832	6.74358	32.7728	4.64421e-07	2.84382e-05
SNRNP200	CD14+ Monocyte	-0.515449	5.69312	32.4996	5.06981e-07	3.07569e-05
RAE1	CD14+ Monocyte	-0.840195	4.56461	32.4592	5.14903e-07	3.08028e-05
IMPDH2	CD14+ Monocyte	-1.25011	4.33221	32.4468	5.17141e-07	3.08028e-05
GMPR	CD14+ Monocyte	3.37922	4.15841	32.2793	5.30865e-07	3.10556e-05
RNF213	CD14+ Monocyte	1.14057	8.90772	32.2746	5.44713e-07	3.15837e-05
RPL5	CD14+ Monocyte	-1.16181	9.97398	32.2312	5.5238e-07	3.17473e-05
RPS14	CD14+ Monocyte	-0.719978	11.3639	32.1333	5.70107e-07	3.24812e-05
STAC3	CD14+ Monocyte	1.05155	5.73451	32.0767	5.81064e-07	3.28201e-05
DHX58	CD14+ Monocyte	1.94935	4.55578	32.0132	5.97179e-07	3.3442e-05
RPS27A	CD14+ Monocyte	-0.734308	10.9544	31.8505	6.24709e-07	3.46873e-05
CNP	CD14+ Monocyte	1.07581	4.92331	31.8278	6.3103e-07	3.47438e-05
IFIT1	CD14+ Monocyte	3.86969	7.22877	31.6954	6.58701e-07	3.57619e-05
FBL	CD14+ Monocyte	-0.89021	5.77976	31.6806	6.60437e-07	3.57619e-05
RPL13A	CD14+ Monocyte	-0.753974	10.9418	31.6341	6.7015e-07	3.58486e-05
EIF3D	CD14+ Monocyte	-0.50943	6.98069	31.6214	6.72982e-07	3.58486e-05
ZCCHC2	CD14+ Monocyte	1.33505	6.04604	31.2314	7.64828e-07	4.01368e-05
ATP6V0E1	CD14+ Monocyte	0.532987	8.62647	31.2248	7.65735e-07	4.01368e-05
PLSCR1	CD14+ Monocyte	1.33269	8.00232	30.9805	8.29476e-07	4.3041e-05
RPL7	CD14+ Monocyte	-0.896772	10.2696	30.9627	8.34281e-07	4.3041e-05
TCN2	CD14+ Monocyte	2.27248	5.08079	30.905	8.54407e-07	4.3735e-05
ADAR	CD14+ Monocyte	0.994096	7.75607	30.8469	8.66607e-07	4.40155e-05
RPL9	CD14+ Monocyte	-0.779205	10.7972	30.8028	8.79187e-07	4.42504e-05
CLU	CD14+ Monocyte	5.99234	6.00143	29.963	8.93097e-07	4.42504e-05
TNFSF13B	CD14+ Monocyte	0.896429	8.80904	30.7402	8.97462e-07	4.42504e-05
ZBP1	CD14+ Monocyte	2.88176	4.82285	30.7419	9.0212e-07	4.42504e-05
MS4A4A	CD14+ Monocyte	2.62308	5.39339	30.7284	9.06404e-07	4.42504e-05
SPN	CD14+ Monocyte	-0.928888	6.46889	30.6766	9.16659e-07	4.42504e-05
MYL12A	CD14+ Monocyte	0.656722	9.35578	30.6697	9.18507e-07	4.42504e-05
TRIM69	CD14+ Monocyte	1.41769	5.05571	30.4421	9.92382e-07	4.74605e-05
RPL27A	CD14+ Monocyte	-0.584705	10.4111	30.316	1.03205e-06	4.87467e-05
RPL39	CD14+ Monocyte	-0.513355	11.582	30.3099	1.03416e-06	4.87467e-05
PLAC8	CD14+ Monocyte	2.60196	8.598	30.2358	1.05986e-06	4.93608e-05
NOP53	CD14+ Monocyte	-0.682645	7.66485	30.0451	1.12891e-06	5.2089e-05
IFIT5	CD14+ Monocyte	1.97975	4.78504	29.9843	1.14278e-06	5.22634e-05
MNDA	CD14+ Monocyte	0.59751	10.987	29.9927	1.14865e-06	5.22634e-05
APOBEC3A	CD14+ Monocyte	2.35115	8.7072	29.9235	1.17537e-06	5.26488e-05
PARP14	CD14+ Monocyte	1.66077	8.43292	29.9207	1.17647e-06	5.26488e-05
ISG15	CD14+ Monocyte	3.17894	9.48737	29.9018	1.18386e-06	5.26488e-05
SERPING1	CD14+ Monocyte	4.10408	5.42957	29.891	1.18926e-06	5.26488e-05
RPS3	CD14+ Monocyte	-0.657401	10.6295	29.5173	1.34547e-06	5.87701e-05
S100A11	CD14+ Monocyte	0.517139	11.1319	29.4031	1.39781e-06	6.06521e-05
RPS13	CD14+ Monocyte	-0.619	11.1507	29.3648	1.41581e-06	6.10287e-05
RSAD2	CD14+ Monocyte	3.81796	6.99733	29.1723	1.51555e-06	6.44799e-05
PML	CD14+ Monocyte	1.55015	5.49325	29.0186	1.59273e-06	6.72254e-05
ATP10A	CD14+ Monocyte	1.56574	3.82427	28.9261	1.63771e-06	6.80558e-05
RPL10A	CD14+ Monocyte	-0.884302	9.95316	28.9244	1.64115e-06	6.80558e-05
RPL7A	CD14+ Monocyte	-0.732014	10.6139	28.8293	1.69453e-06	6.98273e-05
TNFSF10	CD14+ Monocyte	1.6038	8.92248	28.5059	1.88998e-06	7.69138e-05
ITGAE	CD14+ Monocyte	-0.892495	5.24492	28.4687	1.91563e-06	7.74767e-05
RPL26	CD14+ Monocyte	-0.62883	11.5244	28.1325	2.14496e-06	8.56939e-05
RPS7	CD14+ Monocyte	-0.639854	10.6266	28.0602	2.19835e-06	8.72944e-05
IFIH1	CD14+ Monocyte	1.80731	6.46519	27.9795	2.26107e-06	8.92441e-05
FFAR2	CD14+ Monocyte	2.16243	5.82468	27.7854	2.41715e-06	9.48332e-05
HELZ2	CD14+ Monocyte	1.60721	5.65098	27.67	2.514e-06	9.80459e-05
IFI30	CD14+ Monocyte	0.706877	10.553	27.642	2.5354e-06	9.82956e-05
ALAS1	CD14+ Monocyte	0.971745	4.38065	27.4707	2.70257e-06	0.00010416
RPL34	CD14+ Monocyte	-0.584417	11.4101	27.3895	2.76448e-06	0.000105923
PSMA6	CD14+ Monocyte	0.593305	7.56676	27.3215	2.82997e-06	0.000107802
DDB1	CD14+ Monocyte	-0.572129	5.40486	27.3006	2.85223e-06	0.000108022
PARP12	CD14+ Monocyte	1.3723	5.78973	27.088	3.06953e-06	0.000112986
LMNB1	CD14+ Monocyte	1.31153	6.01602	27.0002	3.1633e-06	0.000115144
HERC5	CD14+ Monocyte	2.81967	6.42821	26.8634	3.31885e-06	0.000118888
SCARB2	CD14+ Monocyte	0.70349	6.52328	26.858	3.32059e-06	0.000118888
RPSA	CD14+ Monocyte	-0.689588	9.32993	26.7272	3.47354e-06	0.000123688
ATP5F1A	CD14+ Monocyte	-0.546657	7.4436	26.6121	3.61508e-06	0.000126756
C2	CD14+ Monocyte	2.35168	4.06663	26.6138	3.63381e-06	0.000126756
UTRN	CD14+ Monocyte	0.543191	7.76623	26.5946	3.63709e-06	0.000126756
CD2AP	CD14+ Monocyte	1.25003	5.11578	26.5235	3.73522e-06	0.000129488
RPS15A	CD14+ Monocyte	-0.552009	11.0011	26.4753	3.79066e-06	0.000130718
APOBEC3G	CD14+ Monocyte	1.02999	5.53039	26.359	3.94971e-06	0.00013549
RPL17	CD14+ Monocyte	-0.676	10.9381	26.2037	4.16651e-06	0.00014102
PHB2	CD14+ Monocyte	-0.526155	6.5136	26.1979	4.17549e-06	0.00014102
LAIR1	CD14+ Monocyte	0.788675	6.21315	26.1185	4.29337e-06	0.00014421
LGALS3BP	CD14+ Monocyte	3.1013	5.41409	26.1173	4.31396e-06	0.00014421
CIAO2A	CD14+ Monocyte	0.500192	6.10161	25.9566	4.54357e-06	0.000150297
NEXN	CD14+ Monocyte	2.53885	5.10697	25.958	4.56489e-06	0.000150297
CRTAP	CD14+ Monocyte	-0.650999	6.85529	25.9088	4.61925e-06	0.000151326
SLC25A5	CD14+ Monocyte	-0.736852	7.95463	25.8802	4.66542e-06	0.000152079
RPS17	CD14+ Monocyte	-0.678047	9.41203	25.7992	4.79969e-06	0.000155681
RPL32	CD14+ Monocyte	-0.520666	11.4422	25.7662	4.85546e-06	0.000155946
TYMP	CD14+ Monocyte	1.05891	10.5977	25.6768	5.0103e-06	0.000159907
DANCR	CD14+ Monocyte	-1.57908	3.35112	25.6903	5.0276e-06	0.000159907
DYNLT1	CD14+ Monocyte	0.690186	7.37573	25.6209	5.10991e-06	0.00016174
UBE2L6	CD14+ Monocyte	1.447	7.32285	25.5616	5.21783e-06	0.000163666
CD300A	CD14+ Monocyte	0.728794	6.63024	25.5601	5.22073e-06	0.000163666
TRIM34	CD14+ Monocyte	0.871367	4.97924	25.5372	5.2779e-06	0.00016389
B2M	CD14+ Monocyte	0.688167	13.3122	25.4738	5.38114e-06	0.000165773
BLOC1S1	CD14+ Monocyte	0.61348	8.19718	25.4697	5.38914e-06	0.000165773
EIF2D	CD14+ Monocyte	-0.74891	3.74692	25.4451	5.46392e-06	0.000167288
RAB8A	CD14+ Monocyte	0.565314	7.1089	25.1749	5.98034e-06	0.000180568
MAIP1	CD14+ Monocyte	0.840536	3.92586	25.1701	6.02546e-06	0.00018069
MRPS18C	CD14+ Monocyte	0.777628	6.28729	25.1477	6.03953e-06	0.00018069
IGFLR1	CD14+ Monocyte	0.770184	6.30825	24.9221	6.54153e-06	0.000192603
ATP13A1	CD14+ Monocyte	0.759385	5.21578	24.9193	6.55531e-06	0.000192603
CD63	CD14+ Monocyte	0.844043	8.7814	24.8151	6.79384e-06	0.00019872
STAT1	CD14+ Monocyte	1.62386	8.02251	24.7924	6.84897e-06	0.000199016
FCGR1B	CD14+ Monocyte	1.76257	5.66545	24.7879	6.86471e-06	0.000199016
GIMAP2	CD14+ Monocyte	0.805836	6.08877	24.6691	7.15924e-06	0.000205971
SORL1	CD14+ Monocyte	-0.890108	7.30589	24.6502	7.20491e-06	0.000205971
PSMA3	CD14+ Monocyte	0.532241	6.47553	24.6422	7.22607e-06	0.000205971
B3GALT4	CD14+ Monocyte	0.789547	4.25498	24.651	7.23035e-06	0.000205971
MLEC	CD14+ Monocyte	-0.747516	5.64946	24.5072	7.58466e-06	0.000214201
SLC9A3R1	CD14+ Monocyte	-0.730904	5.78668	24.4804	7.65718e-06	0.000215321
RPL18A	CD14+ Monocyte	-0.530877	11.0774	24.4165	7.8311e-06	0.000218338
SP140	CD14+ Monocyte	1.64237	4.12055	24.3407	8.09005e-06	0.000224602
ST13	CD14+ Monocyte	-0.575188	6.64332	24.3112	8.1326e-06	0.00022483
DDX60L	CD14+ Monocyte	1.2047	7.06902	24.201	8.46061e-06	0.000231941
GIMAP1	CD14+ Monocyte	0.764133	6.91288	24.0491	8.93417e-06	0.000243903
RPLP2	CD14+ Monocyte	-0.509201	10.8769	24.0048	9.07656e-06	0.000246473
GIMAP4	CD14+ Monocyte	0.987692	8.39753	23.9852	9.14118e-06	0.000246473
RPS18	CD14+ Monocyte	-0.66205	11.4259	23.902	9.41879e-06	0.000251975
NCOA7	CD14+ Monocyte	1.4266	5.79905	23.7296	1.00331e-05	0.000264253
PDIA4	CD14+ Monocyte	-0.55005	5.28372	23.6801	1.02104e-05	0.000267595
RACK1	CD14+ Monocyte	-0.618838	10.275	23.6286	1.03953e-05	0.000270648
SHFL	CD14+ Monocyte	0.999913	5.70439	23.6002	1.05087e-05	0.000272145
LGALS9	CD14+ Monocyte	0.846741	7.74448	23.5827	1.05696e-05	0.000272645
STAT2	CD14+ Monocyte	1.09681	7.331	23.366	1.14333e-05	0.00029322
MT-ND1	CD14+ Monocyte	-0.644775	12.3843	23.3601	1.14567e-05	0.00029322
TMEM123	CD14+ Monocyte	0.961959	8.51995	23.3325	1.15727e-05	0.000295036
SELENOW	CD14+ Monocyte	0.501363	6.38032	23.2643	1.18644e-05	0.000301302
TTC3	CD14+ Monocyte	-0.783992	6.41167	23.2471	1.19388e-05	0.000302019
IFIT2	CD14+ Monocyte	2.9505	7.36988	23.1929	1.21783e-05	0.000306892
DRAP1	CD14+ Monocyte	0.755435	7.75084	23.1703	1.22753e-05	0.000308153
EI24	CD14+ Monocyte	-0.532349	4.77793	23.0037	1.30619e-05	0.000323686
GRN	CD14+ Monocyte	0.573867	9.69583	22.9033	1.35301e-05	0.000332019
PABPC1	CD14+ Monocyte	-0.713566	10.2794	22.8321	1.38866e-05	0.000337416
TMEM35B	CD14+ Monocyte	0.651164	4.96628	22.8314	1.39045e-05	0.000337416
MT1F	CD14+ Monocyte	1.51454	3.90272	22.807	1.40854e-05	0.000340093
DDX58	CD14+ Monocyte	1.65545	6.33676	22.7889	1.41186e-05	0.000340093
RBX1	CD14+ Monocyte	0.553844	7.74915	22.7493	1.43145e-05	0.000342294
NAGK	CD14+ Monocyte	0.707244	7.83303	22.6597	1.47917e-05	0.00035242
NIT2	CD14+ Monocyte	-0.800477	3.81514	22.6027	1.51674e-05	0.00035876
AP5B1	CD14+ Monocyte	0.595368	6.62761	22.4782	1.58126e-05	0.000370015
MED7	CD14+ Monocyte	0.676292	3.86363	22.3717	1.65152e-05	0.000383303
RPS12	CD14+ Monocyte	-0.514036	11.5759	22.3391	1.66407e-05	0.000383303
NME2	CD14+ Monocyte	-0.50324	8.52691	22.3378	1.66491e-05	0.000383303
PABPC4	CD14+ Monocyte	-0.803231	6.37456	22.3346	1.66708e-05	0.000383303
CALU	CD14+ Monocyte	-0.514055	5.17328	22.3361	1.6673e-05	0.000383303
SECTM1	CD14+ Monocyte	0.879609	6.83215	22.311	1.68158e-05	0.000384695
MRPS33	CD14+ Monocyte	-0.548792	4.93797	22.2532	1.71929e-05	0.000391138
DTX3L	CD14+ Monocyte	1.14956	6.49511	22.2197	1.73964e-05	0.000394398
PRRG4	CD14+ Monocyte	0.57479	4.96335	22.1779	1.76821e-05	0.000399494
RPL36A	CD14+ Monocyte	-0.564734	10.1794	22.1083	1.81203e-05	0.000407988
CMTR1	CD14+ Monocyte	1.00595	4.18352	22.0575	1.85487e-05	0.000414783
CCR1	CD14+ Monocyte	1.04534	7.55607	22.011	1.87849e-05	0.000418635
H2AFJ	CD14+ Monocyte	0.847883	7.04078	21.9039	1.9546e-05	0.000432653
GPANK1	CD14+ Monocyte	0.662826	4.53429	21.8793	1.97821e-05	0.000434941
IRF9	CD14+ Monocyte	0.815171	6.60394	21.77	2.05421e-05	0.000445669
SPATS2L	CD14+ Monocyte	2.06195	4.98273	21.7252	2.09587e-05	0.000453182
TPCN1	CD14+ Monocyte	-0.781476	4.95686	21.7091	2.10267e-05	0.000453182
SERPINA1	CD14+ Monocyte	0.785076	9.47373	21.6115	2.17871e-05	0.000466541
RAB4A	CD14+ Monocyte	-0.648506	5.3708	21.6102	2.1808e-05	0.000466541
BTF3	CD14+ Monocyte	-0.505836	9.15036	21.6025	2.18602e-05	0.000466541
XRN1	CD14+ Monocyte	0.825147	6.69898	21.5214	2.25338e-05	0.000477804
TOR1B	CD14+ Monocyte	1.31797	4.89032	21.2194	2.52739e-05	0.000530753
LSM4	CD14+ Monocyte	-0.568576	6.16443	21.1185	2.61975e-05	0.000548391
C1QBP	CD14+ Monocyte	-0.533297	6.15037	21.1052	2.63292e-05	0.000549392
LILRB2	CD14+ Monocyte	0.632728	8.17403	21.0252	2.7128e-05	0.000564263
PSMC2	CD14+ Monocyte	0.586232	5.36043	20.8761	2.87152e-05	0.000593508
RNASEL	CD14+ Monocyte	0.810879	4.05092	20.827	2.93249e-05	0.000604204
RPS10	CD14+ Monocyte	-0.691869	8.76973	20.7999	2.9528e-05	0.000606345
PPM1K	CD14+ Monocyte	1.24864	5.21936	20.7972	2.96139e-05	0.000606345
TRIM5	CD14+ Monocyte	1.03597	4.90798	20.778	2.98321e-05	0.000608908
HSPD1	CD14+ Monocyte	-0.608699	6.46394	20.6227	3.15734e-05	0.00064046
HLA-B	CD14+ Monocyte	0.546145	11.6871	20.5927	3.19302e-05	0.000644785
GIMAP5	CD14+ Monocyte	1.45975	4.67485	20.5964	3.19834e-05	0.000644785
RPL27	CD14+ Monocyte	-0.524216	10.0268	20.5681	3.22287e-05	0.000647737
EIF3F	CD14+ Monocyte	-0.628346	7.78372	20.4362	3.3879e-05	0.000678824
NMI	CD14+ Monocyte	0.932882	6.95857	20.4264	3.40075e-05	0.000679321
CUL1	CD14+ Monocyte	1.15956	6.31024	20.4015	3.4335e-05	0.000683778
H1FX	CD14+ Monocyte	0.685702	7.97991	20.3811	3.45949e-05	0.000684792
TIMP1	CD14+ Monocyte	0.617015	8.41242	20.3279	3.52992e-05	0.000696627
CPNE2	CD14+ Monocyte	-0.64191	4.13289	20.2552	3.63782e-05	0.00071458
PSMB9	CD14+ Monocyte	1.17252	8.16531	20.2451	3.6427e-05	0.00071458
MAT2A	CD14+ Monocyte	-0.627037	6.16593	20.1844	3.72837e-05	0.000727032
CNIH4	CD14+ Monocyte	0.997424	6.30639	20.128	3.80931e-05	0.00073842
ZC3HAV1	CD14+ Monocyte	0.593124	6.71578	20.1069	3.83986e-05	0.000742146
VRK2	CD14+ Monocyte	0.864256	4.91094	20.0731	3.89384e-05	0.000746013
HERC6	CD14+ Monocyte	1.70122	4.17564	20.0595	3.90541e-05	0.000746013
PRKDC	CD14+ Monocyte	-0.619961	6.02511	20.0119	3.98185e-05	0.000752186
C1GALT1C1	CD14+ Monocyte	0.663336	4.3694	20.0161	3.98365e-05	0.000752186
FAM8A1	CD14+ Monocyte	0.810436	4.68262	19.9554	4.07736e-05	0.000763282
MPRIP	CD14+ Monocyte	-0.737592	4.6729	19.8987	4.16235e-05	0.000773922
EVI2A	CD14+ Monocyte	0.51382	7.97795	19.8907	4.16963e-05	0.000773922
PRKAR2A	CD14+ Monocyte	-0.527315	6.03764	19.8532	4.23047e-05	0.000778597
SNRNP35	CD14+ Monocyte	0.513334	4.648	19.8379	4.26215e-05	0.00078223
ISG20	CD14+ Monocyte	2.38538	6.03219	19.79	4.33613e-05	0.000791374
NAPA	CD14+ Monocyte	0.816924	6.56614	19.7169	4.45682e-05	0.000808894
NPL	CD14+ Monocyte	0.628706	5.95601	19.6905	4.50271e-05	0.000814966
FBXO6	CD14+ Monocyte	1.13144	5.04296	19.5729	4.71348e-05	0.000846102
TRAFD1	CD14+ Monocyte	0.760911	5.13616	19.5364	4.7812e-05	0.000855912
COA1	CD14+ Monocyte	0.516139	5.29504	19.5074	4.83215e-05	0.00085875
CALML4	CD14+ Monocyte	0.635049	5.25881	19.5048	4.83764e-05	0.00085875
ACP2	CD14+ Monocyte	1.00902	3.96029	19.5012	4.85847e-05	0.00085875
FAM168B	CD14+ Monocyte	-0.655214	4.34463	19.4942	4.86258e-05	0.00085875
TDRD7	CD14+ Monocyte	0.890746	4.53882	19.474	4.90652e-05	0.00086418
IRF2	CD14+ Monocyte	0.527515	6.50728	19.4556	4.92725e-05	0.000865505
PLEK	CD14+ Monocyte	0.673705	8.69063	19.4203	4.99405e-05	0.000874893
LRPPRC	CD14+ Monocyte	-0.611555	5.38845	19.3878	5.05931e-05	0.000881611
BST2	CD14+ Monocyte	0.885597	8.37328	19.345	5.14104e-05	0.000888762
SND1	CD14+ Monocyte	-0.578257	5.80851	19.3317	5.16843e-05	0.000891146
LENG1	CD14+ Monocyte	0.57117	4.42734	19.32	5.20175e-05	0.000893277
UNC93B1	CD14+ Monocyte	0.502265	7.15457	19.3115	5.20806e-05	0.000893277
FCGR2A	CD14+ Monocyte	0.627305	7.90754	19.2756	5.28043e-05	0.000900973
EIF3E	CD14+ Monocyte	-0.607145	8.44839	19.2227	5.3893e-05	0.000908372
MT-ND4	CD14+ Monocyte	-0.68374	12.3462	19.2218	5.39126e-05	0.000908372
FOXJ2	CD14+ Monocyte	-0.541569	4.22781	19.2198	5.41095e-05	0.000908372
TRIM14	CD14+ Monocyte	1.03285	5.66502	19.2055	5.42856e-05	0.000908372
SSB	CD14+ Monocyte	0.68556	7.39123	19.2011	5.4347e-05	0.000908372
CARD6	CD14+ Monocyte	0.645362	4.9176	19.1134	5.63475e-05	0.000932296
PSMB8	CD14+ Monocyte	0.580931	7.91635	19.0093	5.85315e-05	0.000956354
AIM2	CD14+ Monocyte	2.07134	4.00081	19.0116	5.87392e-05	0.000957361
BCL2A1	CD14+ Monocyte	1.30125	7.4904	18.988	5.90181e-05	0.00095952
MT-ND5	CD14+ Monocyte	-0.601218	10.6527	18.9629	5.95927e-05	0.000966463
GNG2	CD14+ Monocyte	-0.964758	5.52532	18.9365	6.02277e-05	0.000971951
HLA-C	CD14+ Monocyte	0.634207	11.0731	18.9248	6.04811e-05	0.000973641
STX17	CD14+ Monocyte	0.647663	4.93261	18.917	6.07464e-05	0.000974929
CXorf21	CD14+ Monocyte	0.563015	5.58217	18.8329	6.26964e-05	0.000999481
HIST1H1C	CD14+ Monocyte	1.63566	5.53402	18.8122	6.32858e-05	0.00100399
ARHGAP25	CD14+ Monocyte	0.608316	5.51131	18.7751	6.41442e-05	0.00101515
MT-CO1	CD14+ Monocyte	-0.62369	13.5761	18.7271	6.53107e-05	0.00102864
MTF1	CD14+ Monocyte	0.610451	5.73351	18.7124	6.57069e-05	0.0010324
RBM14	CD14+ Monocyte	-0.520518	5.22758	18.6962	6.61417e-05	0.00103675
SH2B2	CD14+ Monocyte	1.10232	4.4271	18.67	6.69443e-05	0.00104682
PLBD1	CD14+ Monocyte	1.04466	8.58417	18.599	6.86543e-05	0.00106846
FAM20A	CD14+ Monocyte	3.9039	3.88486	18.2536	7.03574e-05	0.00108979
STXBP2	CD14+ Monocyte	0.75588	8.93314	18.4644	7.23581e-05	0.00110081
FAS	CD14+ Monocyte	0.90461	4.78494	18.4663	7.24189e-05	0.00110081
MT2A	CD14+ Monocyte	2.07587	8.40478	18.4566	7.25809e-05	0.00110081
GFM1	CD14+ Monocyte	-0.501144	4.77326	18.4301	7.34326e-05	0.00111099
APRT	CD14+ Monocyte	-0.520776	7.63327	18.4153	7.3762e-05	0.00111101
ACOT13	CD14+ Monocyte	0.698696	3.98431	18.4139	7.40333e-05	0.00111254
HGSNAT	CD14+ Monocyte	-0.546034	5.26439	18.3527	7.56258e-05	0.00113387
IGFBP7	CD14+ Monocyte	0.600372	5.41803	18.3232	7.65051e-05	0.00114443
CLEC2B	CD14+ Monocyte	0.600319	6.79633	18.1078	8.32169e-05	0.00123637
SLC25A6	CD14+ Monocyte	-0.621281	9.18606	18.0784	8.41813e-05	0.00124766
ZNFX1	CD14+ Monocyte	0.777346	5.82998	18.0738	8.43581e-05	0.00124766
MT-CO3	CD14+ Monocyte	-0.764931	13.1109	18.0068	8.65873e-05	0.00127775
RTN1	CD14+ Monocyte	-1.36368	4.94728	17.9337	8.91922e-05	0.00131029
MT-ND2	CD14+ Monocyte	-0.584692	11.7651	17.8685	9.14375e-05	0.00133133
DST	CD14+ Monocyte	-1.2273	4.62669	17.8179	9.33904e-05	0.00135257
TOB1	CD14+ Monocyte	-0.674751	6.30433	17.7527	9.57326e-05	0.00138159
BACH1	CD14+ Monocyte	0.532602	7.90709	17.7405	9.6185e-05	0.00138175
SNX20	CD14+ Monocyte	0.608111	5.72854	17.6933	9.80209e-05	0.0013992
C3orf38	CD14+ Monocyte	0.51249	4.99192	17.5768	0.000102723	0.00145365
ARID5B	CD14+ Monocyte	1.66266	4.0284	17.5199	0.000105342	0.00148111
IL15RA	CD14+ Monocyte	1.03364	3.76937	17.5077	0.000105876	0.00148544
GLUL	CD14+ Monocyte	0.748709	8.38698	17.4833	0.000106506	0.00149108
MRPS6	CD14+ Monocyte	-0.671819	5.26919	17.4417	0.000108315	0.00151318
MCRIP2	CD14+ Monocyte	-0.728972	4.94248	17.3096	0.000114179	0.00158161
TRIM21	CD14+ Monocyte	0.821422	4.80293	17.277	0.000115854	0.00159805
HIST1H2AC	CD14+ Monocyte	1.40447	4.23678	17.2613	0.000116693	0.00160097
NT5C3A	CD14+ Monocyte	1.75312	6.48885	17.2504	0.000116878	0.00160097
HLA-A	CD14+ Monocyte	0.753719	11.1526	17.2357	0.000117531	0.00160097
CBR1	CD14+ Monocyte	0.950958	5.61111	17.171	0.000120643	0.00163316
GIMAP7	CD14+ Monocyte	1.09888	7.67366	17.0809	0.000125033	0.00168563
CYTOR	CD14+ Monocyte	0.702649	5.83284	17.0685	0.000125708	0.00169125
UBE2J1	CD14+ Monocyte	0.59738	7.2471	17.0345	0.000127375	0.00171016
NUCB1	CD14+ Monocyte	0.556681	6.63372	17.0161	0.000128319	0.00171931
LAP3	CD14+ Monocyte	1.37964	8.15303	16.9882	0.000129755	0.00173501
PATL1	CD14+ Monocyte	0.656069	5.26415	16.9752	0.000130526	0.00174177
TAP1	CD14+ Monocyte	1.11897	6.74052	16.9607	0.0001312	0.0017472
GSE1	CD14+ Monocyte	-0.525032	5.17115	16.8986	0.000134568	0.00178119
MARCO	CD14+ Monocyte	1.508	5.54009	16.8478	0.000137327	0.00180313
GAS5	CD14+ Monocyte	-0.830402	7.35497	16.8109	0.00013932	0.00181476
CTNNB1	CD14+ Monocyte	-0.543631	7.58214	16.7949	0.000140215	0.00182279
LILRB4	CD14+ Monocyte	0.843803	6.65594	16.7426	0.0001432	0.00185792
MSRB1	CD14+ Monocyte	0.621399	7.25512	16.5807	0.000152842	0.00196357
HERC2	CD14+ Monocyte	-0.637872	4.22446	16.5677	0.000153988	0.00197443
GBP2	CD14+ Monocyte	1.12043	7.04385	16.4552	0.000160786	0.00205354
ETV7	CD14+ Monocyte	3.18485	3.7094	16.4018	0.000162034	0.00206546
LHFPL2	CD14+ Monocyte	1.20346	4.1885	16.3557	0.000167816	0.00212676
HSPA8	CD14+ Monocyte	-0.853033	8.19509	16.335	0.000168784	0.0021349
ARHGAP18	CD14+ Monocyte	0.576995	5.26206	16.3231	0.000169731	0.00214273
NT5C2	CD14+ Monocyte	0.525813	5.84313	16.3044	0.000170941	0.00215386
TRIM26	CD14+ Monocyte	0.542448	5.05888	16.2365	0.000175793	0.00220577
MT-CO2	CD14+ Monocyte	-0.529722	13.0385	16.2326	0.00017594	0.00220577
ST3GAL5	CD14+ Monocyte	0.815634	6.04107	16.2156	0.000177195	0.00220598
PSMB10	CD14+ Monocyte	0.51181	7.73864	16.2145	0.000177239	0.00220598
C5orf56	CD14+ Monocyte	0.842498	4.44541	16.1764	0.000180259	0.00223262
HAVCR2	CD14+ Monocyte	0.531213	5.64263	16.0966	0.00018597	0.00229037
ASCL2	CD14+ Monocyte	0.523257	4.94433	16.0768	0.000187525	0.00230086
RPA1	CD14+ Monocyte	-0.53951	4.05264	16.0193	0.000192371	0.00235152
SLC4A7	CD14+ Monocyte	-0.689235	4.66398	15.9201	0.000200021	0.00243142
AQP9	CD14+ Monocyte	1.48546	6.15784	15.8773	0.000203339	0.00246366
NPM1	CD14+ Monocyte	-0.571811	7.96432	15.8742	0.000203559	0.00246366
MT-ATP6	CD14+ Monocyte	-0.64174	12.7276	15.835	0.000206837	0.00249575
SNHG16	CD14+ Monocyte	-0.566645	5.65364	15.8282	0.000207458	0.00249865
HIST2H2AA4	CD14+ Monocyte	1.69149	5.56945	15.533	0.000215996	0.00258249
HK3	CD14+ Monocyte	0.553734	6.07007	15.7178	0.000217019	0.00258991
PTRH2	CD14+ Monocyte	0.505355	4.14992	15.6973	0.000219298	0.00260769
H3F3B	CD14+ Monocyte	0.509788	10.7936	15.6452	0.000223539	0.00263422
MFAP1	CD14+ Monocyte	0.612318	4.3598	15.6443	0.000224083	0.00263589
TRAPPC6A	CD14+ Monocyte	-0.760907	4.77046	15.6214	0.000225849	0.00265075
TLR1	CD14+ Monocyte	0.530724	5.77873	15.5845	0.000229252	0.00267451
FCER1G	CD14+ Monocyte	0.524774	10.1603	15.5761	0.000229966	0.00267451
ABHD14B	CD14+ Monocyte	-0.61049	4.28781	15.5776	0.00023012	0.00267451
SLC39A11	CD14+ Monocyte	0.511169	4.35986	15.5644	0.0002314	0.00268342
CCDC71L	CD14+ Monocyte	0.721096	4.04721	15.4996	0.000237804	0.00274795
CASP7	CD14+ Monocyte	0.829685	4.45916	15.4784	0.000239763	0.00276086
JAK2	CD14+ Monocyte	0.643697	6.99537	15.382	0.000249074	0.00284308
CTSA	CD14+ Monocyte	0.634157	7.22487	15.2641	0.000261458	0.00296893
GBP1	CD14+ Monocyte	2.46246	7.02438	15.2419	0.000263875	0.00298088
AHCY	CD14+ Monocyte	-0.638661	4.0243	15.2381	0.00026468	0.00298483
MOV10	CD14+ Monocyte	1.22087	4.00599	15.1803	0.000271397	0.00304485
MRPS22	CD14+ Monocyte	0.548731	5.03268	15.1628	0.000272761	0.00305284
RPL23	CD14+ Monocyte	-0.55765	10.0577	15.159	0.000273041	0.00305284
IVD	CD14+ Monocyte	-0.717489	4.16635	15.135	0.000276279	0.00306883
RNASE2	CD14+ Monocyte	1.77176	6.91305	15.0133	0.000290063	0.00319948
CD14	CD14+ Monocyte	0.53246	10.1156	14.8574	0.000309393	0.00336735
DDB2	CD14+ Monocyte	1.20559	3.84166	14.8545	0.000310675	0.00337569
ODF3B	CD14+ Monocyte	0.591595	6.41551	14.7924	0.000317894	0.00344271
MAGED2	CD14+ Monocyte	0.583505	4.28062	14.6409	0.000339049	0.0036537
RRAS	CD14+ Monocyte	0.762086	6.20815	14.6031	0.000343989	0.00370084
MAFB	CD14+ Monocyte	0.799247	8.60599	14.5787	0.000347471	0.00372607
ELMO2	CD14+ Monocyte	0.791609	3.95813	14.569	0.000349735	0.00374422
SMAD5	CD14+ Monocyte	-0.523143	4.56901	14.563	0.000350339	0.00374457
IL15	CD14+ Monocyte	0.758694	5.50805	14.5489	0.000351943	0.00375559
NABP1	CD14+ Monocyte	0.649858	6.72863	14.5268	0.00035511	0.00377096
AC083862.3	CD14+ Monocyte	1.08788	3.57416	14.4555	0.00036668	0.00388752
HSP90AB1	CD14+ Monocyte	-0.569821	8.28505	14.4213	0.000371115	0.00392185
NAP1L1	CD14+ Monocyte	-0.619124	8.34585	14.411	0.000372725	0.00393251
GTPBP2	CD14+ Monocyte	0.688279	4.48291	14.3212	0.000387714	0.00405836
SRSF8	CD14+ Monocyte	-0.864332	3.99756	14.3172	0.000388397	0.00405866
N4BP1	CD14+ Monocyte	0.614042	6.15377	14.3058	0.000389584	0.00406181
Z83843.1	CD14+ Monocyte	-0.682774	4.09564	14.268	0.000396684	0.00412551
GSDMD	CD14+ Monocyte	0.680135	6.10826	14.2289	0.000402343	0.00415772
HIST1H1D	CD14+ Monocyte	1.1605	5.01549	14.1611	0.0004145	0.00426343
APEX1	CD14+ Monocyte	-0.760762	6.01998	14.1512	0.000415699	0.00426906
C3AR1	CD14+ Monocyte	1.20007	6.76756	14.1314	0.000419182	0.00429809
LILRB1	CD14+ Monocyte	0.978016	7.37992	14.0797	0.00042839	0.00437718
REPIN1	CD14+ Monocyte	-0.6039	4.82578	14.0391	0.00043599	0.00444262
RBM3	CD14+ Monocyte	-0.528825	8.21364	13.9951	0.000443939	0.00448872
ZNF688	CD14+ Monocyte	0.510772	4.34095	13.903	0.000462105	0.00462953
APOL6	CD14+ Monocyte	1.02057	7.13902	13.8887	0.000464355	0.00464497
SIGLEC7	CD14+ Monocyte	0.564473	5.12923	13.8592	0.000470487	0.00469198
TATDN3	CD14+ Monocyte	0.622158	4.60389	13.8537	0.000471786	0.00469254
UBA7	CD14+ Monocyte	0.629119	4.95836	13.8455	0.000473163	0.00469254
ZNF766	CD14+ Monocyte	0.650117	3.86208	13.8345	0.000476143	0.00470661
ALPK1	CD14+ Monocyte	0.656374	5.2799	13.8149	0.000479389	0.00473036
TIFA	CD14+ Monocyte	1.25036	3.6506	13.8041	0.000482217	0.00475111
TPMT	CD14+ Monocyte	0.603276	5.6662	13.7203	0.00049876	0.00487743
SRPRB	CD14+ Monocyte	-0.513483	3.9058	13.6831	0.000507553	0.00493396
SRM	CD14+ Monocyte	-0.578159	5.02426	13.6658	0.000510488	0.00495514
S1PR3	CD14+ Monocyte	0.851172	5.07262	13.5595	0.000534225	0.0051626
MRPS25	CD14+ Monocyte	-0.513368	4.88271	13.5445	0.000537563	0.0051872
DDIT3	CD14+ Monocyte	0.612103	5.2946	13.5113	0.000545181	0.00525298
AL133453.1	CD14+ Monocyte	0.567307	4.19467	13.4323	0.000564605	0.00540043
DIP2A	CD14+ Monocyte	-0.607731	5.21386	13.4209	0.000566627	0.00540246
ADAM15	CD14+ Monocyte	-0.586976	5.64111	13.4198	0.000566726	0.00540246
CERK	CD14+ Monocyte	-0.532593	5.33062	13.4179	0.000567291	0.00540246
CTSD	CD14+ Monocyte	0.64655	9.25559	13.378	0.000576853	0.00547398
TPGS2	CD14+ Monocyte	-0.569015	4.24687	13.3758	0.000578076	0.00547398
DTNBP1	CD14+ Monocyte	0.592978	4.95572	13.3737	0.000578143	0.00547398
SHMT2	CD14+ Monocyte	-0.50339	4.26164	13.2609	0.000607078	0.0057067
VAMP5	CD14+ Monocyte	1.31612	7.3457	13.2326	0.000613865	0.005754
SLC27A3	CD14+ Monocyte	0.523838	5.9176	13.2217	0.000616777	0.0057648
KIAA0040	CD14+ Monocyte	0.60192	5.09557	13.1577	0.000634229	0.00589428
TENT5A	CD14+ Monocyte	0.619162	6.35204	13.1418	0.000638275	0.00592348
CLN8	CD14+ Monocyte	-0.519032	4.54881	13.1354	0.000640489	0.00593562
MAVS	CD14+ Monocyte	-0.532242	5.25374	13.1239	0.000643331	0.00594319
HPSE	CD14+ Monocyte	0.713501	5.72541	13.1145	0.000645842	0.00594319
EXOC6	CD14+ Monocyte	0.561626	5.43662	13.0766	0.000656593	0.00601678
C20orf194	CD14+ Monocyte	-0.548005	4.26421	13.0151	0.000674707	0.00615694
DNASE2	CD14+ Monocyte	0.775858	5.70431	12.9646	0.000688828	0.00624233
SAT1	CD14+ Monocyte	0.546365	10.8804	12.9325	0.000698268	0.00631042
GCH1	CD14+ Monocyte	0.857251	6.40405	12.8765	0.000715355	0.00643819
PEBP1	CD14+ Monocyte	-0.71894	5.21047	12.8697	0.000717567	0.00644925
ADPRH	CD14+ Monocyte	0.612879	4.03455	12.8583	0.00072232	0.00648306
ANXA2R	CD14+ Monocyte	0.920026	3.6364	12.7958	0.000741577	0.00660165
TCF4	CD14+ Monocyte	0.857195	5.04937	12.7824	0.000745598	0.00662844
MSRB2	CD14+ Monocyte	0.518595	5.94111	12.7214	0.000764918	0.00679098
TGFBI	CD14+ Monocyte	-0.535898	7.59295	12.7095	0.000768781	0.00681604
KDM2B	CD14+ Monocyte	-0.527453	4.38749	12.6875	0.000776919	0.00685144
CBWD3	CD14+ Monocyte	0.635454	3.7027	12.6584	0.000787638	0.00692699
CYSLTR1	CD14+ Monocyte	0.656155	5.82829	12.6383	0.000792996	0.00696476
PSMA4	CD14+ Monocyte	0.50422	7.85703	12.5448	0.000825637	0.00719358
LYRM4	CD14+ Monocyte	-0.534089	4.06696	12.481	0.000849803	0.0073262
NLN	CD14+ Monocyte	-0.546564	4.77835	12.4203	0.000872265	0.0075001
RPS4Y1	CD14+ Monocyte	-0.679076	7.32775	14.5403	0.000882543	0.00755028
FCN1	CD14+ Monocyte	0.537081	11.3307	12.389	0.00088343	0.00755028
PIK3AP1	CD14+ Monocyte	0.533385	7.3467	12.3656	0.000892523	0.00758498
SFXN5	CD14+ Monocyte	-0.598034	4.56383	12.3639	0.000893911	0.00758498
APOL2	CD14+ Monocyte	0.694479	4.6755	12.3628	0.000894096	0.00758498
CYSTM1	CD14+ Monocyte	0.816866	5.40772	12.3552	0.000896747	0.00758498
BCL2L11	CD14+ Monocyte	0.610721	5.54045	12.3545	0.000897096	0.00758498
MAD2L1BP	CD14+ Monocyte	0.626914	3.56951	12.3218	0.000911441	0.00767578
APOL1	CD14+ Monocyte	1.00655	4.14053	12.2631	0.000934686	0.00782128
SWAP70	CD14+ Monocyte	0.569044	5.32628	12.2368	0.00094437	0.00785603
NECTIN2	CD14+ Monocyte	1.25036	3.78551	12.0359	0.00103261	0.00844651
CCR2	CD14+ Monocyte	0.656756	6.06532	12.0247	0.001036	0.00846372
PCID2	CD14+ Monocyte	0.545889	4.5321	11.9952	0.00105019	0.00854764
NAT9	CD14+ Monocyte	-0.653499	4.23065	11.9907	0.00105215	0.00855293
COA6	CD14+ Monocyte	0.527339	5.75712	11.9548	0.00106822	0.00863008
DYSF	CD14+ Monocyte	0.951598	5.92351	11.9202	0.00108455	0.00875121
DTD1	CD14+ Monocyte	-0.596203	4.10035	11.9087	0.00109104	0.00879273
BTN3A3	CD14+ Monocyte	0.783081	4.35827	11.8597	0.00111494	0.00894133
MRPL17	CD14+ Monocyte	0.565715	4.20546	11.8466	0.00112164	0.00898407
LYSMD2	CD14+ Monocyte	0.582673	6.37102	11.824	0.00113128	0.0090172
RASA4	CD14+ Monocyte	-1.39145	4.06184	11.8019	0.00114407	0.00908555
MXD1	CD14+ Monocyte	0.654651	7.6809	11.7958	0.0011454	0.00908555
MT-CYB	CD14+ Monocyte	-0.663761	12.0569	11.7791	0.00115382	0.00911343
IRF2BPL	CD14+ Monocyte	0.645373	5.1178	11.7777	0.00115524	0.00911343
GNA12	CD14+ Monocyte	-0.599856	4.29032	11.7687	0.00116013	0.00913323
FAM241A	CD14+ Monocyte	0.550744	4.63096	11.7109	0.00118982	0.00930271
POLB	CD14+ Monocyte	0.548075	4.28078	11.6795	0.00120727	0.00940529
SH2D3C	CD14+ Monocyte	0.530888	5.31762	11.6562	0.00121844	0.00945876
PARP11	CD14+ Monocyte	0.692164	4.28907	11.5958	0.00125272	0.00964688
BRI3BP	CD14+ Monocyte	-0.568059	5.07567	11.5928	0.00125315	0.00964688
TRIM25	CD14+ Monocyte	0.528865	6.1821	11.5898	0.00125445	0.00964688
MILR1	CD14+ Monocyte	0.626511	4.68928	11.5678	0.00126741	0.0097026
AC024560.5	CD14+ Monocyte	0.763371	3.26951	11.5691	0.00126849	0.0097026
SP140L	CD14+ Monocyte	0.505743	5.011	11.5649	0.00126877	0.0097026
PIM1	CD14+ Monocyte	1.01848	6.15979	11.5413	0.0012817	0.00978756
AC010642.2	CD14+ Monocyte	-0.85698	4.0601	11.3684	0.00138514	0.0104535
LIMK2	CD14+ Monocyte	0.980738	4.24555	11.3451	0.0013996	0.0105227
IL1RN	CD14+ Monocyte	1.07953	6.45679	11.3414	0.00140045	0.0105227
AL121933.2	CD14+ Monocyte	0.55065	4.81263	11.2497	0.00145925	0.0108823
SLC16A6	CD14+ Monocyte	0.550481	5.47358	11.2354	0.00146843	0.0109083
CHSY1	CD14+ Monocyte	0.52206	5.4647	11.0966	0.00156205	0.0114609
MT-ND3	CD14+ Monocyte	-0.582229	12.5191	11.0545	0.00159141	0.0116121
SAMD4A	CD14+ Monocyte	1.35875	5.1395	11.0448	0.00159903	0.0116539
MRPL44	CD14+ Monocyte	0.545236	4.90883	11.01	0.00162434	0.0117841
PSME2	CD14+ Monocyte	0.785608	8.5139	10.9459	0.00167074	0.0120161
TAP2	CD14+ Monocyte	0.758829	5.52036	10.9338	0.00168008	0.0120436
MTHFD2	CD14+ Monocyte	0.623767	6.16963	10.8887	0.00171428	0.0121712
GPR65	CD14+ Monocyte	0.578959	6.27081	10.8786	0.00172203	0.0121976
S100A8	CD14+ Monocyte	0.95108	13.7239	10.8606	0.00173593	0.0122167
TMEM150B	CD14+ Monocyte	0.797498	3.57817	10.8111	0.00177857	0.0123838
RNF8	CD14+ Monocyte	0.539464	3.71888	10.8006	0.00178179	0.0123931
EXOSC6	CD14+ Monocyte	-0.686307	5.0267	10.7911	0.00179141	0.0124336
GCNT1	CD14+ Monocyte	0.773722	4.11411	10.7756	0.00180554	0.012509
BISPR	CD14+ Monocyte	0.709486	4.28685	10.7584	0.00181964	0.0125424
SLFN5	CD14+ Monocyte	1.21651	6.31241	10.7523	0.00182278	0.012545
BTN3A1	CD14+ Monocyte	0.655937	4.92273	10.7382	0.00183493	0.0126154
SLFN12	CD14+ Monocyte	0.645298	4.92338	10.7274	0.00184434	0.0126668
SNRNP25	CD14+ Monocyte	-0.592082	4.28133	10.7153	0.00185436	0.0127223
RAB11FIP4	CD14+ Monocyte	0.675547	4.30558	10.7003	0.0018674	0.0127983
ST14	CD14+ Monocyte	1.10441	4.60171	10.6919	0.00187451	0.0128202
GIMAP8	CD14+ Monocyte	0.567475	6.18173	10.6632	0.00189738	0.0129362
TCF7L2	CD14+ Monocyte	0.796155	6.30212	10.6461	0.00191198	0.0129816
PVR	CD14+ Monocyte	-0.607341	3.93144	10.6023	0.00195221	0.0131729
GPATCH11	CD14+ Monocyte	-0.600513	4.06571	10.3022	0.002236	0.0147377
CCL2	CD14+ Monocyte	3.69473	4.62186	10.248	0.00225968	0.0147907
CLEC4D	CD14+ Monocyte	0.787744	5.51145	10.1924	0.00234869	0.0152816
CHROMR	CD14+ Monocyte	0.810919	4.0208	10.1714	0.00237357	0.0154129
GPD2	CD14+ Monocyte	0.617669	5.02536	10.1351	0.00241166	0.0155677
FPR2	CD14+ Monocyte	1.10275	5.82062	10.1265	0.00242039	0.0156086
ABCE1	CD14+ Monocyte	-0.658834	5.0166	10.1235	0.00242389	0.0156091
VASH1	CD14+ Monocyte	-1.28569	4.17167	10.1214	0.00242761	0.0156091
BX284668.5	CD14+ Monocyte	-0.718974	4.33219	10.1005	0.00245051	0.0156947
SNCA	CD14+ Monocyte	-0.706225	3.6395	10.0854	0.00246941	0.0157849
PLCB1	CD14+ Monocyte	-0.795571	5.11941	10.0667	0.00248745	0.0158538
GBP4	CD14+ Monocyte	1.42772	6.13536	10.052	0.00250388	0.015943
ZNF91	CD14+ Monocyte	-0.626587	4.13138	10.0459	0.00251318	0.0159592
AHNAK	CD14+ Monocyte	-0.556092	9.75353	10.0087	0.00255374	0.0161304
JAK3	CD14+ Monocyte	0.85789	5.78302	9.99184	0.00257407	0.0161855
P2RX7	CD14+ Monocyte	0.622356	5.4939	9.97836	0.00258985	0.0162536
LMNA	CD14+ Monocyte	-1.67256	6.94719	9.9559	0.00261634	0.0163884
SOCS3	CD14+ Monocyte	0.988124	7.4905	9.90928	0.00267268	0.0167094
SIPA1L2	CD14+ Monocyte	0.721583	4.01692	9.89758	0.0026904	0.0167721
CYBRD1	CD14+ Monocyte	-0.828373	4.28988	9.86883	0.00272542	0.016894
TMEM144	CD14+ Monocyte	0.745857	4.34589	9.85423	0.00274397	0.0169762
GBP5	CD14+ Monocyte	1.91886	5.56808	9.80886	0.0027992	0.017181
NR4A2	CD14+ Monocyte	-0.704177	7.64942	9.80744	0.00280056	0.017181
PIM3	CD14+ Monocyte	0.671207	6.99346	9.79615	0.00281517	0.0172544
CD300E	CD14+ Monocyte	0.71103	7.89393	9.76512	0.00285558	0.0173921
ADPRHL2	CD14+ Monocyte	0.530206	4.36351	9.75145	0.00287569	0.0174459
ANKRD22	CD14+ Monocyte	2.41887	4.45088	9.72583	0.00291114	0.0176093
AC091271.1	CD14+ Monocyte	0.716365	4.53977	9.7059	0.00293641	0.0177321
HMOX1	CD14+ Monocyte	0.52554	6.81493	9.68489	0.00296309	0.0177918
S100A9	CD14+ Monocyte	0.633213	14.4831	9.67919	0.00297079	0.0177918
FLVCR2	CD14+ Monocyte	0.641087	4.4395	9.64066	0.00302714	0.0180364
CHML	CD14+ Monocyte	-0.572893	4.71908	9.63289	0.00303637	0.0180693
U62317.4	CD14+ Monocyte	0.751085	4.18585	9.58028	0.00311216	0.0183908
PNPT1	CD14+ Monocyte	0.862711	5.37337	9.4851	0.00325046	0.0190663
TMEM60	CD14+ Monocyte	0.580982	4.46205	9.4379	0.00332389	0.019379
ZEB2-AS1	CD14+ Monocyte	0.570012	4.98431	9.41143	0.00336303	0.0195169
OTUD1	CD14+ Monocyte	0.608871	6.90204	9.34802	0.00346269	0.019989
TMEM14C	CD14+ Monocyte	-0.649753	6.15294	9.32121	0.00350616	0.0201512
CACNA2D3	CD14+ Monocyte	-0.707287	4.51792	9.28436	0.00356807	0.0204353
HLA-DQA1	CD14+ Monocyte	-1.75922	6.22994	9.12595	0.00383997	0.0216149
ATOX1	CD14+ Monocyte	0.517845	7.07336	9.082	0.00391949	0.0219868
ARHGEF3	CD14+ Monocyte	0.53747	5.40621	9.06676	0.00394823	0.022129
HES4	CD14+ Monocyte	1.58158	4.79491	9.06295	0.00396031	0.0221399
KDSR	CD14+ Monocyte	-0.545863	4.4591	9.02304	0.0040308	0.0224379
TAPBPL	CD14+ Monocyte	0.52406	4.3923	9.01645	0.00404339	0.0224525
CDC42EP2	CD14+ Monocyte	0.7856	4.30436	9.0106	0.00405534	0.0224816
IER3	CD14+ Monocyte	-1.16829	8.00873	8.96857	0.00413317	0.0227951
TBCC	CD14+ Monocyte	0.532472	4.14957	8.95549	0.00416172	0.0229139
NKG7	CD14+ Monocyte	1.7367	5.72371	8.93791	0.00419471	0.0230363
ADRB2	CD14+ Monocyte	0.780751	4.65101	8.91182	0.00424657	0.0231669
NIBAN1	CD14+ Monocyte	0.559505	6.52728	8.82269	0.00442626	0.0239677
TBC1D12	CD14+ Monocyte	-0.653052	4.197	8.77483	0.00452944	0.0242855
WDFY1	CD14+ Monocyte	0.509604	5.85024	8.71006	0.00466761	0.0249238
PI4K2B	CD14+ Monocyte	0.712181	3.95197	8.70201	0.00468981	0.0250022
DAB2	CD14+ Monocyte	0.756259	4.29227	8.67679	0.00474581	0.0252186
GAS6	CD14+ Monocyte	0.976909	4.25648	8.67244	0.00475453	0.0252445
HLA-DMB	CD14+ Monocyte	-0.592632	7.52651	8.63265	0.00484084	0.0256612
EXOSC9	CD14+ Monocyte	0.541401	4.60753	8.59947	0.00492024	0.0259742
MT-ND4L	CD14+ Monocyte	-0.532133	8.80538	8.5849	0.00495134	0.0260991
CISD1	CD14+ Monocyte	0.645242	4.38288	8.57312	0.00498181	0.0262175
SLAMF7	CD14+ Monocyte	1.70246	4.29606	8.53106	0.00508332	0.0266234
TNFAIP6	CD14+ Monocyte	1.59516	4.04345	8.47872	0.00519928	0.0270577
AP1S2	CD14+ Monocyte	-0.536282	9.44771	8.43989	0.00530351	0.0275128
ALDH1A1	CD14+ Monocyte	-1.00561	5.83094	8.4111	0.00537689	0.0278054
SIGLEC10	CD14+ Monocyte	0.604843	5.57176	8.40215	0.00540023	0.027904
GBP3	CD14+ Monocyte	0.844625	4.6213	8.34265	0.00555749	0.0284697
MICB	CD14+ Monocyte	0.672206	4.20803	8.32149	0.00561552	0.0286996
LPAR6	CD14+ Monocyte	0.557206	6.18467	8.29643	0.00567842	0.0289766
LDLRAD4	CD14+ Monocyte	-0.520743	4.33819	8.20494	0.0059344	0.0299324
GIMAP6	CD14+ Monocyte	0.536871	5.1943	8.14867	0.00609471	0.0305066
ARRDC3	CD14+ Monocyte	0.556663	6.29896	8.14641	0.00609976	0.0305081
MAP2K6	CD14+ Monocyte	0.874931	4.74658	8.09526	0.00625469	0.031046
TMEM106A	CD14+ Monocyte	0.553528	4.30256	8.07504	0.00631524	0.0311812
H1F0	CD14+ Monocyte	1.01296	5.47449	7.9747	0.00662543	0.0324438
PARP10	CD14+ Monocyte	0.677063	4.84143	7.91006	0.00683359	0.0331411
MT1X	CD14+ Monocyte	0.78457	5.52056	7.86597	0.00697973	0.0337002
MANF	CD14+ Monocyte	-0.510478	4.76549	7.8097	0.00717174	0.0343489
HLX	CD14+ Monocyte	0.700328	4.86092	7.79713	0.00721662	0.0345256
ABCA1	CD14+ Monocyte	0.86851	4.3309	7.78691	0.00725449	0.0346186
LDHB	CD14+ Monocyte	-0.592366	6.0815	7.73293	0.00744159	0.0353314
CRISPLD2	CD14+ Monocyte	0.69611	5.47347	7.70538	0.00754206	0.0356791
LILRA1	CD14+ Monocyte	0.509735	6.54143	7.68284	0.00762404	0.035989
PFKP	CD14+ Monocyte	0.679481	3.65717	7.65218	0.00774527	0.0364562
SPTLC2	CD14+ Monocyte	0.548097	7.3934	7.61566	0.00787622	0.0369135
RAB13	CD14+ Monocyte	0.718075	4.01128	7.60172	0.00793598	0.0371404
ANKRD28	CD14+ Monocyte	0.58285	6.65445	7.55046	0.0081296	0.0379652
ADM	CD14+ Monocyte	1.02265	4.92986	7.54432	0.00815613	0.037967
HLA-F	CD14+ Monocyte	0.542039	7.85462	7.543	0.00815897	0.037967
PID1	CD14+ Monocyte	-1.05129	5.43496	7.46216	0.00848685	0.038985
VEGFA	CD14+ Monocyte	-0.713291	5.42245	7.4613	0.00849078	0.038985
GM2A	CD14+ Monocyte	0.645827	6.21364	7.44779	0.00854624	0.0391014
RIN1	CD14+ Monocyte	0.818471	4.60713	7.41432	0.00869031	0.0396004
FPR1	CD14+ Monocyte	0.565772	8.35169	7.33113	0.00904662	0.040773
DLEU2	CD14+ Monocyte	0.624929	6.11455	7.27514	0.00929849	0.0416455
SNHG8	CD14+ Monocyte	-0.536884	6.44456	7.25313	0.00939878	0.0420347
MCTP2	CD14+ Monocyte	1.57086	4.37828	7.15897	0.00980835	0.0434512
PLAAT4	CD14+ Monocyte	0.894993	6.15158	7.01466	0.0105678	0.0462528
SGMS2	CD14+ Monocyte	-0.663794	5.69391	6.8346	0.0115527	0.0494081
CD82	CD14+ Monocyte	0.788891	4.53459	6.83345	0.011564	0.0494244
SIGLEC1	CD16+ Monocyte	6.01924	5.48185	58.1087	1.45547e-10	9.85207e-07
IFI44L	CD16+ Monocyte	4.25447	8.46447	55.6247	1.23243e-09	4.17116e-06
XAF1	CD16+ Monocyte	2.24253	8.67923	50.5522	4.26519e-09	9.62369e-06
EPSTI1	CD16+ Monocyte	2.26298	8.14264	49.363	5.76609e-09	9.75766e-06
IFI44	CD16+ Monocyte	3.21241	6.92532	48.3727	7.50462e-09	1.01598e-05
OASL	CD16+ Monocyte	3.89311	6.53408	46.9499	1.10253e-08	1.08698e-05
MS4A4A	CD16+ Monocyte	2.01254	7.34786	46.736	1.13814e-08	1.08698e-05
KIAA1958	CD16+ Monocyte	2.84831	3.73445	44.1366	1.39354e-08	1.08698e-05
EIF2AK2	CD16+ Monocyte	1.88759	7.34883	45.5335	1.56299e-08	1.08698e-05
DDX60	CD16+ Monocyte	1.78286	6.08099	45.4547	1.60582e-08	1.08698e-05
ZCCHC2	CD16+ Monocyte	1.25096	5.95994	43.8321	2.47778e-08	1.52473e-05
IFI27	CD16+ Monocyte	6.19569	9.31896	43.0569	3.08334e-08	1.73926e-05
OTOF	CD16+ Monocyte	8.08861	4.58768	40.5996	4.43596e-08	2.30977e-05
SP100	CD16+ Monocyte	0.854254	7.83774	40.5506	6.09297e-08	2.94595e-05
SP110	CD16+ Monocyte	0.91697	8.23264	37.7361	1.36159e-07	5.99712e-05
USP18	CD16+ Monocyte	4.0658	5.53621	37.3264	1.41755e-07	5.99712e-05
IRF7	CD16+ Monocyte	2.17041	7.83206	37.3171	1.53878e-07	6.12705e-05
IFI6	CD16+ Monocyte	2.92664	8.95933	35.6152	2.54207e-07	9.55959e-05
MRPL42	CD16+ Monocyte	0.786563	5.71577	35.296	2.80543e-07	9.9947e-05
LGALS3BP	CD16+ Monocyte	3.17974	5.55319	34.8749	3.23704e-07	0.000105339
DHX58	CD16+ Monocyte	2.10633	4.81476	34.838	3.27974e-07	0.000105339
MX1	CD16+ Monocyte	2.71124	8.434	34.4017	3.66211e-07	0.000105339
NEXN	CD16+ Monocyte	3.04092	5.18194	34.235	3.72591e-07	0.000105339
KRT10	CD16+ Monocyte	-1.27668	5.97624	34.3193	3.75877e-07	0.000105339
CIR1	CD16+ Monocyte	0.757914	7.18578	34.078	4.03925e-07	0.000105339
IFITM2	CD16+ Monocyte	1.19798	10.793	34.071	4.04612e-07	0.000105339
IFITM3	CD16+ Monocyte	2.0106	11.0908	33.9066	4.25365e-07	0.000106641
OAS3	CD16+ Monocyte	2.07005	6.97701	32.9679	5.67899e-07	0.00013729
HERC5	CD16+ Monocyte	2.94142	6.77603	32.6624	6.26811e-07	0.000146306
MAP2K3	CD16+ Monocyte	-0.514456	6.85038	32.406	6.75245e-07	0.000152358
ODF3B	CD16+ Monocyte	0.990272	6.19358	32.2379	7.11961e-07	0.00015546
GMPR	CD16+ Monocyte	3.0869	4.51744	31.8312	7.53175e-07	0.000156169
PLSCR1	CD16+ Monocyte	1.90518	7.92065	32.0204	7.6135e-07	0.000156169
STRAP	CD16+ Monocyte	-0.650946	5.98613	31.8892	7.93915e-07	0.000158059
ATP10A	CD16+ Monocyte	1.79008	3.80037	30.937	8.63869e-07	0.000162112
RSAD2	CD16+ Monocyte	4.48149	7.41836	31.5758	8.86119e-07	0.000162112
DNTTIP1	CD16+ Monocyte	0.910858	5.67742	31.3827	9.32074e-07	0.000166032
LY6E	CD16+ Monocyte	1.65119	9.89452	31.1561	9.98316e-07	0.000173272
MRPS18C	CD16+ Monocyte	0.836648	6.84327	30.9972	1.05058e-06	0.000176467
IFIT1	CD16+ Monocyte	4.10134	8.19233	30.8943	1.09006e-06	0.000176467
MX2	CD16+ Monocyte	1.88089	8.03627	30.7965	1.11896e-06	0.000176467
SERPING1	CD16+ Monocyte	4.33775	5.87272	30.658	1.121e-06	0.000176467
CMPK2	CD16+ Monocyte	2.42195	6.26245	30.6759	1.17221e-06	0.000176684
CYSLTR1	CD16+ Monocyte	0.594309	6.43487	30.5302	1.21864e-06	0.000176684
SAMD9	CD16+ Monocyte	1.63363	7.93619	30.4662	1.24307e-06	0.000176684
SAMD9L	CD16+ Monocyte	1.75712	7.83688	30.4431	1.25226e-06	0.000176684
MT-ATP6	CD16+ Monocyte	-1.15397	12.9696	30.4402	1.2529e-06	0.000176684
TMA7	CD16+ Monocyte	-0.57407	8.57757	29.9844	1.44953e-06	0.000191719
MT-CO1	CD16+ Monocyte	-0.908777	13.5237	29.9612	1.46029e-06	0.000191719
BISPR	CD16+ Monocyte	1.0543	4.49672	30.0027	1.46136e-06	0.000191719
TRIM22	CD16+ Monocyte	1.4069	7.85841	29.9358	1.4728e-06	0.000191719
USP15	CD16+ Monocyte	0.576599	7.96011	29.8262	1.52524e-06	0.000194799
OAS2	CD16+ Monocyte	1.88212	7.25793	29.6182	1.63227e-06	0.000204608
NMI	CD16+ Monocyte	1.074	7.52174	29.4845	1.70305e-06	0.000209599
CD2AP	CD16+ Monocyte	1.59132	5.34698	29.3837	1.77671e-06	0.000211159
AIM2	CD16+ Monocyte	2.78021	5.46744	29.3936	1.77812e-06	0.000211159
DTX3L	CD16+ Monocyte	1.17318	6.51934	29.2707	1.82743e-06	0.000213273
MT-ND4	CD16+ Monocyte	-1.16196	12.1404	28.8864	2.06688e-06	0.00023325
IFIT3	CD16+ Monocyte	2.87335	8.44828	28.8874	2.06752e-06	0.00023325
MT-CYB	CD16+ Monocyte	-1.50994	12.0269	28.7209	2.1815e-06	0.000238808
SLC9A3R1	CD16+ Monocyte	-0.815018	6.10036	28.7159	2.18734e-06	0.000238808
IFI35	CD16+ Monocyte	1.63345	7.38821	28.2714	2.52837e-06	0.000267924
AGO1	CD16+ Monocyte	-0.876124	5.51565	28.2734	2.53318e-06	0.000267924
TATDN3	CD16+ Monocyte	0.789801	5.55964	28.1132	2.66884e-06	0.000274134
MT-CO3	CD16+ Monocyte	-1.1753	12.8676	28.0582	2.71091e-06	0.000274134
ANKRD22	CD16+ Monocyte	4.94296	4.63828	27.1622	2.74825e-06	0.000274134
ZBP1	CD16+ Monocyte	3.14885	5.29771	27.9955	2.77031e-06	0.000274134
PARP14	CD16+ Monocyte	1.59273	8.32013	27.9666	2.79439e-06	0.000274134
MSR1	CD16+ Monocyte	2.23078	5.34778	27.8249	2.96688e-06	0.000286897
MT-CO2	CD16+ Monocyte	-0.944186	13.1736	27.7285	3.02257e-06	0.000288166
KLHDC7B	CD16+ Monocyte	2.0961	5.03715	27.6295	3.16315e-06	0.000294682
TNFSF10	CD16+ Monocyte	1.89401	9.89672	27.5524	3.20427e-06	0.000294682
TRIM69	CD16+ Monocyte	1.23648	5.72149	27.5422	3.22152e-06	0.000294682
JAK2	CD16+ Monocyte	0.872266	6.88462	27.4248	3.34521e-06	0.000301916
TNFSF13B	CD16+ Monocyte	1.08958	8.51479	27.1968	3.60678e-06	0.000321241
IFITM1	CD16+ Monocyte	3.0523	8.76915	27.1182	3.72756e-06	0.000327686
LMNB1	CD16+ Monocyte	2.08657	4.75399	27.0567	3.82521e-06	0.00033196
MNDA	CD16+ Monocyte	1.02958	10.0364	26.7761	4.1513e-06	0.000355698
LUC7L3	CD16+ Monocyte	-0.626351	6.69476	26.4797	4.58808e-06	0.000386759
CHMP5	CD16+ Monocyte	1.02645	7.20507	26.4536	4.62808e-06	0.000386759
IFI16	CD16+ Monocyte	1.07297	8.49245	26.3345	4.81656e-06	0.000397601
DDIT3	CD16+ Monocyte	1.14972	5.19089	26.2868	4.92137e-06	0.000400558
HSH2D	CD16+ Monocyte	1.01258	6.34609	26.244	4.97073e-06	0.000400558
LEPROTL1	CD16+ Monocyte	0.558696	7.16314	25.9177	5.54737e-06	0.000441767
TMEM123	CD16+ Monocyte	1.03711	8.19822	25.6888	5.9957e-06	0.000471918
SLC25A3	CD16+ Monocyte	-0.512099	8.5189	25.6477	6.07982e-06	0.000472561
WASF2	CD16+ Monocyte	-0.525688	8.39053	25.6172	6.1435e-06	0.000472561
ISG15	CD16+ Monocyte	2.93985	10.1667	25.519	6.35264e-06	0.000476745
MT-ND3	CD16+ Monocyte	-1.08888	12.4588	25.4954	6.40379e-06	0.000476745
CCR1	CD16+ Monocyte	1.60743	7.01575	25.4877	6.42937e-06	0.000476745
LKAAEAR1	CD16+ Monocyte	-1.63847	3.6131	25.436	6.50413e-06	0.000476745
AC009950.1	CD16+ Monocyte	1.1401	5.23929	25.4418	6.55006e-06	0.000476745
HLA-F	CD16+ Monocyte	0.772293	8.38071	25.3346	6.76647e-06	0.000487257
DDX58	CD16+ Monocyte	1.77726	6.62386	25.3091	6.84061e-06	0.000487411
PARP9	CD16+ Monocyte	1.49981	7.3039	25.2338	7.00686e-06	0.000494057
EIF3L	CD16+ Monocyte	-1.25567	6.77029	24.7012	8.41675e-06	0.000585086
EIF4B	CD16+ Monocyte	-1.14449	7.24456	24.6822	8.47073e-06	0.000585086
IFIT2	CD16+ Monocyte	2.57932	8.13719	24.4883	9.06135e-06	0.000615404
SNRNP200	CD16+ Monocyte	-0.613415	5.62409	24.4827	9.0915e-06	0.000615404
ICAM2	CD16+ Monocyte	0.575496	7.29465	24.3337	9.55815e-06	0.000640585
PTPRO	CD16+ Monocyte	1.05626	4.52039	24.2374	9.88879e-06	0.000656247
ADAR	CD16+ Monocyte	0.752203	7.72233	24.1167	1.03078e-05	0.000671276
IFIH1	CD16+ Monocyte	1.78396	6.80842	24.1203	1.03136e-05	0.000671276
APOBEC3A	CD16+ Monocyte	1.96605	9.67437	23.7582	1.16826e-05	0.000753135
LGALS9	CD16+ Monocyte	0.660032	7.93447	23.6932	1.19529e-05	0.000763294
FRMD3	CD16+ Monocyte	2.11206	4.10071	23.3671	1.32914e-05	0.000840837
MT-ND1	CD16+ Monocyte	-0.713797	12.1287	23.0554	1.49657e-05	0.000929385
MLEC	CD16+ Monocyte	-0.724095	5.51158	23.0259	1.51478e-05	0.000932138
SCO2	CD16+ Monocyte	0.991513	7.58898	22.8864	1.5893e-05	0.000969188
SPATS2L	CD16+ Monocyte	2.44512	5.35187	22.6735	1.73046e-05	0.00104585
FFAR2	CD16+ Monocyte	2.09711	6.43208	22.5257	1.80931e-05	0.00108383
ISG20	CD16+ Monocyte	2.61518	7.18763	22.4876	1.83377e-05	0.00108884
HIST1H2AC	CD16+ Monocyte	1.7143	5.41043	22.393	1.90745e-05	0.00112274
RPS16	CD16+ Monocyte	-0.855581	10.6054	22.2187	2.0169e-05	0.00117693
MT-ND4L	CD16+ Monocyte	-0.904544	8.4843	22.1166	2.09238e-05	0.00121054
EEF1B2	CD16+ Monocyte	-1.08602	9.03316	22.0624	2.1335e-05	0.00122387
GLUL	CD16+ Monocyte	0.857974	8.2085	21.9828	2.1956e-05	0.00123999
YPEL3	CD16+ Monocyte	0.653422	6.65751	21.9804	2.19824e-05	0.00123999
PLAC8	CD16+ Monocyte	1.44003	9.37306	21.8554	2.29882e-05	0.00126627
PARP12	CD16+ Monocyte	1.01953	6.05643	21.8581	2.30096e-05	0.00126627
CNIH4	CD16+ Monocyte	0.992926	7.30655	21.7085	2.42452e-05	0.00132351
RPS23	CD16+ Monocyte	-0.756555	11.1276	21.6447	2.4807e-05	0.00134335
CHP1	CD16+ Monocyte	-0.612982	6.15566	21.572	2.54857e-05	0.00136915
MT-ND5	CD16+ Monocyte	-1.02726	10.5844	21.4233	2.68813e-05	0.00143275
MAIP1	CD16+ Monocyte	0.902366	4.23757	21.3707	2.77291e-05	0.00146639
HELZ2	CD16+ Monocyte	1.31879	5.75976	21.1601	2.96531e-05	0.00155599
SHISA5	CD16+ Monocyte	0.598224	6.6671	21.1138	3.01018e-05	0.00156
TMEM256	CD16+ Monocyte	-0.642472	5.69387	21.1072	3.01907e-05	0.00156
SEC11A	CD16+ Monocyte	-0.543508	8.21845	21.0788	3.04799e-05	0.00156302
HLA-B	CD16+ Monocyte	0.655044	11.8454	20.9868	3.15214e-05	0.00159281
DDX60L	CD16+ Monocyte	1.1029	6.96385	20.987	3.15315e-05	0.00159281
TCN2	CD16+ Monocyte	2.06551	5.48136	20.9609	3.20703e-05	0.00160803
FCGR1B	CD16+ Monocyte	1.90142	5.28877	20.8105	3.37462e-05	0.00167962
IFIT5	CD16+ Monocyte	1.49783	5.21201	20.6021	3.62642e-05	0.00179177
PSMA6	CD16+ Monocyte	0.528841	7.66551	20.4924	3.78045e-05	0.00185434
PTPN9	CD16+ Monocyte	-0.635984	4.67299	20.4751	3.82728e-05	0.0018638
NCOA7	CD16+ Monocyte	1.28331	5.31605	20.4175	3.90853e-05	0.00188977
C14orf119	CD16+ Monocyte	0.632648	5.07139	20.2571	4.13883e-05	0.00197483
CD300E	CD16+ Monocyte	0.974655	8.40231	20.2447	4.14279e-05	0.00197483
RBX1	CD16+ Monocyte	0.50791	8.49541	20.1915	4.22509e-05	0.00199998
SERPINB9P1	CD16+ Monocyte	2.35557	3.34429	19.8299	4.28661e-05	0.002015
EEF2	CD16+ Monocyte	-0.825708	8.61954	20.05	4.45289e-05	0.00205471
LINC02345	CD16+ Monocyte	-1.90804	3.75317	20.0006	4.46214e-05	0.00205471
CRTAM	CD16+ Monocyte	1.38619	4.06895	19.9601	4.63916e-05	0.00210755
RPL4	CD16+ Monocyte	-1.01987	9.16314	19.9213	4.6711e-05	0.00210791
ZNFX1	CD16+ Monocyte	0.778692	5.95757	19.7902	4.91069e-05	0.0021897
CDKN1A	CD16+ Monocyte	1.05633	7.54154	19.7841	4.91703e-05	0.0021897
HAVCR2	CD16+ Monocyte	0.673795	5.86341	19.7639	4.95782e-05	0.00219343
MAVS	CD16+ Monocyte	-0.868063	4.46273	19.5777	5.36048e-05	0.00235617
PAPSS2	CD16+ Monocyte	-1.38777	4.14454	19.5321	5.45981e-05	0.00238435
DYNLT1	CD16+ Monocyte	0.905983	7.3669	19.4023	5.67261e-05	0.0024614
RPL21	CD16+ Monocyte	-0.845499	11.001	19.3636	5.75485e-05	0.00248119
VMO1	CD16+ Monocyte	-1.98668	3.97006	19.3271	5.79172e-05	0.00248127
UBE2L6	CD16+ Monocyte	1.17752	7.75433	19.322	5.84598e-05	0.00248877
LY96	CD16+ Monocyte	0.719331	7.24672	19.2346	6.04185e-05	0.00254389
FCGR1A	CD16+ Monocyte	2.34518	5.83662	19.116	6.32683e-05	0.0026436
RPL5	CD16+ Monocyte	-1.17767	9.79158	19.0893	6.38112e-05	0.00264969
WDFY1	CD16+ Monocyte	0.823469	6.25525	19.0752	6.41969e-05	0.00264969
VRK2	CD16+ Monocyte	0.716235	5.36742	18.9004	6.86859e-05	0.00277721
GBP1	CD16+ Monocyte	1.81887	8.16123	18.8856	6.89276e-05	0.00277721
DSTN	CD16+ Monocyte	-0.527541	6.64928	18.8688	6.9379e-05	0.00277885
LY86	CD16+ Monocyte	0.929952	6.68409	18.826	7.05258e-05	0.00280724
RPL3	CD16+ Monocyte	-1.06566	10.1769	18.7943	7.13496e-05	0.00280724
SPN	CD16+ Monocyte	-0.567097	8.15928	18.7846	7.16165e-05	0.00280724
NT5C3A	CD16+ Monocyte	1.91899	7.10507	18.7626	7.22628e-05	0.00280724
ATL3	CD16+ Monocyte	-0.585856	5.31721	18.7567	7.25151e-05	0.00280724
RPS15A	CD16+ Monocyte	-0.615146	10.9173	18.7494	7.25761e-05	0.00280724
GIMAP4	CD16+ Monocyte	1.01114	8.77697	18.6904	7.42231e-05	0.00284607
EEF1G	CD16+ Monocyte	-0.8753	9.27522	18.6833	7.44207e-05	0.00284607
PWWP2B	CD16+ Monocyte	-0.624496	4.86246	18.6284	7.62445e-05	0.00289943
TAP2	CD16+ Monocyte	0.857897	6.11277	18.5504	7.83335e-05	0.00296167
MT2A	CD16+ Monocyte	1.86258	9.20633	18.5198	7.92002e-05	0.00296167
C2	CD16+ Monocyte	1.76066	5.2725	18.5237	7.95109e-05	0.00296167
AC083862.3	CD16+ Monocyte	1.43848	3.90911	18.521	7.96312e-05	0.00296167
RPS27A	CD16+ Monocyte	-0.769408	10.9364	18.3797	8.35493e-05	0.00307361
ACTG1	CD16+ Monocyte	-0.581489	10.3722	18.3265	8.52665e-05	0.00309945
B2M	CD16+ Monocyte	0.510396	13.7354	18.2936	8.63447e-05	0.00309945
HIST1H1C	CD16+ Monocyte	1.29365	5.60774	18.2932	8.67558e-05	0.00309945
CMTM3	CD16+ Monocyte	-0.79982	5.37149	18.282	8.68616e-05	0.00309945
SMCHD1	CD16+ Monocyte	0.627189	8.30227	18.2741	8.69988e-05	0.00309945
SRGN	CD16+ Monocyte	0.623836	10.846	18.2402	8.81275e-05	0.00311174
SMIM25	CD16+ Monocyte	-0.639819	8.77962	18.2363	8.82633e-05	0.00311174
STAT2	CD16+ Monocyte	0.929914	7.29829	18.2025	8.9429e-05	0.0031365
ASGR1	CD16+ Monocyte	0.758216	6.22014	18.1742	9.04371e-05	0.00315551
SP140	CD16+ Monocyte	1.31768	5.13657	18.1305	9.23379e-05	0.00320119
CHST2	CD16+ Monocyte	-1.10153	5.60842	18.1116	9.26921e-05	0.00320119
ANKRD28	CD16+ Monocyte	1.0706	4.38245	18.067	9.49583e-05	0.0032628
RPL37	CD16+ Monocyte	-0.529019	11.0571	18.0166	9.60239e-05	0.00328275
GPAA1	CD16+ Monocyte	-0.634925	5.08405	17.9953	9.70153e-05	0.00328348
TMEM120B	CD16+ Monocyte	-0.793044	4.59372	17.9401	9.94155e-05	0.00333432
PPM1K	CD16+ Monocyte	1.34558	4.80015	17.9429	9.95027e-05	0.00333432
HERC6	CD16+ Monocyte	2.00053	4.75613	17.8742	0.000100928	0.00336544
SSB	CD16+ Monocyte	0.590204	7.59953	17.8423	0.000102701	0.0033936
FAM168B	CD16+ Monocyte	-0.833317	4.26701	17.8601	0.000102776	0.0033936
KIF22	CD16+ Monocyte	-0.830517	4.72565	17.7268	0.000107762	0.00353154
EEF1A1	CD16+ Monocyte	-0.809423	12.4004	17.7079	0.00010816	0.00353154
PML	CD16+ Monocyte	1.14157	5.69751	17.7032	0.000108518	0.00353154
EVI2A	CD16+ Monocyte	0.7758	7.16849	17.6582	0.000110288	0.00356886
MT-ND2	CD16+ Monocyte	-0.683827	11.7351	17.6474	0.00011072	0.00356886
BTN3A1	CD16+ Monocyte	0.894303	5.55879	17.5982	0.000113098	0.00359412
ABT1	CD16+ Monocyte	0.510027	5.21108	17.5846	0.000113652	0.00359412
OTUD1	CD16+ Monocyte	0.737028	6.96981	17.5689	0.000114158	0.00359412
RPL34	CD16+ Monocyte	-0.58173	11.1871	17.539	0.000115469	0.00361803
RPS7	CD16+ Monocyte	-0.701896	10.415	17.5274	0.000115987	0.00361803
RPS21	CD16+ Monocyte	-0.533349	10.135	17.5011	0.000117176	0.00363838
RHOF	CD16+ Monocyte	-0.60859	5.68636	17.4499	0.000119628	0.00368238
LILRB4	CD16+ Monocyte	0.850135	6.61667	17.4476	0.000119682	0.00368238
BUD31	CD16+ Monocyte	0.519094	7.10306	17.3983	0.000121968	0.00371985
RPS14	CD16+ Monocyte	-0.663648	11.2501	17.3925	0.000122222	0.00371985
TGFBI	CD16+ Monocyte	-0.592613	6.87269	17.3862	0.000122548	0.00371985
MRPS22	CD16+ Monocyte	0.596909	5.7102	17.3488	0.00012443	0.00376012
MT1X	CD16+ Monocyte	1.57752	4.32193	17.2171	0.000127326	0.00383055
GBP4	CD16+ Monocyte	1.24718	7.55146	17.2069	0.000131399	0.00393557
LARP7	CD16+ Monocyte	0.518715	7.07205	17.1724	0.000133183	0.00397143
COPS9	CD16+ Monocyte	-0.513875	6.88035	17.1372	0.000135025	0.0039912
CBR1	CD16+ Monocyte	0.921936	6.0729	17.1167	0.000136172	0.0040076
IMPDH2	CD16+ Monocyte	-0.806309	4.72846	17.1067	0.000137061	0.00401631
XRN1	CD16+ Monocyte	0.682141	6.87279	17.066	0.00013885	0.00403056
RPS4X	CD16+ Monocyte	-0.791095	10.5393	17.0564	0.000139334	0.00403056
LPP	CD16+ Monocyte	-0.585492	6.64664	17.0368	0.000140443	0.00404536
HAUS4	CD16+ Monocyte	-0.773603	4.57868	16.9581	0.00014546	0.00415452
RPL27	CD16+ Monocyte	-0.695491	9.82437	16.8567	0.000150667	0.00428516
CARD6	CD16+ Monocyte	0.63581	5.22112	16.8451	0.000151916	0.00430258
TAP1	CD16+ Monocyte	1.11481	6.88569	16.7418	0.000157668	0.00444191
HLA-A	CD16+ Monocyte	0.905053	11.2507	16.7293	0.000158401	0.00444191
RPS8	CD16+ Monocyte	-0.759816	10.9132	16.7076	0.000159761	0.00444191
RPS6	CD16+ Monocyte	-0.85452	10.5892	16.7004	0.000160209	0.00444191
ETV7	CD16+ Monocyte	3.38008	4.00307	16.5258	0.000160367	0.00444191
DDB2	CD16+ Monocyte	1.20609	5.46387	16.6938	0.000161024	0.00444191
STAT1	CD16+ Monocyte	1.26308	8.01196	16.6559	0.000163054	0.00446847
P2RX7	CD16+ Monocyte	0.892317	5.73463	16.6082	0.000166367	0.00452264
CD14	CD16+ Monocyte	1.19981	7.55083	16.4717	0.000175358	0.00471386
RFTN1	CD16+ Monocyte	-0.519619	5.46048	16.472	0.00017549	0.00471386
PRPF8	CD16+ Monocyte	-0.598362	5.8228	16.3958	0.000180784	0.00483688
MAP3K7CL	CD16+ Monocyte	2.416	4.93634	16.3532	0.000184195	0.00487037
LYRM4	CD16+ Monocyte	-0.896907	4.17433	16.328	0.000186968	0.00492447
RAB37	CD16+ Monocyte	-0.959414	4.76717	16.2849	0.000189564	0.00496502
TESC	CD16+ Monocyte	-0.884971	6.88084	16.2694	0.000189975	0.00496502
PLBD1	CD16+ Monocyte	0.986401	6.93068	16.243	0.00019199	0.00499286
RPS24	CD16+ Monocyte	-0.559015	11.4294	16.2355	0.000192515	0.00499286
HIST1H2BD	CD16+ Monocyte	1.7957	3.47067	15.8438	0.000199708	0.00514002
RPL37A	CD16+ Monocyte	-0.563698	10.6197	16.0966	0.000203435	0.00519641
RNF213	CD16+ Monocyte	0.648327	8.88985	16.0717	0.000205466	0.00522858
HIST1H1E	CD16+ Monocyte	0.876136	5.81211	16.0603	0.000207259	0.00525445
C1GALT1	CD16+ Monocyte	0.566487	6.41733	15.9585	0.000215019	0.00541864
ST8SIA4	CD16+ Monocyte	0.521192	6.77207	15.9047	0.000219651	0.0054864
RPL6	CD16+ Monocyte	-0.837585	10.4963	15.8499	0.000224462	0.00558598
FAM8A1	CD16+ Monocyte	0.904971	4.36608	15.7961	0.000230843	0.00570284
MARCKS	CD16+ Monocyte	0.681501	9.87659	15.7542	0.000233216	0.00574051
TLR1	CD16+ Monocyte	0.571257	6.44089	15.7375	0.000234873	0.00576034
RPL22L1	CD16+ Monocyte	-0.552491	6.98444	15.7068	0.000237715	0.00580899
RPL15	CD16+ Monocyte	-0.668742	10.8017	15.676	0.000240637	0.00585926
QARS	CD16+ Monocyte	-0.781286	5.45352	15.6363	0.000244736	0.00591782
TOR1B	CD16+ Monocyte	1.27732	4.97443	15.6451	0.000244791	0.00591782
SAMD4A	CD16+ Monocyte	1.19853	5.98744	15.6188	0.000246388	0.00593522
BTN3A3	CD16+ Monocyte	0.773296	5.09497	15.5694	0.000251838	0.00603499
ATF3	CD16+ Monocyte	1.11648	6.30776	15.5218	0.000256212	0.0061067
RPL23A	CD16+ Monocyte	-0.599551	10.5394	15.4993	0.000258326	0.00613546
APOL6	CD16+ Monocyte	1.05365	7.49562	15.4554	0.000262967	0.00622387
RPL12	CD16+ Monocyte	-0.595176	10.7799	15.4425	0.0002643	0.00622548
LENG1	CD16+ Monocyte	0.531899	5.24512	15.4373	0.000265335	0.00622548
ZBTB4	CD16+ Monocyte	-0.715793	5.05666	15.4338	0.000265795	0.00622548
AC104809.2	CD16+ Monocyte	-1.37192	4.47172	15.3993	0.000270501	0.00631387
ZFP36L1	CD16+ Monocyte	0.727559	9.04962	15.3694	0.000272207	0.00631886
RTP4	CD16+ Monocyte	1.38706	4.62531	15.3733	0.000272582	0.00631886
TRIM5	CD16+ Monocyte	0.986275	5.05508	15.3206	0.000278763	0.00638905
RNF213-AS1	CD16+ Monocyte	1.25169	3.81471	15.2634	0.000280268	0.00638905
MAPK9	CD16+ Monocyte	-0.663891	4.39814	15.3096	0.000280329	0.00638905
ADM	CD16+ Monocyte	2.02544	5.56336	15.2948	0.000281456	0.00639321
TDRD7	CD16+ Monocyte	0.943431	4.69599	15.262	0.000285283	0.00645846
SESN3	CD16+ Monocyte	-0.843508	5.64378	15.2307	0.000288161	0.00648027
GPD2	CD16+ Monocyte	1.33607	4.56545	15.2115	0.000290323	0.00650727
GPR65	CD16+ Monocyte	0.707117	7.12764	15.1957	0.000292018	0.00651849
BRCA2	CD16+ Monocyte	1.27869	4.18241	15.1804	0.000293712	0.00651849
RPL8	CD16+ Monocyte	-0.571571	10.8252	15.1255	0.00030039	0.00662326
BACH1	CD16+ Monocyte	0.579779	7.89929	15.0869	0.000305143	0.00668681
PFKL	CD16+ Monocyte	-0.551464	6.35292	15.0866	0.000305248	0.00668681
MFNG	CD16+ Monocyte	-0.536949	5.75207	15.0127	0.000314621	0.00684781
BARD1	CD16+ Monocyte	0.824864	4.11685	15.0199	0.000315907	0.00685377
RPS10	CD16+ Monocyte	-0.627264	8.74374	14.9577	0.00032155	0.00693236
RAB11FIP4	CD16+ Monocyte	0.699116	5.23376	14.9625	0.000321578	0.00693236
GOSR1	CD16+ Monocyte	0.595426	5.29559	14.8721	0.000333397	0.00712338
CXCL10	CD16+ Monocyte	4.901	7.09445	14.807	0.000335022	0.00712338
UBE2G2	CD16+ Monocyte	-0.558207	5.64055	14.8371	0.000337964	0.00714899
MAST3	CD16+ Monocyte	-0.519244	5.57001	14.7384	0.000351874	0.00742004
PSME2	CD16+ Monocyte	0.650367	9.14096	14.6729	0.000361098	0.00754406
ESYT1	CD16+ Monocyte	-0.527762	5.26507	14.6563	0.000364	0.00757292
LIMD1	CD16+ Monocyte	-0.580463	5.50037	14.6203	0.000369308	0.00762818
PSMB9	CD16+ Monocyte	0.762101	9.01707	14.6158	0.000369632	0.00762818
CXorf21	CD16+ Monocyte	0.633352	5.49561	14.6019	0.00037206	0.00765493
GBP5	CD16+ Monocyte	2.02577	6.86024	14.5881	0.000374033	0.00766695
APOBEC3B	CD16+ Monocyte	2.46463	3.5968	14.4173	0.000374909	0.00766695
FAS	CD16+ Monocyte	1.00939	5.04968	14.5231	0.000385069	0.00782743
MIA3	CD16+ Monocyte	0.534388	6.28913	14.492	0.000389001	0.00788368
ADGRE3	CD16+ Monocyte	-1.26396	4.15684	14.477	0.000393692	0.00795494
MAPKAPK5	CD16+ Monocyte	-0.626378	4.44123	14.4199	0.000402478	0.00806027
RPL10	CD16+ Monocyte	-0.707618	11.9347	14.3843	0.000406402	0.00811486
DDB1	CD16+ Monocyte	-0.506072	5.13753	14.3574	0.000411603	0.00818524
TIMP1	CD16+ Monocyte	0.837458	9.70663	14.3041	0.000420033	0.00831346
COA6	CD16+ Monocyte	0.572899	5.94153	14.2523	0.000429315	0.0084724
PHF11	CD16+ Monocyte	0.648072	6.40984	14.2129	0.000436254	0.00856503
TPT1	CD16+ Monocyte	-0.550693	11.8727	14.2104	0.000436539	0.00856503
VCAN	CD16+ Monocyte	1.02153	7.88616	14.1975	0.000438957	0.00857651
LPAR6	CD16+ Monocyte	0.75336	7.15522	14.1937	0.000439659	0.00857651
LAP3	CD16+ Monocyte	1.28019	8.0216	14.1853	0.000441117	0.00858023
SNHG29	CD16+ Monocyte	-0.762091	7.54686	14.1323	0.00045087	0.00871982
GPR18	CD16+ Monocyte	1.71086	3.63286	13.9657	0.000456587	0.00880523
RPS3A	CD16+ Monocyte	-0.922428	10.737	14.0406	0.000468244	0.00895351
PSMA4	CD16+ Monocyte	0.508928	8.3892	14.0117	0.000473888	0.00901052
CTSL	CD16+ Monocyte	0.997209	7.78289	13.996	0.000476999	0.00901509
OIP5-AS1	CD16+ Monocyte	-0.618784	6.02155	13.9854	0.000479229	0.00901509
TMEM140	CD16+ Monocyte	1.48731	4.30415	13.9251	0.00048893	0.00914245
SIPA1L1	CD16+ Monocyte	0.590267	6.09438	13.9163	0.000493145	0.00919586
NOP16	CD16+ Monocyte	0.77883	3.68402	13.8376	0.000512564	0.00953172
BRI3BP	CD16+ Monocyte	-0.580302	4.88302	13.8081	0.000516682	0.00958198
CLEC2B	CD16+ Monocyte	0.512349	8.07885	13.7508	0.00052803	0.00973906
NAGK	CD16+ Monocyte	0.702662	8.01985	13.7098	0.000537123	0.00982644
FBL	CD16+ Monocyte	-0.688911	5.55204	13.6688	0.000546678	0.00994185
RPL22	CD16+ Monocyte	-0.683305	9.76763	13.6623	0.000547837	0.00994185
FMNL2	CD16+ Monocyte	1.12441	5.18611	13.6299	0.000556453	0.0100443
IRF9	CD16+ Monocyte	0.593841	7.1496	13.6124	0.000559399	0.0100492
AHNAK	CD16+ Monocyte	-0.766322	8.93604	13.5894	0.000564735	0.0100863
GBP3	CD16+ Monocyte	0.892152	4.95169	13.5722	0.000570885	0.0101426
RPS2	CD16+ Monocyte	-0.71634	11.4091	13.4938	0.000587728	0.0103873
SELL	CD16+ Monocyte	1.42091	7.17939	13.4396	0.000601393	0.0105189
RPL27A	CD16+ Monocyte	-0.61081	10.6152	13.4145	0.000607544	0.0105991
TNNT1	CD16+ Monocyte	2.6107	4.49819	13.3873	0.000610709	0.0105997
SHFL	CD16+ Monocyte	0.881492	5.70874	13.3731	0.000618696	0.0106836
SMDT1	CD16+ Monocyte	-0.556522	7.05272	13.3273	0.000630227	0.010855
MAP4K2	CD16+ Monocyte	-0.52294	5.17566	13.2981	0.000638679	0.0108897
RPL18	CD16+ Monocyte	-0.551525	10.5348	13.2774	0.000643478	0.010944
NAPA	CD16+ Monocyte	0.720359	6.54072	13.2489	0.000651386	0.0110507
GIMAP5	CD16+ Monocyte	1.24235	5.10638	13.2146	0.000662606	0.011213
MLLT1	CD16+ Monocyte	-0.52455	4.77699	13.1825	0.000671137	0.011329
TPGS2	CD16+ Monocyte	-0.621732	4.75188	13.1596	0.000677794	0.0113626
GRN	CD16+ Monocyte	0.52328	8.72135	13.1526	0.000678161	0.0113626
NOP53	CD16+ Monocyte	-0.551396	7.91255	13.0725	0.000701433	0.0116658
RPL26	CD16+ Monocyte	-0.535527	11.4876	13.0151	0.000718609	0.0118353
STK32C	CD16+ Monocyte	-0.931246	4.7865	13.0015	0.000724365	0.0118353
RPL9	CD16+ Monocyte	-0.678698	10.5697	12.9388	0.000742118	0.012034
GIMAP7	CD16+ Monocyte	0.942501	8.12924	12.9336	0.00074382	0.012034
NFIL3	CD16+ Monocyte	0.947787	5.92273	12.9312	0.000744901	0.012034
SLC31A2	CD16+ Monocyte	0.628303	7.83285	12.9131	0.000750266	0.0120628
NAP1L1	CD16+ Monocyte	-0.758428	9.87353	12.8534	0.000769432	0.0121912
YJU2	CD16+ Monocyte	0.653367	4.54104	12.8479	0.000773625	0.0121912
STAC3	CD16+ Monocyte	0.724889	5.63041	12.6279	0.000847521	0.0132352
IGFLR1	CD16+ Monocyte	0.738909	6.31382	12.6221	0.000848992	0.0132352
TRAFD1	CD16+ Monocyte	0.685947	5.39144	12.6213	0.000850544	0.0132352
AMFR	CD16+ Monocyte	-0.618963	4.72325	12.5595	0.000873904	0.0135365
CPSF6	CD16+ Monocyte	-0.506099	5.12031	12.5184	0.000888087	0.0136624
TUFM	CD16+ Monocyte	-0.54837	6.69768	12.5087	0.000890881	0.0136743
RPS18	CD16+ Monocyte	-0.66226	11.2518	12.5021	0.000893296	0.0136804
SPOP	CD16+ Monocyte	0.507219	6.08599	12.4737	0.00090452	0.013821
IP6K1	CD16+ Monocyte	-0.508437	4.63945	12.3942	0.000937789	0.0142502
CD84	CD16+ Monocyte	0.648673	5.13684	12.351	0.000954842	0.0144271
LINC01146	CD16+ Monocyte	1.35685	3.61437	12.3117	0.000957863	0.0144405
ITGB1BP1	CD16+ Monocyte	-0.551233	5.75388	12.2724	0.00098588	0.0147642
ZNF684	CD16+ Monocyte	1.10796	3.44084	12.2266	0.000996409	0.0148561
EXOSC6	CD16+ Monocyte	-0.668277	5.35072	12.1845	0.00102407	0.0151684
ADGRE1	CD16+ Monocyte	-1.06559	5.76796	12.1526	0.00103792	0.0152855
RAE1	CD16+ Monocyte	-0.676974	4.54364	12.156	0.00103875	0.0152855
RPL10A	CD16+ Monocyte	-0.929589	9.96837	12.1293	0.00104784	0.0153857
OAS1	CD16+ Monocyte	0.901533	8.31064	11.8891	0.00116217	0.0167022
STX17	CD16+ Monocyte	0.633541	5.03466	11.8573	0.00118096	0.0169005
CASP7	CD16+ Monocyte	0.77682	5.16391	11.7997	0.0012096	0.017143
CUL1	CD16+ Monocyte	0.826948	5.83344	11.7962	0.00121057	0.017143
H1FX	CD16+ Monocyte	0.520218	7.76048	11.7846	0.0012159	0.0171606
ZNF766	CD16+ Monocyte	0.658752	4.49223	11.7746	0.00122561	0.0172478
RPL7A	CD16+ Monocyte	-0.684829	10.5284	11.7427	0.00123812	0.0173876
TRIM34	CD16+ Monocyte	0.658413	4.84107	11.7292	0.00124896	0.0175035
SMCO4	CD16+ Monocyte	0.510491	7.24848	11.6862	0.00126888	0.0177139
RPS3	CD16+ Monocyte	-0.542874	10.5138	11.6855	0.0012692	0.0177139
AQP9	CD16+ Monocyte	1.73149	5.93698	11.6354	0.00129835	0.018031
CERK	CD16+ Monocyte	-0.5754	6.01015	11.6311	0.00129991	0.018031
VASH1	CD16+ Monocyte	-1.31749	4.69688	11.6195	0.00130888	0.0180812
RAPH1	CD16+ Monocyte	-1.19196	3.86628	11.6197	0.00131184	0.0180852
SIL1	CD16+ Monocyte	0.568322	5.05227	11.5893	0.00132498	0.0181275
PARP10	CD16+ Monocyte	0.787299	4.66243	11.592	0.00132562	0.0181275
RBM43	CD16+ Monocyte	0.799664	4.40982	11.5868	0.00132833	0.0181279
DSE	CD16+ Monocyte	0.562723	5.6294	11.5614	0.00134094	0.0182633
PRKDC	CD16+ Monocyte	-0.731565	6.07242	11.5074	0.00137177	0.018571
TREM1	CD16+ Monocyte	1.00948	6.32859	11.4226	0.00142363	0.0190823
RPL13A	CD16+ Monocyte	-0.629524	10.8254	11.3897	0.00144357	0.0193114
AP5B1	CD16+ Monocyte	0.587841	5.96935	11.3848	0.00144718	0.0193215
MILR1	CD16+ Monocyte	0.878652	4.31586	11.3829	0.00145378	0.0193713
RPL36A	CD16+ Monocyte	-0.519557	10.262	11.3564	0.00146478	0.0194414
KCNJ2	CD16+ Monocyte	1.02042	4.08301	11.3362	0.00147814	0.0195802
EXOSC9	CD16+ Monocyte	0.595684	5.00054	11.3314	0.0014838	0.0196168
MLKL	CD16+ Monocyte	0.827449	5.31616	11.317	0.00149248	0.0196574
EIF3F	CD16+ Monocyte	-0.635944	7.65907	11.3133	0.00149267	0.0196574
APOBEC3G	CD16+ Monocyte	0.514489	6.80418	11.2956	0.00150441	0.0197736
TYMP	CD16+ Monocyte	0.60004	10.4137	11.2844	0.00151159	0.0198293
EIF3E	CD16+ Monocyte	-0.609121	8.09331	11.2715	0.00152021	0.0199038
RPS13	CD16+ Monocyte	-0.592311	10.7426	11.2512	0.00153374	0.0199407
U62317.4	CD16+ Monocyte	1.01682	4.26496	11.26	0.00153481	0.0199407
MBD3	CD16+ Monocyte	-0.625253	4.12311	11.2362	0.0015504	0.0201047
SLAMF7	CD16+ Monocyte	1.36199	6.30413	11.2126	0.00156083	0.0202012
LIPN	CD16+ Monocyte	0.896451	4.21066	11.1894	0.00158167	0.0204007
RPLP2	CD16+ Monocyte	-0.524972	10.5809	11.1668	0.00159159	0.0204818
MKKS	CD16+ Monocyte	-0.625008	3.93619	11.1653	0.0016001	0.0205139
RPP30	CD16+ Monocyte	0.506941	4.99897	11.1523	0.00160387	0.0205229
RPL17	CD16+ Monocyte	-0.631657	10.7256	11.1262	0.0016202	0.0206927
CD63	CD16+ Monocyte	0.980949	8.57157	11.1088	0.00163262	0.0207625
ICAM4	CD16+ Monocyte	-0.901826	5.33575	11.1073	0.00163487	0.0207625
GIMAP6	CD16+ Monocyte	0.806972	5.67583	11.0854	0.00165126	0.0209315
CYSTM1	CD16+ Monocyte	0.743051	5.63294	11.0368	0.00168687	0.0213429
REC8	CD16+ Monocyte	0.97961	4.48525	11.0372	0.00169051	0.021349
PDHX	CD16+ Monocyte	0.618707	4.11039	10.9716	0.00174184	0.0218349
ACP2	CD16+ Monocyte	0.87639	5.41255	10.9615	0.00174362	0.0218349
SLC27A3	CD16+ Monocyte	0.601107	6.02774	10.9595	0.00174403	0.0218349
DUSP6	CD16+ Monocyte	0.514835	9.10378	10.9574	0.00174512	0.0218349
MAPKAPK5-AS1	CD16+ Monocyte	-0.564986	4.61821	10.9393	0.0017623	0.0220092
FLT3LG	CD16+ Monocyte	0.675569	4.1549	10.9113	0.00178857	0.0222377
RPL13	CD16+ Monocyte	-0.638934	11.5381	10.8988	0.00179083	0.0222377
PNPT1	CD16+ Monocyte	1.03341	5.40346	10.899	0.00179373	0.0222377
RACK1	CD16+ Monocyte	-0.566307	10.0324	10.8836	0.00180286	0.0222999
ST14	CD16+ Monocyte	1.64703	3.19102	10.7713	0.00181778	0.0223719
NDUFAF8	CD16+ Monocyte	-0.554645	5.29361	10.7931	0.00187757	0.0229825
RGL1	CD16+ Monocyte	1.53872	3.70705	10.589	0.001983	0.0240703
IFI30	CD16+ Monocyte	0.530191	11.3462	10.6631	0.00198776	0.0240703
IL1RN	CD16+ Monocyte	1.58117	5.05589	10.6644	0.00198778	0.0240703
RPL7	CD16+ Monocyte	-0.713526	9.83695	10.606	0.00203879	0.0246439
GIMAP8	CD16+ Monocyte	0.583257	6.45154	10.5734	0.00206938	0.0247462
EXOSC3	CD16+ Monocyte	0.574589	4.61962	10.5754	0.00207244	0.0247462
APOL2	CD16+ Monocyte	0.700117	5.3358	10.518	0.00212211	0.0251128
ZMAT5	CD16+ Monocyte	0.515707	4.76813	10.485	0.00215445	0.0253263
RGL4	CD16+ Monocyte	-0.863399	4.41193	10.4304	0.00221062	0.0257917
PABPC1	CD16+ Monocyte	-0.667176	9.72998	10.4175	0.00221733	0.0257917
PCBD1	CD16+ Monocyte	-0.600162	4.42898	10.4191	0.00222106	0.0257917
CLEC4A	CD16+ Monocyte	0.518214	6.46731	10.4138	0.00222139	0.0257917
RIPK2	CD16+ Monocyte	0.531913	6.09669	10.3984	0.00223681	0.0259145
GABPB2	CD16+ Monocyte	-0.649957	4.57551	10.4011	0.00223962	0.0259145
FKBP4	CD16+ Monocyte	-0.676386	4.85965	10.3573	0.0022812	0.0262681
CD244	CD16+ Monocyte	-0.76934	4.8658	10.3562	0.00228182	0.0262681
ATP7A	CD16+ Monocyte	-0.564742	4.51828	10.3524	0.00228934	0.0263099
PRR5	CD16+ Monocyte	-1.24418	4.32509	10.3056	0.00233481	0.0267417
TRIB1	CD16+ Monocyte	0.68312	6.11739	10.2728	0.00236606	0.0270082
MCTP1	CD16+ Monocyte	-0.523662	6.07087	10.2563	0.00238358	0.0271474
XIST	CD16+ Monocyte	-0.675041	7.75691	11.4269	0.0024286	0.0274444
DYSF	CD16+ Monocyte	1.70856	3.3515	10.1046	0.00248668	0.0279143
ELK3	CD16+ Monocyte	0.512409	4.87152	10.1207	0.00253838	0.0283554
CRKL	CD16+ Monocyte	-0.504151	4.38979	10.1226	0.00253854	0.0283554
UPK3A	CD16+ Monocyte	1.22156	4.98431	10.1128	0.00254679	0.0284007
TENT5A	CD16+ Monocyte	0.510876	6.95233	10.0944	0.00256292	0.0285336
SOCS3	CD16+ Monocyte	1.41018	6.34545	10.0894	0.00256933	0.028558
PCNT	CD16+ Monocyte	-0.619575	4.4775	10.0727	0.00259463	0.0287093
IGFBP7	CD16+ Monocyte	0.781104	5.09921	10.0392	0.00263067	0.0289256
RPS5	CD16+ Monocyte	-0.570478	9.49671	10.0177	0.00265266	0.0290547
NEDD9	CD16+ Monocyte	-0.531318	6.15254	9.9139	0.00278031	0.0302571
TMUB1	CD16+ Monocyte	0.541377	4.41753	9.89779	0.0028076	0.0304561
STOM	CD16+ Monocyte	0.841843	4.93319	9.83959	0.00287801	0.0309664
RPL18A	CD16+ Monocyte	-0.525597	11.073	9.82416	0.0028949	0.0310545
NIBAN1	CD16+ Monocyte	0.734364	5.69027	9.8198	0.00290491	0.0310545
GNG2	CD16+ Monocyte	-0.558353	6.70722	9.81392	0.00290864	0.0310545
BLVRA	CD16+ Monocyte	0.517341	7.46275	9.80684	0.00291781	0.0310926
ARHGAP25	CD16+ Monocyte	0.512925	6.25151	9.80458	0.00292139	0.0310926
CLN8	CD16+ Monocyte	-0.506705	4.68475	9.7503	0.00299848	0.0317136
NR2C2	CD16+ Monocyte	-0.513577	4.4046	9.73728	0.00302003	0.0318421
ODF2	CD16+ Monocyte	-0.551564	4.18992	9.67573	0.00310703	0.0325793
RPS17	CD16+ Monocyte	-0.577547	9.00061	9.66594	0.00311023	0.0325793
GADD45B	CD16+ Monocyte	0.682785	7.36299	9.6542	0.003127	0.0326142
ITFG2	CD16+ Monocyte	-0.746905	4.15778	9.63607	0.00316299	0.0328379
MRPS18A	CD16+ Monocyte	0.593592	4.50286	9.62228	0.00318118	0.0329761
KCNMA1	CD16+ Monocyte	2.54492	4.20857	9.5877	0.00319476	0.0329798
INTS3	CD16+ Monocyte	-0.509826	4.33008	9.60613	0.00320617	0.0330329
LIX1L	CD16+ Monocyte	-0.571457	4.22446	9.54822	0.00329177	0.0337218
TLR7	CD16+ Monocyte	1.07747	5.16875	9.49979	0.00335958	0.0343002
GOLIM4	CD16+ Monocyte	-0.54249	4.46569	9.44115	0.0034553	0.0351185
HPS5	CD16+ Monocyte	0.545831	4.91893	9.40834	0.00350286	0.035442
MT-ATP8	CD16+ Monocyte	-0.811592	6.88815	9.40184	0.00350837	0.035442
USP30-AS1	CD16+ Monocyte	1.10142	3.74544	9.40053	0.00351641	0.035442
JAML	CD16+ Monocyte	0.508956	8.04693	9.36965	0.00356015	0.0358078
STXBP2	CD16+ Monocyte	0.547803	9.19395	9.36543	0.00356696	0.0358231
TICAM2	CD16+ Monocyte	0.530603	4.97401	9.35266	0.00359388	0.0359866
FCHO2	CD16+ Monocyte	-0.573719	4.71422	9.3194	0.00365026	0.0364434
CKB	CD16+ Monocyte	-1.00858	6.63758	9.26971	0.00372742	0.0371433
RPLP0	CD16+ Monocyte	-0.753157	9.02116	9.2671	0.00373134	0.0371433
HSDL2	CD16+ Monocyte	0.551154	4.80643	9.2514	0.00376527	0.0373711
CREB5	CD16+ Monocyte	1.08566	4.72246	9.23484	0.00379417	0.0376028
VPS13D	CD16+ Monocyte	-0.526342	4.7624	9.22384	0.00381438	0.037646
PIM1	CD16+ Monocyte	0.808251	5.98435	9.21943	0.00381521	0.037646
MRPL10	CD16+ Monocyte	0.506406	4.43891	9.20615	0.00384583	0.0378378
NOD2	CD16+ Monocyte	0.57458	4.77347	9.19567	0.00386225	0.0379442
NLRC5	CD16+ Monocyte	0.615578	5.299	9.18374	0.0038797	0.0380604
PABPC4	CD16+ Monocyte	-0.535787	6.80746	9.11159	0.00400809	0.0390371
NDUFAF1	CD16+ Monocyte	0.680873	4.05538	8.99277	0.00424955	0.0410184
CX3CR1	CD16+ Monocyte	0.520011	8.61015	8.98241	0.00425394	0.0410184
C16orf91	CD16+ Monocyte	0.53322	4.09554	8.97946	0.00427278	0.041057
BST2	CD16+ Monocyte	0.562298	8.46422	8.97155	0.00427534	0.041057
ADRB2	CD16+ Monocyte	0.687357	5.00038	8.96251	0.00429835	0.0410647
NCF4	CD16+ Monocyte	0.645494	6.19794	8.95759	0.00430378	0.0410647
MARCO	CD16+ Monocyte	1.67328	5.96157	8.94066	0.00433963	0.0412257
MFN2	CD16+ Monocyte	-0.530235	4.587	8.93912	0.00434853	0.0412257
SPTLC2	CD16+ Monocyte	0.574714	6.88318	8.90977	0.0043996	0.0415354
CD1D	CD16+ Monocyte	0.605804	5.3131	8.87174	0.00448159	0.0420638
SLC25A5	CD16+ Monocyte	-0.563374	8.32424	8.86432	0.00449286	0.0420638
ZBED4	CD16+ Monocyte	-0.540265	3.98128	8.848	0.00454382	0.0424236
RPL23	CD16+ Monocyte	-0.642615	9.65093	8.83556	0.00455311	0.0424518
RAB30-DT	CD16+ Monocyte	0.504597	4.5678	8.80127	0.0046345	0.0430328
PARP11	CD16+ Monocyte	0.769061	4.32095	8.77789	0.00468733	0.0434638
STXBP5	CD16+ Monocyte	-0.590655	4.44943	8.76313	0.00471938	0.0436124
CSRNP1	CD16+ Monocyte	0.529815	6.212	8.75617	0.00472484	0.0436124
SLC25A6	CD16+ Monocyte	-0.696419	9.31306	8.75299	0.00473104	0.0436124
MRPS6	CD16+ Monocyte	-0.506858	5.58589	8.71251	0.00482223	0.0441591
MCRIP2	CD16+ Monocyte	-0.545329	5.45038	8.67861	0.0048993	0.0446344
ATP2B1-AS1	CD16+ Monocyte	0.642354	8.11046	8.66585	0.00492689	0.0447618
ZNF350	CD16+ Monocyte	0.547115	4.62083	8.6615	0.00494662	0.0447618
RPSA	CD16+ Monocyte	-0.515076	9.49199	8.65345	0.00495534	0.0447618
TIMM23	CD16+ Monocyte	0.526236	4.21019	8.64493	0.00498821	0.0447883
DMWD	CD16+ Monocyte	-0.953209	3.37335	8.63935	0.00498898	0.0447883
UBA7	CD16+ Monocyte	0.582416	4.81036	8.62795	0.0050207	0.0449087
CMTR1	CD16+ Monocyte	0.735731	4.4257	8.57141	0.00516147	0.0457303
PDE3B	CD16+ Monocyte	-0.640809	4.43426	8.5583	0.00519107	0.0458022
IVD	CD16+ Monocyte	-0.684119	5.12934	8.54972	0.00520496	0.0458022
GTPBP2	CD16+ Monocyte	0.608556	4.26158	8.53178	0.00525769	0.0461599
DNASE2	CD16+ Monocyte	0.567675	6.26548	8.49306	0.00534155	0.0467144
HSP90AB1	CD16+ Monocyte	-0.573628	8.76097	8.47898	0.00537605	0.0469554
MDM2	CD16+ Monocyte	0.683467	6.70955	8.45336	0.00544159	0.0473748
DENND1B	CD16+ Monocyte	0.551095	4.76641	8.38266	0.00563242	0.0486299
INSIG1	CD16+ Monocyte	-0.504971	6.6488	8.3767	0.00564044	0.0486371
FAM53B	CD16+ Monocyte	-0.509113	5.25581	8.36026	0.00568696	0.0489759
TCTN3	CD16+ Monocyte	-0.604156	4.08195	8.35325	0.00571978	0.0491959
H2AFJ	CD16+ Monocyte	0.570686	6.62174	8.33404	0.00575477	0.0493714
PHF23	CD16+ Monocyte	0.555186	4.41554	8.32765	0.00578046	0.0494664
MSRB1	CD16+ Monocyte	0.538477	6.4274	8.30781	0.00582635	0.0497739
XAF1	CD56dim NK	2.29209	8.85132	62.6691	7.78066e-11	3.1963e-07
MX1	CD56dim NK	3.30193	7.89205	49.3772	2.48661e-09	3.91914e-06
IFI44L	CD56dim NK	5.17292	7.77991	48.9327	2.86208e-09	3.91914e-06
IRF7	CD56dim NK	2.26904	7.28775	45.6799	7.04765e-09	7.23794e-06
EIF2AK2	CD56dim NK	1.90687	7.79853	41.402	2.47112e-08	2.03027e-05
HERC6	CD56dim NK	2.24576	5.44047	39.1987	4.88492e-08	3.34454e-05
OAS2	CD56dim NK	1.784	6.75327	37.2937	8.7142e-08	5.00246e-05
RSAD2	CD56dim NK	3.89882	5.98441	36.8902	1.00503e-07	5.00246e-05
SHISA5	CD56dim NK	0.746131	7.40693	36.5626	1.09596e-07	5.00246e-05
IFIT1	CD56dim NK	5.1827	5.94191	35.5192	1.38223e-07	5.4857e-05
EEF1G	CD56dim NK	-0.546572	9.22055	35.6395	1.46891e-07	5.4857e-05
OAS1	CD56dim NK	2.65229	6.52954	34.3395	2.23676e-07	6.91306e-05
SP100	CD56dim NK	1.02686	8.79419	34.1996	2.33512e-07	6.91306e-05
DDX60	CD56dim NK	1.23118	6.2861	34.1759	2.35596e-07	6.91306e-05
IRF9	CD56dim NK	0.957381	7.76033	32.63	3.90522e-07	0.000106951
DDX58	CD56dim NK	0.976899	6.07767	31.6448	5.42484e-07	0.000131095
MT-CO3	CD56dim NK	-0.721425	13.3241	31.6406	5.42505e-07	0.000131095
EPSTI1	CD56dim NK	1.67246	7.38299	30.8682	7.03489e-07	0.000160552
IFIT3	CD56dim NK	3.44679	6.53353	30.3196	8.50471e-07	0.000183152
N4BP1	CD56dim NK	0.747786	6.76856	30.154	8.96384e-07	0.000183152
TRIM25	CD56dim NK	0.927071	5.22478	30.0407	9.36268e-07	0.000183152
IFI6	CD56dim NK	2.92681	8.40569	29.4416	1.14324e-06	0.000213474
ADAR	CD56dim NK	0.826814	8.00866	29.1995	1.24241e-06	0.000221905
SAMD9	CD56dim NK	0.940454	8.28743	28.7547	1.44873e-06	0.00024264
OASL	CD56dim NK	2.37552	5.54854	28.7169	1.47663e-06	0.00024264
LGALS9	CD56dim NK	1.28624	6.26457	28.2306	1.73974e-06	0.000259151
TYMP	CD56dim NK	1.85413	7.00485	27.9296	1.93155e-06	0.000261214
IFI44	CD56dim NK	2.55176	5.9731	27.932	1.94361e-06	0.000261214
HERC5	CD56dim NK	1.9388	5.67429	27.8777	1.97118e-06	0.000261214
USP18	CD56dim NK	2.13685	5.23521	26.7965	2.90404e-06	0.000372806
MX2	CD56dim NK	2.71784	6.19865	26.6378	3.05346e-06	0.000380109
SAMD9L	CD56dim NK	1.05803	7.91737	26.4531	3.25312e-06	0.000393053
SP110	CD56dim NK	0.812002	7.7427	25.4301	4.69679e-06	0.000523855
MT-CO1	CD56dim NK	-0.645475	13.6567	25.3703	4.79886e-06	0.000523855
ISG15	CD56dim NK	2.29942	9.48458	25.2717	4.97331e-06	0.000523855
HELZ2	CD56dim NK	1.32424	5.74152	24.9202	5.65838e-06	0.000566942
IFI16	CD56dim NK	0.681127	9.08006	24.4661	6.66855e-06	0.000652247
IFIH1	CD56dim NK	1.28928	5.23652	24.2646	7.2103e-06	0.000681984
DTX3L	CD56dim NK	0.961721	6.69797	24.2189	7.3046e-06	0.000681984
TMEM123	CD56dim NK	0.989528	7.04265	24.136	7.52908e-06	0.000687321
OAS3	CD56dim NK	3.00562	4.86066	23.6642	9.02992e-06	0.000773311
MT-ATP6	CD56dim NK	-0.657169	13.4863	23.5693	9.278e-06	0.000773311
PALM2-AKAP2	CD56dim NK	1.04118	6.19395	23.5434	9.37616e-06	0.000773311
DDX60L	CD56dim NK	1.11506	6.31544	23.4815	9.59208e-06	0.000773311
IFI35	CD56dim NK	1.16305	7.3281	23.4139	9.83089e-06	0.00077664
CNP	CD56dim NK	0.711076	5.33919	23.0165	1.14223e-05	0.000885334
MT-CYB	CD56dim NK	-0.87939	12.3531	22.2304	1.53077e-05	0.00114989
LAP3	CD56dim NK	0.956127	6.5335	22.2164	1.53953e-05	0.00114989
LY6E	CD56dim NK	1.0823	9.71658	22.1214	1.59514e-05	0.00117015
PLSCR1	CD56dim NK	1.47924	6.95896	21.973	1.68786e-05	0.00121644
EIF3L	CD56dim NK	-0.526717	6.40592	21.7945	1.80656e-05	0.00127954
CHMP5	CD56dim NK	0.745865	6.7494	21.7478	1.83834e-05	0.00127998
H1FX	CD56dim NK	0.626784	8.30169	21.6538	1.90471e-05	0.00130409
TRIM22	CD56dim NK	0.960886	7.89631	21.3806	2.11388e-05	0.00142358
MT-CO2	CD56dim NK	-0.5285	13.4879	21.2039	2.26148e-05	0.00147463
CMPK2	CD56dim NK	2.96843	5.07866	21.1693	2.30772e-05	0.00148127
NMI	CD56dim NK	0.695445	6.82135	20.7456	2.69771e-05	0.00167912
PHF11	CD56dim NK	0.681245	6.99228	20.3579	3.13372e-05	0.00192139
ZCCHC2	CD56dim NK	0.828046	5.79161	19.7734	3.93713e-05	0.00237849
IFIT5	CD56dim NK	1.19478	5.14377	19.6817	4.099e-05	0.00244039
PARP14	CD56dim NK	0.884808	7.63257	19.3097	4.71902e-05	0.00273038
TRIM38	CD56dim NK	0.509526	7.00454	19.1811	4.96469e-05	0.00283263
PARP9	CD56dim NK	1.31526	6.86005	18.9141	5.51777e-05	0.00305392
SHFL	CD56dim NK	0.653688	6.98902	18.8875	5.57556e-05	0.00305392
TRIM14	CD56dim NK	0.653818	5.59557	18.6083	6.23583e-05	0.00328421
MT-ND1	CD56dim NK	-0.516004	11.8304	18.4244	6.70159e-05	0.00348483
AC009950.1	CD56dim NK	1.04699	4.97082	18.0791	7.71818e-05	0.00391436
ISG20	CD56dim NK	1.35854	8.72411	16.9109	0.000123468	0.00576863
MT-ND4	CD56dim NK	-0.579367	12.3272	16.9087	0.000123573	0.00576863
BST2	CD56dim NK	0.900013	8.92239	16.6884	0.000135236	0.00617278
AZI2	CD56dim NK	0.665678	5.5579	16.0251	0.000177918	0.00753494
PIM1	CD56dim NK	0.530742	7.1571	15.579	0.000214016	0.00888057
PARP12	CD56dim NK	0.909684	5.3681	15.5455	0.000217313	0.0089272
ZBP1	CD56dim NK	0.659874	6.74633	14.6821	0.00031211	0.0123284
TAP2	CD56dim NK	0.589787	6.44417	13.6852	0.000477969	0.0181805
MYD88	CD56dim NK	0.543641	5.62048	13.011	0.000640639	0.0232898
SCO2	CD56dim NK	0.803157	5.18029	12.5686	0.000778204	0.0270921
IFIT2	CD56dim NK	1.10534	5.4821	12.178	0.000924363	0.0310868
STAT2	CD56dim NK	0.90415	6.04137	11.9934	0.0010028	0.0324371
PARP10	CD56dim NK	0.540197	5.94727	11.9594	0.0010181	0.0326745
NR4A2	CD56dim NK	-0.682409	7.96563	11.6085	0.00119059	0.0370689
SNX18	CD56dim NK	0.56322	5.52997	11.5481	0.00122406	0.0370689
UBE2L6	CD56dim NK	0.685202	7.4145	11.431	0.00128928	0.0383793
STAT1	CD56dim NK	1.0537	7.34837	11.142	0.0014688	0.0416126
TAP1	CD56dim NK	0.522173	7.48903	11.1207	0.00148297	0.0417264
IFI44L	CD56bright NK	4.42754	8.09074	41.2119	4.19724e-08	0.000113036
IRF7	CD56bright NK	2.10857	6.56778	40.9153	4.7236e-08	0.000113036
XAF1	CD56bright NK	2.28302	8.39831	37.051	1.44832e-07	0.000231056
MX1	CD56bright NK	2.99406	7.22393	33.4301	4.37555e-07	0.000523534
MX2	CD56bright NK	2.73426	5.91735	30.8741	9.50027e-07	0.000909366
ISG15	CD56bright NK	2.01511	8.89275	28.1312	2.40732e-06	0.00164592
EPSTI1	CD56bright NK	1.70508	7.05853	26.8909	3.66386e-06	0.00196742
RSAD2	CD56bright NK	3.11559	5.24913	25.942	3.69971e-06	0.00196742
LGALS9	CD56bright NK	1.43925	5.82721	26.1327	4.78318e-06	0.00228923
MT-CO3	CD56bright NK	-0.560112	13.6408	25.3632	6.1742e-06	0.00268634
IFI6	CD56bright NK	2.34131	7.30839	24.047	9.82295e-06	0.00391772
C12orf75	CD56bright NK	-0.776354	7.0365	20.7129	3.28411e-05	0.0105778
EIF2AK2	CD56bright NK	1.37334	7.37196	20.5814	3.45001e-05	0.0105778
OAS1	CD56bright NK	2.54623	5.63998	20.4037	3.53626e-05	0.0105778
LY6E	CD56bright NK	0.91251	9.27152	20.0715	4.17049e-05	0.0117412
ADAR	CD56bright NK	0.76918	7.63755	19.4479	5.27999e-05	0.0140389
MPC2	CD56bright NK	-0.732855	6.60945	18.8893	6.54165e-05	0.0164781
HAVCR2	CD56bright NK	0.956565	5.62846	18.4521	7.79626e-05	0.0186565
SP100	CD56bright NK	0.76816	8.49725	17.5788	0.000108499	0.0225804
PRKCQ-AS1	CD56bright NK	-0.807258	5.7023	17.5974	0.000108514	0.0225804
TYMP	CD56bright NK	1.53432	6.32849	17.2931	0.000121955	0.023449
ISG20	CD56bright NK	1.08584	8.52852	17.2263	0.000124606	0.023449
IFI44	CD56bright NK	1.93229	6.01243	17.1664	0.000127387	0.023449
CAPN2	CD56bright NK	0.952518	6.09887	16.8625	0.000144372	0.0255913
OAS2	CD56bright NK	1.4822	6.22502	16.3526	0.000176859	0.0300965
SP110	CD56bright NK	0.803335	7.46928	16.2681	0.000182365	0.0300965
OASL	CD56bright NK	1.90496	5.06763	16.1209	0.000189136	0.0301734
TIMP1	CD56bright NK	1.0188	5.57816	15.8131	0.000220254	0.0319754
SAMD9	CD56bright NK	0.757508	7.34948	15.7597	0.000223785	0.0319754
OAS3	CD56bright NK	1.90848	5.16491	15.6734	0.000227155	0.0319754
MT-ATP6	CD56bright NK	-0.509408	13.4095	15.3935	0.000259476	0.0354815
IFI35	CD56bright NK	1.05456	6.65436	15.0096	0.000303889	0.0404003
CEBPB	CD56bright NK	0.992572	5.90464	14.8361	0.000327241	0.0423291
CAPN2	Naive CD8+ T	0.90663	4.94	40.8818	3.23826e-08	8.08377e-05
IFI44L	Naive CD8+ T	4.31647	7.70728	40.5517	3.57215e-08	8.08377e-05
XAF1	Naive CD8+ T	2.50263	7.74519	36.2835	1.31783e-07	0.000198816
OAS1	Naive CD8+ T	3.5856	4.85893	34.4543	2.3615e-07	0.000213495
IFIT3	Naive CD8+ T	5.52349	4.56719	34.0769	2.49583e-07	0.000213495
MX1	Naive CD8+ T	2.72752	7.092	33.877	2.83025e-07	0.000213495
IFIT1	Naive CD8+ T	4.52102	4.89676	32.3015	4.74834e-07	0.00030231
RSAD2	Naive CD8+ T	3.25175	5.29393	31.9321	5.34353e-07	0.00030231
HERC6	Naive CD8+ T	1.97956	4.52858	30.5372	8.48996e-07	0.000422194
IRF7	Naive CD8+ T	2.20099	5.98836	30.2536	9.32819e-07	0.000422194
SP100	Naive CD8+ T	0.9329	7.7182	29.0788	1.38891e-06	0.000523852
IFI44	Naive CD8+ T	2.44566	5.43711	28.7263	1.56763e-06	0.000545777
SP110	Naive CD8+ T	0.646879	7.44443	28.2295	1.85904e-06	0.000601001
HELZ2	Naive CD8+ T	1.84255	4.05078	27.2551	2.61021e-06	0.00072464
EIF2AK2	Naive CD8+ T	1.71229	6.83535	27.2504	2.61211e-06	0.00072464
LY6E	Naive CD8+ T	1.32087	7.91252	27.1327	2.7218e-06	0.00072464
ADAR	Naive CD8+ T	0.725077	7.09028	26.9024	2.95065e-06	0.000741925
USP18	Naive CD8+ T	2.34016	4.11697	26.5533	3.34184e-06	0.000796062
EPSTI1	Naive CD8+ T	2.01288	5.9394	26.0411	3.99979e-06	0.000905152
SAMD9	Naive CD8+ T	0.957172	6.73097	25.6613	4.57851e-06	0.000986778
OAS2	Naive CD8+ T	1.58093	5.8122	25.4511	4.93625e-06	0.00101552
TRIM25	Naive CD8+ T	0.981186	4.15454	25.1815	5.4401e-06	0.00106563
BISPR	Naive CD8+ T	1.60315	3.95408	24.8956	6.031e-06	0.00106563
HERC5	Naive CD8+ T	2.71812	3.78751	24.763	6.34357e-06	0.00106563
IFI6	Naive CD8+ T	2.18544	7.06418	24.5723	6.77277e-06	0.00106563
IFI16	Naive CD8+ T	0.91459	7.30137	24.5561	6.81261e-06	0.00106563
CMPK2	Naive CD8+ T	2.95597	3.84481	24.5632	6.82793e-06	0.00106563
SAMD9L	Naive CD8+ T	1.49977	6.29648	24.1	8.04121e-06	0.00117402
EEF1B2	Naive CD8+ T	-0.52019	11.1775	23.9762	8.41227e-06	0.00118981
PARP9	Naive CD8+ T	1.69742	5.60029	23.8768	8.7247e-06	0.00119661
HSH2D	Naive CD8+ T	1.49272	4.09629	23.7604	9.1096e-06	0.00121265
IFIT5	Naive CD8+ T	1.60629	3.83549	23.1257	1.1518e-05	0.00145833
DDX60	Naive CD8+ T	1.5989	5.91749	23.1019	1.15997e-05	0.00145833
PARP12	Naive CD8+ T	0.938132	4.26405	22.7316	1.33107e-05	0.00162822
PLSCR1	Naive CD8+ T	1.92567	5.21269	22.6276	1.38328e-05	0.00164756
ISG15	Naive CD8+ T	2.0201	8.6536	20.67	2.89485e-05	0.00297774
IRF9	Naive CD8+ T	0.838091	6.52321	20.5814	2.99486e-05	0.00301217
EIF3L	Naive CD8+ T	-0.56209	7.38903	20.2231	3.43699e-05	0.00317465
PLP2	Naive CD8+ T	0.560546	5.37559	19.8907	3.90813e-05	0.00353764
CNP	Naive CD8+ T	0.775618	4.26851	19.2756	4.96587e-05	0.00424066
EEF1G	Naive CD8+ T	-0.523836	10.9091	19.1663	5.18114e-05	0.00434256
LAP3	Naive CD8+ T	0.901062	5.47344	18.9994	5.53181e-05	0.00447307
CHMP5	Naive CD8+ T	0.74024	5.86607	18.9981	5.53452e-05	0.00447307
MX2	Naive CD8+ T	1.47805	6.06992	18.4835	6.77892e-05	0.00487051
PHF11	Naive CD8+ T	0.622842	6.13087	17.8101	8.86088e-05	0.00572919
BST2	Naive CD8+ T	1.21552	6.78464	17.2873	0.000109302	0.00652716
IFIH1	Naive CD8+ T	1.0991	4.48872	17.1789	0.000114221	0.00662775
DTX3L	Naive CD8+ T	1.04096	5.22171	16.9863	0.000123455	0.00689821
PPM1K	Naive CD8+ T	0.563269	6.45196	16.6617	0.000140842	0.00765507
TRIM22	Naive CD8+ T	0.909004	6.53664	16.5535	0.000147197	0.0078378
NCF1	Naive CD8+ T	-0.552778	5.37551	15.5824	0.000219483	0.0105679
IFI35	Naive CD8+ T	1.09994	5.50946	15.5163	0.000225579	0.0106824
ZCCHC2	Naive CD8+ T	0.731492	5.02065	14.9025	0.000291443	0.0125626
TIAM1	Naive CD8+ T	-0.504455	4.45913	14.8598	0.000296767	0.0126544
AC009950.1	Naive CD8+ T	0.767738	4.63036	14.8182	0.00030196	0.0126544
NT5C3A	Naive CD8+ T	0.615626	5.38374	13.5585	0.000515638	0.0182326
PIM1	Naive CD8+ T	0.714209	6.65278	12.9327	0.000675728	0.0215376
STAT2	Naive CD8+ T	0.771577	4.96552	12.3726	0.000863132	0.0258711
DDX60L	Naive CD8+ T	0.776425	5.35098	12.1628	0.000946594	0.0276405
NMI	Naive CD8+ T	0.581299	5.95226	12.1234	0.000963174	0.0279444
SHFL	Naive CD8+ T	0.583056	5.74986	11.839	0.00109238	0.0305193
AC114760.2	Naive CD8+ T	0.504824	5.36728	11.7092	0.00115728	0.0319382
BCL11A	Naive CD8+ T	-0.577145	4.52115	11.2741	0.00140594	0.0363146
TRIM69	Naive CD8+ T	0.61089	4.18417	11.1259	0.0015027	0.0371677
C20orf204	Naive CD8+ T	3.2788	4.38145	10.956	0.00162323	0.0392666
UBE2L6	Naive CD8+ T	0.707659	6.41596	10.8136	0.00173011	0.0407837
PARP14	Naive CD8+ T	0.800685	5.82367	10.5378	0.0019611	0.0443798
IFI44L	GZMKhi CD8+ T	5.84	7.117	65.5968	4.46148e-10	2.36548e-06
HERC6	GZMKhi CD8+ T	2.37958	5.10478	39.6872	2.30025e-07	0.000609797
IFI44	GZMKhi CD8+ T	2.96661	5.73328	34.8797	7.61051e-07	0.0010583
HSH2D	GZMKhi CD8+ T	2.0441	5.03707	34.8092	7.98415e-07	0.0010583
XAF1	GZMKhi CD8+ T	1.84246	8.00601	31.3733	2.03678e-06	0.00194386
LGALS9	GZMKhi CD8+ T	1.37498	6.16837	31.1147	2.19976e-06	0.00194386
IRF7	GZMKhi CD8+ T	1.82016	6.59075	29.8351	3.17014e-06	0.00240116
RSAD2	GZMKhi CD8+ T	3.51074	5.44596	27.9257	4.08928e-06	0.0024731
MX1	GZMKhi CD8+ T	2.45921	7.94531	28.8526	4.19802e-06	0.0024731
GZMB	GZMKhi CD8+ T	4.74536	7.6378	27.6398	5.19497e-06	0.00275437
IFI6	GZMKhi CD8+ T	2.2542	7.75231	27.7892	5.74838e-06	0.00277072
BST2	GZMKhi CD8+ T	1.35238	7.52096	27.1607	6.93103e-06	0.00306236
MX2	GZMKhi CD8+ T	1.84121	6.27293	25.4325	1.18138e-05	0.00481822
EIF2AK2	GZMKhi CD8+ T	1.58015	7.05157	24.6299	1.50864e-05	0.00571344
IFITM2	GZMKhi CD8+ T	1.04071	8.34452	23.7772	1.9731e-05	0.00658761
DDX60	GZMKhi CD8+ T	1.73986	6.23494	23.7662	1.98796e-05	0.00658761
IFITM1	GZMKhi CD8+ T	1.60023	8.86801	23.4198	2.21428e-05	0.00690594
SP100	GZMKhi CD8+ T	0.819285	8.50109	22.6289	2.85481e-05	0.00840901
NCOA1	GZMKhi CD8+ T	-0.672272	6.38133	22.3785	3.10339e-05	0.0086601
LY6E	GZMKhi CD8+ T	1.39976	8.45798	21.1843	4.59486e-05	0.0117717
SAMD9L	GZMKhi CD8+ T	1.14972	7.27331	21.1418	4.66249e-05	0.0117717
EEF1G	GZMKhi CD8+ T	-0.621701	10.1565	20.0529	6.72981e-05	0.0162188
ADAR	GZMKhi CD8+ T	0.662362	7.50692	19.3755	8.49457e-05	0.0188811
OASL	GZMKhi CD8+ T	2.12974	5.43811	19.1216	8.54669e-05	0.0188811
DCAF13	GZMKhi CD8+ T	0.694422	5.66001	18.8871	0.000101145	0.0214508
EPSTI1	GZMKhi CD8+ T	1.37788	7.19656	18.4018	0.000119353	0.0227746
RPL3	GZMKhi CD8+ T	-0.586912	11.8134	18.3803	0.000120183	0.0227746
OAS1	GZMKhi CD8+ T	2.05902	6.20443	18.2796	0.000125196	0.0227746
SAMD9	GZMKhi CD8+ T	0.909269	7.53467	18.2501	0.000125878	0.0227746
USP18	GZMKhi CD8+ T	2.19766	5.21997	18.1616	0.000128864	0.0227746
N4BP1	GZMKhi CD8+ T	0.614951	6.84436	17.6787	0.000154282	0.0252616
ISG15	GZMKhi CD8+ T	1.82546	9.63767	17.6328	0.000156734	0.0252616
TYMP	GZMKhi CD8+ T	1.67775	6.04103	17.5781	0.000160698	0.0252616
PLSCR1	GZMKhi CD8+ T	1.61544	6.10822	17.553	0.000161994	0.0252616
HMOX2	GZMKhi CD8+ T	0.519248	6.77685	17.4038	0.000170297	0.0257975
RFTN1	GZMKhi CD8+ T	-0.738207	5.64169	17.1912	0.000185211	0.0272774
AZI2	GZMKhi CD8+ T	0.841004	5.53959	16.79	0.000213695	0.030622
HIST1H3D	GZMKhi CD8+ T	-0.889544	5.41692	16.249	0.000233405	0.0321112
CD81	GZMKhi CD8+ T	-0.554758	8.23368	16.5005	0.000236201	0.0321112
TPT1	GZMKhi CD8+ T	-0.502287	12.7573	16.3923	0.000245731	0.0325717
TRIM22	GZMKhi CD8+ T	0.810226	7.17142	16.1542	0.000268354	0.0339154
IFI16	GZMKhi CD8+ T	0.726895	8.47713	16.0972	0.000273977	0.0339154
RPS4X	GZMKhi CD8+ T	-0.546843	12.0261	16.0863	0.000275059	0.0339154
RPL5	GZMKhi CD8+ T	-0.520737	11.1722	15.9643	0.00028776	0.0346751
TPI1	GZMKhi CD8+ T	0.555527	7.3009	15.5899	0.000330896	0.0389869
PARP9	GZMKhi CD8+ T	1.46781	6.18185	15.1486	0.000391285	0.0432207
IFIT1	GZMKhi CD8+ T	2.6488	5.65594	14.9337	0.000408859	0.0436808
EEF1B2	GZMKhi CD8+ T	-0.557922	10.2646	14.7222	0.000458901	0.0477077
IFI44L	CD8- γδ T	8.13788	7.16219	85.7902	5.6944e-13	1.50799e-09
MX1	CD8- γδ T	4.32276	7.16749	88.3343	8.43161e-13	1.50799e-09
LY6E	CD8- γδ T	1.90848	7.76529	66.9833	7.68507e-11	9.16317e-08
SAMD9L	CD8- γδ T	2.224	6.36866	56.3218	8.95538e-10	8.00835e-07
PARP9	CD8- γδ T	2.66843	6.00797	52.3442	2.04916e-09	1.46597e-06
XAF1	CD8- γδ T	3.08507	7.77665	50.0358	4.28889e-09	2.20131e-06
ISG15	CD8- γδ T	2.88138	8.65798	49.976	4.30785e-09	2.20131e-06
BST2	CD8- γδ T	1.62509	7.05766	47.1399	9.05994e-09	4.05093e-06
IFI16	CD8- γδ T	1.247	7.45873	46.5567	1.05309e-08	4.18545e-06
IRF7	CD8- γδ T	2.67853	6.07151	43.5357	2.22274e-08	7.95074e-06
EIF2AK2	CD8- γδ T	2.47363	6.93488	38.2123	1.0857e-07	3.3595e-05
IFI35	CD8- γδ T	2.0156	5.6185	38.0333	1.12703e-07	3.3595e-05
IFI6	CD8- γδ T	2.68889	7.05232	37.4496	1.35771e-07	3.7358e-05
ADAR	CD8- γδ T	1.09282	7.50104	37.1408	1.47735e-07	3.77463e-05
OAS2	CD8- γδ T	2.26874	5.96973	35.2677	2.39831e-07	5.71918e-05
PLSCR1	CD8- γδ T	2.27263	5.60265	34.9965	2.55896e-07	5.72087e-05
EPSTI1	CD8- γδ T	2.76224	6.23129	32.5098	5.80084e-07	0.000122056
SP100	CD8- γδ T	1.19485	7.82309	32.3889	6.28447e-07	0.000124886
MX2	CD8- γδ T	2.04915	5.8452	32.1545	6.75758e-07	0.00012722
DDX60	CD8- γδ T	2.60031	5.88618	31.5985	7.60353e-07	0.000135989
SP110	CD8- γδ T	0.839372	7.51248	28.3848	2.28533e-06	0.000389268
NMI	CD8- γδ T	1.0721	6.2211	28.2264	2.42775e-06	0.000394729
TRIM22	CD8- γδ T	1.01317	6.85285	26.2852	4.64209e-06	0.000721946
EEF1G	CD8- γδ T	-0.561106	10.6464	24.9558	7.30482e-06	0.00108872
SAMD9	CD8- γδ T	1.20375	7.34082	22.7137	1.61582e-05	0.002223
MT-CO3	CD8- γδ T	-0.551584	13.2017	22.3211	1.85812e-05	0.00237375
TRANK1	CD8- γδ T	1.3911	5.46986	20.9565	2.98561e-05	0.0036826
LGALS3BP	CD8- γδ T	1.41037	5.59469	20.5618	3.55264e-05	0.00423593
RNF213	CD8- γδ T	0.598352	8.43742	19.1142	6.09997e-05	0.00703858
IFITM1	CD8- γδ T	0.843893	8.9194	19.034	6.29898e-05	0.00704108
SHFL	CD8- γδ T	0.998172	6.30906	17.7883	0.000101951	0.0107258
CAPN2	CD8- γδ T	1.11513	5.98944	17.5984	0.000109925	0.0112343
CCDC57	CD8- γδ T	-0.613963	7.12995	17.047	0.000135785	0.0134918
STAT1	CD8- γδ T	1.42886	7.17326	16.3264	0.000180789	0.017018
HMGA1	CD8- γδ T	-0.693838	7.24065	15.7633	0.000226379	0.0194967
MT2A	CD8- γδ T	1.5505	5.88902	15.7462	0.000228924	0.0194967
CHST2	CD8- γδ T	-0.63235	6.88475	15.1853	0.000286207	0.0229873
FBL	CD8- γδ T	-0.571477	7.13906	14.8175	0.000332476	0.0249309
TOX2	CD8- γδ T	-0.841343	6.52108	14.3202	0.000408367	0.0270754
PLP2	CD8- γδ T	0.858035	5.99188	14.2471	0.000422051	0.0274487
EIF3L	CD8- γδ T	-0.520398	7.60023	13.6374	0.000542076	0.0340177
NCF1	CD8- γδ T	-0.734082	6.12189	13.2298	0.000645121	0.0397861
HIST1H4C	CD8- γδ T	-0.596723	7.76597	12.9476	0.000725618	0.0419902
MRPS33	CD8- γδ T	-0.620308	6.03735	12.7561	0.000788727	0.0440825
LAP3	CD8- γδ T	1.01154	5.77085	12.7217	0.000801924	0.0441305
IFI44L	Naive CD4+ T	4.40008	8.05343	43.1499	1.82459e-08	7.05206e-05
XAF1	Naive CD4+ T	2.49324	8.13713	39.011	6.16602e-08	9.94291e-05
OAS1	Naive CD4+ T	3.58815	5.5172	38.2688	7.71765e-08	9.94291e-05
MX1	Naive CD4+ T	2.80731	7.46841	36.3219	1.40223e-07	0.000133648
RSAD2	Naive CD4+ T	3.43478	5.96401	35.11	2.0478e-07	0.000133648
IFIT3	Naive CD4+ T	5.13776	6.20041	35.0695	2.07475e-07	0.000133648
SP110	Naive CD4+ T	0.758775	7.53563	31.9777	5.58878e-07	0.000226853
IRF7	Naive CD4+ T	2.2587	6.29274	31.9598	5.62153e-07	0.000226853
HERC6	Naive CD4+ T	2.25223	4.8064	31.7976	5.92864e-07	0.000226853
IFI44	Naive CD4+ T	2.58912	5.64483	31.7298	6.06128e-07	0.000226853
EIF2AK2	Naive CD4+ T	1.90074	7.10476	30.923	7.90514e-07	0.000226853
IFI16	Naive CD4+ T	1.06651	7.58842	30.7721	8.31033e-07	0.000226853
PARP9	Naive CD4+ T	1.79016	5.93135	30.6445	8.67005e-07	0.000226853
CAPN2	Naive CD4+ T	0.753919	4.95205	30.4829	9.14884e-07	0.000226853
SAMD9L	Naive CD4+ T	1.73301	6.50935	30.3513	9.55812e-07	0.000226853
PALM2-AKAP2	Naive CD4+ T	1.25311	5.02038	29.7772	1.15823e-06	0.000226853
UBALD2	Naive CD4+ T	0.528109	7.93791	29.6863	1.19407e-06	0.000226853
LY6E	Naive CD4+ T	1.57173	7.98642	29.6178	1.22189e-06	0.000226853
OAS2	Naive CD4+ T	1.73692	5.96609	29.592	1.23258e-06	0.000226853
PLSCR1	Naive CD4+ T	2.20666	5.38675	29.3602	1.3328e-06	0.000234148
SP100	Naive CD4+ T	1.03862	7.84581	29.046	1.4821e-06	0.00024702
DDX60	Naive CD4+ T	1.84244	6.08077	28.9448	1.53389e-06	0.00024702
CNP	Naive CD4+ T	1.03786	4.53978	28.6503	1.69559e-06	0.000262138
HELZ2	Naive CD4+ T	2.10671	4.57931	28.3781	1.86057e-06	0.000276581
IFIT1	Naive CD4+ T	3.9865	5.70723	28.0053	2.11412e-06	0.000302633
DTX3L	Naive CD4+ T	1.27123	5.53169	27.6067	2.42484e-06	0.000324823
CMPK2	Naive CD4+ T	2.79243	4.72801	27.5924	2.43722e-06	0.000324823
ADAR	Naive CD4+ T	0.773339	7.18322	27.2746	2.72004e-06	0.000350432
EPSTI1	Naive CD4+ T	2.04962	6.30107	27.1503	2.83996e-06	0.000354079
IFI6	Naive CD4+ T	2.39932	7.4653	25.8302	4.51005e-06	0.000518838
LAP3	Naive CD4+ T	1.10817	5.53974	25.7965	4.56416e-06	0.000518838
USP18	Naive CD4+ T	2.47409	4.53903	25.7031	4.71813e-06	0.000521016
HSH2D	Naive CD4+ T	1.46859	4.40551	24.8307	6.4375e-06	0.000672458
HERC5	Naive CD4+ T	2.64628	4.63858	24.2457	7.94571e-06	0.000808163
EEF1B2	Naive CD4+ T	-0.542626	11.122	23.809	9.30679e-06	0.000899269
SAMD9	Naive CD4+ T	1.05218	6.90901	23.741	9.53978e-06	0.000899298
IFIT5	Naive CD4+ T	1.58093	4.64688	23.5661	1.01681e-05	0.000913945
ISG15	Naive CD4+ T	2.37922	8.68319	23.3947	1.08241e-05	0.000933966
PARP12	Naive CD4+ T	0.99789	4.50687	23.1712	1.17483e-05	0.000987114
RPS14	Naive CD4+ T	-0.518972	12.7159	23.0751	1.21688e-05	0.00100069
PIM1	Naive CD4+ T	0.852119	7.4267	22.8991	1.29825e-05	0.00104536
TRIM22	Naive CD4+ T	1.19219	6.59891	22.5655	1.46833e-05	0.00115602
OAS3	Naive CD4+ T	2.17274	4.46801	22.4758	1.51814e-05	0.00115602
PHF11	Naive CD4+ T	0.71488	6.2861	22.4625	1.5254e-05	0.00115602
EIF3L	Naive CD4+ T	-0.6378	7.36615	22.0989	1.74596e-05	0.00122694
MX2	Naive CD4+ T	1.54342	6.62075	21.0068	2.63088e-05	0.00172345
PLP2	Naive CD4+ T	0.525349	5.00564	20.7566	2.89276e-05	0.00185006
CHMP5	Naive CD4+ T	0.79142	6.02783	20.732	2.91989e-05	0.00185006
IFI35	Naive CD4+ T	1.31463	5.59174	20.5947	3.07642e-05	0.00188736
IRF9	Naive CD4+ T	0.836779	6.88301	20.4382	3.26558e-05	0.00189337
SHISA5	Naive CD4+ T	0.502498	6.27483	20.4323	3.27292e-05	0.00189337
EEF1G	Naive CD4+ T	-0.549422	10.9467	18.8936	5.92977e-05	0.0030971
RPL3	Naive CD4+ T	-0.526242	12.4351	18.6993	6.39835e-05	0.00321164
IFIH1	Naive CD4+ T	1.21365	4.73108	18.5081	6.89741e-05	0.00335573
PNPT1	Naive CD4+ T	0.802698	5.54657	18.4902	6.94589e-05	0.00335573
PPM1K	Naive CD4+ T	0.692149	6.31516	18.0022	8.42175e-05	0.00392169
ZCCHC2	Naive CD4+ T	0.883393	5.18228	17.7292	9.38668e-05	0.00421855
DDX60L	Naive CD4+ T	1.04921	5.51814	17.1379	0.000118914	0.00491595
MYC	Naive CD4+ T	0.575571	7.24116	16.8581	0.000133105	0.00535885
SHFL	Naive CD4+ T	0.726054	5.80091	16.7738	0.000137716	0.00542953
BST2	Naive CD4+ T	1.28449	6.39223	16.7495	0.000139075	0.00542953
DDX58	Naive CD4+ T	0.979048	5.19959	16.4754	0.000155426	0.0059586
AC009950.1	Naive CD4+ T	0.87651	4.76696	16.209	0.00017324	0.00628802
IFITM2	Naive CD4+ T	0.509284	8.39841	15.6689	0.000216184	0.00746028
NMI	Naive CD4+ T	0.688926	6.29447	15.5428	0.00022773	0.00749325
TNFSF10	Naive CD4+ T	0.827522	6.83123	14.9455	0.000291784	0.00887987
STAT2	Naive CD4+ T	0.839996	5.24445	14.8509	0.000303547	0.0090739
NCF1	Naive CD4+ T	-0.521047	5.51303	13.9379	0.000445912	0.0115668
PARP14	Naive CD4+ T	0.922177	5.99796	13.8099	0.000470859	0.0121292
STAT1	Naive CD4+ T	1.16785	7.55661	13.1804	0.000616523	0.0140998
UBE2L6	Naive CD4+ T	0.775486	6.48853	13.1238	0.000631766	0.0141964
SOCS3	Naive CD4+ T	1.12499	7.40808	13.061	0.000649118	0.0143362
LGALS3BP	Naive CD4+ T	0.626408	5.57403	12.7263	0.00075035	0.0153444
CASP1	Naive CD4+ T	0.589448	4.53463	12.3948	0.000867013	0.0170024
NT5C3A	Naive CD4+ T	0.728081	6.07944	11.7835	0.00113445	0.0201131
TRANK1	Naive CD4+ T	0.598487	5.23783	11.7334	0.0011599	0.0204345
CD38	Naive CD4+ T	-0.66074	5.00512	11.612	0.00122407	0.0211207
GBP1	Naive CD4+ T	0.901814	5.98119	11.4407	0.00132097	0.0224915
PARP10	Naive CD4+ T	0.710574	5.2397	11.4031	0.00134328	0.022771
IFITM1	Naive CD4+ T	0.965757	8.76585	11.2738	0.00142311	0.0234784
GPRIN3	Naive CD4+ T	0.571589	5.66664	10.4999	0.00201709	0.0289816
NFKBIZ	Naive CD4+ T	0.524908	6.88682	10.3411	0.00216831	0.0300669
MT2A	Naive CD4+ T	1.13079	7.31411	10.1129	0.00240661	0.0314515
APOL6	Naive CD4+ T	0.625046	6.34912	9.88435	0.00267307	0.033435
MT-CYB	Naive CD4+ T	-0.558242	12.2386	9.81727	0.00275701	0.0340762
TAP1	Naive CD4+ T	0.557601	5.82911	9.02704	0.00398259	0.0433597
IFI44L	CD4+ TCM	4.44842	7.5978	61.9125	1.09565e-10	4.52103e-07
RSAD2	CD4+ TCM	3.27936	4.49966	57.3115	1.8988e-10	4.52103e-07
OAS1	CD4+ TCM	2.88945	5.10088	53.1423	6.84228e-10	1.0861e-06
IFIT1	CD4+ TCM	4.73863	4.56145	48.5589	2.20048e-09	2.61967e-06
IFIT3	CD4+ TCM	4.87135	5.04383	46.7027	2.9628e-09	2.82178e-06
MX1	CD4+ TCM	2.24091	7.03814	44.9242	9.69119e-09	7.69157e-06
USP18	CD4+ TCM	2.7069	4.2328	40.2875	2.69639e-08	1.83431e-05
XAF1	CD4+ TCM	1.92754	7.77099	40.7324	3.28811e-08	1.95725e-05
EEF1B2	CD4+ TCM	-0.600559	10.9811	39.9826	4.11464e-08	2.1771e-05
IFI44	CD4+ TCM	2.38315	5.07318	39.0837	4.80987e-08	2.29046e-05
SAMD9L	CD4+ TCM	1.34071	6.35246	36.2942	1.28585e-07	5.56658e-05
RPS14	CD4+ TCM	-0.527	12.7146	33.0805	3.58159e-07	0.000131196
IRF7	CD4+ TCM	1.89006	6.01097	32.316	4.63012e-07	0.00015749
ISG15	CD4+ TCM	1.78066	8.25658	31.3329	6.37194e-07	0.000202288
RPL3	CD4+ TCM	-0.523571	12.2691	30.6912	7.89458e-07	0.000216982
LY6E	CD4+ TCM	1.241	7.7446	30.6468	8.01537e-07	0.000216982
EIF2AK2	CD4+ TCM	1.59171	6.51738	30.3377	8.90903e-07	0.000216982
IFI6	CD4+ TCM	2.03181	6.45037	30.3375	8.94063e-07	0.000216982
OAS2	CD4+ TCM	1.20133	5.83893	30.2808	9.11305e-07	0.000216982
IFI16	CD4+ TCM	0.682395	7.78341	29.9359	1.01863e-06	0.000230788
DDX60	CD4+ TCM	1.68416	5.3739	29.8106	1.06622e-06	0.000230788
PLSCR1	CD4+ TCM	1.4886	5.00068	29.4961	1.1802e-06	0.000234171
SP100	CD4+ TCM	0.772958	7.91354	28.9185	1.44086e-06	0.000274454
PLAC8	CD4+ TCM	0.537164	9.4597	28.4452	1.69538e-06	0.000310516
SHISA5	CD4+ TCM	0.722331	6.15675	28.242	1.82131e-06	0.000321225
BST2	CD4+ TCM	1.14601	6.3384	28.0601	1.94127e-06	0.000330154
EIF3L	CD4+ TCM	-0.620656	7.37977	26.6908	3.12831e-06	0.000495489
SOCS3	CD4+ TCM	1.44464	7.17622	25.4459	4.87252e-06	0.000682439
SSBP2	CD4+ TCM	-0.855907	5.28319	25.091	5.57334e-06	0.00073723
PARP9	CD4+ TCM	1.21057	5.67444	23.6137	9.51253e-06	0.00113247
UBALD2	CD4+ TCM	0.574985	7.68626	23.4496	1.00692e-05	0.0011695
EEF1G	CD4+ TCM	-0.528137	10.8053	23.2844	1.07009e-05	0.00118506
EPSTI1	CD4+ TCM	1.23732	6.34631	22.6266	1.36752e-05	0.00141568
MX2	CD4+ TCM	1.09845	6.41938	22.5558	1.40424e-05	0.00142277
PIM1	CD4+ TCM	0.881164	7.07446	22.4939	1.43596e-05	0.00142459
LAP3	CD4+ TCM	0.822818	5.64542	21.6041	2.01137e-05	0.00184195
HERC6	CD4+ TCM	1.74899	4.39933	21.0588	2.41659e-05	0.00205497
MYC	CD4+ TCM	0.772648	7.08497	20.9011	2.62237e-05	0.00219083
SAMD9	CD4+ TCM	0.69601	6.79299	20.5104	3.04665e-05	0.00245901
ADAR	CD4+ TCM	0.555522	7.1305	20.13	3.52603e-05	0.00275262
TYMP	CD4+ TCM	1.21606	4.7661	19.948	3.79539e-05	0.00288245
SP110	CD4+ TCM	0.573599	7.49335	19.6477	4.25146e-05	0.00316335
IFIT5	CD4+ TCM	1.31976	4.3071	17.4659	9.86444e-05	0.00579932
TRIM22	CD4+ TCM	0.783667	6.64151	17.4204	0.000102795	0.00589771
IFITM1	CD4+ TCM	0.830687	8.6631	16.46	0.000151794	0.0076898
PHF11	CD4+ TCM	0.563589	6.38335	16.4064	0.000155204	0.00770034
TRIM25	CD4+ TCM	0.921916	4.31691	15.888	0.000192652	0.00917408
YDJC	CD4+ TCM	0.597495	5.12575	15.5799	0.000218874	0.0101192
DIS3	CD4+ TCM	0.587767	5.37979	15.3029	0.000245264	0.0112303
RPS10	CD4+ TCM	-0.520169	10.2711	15.1493	0.000261054	0.0118394
KLRB1	CD4+ TCM	-1.42746	6.46467	15.0185	0.000275971	0.0123564
RPA1	CD4+ TCM	-0.577184	4.99276	14.8262	0.000300012	0.0132283
DDX60L	CD4+ TCM	0.832819	5.19503	14.7778	0.000306024	0.0132481
FBXO25	CD4+ TCM	-0.550986	4.97436	14.7372	0.000311552	0.0133659
TSPOAP1-AS1	CD4+ TCM	-0.734204	4.80459	14.0733	0.00041316	0.0171084
UTP3	CD4+ TCM	0.503479	5.08134	13.9191	0.000440643	0.0180891
PIM2	CD4+ TCM	0.611487	6.58048	13.8741	0.000447907	0.0182302
CAPN2	CD4+ TCM	0.518589	5.67979	13.8101	0.000460688	0.0185915
LY96	CD4+ TCM	0.595781	5.16255	13.6686	0.000490267	0.0194554
PDK1	CD4+ TCM	0.571903	5.94702	13.4773	0.000531371	0.0207409
ZCCHC2	CD4+ TCM	0.704221	5.22877	13.2223	0.000594146	0.0219635
GTF2H3	CD4+ TCM	0.596477	4.66254	13.2247	0.00059474	0.0219635
IFI35	CD4+ TCM	0.812805	5.36718	13.2003	0.000599901	0.0219748
LGALS3BP	CD4+ TCM	0.59016	5.34039	13.1425	0.000614563	0.0220041
CHMP5	CD4+ TCM	0.576516	6.04166	13.0665	0.000634706	0.0225558
ACTG1	CD4+ TCM	-0.513412	10.6667	12.8946	0.000683442	0.0239305
MT-CO3	CD4+ TCM	-0.501819	13.0207	12.5711	0.000787216	0.0269692
DTX3L	CD4+ TCM	0.732469	5.32146	12.3941	0.000852428	0.0285863
B3GNT2	CD4+ TCM	0.692338	4.92256	11.9162	0.00105356	0.0336714
TNFSF10	CD4+ TCM	0.607793	6.56843	11.3321	0.00136415	0.0419052
MT-CYB	CD4+ TCM	-0.558475	12.2004	11.3174	0.00137279	0.0419052
CNP	CD4+ TCM	0.752487	4.64368	11.1912	0.00145644	0.0435156
PMM2	CD4+ TCM	0.618605	4.63537	11.08	0.00153077	0.0444484
PARP12	CD4+ TCM	0.766425	4.45177	10.9299	0.00163791	0.0469864
PARP14	CD4+ TCM	0.594557	6.08919	10.8992	0.00165859	0.0472947
PMAIP1	CD4+ TCM	0.88654	4.68977	10.8527	0.001698	0.0478454
PALM2-AKAP2	CD4+ TCM	0.896609	4.70136	10.6844	0.00183262	0.0498681
TPT1	Merged Memory CD4+ T	-0.59808	13.1463	61.4585	1.01892e-10	5.58062e-07
EEF1G	Merged Memory CD4+ T	-0.825552	10.3807	52.2458	1.10826e-09	2.9023e-06
EEF1B2	Merged Memory CD4+ T	-0.798801	10.479	50.9178	1.58972e-09	2.9023e-06
MX1	Merged Memory CD4+ T	2.87436	8.03843	47.6421	3.95371e-09	4.02649e-06
RPL3	Merged Memory CD4+ T	-0.734428	11.9461	47.4716	4.14275e-09	4.02649e-06
SP100	Merged Memory CD4+ T	1.00605	8.36958	46.5993	5.30758e-09	4.02649e-06
RPS16	Merged Memory CD4+ T	-0.547065	11.7837	46.3364	5.71982e-09	4.02649e-06
IFI44L	Merged Memory CD4+ T	4.02175	7.8499	46.2622	5.8813e-09	4.02649e-06
DDX60	Merged Memory CD4+ T	2.27731	6.0315	44.682	9.28747e-09	4.90964e-06
RPS23	Merged Memory CD4+ T	-0.526819	12.307	44.4949	9.72822e-09	4.90964e-06
IFIT1	Merged Memory CD4+ T	5.06937	6.00997	42.7596	1.15661e-08	4.90964e-06
RPS6	Merged Memory CD4+ T	-0.615402	12.2067	43.9003	1.15722e-08	4.90964e-06
RPS14	Merged Memory CD4+ T	-0.638054	12.3411	43.4709	1.31264e-08	4.90964e-06
EEF1A1	Merged Memory CD4+ T	-0.579276	13.2472	43.3919	1.34353e-08	4.90964e-06
RPL5	Merged Memory CD4+ T	-0.635435	11.4001	43.3891	1.34462e-08	4.90964e-06
RPL4	Merged Memory CD4+ T	-0.642904	10.3415	43.0278	1.49582e-08	5.12039e-06
XAF1	Merged Memory CD4+ T	2.16662	8.21897	42.7197	1.63946e-08	5.28196e-06
RPL13	Merged Memory CD4+ T	-0.562967	13.196	42.0235	2.01565e-08	6.02994e-06
RPS7	Merged Memory CD4+ T	-0.520595	11.8272	41.8993	2.09182e-08	6.02994e-06
IFIT3	Merged Memory CD4+ T	5.37899	6.22132	39.9191	3.00739e-08	7.48703e-06
RPL21	Merged Memory CD4+ T	-0.600504	12.0682	40.1165	3.58208e-08	8.18695e-06
RPS27A	Merged Memory CD4+ T	-0.600239	12.3646	40.1116	3.58749e-08	8.18695e-06
IFI44	Merged Memory CD4+ T	2.45234	6.18232	39.8539	3.90535e-08	8.55584e-06
RSAD2	Merged Memory CD4+ T	4.25395	5.85587	38.8311	4.63394e-08	9.76157e-06
EIF3L	Merged Memory CD4+ T	-0.826507	7.20291	38.7278	5.4881e-08	1.06743e-05
LAP3	Merged Memory CD4+ T	1.31557	6.31331	38.6384	5.65191e-08	1.06743e-05
USP18	Merged Memory CD4+ T	3.03078	5.22311	38.4031	5.89157e-08	1.0756e-05
EEF2	Merged Memory CD4+ T	-0.591385	9.45765	37.9366	7.01279e-08	1.239e-05
PLAC8	Merged Memory CD4+ T	1.17557	8.74442	37.4204	8.2419e-08	1.31002e-05
RPS4X	Merged Memory CD4+ T	-0.586742	12.1782	37.3681	8.3775e-08	1.31002e-05
RPL9	Merged Memory CD4+ T	-0.52757	11.8345	37.304	8.54777e-08	1.31002e-05
PARP9	Merged Memory CD4+ T	1.91556	6.43442	37.2902	8.61068e-08	1.31002e-05
LY6E	Merged Memory CD4+ T	1.58351	8.69129	36.9278	9.62269e-08	1.35449e-05
KRT10	Merged Memory CD4+ T	-0.667672	7.10847	36.766	1.01308e-07	1.35449e-05
HERC6	Merged Memory CD4+ T	2.12912	5.20057	36.6747	1.04169e-07	1.35449e-05
ISG15	Merged Memory CD4+ T	2.69088	9.5301	36.6131	1.06282e-07	1.35449e-05
SNHG29	Merged Memory CD4+ T	-0.614603	9.00198	36.6112	1.06342e-07	1.35449e-05
RPS2	Merged Memory CD4+ T	-0.581607	12.6854	35.8572	1.35121e-07	1.68195e-05
RPS18	Merged Memory CD4+ T	-0.562885	13.0979	35.4305	1.54879e-07	1.88505e-05
RPL6	Merged Memory CD4+ T	-0.503046	11.7448	35.2221	1.65593e-07	1.959e-05
RPL17	Merged Memory CD4+ T	-0.58899	11.9846	35.1752	1.68109e-07	1.959e-05
HERC5	Merged Memory CD4+ T	3.04254	5.36427	34.657	1.95778e-07	2.2339e-05
IFI6	Merged Memory CD4+ T	2.87476	7.70101	34.6324	2.00532e-07	2.23923e-05
RPL13A	Merged Memory CD4+ T	-0.539133	12.3811	34.569	2.04421e-07	2.23923e-05
EIF2AK2	Merged Memory CD4+ T	1.73608	7.26125	34.3984	2.16275e-07	2.32263e-05
EPSTI1	Merged Memory CD4+ T	1.84031	7.28741	34.2867	2.24164e-07	2.3544e-05
OAS1	Merged Memory CD4+ T	2.82851	6.35743	34.2022	2.31875e-07	2.3544e-05
KLRB1	Merged Memory CD4+ T	-1.20374	8.54946	34.1776	2.3213e-07	2.3544e-05
OAS3	Merged Memory CD4+ T	2.72767	5.11561	33.829	2.56886e-07	2.47203e-05
PLSCR1	Merged Memory CD4+ T	2.40444	5.94295	33.8818	2.57268e-07	2.47203e-05
IFI16	Merged Memory CD4+ T	0.84214	8.25725	32.9741	3.44273e-07	3.14264e-05
IRF7	Merged Memory CD4+ T	1.96711	6.59868	32.6068	3.89555e-07	3.4977e-05
OAS2	Merged Memory CD4+ T	1.59742	6.54785	32.1634	4.51616e-07	3.98952e-05
CMPK2	Merged Memory CD4+ T	3.60398	4.77557	31.2066	5.18051e-07	4.43338e-05
SAMD9L	Merged Memory CD4+ T	1.58946	7.18912	31.5061	5.61413e-07	4.73055e-05
RPL10	Merged Memory CD4+ T	-0.50833	13.1692	31.1873	6.24349e-07	5.10382e-05
RPS8	Merged Memory CD4+ T	-0.505693	12.4458	30.4528	8.00441e-07	6.44708e-05
RPS3A	Merged Memory CD4+ T	-0.648409	12.302	30.2172	8.67241e-07	6.78554e-05
SP110	Merged Memory CD4+ T	0.839975	7.5913	29.1691	1.24266e-06	9.19735e-05
IFIT5	Merged Memory CD4+ T	2.04893	4.65114	28.5563	1.46141e-06	0.000106722
RPL27	Merged Memory CD4+ T	-0.569053	10.9657	28.6565	1.4836e-06	0.000106917
MX2	Merged Memory CD4+ T	1.84094	6.92803	28.2224	1.72808e-06	0.000121342
LGALS9	Merged Memory CD4+ T	1.25693	6.10808	28.1453	1.77522e-06	0.000123074
BST2	Merged Memory CD4+ T	1.26732	7.23531	27.5708	2.16957e-06	0.000141461
ADAR	Merged Memory CD4+ T	0.759651	7.44578	27.4345	2.27602e-06	0.000145582
SAMD9	Merged Memory CD4+ T	1.21158	7.26958	27.2012	2.47236e-06	0.000155645
PGAP1	Merged Memory CD4+ T	1.78378	4.51279	26.6371	3.04916e-06	0.000183519
SPATS2L	Merged Memory CD4+ T	2.10768	4.77767	25.7622	4.03563e-06	0.000236194
PI4K2B	Merged Memory CD4+ T	1.11885	4.39276	25.8571	4.05373e-06	0.000236194
SLC2A4RG	Merged Memory CD4+ T	-0.538901	5.95471	25.5839	4.41052e-06	0.000251879
DHX58	Merged Memory CD4+ T	2.02601	4.01209	25.2175	4.8629e-06	0.000274578
ESYT1	Merged Memory CD4+ T	-0.504604	6.25773	24.5999	6.30403e-06	0.000335215
HSH2D	Merged Memory CD4+ T	1.69797	4.85317	24.5214	6.54328e-06	0.000344592
OASL	Merged Memory CD4+ T	2.72359	5.20385	24.2702	7.04208e-06	0.000357618
IFIT2	Merged Memory CD4+ T	2.95076	4.66112	24.0828	7.0518e-06	0.000357618
PHF11	Merged Memory CD4+ T	0.752535	6.77641	24.1409	7.4588e-06	0.000374788
RPL7	Merged Memory CD4+ T	-0.516981	11.0273	24.1096	7.54109e-06	0.000375478
SHFL	Merged Memory CD4+ T	0.952826	6.16094	24.0178	7.80979e-06	0.000385353
DTX3L	Merged Memory CD4+ T	1.11852	5.82981	23.8752	8.24647e-06	0.000403267
RTP4	Merged Memory CD4+ T	1.71831	4.61387	23.5724	8.96562e-06	0.000430743
MT-CYB	Merged Memory CD4+ T	-0.751945	12.2165	23.2955	1.01947e-05	0.000485535
C12orf57	Merged Memory CD4+ T	-0.540344	8.20856	23.1653	1.07027e-05	0.000501013
TRIM22	Merged Memory CD4+ T	1.11422	6.9869	23.0447	1.1202e-05	0.000519942
MT-ND4	Merged Memory CD4+ T	-0.523229	11.8933	22.576	1.33448e-05	0.000609081
PALM2-AKAP2	Merged Memory CD4+ T	1.29584	5.17906	22.5254	1.36687e-05	0.000618706
FBL	Merged Memory CD4+ T	-0.54058	6.61157	21.9429	1.69579e-05	0.00075511
MT-CO3	Merged Memory CD4+ T	-0.586429	13.1197	21.9037	1.72049e-05	0.000759931
CHMP5	Merged Memory CD4+ T	0.858641	6.4957	21.7925	1.79616e-05	0.000780759
TYMP	Merged Memory CD4+ T	1.55596	6.49987	21.3085	2.16073e-05	0.000924554
HELZ2	Merged Memory CD4+ T	1.72476	5.16792	21.2487	2.22366e-05	0.000944107
SAMD1	Merged Memory CD4+ T	-0.77748	4.54295	20.5446	2.92117e-05	0.00120295
RPS10	Merged Memory CD4+ T	-0.565511	9.87526	20.4354	3.022e-05	0.00123519
ABHD14B	Merged Memory CD4+ T	-0.616979	5.56791	20.2152	3.2981e-05	0.00133805
IFIH1	Merged Memory CD4+ T	1.47239	5.46702	20.1553	3.38187e-05	0.00136195
ARL14EP	Merged Memory CD4+ T	0.563387	6.21534	19.729	3.98388e-05	0.00159268
STAT2	Merged Memory CD4+ T	1.07672	5.6709	19.4705	4.4142e-05	0.00175193
LGALS3BP	Merged Memory CD4+ T	0.974637	5.81376	19.4272	4.48533e-05	0.00175472
DDX58	Merged Memory CD4+ T	1.17306	5.75596	19.4106	4.51958e-05	0.00175558
ODF3B	Merged Memory CD4+ T	1.58507	3.75229	18.4409	6.33741e-05	0.00231516
YARS	Merged Memory CD4+ T	0.664713	5.72891	18.553	6.34058e-05	0.00231516
MT-ATP6	Merged Memory CD4+ T	-0.503812	13.0642	18.3096	6.98042e-05	0.00248258
HM13	Merged Memory CD4+ T	0.511776	6.14318	18.2702	7.0959e-05	0.00250737
PPM1K	Merged Memory CD4+ T	0.838017	6.16842	18.163	7.40958e-05	0.00260143
BISPR	Merged Memory CD4+ T	1.42447	4.39911	17.6703	9.07995e-05	0.00306981
NT5C3A	Merged Memory CD4+ T	0.925543	6.73053	17.5953	9.30756e-05	0.00312745
IFI35	Merged Memory CD4+ T	1.27671	6.15938	17.0385	0.000116778	0.00384661
N4BP1	Merged Memory CD4+ T	0.66142	6.70028	16.9798	0.000119528	0.00389674
PIM2	Merged Memory CD4+ T	0.600339	6.50245	16.8829	0.00012438	0.00402169
IFITM2	Merged Memory CD4+ T	0.564659	8.8074	16.862	0.000125397	0.00402169
LINC02273	Merged Memory CD4+ T	-0.90507	5.20586	16.8657	0.000125563	0.00402169
ZBP1	Merged Memory CD4+ T	1.38852	4.77063	16.6826	0.000135051	0.00430043
NCF1	Merged Memory CD4+ T	-0.630732	5.36373	16.6425	0.000137437	0.0043403
SBNO2	Merged Memory CD4+ T	0.870932	4.60474	16.5844	0.00014131	0.00439747
SHISA5	Merged Memory CD4+ T	0.505751	6.61693	16.5493	0.000142596	0.00441241
MRPS18C	Merged Memory CD4+ T	0.517306	6.30743	16.4307	0.000149789	0.00460897
AC009950.1	Merged Memory CD4+ T	1.01604	4.64016	16.4084	0.000151692	0.00464142
DDX60L	Merged Memory CD4+ T	0.982544	5.85618	16.2349	0.000162547	0.00491861
IFITM1	Merged Memory CD4+ T	1.03434	8.98252	15.6065	0.000210743	0.00607493
SOCS3	Merged Memory CD4+ T	0.94311	7.29583	15.5747	0.00021356	0.00612393
ZCCHC2	Merged Memory CD4+ T	0.940873	5.61162	15.3833	0.00023174	0.00650891
MAN2B1	Merged Memory CD4+ T	-0.638101	4.99951	15.0782	0.000263785	0.00725416
SAT1	Merged Memory CD4+ T	0.627439	8.18208	14.9838	0.000273689	0.00743022
PILRB	Merged Memory CD4+ T	0.791857	4.66975	14.9828	0.000275063	0.00743022
TSPOAP1-AS1	Merged Memory CD4+ T	-0.646344	4.8186	14.9726	0.000276	0.00743022
TIFA	Merged Memory CD4+ T	-0.619983	5.08155	14.8567	0.00028949	0.00773433
TNFSF10	Merged Memory CD4+ T	0.625382	7.60679	14.8292	0.000292183	0.00776838
CNP	Merged Memory CD4+ T	0.930857	4.81327	14.7293	0.000305802	0.0080523
FRMD4B	Merged Memory CD4+ T	1.06241	4.56218	14.6184	0.000321139	0.00841569
RASSF1	Merged Memory CD4+ T	-0.538296	4.83445	14.3727	0.000356036	0.00915147
PARP14	Merged Memory CD4+ T	0.878086	6.75177	14.3543	0.000357571	0.00915147
QARS	Merged Memory CD4+ T	-0.612973	5.47988	14.2912	0.000367614	0.00936475
SLFN12L	Merged Memory CD4+ T	0.709669	4.86933	14.2226	0.000379357	0.00961916
TXNDC11	Merged Memory CD4+ T	0.608957	4.55635	14.0968	0.000400477	0.0101079
MT2A	Merged Memory CD4+ T	1.02666	8.57142	13.2534	0.000574352	0.0140434
PNPT1	Merged Memory CD4+ T	0.78458	5.53499	13.0669	0.000623801	0.0151847
AC010642.2	Merged Memory CD4+ T	-0.820598	4.57723	12.9983	0.000645075	0.0156331
NMI	Merged Memory CD4+ T	0.617723	6.73181	12.7009	0.000731379	0.017341
GTPBP10	Merged Memory CD4+ T	0.636794	4.51847	12.6248	0.000758675	0.0178337
CISH	Merged Memory CD4+ T	1.18368	4.66218	12.1997	0.000890731	0.020498
MRPS18A	Merged Memory CD4+ T	0.594492	4.76222	12.1573	0.00093214	0.0213612
CASP1	Merged Memory CD4+ T	0.638278	5.60283	12.1064	0.000951663	0.0217177
SSBP2	Merged Memory CD4+ T	-0.641495	4.72423	12.0801	0.000965071	0.0219323
PARP10	Merged Memory CD4+ T	0.63262	5.40588	12.0122	0.000992801	0.0224693
AKT3	Merged Memory CD4+ T	-0.579469	4.83231	11.9961	0.00100167	0.0225767
TNFSF12	Merged Memory CD4+ T	-0.529214	5.3603	11.9284	0.00103029	0.0230322
AL121933.2	Merged Memory CD4+ T	0.826983	4.28471	11.3724	0.00132648	0.028716
GBP1	Merged Memory CD4+ T	0.903585	6.79437	11.2294	0.00140871	0.0297208
PARP12	Merged Memory CD4+ T	0.80087	5.20971	11.229	0.00141088	0.0297208
HIST1H1E	Merged Memory CD4+ T	0.511464	6.26733	11.1704	0.00144816	0.0302732
CERK	Merged Memory CD4+ T	-0.600839	5.39953	11.0253	0.00154648	0.0319626
ZSCAN16-AS1	Merged Memory CD4+ T	-0.514314	5.11346	11.0071	0.00156014	0.0320847
TRIM21	Merged Memory CD4+ T	0.782297	4.58474	10.9892	0.0015711	0.0321078
ISG20	Merged Memory CD4+ T	0.566561	8.62038	10.5906	0.00188347	0.0376488
AC092683.1	Merged Memory CD4+ T	0.62029	4.87834	10.573	0.00190326	0.0377702
SAMD4B	Merged Memory CD4+ T	-0.613551	4.55309	10.519	0.00195097	0.038437
UBE2L6	Merged Memory CD4+ T	0.64676	7.07549	10.3975	0.00205798	0.03997
STAT1	Merged Memory CD4+ T	0.906109	7.72889	10.3217	0.00213089	0.04124
IRF9	Merged Memory CD4+ T	0.532449	6.83048	10.2038	0.00225011	0.042643
ZNFX1	Merged Memory CD4+ T	0.615987	5.59262	10.0856	0.00237779	0.0445998
BCL2L13	Merged Memory CD4+ T	0.53892	4.5455	9.90629	0.00258886	0.0479027
LINC00892	Merged Memory CD4+ T	-0.784493	5.30983	9.88742	0.00260783	0.0480913
IFIT3	Naive Treg	6.30432	6.35656	48.7597	1.75899e-09	3.34673e-06
IFI44L	Naive Treg	5.04499	7.64066	50.9369	1.77593e-09	3.34673e-06
TPT1	Naive Treg	-0.555987	13.304	47.761	4.18222e-09	5.25427e-06
XAF1	Naive Treg	2.4309	8.09632	44.5533	1.03988e-08	9.79825e-06
RSAD2	Naive Treg	4.53579	5.30185	40.8758	1.78981e-08	1.34916e-05
RPL3	Naive Treg	-0.644197	12.2523	40.2021	3.75099e-08	2.35625e-05
EEF1B2	Naive Treg	-0.641945	10.8512	38.5981	6.11264e-08	2.80009e-05
HERC6	Naive Treg	2.19672	5.20103	38.5024	6.35713e-08	2.80009e-05
EEF1G	Naive Treg	-0.695587	10.6203	38.3064	6.68634e-08	2.80009e-05
EIF2AK2	Naive Treg	2.25217	7.01414	37.2088	9.40835e-08	3.33769e-05
IFIT1	Naive Treg	4.70711	6.05728	36.305	9.74121e-08	3.33769e-05
HERC5	Naive Treg	2.91581	5.07825	36.6638	1.11096e-07	3.43567e-05
ADAR	Naive Treg	0.917305	7.25023	36.4691	1.18503e-07	3.43567e-05
OAS1	Naive Treg	3.15006	6.05992	36.0778	1.35059e-07	3.63597e-05
IRF7	Naive Treg	2.19206	6.55885	34.6696	2.10153e-07	4.95041e-05
ISG15	Naive Treg	2.67125	8.90732	34.2654	2.38975e-07	5.29821e-05
RPS14	Naive Treg	-0.589793	12.5562	33.1627	3.41753e-07	6.18681e-05
RPS27A	Naive Treg	-0.542135	12.6492	32.8382	3.80038e-07	6.51074e-05
SAMD9	Naive Treg	1.21923	7.35514	32.3661	4.44044e-07	7.27653e-05
OAS2	Naive Treg	1.60623	6.1494	31.7839	5.40322e-07	8.48531e-05
MX1	Naive Treg	2.37025	7.60333	31.64	5.65066e-07	8.51894e-05
RPS4X	Naive Treg	-0.58452	12.3029	31.3698	6.17682e-07	8.95401e-05
LY6E	Naive Treg	1.57058	8.07554	31.0041	6.98163e-07	9.39778e-05
EIF3L	Naive Treg	-0.740631	7.25134	30.4449	8.4279e-07	0.00010582
RPS6	Naive Treg	-0.533196	12.6413	30.1246	9.38828e-07	0.000110576
SP100	Naive Treg	0.960851	8.19072	29.9643	9.91403e-07	0.00011323
PLSCR1	Naive Treg	2.16534	5.57938	29.3834	1.21302e-06	0.000126997
IFI44	Naive Treg	2.71784	5.36639	28.4916	1.64924e-06	0.000154798
RPL4	Naive Treg	-0.573297	10.3577	28.2953	1.75718e-06	0.000154798
PARP9	Naive Treg	1.94542	5.796	28.2939	1.76601e-06	0.000154798
TYMP	Naive Treg	1.81352	5.02967	28.3045	1.76607e-06	0.000154798
SHISA5	Naive Treg	0.764326	6.4567	27.8959	2.02027e-06	0.000173054
DDX60	Naive Treg	1.97159	5.94555	27.3904	2.41837e-06	0.000189976
LAP3	Naive Treg	1.18824	5.82793	27.3835	2.41944e-06	0.000189976
IFI16	Naive Treg	0.871625	8.05589	27.0441	2.72095e-06	0.000201249
SPATS2L	Naive Treg	2.03634	4.96735	27.0539	2.73474e-06	0.000201249
IFIT5	Naive Treg	2.05793	4.92192	26.9731	2.77658e-06	0.000201249
EPSTI1	Naive Treg	1.87232	6.65405	26.7481	3.02312e-06	0.000211003
MX2	Naive Treg	1.88853	6.75044	26.4949	3.30776e-06	0.000222624
IFI6	Naive Treg	2.20923	7.30507	25.219	5.21675e-06	0.000327699
SAMD9L	Naive Treg	1.65226	6.62329	24.8154	6.04317e-06	0.000373389
RPL27	Naive Treg	-0.553814	11.2573	24.5132	6.73401e-06	0.000402482
RPS3A	Naive Treg	-0.583569	12.8001	24.4726	6.8344e-06	0.000402482
IFI35	Naive Treg	1.38417	5.63362	23.2163	1.08727e-05	0.000572805
DTX3L	Naive Treg	1.32169	5.42696	23.2022	1.09424e-05	0.000572805
ACTG1	Naive Treg	-0.546854	10.1856	23.0468	1.15486e-05	0.000588197
IRF9	Naive Treg	0.9117	7.05213	22.9755	1.18617e-05	0.000596089
HSH2D	Naive Treg	1.69933	4.7935	22.6888	1.32881e-05	0.000650425
ZCCHC2	Naive Treg	1.14319	5.57909	21.822	1.83117e-05	0.000853411
FBL	Naive Treg	-0.522002	6.93792	21.8134	1.83408e-05	0.000853411
UBALD2	Naive Treg	0.532995	7.77353	21.4553	2.10026e-05	0.000925159
CHMP5	Naive Treg	0.821614	6.32795	21.3323	2.20207e-05	0.00093357
CAPN2	Naive Treg	0.609857	5.91023	21.2689	2.25652e-05	0.00094498
PHF11	Naive Treg	0.674688	6.52956	21.2208	2.29714e-05	0.000951419
IFIH1	Naive Treg	1.52691	4.91572	19.9842	3.71604e-05	0.00142916
MT-CO3	Naive Treg	-0.592946	13.1746	19.8017	3.96664e-05	0.00151013
BISPR	Naive Treg	1.63493	4.56317	19.4719	4.54267e-05	0.00167856
PNPT1	Naive Treg	0.926424	5.58052	19.1402	5.14695e-05	0.00188338
N4BP1	Naive Treg	0.546336	6.29342	19.023	5.38334e-05	0.00195094
TRIM22	Naive Treg	0.927906	7.05035	18.8339	5.79919e-05	0.00204272
ABHD14B	Naive Treg	-0.688072	5.5471	18.7643	5.97566e-05	0.0020752
SP110	Naive Treg	0.591996	7.73965	18.5594	6.46369e-05	0.00219474
MT-ATP6	Naive Treg	-0.563317	13.2948	18.1404	7.63571e-05	0.00256669
HIST1H1E	Naive Treg	0.6749	6.31904	18.1251	7.69531e-05	0.00256669
USP18	Naive Treg	2.29761	4.85824	17.7977	8.77645e-05	0.00285159
PRKCA	Naive Treg	-0.549698	5.78835	17.3477	0.000105093	0.00335673
MT-CYB	Naive Treg	-0.667163	12.5302	17.1841	0.000112181	0.0034943
SOCS3	Naive Treg	1.26502	7.31106	17.1316	0.000114608	0.00353386
NT5C3A	Naive Treg	0.839078	6.38186	16.3003	0.000160972	0.00481512
PARP10	Naive Treg	1.01395	5.17644	15.4476	0.000229518	0.00640781
PARP12	Naive Treg	0.958235	5.01015	15.0612	0.000270079	0.00743012
PARP14	Naive Treg	0.994216	6.27039	14.9393	0.000283542	0.00774399
STAT1	Naive Treg	1.19386	7.08963	14.8341	0.000296272	0.00797608
IFITM2	Naive Treg	0.521231	8.19837	14.7322	0.000309243	0.00826623
PLP2	Naive Treg	0.537844	5.77335	14.7144	0.0003118	0.00827587
PALM2-AKAP2	Naive Treg	0.718481	5.7172	14.5594	0.000332978	0.00871525
C1orf35	Naive Treg	0.541496	5.29464	14.4369	0.000350862	0.00905753
SAT1	Naive Treg	0.568367	7.67659	14.3818	0.000358714	0.0091351
BST2	Naive Treg	0.905778	6.97553	13.5466	0.000512808	0.0126275
RNF213	Naive Treg	0.556109	7.91057	13.2714	0.00057753	0.0140433
RPS10	Naive Treg	-0.513631	10.1763	12.9271	0.000670682	0.0157988
PIM2	Naive Treg	0.522921	6.72852	12.8749	0.00068623	0.0159087
DDX58	Naive Treg	0.725922	5.48773	12.7248	0.000733502	0.016654
LINC01089	Naive Treg	-0.58667	5.81142	12.5952	0.000775966	0.0175127
DDX60L	Naive Treg	0.960544	5.71463	12.4441	0.000829499	0.0186094
PIM1	Naive Treg	0.520152	7.57322	12.2896	0.000887067	0.0195725
NCF1	Naive Treg	-0.503812	5.68339	12.1936	0.000926231	0.020179
PTRHD1	Naive Treg	-0.576221	5.15316	12.0533	0.000986369	0.0212436
IFITM1	Naive Treg	0.890425	8.88912	11.9288	0.00104074	0.0221612
NMI	Naive Treg	0.607659	6.40872	11.755	0.00112458	0.0234494
IKBKE	Naive Treg	-0.51774	5.19041	11.6429	0.00118377	0.0243806
STAT2	Naive Treg	0.840461	5.20894	11.5855	0.00121423	0.024872
C12orf75	Naive Treg	-0.609579	5.35562	11.1873	0.00145156	0.0284911
SHFL	Naive Treg	0.646385	6.03252	11.1745	0.00145895	0.0284911
TAP2	Naive Treg	0.549243	5.47102	10.6616	0.00184161	0.0341923
RFLNB	Naive Treg	-0.546533	6.66173	10.342	0.00213002	0.0389712
SLC2A3	Naive Treg	0.558828	7.62176	10.1002	0.00238042	0.0428738
TNFSF10	Naive Treg	0.591143	6.2393	10.093	0.00238883	0.0428738
LGALS3BP	Naive Treg	0.701647	5.23592	9.69943	0.00286843	0.0482692
ADTRP	Naive Treg	0.577315	5.87979	9.6574	0.00292315	0.0487573
GPA33	Naive Treg	0.516137	5.25543	9.65833	0.00292362	0.0487573
IFI44L	Naive B	4.70073	8.51813	52.3268	1.39273e-09	5.11272e-06
XAF1	Naive B	2.62791	8.57654	47.3539	5.33305e-09	9.78882e-06
IFIH1	Naive B	1.23338	5.85581	42.3115	2.23698e-08	2.57307e-05
MX1	Naive B	2.44726	7.95155	40.7841	3.49937e-08	2.57307e-05
EIF2AK2	Naive B	2.12716	7.55131	40.4548	3.85901e-08	2.57307e-05
RSAD2	Naive B	4.26022	4.87168	40.0464	4.2055e-08	2.57307e-05
EPSTI1	Naive B	1.97935	7.24402	38.1129	7.81477e-08	3.76518e-05
SHISA5	Naive B	0.786156	6.58348	37.954	8.20524e-08	3.76518e-05
USP18	Naive B	3.75186	4.59316	37.3203	1.00054e-07	4.08111e-05
IFI44	Naive B	3.36885	5.78116	36.8016	1.17737e-07	4.20105e-05
IFIT3	Naive B	4.88303	6.75686	36.2482	1.40053e-07	4.20105e-05
SAMD9L	Naive B	1.71996	7.81963	36.0843	1.46186e-07	4.20105e-05
TYMP	Naive B	1.57862	6.42077	36.0289	1.48771e-07	4.20105e-05
CMPK2	Naive B	4.60304	4.78305	35.4384	1.74392e-07	4.44839e-05
ADAR	Naive B	0.988402	7.28726	35.2705	1.88725e-07	4.44839e-05
HSH2D	Naive B	0.969038	6.49709	35.1856	1.93882e-07	4.44839e-05
CCSER1	Naive B	1.93494	4.94455	34.7055	2.26609e-07	4.89343e-05
PLSCR1	Naive B	2.45248	6.33297	33.9365	2.88552e-07	5.88486e-05
MT-CO3	Naive B	-0.672016	13.5664	33.4025	3.42266e-07	6.2825e-05
DDX60	Naive B	1.95032	5.63732	33.4099	3.42277e-07	6.2825e-05
PARP9	Naive B	1.81898	6.11824	32.9487	3.9663e-07	6.93348e-05
IRF7	Naive B	1.94292	7.12453	32.2751	4.93526e-07	8.23516e-05
HERC6	Naive B	2.34525	4.71587	31.9081	5.61645e-07	8.96434e-05
OAS2	Naive B	1.62767	6.22881	31.3696	6.64953e-07	9.52126e-05
TRIM69	Naive B	1.47058	4.69786	31.3408	6.73479e-07	9.52126e-05
OAS1	Naive B	1.88438	6.71717	31.1257	7.20448e-07	9.52126e-05
BISPR	Naive B	1.55315	4.5538	31.0459	7.4179e-07	9.52126e-05
SP110	Naive B	0.665455	8.54178	30.286	9.52619e-07	0.000116569
HERC5	Naive B	2.82423	5.45397	30.167	9.94826e-07	0.000117146
LY6E	Naive B	1.20778	8.35195	29.6198	1.19175e-06	0.000132573
LAP3	Naive B	1.4984	6.02089	29.523	1.23222e-06	0.000133044
IFITM1	Naive B	3.06475	7.48844	28.8408	1.55898e-06	0.000163514
MX2	Naive B	2.21971	6.69935	28.6266	1.67076e-06	0.000170371
FAM126A	Naive B	-0.541489	5.83921	28.4942	1.74911e-06	0.00017354
STAT1	Naive B	2.04222	7.1715	28.2859	1.8771e-06	0.000181337
COX5A	Naive B	0.997226	7.37317	27.6676	2.32281e-06	0.000207979
NMI	Naive B	1.16839	6.41637	27.6684	2.32283e-06	0.000207979
IFI6	Naive B	2.75365	6.5032	27.5859	2.39055e-06	0.000208946
VRK2	Naive B	0.702936	4.86825	26.8206	3.12601e-06	0.000266874
IRF9	Naive B	0.993911	7.26096	26.5414	3.44012e-06	0.000280721
TRIM22	Naive B	1.06306	7.8932	26.5405	3.44114e-06	0.000280721
PHF11	Naive B	0.720123	6.77643	26.1124	4.00181e-06	0.000312567
IFITM2	Naive B	0.916704	8.25696	26.0392	4.10603e-06	0.000314026
ISG15	Naive B	2.73678	8.33142	25.5555	4.87492e-06	0.000357917
IFIT1	Naive B	4.09667	5.93992	25.4622	5.02562e-06	0.000361746
CHMP5	Naive B	0.942934	6.38595	24.6897	6.64809e-06	0.000460474
MYD88	Naive B	0.774105	4.99125	24.3872	7.42866e-06	0.000501312
PARP14	Naive B	0.832407	8.38269	24.119	8.16962e-06	0.000517081
ZBP1	Naive B	1.25199	5.69217	23.1948	1.14578e-05	0.000678412
DTX3L	Naive B	1.10728	5.78104	23.0895	1.19156e-05	0.000694319
EIF3L	Naive B	-0.539345	7.24423	22.9358	1.25987e-05	0.000722654
IFI35	Naive B	1.24709	6.05432	22.509	1.47598e-05	0.000820955
SAMD9	Naive B	0.934898	7.38299	21.9363	1.82674e-05	0.000999387
C16orf74	Naive B	-0.600304	6.96113	21.4837	2.16531e-05	0.00113659
UBE2L6	Naive B	1.22362	6.80756	20.8803	2.72097e-05	0.00138732
MRPS18C	Naive B	0.517325	6.36682	20.8159	2.78876e-05	0.0014024
MT-ATP6	Naive B	-0.596468	13.5734	20.7361	2.87415e-05	0.00142581
DDX60L	Naive B	1.26573	5.64553	20.6557	2.96631e-05	0.00143908
SHFL	Naive B	0.837472	5.57767	20.3454	3.34019e-05	0.00154201
TENT5A	Naive B	0.755169	5.12859	20.3313	3.36041e-05	0.00154201
ZCCHC2	Naive B	0.920766	5.33118	20.1628	3.58357e-05	0.00161639
BST2	Naive B	1.07323	7.44868	19.9466	3.89005e-05	0.00168005
UNC93B1	Naive B	0.575422	6.36415	19.8022	4.1136e-05	0.00175593
IFI16	Naive B	0.560969	8.7584	18.9453	5.73987e-05	0.00229033
PSME2	Naive B	0.628114	7.74872	18.7671	6.15524e-05	0.00238082
TRANK1	Naive B	0.743844	5.76984	18.6725	6.39221e-05	0.00241915
RNF213	Naive B	0.873106	7.74885	18.4895	6.86581e-05	0.0025459
HLA-DPB1	Naive B	-0.560965	11.1329	18.4278	7.03486e-05	0.0025825
HEATR5B	Naive B	-0.660442	5.31971	18.2514	7.55221e-05	0.00269167
MT-ND1	Naive B	-0.592522	12.4084	18.1754	7.77319e-05	0.00271818
MT-CYB	Naive B	-0.759667	12.6664	18.1749	7.7747e-05	0.00271818
IFIT2	Naive B	1.85104	5.3318	17.6422	9.62885e-05	0.00318446
LGALS9	Naive B	0.592581	6.7577	16.9993	0.000124442	0.00400726
HELZ2	Naive B	1.00649	5.14056	16.9238	0.000128415	0.00406389
PARP12	Naive B	0.672754	5.2535	16.2781	0.00016692	0.00494163
ISG20	Naive B	0.82624	9.22302	16.0449	0.000183504	0.00522203
HLA-F	Naive B	0.507819	8.12872	15.6444	0.000216399	0.00573093
TAP1	Naive B	0.748991	6.16282	15.1314	0.000267756	0.00662981
PARP10	Naive B	0.770003	4.91152	14.581	0.000337371	0.00764498
DRAP1	Naive B	0.643214	7.83839	13.6379	0.000502997	0.0103404
PML	Naive B	0.654283	4.89599	13.5934	0.000513085	0.0104368
STAT2	Naive B	0.726766	6.41878	13.4068	0.000555437	0.0110217
PNPT1	Naive B	0.685953	5.44217	13.2277	0.000600225	0.0115363
SLFN5	Naive B	2.40971	5.57975	13.0399	0.000651018	0.0121314
AC009950.1	Naive B	0.71232	5.83372	12.9857	0.000666231	0.0121788
MRPL44	Naive B	0.699345	5.35264	12.2653	0.000912294	0.0156497
DDX58	Naive B	0.598675	5.43316	12.2314	0.000925964	0.0158103
MARCKSL1	Naive B	-0.553455	6.8496	12.0954	0.000982713	0.0162502
NAPA	Naive B	0.506785	5.11837	12.0555	0.00100059	0.0164717
IFIT5	Naive B	0.823272	4.89295	11.5677	0.00124268	0.0194953
TRIM25	Naive B	0.573791	4.94725	11.2631	0.00142339	0.0212956
NT5C3A	Naive B	0.584562	7.25509	10.9067	0.00166946	0.0239488
CD1C	Naive B	-0.765967	5.88013	10.9061	0.00167009	0.0239488
ARMH1	Naive B	-0.586254	5.68957	10.5763	0.00193925	0.0266628
PSMB9	Naive B	0.50457	8.32046	10.4197	0.00208214	0.0278962
RFTN1	Naive B	-0.577171	5.73458	10.1242	0.00238379	0.0309218
CASP1	Naive B	0.545808	4.97099	9.65767	0.00295671	0.0360601
SNRNP25	Naive B	-0.516677	5.7984	9.16828	0.0037135	0.042038
GPATCH11	Naive B	-0.541257	5.686	9.15363	0.00373984	0.0421133
KLRK1	Naive B	-0.860404	5.40607	8.65419	0.00473281	0.0498339
TNFSF10	Naive B	0.535261	6.00039	8.64477	0.00475376	0.0498339
XAF1	TrB	3.07652	8.8089	66.7013	4.22358e-11	1.67184e-07
IFI44L	TrB	5.54592	8.70392	62.3421	1.19393e-10	1.67184e-07
EPSTI1	TrB	2.72444	7.54312	62.2382	1.20856e-10	1.67184e-07
EIF2AK2	TrB	2.3414	7.83632	56.6787	4.73884e-10	4.91654e-07
MX1	TrB	2.47702	8.36285	55.1047	7.06546e-10	5.86433e-07
USP18	TrB	5.03058	5.22524	48.5601	1.70651e-09	1.08735e-06
IFI44	TrB	4.34584	6.10033	50.6321	1.83409e-09	1.08735e-06
HSH2D	TrB	1.13976	6.72196	48.7854	3.74119e-09	1.77103e-06
ODF3B	TrB	3.08361	4.49715	48.4668	3.84078e-09	1.77103e-06
ADAR	TrB	1.24416	7.49716	48.2803	4.29008e-09	1.78038e-06
SAMD9L	TrB	1.70295	8.05504	46.0323	7.98327e-09	2.77827e-06
TYMP	TrB	2.05726	6.40583	46.0214	8.03354e-09	2.77827e-06
RSAD2	TrB	5.02983	5.55209	42.0478	1.66721e-08	5.32225e-06
MRPS18B	TrB	0.735722	5.95821	41.7295	2.73603e-08	8.11037e-06
IFIT3	TrB	5.3626	7.02658	41.1725	3.02584e-08	8.3715e-06
LY6E	TrB	1.19318	8.70821	40.978	3.40397e-08	8.82905e-06
LAP3	TrB	1.84525	6.41903	39.3529	5.53034e-08	1.27703e-05
HERC5	TrB	4.42083	6.23092	39.257	5.53893e-08	1.27703e-05
IRF7	TrB	2.09314	7.33734	38.977	6.1841e-08	1.35074e-05
IFITM2	TrB	1.10521	8.25927	38.5726	6.98298e-08	1.44897e-05
IFIT1	TrB	5.29648	6.46377	36.5192	9.89321e-08	1.93416e-05
HERC6	TrB	2.98556	5.02957	37.0475	1.02534e-07	1.93416e-05
DDX60	TrB	2.37669	6.12424	37.1775	1.07916e-07	1.94537e-05
CCSER1	TrB	3.44909	4.6955	36.2502	1.17782e-07	1.94537e-05
IFITM1	TrB	4.28935	7.35166	35.7965	1.18177e-07	1.94537e-05
PLSCR1	TrB	2.83905	6.3936	36.6093	1.28455e-07	1.94537e-05
[truncated: 234 more rows]

## Sheet: COVID_G1 vs Healthy
Gene	Cell Type	logFC	logCPM	F	PValue	p.adjusted
IFI27	CD16+ Monocyte	4.45914	9.34497	25.546	6.17676e-06	0.0377709

## Sheet: COVID_G3_S vs COVID_G3
Gene	Cell Type	logFC	logCPM	F	PValue	p.adjusted
IL1R2	CD14+ Monocyte	8.45876	5.58332	104.052	2.33438e-14	1.36771e-10
SAP30	CD14+ Monocyte	2.89708	6.01039	90.7717	3.5597e-13	1.0351e-09
CD163	CD14+ Monocyte	3.00281	7.43353	88.6696	5.30003e-13	1.0351e-09
ALOX15B	CD14+ Monocyte	5.30079	2.90819	78.5472	1.7151e-12	2.51219e-09
CSGALNACT2	CD14+ Monocyte	1.24895	7.28658	71.839	1.64762e-11	1.93068e-08
TPST1	CD14+ Monocyte	6.1297	2.29727	54.9699	1.99332e-10	1.94647e-07
FKBP5	CD14+ Monocyte	2.8951	7.37638	60.1388	2.3993e-10	2.00821e-07
KLHL8	CD14+ Monocyte	1.45226	5.50038	50.0114	3.10123e-09	2.05682e-06
NFKBIE	CD14+ Monocyte	-2.03782	5.08148	49.5597	3.4949e-09	2.05682e-06
ZBTB16	CD14+ Monocyte	5.60335	5.24602	48.9806	4.12452e-09	2.05682e-06
PHC2	CD14+ Monocyte	1.78563	5.92804	48.8545	4.21178e-09	2.05682e-06
NUDT16	CD14+ Monocyte	1.35682	6.44063	48.8508	4.21263e-09	2.05682e-06
SLC2A6	CD14+ Monocyte	-1.73267	6.29807	44.4113	1.42287e-08	6.41277e-06
MAN2A2	CD14+ Monocyte	1.41961	4.61106	43.2044	2.01363e-08	8.42705e-06
METTL7A	CD14+ Monocyte	1.3509	6.66606	42.2568	2.62252e-08	1.02436e-05
NFIA	CD14+ Monocyte	2.34088	4.94843	41.6307	3.16381e-08	1.15855e-05
JDP2	CD14+ Monocyte	1.70252	6.39911	40.4743	4.39695e-08	1.49448e-05
IFNGR1	CD14+ Monocyte	1.01504	7.90715	40.3256	4.59134e-08	1.49448e-05
SRGAP1	CD14+ Monocyte	4.44895	2.74563	38.4987	5.91299e-08	1.82338e-05
SESN1	CD14+ Monocyte	1.59233	3.76955	39.328	6.24736e-08	1.83016e-05
PTBP2	CD14+ Monocyte	1.29356	4.05103	39.1267	6.60255e-08	1.84211e-05
ADAMTS2	CD14+ Monocyte	7.71958	2.77767	35.1966	8.44262e-08	2.18222e-05
ARL4A	CD14+ Monocyte	1.9849	7.18288	38.2242	8.56648e-08	2.18222e-05
PICK1	CD14+ Monocyte	2.13651	3.31102	37.3576	1.12917e-07	2.75659e-05
TUT7	CD14+ Monocyte	0.996684	6.87983	36.021	1.67438e-07	3.92407e-05
CHPT1	CD14+ Monocyte	1.23465	5.9009	35.7913	1.79791e-07	4.05153e-05
PTEN	CD14+ Monocyte	0.840993	7.58994	35.5832	1.91659e-07	4.159e-05
CELF2	CD14+ Monocyte	0.77646	8.21522	35.2148	2.14856e-07	4.49587e-05
CPM	CD14+ Monocyte	2.19601	4.95195	35.0744	2.25299e-07	4.55181e-05
TMEM39A	CD14+ Monocyte	1.40112	3.78244	34.607	2.62185e-07	5.12047e-05
ECHDC3	CD14+ Monocyte	2.57342	3.10065	34.3513	2.80914e-07	5.30928e-05
TEX2	CD14+ Monocyte	1.89228	3.07526	34.1443	2.9755e-07	5.44795e-05
HIVEP3	CD14+ Monocyte	-2.23718	4.61475	32.376	5.2987e-07	9.4076e-05
PPM1B	CD14+ Monocyte	0.878269	5.81942	32.0022	5.95558e-07	0.000102629
HMGB2	CD14+ Monocyte	1.47875	8.1294	31.3445	7.36769e-07	0.000123335
FLT3	CD14+ Monocyte	4.24303	3.54247	30.8661	7.74689e-07	0.000125923
ICAM1	CD14+ Monocyte	-1.66627	5.89058	31.1123	7.95213e-07	0.000125923
NFKB2	CD14+ Monocyte	-1.3946	6.388	30.3602	1.01786e-06	0.000156937
CD36	CD14+ Monocyte	-1.21492	9.01527	30.1867	1.07766e-06	0.000161898
INSR	CD14+ Monocyte	1.16246	5.19748	29.7502	1.24765e-06	0.00018275
DMXL2	CD14+ Monocyte	-0.880479	8.41374	28.5801	1.84394e-06	0.000262195
SMAP2	CD14+ Monocyte	1.07071	8.54259	28.5235	1.87953e-06	0.000262195
CX3CR1	CD14+ Monocyte	-2.68569	7.07589	28.4429	1.93186e-06	0.000263227
USP15	CD14+ Monocyte	1.06916	8.57212	28.1332	2.14537e-06	0.000285675
ERLIN1	CD14+ Monocyte	1.41853	4.19337	27.2837	2.88242e-06	0.000375291
TRAF3	CD14+ Monocyte	-1.35145	4.8245	25.1648	6.01458e-06	0.000766075
MTMR11	CD14+ Monocyte	-1.18185	5.91726	24.3251	8.09631e-06	0.0010082
RELB	CD14+ Monocyte	-1.29853	5.61195	24.2697	8.25973e-06	0.0010082
RELT	CD14+ Monocyte	-0.734686	6.30832	24.1901	8.4968e-06	0.00101597
UPP1	CD14+ Monocyte	1.12291	7.06302	23.6293	1.03967e-05	0.00121828
GCLC	CD14+ Monocyte	1.29585	4.28906	23.1088	1.26174e-05	0.00144951
MYC	CD14+ Monocyte	1.71661	3.98831	23.0001	1.31365e-05	0.00148013
PTP4A2	CD14+ Monocyte	-0.687993	8.89193	22.413	1.61994e-05	0.0017908
PLAGL2	CD14+ Monocyte	-1.53398	5.54309	22.3421	1.66385e-05	0.00180528
FMN1	CD14+ Monocyte	2.49936	3.90976	22.1746	1.77647e-05	0.00187604
E2F3	CD14+ Monocyte	0.667157	5.58839	22.1396	1.79311e-05	0.00187604
KIF3B	CD14+ Monocyte	-1.09007	4.45768	21.605	2.19129e-05	0.00225242
PREX1	CD14+ Monocyte	0.668419	6.78816	21.4862	2.28367e-05	0.0023069
RARA	CD14+ Monocyte	-0.690967	6.75518	21.292	2.45545e-05	0.00243839
CNTRL	CD14+ Monocyte	0.84134	6.62306	21.1217	2.61742e-05	0.00255591
MAP2K1	CD14+ Monocyte	0.734089	6.02426	20.8567	2.89181e-05	0.0027433
RASSF5	CD14+ Monocyte	-0.864355	6.70104	20.846	2.90297e-05	0.0027433
KLF9	CD14+ Monocyte	2.12224	5.34284	20.6547	3.12284e-05	0.00290424
TRIM13	CD14+ Monocyte	1.16622	4.08709	20.5504	3.25749e-05	0.00298213
ZNF710	CD14+ Monocyte	-0.805906	4.66473	20.4616	3.36186e-05	0.00303033
PEA15	CD14+ Monocyte	-1.49541	5.74136	19.4615	4.91844e-05	0.00434968
UBE2R2	CD14+ Monocyte	-0.562871	7.47059	19.4314	4.97404e-05	0.00434968
NOTCH1	CD14+ Monocyte	-0.930324	5.23569	19.349	5.13818e-05	0.00442714
LINC02207	CD14+ Monocyte	2.05278	2.82448	19.1583	5.39117e-05	0.00451646
HIVEP1	CD14+ Monocyte	-1.03664	4.84004	19.1933	5.45797e-05	0.00451646
CXCR4	CD14+ Monocyte	2.45742	7.3364	19.1835	5.47309e-05	0.00451646
PIM3	CD14+ Monocyte	-1.58027	7.0144	19.0911	5.67225e-05	0.00461579
C15orf39	CD14+ Monocyte	-1.02226	6.22582	19.0441	5.77708e-05	0.0046367
TMEM45A	CD14+ Monocyte	4.26649	1.94925	17.9932	6.10851e-05	0.0047801
CYTH4	CD14+ Monocyte	-0.817468	6.79654	18.8956	6.11892e-05	0.0047801
BHLHE40	CD14+ Monocyte	-1.56897	6.59071	18.5893	6.89405e-05	0.00531477
CLEC4E	CD14+ Monocyte	1.58229	7.27279	18.511	7.10711e-05	0.00540787
RASSF4	CD14+ Monocyte	-0.583922	6.98752	18.4556	7.26269e-05	0.0054554
CRIP1	CD14+ Monocyte	-1.76904	10.3175	18.3417	7.59323e-05	0.00558046
RBP7	CD14+ Monocyte	1.16586	7.61109	18.3329	7.61968e-05	0.00558046
BCL3	CD14+ Monocyte	-1.32133	5.72977	18.2762	7.79369e-05	0.00563744
AL133330.1	CD14+ Monocyte	-1.59462	4.97958	18.1147	8.31103e-05	0.00593833
AREG	CD14+ Monocyte	4.57753	5.05135	18.0817	8.42255e-05	0.00594551
STEAP4	CD14+ Monocyte	-2.39504	5.51206	18.0388	8.55811e-05	0.00596928
AP1G2	CD14+ Monocyte	-0.723452	4.50964	17.7264	9.6902e-05	0.0066794
FBXW7	CD14+ Monocyte	-0.699232	6.38358	17.5495	0.000103773	0.00706986
KCNE1	CD14+ Monocyte	1.48417	4.52901	17.4531	0.000108027	0.00727508
LHFPL2	CD14+ Monocyte	1.73606	4.20213	17.3597	0.000112182	0.00746904
MFSD1	CD14+ Monocyte	0.505445	7.24474	17.322	0.000113586	0.00747755
KLHL5	CD14+ Monocyte	-1.32829	5.17034	17.1519	0.000121633	0.00791833
MARCKSL1	CD14+ Monocyte	-1.42359	5.89806	17.0999	0.000124135	0.00793577
PPIF	CD14+ Monocyte	-1.1526	6.7239	17.09	0.00012461	0.00793577
TMC6	CD14+ Monocyte	-0.794152	5.69823	16.919	0.000133457	0.00840777
SSH2	CD14+ Monocyte	0.810819	6.93208	16.8163	0.000139046	0.00866674
ERGIC1	CD14+ Monocyte	0.809535	6.03191	16.5774	0.000153095	0.0094419
HAL	CD14+ Monocyte	1.30806	4.3391	16.1839	0.00017996	0.0109832
EHBP1L1	CD14+ Monocyte	-0.690817	7.51661	16.1356	0.000183043	0.0110226
AC012368.1	CD14+ Monocyte	1.55235	4.08737	16.1231	0.000184369	0.0110226
ARHGAP24	CD14+ Monocyte	1.11785	5.44204	15.8532	0.000205439	0.0121482
TMEM176B	CD14+ Monocyte	-6.03995	7.47099	15.8299	0.000207343	0.0121482
CBX6	CD14+ Monocyte	-1.10633	6.06304	15.7826	0.000211386	0.0122625
CHIC2	CD14+ Monocyte	0.754407	5.3278	15.7436	0.000214853	0.0123414
CEBPD	CD14+ Monocyte	1.18823	9.24997	15.6373	0.000224303	0.0126712
ZMIZ1	CD14+ Monocyte	-0.772072	6.16124	15.6255	0.000225425	0.0126712
RNASE4	CD14+ Monocyte	1.84385	4.10804	15.6135	0.000227082	0.0126712
TUBA1A	CD14+ Monocyte	-0.976382	8.91876	15.5595	0.000231573	0.0127999
ZBTB7A	CD14+ Monocyte	-0.733032	7.70627	15.4547	0.000241766	0.0130838
BMP2K	CD14+ Monocyte	-0.820657	6.17096	15.4525	0.000242008	0.0130838
DLEU2	CD14+ Monocyte	1.21699	6.12859	15.4388	0.00024341	0.0130838
MYO1G	CD14+ Monocyte	-0.653025	7.8726	15.413	0.000245944	0.0130999
AMPD2	CD14+ Monocyte	-0.797839	6.1617	15.0458	0.000286212	0.0151073
GGA2	CD14+ Monocyte	-0.705768	4.85461	14.9486	0.000298178	0.0154055
EZR	CD14+ Monocyte	-0.871306	7.32897	14.9236	0.000301064	0.0154055
POU2F2	CD14+ Monocyte	-0.742476	8.78407	14.9162	0.000301979	0.0154055
ARSG	CD14+ Monocyte	0.904965	3.98837	14.9184	0.000302378	0.0154055
CRISPLD2	CD14+ Monocyte	1.43654	5.48782	14.8816	0.000306471	0.0154794
INSIG1	CD14+ Monocyte	-1.30752	5.61378	14.6864	0.000332408	0.0165882
SSH1	CD14+ Monocyte	-0.770173	4.88091	14.6754	0.000334085	0.0165882
DPYD	CD14+ Monocyte	0.522396	7.69268	14.6374	0.000339123	0.0166968
RUNX3	CD14+ Monocyte	-1.3533	5.84016	14.6149	0.000342407	0.016718
ROCK1	CD14+ Monocyte	0.538352	8.10038	14.578	0.000347625	0.0168325
FAM89B	CD14+ Monocyte	-0.609879	6.22495	14.522	0.000355883	0.0170912
CD300E	CD14+ Monocyte	-1.36577	7.91298	14.3289	0.000385817	0.0182299
TAGLN2	CD14+ Monocyte	-1.00501	9.05943	14.1508	0.000415803	0.0193073
CIC	CD14+ Monocyte	-0.803335	4.73366	14.1365	0.000418617	0.0193073
IRAK3	CD14+ Monocyte	0.695894	7.9873	14.1168	0.000421801	0.0193073
TAF8	CD14+ Monocyte	0.74244	4.3714	14.0634	0.000432026	0.019622
LFNG	CD14+ Monocyte	-1.01342	6.16016	14.0381	0.000436061	0.0196529
IL4R	CD14+ Monocyte	-0.874684	5.53019	13.883	0.000465661	0.020669
AMPD3	CD14+ Monocyte	-0.943753	3.9058	13.8643	0.000469956	0.0207028
NOL7	CD14+ Monocyte	0.50766	6.435	13.667	0.000510172	0.0223067
SPIDR	CD14+ Monocyte	0.688742	4.90801	13.6484	0.00051456	0.0223319
SH2B3	CD14+ Monocyte	-0.789917	6.68566	13.5876	0.000527668	0.0227324
FNDC3A	CD14+ Monocyte	0.607159	5.57891	13.5336	0.000540065	0.0229496
CST3	CD14+ Monocyte	0.766166	11.047	13.5308	0.000540545	0.0229496
TXNIP	CD14+ Monocyte	1.13873	10.0994	13.4149	0.000567929	0.0239388
RNASE6	CD14+ Monocyte	0.893374	7.03187	13.3971	0.000572279	0.0239499
CD44	CD14+ Monocyte	-0.910021	9.79119	13.3637	0.000580466	0.0240834
MYLIP	CD14+ Monocyte	1.0926	5.3899	13.3513	0.000583691	0.0240834
CRLS1	CD14+ Monocyte	0.650373	5.18328	13.3249	0.000590404	0.024095
FOXN2	CD14+ Monocyte	0.63956	6.22861	13.3172	0.000592197	0.024095
ZNF281	CD14+ Monocyte	0.875502	5.53719	13.2052	0.000621342	0.0248218
IRS2	CD14+ Monocyte	1.82142	7.44358	13.1993	0.000622769	0.0248218
MRPL3	CD14+ Monocyte	0.819183	5.11592	13.1584	0.000634017	0.0250994
ANAPC16	CD14+ Monocyte	0.614005	6.89549	13.0873	0.000653418	0.0256938
IL2RG	CD14+ Monocyte	-2.00595	5.79587	12.8678	0.000718236	0.0280543
LACC1	CD14+ Monocyte	-1.09849	4.47006	12.7601	0.000753242	0.0292268
MAP2K3	CD14+ Monocyte	-0.637474	6.81175	12.738	0.000759477	0.0292748
ANKS1A	CD14+ Monocyte	0.827562	4.03082	12.703	0.000772546	0.029584
IKBKE	CD14+ Monocyte	-1.22949	4.77966	12.6314	0.000795964	0.0302828
ST3GAL1	CD14+ Monocyte	-0.557148	5.39129	12.5888	0.000810298	0.0304329
LONP2	CD14+ Monocyte	0.587886	5.80681	12.5678	0.000817657	0.0305137
C1orf162	CD14+ Monocyte	0.787346	8.78573	12.5073	0.000839282	0.0308432
TMEM176A	CD14+ Monocyte	-5.26096	6.44526	12.5068	0.00083965	0.0308432
TRAF3IP3	CD14+ Monocyte	-0.545122	6.88893	12.4991	0.000842278	0.0308432
FAM117B	CD14+ Monocyte	1.20014	4.97798	12.3536	0.00089785	0.0326739
USP10	CD14+ Monocyte	0.516088	5.83803	12.228	0.000947957	0.0338653
RFX2	CD14+ Monocyte	-1.44138	4.4027	12.2267	0.000949134	0.0338653
CENPB	CD14+ Monocyte	-0.668326	5.0347	12.2192	0.000951814	0.0338653
ASPH	CD14+ Monocyte	1.3931	5.16009	12.2151	0.000953707	0.0338653
HGF	CD14+ Monocyte	1.05372	4.27477	12.1999	0.000961361	0.0339314
CBFA2T3	CD14+ Monocyte	-0.887822	5.11533	12.1556	0.000978668	0.0343354
CSK	CD14+ Monocyte	-0.582107	7.37801	12.1364	0.000986484	0.0344036
IKZF1	CD14+ Monocyte	-0.667591	7.56937	12.0272	0.0010348	0.0358752
BID	CD14+ Monocyte	-0.587658	7.45001	11.9907	0.0010515	0.0362396
NFKBIB	CD14+ Monocyte	-0.819774	5.0321	11.8655	0.00111121	0.0380737
BCAT1	CD14+ Monocyte	2.18073	3.79916	11.6619	0.00121516	0.0405437
MARCKS	CD14+ Monocyte	-1.38835	9.34233	11.6568	0.0012179	0.0405437
NFKB1	CD14+ Monocyte	-0.571258	6.70427	11.6204	0.00123768	0.0409693
FAM214B	CD14+ Monocyte	-0.59788	5.58435	11.575	0.00126295	0.041571
CAMKK2	CD14+ Monocyte	-0.599974	6.39325	11.4869	0.00131306	0.0429788
MIR181A1HG	CD14+ Monocyte	1.57656	4.1567	11.451	0.00133603	0.0434879
CD14	CD14+ Monocyte	-0.833904	10.1333	11.4059	0.00136097	0.0440549
RAPGEF1	CD14+ Monocyte	-0.502218	5.69398	11.3879	0.0013721	0.0441711
HSD17B4	CD14+ Monocyte	0.590736	5.84111	11.3334	0.00140571	0.0446514
ZNF267	CD14+ Monocyte	-0.584628	5.94476	11.3267	0.00140989	0.0446514
BIRC3	CD14+ Monocyte	-1.67234	5.86717	11.2497	0.00145908	0.0452349
SPINT2	CD14+ Monocyte	-0.880521	6.24473	11.2443	0.00146243	0.0452349
TNIP1	CD14+ Monocyte	-0.782032	6.32846	11.2368	0.00146733	0.0452349
SPTLC2	CD14+ Monocyte	1.00168	7.40823	11.2305	0.00147138	0.0452349
RNF19B	CD14+ Monocyte	-0.93389	5.84268	11.2267	0.00147402	0.0452349
SREBF2	CD14+ Monocyte	-0.861648	4.70035	11.2268	0.00147463	0.0452349
GNA15	CD14+ Monocyte	-0.739375	5.36337	11.1796	0.00150544	0.0459394
PLXDC2	CD14+ Monocyte	0.505483	7.7471	11.0738	0.00157793	0.0475534
KSR1	CD14+ Monocyte	-0.756344	5.02687	11.068	0.00158268	0.0475534
CLASP1	CD56dim NK	1.83396	5.72188	50.3985	1.93962e-09	6.03095e-06
MAPK1	CD56dim NK	1.01015	7.93553	48.032	3.70835e-09	6.03095e-06
SLC1A5	CD56dim NK	2.44755	4.4247	47.1598	4.87284e-09	6.03095e-06
FKBP5	CD56dim NK	3.47997	6.21253	40.826	3.01495e-08	2.79862e-05
GPATCH8	CD56dim NK	1.30347	7.38124	35.3344	1.64765e-07	0.000122354
SMAP2	CD56dim NK	1.44961	7.33355	32.4544	4.2017e-07	0.000260015
VAV3	CD56dim NK	0.992504	6.99748	30.8469	7.18519e-07	0.000372359
CRAMP1	CD56dim NK	1.68953	4.84721	30.5531	8.02283e-07	0.000372359
CELF2	CD56dim NK	0.79855	8.87735	30.1513	9.08858e-07	0.000374954
CFLAR	CD56dim NK	0.693607	8.6369	29.3532	1.1936e-06	0.000443184
IKZF1	CD56dim NK	0.789198	8.51876	27.6664	2.14252e-06	0.000723198
SOCS1	CD56dim NK	2.30612	5.71188	20.476	3.02419e-05	0.00935733
APBA2	CD56dim NK	1.70999	5.60589	19.1786	5.01077e-05	0.0138027
GPR65	CD56dim NK	1.02826	7.88564	18.9958	5.37658e-05	0.0138027
MAPRE1	CD56dim NK	-0.636669	6.70881	18.9042	5.57611e-05	0.0138027
BAZ2B	CD56dim NK	1.13334	6.07961	18.4351	6.72019e-05	0.015595
GALC	CD56dim NK	0.988769	5.62511	18.1804	7.44685e-05	0.0162648
NIBAN1	CD56dim NK	1.38561	5.62127	17.8507	8.49747e-05	0.0175284
MCTP2	CD56dim NK	0.687696	7.52956	17.6245	9.29512e-05	0.0181646
PIK3IP1	CD56dim NK	1.71488	6.22886	17.3293	0.000104794	0.019455
YPEL1	CD56dim NK	0.894015	6.74781	17.1301	0.000113568	0.0200799
ZDHHC20	CD56dim NK	0.578134	6.34428	16.8509	0.000127284	0.0214821
SYTL3	CD56dim NK	1.07688	7.50571	16.6398	0.000138711	0.0223927
RASA2	CD56dim NK	0.656821	7.35212	16.4332	0.000150992	0.0227084
NCK2	CD56dim NK	0.926322	5.48013	16.4063	0.000152898	0.0227084
IRF1	CD56dim NK	-0.613466	9.33784	15.8468	0.00019236	0.0267022
IRF2BPL	CD56dim NK	1.06657	5.40999	15.8298	0.000194171	0.0267022
RAP1GDS1	CD56dim NK	0.858731	6.07643	15.572	0.000215757	0.0286109
AKAP13	CD56dim NK	0.634139	8.7436	15.3514	0.000236476	0.0302771
B4GALT4	CD56dim NK	0.97484	5.95468	14.8719	0.000289481	0.035828
SSH2	CD56dim NK	0.843407	6.84884	14.49	0.000340079	0.0394598
RPE	CD56dim NK	1.24844	5.28024	14.2712	0.000373897	0.0410868
TRDC	CD56dim NK	-1.20774	8.8027	14.2523	0.000376233	0.0410868
SUGP2	CD56dim NK	0.746815	6.54386	14.0893	0.000403456	0.0428009
PARP8	CD56dim NK	0.9131	7.39268	13.9826	0.000422231	0.0435484
ERAP1	CD56dim NK	0.935765	5.63282	13.8784	0.000441879	0.0443432
TLE1	CD56dim NK	0.999999	6.79258	13.7195	0.000472801	0.045903
SNTB2	CD56dim NK	0.6916	6.01059	13.643	0.000488796	0.045903
HERC4	CD56dim NK	0.544767	6.21961	13.4747	0.000525535	0.0464598
RHOC	CD56dim NK	-0.676012	8.0633	13.3551	0.000553291	0.047776
LAT	CD56dim NK	-0.569174	7.20769	13.2458	0.000580204	0.0487355
CST7	CD56dim NK	-0.517787	10.7398	13.2045	0.000590654	0.0487355
TFEB	CD56dim NK	1.0887	5.34655	13.1551	0.000604173	0.0487673
FKBP5	CD56bright NK	4.49202	6.37331	49.4616	5.95808e-09	2.11214e-05
GPATCH8	CD56bright NK	1.32269	7.06052	24.7042	8.44103e-06	0.0149617
ANXA1	CD56bright NK	-1.72898	8.92911	22.5604	1.78925e-05	0.0174365
CLASP1	CD56bright NK	1.60979	6.99742	21.5923	2.53806e-05	0.0174365
PIK3IP1	CD56bright NK	1.86438	6.31978	21.2078	2.93089e-05	0.0174365
CAPG	CD56bright NK	-1.74057	7.48043	21.1747	2.95117e-05	0.0174365
SUGP2	CD56bright NK	1.28191	6.69156	19.3365	5.83779e-05	0.0295642
GATA3	CD56bright NK	-1.33258	7.61898	18.9633	6.708e-05	0.0297248
LINC02446	CD56bright NK	3.40808	6.66586	18.2782	8.74923e-05	0.0344622
ATP2B4	CD56bright NK	-1.38859	6.76393	17.66	0.000110491	0.039169
RASA2	CD56bright NK	1.29084	6.72878	16.8881	0.000149299	0.048115
FBXO32	Naive CD8+ T	1.9378	4.53677	67.9119	2.71674e-11	1.19075e-07
FKBP5	Naive CD8+ T	2.65763	6.74823	60.4068	1.62972e-10	3.57154e-07
GGNBP2	Naive CD8+ T	0.84881	6.76544	53.858	8.60366e-10	1.25699e-06
TXK	Naive CD8+ T	0.968394	7.23835	50.885	1.89401e-09	2.07536e-06
NDFIP1	Naive CD8+ T	0.919204	7.64179	45.8419	7.61639e-09	6.00407e-06
KLF7	Naive CD8+ T	1.06165	4.98549	45.575	8.21912e-09	6.00407e-06
TNFSF8	Naive CD8+ T	2.03254	4.19006	36.4731	1.23579e-07	7.7378e-05
CELF2	Naive CD8+ T	0.722193	7.62327	33.8951	2.79865e-07	0.000153331
SEMA4D	Naive CD8+ T	0.819876	6.6358	32.8416	3.93835e-07	0.000191798
CIAPIN1	Naive CD8+ T	1.13193	4.83773	32.2834	4.72954e-07	0.000207296
PIK3IP1	Naive CD8+ T	0.932035	7.99956	30.3675	8.93608e-07	0.000356062
AK3	Naive CD8+ T	0.804346	4.80618	27.6467	2.26672e-06	0.000827918
ETS1	Naive CD8+ T	0.706389	9.01355	27.3132	2.54544e-06	0.000858203
LAT	Naive CD8+ T	-0.607537	7.27612	26.8183	3.02766e-06	0.000947874
SMAP2	Naive CD8+ T	1.13721	7.70207	26.3692	3.54733e-06	0.00103653
AP1AR	Naive CD8+ T	0.801429	4.35562	23.8906	8.65568e-06	0.00223164
DENND6A	Naive CD8+ T	0.651453	4.76736	23.6365	9.49874e-06	0.00231294
VSIR	Naive CD8+ T	0.760173	6.11182	23.1693	1.12797e-05	0.00259625
CD28	Naive CD8+ T	-0.839829	5.20094	23.037	1.18469e-05	0.00259625
SCML4	Naive CD8+ T	0.887718	6.12959	22.5774	1.40498e-05	0.00293239
TSPAN14	Naive CD8+ T	0.610999	6.54201	21.1426	2.41112e-05	0.00459873
UGCG	Naive CD8+ T	0.932456	4.59274	21.141	2.41321e-05	0.00459873
YPEL2	Naive CD8+ T	1.02122	5.27958	20.983	2.56239e-05	0.00467956
NCK2	Naive CD8+ T	0.589214	6.65511	20.4252	3.17199e-05	0.00556113
SNX9	Naive CD8+ T	1.08961	4.34427	19.9774	3.7712e-05	0.00590327
LTB	Naive CD8+ T	-0.791348	10.3406	18.5895	6.48642e-05	0.00980345
FLI1	Naive CD8+ T	0.523781	5.54207	17.8914	8.56044e-05	0.0124637
IL6ST	Naive CD8+ T	1.00875	6.72462	17.7513	9.0534e-05	0.0124637
N4BP2	Naive CD8+ T	0.752565	6.14321	17.7386	9.09966e-05	0.0124637
CCND3	Naive CD8+ T	0.759845	7.4949	17.5814	9.69145e-05	0.0125277
FAM241A	Naive CD8+ T	1.21287	3.83655	17.5766	9.71803e-05	0.0125277
MIR181A1HG	Naive CD8+ T	0.90139	4.31935	17.3083	0.000108202	0.0133429
SLC16A10	Naive CD8+ T	0.784016	4.87457	17.2763	0.000109593	0.0133429
HBS1L	Naive CD8+ T	0.513021	5.53975	16.9904	0.000123014	0.0145721
CD74	Naive CD8+ T	-0.743772	6.23076	16.2776	0.00016449	0.018024
IL10RA	Naive CD8+ T	-0.725423	4.94239	16.2049	0.000169485	0.0181184
SLA	Naive CD8+ T	0.959627	5.18165	16.0629	0.000179665	0.0184323
RAP1GDS1	Naive CD8+ T	0.564806	4.44109	16.0475	0.000180833	0.0184323
UBL3	Naive CD8+ T	0.517289	5.49994	15.4004	0.000236335	0.023019
BCL2L11	Naive CD8+ T	0.961027	4.82274	13.7637	0.000471588	0.0399811
IL7R	Naive CD8+ T	0.871349	10.2867	13.7345	0.000477468	0.0399811
RCSD1	Naive CD8+ T	0.52931	6.65036	13.6572	0.00049356	0.0399811
KLF9	Naive CD8+ T	1.36287	5.08055	13.5842	0.000509332	0.0399811
SRA1	Naive CD8+ T	-0.690289	4.94233	13.5774	0.000510824	0.0399811
IRF2BP2	Naive CD8+ T	-0.605883	6.67221	13.4943	0.000529347	0.040704
MZF1-AS1	Naive CD8+ T	-0.961356	4.66354	13.4195	0.000546778	0.0413194
AUTS2	Naive CD8+ T	1.48355	3.8299	13.1289	0.000620321	0.0460825
TMX3	Naive CD8+ T	0.553734	4.80946	13.0621	0.000638088	0.0466123
IKBKE	Naive CD8+ T	-0.658965	5.05049	12.9299	0.000675773	0.0477728
GGNBP2	Naive CD4+ T	0.889252	6.68207	94.3687	1.38679e-13	5.17272e-10
FBXO32	Naive CD4+ T	1.69634	4.57618	84.3535	9.67485e-13	1.44468e-09
NDFIP1	Naive CD4+ T	1.04641	7.86467	83.4439	1.16194e-12	1.44468e-09
DENND6A	Naive CD4+ T	0.890327	4.70047	75.8384	5.65754e-12	5.27566e-09
CIAPIN1	Naive CD4+ T	1.28449	4.70966	70.4648	1.83325e-11	1.36761e-08
ZBTB16	Naive CD4+ T	6.31299	1.2114	60.9628	1.72765e-10	1.07402e-07
FKBP5	Naive CD4+ T	2.68315	6.95257	58.8723	2.78651e-10	1.48481e-07
HBS1L	Naive CD4+ T	0.951327	5.54762	56.6023	4.90756e-10	2.06546e-07
TXK	Naive CD4+ T	1.05462	7.09754	56.5412	4.98368e-10	2.06546e-07
CELF2	Naive CD4+ T	0.984221	7.86535	56.026	5.67644e-10	2.11731e-07
RASA1	Naive CD4+ T	1.41248	4.1723	51.8482	1.67034e-09	5.66396e-07
TNFSF8	Naive CD4+ T	2.69214	3.82336	49.2037	3.38328e-09	1.04143e-06
UGP2	Naive CD4+ T	0.72869	6.16008	48.9429	3.62964e-09	1.04143e-06
KLF7	Naive CD4+ T	0.969912	4.87695	45.7794	8.67446e-09	2.31112e-06
VSIR	Naive CD4+ T	1.12332	5.99264	42.6362	2.12099e-08	5.25762e-06
USP34	Naive CD4+ T	0.656155	6.50723	42.4241	2.25528e-08	5.25762e-06
LTB	Naive CD4+ T	-1.01423	10.787	41.9821	2.56433e-08	5.62643e-06
CD28	Naive CD4+ T	-0.835017	6.13323	40.9283	3.49163e-08	7.23543e-06
MIR181A1HG	Naive CD4+ T	1.28482	4.37553	38.9737	6.24924e-08	1.22682e-05
LAT	Naive CD4+ T	-0.589009	7.30792	38.6981	6.78972e-08	1.26628e-05
DIP2B	Naive CD4+ T	0.714122	4.66829	37.6216	9.41644e-08	1.67254e-05
SEMA4D	Naive CD4+ T	0.741074	6.54482	34.2944	2.65446e-07	4.50051e-05
SESN3	Naive CD4+ T	1.53273	5.27282	34.0428	2.87565e-07	4.66356e-05
CDC37L1	Naive CD4+ T	0.651034	4.70994	32.7688	4.3286e-07	6.45827e-05
IL6ST	Naive CD4+ T	1.03247	7.90037	32.1259	5.33318e-07	7.65106e-05
PIK3IP1	Naive CD4+ T	0.955025	8.23759	31.3726	6.82542e-07	9.4292e-05
TRBC1	Naive CD4+ T	-0.841755	9.19338	30.9054	7.96306e-07	0.000102421
SCML4	Naive CD4+ T	0.806958	6.176	30.7028	8.51624e-07	0.000105885
PRDX6	Naive CD4+ T	0.564322	6.40721	29.8551	1.12987e-06	0.000133187
SLA	Naive CD4+ T	0.972724	5.27913	29.8217	1.14262e-06	0.000133187
BTG1	Naive CD4+ T	0.704282	10.4931	27.7577	2.30466e-06	0.000252834
SMAP2	Naive CD4+ T	1.34786	7.68383	27.4456	2.56685e-06	0.000273552
UFD1	Naive CD4+ T	0.595229	5.9964	27.246	2.75055e-06	0.000284988
RBMS1	Naive CD4+ T	0.840064	7.12612	27.1179	2.87561e-06	0.000289893
YIPF4	Naive CD4+ T	0.573431	6.15597	26.3677	3.73661e-06	0.000366777
YPEL2	Naive CD4+ T	1.17162	5.16045	25.0213	6.01913e-06	0.000575676
RCSD1	Naive CD4+ T	0.796668	6.47009	24.7941	6.5289e-06	0.00060882
PAGR1	Naive CD4+ T	-0.516221	5.28993	24.4548	7.37558e-06	0.000670998
CLEC2D	Naive CD4+ T	-0.593317	8.36901	23.857	9.15525e-06	0.000791238
ETS1	Naive CD4+ T	0.652201	9.38938	23.8039	9.33364e-06	0.000791238
PCNX1	Naive CD4+ T	0.728895	5.11545	23.6065	1.00291e-05	0.000831302
SERINC5	Naive CD4+ T	0.537419	7.01885	23.3182	1.11423e-05	0.000903493
STX2	Naive CD4+ T	0.865824	4.25166	23.0526	1.22825e-05	0.000940603
ARHGAP5	Naive CD4+ T	1.06049	4.80773	22.9744	1.26399e-05	0.000942934
SAE1	Naive CD4+ T	0.605259	5.25437	21.6869	2.03828e-05	0.00149074
FAM241A	Naive CD4+ T	1.20693	4.11083	20.958	2.68239e-05	0.0018763
SAMHD1	Naive CD4+ T	0.645473	7.9428	20.5297	3.15615e-05	0.00214044
DYRK2	Naive CD4+ T	-0.590497	6.64035	20.3845	3.33584e-05	0.00222191
CCND3	Naive CD4+ T	0.880025	7.4968	20.0042	3.85893e-05	0.00240957
CEMIP2	Naive CD4+ T	0.966581	6.58105	19.4314	4.81346e-05	0.00287732
ADGRE5	Naive CD4+ T	0.808888	6.46242	18.7882	6.18373e-05	0.00337995
SP4	Naive CD4+ T	0.55348	4.49362	18.7314	6.32303e-05	0.00337995
KLF9	Naive CD4+ T	1.72652	4.86507	18.708	6.38106e-05	0.00337995
BICDL1	Naive CD4+ T	-0.770477	5.50435	18.6516	6.52429e-05	0.00337995
TMEM126A	Naive CD4+ T	-0.527335	5.25427	18.5092	6.89906e-05	0.0034842
DOK2	Naive CD4+ T	-0.996214	5.73742	18.5043	6.91235e-05	0.0034842
KCNQ1OT1	Naive CD4+ T	0.743696	5.61124	18.3522	7.33884e-05	0.00364985
C17orf49	Naive CD4+ T	-0.66057	6.55248	18.2044	7.77939e-05	0.00372014
TRAC	Naive CD4+ T	-0.541832	9.24821	17.8506	8.94978e-05	0.00409654
ATXN2	Naive CD4+ T	0.501479	5.23276	17.8118	9.08916e-05	0.00409654
OCIAD2	Naive CD4+ T	-0.5253	7.9255	17.6297	9.77226e-05	0.00433935
SNX9	Naive CD4+ T	0.831735	4.84413	17.5858	9.94516e-05	0.00436417
ANKRD55	Naive CD4+ T	1.80649	4.79151	17.2918	0.00011186	0.00473902
CD74	Naive CD4+ T	-0.852179	6.24561	17.2814	0.000112324	0.00473902
RERE	Naive CD4+ T	0.546342	5.2218	17.2234	0.000114968	0.00473902
ZNF609	Naive CD4+ T	0.591627	5.22054	17.2139	0.000115412	0.00473902
LPXN	Naive CD4+ T	-0.595816	5.31486	17.0981	0.000120908	0.00479775
MAN1C1	Naive CD4+ T	-0.569508	5.54131	16.8734	0.000132365	0.00514294
CHCHD1	Naive CD4+ T	-0.504679	5.65526	16.8054	0.000136049	0.00520074
PDCL3	Naive CD4+ T	-0.56475	5.59351	16.7946	0.000136641	0.00520074
TUBA4A	Naive CD4+ T	0.731049	6.61687	16.6076	0.000147385	0.0054028
TMF1	Naive CD4+ T	0.547245	6.41806	16.6016	0.000147744	0.0054028
CCM2	Naive CD4+ T	-0.501572	6.36876	16.0749	0.000183098	0.00628991
CERS6	Naive CD4+ T	0.517324	5.13249	14.7687	0.000314306	0.00960951
SH3BP5	Naive CD4+ T	-0.811135	5.74333	14.6672	0.000327951	0.00976812
IQGAP2	Naive CD4+ T	0.583726	5.45509	14.6526	0.000329969	0.00976812
P2RY10	Naive CD4+ T	-0.753474	5.13056	14.4488	0.000359463	0.0103938
CA5B	Naive CD4+ T	0.6728	5.18646	14.3614	0.000372937	0.0106187
ARID5A	Naive CD4+ T	-0.652904	5.27086	14.0012	0.000434283	0.0121766
NFKB2	Naive CD4+ T	-0.657183	4.82253	13.7582	0.000481587	0.0132082
HMGB2	Naive CD4+ T	0.53987	6.79759	13.6286	0.000508909	0.0137553
BCL2	Naive CD4+ T	1.0156	7.1645	13.3949	0.000562468	0.0150936
FAM107B	Naive CD4+ T	-0.657992	8.10021	13.2619	0.00059553	0.0158666
XPO1	Naive CD4+ T	0.53698	6.16401	13.1993	0.000611775	0.0161491
OTULINL	Naive CD4+ T	-0.551304	4.7649	13.1089	0.000636096	0.0164766
DGKH	Naive CD4+ T	0.775753	3.95347	12.8861	0.000700396	0.0175334
N4BP2	Naive CD4+ T	0.65414	6.00562	12.3929	0.000868	0.0207541
ARRDC3	Naive CD4+ T	0.926804	6.02482	12.3078	0.000900925	0.0211349
IRF2BP2	Naive CD4+ T	-0.639664	6.73643	12.2431	0.000926839	0.0213064
STMN3	Naive CD4+ T	0.618401	5.99343	12.2387	0.00092863	0.0213064
KIAA0355	Naive CD4+ T	0.534697	5.34028	12.2184	0.000936951	0.0213099
CRELD2	Naive CD4+ T	-0.569189	4.90395	12.1065	0.000984132	0.022154
SAMSN1	Naive CD4+ T	-0.666823	5.0662	12.1024	0.00098594	0.022154
ICOS	Naive CD4+ T	-0.753079	5.87478	12.0275	0.00101895	0.0226232
CRYBG1	Naive CD4+ T	0.734299	5.17601	11.6129	0.00122397	0.0257933
IL10RA	Naive CD4+ T	-0.591917	4.96644	11.3489	0.00137658	0.0278673
SKIL	Naive CD4+ T	-0.675235	5.33235	11.2664	0.00142829	0.0283378
IL7R	Naive CD4+ T	0.718117	10.6093	11.1125	0.00153014	0.0297068
COTL1	Naive CD4+ T	-0.582739	7.5555	11.0079	0.00160374	0.0303652
CXCR4	Naive CD4+ T	1.10748	9.05643	10.8624	0.0017123	0.031839
THEM4	Naive CD4+ T	0.788882	5.82228	10.6342	0.00189838	0.0342075
PCGF5	Naive CD4+ T	0.569416	5.96824	10.5275	0.00199249	0.0353063
SOCS1	Naive CD4+ T	1.11237	5.80331	10.5223	0.00199722	0.0353063
RESF1	Naive CD4+ T	0.649578	7.37528	10.3627	0.0021476	0.0372378
TSPYL2	Naive CD4+ T	0.591591	5.51372	10.2805	0.00222968	0.0378033
NUP107	Naive CD4+ T	0.569069	4.91153	10.2083	0.00230447	0.038236
EXOSC7	Naive CD4+ T	-0.552149	5.16725	10.1351	0.0023829	0.0386872
DNPH1	Naive CD4+ T	-0.656006	5.91706	9.76641	0.00282318	0.0432015
TOB1	Naive CD4+ T	0.840927	6.99391	9.67417	0.00294614	0.0444902
APOL3	Naive CD4+ T	-0.734633	5.03834	9.63362	0.00300199	0.0451509
RGL4	Naive CD4+ T	-0.687012	5.63962	9.55047	0.00311995	0.0465497
OPTN	Naive CD4+ T	-0.51605	5.90956	9.53596	0.00314101	0.0466465
UQCC2	Naive CD4+ T	-0.503661	5.70576	9.52029	0.00316396	0.0466465
FKBP5	Naive B	3.96625	4.64296	66.5763	3.93741e-11	1.40172e-07
GLO1	Naive B	1.54461	5.81352	50.9113	2.04003e-09	3.63125e-06
USP12	Naive B	1.54245	5.64629	48.5403	3.87775e-09	4.6016e-06
GAB1	Naive B	2.08817	4.80308	42.4489	2.16511e-08	1.92695e-05
ZBTB16	Naive B	6.14621	4.19299	34.5251	2.20222e-07	0.000156798
SOCS1	Naive B	1.89535	5.4829	32.0756	5.28748e-07	0.000281877
YBX3	Naive B	1.28305	8.77203	31.8538	5.6732e-07	0.000281877
TP53INP1	Naive B	1.90495	6.6558	31.4379	6.51035e-07	0.000281877
SESN1	Naive B	2.51586	4.69597	31.1627	7.1261e-07	0.000281877
G3BP1	Naive B	0.64189	6.51328	30.3413	9.36869e-07	0.000333525
IRF8	Naive B	0.786641	7.84905	29.4106	1.28086e-06	0.000414534
TLE1	Naive B	1.41655	7.18411	28.8889	1.52923e-06	0.000453672
PIK3IP1	Naive B	1.49884	6.21587	26.5881	3.39137e-06	0.000928715
DAAM1	Naive B	1.37478	4.9225	26.3735	3.66251e-06	0.000931325
RUBCNL	Naive B	-0.718929	6.42457	24.9015	6.16663e-06	0.00146355
LTB	Naive B	-0.672922	10.9376	24.457	7.23546e-06	0.00151566
GGNBP2	Naive B	0.644844	6.97649	24.4566	7.23772e-06	0.00151566
TRABD	Naive B	-0.886863	5.51583	24.295	7.67944e-06	0.00151882
SMAP2	Naive B	1.41006	8.29625	23.6808	9.59217e-06	0.00158268
AC025164.1	Naive B	1.11263	5.89022	23.6743	9.62453e-06	0.00158268
BTLA	Naive B	0.841332	6.3471	23.5754	9.97258e-06	0.00158268
BCL7B	Naive B	-0.721356	5.39017	23.5149	1.02032e-05	0.00158268
MGAT5	Naive B	1.0955	5.97931	23.5091	1.02252e-05	0.00158268
CFLAR	Naive B	0.870322	6.35091	22.9504	1.25467e-05	0.00173395
IL7R	Naive B	3.76821	4.27655	22.7512	1.26366e-05	0.00173395
PTK2B	Naive B	0.66314	6.34733	22.9253	1.26636e-05	0.00173395
TFEB	Naive B	0.849801	5.59444	21.3667	2.26616e-05	0.00298797
SOCS5	Naive B	1.62873	4.14708	21.0403	2.551e-05	0.00324341
NOTCH2	Naive B	0.769306	6.48389	20.6315	2.99414e-05	0.00367556
ZNF318	Naive B	0.918327	5.84952	19.9639	3.87032e-05	0.00459278
NUDT4	Naive B	0.808233	5.16803	19.101	5.41206e-05	0.00621514
CARMIL1	Naive B	2.99885	3.8243	18.3465	6.96045e-05	0.00748066
SEMA4D	Naive B	0.850293	4.8895	18.3946	7.14445e-05	0.00748066
CCND3	Naive B	1.47272	6.77339	18.0479	8.18311e-05	0.00832339
LYSMD2	Naive B	-0.867378	6.40237	17.2427	0.000112887	0.011132
FOXO3	Naive B	1.25648	4.06689	17.1693	0.000115697	0.011132
PHF10	Naive B	0.888745	5.31352	16.9059	0.00012943	0.0121255
RASA2	Naive B	0.583449	5.98421	16.6146	0.000145579	0.0130921
CCDC6	Naive B	0.765641	5.8423	16.5896	0.000147102	0.0130921
SLC25A24	Naive B	0.865314	5.32871	16.489	0.000153276	0.0131608
SEC61B	Naive B	-0.521702	7.36883	16.455	0.000155267	0.0131608
NCK2	Naive B	0.78351	6.83321	16.3251	0.000163721	0.0135546
WEE1	Naive B	2.20831	4.90484	16.0782	0.000181224	0.0146627
ABCE1	Naive B	0.508725	5.86454	15.9277	0.000192742	0.0150442
CYB561A3	Naive B	-0.549189	7.86907	15.9059	0.000194391	0.0150442
PYCARD	Naive B	-0.689714	6.3254	15.7851	0.00020433	0.0154769
RNASE6	Naive B	1.54392	6.30515	15.4531	0.000234398	0.0173845
SPIB	Naive B	-0.619379	7.75189	15.1255	0.000268509	0.0191178
RELB	Naive B	-0.67083	5.41792	14.9843	0.000284881	0.0198858
GABPB1-IT1	Naive B	0.822292	6.62565	14.7932	0.000308552	0.021124
CAPG	Naive B	-0.985714	6.62645	14.5053	0.000348202	0.02289
PTPN12	Naive B	1.15954	4.78725	14.4677	0.000353638	0.02289
ZNF397	Naive B	0.680951	4.97824	14.4171	0.000361803	0.0230003
KCNQ1OT1	Naive B	0.85893	5.54967	14.3523	0.000371697	0.0231629
HSD17B4	Naive B	0.75452	5.42486	14.3163	0.000377374	0.0231629
LYST	Naive B	0.677545	6.97301	14.0437	0.000423278	0.0255402
ZCCHC10	Naive B	0.712022	6.05546	13.8013	0.000469414	0.0271117
BTG1	Naive B	0.614241	11.0877	13.6873	0.000492678	0.0278402
CEMIP2	Naive B	1.09094	6.50144	13.5475	0.000523145	0.0288117
CSGALNACT1	Naive B	1.32319	4.58857	13.4912	0.000536073	0.0288117
BCL7A	Naive B	-0.832599	7.50858	13.4675	0.000541347	0.0288117
MLXIP	Naive B	0.59662	5.4644	13.4648	0.000542242	0.0288117
SERTAD2	Naive B	0.671447	5.33395	13.2825	0.00058667	0.0302688
HSPA4	Naive B	0.521449	6.37417	13.2049	0.000606157	0.0308274
BMP2K	Naive B	0.719515	6.18198	12.8462	0.000707946	0.035497
FAM200B	Naive B	-0.679344	5.33426	12.7828	0.000728028	0.0359591
ATF7IP	Naive B	0.918783	7.5315	12.7523	0.000737363	0.0359591
STAG3	Naive B	2.1228	4.66706	12.7078	0.000752124	0.0361833
ZFP36L2	Naive B	0.901989	9.11172	12.6622	0.000766829	0.0363657
SLA	Naive B	0.664578	5.78885	12.6347	0.000776346	0.0363657
PDE7A	Naive B	0.6297	6.71434	12.5706	0.000798128	0.0369005
SP100	Naive B	0.502996	8.88511	12.3736	0.000869906	0.0391179
CTDSPL2	Naive B	0.577105	5.42849	12.367	0.000872968	0.0391179
VPREB3	Naive B	-0.651119	9.132	12.3497	0.000879053	0.0391179
ANKZF1	Naive B	0.636972	5.2172	12.1999	0.000939363	0.0400707
ZNRD2	Naive B	-0.633109	5.25147	12.1816	0.000946851	0.0400707
AC007384.1	Naive B	0.7496	5.68022	12.1577	0.000956744	0.0400707
CREB3L2	Naive B	0.798443	4.84666	12.0179	0.00101787	0.0411776
GSAP	Naive B	0.643265	5.72398	11.76	0.00114041	0.0451094
PCDH9	Naive B	0.748973	7.19067	11.6008	0.00122367	0.047871
DTNBP1	Naive B	-0.554251	5.85464	11.4949	0.00128293	0.0490905
MARCH1	Naive B	0.659622	8.27943	11.4791	0.00129177	0.0490905
SPI1	Naive B	-0.563031	6.19418	11.4331	0.00131864	0.0494144
SMAP2	Memory B	1.45489	7.7523	34.6888	2.28482e-07	0.000922152
GLO1	Memory B	1.69987	5.47911	30.5253	8.88307e-07	0.0017926
FKBP5	Memory B	2.23529	4.68051	20.2286	3.52937e-05	0.0261159
YBX3	Memory B	1.4327	8.26893	20.0374	3.76801e-05	0.0261159
CFLAR	Memory B	0.98624	7.11828	19.9424	3.90913e-05	0.0261159
BCL7A	Memory B	-1.49968	6.66603	19.7472	4.21602e-05	0.0261159
SOCS1	Memory B	2.23319	5.05705	19.5718	4.52952e-05	0.0261159
ZNF318	Memory B	1.56075	5.39419	18.9377	5.79111e-05	0.0292161
NFKBIZ	Memory B	1.36652	6.06992	17.6143	9.75161e-05	0.0437305

## Sheet: CD14+ Monocyte
Gene	Comparison	logFC	logCPM	F	PValue	p.adjusted
EEF2	COVID_G2G3 vs Healthy	-1.26207	8.9705	81.378	2.21074e-12	1.45113e-08
EIF4B	COVID_G2G3 vs Healthy	-1.65927	7.42576	77.6094	4.7921e-12	1.57277e-08
EIF3L	COVID_G2G3 vs Healthy	-1.59733	7.18058	73.5754	1.12491e-11	2.46129e-08
EEF1B2	COVID_G2G3 vs Healthy	-1.55407	8.83508	72.1543	1.52899e-11	2.50907e-08
EEF1A1	COVID_G2G3 vs Healthy	-1.14793	12.3192	69.583	2.68967e-11	3.49675e-08
RPS3A	COVID_G2G3 vs Healthy	-1.42381	10.9717	68.4998	3.42453e-11	3.49675e-08
TPT1	COVID_G2G3 vs Healthy	-1.08657	12.1091	68.1202	3.72901e-11	3.49675e-08
RPL4	COVID_G2G3 vs Healthy	-1.19685	9.41984	62.3894	1.39554e-10	1.14504e-07
MRPS18C	COVID_G2G3 vs Healthy	1.08869	6.28597	61.4593	1.74135e-10	1.27002e-07
SIGLEC1	COVID_G2G3 vs Healthy	4.64718	6.64046	60.1096	2.43391e-10	1.59762e-07
RPL6	COVID_G2G3 vs Healthy	-1.06185	10.6869	58.5474	3.51081e-10	2.08997e-07
RPL5	COVID_G2G3 vs Healthy	-1.41419	9.97519	57.3915	4.6634e-10	2.08997e-07
LY96	COVID_G2G3 vs Healthy	0.979752	7.20502	57.3186	4.74912e-10	2.08997e-07
SNHG29	COVID_G2G3 vs Healthy	-1.32064	8.06159	57.0178	5.11532e-10	2.08997e-07
RPL9	COVID_G2G3 vs Healthy	-0.978795	10.7985	56.9181	5.24298e-10	2.08997e-07
HIST2H2BE	COVID_G2G3 vs Healthy	2.00526	3.79042	56.8821	5.25977e-10	2.08997e-07
EEF1G	COVID_G2G3 vs Healthy	-1.07802	9.33953	56.6241	5.64005e-10	2.08997e-07
SORL1	COVID_G2G3 vs Healthy	-1.19209	7.30645	56.0701	6.47671e-10	2.08997e-07
CCT6A	COVID_G2G3 vs Healthy	-0.599722	6.55067	55.9585	6.66147e-10	2.08997e-07
RPS23	COVID_G2G3 vs Healthy	-0.947627	11.0372	55.8829	6.78592e-10	2.08997e-07
EIF3E	COVID_G2G3 vs Healthy	-0.89159	8.44908	55.7634	6.99237e-10	2.08997e-07
IFI27	COVID_G2G3 vs Healthy	10.0656	9.59102	54.5632	7.00479e-10	2.08997e-07
ATP13A1	COVID_G2G3 vs Healthy	0.985247	5.21501	54.9411	8.63223e-10	2.46356e-07
IFITM3	COVID_G2G3 vs Healthy	3.91463	10.4524	54.5798	9.42331e-10	2.56945e-07
E2F2	COVID_G2G3 vs Healthy	2.70823	3.21048	53.6408	1.01289e-09	2.56945e-07
RPS27A	COVID_G2G3 vs Healthy	-0.888452	10.9552	54.2764	1.01776e-09	2.56945e-07
OASL	COVID_G2G3 vs Healthy	3.4293	6.1349	53.9342	1.11556e-09	2.71205e-07
LY6E	COVID_G2G3 vs Healthy	2.89459	9.32369	53.7538	1.16282e-09	2.72599e-07
HSH2D	COVID_G2G3 vs Healthy	1.56197	5.67391	53.5388	1.23146e-09	2.78733e-07
CALML4	COVID_G2G3 vs Healthy	0.896624	5.25792	53.3566	1.29089e-09	2.78757e-07
EIF3H	COVID_G2G3 vs Healthy	-0.635842	7.99258	53.2691	1.31649e-09	2.78757e-07
RBX1	COVID_G2G3 vs Healthy	0.718133	7.74782	52.8827	1.45412e-09	2.98276e-07
RPL7	COVID_G2G3 vs Healthy	-1.07822	10.2703	52.2569	1.7092e-09	3.1806e-07
EIF2D	COVID_G2G3 vs Healthy	-0.996886	3.74653	52.1884	1.76462e-09	3.1806e-07
RPLP0	COVID_G2G3 vs Healthy	-1.42088	9.41412	52.118	1.77195e-09	3.1806e-07
IFITM2	COVID_G2G3 vs Healthy	2.28704	9.68944	52.087	1.78627e-09	3.1806e-07
RPL15	COVID_G2G3 vs Healthy	-0.92974	10.8388	52.0728	1.79284e-09	3.1806e-07
QARS	COVID_G2G3 vs Healthy	-0.958721	5.63134	51.6044	2.02745e-09	3.48064e-07
IFI44	COVID_G2G3 vs Healthy	3.08192	7.52732	51.5285	2.06802e-09	3.48064e-07
RAB10	COVID_G2G3 vs Healthy	0.618604	7.54159	51.2338	2.23167e-09	3.5372e-07
ADI1	COVID_G2G3 vs Healthy	-0.536873	6.08353	51.1847	2.26149e-09	3.5372e-07
XAF1	COVID_G2G3 vs Healthy	2.28583	8.62302	51.0901	2.31712e-09	3.5372e-07
RPS8	COVID_G2G3 vs Healthy	-0.937399	11.1136	51.0784	2.32398e-09	3.5372e-07
PABPC1	COVID_G2G3 vs Healthy	-0.955875	10.2811	51.0019	2.37106e-09	3.5372e-07
IFI44L	COVID_G2G3 vs Healthy	4.1234	8.98668	50.8253	2.48459e-09	3.62419e-07
CTSL	COVID_G2G3 vs Healthy	2.14947	5.12743	50.647	2.61726e-09	3.63206e-07
RPL13	COVID_G2G3 vs Healthy	-0.868213	11.8308	50.5931	2.6402e-09	3.63206e-07
RPS6	COVID_G2G3 vs Healthy	-1.09914	10.6567	50.5704	2.65598e-09	3.63206e-07
BTF3	COVID_G2G3 vs Healthy	-0.712329	9.15084	50.2625	2.8809e-09	3.77848e-07
RPS4X	COVID_G2G3 vs Healthy	-1.07273	10.5311	50.1606	2.95954e-09	3.77848e-07
EPSTI1	COVID_G2G3 vs Healthy	2.61383	7.82461	50.1454	2.97234e-09	3.77848e-07
EIF3F	COVID_G2G3 vs Healthy	-0.86316	7.78442	50.118	2.99331e-09	3.77848e-07
PTPRO	COVID_G2G3 vs Healthy	1.49551	3.51588	49.64	3.30375e-09	4.09166e-07
KLHDC7B	COVID_G2G3 vs Healthy	3.22863	4.7675	49.4819	3.59861e-09	4.37431e-07
RPL3	COVID_G2G3 vs Healthy	-1.28029	10.2969	49.3436	3.67704e-09	4.38838e-07
PLAC8	COVID_G2G3 vs Healthy	3.1046	8.59354	49.2453	3.77529e-09	4.42518e-07
RPL10A	COVID_G2G3 vs Healthy	-1.09696	9.9542	49.1731	3.84833e-09	4.43165e-07
RTP4	COVID_G2G3 vs Healthy	2.20934	3.791	49.0115	3.96924e-09	4.49209e-07
CSDE1	COVID_G2G3 vs Healthy	-0.531212	8.04276	48.9405	4.09565e-09	4.50745e-07
DDX60	COVID_G2G3 vs Healthy	2.16162	5.91977	48.9322	4.12016e-09	4.50745e-07
IFI6	COVID_G2G3 vs Healthy	3.7402	9.26688	48.7229	4.34192e-09	4.67219e-07
CTDSP2	COVID_G2G3 vs Healthy	-0.560636	6.06992	48.3381	4.8177e-09	5.10055e-07
HIST1H1E	COVID_G2G3 vs Healthy	1.63178	6.00789	48.2543	4.95453e-09	5.16214e-07
NOP53	COVID_G2G3 vs Healthy	-0.827893	7.66535	48.1089	5.12235e-09	5.25016e-07
OTOF	COVID_G2G3 vs Healthy	6.81053	4.93003	45.3638	5.19897e-09	5.25016e-07
EIF2S3	COVID_G2G3 vs Healthy	-0.577531	7.77831	47.9965	5.28037e-09	5.25156e-07
RPL21	COVID_G2G3 vs Healthy	-0.823669	11.0125	47.8529	5.48928e-09	5.3077e-07
RPL22	COVID_G2G3 vs Healthy	-0.782425	10.081	47.8467	5.49854e-09	5.3077e-07
RPL18	COVID_G2G3 vs Healthy	-0.699785	10.7386	47.3056	6.36898e-09	6.05883e-07
RPL7A	COVID_G2G3 vs Healthy	-0.884757	10.6145	47.2174	6.52388e-09	6.11754e-07
CCNY	COVID_G2G3 vs Healthy	-0.67828	7.02943	47.1516	6.64314e-09	6.14163e-07
PCBP2	COVID_G2G3 vs Healthy	-0.679871	8.42318	46.9623	6.9943e-09	6.37647e-07
RPL10	COVID_G2G3 vs Healthy	-0.975091	11.8131	46.716	7.48196e-09	6.72762e-07
MPST	COVID_G2G3 vs Healthy	-0.818016	5.14991	46.2306	8.56178e-09	7.52088e-07
RPLP1	COVID_G2G3 vs Healthy	-0.821989	12.1806	46.1861	8.65444e-09	7.52088e-07
DYM	COVID_G2G3 vs Healthy	-0.587262	4.86377	46.1742	8.7079e-09	7.52088e-07
USP18	COVID_G2G3 vs Healthy	4.70677	4.84248	45.6443	9.55972e-09	8.14935e-07
RPS7	COVID_G2G3 vs Healthy	-0.771494	10.6275	45.7249	9.83002e-09	8.27234e-07
RPS2	COVID_G2G3 vs Healthy	-0.946158	11.4786	45.6578	1.00143e-08	8.32073e-07
SP110	COVID_G2G3 vs Healthy	1.30353	7.76629	45.4805	1.05203e-08	8.63188e-07
MPRIP	COVID_G2G3 vs Healthy	-0.983028	4.67314	45.356	1.09374e-08	8.86335e-07
IFIH1	COVID_G2G3 vs Healthy	2.15142	6.46136	45.2043	1.13733e-08	9.10423e-07
RPS13	COVID_G2G3 vs Healthy	-0.732541	11.1518	45.0514	1.18525e-08	9.27764e-07
SNRNP200	COVID_G2G3 vs Healthy	-0.579651	5.69309	45.0124	1.19942e-08	9.27764e-07
SPI1	COVID_G2G3 vs Healthy	0.482705	8.96296	45.0029	1.2014e-08	9.27764e-07
MX1	COVID_G2G3 vs Healthy	2.89003	8.58825	44.9166	1.23086e-08	9.3946e-07
RPS16	COVID_G2G3 vs Healthy	-0.776864	10.5783	44.7226	1.29921e-08	9.64622e-07
EIF3M	COVID_G2G3 vs Healthy	-0.583791	7.55056	44.6697	1.31873e-08	9.64622e-07
CYBRD1	COVID_G2G3 vs Healthy	-1.62303	4.29075	44.7057	1.31954e-08	9.64622e-07
EIF2AK2	COVID_G2G3 vs Healthy	1.84038	7.58014	44.6598	1.32261e-08	9.64622e-07
RPS14	COVID_G2G3 vs Healthy	-0.816922	11.3645	44.5215	1.3745e-08	9.91452e-07
RGL1	COVID_G2G3 vs Healthy	2.76517	3.71604	44.1097	1.39812e-08	9.97525e-07
CMPK2	COVID_G2G3 vs Healthy	2.8948	6.3871	44.0297	1.58444e-08	1.11103e-06
KIAA1958	COVID_G2G3 vs Healthy	1.70726	4.76914	44.0173	1.59921e-08	1.11103e-06
MYL12B	COVID_G2G3 vs Healthy	0.42104	8.81369	43.9636	1.60798e-08	1.11103e-06
SAMD9	COVID_G2G3 vs Healthy	1.89489	7.32694	43.6647	1.75054e-08	1.18632e-06
RACK1	COVID_G2G3 vs Healthy	-0.784062	10.2757	43.6576	1.75309e-08	1.18632e-06
RPL8	COVID_G2G3 vs Healthy	-0.697467	10.5638	43.5641	1.80011e-08	1.2026e-06
PSMB3	COVID_G2G3 vs Healthy	0.588739	7.96512	43.5277	1.81886e-08	1.2026e-06
TRPS1	COVID_G2G3 vs Healthy	-0.689316	6.28576	43.5035	1.83211e-08	1.2026e-06
PLSCR1	COVID_G2G3 vs Healthy	1.48575	8.00058	43.3636	1.90562e-08	1.23846e-06
IGFLR1	COVID_G2G3 vs Healthy	0.932568	6.3073	43.1376	2.03264e-08	1.29722e-06
UXT	COVID_G2G3 vs Healthy	-0.509751	6.95517	43.1301	2.03646e-08	1.29722e-06
SLC25A5	COVID_G2G3 vs Healthy	-0.890413	7.9554	43.0973	2.05532e-08	1.29722e-06
EIF1	COVID_G2G3 vs Healthy	-0.683211	11.2515	43.026	2.09738e-08	1.31116e-06
CRTAP	COVID_G2G3 vs Healthy	-0.795526	6.85608	42.9743	2.12895e-08	1.31834e-06
H2AFJ	COVID_G2G3 vs Healthy	1.07057	7.03944	42.8166	2.22689e-08	1.36611e-06
PRKX	COVID_G2G3 vs Healthy	-0.833212	5.61795	42.3223	2.56721e-08	1.56029e-06
SNRPB2	COVID_G2G3 vs Healthy	0.417192	6.83412	42.2274	2.6362e-08	1.58752e-06
RPS24	COVID_G2G3 vs Healthy	-0.700037	11.6375	41.9624	2.84452e-08	1.6974e-06
ZBP1	COVID_G2G3 vs Healthy	3.06392	4.81808	41.7602	3.0373e-08	1.77589e-06
KIN	COVID_G2G3 vs Healthy	0.588206	5.24742	41.7395	3.04075e-08	1.77589e-06
IFITM1	COVID_G2G3 vs Healthy	6.06966	7.6514	41.5808	3.05721e-08	1.77589e-06
PARP9	COVID_G2G3 vs Healthy	1.88929	7.17594	41.4417	3.3077e-08	1.90454e-06
IFI16	COVID_G2G3 vs Healthy	1.16537	8.59107	41.3263	3.41903e-08	1.95152e-06
NACA	COVID_G2G3 vs Healthy	-0.618435	10.6776	41.2955	3.44962e-08	1.95201e-06
HADHA	COVID_G2G3 vs Healthy	-0.475851	7.30591	41.1431	3.60612e-08	2.02313e-06
PABPN1	COVID_G2G3 vs Healthy	-0.50917	6.6893	41.0661	3.68823e-08	2.05166e-06
RPS11	COVID_G2G3 vs Healthy	-0.685467	10.7281	40.8301	3.94989e-08	2.17874e-06
IRF7	COVID_G2G3 vs Healthy	2.09561	7.46376	40.5419	4.2978e-08	2.3509e-06
SEC11A	COVID_G2G3 vs Healthy	-0.574486	7.96799	40.5048	4.34403e-08	2.35655e-06
EPHB2	COVID_G2G3 vs Healthy	1.90888	3.9702	40.3369	4.58618e-08	2.46751e-06
RHOG	COVID_G2G3 vs Healthy	0.571779	8.11808	40.1856	4.77036e-08	2.54206e-06
STT3B	COVID_G2G3 vs Healthy	-0.502254	6.54239	40.1638	4.80219e-08	2.54206e-06
COMMD6	COVID_G2G3 vs Healthy	-0.529652	8.22406	40.0892	4.9075e-08	2.57703e-06
OAS2	COVID_G2G3 vs Healthy	2.207	7.29074	39.9367	5.13487e-08	2.67502e-06
PRKDC	COVID_G2G3 vs Healthy	-0.807025	6.02534	39.8269	5.3047e-08	2.74174e-06
CALM3	COVID_G2G3 vs Healthy	0.629817	7.53203	39.7965	5.34971e-08	2.7434e-06
RPL26	COVID_G2G3 vs Healthy	-0.725792	11.525	39.6324	5.61501e-08	2.85713e-06
RPL17	COVID_G2G3 vs Healthy	-0.794913	10.9391	39.3896	6.0335e-08	3.04646e-06
RPL13A	COVID_G2G3 vs Healthy	-0.824402	10.9426	39.3104	6.17686e-08	3.08438e-06
IFIT1	COVID_G2G3 vs Healthy	4.1411	7.22255	39.3061	6.20259e-08	3.08438e-06
RIPK3	COVID_G2G3 vs Healthy	1.14843	3.80481	39.3057	6.25218e-08	3.08566e-06
CCNI	COVID_G2G3 vs Healthy	-0.502518	8.86435	38.8502	7.08322e-08	3.46972e-06
RRAS	COVID_G2G3 vs Healthy	1.07265	6.20649	38.6902	7.43274e-08	3.61396e-06
STAC3	COVID_G2G3 vs Healthy	1.07324	5.73288	38.6419	7.5452e-08	3.64167e-06
TRIR	COVID_G2G3 vs Healthy	-0.359472	7.92048	38.6071	7.61695e-08	3.64946e-06
PRPF8	COVID_G2G3 vs Healthy	-0.460805	6.01642	38.551	7.74941e-08	3.68602e-06
NEXN	COVID_G2G3 vs Healthy	2.93908	5.10222	38.4055	8.16581e-08	3.85614e-06
HERC6	COVID_G2G3 vs Healthy	2.0831	4.17369	38.2454	8.45949e-08	3.96629e-06
RPL34	COVID_G2G3 vs Healthy	-0.67136	11.4109	38.1779	8.66263e-08	4.03273e-06
SH2B2	COVID_G2G3 vs Healthy	1.35104	4.42599	38.1188	8.87822e-08	4.10399e-06
TRIM34	COVID_G2G3 vs Healthy	0.986491	4.97748	37.9009	9.46479e-08	4.34454e-06
OAS1	COVID_G2G3 vs Healthy	1.8339	7.52373	37.6903	1.00358e-07	4.54586e-06
ATP10A	COVID_G2G3 vs Healthy	1.65778	3.82335	37.657	1.01216e-07	4.54586e-06
SAMD9L	COVID_G2G3 vs Healthy	2.19266	7.6061	37.6494	1.01618e-07	4.54586e-06
FAM168B	COVID_G2G3 vs Healthy	-0.833056	4.34473	37.6581	1.01804e-07	4.54586e-06
ISG15	COVID_G2G3 vs Healthy	3.4695	9.4832	37.5651	1.04215e-07	4.6221e-06
PHF11	COVID_G2G3 vs Healthy	0.964365	6.46465	37.5411	1.05019e-07	4.62649e-06
VPS51	COVID_G2G3 vs Healthy	-0.706465	5.46482	37.4747	1.07187e-07	4.69049e-06
TMA7	COVID_G2G3 vs Healthy	-0.53846	8.55684	37.3621	1.10827e-07	4.81769e-06
DRAP1	COVID_G2G3 vs Healthy	0.872063	7.74871	37.1354	1.18733e-07	5.12739e-06
MMGT1	COVID_G2G3 vs Healthy	-0.59125	5.06524	37.0986	1.20336e-07	5.16264e-06
IPO5	COVID_G2G3 vs Healthy	-1.04388	4.59573	37.0692	1.21622e-07	5.18396e-06
MRPL22	COVID_G2G3 vs Healthy	0.646391	4.917	36.9817	1.2473e-07	5.25557e-06
RPL24	COVID_G2G3 vs Healthy	-0.568373	10.1617	36.9688	1.24904e-07	5.25557e-06
ST13	COVID_G2G3 vs Healthy	-0.667562	6.64308	36.8664	1.28891e-07	5.34236e-06
PSMA6	COVID_G2G3 vs Healthy	0.646445	7.56527	36.8653	1.28917e-07	5.34236e-06
OIP5-AS1	COVID_G2G3 vs Healthy	-0.600616	6.15088	36.8541	1.29408e-07	5.34236e-06
SRSF6	COVID_G2G3 vs Healthy	-0.675285	6.7091	36.7905	1.31911e-07	5.41165e-06
RSAD2	COVID_G2G3 vs Healthy	4.1263	6.99124	36.6398	1.38664e-07	5.65336e-06
HGSNAT	COVID_G2G3 vs Healthy	-0.708442	5.26418	36.5115	1.43823e-07	5.82237e-06
TDRD7	COVID_G2G3 vs Healthy	1.1082	4.53684	36.5142	1.44584e-07	5.82237e-06
FBL	COVID_G2G3 vs Healthy	-0.932465	5.78049	36.4089	1.48317e-07	5.93629e-06
RPS3	COVID_G2G3 vs Healthy	-0.722016	10.6301	36.3484	1.51001e-07	5.99115e-06
SHISA5	COVID_G2G3 vs Healthy	0.865772	6.80496	36.3382	1.51513e-07	5.99115e-06
RPS15A	COVID_G2G3 vs Healthy	-0.633438	11.0017	36.2777	1.54318e-07	6.0324e-06
DHX58	COVID_G2G3 vs Healthy	1.92158	4.55395	36.3045	1.54394e-07	6.0324e-06
IFIT5	COVID_G2G3 vs Healthy	2.08804	4.78209	36.1123	1.60784e-07	6.24487e-06
PARP12	COVID_G2G3 vs Healthy	1.49453	5.78777	35.99	1.68847e-07	6.46017e-06
NONO	COVID_G2G3 vs Healthy	-0.42825	6.72486	35.9807	1.69124e-07	6.46017e-06
MS4A4A	COVID_G2G3 vs Healthy	2.69442	5.39262	36.0003	1.69279e-07	6.46017e-06
IFIT3	COVID_G2G3 vs Healthy	3.75454	7.51964	35.8894	1.74064e-07	6.60436e-06
RBM4	COVID_G2G3 vs Healthy	-0.434143	6.89299	35.8513	1.76002e-07	6.63953e-06
RNASE2	COVID_G2G3 vs Healthy	2.71444	6.91227	35.7764	1.80219e-07	6.7476e-06
OSTC	COVID_G2G3 vs Healthy	-0.590307	6.49763	35.7622	1.80923e-07	6.7476e-06
OAS3	COVID_G2G3 vs Healthy	2.50259	6.74017	35.7328	1.82656e-07	6.77376e-06
SLC25A6	COVID_G2G3 vs Healthy	-0.808384	9.18665	35.4962	1.96415e-07	7.24307e-06
SP100	COVID_G2G3 vs Healthy	0.763316	7.83008	35.3973	2.02547e-07	7.4275e-06
JMJD1C	COVID_G2G3 vs Healthy	-0.632261	8.16846	35.3444	2.0589e-07	7.50811e-06
NUDT3	COVID_G2G3 vs Healthy	-0.659154	6.24375	35.2729	2.10601e-07	7.63749e-06
GMPR	COVID_G2G3 vs Healthy	3.24711	4.15758	35.0837	2.21975e-07	8.00573e-06
TTC3	COVID_G2G3 vs Healthy	-0.918852	6.41231	35.0604	2.24978e-07	8.06971e-06
MYL12A	COVID_G2G3 vs Healthy	0.673717	9.35446	34.9263	2.34518e-07	8.36619e-06
ST3GAL2	COVID_G2G3 vs Healthy	0.630392	4.99533	34.8645	2.39723e-07	8.50563e-06
PSMC2	COVID_G2G3 vs Healthy	0.693077	5.35945	34.8243	2.4253e-07	8.53681e-06
MAIP1	COVID_G2G3 vs Healthy	0.930387	3.92488	34.84	2.43203e-07	8.53681e-06
RPL23A	COVID_G2G3 vs Healthy	-0.657759	10.5011	34.7543	2.47468e-07	8.64031e-06
SLU7	COVID_G2G3 vs Healthy	0.485727	6.21158	34.6836	2.53101e-07	8.79025e-06
HNRNPH3	COVID_G2G3 vs Healthy	-0.401652	6.7591	34.5376	2.64891e-07	9.15129e-06
RPS5	COVID_G2G3 vs Healthy	-0.859064	9.23603	34.5153	2.667e-07	9.16555e-06
NOSIP	COVID_G2G3 vs Healthy	0.620517	5.87159	34.4967	2.68423e-07	9.1767e-06
ARHGAP25	COVID_G2G3 vs Healthy	0.758829	5.50955	34.4635	2.7152e-07	9.20243e-06
KRT10	COVID_G2G3 vs Healthy	-1.12158	5.9964	34.4541	2.71979e-07	9.20243e-06
ADAR	COVID_G2G3 vs Healthy	1.01219	7.75401	34.2651	2.88542e-07	9.71276e-06
IFI35	COVID_G2G3 vs Healthy	1.83699	6.99683	34.1918	2.95318e-07	9.89015e-06
ORMDL2	COVID_G2G3 vs Healthy	0.612861	5.21515	34.1397	3.0057e-07	1.00149e-05
TRIM22	COVID_G2G3 vs Healthy	1.58751	7.7099	33.9891	3.14774e-07	1.04352e-05
RENBP	COVID_G2G3 vs Healthy	0.615857	4.59678	33.9448	3.20118e-07	1.05591e-05
NDUFA4	COVID_G2G3 vs Healthy	0.386282	8.29214	33.8778	3.26009e-07	1.06996e-05
ALAS1	COVID_G2G3 vs Healthy	0.972771	4.3789	33.8408	3.32132e-07	1.08463e-05
TAF15	COVID_G2G3 vs Healthy	-0.516906	6.03793	33.7565	3.38884e-07	1.1012e-05
BLOC1S1	COVID_G2G3 vs Healthy	0.657902	8.19569	33.6717	3.4799e-07	1.12522e-05
YBX3	COVID_G2G3 vs Healthy	-0.876482	8.46108	33.5117	3.66093e-07	1.17796e-05
CHMP5	COVID_G2G3 vs Healthy	1.25108	6.98402	33.376	3.82318e-07	1.22417e-05
EIF3D	COVID_G2G3 vs Healthy	-0.521565	6.98068	33.3563	3.84658e-07	1.22568e-05
MT-CYB	COVID_G2G3 vs Healthy	-0.999596	12.0584	33.2823	3.9379e-07	1.24872e-05
TOMM6	COVID_G2G3 vs Healthy	-0.48213	7.57941	33.0514	4.23904e-07	1.33281e-05
SETD7	COVID_G2G3 vs Healthy	-0.709661	5.20994	33.0511	4.2437e-07	1.33281e-05
RPL18A	COVID_G2G3 vs Healthy	-0.607067	11.078	32.9735	4.34558e-07	1.3583e-05
C20orf194	COVID_G2G3 vs Healthy	-0.762445	4.26411	32.9284	4.43158e-07	1.37862e-05
IKBKE	COVID_G2G3 vs Healthy	0.980816	4.76162	32.7659	4.65834e-07	1.44233e-05
DANCR	COVID_G2G3 vs Healthy	-1.66533	3.35084	32.588	4.98645e-07	1.53667e-05
LMNB1	COVID_G2G3 vs Healthy	1.35939	6.01338	32.5174	5.0351e-07	1.54441e-05
VPS29	COVID_G2G3 vs Healthy	0.396521	7.44001	32.4711	5.10542e-07	1.5587e-05
DDX58	COVID_G2G3 vs Healthy	1.87623	6.33402	32.3948	5.23853e-07	1.59193e-05
UBE2L3	COVID_G2G3 vs Healthy	0.44855	7.16295	32.3461	5.31525e-07	1.6078e-05
EIF3A	COVID_G2G3 vs Healthy	-0.41914	8.20559	32.3219	5.35647e-07	1.61284e-05
SERPING1	COVID_G2G3 vs Healthy	3.92191	5.42276	32.2714	5.47982e-07	1.63721e-05
CAPG	COVID_G2G3 vs Healthy	0.689619	8.11921	32.247	5.4873e-07	1.63721e-05
ATL3	COVID_G2G3 vs Healthy	-0.515067	5.27992	32.1215	5.72119e-07	1.69927e-05
ADAM15	COVID_G2G3 vs Healthy	-0.843595	5.64172	32.0398	5.86984e-07	1.73557e-05
LGALS1	COVID_G2G3 vs Healthy	0.699869	10.69	31.9334	6.0724e-07	1.78741e-05
CREG1	COVID_G2G3 vs Healthy	0.705862	7.18821	31.7752	6.39253e-07	1.87324e-05
TRIM69	COVID_G2G3 vs Healthy	1.39519	5.05338	31.6864	6.59398e-07	1.91613e-05
GPR65	COVID_G2G3 vs Healthy	0.862865	6.26885	31.6745	6.60735e-07	1.91613e-05
HELZ2	COVID_G2G3 vs Healthy	1.62112	5.64927	31.668	6.62647e-07	1.91613e-05
RPL35A	COVID_G2G3 vs Healthy	-0.557987	10.8074	31.5865	6.79585e-07	1.95535e-05
KLHDC3	COVID_G2G3 vs Healthy	-0.565958	5.0129	31.5783	6.82168e-07	1.95535e-05
GPANK1	COVID_G2G3 vs Healthy	0.745475	4.53333	31.5603	6.88886e-07	1.96602e-05
TCN2	COVID_G2G3 vs Healthy	2.174	5.0782	31.4246	7.19736e-07	2.04517e-05
PML	COVID_G2G3 vs Healthy	1.53868	5.49157	31.2911	7.49548e-07	2.12071e-05
HP1BP3	COVID_G2G3 vs Healthy	-0.514167	7.03641	31.1967	7.71734e-07	2.1741e-05
SLC4A7	COVID_G2G3 vs Healthy	-0.887005	4.66416	31.1881	7.76429e-07	2.17762e-05
HECTD1	COVID_G2G3 vs Healthy	-0.440781	6.19007	31.1663	7.79617e-07	2.17762e-05
TNFSF13B	COVID_G2G3 vs Healthy	0.881913	8.80708	31.1503	7.83443e-07	2.17903e-05
PRKAR2A	COVID_G2G3 vs Healthy	-0.61557	6.03778	31.0314	8.14833e-07	2.2491e-05
STRAP	COVID_G2G3 vs Healthy	-0.446173	5.88688	31.0288	8.15487e-07	2.2491e-05
CTNNB1	COVID_G2G3 vs Healthy	-0.7314	7.58364	30.9848	8.27094e-07	2.26967e-05
RPL27	COVID_G2G3 vs Healthy	-0.61979	10.0276	30.9744	8.29861e-07	2.26967e-05
RPS17	COVID_G2G3 vs Healthy	-0.726224	9.41322	30.943	8.38452e-07	2.28365e-05
PABPC4	COVID_G2G3 vs Healthy	-0.92775	6.3759	30.8462	8.65689e-07	2.34809e-05
RPL29	COVID_G2G3 vs Healthy	-0.548437	10.8618	30.8116	8.75381e-07	2.36461e-05
TIMP1	COVID_G2G3 vs Healthy	0.717705	8.41212	30.7761	8.8567e-07	2.36852e-05
HSPA8	COVID_G2G3 vs Healthy	-1.13934	8.19495	30.7734	8.86444e-07	2.36852e-05
PSMA3	COVID_G2G3 vs Healthy	0.561448	6.47444	30.7699	8.87654e-07	2.36852e-05
VHL	COVID_G2G3 vs Healthy	-0.485916	5.28333	30.396	1.00461e-06	2.66974e-05
RNF181	COVID_G2G3 vs Healthy	0.414563	6.8464	30.112	1.10269e-06	2.91857e-05
HERC5	COVID_G2G3 vs Healthy	2.8754	6.42397	30.0974	1.10959e-06	2.92503e-05
LILRB2	COVID_G2G3 vs Healthy	0.696681	8.17256	29.9877	1.14897e-06	3.0073e-05
S100A4	COVID_G2G3 vs Healthy	0.409016	12.1632	29.985	1.14996e-06	3.0073e-05
MAZ	COVID_G2G3 vs Healthy	-0.569818	6.08345	29.9154	1.17718e-06	3.06626e-05
MYD88	COVID_G2G3 vs Healthy	0.582365	7.15025	29.8801	1.19088e-06	3.08969e-05
NT5C3A	COVID_G2G3 vs Healthy	2.10617	6.48323	29.8448	1.20547e-06	3.11523e-05
CSF3R	COVID_G2G3 vs Healthy	-0.589715	8.61802	29.8245	1.21296e-06	3.1223e-05
SPATS2L	COVID_G2G3 vs Healthy	2.3201	4.98046	29.7537	1.24863e-06	3.20156e-05
TOR1B	COVID_G2G3 vs Healthy	1.45788	4.88871	29.7198	1.26016e-06	3.21857e-05
MX2	COVID_G2G3 vs Healthy	1.78248	8.14421	29.6482	1.28634e-06	3.27268e-05
PSMA3-AS1	COVID_G2G3 vs Healthy	-0.418784	6.73666	29.6074	1.30404e-06	3.30492e-05
NT5DC1	COVID_G2G3 vs Healthy	-1.00509	4.13959	29.5871	1.32031e-06	3.33327e-05
TGS1	COVID_G2G3 vs Healthy	0.501162	4.81613	29.5047	1.35265e-06	3.40184e-05
ARID5B	COVID_G2G3 vs Healthy	1.85934	4.02674	29.5047	1.35882e-06	3.40431e-05
MNDA	COVID_G2G3 vs Healthy	0.577197	10.9856	29.4689	1.36556e-06	3.40818e-05
LGALS3BP	COVID_G2G3 vs Healthy	3.32811	5.40968	29.4693	1.37267e-06	3.41295e-05
ROMO1	COVID_G2G3 vs Healthy	0.646241	6.61691	29.3946	1.40015e-06	3.46815e-05
CIR1	COVID_G2G3 vs Healthy	0.624488	6.8669	29.3052	1.4426e-06	3.55985e-05
NOL4L	COVID_G2G3 vs Healthy	0.971689	3.59018	29.122	1.54379e-06	3.79528e-05
ALPK1	COVID_G2G3 vs Healthy	0.847665	5.27762	29.0907	1.55326e-06	3.79637e-05
MAP3K20	COVID_G2G3 vs Healthy	-0.66746	5.67672	29.0811	1.55579e-06	3.79637e-05
SNX20	COVID_G2G3 vs Healthy	0.704576	5.72683	29.0243	1.58567e-06	3.85494e-05
SF3B6	COVID_G2G3 vs Healthy	0.320514	7.03894	28.9771	1.61032e-06	3.90043e-05
MT-ND5	COVID_G2G3 vs Healthy	-0.695847	10.6536	28.8996	1.65271e-06	3.96386e-05
SHFL	COVID_G2G3 vs Healthy	1.04456	5.70331	28.8927	1.65785e-06	3.96386e-05
ZCCHC10	COVID_G2G3 vs Healthy	0.572117	5.18669	28.8911	1.65962e-06	3.96386e-05
NCOA7	COVID_G2G3 vs Healthy	1.51853	5.79645	28.8894	1.66067e-06	3.96386e-05
USP22	COVID_G2G3 vs Healthy	-0.461505	5.5789	28.8186	1.6994e-06	4.0278e-05
MT-CO3	COVID_G2G3 vs Healthy	-0.924017	13.1127	28.8163	1.69973e-06	4.0278e-05
KIF22	COVID_G2G3 vs Healthy	-1.07464	4.40612	28.7377	1.75044e-06	4.11667e-05
FCGR3A	COVID_G2G3 vs Healthy	1.95706	6.59529	28.7297	1.75105e-06	4.11667e-05
RBM14	COVID_G2G3 vs Healthy	-0.620816	5.22805	28.7231	1.75604e-06	4.11667e-05
MRPL27	COVID_G2G3 vs Healthy	0.585481	5.62228	28.6865	1.77687e-06	4.15066e-05
IFI30	COVID_G2G3 vs Healthy	0.690885	10.5512	28.6387	1.80461e-06	4.20051e-05
APOBEC3A	COVID_G2G3 vs Healthy	2.28375	8.70363	28.561	1.85269e-06	4.2972e-05
HSPA9	COVID_G2G3 vs Healthy	-0.417913	6.80706	28.3676	1.97819e-06	4.57213e-05
BX284668.5	COVID_G2G3 vs Healthy	-1.13209	4.33217	28.3612	1.98987e-06	4.58298e-05
RPL23	COVID_G2G3 vs Healthy	-0.706986	10.0586	28.2676	2.04617e-06	4.69617e-05
ETFB	COVID_G2G3 vs Healthy	0.426513	6.41078	28.2213	2.07902e-06	4.75495e-05
CNP	COVID_G2G3 vs Healthy	0.973473	4.92214	28.1725	2.11792e-06	4.82708e-05
RPS18	COVID_G2G3 vs Healthy	-0.70969	11.4264	28.13	2.14402e-06	4.86966e-05
TPCN1	COVID_G2G3 vs Healthy	-0.871054	4.95748	28.1202	2.15363e-06	4.87463e-05
HRH2	COVID_G2G3 vs Healthy	0.730297	6.77248	28.0498	2.20373e-06	4.9709e-05
DDX60L	COVID_G2G3 vs Healthy	1.26971	7.06654	28.0008	2.24081e-06	5.03723e-05
AHNAK	COVID_G2G3 vs Healthy	-0.866411	9.75367	27.9845	2.25284e-06	5.04697e-05
NMI	COVID_G2G3 vs Healthy	1.04392	6.95607	27.8875	2.32885e-06	5.19952e-05
ZNFX1	COVID_G2G3 vs Healthy	0.874844	5.82843	27.8659	2.34707e-06	5.22242e-05
SIL1	COVID_G2G3 vs Healthy	0.6238	5.0774	27.8458	2.36496e-06	5.24447e-05
CLIC1	COVID_G2G3 vs Healthy	0.46327	9.55489	27.8162	2.38591e-06	5.27309e-05
OGFRL1	COVID_G2G3 vs Healthy	-0.651192	8.07311	27.7563	2.43523e-06	5.36405e-05
RPL32	COVID_G2G3 vs Healthy	-0.544764	11.443	27.6951	2.48667e-06	5.45903e-05
GPATCH11	COVID_G2G3 vs Healthy	-0.904342	4.06567	27.6373	2.54763e-06	5.57422e-05
GIMAP4	COVID_G2G3 vs Healthy	1.03161	8.39418	27.6135	2.55717e-06	5.57651e-05
SET	COVID_G2G3 vs Healthy	-0.44526	7.92158	27.5994	2.56954e-06	5.58491e-05
ISG20	COVID_G2G3 vs Healthy	2.634	6.0276	27.5241	2.63906e-06	5.7171e-05
MICAL2	COVID_G2G3 vs Healthy	-0.7943	5.50272	27.456	2.70066e-06	5.83128e-05
IMPDH2	COVID_G2G3 vs Healthy	-1.17951	4.33211	27.4386	2.72223e-06	5.8586e-05
PPM1K	COVID_G2G3 vs Healthy	1.33992	5.21745	27.4134	2.74638e-06	5.89125e-05
RBM3	COVID_G2G3 vs Healthy	-0.696134	8.21461	27.327	2.82101e-06	6.03164e-05
TPMT	COVID_G2G3 vs Healthy	0.767239	5.6644	27.2808	2.86782e-06	6.08984e-05
PIK3AP1	COVID_G2G3 vs Healthy	0.700318	7.34518	27.2773	2.86985e-06	6.08984e-05
MTF1	COVID_G2G3 vs Healthy	0.668434	5.73215	27.2725	2.87607e-06	6.08984e-05
C2	COVID_G2G3 vs Healthy	2.22154	4.06281	27.2696	2.90202e-06	6.12504e-05
RAE1	COVID_G2G3 vs Healthy	-0.752181	4.56481	27.233	2.92043e-06	6.13066e-05
MAVS	COVID_G2G3 vs Healthy	-0.70804	5.25347	27.2263	2.92336e-06	6.13066e-05
HNRNPA0	COVID_G2G3 vs Healthy	-0.474006	6.63851	27.1951	2.95225e-06	6.16844e-05
DELE1	COVID_G2G3 vs Healthy	-0.466157	5.12382	27.1896	2.96018e-06	6.16844e-05
TRIM21	COVID_G2G3 vs Healthy	0.942338	4.80116	27.1606	2.99939e-06	6.23037e-05
KAT6B	COVID_G2G3 vs Healthy	-0.554842	5.66221	27.1035	3.04802e-06	6.31142e-05
CMTR1	COVID_G2G3 vs Healthy	1.03591	4.18222	27.0744	3.09623e-06	6.39109e-05
RPL11	COVID_G2G3 vs Healthy	-0.50826	11.4342	26.936	3.22769e-06	6.64155e-05
APOBEC3G	COVID_G2G3 vs Healthy	1.00391	5.52797	26.861	3.31467e-06	6.79921e-05
TMEM63A	COVID_G2G3 vs Healthy	0.56596	4.38175	26.8301	3.3617e-06	6.87421e-05
PRKRA	COVID_G2G3 vs Healthy	-0.62734	4.19178	26.7748	3.4256e-06	6.98312e-05
MT2A	COVID_G2G3 vs Healthy	2.43228	8.4	26.7366	3.45824e-06	7.02784e-05
RPL28	COVID_G2G3 vs Healthy	0.51123	12.1633	26.7118	3.48794e-06	7.06631e-05
N4BP1	COVID_G2G3 vs Healthy	0.744189	6.15232	26.6997	3.50397e-06	7.07694e-05
JPT1	COVID_G2G3 vs Healthy	0.493632	6.95399	26.6315	3.5867e-06	7.2218e-05
ATOX1	COVID_G2G3 vs Healthy	0.764525	7.07107	26.6027	3.62266e-06	7.27191e-05
FCGR1A	COVID_G2G3 vs Healthy	1.63307	6.88508	26.5455	3.69558e-06	7.39566e-05
CFL1	COVID_G2G3 vs Healthy	0.372874	10.0927	26.5009	3.75275e-06	7.48725e-05
RPSA	COVID_G2G3 vs Healthy	-0.684992	9.33033	26.4725	3.78995e-06	7.49989e-05
PNRC1	COVID_G2G3 vs Healthy	-0.613172	9.07111	26.4711	3.79189e-06	7.49989e-05
BCAP29	COVID_G2G3 vs Healthy	-0.513768	5.06702	26.4728	3.79336e-06	7.49989e-05
SYPL1	COVID_G2G3 vs Healthy	-0.349272	5.59886	26.4253	3.85428e-06	7.59745e-05
RAB8A	COVID_G2G3 vs Healthy	0.55776	7.1074	26.3759	3.91971e-06	7.70328e-05
SUB1	COVID_G2G3 vs Healthy	0.286021	8.5933	26.3223	3.99336e-06	7.82461e-05
RPL19	COVID_G2G3 vs Healthy	-0.500822	11.2081	26.2703	4.0662e-06	7.93764e-05
UGGT1	COVID_G2G3 vs Healthy	-0.461703	5.21629	26.2667	4.07523e-06	7.93764e-05
GAS5	COVID_G2G3 vs Healthy	-1.0132	7.35617	26.2524	4.09191e-06	7.94653e-05
ZCCHC2	COVID_G2G3 vs Healthy	1.21994	6.04509	26.1589	4.23044e-06	8.19133e-05
NDUFB3	COVID_G2G3 vs Healthy	0.609649	7.0478	26.1301	4.27036e-06	8.2443e-05
DTX3L	COVID_G2G3 vs Healthy	1.21864	6.49268	26.121	4.28561e-06	8.24949e-05
MT-CO1	COVID_G2G3 vs Healthy	-0.71466	13.577	26.0978	4.31848e-06	8.28845e-05
GRN	COVID_G2G3 vs Healthy	0.591694	9.69472	26.0262	4.42786e-06	8.4736e-05
MT1F	COVID_G2G3 vs Healthy	1.51783	3.90277	26.0282	4.45165e-06	8.49438e-05
LGALS9	COVID_G2G3 vs Healthy	0.865929	7.74346	25.9348	4.57199e-06	8.69871e-05
UQCR10	COVID_G2G3 vs Healthy	0.401245	8.03031	25.8539	4.70326e-06	8.89783e-05
TRIM5	COVID_G2G3 vs Healthy	1.11675	4.90579	25.8572	4.71097e-06	8.89783e-05
LRPPRC	COVID_G2G3 vs Healthy	-0.685565	5.38889	25.8475	4.71731e-06	8.89783e-05
MT-ND2	COVID_G2G3 vs Healthy	-0.677994	11.7655	25.801	4.79121e-06	9.01132e-05
LAIR1	COVID_G2G3 vs Healthy	0.751484	6.21228	25.7736	4.83881e-06	9.07484e-05
POLR2F	COVID_G2G3 vs Healthy	0.500251	5.89146	25.7524	4.87536e-06	9.11734e-05
DDAH2	COVID_G2G3 vs Healthy	0.609076	5.43033	25.7214	4.93027e-06	9.19384e-05
CMTM3	COVID_G2G3 vs Healthy	-0.738137	6.1009	25.7012	4.96323e-06	9.2282e-05
RPS6KA3	COVID_G2G3 vs Healthy	-0.561519	6.88886	25.689	4.98399e-06	9.2282e-05
CD63	COVID_G2G3 vs Healthy	0.820932	8.77981	25.6847	4.99088e-06	9.2282e-05
RPL27A	COVID_G2G3 vs Healthy	-0.554825	10.4113	25.6509	5.05058e-06	9.31236e-05
EIF3B	COVID_G2G3 vs Healthy	-0.481067	5.99985	25.5737	5.19078e-06	9.54406e-05
EMC7	COVID_G2G3 vs Healthy	0.469376	5.77316	25.546	5.24219e-06	9.61165e-05
TRIM14	COVID_G2G3 vs Healthy	1.13835	5.6633	25.4153	5.49224e-06	0.000100421
CTSA	COVID_G2G3 vs Healthy	0.76251	7.22385	25.4025	5.51251e-06	0.000100511
TRIM26	COVID_G2G3 vs Healthy	0.611332	5.0579	25.3829	5.55861e-06	0.000101071
LSM4	COVID_G2G3 vs Healthy	-0.611929	6.16437	25.3557	5.60496e-06	0.000101632
SSB	COVID_G2G3 vs Healthy	0.768664	7.39001	25.3319	5.65158e-06	0.000102014
SLFN5	COVID_G2G3 vs Healthy	1.90071	6.30975	25.3309	5.65707e-06	0.000102014
IFIT2	COVID_G2G3 vs Healthy	3.07774	7.36437	25.2275	5.86531e-06	0.000105479
PTRHD1	COVID_G2G3 vs Healthy	-0.54463	5.91055	25.1882	5.94723e-06	0.00010656
MFAP1	COVID_G2G3 vs Healthy	0.712164	4.35853	25.1943	5.95785e-06	0.00010656
RPL14	COVID_G2G3 vs Healthy	-0.490881	10.311	25.1645	5.99546e-06	0.000106941
MT-ATP6	COVID_G2G3 vs Healthy	-0.776109	12.7287	25.1236	6.08294e-06	0.000108207
RPL30	COVID_G2G3 vs Healthy	-0.490667	11.3922	25.1053	6.12255e-06	0.000108617
RAB8B	COVID_G2G3 vs Healthy	0.478197	6.82797	25.0901	6.15631e-06	0.000108922
MLXIP	COVID_G2G3 vs Healthy	-0.461683	6.32762	25.0633	6.21563e-06	0.000109676
RNF213	COVID_G2G3 vs Healthy	1.01922	8.90489	25.0291	6.29012e-06	0.000110693
AC009950.1	COVID_G2G3 vs Healthy	1.23385	4.94267	25.0099	6.34643e-06	0.000111385
CCT4	COVID_G2G3 vs Healthy	-0.408943	6.1416	24.9646	6.43709e-06	0.000112675
COX5B	COVID_G2G3 vs Healthy	0.399839	8.55493	24.9223	6.53309e-06	0.000114051
UBA3	COVID_G2G3 vs Healthy	0.490542	6.04369	24.8818	6.63041e-06	0.000115443
MFNG	COVID_G2G3 vs Healthy	-0.529821	5.58368	24.8584	6.6854e-06	0.000116093
NAP1L1	COVID_G2G3 vs Healthy	-0.780132	8.34649	24.8051	6.81078e-06	0.000117325
BLVRA	COVID_G2G3 vs Healthy	0.94221	7.38578	24.8037	6.81467e-06	0.000117325
RPS21	COVID_G2G3 vs Healthy	-0.480892	10.1811	24.7994	6.82466e-06	0.000117325
POP4	COVID_G2G3 vs Healthy	0.391309	4.80785	24.8024	6.82786e-06	0.000117325
MT1X	COVID_G2G3 vs Healthy	1.26015	5.51946	24.7567	6.93659e-06	0.000118882
SNRNP35	COVID_G2G3 vs Healthy	0.533812	4.64736	24.7518	6.95851e-06	0.000118947
SP140	COVID_G2G3 vs Healthy	1.53459	4.11746	24.704	7.10048e-06	0.000121059
RUBCN	COVID_G2G3 vs Healthy	0.548137	4.8179	24.6528	7.20759e-06	0.000122566
IRF2	COVID_G2G3 vs Healthy	0.557892	6.5058	24.6223	7.27035e-06	0.000123314
ATP5PD	COVID_G2G3 vs Healthy	0.359727	7.62075	24.5118	7.56124e-06	0.000127917
H1F0	COVID_G2G3 vs Healthy	1.71094	5.47347	24.5031	7.60236e-06	0.000128283
TMEM123	COVID_G2G3 vs Healthy	0.98713	8.51905	24.458	7.7081e-06	0.000129733
IL13RA1	COVID_G2G3 vs Healthy	-0.876288	6.41803	24.3883	7.90384e-06	0.000132687
RSL24D1	COVID_G2G3 vs Healthy	-0.468749	7.11384	24.374	7.94333e-06	0.000132984
PATL1	COVID_G2G3 vs Healthy	0.722098	5.26307	24.3708	7.96202e-06	0.000132984
PRMT1	COVID_G2G3 vs Healthy	-0.545483	5.20677	24.3398	8.04526e-06	0.000134033
ATP5MD	COVID_G2G3 vs Healthy	0.422459	7.80755	24.3285	8.07333e-06	0.00013416
C17orf49	COVID_G2G3 vs Healthy	0.469533	6.55906	24.2803	8.21493e-06	0.000136169
ETV7	COVID_G2G3 vs Healthy	3.40962	3.70526	24.2296	8.32304e-06	0.000137613
CDC40	COVID_G2G3 vs Healthy	0.41187	6.75133	24.2276	8.37147e-06	0.000137755
HNRNPA1	COVID_G2G3 vs Healthy	-0.506016	8.65948	24.2265	8.3736e-06	0.000137755
BCLAF1	COVID_G2G3 vs Healthy	-0.450086	8.0721	24.1955	8.46749e-06	0.000138866
VDR	COVID_G2G3 vs Healthy	0.729141	4.36556	24.2003	8.48344e-06	0.000138866
MGME1	COVID_G2G3 vs Healthy	0.622801	4.59109	24.1908	8.50996e-06	0.000138954
HIST1H2AC	COVID_G2G3 vs Healthy	1.51336	4.23507	24.1729	8.57996e-06	0.000139452
SQOR	COVID_G2G3 vs Healthy	0.6568	7.05988	24.1579	8.58298e-06	0.000139452
PRDX1	COVID_G2G3 vs Healthy	0.384662	7.88361	24.1309	8.66599e-06	0.000140453
NPM1	COVID_G2G3 vs Healthy	-0.691383	7.96533	24.0387	8.95772e-06	0.000144824
SCO2	COVID_G2G3 vs Healthy	1.22206	7.95016	23.9506	9.24628e-06	0.000149122
SF1	COVID_G2G3 vs Healthy	-0.39038	7.48304	23.9381	9.28801e-06	0.000149428
GNAS	COVID_G2G3 vs Healthy	-0.455058	8.82128	23.9203	9.3476e-06	0.000150019
WSB1	COVID_G2G3 vs Healthy	0.601251	8.46684	23.8802	9.48357e-06	0.000151507
RAB3D	COVID_G2G3 vs Healthy	-0.562849	6.37107	23.8798	9.48648e-06	0.000151507
DYNLRB1	COVID_G2G3 vs Healthy	0.415233	6.46345	23.8422	9.6158e-06	0.000153199
HNRNPA3	COVID_G2G3 vs Healthy	-0.347673	8.33965	23.7963	9.77492e-06	0.000155357
NEDD9	COVID_G2G3 vs Healthy	-0.749142	5.62149	23.7816	9.83114e-06	0.000155873
HSPD1	COVID_G2G3 vs Healthy	-0.652313	6.46375	23.7154	1.00656e-05	0.000159207
SDHB	COVID_G2G3 vs Healthy	0.467776	6.50994	23.6367	1.03558e-05	0.000163403
IGFBP7	COVID_G2G3 vs Healthy	0.656839	5.41725	23.6038	1.04854e-05	0.000164809
LINC-PINT	COVID_G2G3 vs Healthy	-0.60528	5.69494	23.6004	1.04951e-05	0.000164809
NDUFAF8	COVID_G2G3 vs Healthy	-0.688104	5.16515	23.5857	1.05539e-05	0.000165336
VENTX	COVID_G2G3 vs Healthy	-1.2088	4.09115	23.5806	1.06156e-05	0.000165907
IVNS1ABP	COVID_G2G3 vs Healthy	-0.738842	6.86803	23.5405	1.07221e-05	0.000167173
AIF1	COVID_G2G3 vs Healthy	0.383714	10.7566	23.5111	1.08359e-05	0.000168547
HNRNPR	COVID_G2G3 vs Healthy	-0.355177	7.01151	23.4535	1.10653e-05	0.000171573
CANX	COVID_G2G3 vs Healthy	-0.437797	7.81811	23.4491	1.10827e-05	0.000171573
CARD6	COVID_G2G3 vs Healthy	0.668112	4.91626	23.4424	1.11437e-05	0.000172111
NAT9	COVID_G2G3 vs Healthy	-0.873554	4.23102	23.4292	1.11861e-05	0.00017236
SWAP70	COVID_G2G3 vs Healthy	0.713548	5.32576	23.4177	1.12209e-05	0.000172492
LMO2	COVID_G2G3 vs Healthy	0.569669	7.61703	23.2118	1.20801e-05	0.000185266
LARP7	COVID_G2G3 vs Healthy	0.465438	6.59292	23.2011	1.21284e-05	0.000185573
TSPAN3	COVID_G2G3 vs Healthy	-0.510638	4.51632	23.1702	1.22934e-05	0.000187661
LRRC25	COVID_G2G3 vs Healthy	0.42245	7.45529	23.151	1.23503e-05	0.000188092
NDUFV2	COVID_G2G3 vs Healthy	0.413455	6.78814	23.1267	1.24604e-05	0.000188522
IFI27L2	COVID_G2G3 vs Healthy	0.633688	6.73028	23.1239	1.24737e-05	0.000188522
UBA52	COVID_G2G3 vs Healthy	-0.347943	10.8559	23.1193	1.2493e-05	0.000188522
PSENEN	COVID_G2G3 vs Healthy	0.43391	5.75578	23.12	1.24935e-05	0.000188522
SMDT1	COVID_G2G3 vs Healthy	-0.677087	7.043	23.035	1.28837e-05	0.000193702
C4orf33	COVID_G2G3 vs Healthy	0.66547	5.12489	23.0351	1.28958e-05	0.000193702
DHX9	COVID_G2G3 vs Healthy	-0.396748	6.33229	23.017	1.29697e-05	0.000194368
MAF1	COVID_G2G3 vs Healthy	-0.443921	6.14356	22.9509	1.32865e-05	0.000198662
FBXO6	COVID_G2G3 vs Healthy	1.14429	5.04088	22.9146	1.34766e-05	0.000201047
SLC25A3	COVID_G2G3 vs Healthy	-0.452696	8.33561	22.8965	1.35511e-05	0.000201679
SAMD4A	COVID_G2G3 vs Healthy	1.81705	5.13592	22.8937	1.35804e-05	0.000201679
SNRPG	COVID_G2G3 vs Healthy	0.374873	6.98045	22.8728	1.36698e-05	0.000202548
SNCA	COVID_G2G3 vs Healthy	-1.00581	3.63971	22.8644	1.37878e-05	0.000203835
TNFSF10	COVID_G2G3 vs Healthy	1.48092	8.91803	22.8387	1.38403e-05	0.000204153
PARP14	COVID_G2G3 vs Healthy	1.48713	8.42973	22.8142	1.39656e-05	0.000205137
CLU	COVID_G2G3 vs Healthy	4.95192	6.00073	22.454	1.39696e-05	0.000205137
NME2	COVID_G2G3 vs Healthy	-0.519841	8.52719	22.7906	1.40864e-05	0.000205676
DDB1	COVID_G2G3 vs Healthy	-0.535315	5.40502	22.7895	1.40993e-05	0.000205676
SUN1	COVID_G2G3 vs Healthy	-0.56202	4.65387	22.7927	1.41002e-05	0.000205676
FKBP15	COVID_G2G3 vs Healthy	0.306522	6.82811	22.769	1.41994e-05	0.000206663
CBLL1	COVID_G2G3 vs Healthy	0.486714	4.50787	22.767	1.42489e-05	0.000206925
PSMD7	COVID_G2G3 vs Healthy	0.341661	6.78648	22.7085	1.45174e-05	0.000210358
HIST1H1C	COVID_G2G3 vs Healthy	1.69619	5.53147	22.6985	1.46006e-05	0.000211097
EVI5	COVID_G2G3 vs Healthy	-0.396883	6.23852	22.6769	1.4688e-05	0.000211895
RTCB	COVID_G2G3 vs Healthy	0.856911	5.98049	22.6443	1.48664e-05	0.000213998
MITD1	COVID_G2G3 vs Healthy	0.510229	5.40287	22.63	1.49481e-05	0.000214704
MIB1	COVID_G2G3 vs Healthy	-0.478361	5.17271	22.6035	1.51043e-05	0.000216473
MLEC	COVID_G2G3 vs Healthy	-0.716369	5.64912	22.5899	1.51669e-05	0.000216897
INSR	COVID_G2G3 vs Healthy	-0.598769	5.17917	22.4741	1.58353e-05	0.000225936
RPS28	COVID_G2G3 vs Healthy	-0.40716	11.2969	22.4636	1.58811e-05	0.000225936
DYNC1H1	COVID_G2G3 vs Healthy	-0.372353	7.09694	22.4602	1.59023e-05	0.000225936
PCNT	COVID_G2G3 vs Healthy	-0.635775	4.26054	22.3994	1.63085e-05	0.000231208
CINP	COVID_G2G3 vs Healthy	0.49371	4.94574	22.3669	1.64736e-05	0.000233044
TYMP	COVID_G2G3 vs Healthy	0.966122	10.5959	22.3038	1.68439e-05	0.00023777
MED8	COVID_G2G3 vs Healthy	0.474551	5.06905	22.2986	1.68947e-05	0.000237976
RAB4A	COVID_G2G3 vs Healthy	-0.656626	5.37096	22.2898	1.6939e-05	0.000238089
CD2AP	COVID_G2G3 vs Healthy	1.13494	5.11369	22.2728	1.70629e-05	0.000239318
CHP1	COVID_G2G3 vs Healthy	-0.542629	6.65812	22.2217	1.7363e-05	0.000243008
SYNGR2	COVID_G2G3 vs Healthy	0.390912	6.87461	22.1922	1.75529e-05	0.000245069
AMFR	COVID_G2G3 vs Healthy	-0.637364	5.05176	22.1898	1.75849e-05	0.000245069
FLVCR2	COVID_G2G3 vs Healthy	0.898616	4.43854	22.1867	1.76542e-05	0.000245513
S100A6	COVID_G2G3 vs Healthy	0.432667	12.1156	22.1242	1.79981e-05	0.000249331
VPS13C	COVID_G2G3 vs Healthy	-0.359988	7.84968	22.1233	1.80047e-05	0.000249331
FPR2	COVID_G2G3 vs Healthy	1.42839	5.81774	22.1093	1.81084e-05	0.000249513
FXR1	COVID_G2G3 vs Healthy	-0.404858	6.47044	22.108	1.81084e-05	0.000249513
EIF4EBP1	COVID_G2G3 vs Healthy	-0.447487	6.32951	22.1045	1.81319e-05	0.000249513
CYSTM1	COVID_G2G3 vs Healthy	0.948778	5.40591	21.9899	1.89259e-05	0.00025966
ERGIC3	COVID_G2G3 vs Healthy	-0.362807	6.10728	21.9856	1.89484e-05	0.00025966
CLN5	COVID_G2G3 vs Healthy	0.436586	4.53188	21.9672	1.911e-05	0.000261329
SLC9A3R1	COVID_G2G3 vs Healthy	-0.685649	5.78744	21.9519	1.91889e-05	0.000261862
TXNDC17	COVID_G2G3 vs Healthy	0.391556	6.76785	21.9144	1.94526e-05	0.000264745
SRA1	COVID_G2G3 vs Healthy	0.515251	6.37692	21.9107	1.94808e-05	0.000264745
RPLP2	COVID_G2G3 vs Healthy	-0.496794	10.8775	21.884	1.96716e-05	0.000266786
APEX1	COVID_G2G3 vs Healthy	-0.920813	6.02051	21.8389	2.00073e-05	0.000270779
ATP6AP2	COVID_G2G3 vs Healthy	-0.356089	7.78624	21.7976	2.03133e-05	0.000274355
MARCH1	COVID_G2G3 vs Healthy	0.45649	8.24281	21.7516	2.06632e-05	0.00027795
PSMD11	COVID_G2G3 vs Healthy	0.322057	5.81732	21.7522	2.06641e-05	0.00027795
CTSD	COVID_G2G3 vs Healthy	0.790795	9.25541	21.7234	2.08808e-05	0.00028029
TOR1A	COVID_G2G3 vs Healthy	0.503889	5.21711	21.7151	2.09588e-05	0.000280763
RNASEL	COVID_G2G3 vs Healthy	0.774982	4.04992	21.7102	2.10572e-05	0.000281507
CD82	COVID_G2G3 vs Healthy	1.24537	4.53461	21.6662	2.13968e-05	0.000285465
NORAD	COVID_G2G3 vs Healthy	-0.388151	7.13264	21.6274	2.1641e-05	0.000288137
ATP6V0E1	COVID_G2G3 vs Healthy	0.440771	8.62545	21.6082	2.17948e-05	0.000289598
UFC1	COVID_G2G3 vs Healthy	-0.379221	6.79881	21.5711	2.21e-05	0.00029306
RELL1	COVID_G2G3 vs Healthy	-0.866282	5.49197	21.5633	2.21716e-05	0.000293279
RPL39	COVID_G2G3 vs Healthy	-0.451093	11.5828	21.5581	2.22059e-05	0.000293279
HSPA6	COVID_G2G3 vs Healthy	1.21431	5.31135	21.5286	2.24844e-05	0.000295467
NAPA	COVID_G2G3 vs Healthy	0.830668	6.56564	21.5231	2.25001e-05	0.000295467
DST	COVID_G2G3 vs Healthy	-1.35223	4.6269	21.5262	2.25066e-05	0.000295467
AHCY	COVID_G2G3 vs Healthy	-0.730595	4.02388	21.4962	2.27843e-05	0.000298515
AC010642.2	COVID_G2G3 vs Healthy	-1.07665	4.06011	21.4825	2.29124e-05	0.000299596
RPL37A	COVID_G2G3 vs Healthy	-0.479049	10.9093	21.4311	2.32829e-05	0.000303835
PNN	COVID_G2G3 vs Healthy	-0.510435	6.95494	21.3925	2.36227e-05	0.000307658
EXOC6	COVID_G2G3 vs Healthy	0.671986	5.43524	21.3528	2.39959e-05	0.000311096
MTHFD2	COVID_G2G3 vs Healthy	0.793433	6.1679	21.3485	2.40184e-05	0.000311096
LILRB1	COVID_G2G3 vs Healthy	1.11481	7.37681	21.3447	2.40485e-05	0.000311096
TIMP2	COVID_G2G3 vs Healthy	0.321283	7.87624	21.3415	2.40763e-05	0.000311096
PSMB6	COVID_G2G3 vs Healthy	0.373356	6.89675	21.2622	2.48018e-05	0.000318853
RPL37	COVID_G2G3 vs Healthy	-0.43673	11.3681	21.2611	2.48103e-05	0.000318853
JOSD2	COVID_G2G3 vs Healthy	0.456427	5.90467	21.2605	2.48223e-05	0.000318853
SMIM30	COVID_G2G3 vs Healthy	0.689499	5.19269	21.2035	2.53762e-05	0.00032533
RPS27L	COVID_G2G3 vs Healthy	0.736972	7.07544	21.1861	2.5519e-05	0.000326524
SFPQ	COVID_G2G3 vs Healthy	-0.436498	8.30854	21.1404	2.59587e-05	0.000330546
MT-ND4	COVID_G2G3 vs Healthy	-0.700554	12.3471	21.1353	2.60083e-05	0.000330546
KRTCAP2	COVID_G2G3 vs Healthy	0.300497	7.16323	21.1331	2.60312e-05	0.000330546
AKR1B1	COVID_G2G3 vs Healthy	-1.20486	4.15053	21.1401	2.60348e-05	0.000330546
MAP4K5	COVID_G2G3 vs Healthy	-0.587721	4.21676	21.1328	2.61165e-05	0.000330943
HDLBP	COVID_G2G3 vs Healthy	-0.291359	6.3842	21.0319	2.70407e-05	0.000341994
CCDC28A	COVID_G2G3 vs Healthy	0.454357	4.97099	21.0142	2.72498e-05	0.000343677
SNX2	COVID_G2G3 vs Healthy	0.338867	7.90469	21.0083	2.72785e-05	0.000343677
NCL	COVID_G2G3 vs Healthy	-0.467846	7.90828	20.9556	2.7824e-05	0.000349879
EFHD2	COVID_G2G3 vs Healthy	0.416798	8.98988	20.9311	2.80819e-05	0.000352447
MILR1	COVID_G2G3 vs Healthy	0.759172	4.68872	20.9244	2.81948e-05	0.000353188
STXBP2	COVID_G2G3 vs Healthy	0.767547	8.93199	20.8927	2.84899e-05	0.000356205
PHB2	COVID_G2G3 vs Healthy	-0.480473	6.51396	20.8843	2.85826e-05	0.000356684
STAT2	COVID_G2G3 vs Healthy	1.04097	7.32921	20.8779	2.86514e-05	0.000356865
STX17	COVID_G2G3 vs Healthy	0.651466	4.93132	20.8189	2.93385e-05	0.000364071
SASH3	COVID_G2G3 vs Healthy	0.50361	6.30039	20.8151	2.93409e-05	0.000364071
BRWD3	COVID_G2G3 vs Healthy	-0.405032	5.57561	20.8059	2.94515e-05	0.000364753
SERPINA1	COVID_G2G3 vs Healthy	0.758872	9.47207	20.7648	2.98973e-05	0.000369493
MT-ND1	COVID_G2G3 vs Healthy	-0.609352	12.3851	20.7604	2.99467e-05	0.000369493
PNPT1	COVID_G2G3 vs Healthy	1.21458	5.37225	20.7299	3.03269e-05	0.000373482
ISCA2	COVID_G2G3 vs Healthy	0.458126	4.80724	20.7256	3.03839e-05	0.000373483
GNG2	COVID_G2G3 vs Healthy	-0.972115	5.52594	20.7072	3.05644e-05	0.000374999
PEBP1	COVID_G2G3 vs Healthy	-0.883973	5.21078	20.6892	3.07775e-05	0.00037691
B2M	COVID_G2G3 vs Healthy	0.617754	13.3102	20.6531	3.11843e-05	0.00038118
CYSLTR1	COVID_G2G3 vs Healthy	0.796332	5.82651	20.6023	3.1801e-05	0.000387996
MCRIP2	COVID_G2G3 vs Healthy	-0.764651	4.94257	20.5912	3.19418e-05	0.00038899
RPL12	COVID_G2G3 vs Healthy	-0.43935	10.7833	20.5287	3.26859e-05	0.000397315
IL15RA	COVID_G2G3 vs Healthy	1.00671	3.76726	20.519	3.29542e-05	0.000399836
EPB41	COVID_G2G3 vs Healthy	-0.450713	6.05433	20.4463	3.37299e-05	0.000408493
ARHGAP27	COVID_G2G3 vs Healthy	0.448911	6.13958	20.4382	3.38334e-05	0.000408525
COX8A	COVID_G2G3 vs Healthy	0.372828	8.25698	20.4358	3.3857e-05	0.000408525
MSRB1	COVID_G2G3 vs Healthy	0.65351	7.25386	20.4256	3.39904e-05	0.000409381
TBC1D9	COVID_G2G3 vs Healthy	-0.976135	5.74104	20.3684	3.47441e-05	0.000416889
SELL	COVID_G2G3 vs Healthy	0.92265	8.82976	20.3642	3.47896e-05	0.000416889
S100A11	COVID_G2G3 vs Healthy	0.42584	11.1308	20.363	3.48043e-05	0.000416889
YME1L1	COVID_G2G3 vs Healthy	0.39988	7.53855	20.3529	3.49393e-05	0.000417744
MRPL44	COVID_G2G3 vs Healthy	0.689051	4.9076	20.3199	3.54313e-05	0.000422857
TOB2	COVID_G2G3 vs Healthy	-0.554153	5.04409	20.2955	3.57347e-05	0.000425703
RPS12	COVID_G2G3 vs Healthy	-0.502345	11.5766	20.2729	3.60168e-05	0.000427641
ZNF487	COVID_G2G3 vs Healthy	-0.618531	4.21934	20.277	3.60277e-05	0.000427641
PLEK	COVID_G2G3 vs Healthy	0.672035	8.68913	20.251	3.63177e-05	0.000430306
AHR	COVID_G2G3 vs Healthy	-0.598323	7.9323	20.2021	3.70003e-05	0.000437603
CDV3	COVID_G2G3 vs Healthy	-0.301722	7.94046	20.1857	3.72317e-05	0.000439549
BST2	COVID_G2G3 vs Healthy	0.891894	8.3719	20.1685	3.74748e-05	0.000441614
CARS	COVID_G2G3 vs Healthy	0.451904	4.95697	20.1636	3.7589e-05	0.000441614
SAT2	COVID_G2G3 vs Healthy	0.43655	7.31013	20.1592	3.76085e-05	0.000441614
BUD31	COVID_G2G3 vs Healthy	0.384029	6.64116	20.1188	3.81942e-05	0.00044769
AC100810.1	COVID_G2G3 vs Healthy	-0.788975	4.40771	20.0893	3.86855e-05	0.000452641
ADPRH	COVID_G2G3 vs Healthy	0.702853	4.03395	20.0825	3.88717e-05	0.000454011
FCGR1B	COVID_G2G3 vs Healthy	1.505	5.66212	20.0453	3.9294e-05	0.000458128
TCF7L2	COVID_G2G3 vs Healthy	0.983672	6.29934	20.0279	3.95445e-05	0.000459801
ISCA1	COVID_G2G3 vs Healthy	-0.51238	4.76133	20.0277	3.95777e-05	0.000459801
UBA2	COVID_G2G3 vs Healthy	-0.371149	5.61673	20.0124	3.97845e-05	0.000461388
AGO1	COVID_G2G3 vs Healthy	-0.584769	5.66388	20.0034	3.99229e-05	0.000462177
GPR155	COVID_G2G3 vs Healthy	-0.88489	4.97381	19.9975	4.00375e-05	0.000462687
IRS2	COVID_G2G3 vs Healthy	-1.23603	7.42481	19.9864	4.01705e-05	0.000463408
GLUD1	COVID_G2G3 vs Healthy	-0.29039	6.47963	19.9597	4.0585e-05	0.000467369
C3AR1	COVID_G2G3 vs Healthy	1.34042	6.7662	19.948	4.07668e-05	0.00046864
SERBP1	COVID_G2G3 vs Healthy	-0.330134	7.92381	19.9235	4.11456e-05	0.000472167
FOXP1	COVID_G2G3 vs Healthy	-0.459484	7.35121	19.8688	4.2015e-05	0.000481302
ZNF106	COVID_G2G3 vs Healthy	-0.322962	7.86067	19.8447	4.24042e-05	0.000484236
B3GALT4	COVID_G2G3 vs Healthy	0.676567	4.25363	19.8504	4.24285e-05	0.000484236
GBP1	COVID_G2G3 vs Healthy	2.81411	7.01677	19.8395	4.24923e-05	0.000484236
KMT2A	COVID_G2G3 vs Healthy	-0.354963	6.20874	19.8258	4.27203e-05	0.00048599
MCTS1	COVID_G2G3 vs Healthy	0.34615	5.84261	19.8124	4.29414e-05	0.00048766
CERS2	COVID_G2G3 vs Healthy	-0.29591	5.80831	19.7871	4.33576e-05	0.000491536
CDC42EP2	COVID_G2G3 vs Healthy	1.01	4.3033	19.7679	4.37721e-05	0.00049538
POLR2K	COVID_G2G3 vs Healthy	0.39596	5.64393	19.7466	4.40401e-05	0.000497554
RRBP1	COVID_G2G3 vs Healthy	0.526081	6.64368	19.7317	4.4283e-05	0.000499439
MRE11	COVID_G2G3 vs Healthy	-0.515559	4.80238	19.7081	4.47446e-05	0.00050378
TRAPPC6A	COVID_G2G3 vs Healthy	-0.843346	4.77099	19.6983	4.48814e-05	0.000504454
PSMC6	COVID_G2G3 vs Healthy	0.333377	6.40294	19.6823	4.51313e-05	0.000506396
RPL36A	COVID_G2G3 vs Healthy	-0.550538	10.1805	19.6465	4.57485e-05	0.000512446
FERMT3	COVID_G2G3 vs Healthy	0.296848	7.68705	19.6405	4.5854e-05	0.000512753
MOV10	COVID_G2G3 vs Healthy	1.25025	4.00385	19.6167	4.64648e-05	0.000518698
CPNE2	COVID_G2G3 vs Healthy	-0.614413	4.13304	19.5774	4.7092e-05	0.000524808
HLA-B	COVID_G2G3 vs Healthy	0.529973	11.6859	19.5484	4.7504e-05	0.000528502
HSP90AB1	COVID_G2G3 vs Healthy	-0.653635	8.28529	19.5199	4.80281e-05	0.000533175
SMCR8	COVID_G2G3 vs Healthy	0.488864	5.27026	19.5191	4.80865e-05	0.000533175
PIM3	COVID_G2G3 vs Healthy	0.863321	6.99418	19.5095	4.82237e-05	0.000533795
COA6	COVID_G2G3 vs Healthy	0.65496	5.75613	19.5043	4.83322e-05	0.000534095
RPS20	COVID_G2G3 vs Healthy	-0.492642	9.75066	19.4963	4.8466e-05	0.000534218
RFXANK	COVID_G2G3 vs Healthy	0.477469	5.33266	19.4913	4.85821e-05	0.000534218
NCSTN	COVID_G2G3 vs Healthy	0.418297	5.93048	19.4904	4.85875e-05	0.000534218
WDR46	COVID_G2G3 vs Healthy	-0.459074	4.68067	19.4738	4.89336e-05	0.000536866
CALM1	COVID_G2G3 vs Healthy	0.400526	9.20509	19.4682	4.89919e-05	0.000536866
LEPROTL1	COVID_G2G3 vs Healthy	0.598263	6.78781	19.4003	5.02932e-05	0.000550208
PPP4C	COVID_G2G3 vs Healthy	0.284	6.93196	19.3942	5.04108e-05	0.000550577
SLC9A1	COVID_G2G3 vs Healthy	0.50435	4.09941	19.3875	5.07066e-05	0.000552887
CEP85L	COVID_G2G3 vs Healthy	-0.77322	5.78943	19.3591	5.11094e-05	0.000556355
JAK3	COVID_G2G3 vs Healthy	1.0301	5.78159	19.3096	5.21118e-05	0.000566327
ABCE1	COVID_G2G3 vs Healthy	-0.872882	5.01689	19.3012	5.22869e-05	0.000567012
MRPL17	COVID_G2G3 vs Healthy	0.676647	4.20436	19.3028	5.23781e-05	0.000567012
ITPRIPL2	COVID_G2G3 vs Healthy	-0.506521	5.52336	19.2933	5.24339e-05	0.000567012
IL10RB	COVID_G2G3 vs Healthy	0.42188	6.68699	19.2746	5.27918e-05	0.000569943
SELENOW	COVID_G2G3 vs Healthy	0.439278	6.37957	19.2337	5.36325e-05	0.00057744
GTF3C6	COVID_G2G3 vs Healthy	0.354222	6.27325	19.2323	5.36621e-05	0.00057744
TOB1	COVID_G2G3 vs Healthy	-0.695361	6.3052	19.2135	5.40535e-05	0.000580651
CELF1	COVID_G2G3 vs Healthy	-0.43277	7.17645	19.2093	5.41375e-05	0.000580651
HK3	COVID_G2G3 vs Healthy	0.580245	6.06928	19.1943	5.446e-05	0.000583157
TMEM65	COVID_G2G3 vs Healthy	-0.460323	4.82838	19.1834	5.47545e-05	0.000585064
EIF4H	COVID_G2G3 vs Healthy	-0.330922	6.71462	19.1771	5.48163e-05	0.000585064
SND1	COVID_G2G3 vs Healthy	-0.571041	5.80903	19.1706	5.4962e-05	0.000585666
PARP11	COVID_G2G3 vs Healthy	0.823742	4.2875	19.1378	5.58158e-05	0.000593801
EIF2A	COVID_G2G3 vs Healthy	-0.388017	6.48693	19.076	5.70036e-05	0.000605455
ITGB7	COVID_G2G3 vs Healthy	1.25645	4.22971	19.0667	5.73613e-05	0.000608204
PLXDC2	COVID_G2G3 vs Healthy	-0.343137	7.72744	19.0558	5.74476e-05	0.000608204
AAGAB	COVID_G2G3 vs Healthy	0.520459	4.26513	19.0036	5.87953e-05	0.000621469
LIMS1	COVID_G2G3 vs Healthy	0.383509	7.22853	18.9912	5.8904e-05	0.000621617
ECH1	COVID_G2G3 vs Healthy	0.411294	6.39792	18.9379	6.01386e-05	0.00063297
TRAFD1	COVID_G2G3 vs Healthy	0.71172	5.1345	18.9389	6.01726e-05	0.00063297
PDCD4	COVID_G2G3 vs Healthy	-0.482278	6.44187	18.9171	6.0625e-05	0.000636708
SULF2	COVID_G2G3 vs Healthy	-0.802992	6.95541	18.9104	6.07814e-05	0.000637055
SMCHD1	COVID_G2G3 vs Healthy	0.678148	8.53453	18.9073	6.08521e-05	0.000637055
IL1RN	COVID_G2G3 vs Healthy	1.2973	6.45491	18.8866	6.13498e-05	0.000641242
ATP2B1	COVID_G2G3 vs Healthy	-0.943387	8.16177	18.8711	6.1714e-05	0.000644024
S100A8	COVID_G2G3 vs Healthy	1.15016	13.7227	18.8042	6.33367e-05	0.000659908
SRSF8	COVID_G2G3 vs Healthy	-0.96047	3.9974	18.8013	6.35996e-05	0.000661597
ST3GAL5	COVID_G2G3 vs Healthy	0.837948	6.03851	18.7864	6.37934e-05	0.000662563
HCFC1R1	COVID_G2G3 vs Healthy	0.593554	4.82423	18.7806	6.39963e-05	0.00066362
UBA7	COVID_G2G3 vs Healthy	0.68481	4.9574	18.7749	6.41218e-05	0.000663873
TTC19	COVID_G2G3 vs Healthy	-0.545638	5.05925	18.747	6.47973e-05	0.00066981
TMEM245	COVID_G2G3 vs Healthy	-0.420205	4.66252	18.7145	6.56887e-05	0.000677957
CHCHD1	COVID_G2G3 vs Healthy	0.352282	5.9859	18.6984	6.60127e-05	0.000680231
NADK	COVID_G2G3 vs Healthy	0.470682	6.85298	18.687	6.6297e-05	0.00068209
ERLIN2	COVID_G2G3 vs Healthy	0.5186	4.74043	18.6561	6.72131e-05	0.000690433
RIN2	COVID_G2G3 vs Healthy	0.581697	5.76684	18.6405	6.75388e-05	0.000692694
UBXN7	COVID_G2G3 vs Healthy	-0.420528	5.71932	18.6337	6.77066e-05	0.000693332
RPS27	COVID_G2G3 vs Healthy	-0.434502	11.486	18.623	6.79667e-05	0.000694911
ZNF609	COVID_G2G3 vs Healthy	-0.527869	4.93745	18.6204	6.81003e-05	0.000695195
SYNCRIP	COVID_G2G3 vs Healthy	-0.321548	7.12193	18.5971	6.86616e-05	0.000699836
IL2RG	COVID_G2G3 vs Healthy	1.22727	5.77235	18.5681	6.94624e-05	0.000706901
BLZF1	COVID_G2G3 vs Healthy	0.69033	4.41065	18.5616	6.97989e-05	0.000709226
HOOK3	COVID_G2G3 vs Healthy	-0.375927	7.0641	18.5159	7.08742e-05	0.000719039
RBMX	COVID_G2G3 vs Healthy	-0.410191	6.77382	18.4895	7.16077e-05	0.00072536
REPIN1	COVID_G2G3 vs Healthy	-0.678974	4.82622	18.4477	7.28405e-05	0.00073671
DDB2	COVID_G2G3 vs Healthy	1.2173	3.83943	18.4475	7.30829e-05	0.000738025
TSPYL1	COVID_G2G3 vs Healthy	-0.413184	5.2681	18.4308	7.32968e-05	0.000739048
FAM32A	COVID_G2G3 vs Healthy	0.262031	6.17808	18.412	7.38169e-05	0.00074315
SRSF5	COVID_G2G3 vs Healthy	-0.379741	9.1226	18.407	7.39502e-05	0.000743353
NLN	COVID_G2G3 vs Healthy	-0.646831	4.77778	18.4034	7.4178e-05	0.000744502
CNIH4	COVID_G2G3 vs Healthy	0.922068	6.30516	18.3823	7.46801e-05	0.000748397
SNHG16	COVID_G2G3 vs Healthy	-0.601606	5.6535	18.3525	7.55636e-05	0.000756097
MPDU1	COVID_G2G3 vs Healthy	0.427827	5.30198	18.3463	7.57617e-05	0.000756925
DOK1	COVID_G2G3 vs Healthy	0.5091	4.96264	18.3375	7.60541e-05	0.000758691
EIF4G2	COVID_G2G3 vs Healthy	-0.298703	8.50978	18.3147	7.66742e-05	0.000763717
NLRC4	COVID_G2G3 vs Healthy	0.631849	5.14156	18.3063	7.70183e-05	0.000765982
C1GALT1C1	COVID_G2G3 vs Healthy	0.598647	4.36808	18.2955	7.7403e-05	0.000768644
RBM15B	COVID_G2G3 vs Healthy	-0.434418	4.57008	18.2684	7.81589e-05	0.000774977
CD300A	COVID_G2G3 vs Healthy	0.618448	6.62875	18.2427	7.88743e-05	0.000780891
YBX1	COVID_G2G3 vs Healthy	-0.382707	9.4433	18.206	8.00116e-05	0.000790958
NDUFA10	COVID_G2G3 vs Healthy	-0.385412	6.24425	18.2021	8.01441e-05	0.000791077
PAFAH1B3	COVID_G2G3 vs Healthy	0.562094	3.9698	18.2031	8.03447e-05	0.000791866
IDS	COVID_G2G3 vs Healthy	-0.558476	7.4998	18.155	8.16337e-05	0.000803364
BNIP3L	COVID_G2G3 vs Healthy	-0.371919	7.60854	18.1249	8.26055e-05	0.000810689
MRPS6	COVID_G2G3 vs Healthy	-0.68422	5.26945	18.1251	8.2625e-05	0.000810689
EIF3I	COVID_G2G3 vs Healthy	-0.361436	6.53742	18.0895	8.37648e-05	0.000819705
UNC93B1	COVID_G2G3 vs Healthy	0.48435	7.15425	18.0886	8.37937e-05	0.000819705
PLCB1	COVID_G2G3 vs Healthy	-1.05096	5.12034	18.063	8.4682e-05	0.000827161
GTF2I	COVID_G2G3 vs Healthy	-0.373381	7.48567	18.0454	8.52274e-05	0.000831252
PTPN6	COVID_G2G3 vs Healthy	0.37816	7.9419	18.0398	8.54155e-05	0.000831851
HNRNPK	COVID_G2G3 vs Healthy	-0.190717	8.77354	18.024	8.59477e-05	0.000835794
CAPZA1	COVID_G2G3 vs Healthy	0.27375	8.02486	18.0167	8.61978e-05	0.000836986
CPVL	COVID_G2G3 vs Healthy	-0.629669	8.64233	18.0096	8.64368e-05	0.000838067
OGFR	COVID_G2G3 vs Healthy	0.434528	6.5278	18.0008	8.67435e-05	0.0008398
LRPAP1	COVID_G2G3 vs Healthy	0.477969	7.14316	17.9761	8.75888e-05	0.000846735
TGOLN2	COVID_G2G3 vs Healthy	-0.353384	7.64931	17.9624	8.80619e-05	0.000850057
CD53	COVID_G2G3 vs Healthy	0.421432	8.38672	17.9248	8.9374e-05	0.000861455
HLA-A	COVID_G2G3 vs Healthy	0.760866	11.1506	17.8988	9.02957e-05	0.000869063
IPO7	COVID_G2G3 vs Healthy	-0.480581	5.66474	17.8868	9.0751e-05	0.000872167
EIF4EBP2	COVID_G2G3 vs Healthy	-0.338711	6.43908	17.8543	9.19062e-05	0.000881977
NAGK	COVID_G2G3 vs Healthy	0.631613	7.83148	17.8432	9.2301e-05	0.000883135
GIMAP5	COVID_G2G3 vs Healthy	1.34264	4.6727	17.8465	9.2404e-05	0.000883135
HERC1	COVID_G2G3 vs Healthy	-0.446108	5.86258	17.8401	9.24305e-05	0.000883135
RCSD1	COVID_G2G3 vs Healthy	-0.305116	7.57137	17.8217	9.30884e-05	0.000888128
GTPBP2	COVID_G2G3 vs Healthy	0.696715	4.48245	17.8161	9.35246e-05	0.000890995
CEBPG	COVID_G2G3 vs Healthy	0.323345	5.7492	17.7945	9.4118e-05	0.000895349
TNRC6B	COVID_G2G3 vs Healthy	-0.344349	7.18024	17.7685	9.50686e-05	0.000903083
SFT2D1	COVID_G2G3 vs Healthy	0.345466	6.47125	17.72	9.69127e-05	0.000919116
PHF23	COVID_G2G3 vs Healthy	0.535483	4.50644	17.7225	9.70365e-05	0.000919116
APOBEC3C	COVID_G2G3 vs Healthy	0.579173	5.6391	17.7039	9.75538e-05	0.000922685
EDEM2	COVID_G2G3 vs Healthy	0.406916	5.23168	17.6664	9.9031e-05	0.000935309
UTRN	COVID_G2G3 vs Healthy	0.44717	7.76456	17.6529	9.95166e-05	0.000938544
SIGLEC10	COVID_G2G3 vs Healthy	0.803362	5.57071	17.579	0.00010252	0.000965485
TNFRSF10A	COVID_G2G3 vs Healthy	0.69317	3.82551	17.5786	0.000102808	0.000966811
FFAR2	COVID_G2G3 vs Healthy	1.7206	5.82316	17.5669	0.000103004	0.000967269
TTC9C	COVID_G2G3 vs Healthy	0.688317	4.278	17.5582	0.000103579	0.000971278
HNRNPH1	COVID_G2G3 vs Healthy	-0.400189	7.94306	17.5436	0.000103922	0.000973102
OPTN	COVID_G2G3 vs Healthy	1.87502	3.48848	17.5299	0.000104986	0.000981063
SNX29	COVID_G2G3 vs Healthy	-0.457143	5.37086	17.5168	0.000105071	0.000981063
TENT2	COVID_G2G3 vs Healthy	0.337664	5.81459	17.5008	0.000105738	0.000985888
APRT	COVID_G2G3 vs Healthy	-0.519131	7.63374	17.4596	0.000107446	0.00100039
ACOT13	COVID_G2G3 vs Healthy	0.650272	3.98326	17.4601	0.00010773	0.00100161
MT-CO2	COVID_G2G3 vs Healthy	-0.539434	13.0394	17.3841	0.000110722	0.00102797
PRR13	COVID_G2G3 vs Healthy	0.279355	8.05627	17.3805	0.00011088	0.00102799
PTGER4	COVID_G2G3 vs Healthy	-0.671014	6.38685	17.3604	0.000111783	0.0010349
CCL2	COVID_G2G3 vs Healthy	4.16343	4.61651	17.3528	0.00011231	0.00103831
BRI3BP	COVID_G2G3 vs Healthy	-0.668831	5.07545	17.3326	0.000113089	0.00104404
MYADM	COVID_G2G3 vs Healthy	-0.535833	9.06274	17.3269	0.000113271	0.00104426
PUM2	COVID_G2G3 vs Healthy	-0.354281	6.07562	17.3157	0.000113796	0.00104763
CD44	COVID_G2G3 vs Healthy	-0.584074	9.76877	17.3105	0.00011401	0.00104813
RPGR	COVID_G2G3 vs Healthy	-0.486735	5.46713	17.3068	0.000114218	0.00104857
TCP1	COVID_G2G3 vs Healthy	-0.285069	5.9246	17.3005	0.000114485	0.00104955
HMGN3	COVID_G2G3 vs Healthy	-0.444275	6.87492	17.25	0.000116799	0.00106928
NUCB1	COVID_G2G3 vs Healthy	0.542392	6.63287	17.2438	0.00011709	0.00106939
H1FX	COVID_G2G3 vs Healthy	0.618349	7.97881	17.2427	0.000117138	0.00106939
BATF	COVID_G2G3 vs Healthy	0.863002	4.13655	17.2207	0.000118481	0.00108015
NDUFB9	COVID_G2G3 vs Healthy	0.472018	6.91614	17.203	0.00011901	0.00108347
PCMT1	COVID_G2G3 vs Healthy	0.440298	6.92432	17.1384	0.000122121	0.00111025
TTC1	COVID_G2G3 vs Healthy	0.342535	5.81304	17.1146	0.000123311	0.00111952
PDCD10	COVID_G2G3 vs Healthy	0.377261	6.3552	17.1014	0.000123951	0.00112378
AC015871.7	COVID_G2G3 vs Healthy	-0.811168	4.24565	17.082	0.000125141	0.001133
MAP3K3	COVID_G2G3 vs Healthy	-0.289573	6.62842	17.0607	0.000125974	0.00113897
IGSF6	COVID_G2G3 vs Healthy	0.410166	8.75723	17.0526	0.000126375	0.00114034
EEF1D	COVID_G2G3 vs Healthy	-0.31583	9.1078	17.0507	0.000126472	0.00114034
RAB5IF	COVID_G2G3 vs Healthy	0.365987	8.13198	17.0143	0.000128329	0.0011535
CAMLG	COVID_G2G3 vs Healthy	-0.41737	5.8853	17.0139	0.000128372	0.0011535
ALDH1A1	COVID_G2G3 vs Healthy	-1.40541	5.83073	17.0123	0.00012846	0.0011535
KDSR	COVID_G2G3 vs Healthy	-0.725112	4.45898	17.0006	0.000129191	0.00115849
VTA1	COVID_G2G3 vs Healthy	0.430761	5.26385	16.9852	0.000129939	0.0011636
PRKCSH	COVID_G2G3 vs Healthy	-0.329513	6.00353	16.9779	0.00013023	0.00116462
UBE2L6	COVID_G2G3 vs Healthy	1.21487	7.32047	16.9508	0.00013164	0.00117468
COX7A2	COVID_G2G3 vs Healthy	0.329503	7.93332	16.9493	0.000131713	0.00117468
FAM8A1	COVID_G2G3 vs Healthy	0.721053	4.68153	16.9397	0.000132457	0.00117536
C18orf32	COVID_G2G3 vs Healthy	0.301035	6.83918	16.9353	0.000132462	0.00117536
TMEM59	COVID_G2G3 vs Healthy	0.329679	7.6505	16.9345	0.000132497	0.00117536
GPD2	COVID_G2G3 vs Healthy	0.746295	5.02371	16.9371	0.000132505	0.00117536
FRMD4B	COVID_G2G3 vs Healthy	-0.687335	5.09847	16.9286	0.000132878	0.00117707
HMGB1	COVID_G2G3 vs Healthy	-0.251303	9.0661	16.9073	0.00013395	0.00118497
TRIM38	COVID_G2G3 vs Healthy	0.356984	7.59812	16.8968	0.000134517	0.00118839
CRYBG1	COVID_G2G3 vs Healthy	0.395969	6.17308	16.8871	0.000135069	0.00119166
FAS	COVID_G2G3 vs Healthy	0.824874	4.7833	16.8731	0.000135982	0.0011981
NDUFA3	COVID_G2G3 vs Healthy	0.435408	6.96289	16.8566	0.000136707	0.00120288
ANP32A	COVID_G2G3 vs Healthy	0.264344	7.64829	16.844	0.000137398	0.00120734
AP5B1	COVID_G2G3 vs Healthy	0.502005	6.62702	16.8297	0.000138198	0.00121274
KCTD20	COVID_G2G3 vs Healthy	-0.427385	5.9084	16.8175	0.000138891	0.0012172
RSRC2	COVID_G2G3 vs Healthy	0.302981	7.36365	16.8053	0.000139553	0.00122137
ABT1	COVID_G2G3 vs Healthy	0.322415	4.81555	16.8028	0.000139803	0.00122193
ALDH2	COVID_G2G3 vs Healthy	-0.539172	8.07206	16.7925	0.000140268	0.00122436
COX6B1	COVID_G2G3 vs Healthy	0.262041	8.70098	16.7705	0.000141513	0.00123359
SHKBP1	COVID_G2G3 vs Healthy	0.399456	6.96309	16.7651	0.000141825	0.00123467
ARID1B	COVID_G2G3 vs Healthy	-0.304632	7.10368	16.7448	0.000142989	0.00124315
PTDSS1	COVID_G2G3 vs Healthy	-0.474776	5.25561	16.7288	0.000143965	0.00124998
LACC1	COVID_G2G3 vs Healthy	0.700147	4.45066	16.6796	0.000147055	0.00127387
NFE2	COVID_G2G3 vs Healthy	0.731549	6.38053	16.6726	0.000147224	0.00127387
ANP32B	COVID_G2G3 vs Healthy	-0.353055	7.80487	16.6709	0.000147298	0.00127387
GMIP	COVID_G2G3 vs Healthy	0.440461	6.00496	16.6621	0.000147849	0.00127695
NTNG2	COVID_G2G3 vs Healthy	0.999419	3.95789	16.6296	0.000150167	0.00129504
MOB1A	COVID_G2G3 vs Healthy	0.315313	8.38038	16.6181	0.000150465	0.00129504
RBM39	COVID_G2G3 vs Healthy	-0.320081	8.78295	16.6169	0.000150535	0.00129504
RTN1	COVID_G2G3 vs Healthy	-1.26652	4.94757	16.6011	0.000151615	0.00130262
TUFM	COVID_G2G3 vs Healthy	-0.389674	6.76256	16.5874	0.000152347	0.00130719
ITGAE	COVID_G2G3 vs Healthy	-0.701965	5.24507	16.5637	0.000153857	0.00131843
TOMM20	COVID_G2G3 vs Healthy	-0.457933	7.35553	16.5298	0.000155923	0.00133439
UTP3	COVID_G2G3 vs Healthy	0.420611	5.1327	16.5231	0.000156513	0.0013377
TCIRG1	COVID_G2G3 vs Healthy	0.411968	7.46276	16.5113	0.00015709	0.00134088
PEX26	COVID_G2G3 vs Healthy	-0.44224	4.56011	16.4832	0.000159133	0.00135656
BICD2	COVID_G2G3 vs Healthy	-0.366991	6.13145	16.4567	0.000160616	0.00136743
MCL1	COVID_G2G3 vs Healthy	-0.418265	9.79408	16.437	0.000161871	0.00137632
TRAPPC1	COVID_G2G3 vs Healthy	0.335703	7.48516	16.4023	0.000164161	0.00139399
TENT5A	COVID_G2G3 vs Healthy	0.68211	6.35091	16.3924	0.000164846	0.001395
GRB2	COVID_G2G3 vs Healthy	0.312005	8.37046	16.389	0.000165048	0.001395
SLC30A5	COVID_G2G3 vs Healthy	-0.406064	4.58807	16.3905	0.000165115	0.001395
NKG7	COVID_G2G3 vs Healthy	2.18849	5.72408	16.3905	0.00016513	0.001395
GIMAP7	COVID_G2G3 vs Healthy	1.09365	7.67068	16.369	0.000166392	0.00140354
SLC35F5	COVID_G2G3 vs Healthy	-0.348058	4.94439	16.3687	0.000166569	0.00140354
RPS10	COVID_G2G3 vs Healthy	-0.64263	8.77113	16.3393	0.000168401	0.00141572
CGAS	COVID_G2G3 vs Healthy	0.706506	5.60895	16.3381	0.000168559	0.00141572
MARCO	COVID_G2G3 vs Healthy	1.37692	5.53828	16.3361	0.000168684	0.00141572
KLF13	COVID_G2G3 vs Healthy	-0.279944	7.37411	16.3324	0.000168877	0.00141572
HMGA1	COVID_G2G3 vs Healthy	-0.54338	5.54477	16.3236	0.000169513	0.00141924
COX6A1	COVID_G2G3 vs Healthy	0.304652	8.04814	16.2889	0.000171877	0.0014372
UBLCP1	COVID_G2G3 vs Healthy	0.414397	5.08215	16.2734	0.000173126	0.00144472
GSDMD	COVID_G2G3 vs Healthy	0.680321	6.10644	16.27	0.000173217	0.00144472
CAPN2	COVID_G2G3 vs Healthy	0.347236	7.63588	16.2392	0.000175374	0.00145853
LAMP2	COVID_G2G3 vs Healthy	0.341444	7.4639	16.2386	0.000175417	0.00145853
CNIH1	COVID_G2G3 vs Healthy	-0.482004	6.16347	16.2371	0.000175539	0.00145853
FAM104A	COVID_G2G3 vs Healthy	0.407458	4.50886	16.2375	0.000175768	0.00145858
YY1	COVID_G2G3 vs Healthy	-0.215383	7.49016	16.2077	0.000177635	0.00147222
SECTM1	COVID_G2G3 vs Healthy	0.755532	6.83036	16.2015	0.000178086	0.00147248
MYO5A	COVID_G2G3 vs Healthy	-0.402147	5.9325	16.2013	0.000178115	0.00147248
CDC27	COVID_G2G3 vs Healthy	0.368823	4.91391	16.1875	0.000179248	0.00147998
GCH1	COVID_G2G3 vs Healthy	0.89766	6.40239	16.1718	0.00018025	0.00148638
TOMM22	COVID_G2G3 vs Healthy	-0.305767	6.15547	16.168	0.000180534	0.00148685
RSL1D1	COVID_G2G3 vs Healthy	-0.439202	7.16079	16.1423	0.000182411	0.00150043
NSL1	COVID_G2G3 vs Healthy	0.479545	5.73952	16.1047	0.000185273	0.00152189
GNPDA1	COVID_G2G3 vs Healthy	0.539353	4.92309	16.1038	0.000185483	0.00152189
PFDN5	COVID_G2G3 vs Healthy	-0.283315	10.2153	16.0948	0.000185964	0.00152393
LYPLA2	COVID_G2G3 vs Healthy	0.389809	5.21717	16.0852	0.000186769	0.00152801
SCARB2	COVID_G2G3 vs Healthy	0.560705	6.52134	16.0823	0.000186928	0.00152801
AL121933.2	COVID_G2G3 vs Healthy	0.616037	4.81148	16.0462	0.000189805	0.0015496
MRPL46	COVID_G2G3 vs Healthy	0.696146	3.77722	16.0357	0.000191028	0.00155765
SNHG9	COVID_G2G3 vs Healthy	-0.502951	4.37169	16.0031	0.00019332	0.00157438
MRPS18A	COVID_G2G3 vs Healthy	0.552802	4.2556	15.916	0.000200459	0.0016305
SIGLEC7	COVID_G2G3 vs Healthy	0.578061	5.12805	15.9006	0.000201433	0.00163639
MAT2A	COVID_G2G3 vs Healthy	-0.574822	6.16685	15.881	0.000202905	0.00164484
RGCC	COVID_G2G3 vs Healthy	-1.18095	6.32173	15.8778	0.00020318	0.00164484
KPNA4	COVID_G2G3 vs Healthy	-0.291952	6.34466	15.8771	0.000203224	0.00164484
SLC16A6	COVID_G2G3 vs Healthy	0.624004	5.47305	15.8537	0.000205258	0.00165925
ZYX	COVID_G2G3 vs Healthy	0.443391	7.54384	15.8121	0.000208679	0.00168451
RNF5	COVID_G2G3 vs Healthy	0.405181	4.76166	15.8115	0.000208895	0.00168451
CCDC90B	COVID_G2G3 vs Healthy	0.435671	5.22585	15.7697	0.000212428	0.00171089
AP1S1	COVID_G2G3 vs Healthy	0.513869	4.51708	15.7538	0.000213945	0.001721
MBNL2	COVID_G2G3 vs Healthy	-0.82967	4.41776	15.7512	0.000214296	0.00172171
MICB	COVID_G2G3 vs Healthy	0.828985	4.20653	15.7481	0.00021472	0.00172301
RPL31	COVID_G2G3 vs Healthy	-0.419792	9.30878	15.7307	0.000215734	0.00172903
MT-ND3	COVID_G2G3 vs Healthy	-0.661224	12.5197	15.7209	0.000216605	0.00173389
CD79B	COVID_G2G3 vs Healthy	0.918746	3.85472	15.7222	0.000217098	0.00173415
ZC3H14	COVID_G2G3 vs Healthy	-0.453458	4.4356	15.7185	0.000217165	0.00173415
ARHGAP18	COVID_G2G3 vs Healthy	0.546667	5.26118	15.7032	0.00021834	0.00174134
ATP1B3	COVID_G2G3 vs Healthy	-0.380074	7.05754	15.6986	0.000218597	0.00174134
UPF2	COVID_G2G3 vs Healthy	0.323239	5.63829	15.6722	0.000221029	0.00175859
SOS2	COVID_G2G3 vs Healthy	-0.396907	6.24366	15.5844	0.000229089	0.00182051
EXOSC9	COVID_G2G3 vs Healthy	0.661485	4.60629	15.5797	0.000229861	0.00182444
CCR1	COVID_G2G3 vs Healthy	0.89669	7.55362	15.5675	0.000230665	0.00182806
GNL3L	COVID_G2G3 vs Healthy	-0.400398	5.52918	15.566	0.000230874	0.00182806
AC005280.2	COVID_G2G3 vs Healthy	-0.842148	4.1431	15.5624	0.000231502	0.00182969
WDFY2	COVID_G2G3 vs Healthy	-0.370738	6.85687	15.5573	0.000231638	0.00182969
PPP1CB	COVID_G2G3 vs Healthy	-0.408133	7.85762	15.5488	0.000232433	0.00183376
PLEKHF2	COVID_G2G3 vs Healthy	0.423842	5.41142	15.5361	0.000233751	0.00184068
ATP5F1A	COVID_G2G3 vs Healthy	-0.436817	7.44354	15.5338	0.00023387	0.00184068
STAT1	COVID_G2G3 vs Healthy	1.3219	8.0185	15.5153	0.000235655	0.0018525
PLAGL2	COVID_G2G3 vs Healthy	0.709555	5.52236	15.5019	0.000237027	0.00186106
SMARCC1	COVID_G2G3 vs Healthy	-0.304365	5.99317	15.4931	0.000237845	0.00186445
FAM20A	COVID_G2G3 vs Healthy	3.28825	3.88415	15.3407	0.000238027	0.00186445
GRIPAP1	COVID_G2G3 vs Healthy	0.411383	5.74746	15.4758	0.000239559	0.00187421
PITPNB	COVID_G2G3 vs Healthy	-0.343476	5.12104	15.4644	0.000240742	0.00188122
HES4	COVID_G2G3 vs Healthy	1.90485	4.79655	15.4463	0.00024324	0.00189849
NDUFB4	COVID_G2G3 vs Healthy	0.276327	7.10267	15.4292	0.000244149	0.00190332
RRAGA	COVID_G2G3 vs Healthy	0.388759	4.99369	15.4244	0.00024476	0.00190582
SLC27A3	COVID_G2G3 vs Healthy	0.536278	5.91596	15.3949	0.000247639	0.00192595
DDX54	COVID_G2G3 vs Healthy	-0.400047	4.8562	15.3721	0.000250078	0.00194261
MTX1	COVID_G2G3 vs Healthy	0.333058	5.89246	15.3669	0.000250519	0.00194375
DRAM1	COVID_G2G3 vs Healthy	0.492482	5.08158	15.3568	0.000251669	0.00195036
AHCYL1	COVID_G2G3 vs Healthy	-0.236954	6.18319	15.3204	0.000255359	0.00197662
RAB2A	COVID_G2G3 vs Healthy	0.273122	7.23115	15.3017	0.000257312	0.0019894
UBR5	COVID_G2G3 vs Healthy	-0.3061	5.94678	15.2957	0.000257981	0.00199222
LILRB4	COVID_G2G3 vs Healthy	0.783159	6.65422	15.2767	0.000259981	0.00200315
ZNF267	COVID_G2G3 vs Healthy	0.367305	5.9245	15.2737	0.000260333	0.00200315
TMEM50A	COVID_G2G3 vs Healthy	0.334707	7.38128	15.2727	0.000260406	0.00200315
CYTH2	COVID_G2G3 vs Healthy	-0.435557	4.651	15.2724	0.000260617	0.00200315
PMPCA	COVID_G2G3 vs Healthy	-0.423939	4.32484	15.2685	0.000261208	0.00200535
HEG1	COVID_G2G3 vs Healthy	1.2598	3.65165	15.261	0.000262305	0.00201142
GIMAP1	COVID_G2G3 vs Healthy	0.609184	6.91163	15.251	0.000262754	0.00201251
PIAS4	COVID_G2G3 vs Healthy	0.397556	4.10238	15.2239	0.000266336	0.00203756
TMEM199	COVID_G2G3 vs Healthy	0.377088	4.69176	15.2091	0.000267556	0.00204451
HIPK3	COVID_G2G3 vs Healthy	-0.365777	7.46501	15.2041	0.000267887	0.00204466
HNRNPAB	COVID_G2G3 vs Healthy	-0.382166	6.31775	15.1991	0.000268445	0.00204654
C1QBP	COVID_G2G3 vs Healthy	-0.464546	6.15058	15.1851	0.000270005	0.00205463
HNRNPM	COVID_G2G3 vs Healthy	-0.277379	7.30128	15.1838	0.000270132	0.00205463
NMT1	COVID_G2G3 vs Healthy	0.379432	5.71294	15.1704	0.000271706	0.00206421
R3HCC1	COVID_G2G3 vs Healthy	-0.367979	4.27349	15.1689	0.000272133	0.00206507
GAS6	COVID_G2G3 vs Healthy	1.12685	4.2533	15.1595	0.000273367	0.00207203
MRPL16	COVID_G2G3 vs Healthy	0.357369	5.25452	15.1484	0.000274219	0.00207377
AIP	COVID_G2G3 vs Healthy	0.318683	6.06645	15.1476	0.000274229	0.00207377
TMSB10	COVID_G2G3 vs Healthy	0.368371	12.4337	15.1396	0.000275106	0.00207801
GBA	COVID_G2G3 vs Healthy	0.533241	4.66506	15.1289	0.000276733	0.0020879
SMS	COVID_G2G3 vs Healthy	-0.311893	6.01048	15.0813	0.000281853	0.00212409
FOXO1	COVID_G2G3 vs Healthy	-0.767533	4.58161	15.069	0.000283534	0.00213431
WAS	COVID_G2G3 vs Healthy	0.295938	7.68062	15.0377	0.000286957	0.00215569
FBXO22	COVID_G2G3 vs Healthy	0.557606	4.05829	15.0432	0.000287031	0.00215569
HERPUD1	COVID_G2G3 vs Healthy	-0.551507	7.63304	15.0285	0.000288057	0.00216092
NPL	COVID_G2G3 vs Healthy	0.535053	5.95566	15.0022	0.000291258	0.00218244
MIA2	COVID_G2G3 vs Healthy	0.269385	5.72021	14.9821	0.00029371	0.00219831
SGK1	COVID_G2G3 vs Healthy	-0.874488	7.76037	14.9777	0.000294184	0.00219934
AC118549.1	COVID_G2G3 vs Healthy	-0.538139	4.23512	14.9721	0.000295428	0.00220613
DKC1	COVID_G2G3 vs Healthy	-0.428972	4.54887	14.9668	0.000295833	0.00220665
CSNK2A2	COVID_G2G3 vs Healthy	-0.348028	5.11935	14.9538	0.00029726	0.00221477
TRIO	COVID_G2G3 vs Healthy	-0.518885	5.04771	14.9468	0.000298143	0.00221883
NT5C2	COVID_G2G3 vs Healthy	0.486532	5.84251	14.9302	0.000300119	0.00223071
RABL6	COVID_G2G3 vs Healthy	-0.368611	5.72296	14.9275	0.000300419	0.00223071
MT-ATP8	COVID_G2G3 vs Healthy	-0.783608	7.08393	14.8873	0.000305431	0.00226537
PFKFB4	COVID_G2G3 vs Healthy	0.496383	4.60772	14.8853	0.000306089	0.00226768
RAP2C	COVID_G2G3 vs Healthy	0.36651	5.61828	14.8641	0.000308446	0.00228257
LDHB	COVID_G2G3 vs Healthy	-0.772817	6.08245	14.8534	0.000309792	0.00228837
POGZ	COVID_G2G3 vs Healthy	-0.352921	5.3826	14.8529	0.000309926	0.00228837
HTATSF1	COVID_G2G3 vs Healthy	-0.335996	5.16667	14.8248	0.000313583	0.00231277
PARP10	COVID_G2G3 vs Healthy	0.8644	4.84095	14.815	0.000314946	0.00232021
KLF3	COVID_G2G3 vs Healthy	-0.324221	7.11737	14.807	0.000315804	0.0023221
PNISR	COVID_G2G3 vs Healthy	-0.348175	7.90749	14.8061	0.00031591	0.0023221
AIM2	COVID_G2G3 vs Healthy	1.77137	3.99528	14.7736	0.000321232	0.00235858
MAP2K7	COVID_G2G3 vs Healthy	-0.361569	5.17245	14.7473	0.000323846	0.00237294
RETN	COVID_G2G3 vs Healthy	1.57009	8.23681	14.746	0.000323911	0.00237294
SRP72	COVID_G2G3 vs Healthy	-0.299715	6.7878	14.7389	0.000324887	0.00237743
TRAPPC5	COVID_G2G3 vs Healthy	0.313978	8.6011	14.7327	0.000325712	0.00238081
ZBTB44	COVID_G2G3 vs Healthy	-0.336889	5.46689	14.7293	0.000326269	0.00238223
SUMF2	COVID_G2G3 vs Healthy	-0.45996	4.9439	14.6883	0.00033195	0.00242102
STARD7	COVID_G2G3 vs Healthy	-0.335648	6.01555	14.6816	0.000332769	0.0024243
ADM	COVID_G2G3 vs Healthy	1.32971	4.93053	14.6622	0.000335702	0.00244296
COA8	COVID_G2G3 vs Healthy	-0.277278	5.23783	14.6141	0.000342318	0.00248834
CMPK1	COVID_G2G3 vs Healthy	-0.304866	6.2029	14.5954	0.000344927	0.00250453
BTG1	COVID_G2G3 vs Healthy	-0.415128	9.42455	14.5721	0.000348276	0.00252606
CTDSP1	COVID_G2G3 vs Healthy	-0.459235	7.00128	14.5654	0.000349251	0.00253034
UBASH3B	COVID_G2G3 vs Healthy	0.857327	4.19758	14.5499	0.000352295	0.00254957
TDP2	COVID_G2G3 vs Healthy	0.4342	4.65323	14.5342	0.000354317	0.00256139
MDM4	COVID_G2G3 vs Healthy	-0.262308	7.10281	14.5082	0.000357702	0.00258301
CHRAC1	COVID_G2G3 vs Healthy	-0.575345	5.74001	14.4907	0.00036038	0.00259949
AC091271.1	COVID_G2G3 vs Healthy	0.827055	4.53989	14.4852	0.000361607	0.00260547
NBN	COVID_G2G3 vs Healthy	0.396608	6.04674	14.4739	0.000362907	0.00261197
RASGRP2	COVID_G2G3 vs Healthy	0.29573	6.30488	14.4545	0.000365858	0.00263033
ECHDC1	COVID_G2G3 vs Healthy	-0.25774	6.45484	14.4497	0.000366581	0.00263264
PPP3CA	COVID_G2G3 vs Healthy	-0.305983	6.52404	14.4246	0.000370465	0.00265763
NDUFA7	COVID_G2G3 vs Healthy	0.380567	6.35396	14.4021	0.000373965	0.00267981
TMX4	COVID_G2G3 vs Healthy	-0.569551	6.36673	14.3876	0.000376236	0.00269314
OLA1	COVID_G2G3 vs Healthy	-0.387209	5.66741	14.3818	0.0003772	0.0026971
SRM	COVID_G2G3 vs Healthy	-0.596744	5.02382	14.3706	0.000379026	0.00270721
GAS7	COVID_G2G3 vs Healthy	-0.40776	7.37863	14.3596	0.000380664	0.00271328
C3orf38	COVID_G2G3 vs Healthy	0.454772	4.99054	14.361	0.000380702	0.00271328
CEPT1	COVID_G2G3 vs Healthy	0.368263	5.63533	14.3467	0.000382944	0.0027263
CHROMR	COVID_G2G3 vs Healthy	0.90175	4.01969	14.336	0.000385193	0.00273745
HMGN2	COVID_G2G3 vs Healthy	0.313317	8.12473	14.3304	0.000385345	0.00273745
POMP	COVID_G2G3 vs Healthy	0.444876	7.67043	14.2978	0.000390659	0.0027722
PYCARD	COVID_G2G3 vs Healthy	0.310325	8.97145	14.2949	0.000391125	0.00277251
DUSP22	COVID_G2G3 vs Healthy	-0.411449	5.95021	14.2921	0.000391641	0.00277317
ZDHHC12	COVID_G2G3 vs Healthy	0.420162	5.33227	14.2864	0.000392622	0.00277712
ABCB7	COVID_G2G3 vs Healthy	-0.42824	4.55588	14.2643	0.000396551	0.00280189
APP	COVID_G2G3 vs Healthy	-0.403698	5.84851	14.2205	0.000403611	0.0028482
OTUB1	COVID_G2G3 vs Healthy	0.255292	6.04028	14.2183	0.000403973	0.0028482
ZFAND1	COVID_G2G3 vs Healthy	-0.49914	4.52707	14.2111	0.000405526	0.00285609
HDHD5	COVID_G2G3 vs Healthy	-0.444468	4.58745	14.2042	0.000406553	0.00286025
ABHD14B	COVID_G2G3 vs Healthy	-0.580344	4.28827	14.1934	0.000408612	0.00287166
HIST1H1D	COVID_G2G3 vs Healthy	1.10168	5.01373	14.1675	0.000413198	0.00290078
DDX17	COVID_G2G3 vs Healthy	-0.275936	8.4038	14.1555	0.00041473	0.00290551
MCTP2	COVID_G2G3 vs Healthy	1.95362	4.37848	14.1292	0.000414756	0.00290551
ADAP2	COVID_G2G3 vs Healthy	0.447408	6.33986	14.1332	0.000418669	0.00292979
DDX49	COVID_G2G3 vs Healthy	-0.359191	4.83354	14.1119	0.000422594	0.00295411
SPG21	COVID_G2G3 vs Healthy	-0.274326	6.65458	14.0941	0.000425617	0.00297208
PARK7	COVID_G2G3 vs Healthy	-0.325183	7.70043	14.0872	0.000426836	0.00297523
TNFAIP8L2	COVID_G2G3 vs Healthy	0.446331	5.6675	14.087	0.000426976	0.00297523
PFKL	COVID_G2G3 vs Healthy	-0.389186	5.81828	14.0617	0.000431506	0.00300361
CLNS1A	COVID_G2G3 vs Healthy	-0.333623	6.18551	14.0541	0.000432864	0.00300987
CIITA	COVID_G2G3 vs Healthy	-0.844383	5.94593	14.0488	0.000433861	0.00301361
KCNK6	COVID_G2G3 vs Healthy	-0.483253	6.00797	14.025	0.000438231	0.00304075
SLC27A1	COVID_G2G3 vs Healthy	-0.610503	4.17742	14.0164	0.000440422	0.00305272
MPP1	COVID_G2G3 vs Healthy	0.32966	6.40502	14.0071	0.000441527	0.0030542
CUL1	COVID_G2G3 vs Healthy	0.977548	6.3082	14.007	0.000441565	0.0030542
THYN1	COVID_G2G3 vs Healthy	0.348812	4.7762	13.9968	0.000443687	0.00306564
A1BG	COVID_G2G3 vs Healthy	-0.965698	4.56496	13.9875	0.000445606	0.00307567
LYRM4	COVID_G2G3 vs Healthy	-0.557815	4.06672	13.9836	0.000446522	0.00307875
RBM23	COVID_G2G3 vs Healthy	-0.311116	6.22815	13.9718	0.000448159	0.00308679
CTSS	COVID_G2G3 vs Healthy	-0.272193	11.9569	13.9564	0.000451037	0.00310336
TRIM28	COVID_G2G3 vs Healthy	-0.29785	5.39555	13.9454	0.000453239	0.00311525
UBL3	COVID_G2G3 vs Healthy	-0.290634	6.30997	13.9282	0.00045649	0.00313431
TPST2	COVID_G2G3 vs Healthy	0.490931	6.03153	13.9248	0.000457181	0.00313577
JUND	COVID_G2G3 vs Healthy	-0.462315	10.5161	13.9178	0.00045846	0.00314126
SIKE1	COVID_G2G3 vs Healthy	0.352711	4.77394	13.9156	0.000459319	0.00314387
G3BP2	COVID_G2G3 vs Healthy	-0.320081	6.43795	13.9042	0.000461145	0.00315308
CSNK2B	COVID_G2G3 vs Healthy	0.228836	7.04662	13.88	0.000465859	0.00318199
CTSC	COVID_G2G3 vs Healthy	0.452344	7.5821	13.8647	0.000468878	0.00319929
TBC1D10B	COVID_G2G3 vs Healthy	0.308829	4.97495	13.8616	0.000469748	0.00320189
HLA-DMB	COVID_G2G3 vs Healthy	-0.763169	7.52596	13.8513	0.000471541	0.00321079
TSEN34	COVID_G2G3 vs Healthy	-0.394433	5.81438	13.8431	0.000473233	0.00321896
TOMM40	COVID_G2G3 vs Healthy	-0.620119	4.26396	13.8297	0.000476325	0.00323664
REEP4	COVID_G2G3 vs Healthy	0.514795	4.92382	13.8184	0.000478432	0.0032476
SEPTIN6	COVID_G2G3 vs Healthy	0.380057	5.96352	13.8135	0.000479209	0.00324951
PTTG1IP	COVID_G2G3 vs Healthy	0.36027	6.94253	13.7707	0.00048794	0.0033053
R3HDM4	COVID_G2G3 vs Healthy	0.404198	5.68348	13.7444	0.000493495	0.00333948
CHMP2A	COVID_G2G3 vs Healthy	0.272874	7.39514	13.6977	0.000503257	0.00340204
ANKRD22	COVID_G2G3 vs Healthy	2.54542	4.44455	13.6983	0.000503978	0.00340341
CD68	COVID_G2G3 vs Healthy	0.320098	8.84373	13.6874	0.000505462	0.00340992
CYB5A	COVID_G2G3 vs Healthy	0.672344	4.32273	13.6855	0.000506634	0.00341432
SLC25A33	COVID_G2G3 vs Healthy	-0.641825	4.26514	13.6795	0.000507782	0.00341561
ELMO2	COVID_G2G3 vs Healthy	0.714498	3.95676	13.6813	0.000507867	0.00341561
SLC35E1	COVID_G2G3 vs Healthy	-0.413361	5.29896	13.6724	0.000508846	0.00341869
DECR1	COVID_G2G3 vs Healthy	0.317223	6.71169	13.6602	0.00051135	0.00343201
HMOX1	COVID_G2G3 vs Healthy	0.622099	6.81646	13.6439	0.000514912	0.00345238
JMY	COVID_G2G3 vs Healthy	-0.543647	4.17527	13.6176	0.000521399	0.00349231
BTN3A1	COVID_G2G3 vs Healthy	0.704363	4.92047	13.6104	0.000522625	0.00349696
EXOSC4	COVID_G2G3 vs Healthy	0.586824	3.84048	13.6055	0.000524458	0.00350564
TOLLIP	COVID_G2G3 vs Healthy	0.335868	5.70332	13.5821	0.00052867	0.00353021
LIMK2	COVID_G2G3 vs Healthy	0.954298	4.24428	13.5621	0.000533823	0.00356099
ST8SIA4	COVID_G2G3 vs Healthy	0.431919	6.38886	13.5521	0.000535434	0.00356747
LLPH	COVID_G2G3 vs Healthy	0.329074	6.18587	13.5501	0.000535881	0.00356747
ZNF410	COVID_G2G3 vs Healthy	0.286071	4.58509	13.5283	0.000541345	0.00360019
TBC1D5	COVID_G2G3 vs Healthy	-0.312692	5.59369	13.5237	0.000542013	0.00360099
GOSR2	COVID_G2G3 vs Healthy	0.394463	4.70273	13.4929	0.000549465	0.0036454
PPP1R14B	COVID_G2G3 vs Healthy	-0.528785	5.92156	13.4894	0.000549914	0.0036454
IRF2BPL	COVID_G2G3 vs Healthy	0.64651	5.12027	13.489	0.000550365	0.0036454
IFNGR2	COVID_G2G3 vs Healthy	0.355443	7.71719	13.4692	0.000554616	0.00366708
AQP9	COVID_G2G3 vs Healthy	1.25184	6.15573	13.4689	0.000554754	0.00366708
SF3A1	COVID_G2G3 vs Healthy	-0.306411	5.45839	13.4503	0.000559231	0.00369295
PTPN18	COVID_G2G3 vs Healthy	-0.273791	6.68961	13.4457	0.000560237	0.00369588
IARS2	COVID_G2G3 vs Healthy	-0.323569	5.62419	13.4378	0.000562212	0.00370518
HEATR5A	COVID_G2G3 vs Healthy	-0.460539	4.23037	13.4373	0.000563132	0.0037064
API5	COVID_G2G3 vs Healthy	-0.256896	5.21482	13.4328	0.000563526	0.0037064
MGAT4B	COVID_G2G3 vs Healthy	-0.333921	4.86915	13.411	0.000568765	0.00373711
DPM1	COVID_G2G3 vs Healthy	0.312171	5.09849	13.4062	0.000569926	0.00373927
VAPA	COVID_G2G3 vs Healthy	-0.313095	7.71636	13.4041	0.000570233	0.00373927
CA5B	COVID_G2G3 vs Healthy	-0.462306	4.42538	13.4033	0.000570932	0.00374011
DAP3	COVID_G2G3 vs Healthy	-0.25432	5.62781	13.3971	0.000572029	0.00374357
DCTN6	COVID_G2G3 vs Healthy	0.328656	5.11418	13.3925	0.000573266	0.00374691
AKAP10	COVID_G2G3 vs Healthy	0.425591	5.63808	13.3909	0.000573681	0.00374691
PHACTR2	COVID_G2G3 vs Healthy	0.479926	6.67057	13.3808	0.000575979	0.00375818
TBL1X	COVID_G2G3 vs Healthy	-0.523707	5.94674	13.3777	0.000576764	0.00375956
CMAS	COVID_G2G3 vs Healthy	0.382567	4.90336	13.3691	0.000579167	0.00377148
MDH1	COVID_G2G3 vs Healthy	0.329461	6.10562	13.3636	0.000580229	0.00377465
DHRS4L2	COVID_G2G3 vs Healthy	-0.5065	5.7511	13.3553	0.000582313	0.00378446
SDF2	COVID_G2G3 vs Healthy	0.269923	5.65773	13.3336	0.000587757	0.00381606
AFG3L2	COVID_G2G3 vs Healthy	-0.46707	4.9624	13.3277	0.000589417	0.00381996
CNBP	COVID_G2G3 vs Healthy	0.246532	8.33692	13.3262	0.000589522	0.00381996
SH2D3C	COVID_G2G3 vs Healthy	0.525015	5.31614	13.3207	0.000591089	0.00382634
ATP5IF1	COVID_G2G3 vs Healthy	0.326459	7.20103	13.3143	0.000592544	0.00383198
SREK1	COVID_G2G3 vs Healthy	-0.288867	6.8079	13.3074	0.000594302	0.00383957
PPP2R2A	COVID_G2G3 vs Healthy	0.389807	5.83047	13.3046	0.000595072	0.00384076
ANAPC16	COVID_G2G3 vs Healthy	-0.365377	6.87712	13.2946	0.000597559	0.00385302
SDHD	COVID_G2G3 vs Healthy	0.370793	6.60788	13.2895	0.000598866	0.00385766
YLPM1	COVID_G2G3 vs Healthy	-0.410242	5.08627	13.2857	0.000600119	0.00385983
GART	COVID_G2G3 vs Healthy	0.41629	4.59909	13.2862	0.000600379	0.00385983
SRP19	COVID_G2G3 vs Healthy	0.307239	6.25203	13.2764	0.000602267	0.00386532
NOL12	COVID_G2G3 vs Healthy	0.380117	4.85754	13.2768	0.000602411	0.00386532
EZH1	COVID_G2G3 vs Healthy	-0.501251	4.91791	13.2653	0.000605425	0.00388087
PSMB9	COVID_G2G3 vs Healthy	0.973686	8.16166	13.2578	0.000607024	0.00388444
MASTL	COVID_G2G3 vs Healthy	0.574448	3.86022	13.2625	0.000607166	0.00388444
C16orf54	COVID_G2G3 vs Healthy	-0.404458	6.1678	13.2505	0.000608968	0.00389218
NR4A2	COVID_G2G3 vs Healthy	-0.824643	7.65247	13.222	0.000616417	0.00393596
ZC3HAV1	COVID_G2G3 vs Healthy	0.475947	6.71477	13.2171	0.000617737	0.00394055
YIPF1	COVID_G2G3 vs Healthy	0.484306	4.40481	13.2099	0.00062042	0.00395383
NAP1L4	COVID_G2G3 vs Healthy	-0.285248	5.54917	13.2044	0.000621175	0.00395479
CYFIP2	COVID_G2G3 vs Healthy	0.454526	4.90091	13.1857	0.000626405	0.00398423
IGF1R	COVID_G2G3 vs Healthy	-0.729333	4.10868	13.1822	0.000628098	0.00399113
SRRM2	COVID_G2G3 vs Healthy	-0.269174	8.29855	13.1645	0.000631783	0.00401066
GLRX	COVID_G2G3 vs Healthy	0.360763	8.58128	13.1579	0.000633569	0.00401811
GOLIM4	COVID_G2G3 vs Healthy	-0.36978	4.55843	13.1496	0.000636373	0.004032
SNX6	COVID_G2G3 vs Healthy	0.323378	7.23768	13.1377	0.000639083	0.00404526
ATXN10	COVID_G2G3 vs Healthy	-0.313947	5.53548	13.1314	0.000640909	0.00405292
DDX3X	COVID_G2G3 vs Healthy	-0.303395	8.77018	13.0832	0.000654196	0.00413296
SEL1L	COVID_G2G3 vs Healthy	-0.307835	6.02166	13.0748	0.000656631	0.00414435
LAMTOR2	COVID_G2G3 vs Healthy	0.262932	7.23354	13.0696	0.000658053	0.00414934
CCND3	COVID_G2G3 vs Healthy	0.545209	7.12721	13.066	0.000659054	0.00415166
TMED1	COVID_G2G3 vs Healthy	0.436217	4.56369	12.96	0.000690251	0.00434075
ARIH2	COVID_G2G3 vs Healthy	-0.254781	5.41397	12.9584	0.000690393	0.00434075
PTPA	COVID_G2G3 vs Healthy	0.534916	4.69372	12.9364	0.000697362	0.00438037
CIAO2B	COVID_G2G3 vs Healthy	0.262388	6.68177	12.929	0.000699068	0.0043844
TIMM13	COVID_G2G3 vs Healthy	-0.332919	6.19677	12.9282	0.00069934	0.0043844
PDXDC1	COVID_G2G3 vs Healthy	-0.308583	4.66602	12.9269	0.000700158	0.00438476
DTD1	COVID_G2G3 vs Healthy	-0.605958	4.10044	12.9261	0.000700734	0.00438476
GNG5	COVID_G2G3 vs Healthy	0.293907	8.57539	12.8886	0.000711317	0.00444575
[truncated: 28,463 more rows]

## Sheet: CD16+ Monocyte
Gene	Comparison	logFC	logCPM	F	PValue	p.adjusted
[truncated: 17,879 more rows]

[truncated: 14 more sheets: CD56dim NK, CD56bright NK, Naive CD8+ T, GZMKhi CD8+ T, MAIT, CD8- γδ T, CD8+ γδ T, Naive CD4+ T, CD4+ TCM, Merged Memory CD4+ T, Naive Treg, Naive B, TrB, Memory B]
