# Supplementary material for: Infants display reduced NK cell responses in RSV and increased inflammatory responses in SARS-CoV-2 infections
Source: Research Square preprint supplement (doi:10.21203/rs.3.rs-5640872/v1), 2025-01-13
Supplement: Supplementary file 2 [file 226cca4a46ec15b5af923a28.xlsx]

## Sheet: Index
Sheet Name	Description
Clinical Group Legend	Legend of clinical group labels used in this table
Summary	Summary of the number of DA peaks detected for each cell type.
COVID_G2G3 vs Healthy	COVID-19 (Moderate/Severe, No steroid) vs Healthy DA peaks
RSV_G1G2G3 vs Healthy	RSV (Mild/Moderate/Severe) vs Healthy DA peaks
COVID_G1 vs Healthy	Subacute COVID-19 vs Healthy DA peaks
RSV_G1G2G3 vs COVID_G2G3	Mild/Moderate/Severe RSV vs Moderate/Severe COVID-19 DA peaks
COVID_G3_S vs COVID_G3	Severe COVID-19 (Steroid Treated) vs Severe COVID-19 (Untreated) DA peaks
CD14+ Monocyte	DA peaks within CD14+ monocytes for all pairwise comparisons up to 25% FDR
CD16+ Monocyte	DA peaks within CD16+ monocytes for all pairwise comparisons up to 25% FDR
CD56dim NK	DA peaks within CD56dim NK cells for all pairwise comparisons up to 25% FDR
CD56bright NK	DA peaks within CD56bright NK cells for all pairwise comparisons up to 25% FDR
Naive CD8+ T	DA peaks within naive CD8+ T cells for all pairwise comparisons up to 25% FDR
GZMKhi CD8+ T	DA peaks within GZMKhi CD8+ T cells for all pairwise comparisons up to 25% FDR
Naive CD4+ T	DA peaks within naive CD4+ T cells for all pairwise comparisons up to 25% FDR
CD4+ TCM	DA peaks within CD4+ TCM cells for all pairwise comparisons up to 25% FDR
Naive Treg	DA peaks within naive treg cells for all pairwise comparisons up to 25% FDR
Naive B	DA peaks within naive B cells for all pairwise comparisons up to 25% FDR
TrB	DA peaks within transitional B cells for all pairwise comparisons up to 25% FDR

## Sheet: Clinical Group Legend
Clinical Group	Description
COVID_G1	Subacute COVID-19
COVID_G2	Moderate COVID-19
COVID_G3	Severe COVID-19
COVID_G3_S	Severe T COVID-19 (Steroid Treated)
RSV_G1	Mild RSV
RSV_G2	Moderate RSV
RSV_G3	Severe RSV
COVID_G2G3	Moderate+Severe COVID-19 (No Steroid Treatment)
RSV_G1G2G3	Mild+Moderate+Severe RSV
CD14+	Monocyte

## Sheet: Summary
Cell Lineage	Annotation	DA Direction	Main Healthy Comparisons: # DA Peaks			RSV vs COVID Comparisons: # DA Peaks	Steroid Treatment Comparison: #DA Peaks	Other Pairwise Comparisons: # DA Peaks
			COVID_G2G3 vs Healthy	RSV_G1G2G3 vs Healthy	COVID_G1 vs Healthy	RSV_G1G2G3 vs COVID_G2G3	COVID_G3_S vs COVID_G3	COVID_G2 vs COVID_G1	COVID_G3_S vs COVID_G1	COVID_G3 vs COVID_G1	RSV_G1 vs COVID_G1	RSV_G2 vs COVID_G1	RSV_G3 vs COVID_G1	COVID_G3_S vs COVID_G2	COVID_G3 vs COVID_G2	RSV_G1 vs COVID_G2	RSV_G2 vs COVID_G2	RSV_G3 vs COVID_G2	RSV_G1 vs COVID_G3_S	RSV_G2 vs COVID_G3_S	RSV_G3 vs COVID_G3_S	RSV_G1 vs COVID_G3	RSV_G2 vs COVID_G3	RSV_G3 vs COVID_G3	COVID_G2 vs Healthy	COVID_G3_S vs Healthy	COVID_G3 vs Healthy	RSV_G1 vs Healthy	RSV_G2 vs Healthy	RSV_G3 vs Healthy	RSV_G2 vs RSV_G1	RSV_G3 vs RSV_G1	RSV_G3 vs RSV_G2
Myeloid	CD14+ Monocyte	Opening	745	407	0	0	29	2	154	4	1	0	0	431	5	0	8	0	61	52	7	0	0	0	285	550	383	3	504	468	0	0	0
		Closing	1205	389	0	0	10	4	21	1	0	0	0	199	0	0	7	0	132	178	132	0	3	0	375	268	234	0	545	556	6	0	0
	CD16+ Monocyte	Opening	357	114	0	0	0	12	0	0	0	0	0	0	0	1	1	0	0	0	0	0	0	0	334	0	0	9	188	0	0	0	0
		Closing	651	105	0	0	0	26	0	3	0	1	0	0	0	0	2	0	0	0	0	0	0	0	663	0	0	1	283	0	2	0	0
	DC	Opening	0	0	0	0	0	0	0	0	0	0	0	0	0	0	0	0	0	0	0	0	0	0	0	0	0	0	0	0	0	0	0
		Closing	0	0	0	0	0	0	0	0	0	0	0	0	0	0	0	0	0	0	0	0	0	0	0	0	0	0	0	0	0	0	0
	pDC	Opening	0	0	0	0	0	0	0	0	0	0	0	0	0	0	0	0	0	0	0	0	0	0	0	0	0	0	0	0	0	0	0
		Closing	0	0	0	0	0	0	0	0	0	0	0	0	0	0	0	0	0	0	0	0	0	0	0	0	0	0	0	0	0	0	0
NK	CD56dim NK	Opening	11	8	2	0	10	0	78	0	1	0	0	108	0	0	0	0	19	2	2	0	0	0	4	183	1	8	8	1	2	0	0
		Closing	2	13	1	0	4	0	1	1	0	1	0	4	0	0	0	0	163	70	33	0	0	0	4	29	0	5	12	0	5	0	0
	CD56bright NK	Opening	3	7	0	8	0	0	0	0	0	0	0	0	0	0	0	0	0	0	0	0	0	0	0	0	0	0	0	0	0	0	0
		Closing	8	3	0	3	0	0	0	0	0	0	0	0	0	0	0	0	0	0	0	0	0	0	0	0	0	0	0	0	0	0	0
CD8+ & Unconventional T	Naive CD8+ T	Opening	2	13	1	0	32	0	272	17	1	0	1	197	19	0	0	0	19	5	40	1	0	1	0	539	23	3	20	2	0	0	1
		Closing	2	30	0	0	3	0	48	13	0	0	0	9	2	0	0	0	214	102	240	2	2	2	0	198	23	0	42	0	0	1	1
	GZMKhi CD8+ T	Opening	0	0	0	0	0	0	0	0	0	0	0	0	0	0	0	0	0	0	0	0	0	0	0	0	0	0	0	0	0	1	0
		Closing	0	0	0	0	0	0	0	0	0	0	0	0	0	0	0	0	0	0	0	0	0	0	0	0	0	0	0	0	0	0	0
	CD8+ TEMRA	Opening	0	0	0	0	0	0	0	0	0	0	0	0	0	0	0	0	0	0	0	0	0	0	0	0	0	0	0	0	0	0	0
		Closing	0	0	0	0	0	0	0	0	0	0	0	0	0	0	0	0	0	0	0	0	0	0	0	0	0	0	0	0	0	0	0
	MAIT	Opening	0	0	0	0	0	0	0	0	0	0	0	0	0	0	0	0	0	0	0	0	0	0	0	0	0	0	0	0	0	0	0
		Closing	0	0	0	0	0	0	0	0	0	0	0	0	0	0	0	0	0	0	0	0	0	0	0	0	0	0	0	0	0	0	0
	CD8- γδ T	Opening	0	0	0	0	0	0	0	0	0	0	0	0	0	0	0	0	0	0	0	0	0	0	0	0	0	0	0	0	0	0	0
		Closing	0	0	0	0	0	0	0	0	0	0	0	0	0	0	0	0	0	0	0	0	0	0	0	0	0	0	0	0	0	0	0
	CD8+ γδ T	Opening	0	0	0	0	0	0	0	0	0	0	0	0	0	0	0	0	0	0	0	0	0	0	0	0	0	0	0	0	0	0	0
		Closing	0	0	0	0	0	0	0	0	0	0	0	0	0	0	0	0	0	0	0	0	0	0	0	0	0	0	0	0	0	0	0
CD4+ T	Naive CD4+ T	Opening	30	80	1	0	81	0	411	1	1	0	0	575	8	0	0	0	169	26	64	0	0	2	1	1603	67	2	96	3	0	1	2
		Closing	15	69	0	1	2	1	84	0	0	1	1	118	0	0	1	0	585	252	399	0	4	2	2	1555	21	0	187	0	2	0	0
	CD4+ TCM	Opening	2	19	2	0	0	0	0	3	5	0	0	0	0	0	2	0	0	0	0	0	0	0	1	0	3	1	3	1	0	0	0
		Closing	0	11	1	0	0	0	0	0	2	0	0	0	0	1	0	0	0	0	0	0	3	2	0	0	0	2	5	1	0	0	0
	Tfh	Opening	0	0	0	0	0	0	0	0	0	0	0	0	0	0	0	0	0	0	0	0	0	0	0	0	0	0	0	0	0	0	0
		Closing	0	0	0	0	0	0	0	0	0	0	0	0	0	0	0	0	0	0	0	0	0	0	0	0	0	0	0	0	0	0	0
	Naive Treg	Opening	0	5	0	0	0	0	0	0	0	0	0	0	0	0	0	1	0	0	0	0	0	0	0	0	0	0	4	0	0	0	0
		Closing	0	4	1	0	0	1	0	0	0	0	0	0	0	1	0	0	0	0	0	1	0	0	4	0	0	0	4	0	0	0	0
	Memory Treg	Opening	0	0	0	0	0	0	0	0	0	0	0	0	0	0	0	0	0	0	0	0	0	0	0	0	0	0	0	0	0	0	0
		Closing	0	0	0	0	0	0	0	0	0	0	0	0	0	0	0	0	0	0	0	0	0	0	0	0	0	0	0	0	0	0	0
B Cell	Naive B	Opening	15	164	0	0	26	0	144	1	0	0	0	212	0	0	0	1	26	4	8	0	0	0	0	605	5	7	207	2	0	0	0
		Closing	22	219	0	0	1	0	16	0	0	0	0	11	0	0	1	0	168	99	94	0	0	0	9	301	0	8	285	3	0	0	0
	TrB	Opening	62	25	3	2	0	1	0	3	3	0	0	0	0	7	4	2	0	0	0	4	0	0	64	0	10	5	22	5	1	0	0
		Closing	184	29	1	2	0	11	0	0	4	2	1	0	0	1	4	1	0	0	0	2	9	0	186	0	2	3	44	5	11	2	0
	Memory B	Opening	0	0	0	0	0	0	0	0	0	0	0	0	0	0	0	0	0	0	0	0	0	0	0	0	0	0	0	0	0	0	0
		Closing	0	0	0	0	0	0	0	0	0	0	0	0	0	0	0	0	0	0	0	0	0	0	0	0	0	0	0	0	0	0	0
	AIM2hi Memory B	Opening	0	0	0	0	0	0	0	0	0	0	0	0	0	0	0	0	0	0	0	0	0	0	0	0	0	0	0	0	0	0	0
		Closing	0	0	0	0	0	0	0	0	0	0	0	0	0	0	0	0	0	0	0	0	0	0	0	0	0	0	0	0	0	0	0
	DN2 B	Opening	0	0	0	0	0	0	0	0	0	0	0	0	0	0	0	0	0	0	0	0	0	0	0	0	0	0	0	0	0	0	0
		Closing	0	0	0	0	0	0	0	0	0	0	0	0	0	0	0	0	0	0	0	0	0	0	0	0	0	0	0	0	0	0	0
	Plasmablast	Opening	0	0	0	0	0	0	0	0	0	0	0	0	0	0	0	0	0	0	0	0	0	0	0	0	0	0	0	0	0	0	0
		Closing	0	0	0	0	0	0	0	0	0	0	0	0	0	0	0	0	0	0	0	0	0	0	0	0	0	0	0	0	0	0	0
Other	Erythroblast	Opening	0	0	0	0	0	0	0	0	0	0	0	0	0	0	0	0	0	0	0	0	0	0	0	0	0	0	0	0	0	0	0
		Closing	0	0	0	0	0	0	0	0	0	0	0	0	0	0	0	0	0	0	0	0	0	0	0	0	0	0	0	0	0	0	0
	ILC2	Opening	0	0	0	0	0	0	0	0	0	0	0	0	0	0	0	0	0	0	0	0	0	0	0	0	0	0	0	0	0	0	0
		Closing	0	0	0	0	0	0	0	0	0	0	0	0	0	0	0	0	0	0	0	0	0	0	0	0	0	0	0	0	0	0	0
DA: Differential Accessibility
EdgeR Processing
Minimum # of Cells to Include Sample	50
% of cells expressing gene in at least 3 samples	0
Minimum # of samples in group for comparison	3
Covariates
Batch
Age
Sex
DA Peak Selection
logFC	> 0.5
FDR	< 5%

## Sheet: COVID_G2G3 vs Healthy
Peak	chr	start	end	Peak Length	Nearest Expressed Gene	Distance	Cell Type	logFC	logCPM	F	PValue	p.adjusted
chr10_124224342_124227885	chr10	124224342	124227885	3544	CHST15	130744	CD14+ Monocyte	1.54485	4.29772	54.9669	1.69244e-09	7.16397e-05
chr11_355183_356450	chr11	355183	356450	1268	IFITM3	34323	CD14+ Monocyte	2.06434	3.64283	52.9802	2.49738e-09	7.16397e-05
chr10_124229919_124232383	chr10	124229919	124232383	2465	CHST15	136321	CD14+ Monocyte	1.51734	3.76651	46.4689	1.39484e-08	0.000205789
chr11_67989759_67991369	chr11	67989759	67991369	1611	UNC93B1	12728	CD14+ Monocyte	1.55744	2.70363	45.5632	1.64399e-08	0.000205789
chr19_6718628_6719206	chr19	6718628	6719206	579	C3	1444	CD14+ Monocyte	1.12576	3.09736	45.8176	1.65105e-08	0.000205789
chr4_10639795_10641173	chr4	10639795	10641173	1379	CLNK	43595	CD14+ Monocyte	-0.841014	3.69189	45.0919	1.98387e-08	0.000205789
chr1_997155_997405	chr1	997155	997405	251	HES4	2692	CD14+ Monocyte	2.04625	1.54156	42.184	2.15069e-08	0.000205789
chr19_35869442_35870302	chr19	35869442	35870302	861	APLP1	869	CD14+ Monocyte	1.2598	3.16674	44.434	2.35016e-08	0.000205789
chr19_40613222_40614358	chr19	40613222	40614358	1137	LTBP4	11854	CD14+ Monocyte	0.729513	5.165	44.3691	2.39129e-08	0.000205789
chr19_11209496_11210623	chr19	11209496	11210623	1128	KANK2	11631	CD14+ Monocyte	1.81432	1.78348	42.1563	2.82619e-08	0.000221106
chr7_131218742_131220177	chr7	131218742	131220177	1436	MKLN1-AS	107602	CD14+ Monocyte	-1.12419	3.70957	43.3175	3.19133e-08	0.000228866
chr19_6828954_6829596	chr19	6828954	6829596	643	VAV1	56247	CD14+ Monocyte	1.39607	2.40617	42.332	3.8536e-08	0.000255102
chr1_999684_1001166	chr1	999684	1001166	1483	HES4	413	CD14+ Monocyte	1.34554	5.07117	40.2407	7.3702e-08	0.000438016
chr1_158285585_158286401	chr1	158285585	158286401	817	CD1C	3521	CD14+ Monocyte	-0.624356	5.41152	39.9316	8.01409e-08	0.000438016
chr19_49363177_49364033	chr19	49363177	49364033	857	DKKL1	157	CD14+ Monocyte	1.06931	5.3554	39.6214	8.74457e-08	0.000438016
chr19_45474731_45476714	chr19	45474731	45476714	1984	FOSB	6736	CD14+ Monocyte	0.865624	6.82797	39.365	9.39214e-08	0.000438016
chr8_47430944_47431934	chr8	47430944	47431934	991	SPIDR	170007	CD14+ Monocyte	-0.920215	3.66007	39.4002	9.3965e-08	0.000438016
chr9_137150507_137152009	chr9	137150507	137152009	1503	LRRC26	18042	CD14+ Monocyte	1.82577	3.53647	39.2241	9.67058e-08	0.000438016
chr19_991418_992065	chr19	991418	992065	648	WDR18	7074	CD14+ Monocyte	1.23474	4.04927	39.0645	1.02803e-07	0.00044235
chr12_121038612_121039611	chr12	121038612	121039611	1000	OASL	369	CD14+ Monocyte	0.755857	5.13349	38.6802	1.14092e-07	0.000448739
chr2_142863824_142864096	chr2	142863824	142864096	273	KYNU	13567	CD14+ Monocyte	-1.36378	1.27656	37.2292	1.14716e-07	0.000448739
chr3_38083975_38086278	chr3	38083975	38086278	2304	DLEC1	44768	CD14+ Monocyte	1.27952	3.91212	37.1901	1.76455e-07	0.000632725
chr9_93669351_93673891	chr9	93669351	93673891	4541	PHF2	92768	CD14+ Monocyte	1.19974	3.93873	36.8448	1.94908e-07	0.000670936
chr20_33724442_33724717	chr20	33724442	33724717	276	PXMP4	4132	CD14+ Monocyte	1.39711	2.12016	36.2181	2.1276e-07	0.00070422
chr19_55062760_55063481	chr19	55062760	55063481	722	RDH13	333	CD14+ Monocyte	0.645886	5.14479	36.2351	2.30838e-07	0.000735759
chr20_60000153_60000848	chr20	60000153	60000848	696	CDH26	3780	CD14+ Monocyte	-1.60379	0.960829	33.9603	2.91578e-07	0.000896164
chr19_55279743_55280637	chr19	55279743	55280637	895	HSPBP1	113	CD14+ Monocyte	0.543308	5.0779	34.875	3.44862e-07	0.000952161
chr19_17403193_17403716	chr19	17403193	17403716	524	BST2	1914	CD14+ Monocyte	1.22106	3.12024	34.8669	3.48281e-07	0.000952161
chr21_45642657_45643899	chr21	45642657	45643899	1243	PCBP3	175	CD14+ Monocyte	0.866173	6.45633	34.8392	3.48366e-07	0.000952161
chr9_136978014_136978980	chr9	136978014	136978980	967	PTGDS	511	CD14+ Monocyte	1.16309	4.06757	34.631	3.72971e-07	0.000970655
chr3_128523267_128524523	chr3	128523267	128524523	1257	GATA2	30066	CD14+ Monocyte	1.27907	3.17036	34.038	4.47572e-07	0.00110049
chr22_44192163_44193004	chr22	44192163	44193004	842	PARVG	11239	CD14+ Monocyte	0.87331	4.34115	33.7521	4.83863e-07	0.00110985
chr19_1455418_1456268	chr19	1455418	1456268	851	APC2	2435	CD14+ Monocyte	1.15253	4.04936	33.74	4.87874e-07	0.00110985
chr20_63553019_63554202	chr20	63553019	63554202	1184	FNDC11	0	CD14+ Monocyte	1.12461	5.18973	33.7046	4.90067e-07	0.00110985
chr19_3284629_3286243	chr19	3284629	3286243	1615	CELF5	59352	CD14+ Monocyte	1.1585	3.5738	33.5346	5.2062e-07	0.00114479
chr19_2034823_2035543	chr19	2034823	2035543	721	MKNK2	15701	CD14+ Monocyte	0.970466	4.69318	33.3455	5.46814e-07	0.00114479
chr13_113663759_113667979	chr13	113663759	113667979	4221	TFDP1	79007	CD14+ Monocyte	1.05529	3.25076	33.2759	5.58709e-07	0.00114479
chr1_185373817_185374480	chr1	185373817	185374480	664	IVNS1ABP	56574	CD14+ Monocyte	-0.790352	4.22825	33.1469	5.81348e-07	0.00116348
chr14_103140349_103140619	chr14	103140349	103140619	271	TNFAIP2	16889	CD14+ Monocyte	1.58393	1.31028	31.2715	6.07986e-07	0.00118914
chr17_60134871_60135966	chr17	60134871	60135966	1096	CA4	14006	CD14+ Monocyte	0.643386	4.17706	32.8697	6.33317e-07	0.00121116
chr10_19832680_19833591	chr10	19832680	19833591	912	PLXDC2	16249	CD14+ Monocyte	-1.32699	2.85424	32.7323	6.69432e-07	0.00125239
chr6_136609873_136610988	chr6	136609873	136610988	1116	MAP7	59054	CD14+ Monocyte	-1.05345	3.71577	32.2281	7.72675e-07	0.00141478
chr6_134177744_134178728	chr6	134177744	134178728	985	SGK1	117	CD14+ Monocyte	-0.724162	4.80633	32.061	8.09678e-07	0.00143272
chr6_31349920_31352573	chr6	31349920	31352573	2654	HLA-B	4606	CD14+ Monocyte	0.724234	5.35636	31.9925	8.26577e-07	0.00143272
chr9_27341025_27341849	chr9	27341025	27341849	825	EQTN	43875	CD14+ Monocyte	-1.36597	2.48396	32.0135	8.32414e-07	0.00143272
chr11_12124333_12125355	chr11	12124333	12125355	1023	MICAL2	13034	CD14+ Monocyte	-0.617291	4.45797	31.8202	8.72797e-07	0.00147277
chr16_89200373_89202424	chr16	89200373	89202424	2052	SLC22A31	164	CD14+ Monocyte	0.939644	4.56816	31.5922	9.37363e-07	0.00154231
chr12_27180642_27181386	chr12	27180642	27181386	745	STK38L	62899	CD14+ Monocyte	-1.20544	2.58133	31.5957	9.49852e-07	0.00154231
chr9_128249986_128250989	chr9	128249986	128250989	1004	SWI5	24366	CD14+ Monocyte	0.575777	5.10721	31.424	9.86115e-07	0.00156109
chr2_96260334_96261117	chr2	96260334	96261117	784	TMEM127	4880	CD14+ Monocyte	-0.549385	4.94745	31.383	9.98995e-07	0.00156109
chr6_134640757_134641590	chr6	134640757	134641590	834	CT69	161860	CD14+ Monocyte	-0.578017	5.09034	31.3286	1.01584e-06	0.00156109
chr4_26873024_26874330	chr4	26873024	26874330	1307	STIM2	12184	CD14+ Monocyte	-1.13617	2.46031	31.021	1.12309e-06	0.00167274
chr11_115912145_115913360	chr11	115912145	115913360	1216	LINC00900	151945	CD14+ Monocyte	-1.30707	2.71168	31.0265	1.12783e-06	0.00167274
chr11_47244998_47245237	chr11	47244998	47245237	240	NR1H3	3062	CD14+ Monocyte	2.06108	1.85674	30.1363	1.14681e-06	0.00167274
chrX_53287367_53288721	chrX	53287367	53288721	1355	IQSEC2	5783	CD14+ Monocyte	-0.834382	3.48901	30.7158	1.23943e-06	0.0017697
chr15_90157986_90158594	chr15	90157986	90158594	609	SEMA4B	26325	CD14+ Monocyte	0.745839	4.04981	30.6664	1.2544e-06	0.0017697
chr21_35932062_35933009	chr21	35932062	35933009	948	LINC01436	72310	CD14+ Monocyte	-0.543178	5.17675	30.5468	1.29792e-06	0.00177932
chr17_58622850_58623587	chr17	58622850	58623587	738	TEX14	68458	CD14+ Monocyte	2.05366	0.733307	28.9815	1.30258e-06	0.00177932
chr19_16153904_16154223	chr19	16153904	16154223	320	HSH2D	10220	CD14+ Monocyte	2.34751	0.983911	28.9643	1.34909e-06	0.00180872
chr19_45473729_45474310	chr19	45473729	45474310	582	FOSB	5734	CD14+ Monocyte	1.03467	4.99195	30.3367	1.38756e-06	0.00180872
chr4_2824891_2826449	chr4	2824891	2826449	1559	SH3BP2	6078	CD14+ Monocyte	1.48234	1.54039	29.3756	1.39669e-06	0.00180872
chr19_45615911_45616512	chr19	45615911	45616512	602	GPR4	13699	CD14+ Monocyte	0.909162	4.10625	30.2505	1.43113e-06	0.00181118
chr7_38394027_38395377	chr7	38394027	38395377	1351	TRG-AS1	52451	CD14+ Monocyte	-0.960181	3.86589	30.192	1.45563e-06	0.00181549
chr1_32711163_32712768	chr1	32711163	32712768	1606	SYNC	8393	CD14+ Monocyte	0.786128	4.45871	30.0271	1.53303e-06	0.00185999
chr19_19540033_19541590	chr19	19540033	19541590	1558	CILP2	1769	CD14+ Monocyte	0.803384	4.32685	30.0269	1.53454e-06	0.00185999
chr17_8885249_8886112	chr17	8885249	8886112	864	PIK3R6	17572	CD14+ Monocyte	1.19849	2.75304	29.9277	1.57994e-06	0.00188842
chr20_64038327_64039566	chr20	64038327	64039566	1240	C20orf204	4601	CD14+ Monocyte	0.625921	4.1296	29.841	1.62855e-06	0.00191985
chr1_78619466_78620961	chr1	78619466	78620961	1496	IFI44L	514	CD14+ Monocyte	1.50337	2.5325	29.4704	1.66647e-06	0.00193802
chr1_990202_990765	chr1	990202	990765	564	PERM1	8109	CD14+ Monocyte	2.81525	0.742259	28.3638	1.73901e-06	0.00198649
chr21_35102463_35103583	chr21	35102463	35103583	1121	RUNX1	53161	CD14+ Monocyte	-0.750083	3.87717	29.5468	1.7884e-06	0.00198649
chr14_105567016_105569014	chr14	105567016	105569014	1999	TMEM121	39912	CD14+ Monocyte	1.88536	1.36199	28.5968	1.7977e-06	0.00198649
chr9_132372298_132373423	chr9	132372298	132373423	1126	SETX	17312	CD14+ Monocyte	-0.585912	4.18243	29.5222	1.80049e-06	0.00198649
chr12_89160534_89161048	chr12	89160534	89161048	515	LINC02458	140842	CD14+ Monocyte	-0.881778	4.31175	29.3547	1.89845e-06	0.00199098
chr6_87789223_87790224	chr6	87789223	87790224	1002	AKIRIN2	86990	CD14+ Monocyte	-0.759627	4.34288	29.3245	1.91699e-06	0.00199098
chr1_31815699_31816213	chr1	31815699	31816213	515	SPOCD1	162	CD14+ Monocyte	0.933927	2.76519	29.2851	1.92103e-06	0.00199098
chr12_30851205_30851962	chr12	30851205	30851962	758	CAPRIN2	96254	CD14+ Monocyte	1.08177	3.44718	29.3201	1.93129e-06	0.00199098
chr10_63703085_63703615	chr10	63703085	63703615	531	JMJD1C	181195	CD14+ Monocyte	-0.659567	4.37449	29.2199	1.98208e-06	0.00199098
chr8_74295489_74296201	chr8	74295489	74296201	713	GDAP1	54181	CD14+ Monocyte	1.55428	2.26867	28.9915	1.99819e-06	0.00199098
chr17_79996892_79997872	chr17	79996892	79997872	981	TBC1D16	38000	CD14+ Monocyte	0.500145	5.96462	29.1716	2.00984e-06	0.00199098
chr21_43352576_43353312	chr21	43352576	43353312	737	LINC01679	9037	CD14+ Monocyte	2.14816	3.64182	29.1192	2.04191e-06	0.00199098
chr12_13099047_13099545	chr12	13099047	13099545	499	GSG1	3372	CD14+ Monocyte	-0.877351	3.7652	29.115	2.05883e-06	0.00199098
chr6_150622616_150623719	chr6	150622616	150623719	1104	PLEKHG1	9244	CD14+ Monocyte	-1.19085	2.61763	29.1461	2.05904e-06	0.00199098
chr21_41423369_41424108	chr21	41423369	41424108	740	MX1	1922	CD14+ Monocyte	0.913719	3.6754	28.7983	2.28147e-06	0.00218154
chr3_46100772_46101486	chr3	46100772	46101486	715	XCR1	14928	CD14+ Monocyte	-0.622784	4.55473	28.3517	2.62249e-06	0.00244161
chr5_1516091_1517559	chr5	1516091	1517559	1469	LPCAT1	6401	CD14+ Monocyte	-0.838324	3.29529	28.3485	2.64648e-06	0.00244161
chr2_12168768_12170375	chr2	12168768	12170375	1608	MIR3681HG	161653	CD14+ Monocyte	-0.824926	4.31981	28.2996	2.66693e-06	0.00244161
chr19_45308137_45308484	chr19	45308137	45308484	348	CKM	14391	CD14+ Monocyte	1.46756	1.73562	27.7207	2.71336e-06	0.00245399
chr11_117989697_117990076	chr11	117989697	117990076	380	IL10RA	3304	CD14+ Monocyte	-1.09917	3.43733	28.229	2.73749e-06	0.00245399
chr4_51905849_51906983	chr4	51905849	51906983	1135	DCUN1D4	62271	CD14+ Monocyte	-0.599398	3.92355	28.1868	2.76933e-06	0.00245693
chr19_18879309_18880528	chr19	18879309	18880528	1220	CERS1	15630	CD14+ Monocyte	1.19999	3.02505	28.0194	2.93165e-06	0.00257258
chr1_993375_994201	chr1	993375	994201	827	HES4	5896	CD14+ Monocyte	2.13211	1.8285	27.0559	2.95946e-06	0.00257258
chr4_3556359_3557944	chr4	3556359	3557944	1586	LRPAP1	23937	CD14+ Monocyte	0.62546	4.42228	27.9343	3.00446e-06	0.00258558
chr4_12126410_12126833	chr4	12126410	12126833	424	HS3ST1	697516	CD14+ Monocyte	-1.22209	2.32894	27.8663	3.05511e-06	0.00260314
chr17_18300799_18301741	chr17	18300799	18301741	943	TOP3A	13253	CD14+ Monocyte	-0.82037	3.93694	27.8439	3.10088e-06	0.00261623
chr22_16869391_16870291	chr22	16869391	16870291	901	XKR3	47692	CD14+ Monocyte	-2.13355	0.710534	26.6402	3.19051e-06	0.00266571
chr19_8592047_8593034	chr19	8592047	8593034	988	ADAMTS10	149	CD14+ Monocyte	0.811562	4.96164	27.6356	3.31188e-06	0.00271442
chr7_102279390_102280055	chr7	102279390	102280055	666	SH2B2	5085	CD14+ Monocyte	0.814225	2.98192	27.6047	3.37646e-06	0.00274124
chr16_72840440_72841206	chr16	72840440	72841206	767	LINC01572	175470	CD14+ Monocyte	-1.17421	1.67205	27.3531	3.42374e-06	0.00275365
chr10_133056771_133059263	chr10	133056771	133059263	2493	LINC01168	91238	CD14+ Monocyte	1.39511	1.91066	27.1644	3.4955e-06	0.00278533
chr20_35238022_35239237	chr20	35238022	35239237	1216	MMP24	11333	CD14+ Monocyte	1.67747	1.51719	26.7136	3.54955e-06	0.0028024
chr3_122060093_122060548	chr3	122060093	122060548	456	CD86	4732	CD14+ Monocyte	-1.55998	2.35825	27.3827	3.6098e-06	0.0028024
chr4_184964527_184968001	chr4	184964527	184968001	3475	LINC01093	65066	CD14+ Monocyte	1.10594	3.28425	27.3924	3.61461e-06	0.0028024
chr12_27179654_27180312	chr12	27179654	27180312	659	STK38L	63973	CD14+ Monocyte	-0.610656	3.88683	27.1308	3.9212e-06	0.00293534
chr1_87869387_87870326	chr1	87869387	87870326	940	LINC01364	497732	CD14+ Monocyte	-0.654753	4.27939	27.1022	3.94972e-06	0.00293534
chr15_41402055_41403111	chr15	41402055	41403111	1057	NDUFAF1	441	CD14+ Monocyte	0.52828	4.38351	27.1004	3.95489e-06	0.00293534
chr17_74513957_74515081	chr17	74513957	74515081	1125	CD300LB	16394	CD14+ Monocyte	0.783359	5.18247	27.0832	3.9739e-06	0.00293534
chr2_26492885_26494250	chr2	26492885	26494250	1366	OTOF	14761	CD14+ Monocyte	1.76573	4.41307	27.0811	3.99043e-06	0.00293534
chr6_134437065_134437841	chr6	134437065	134437841	777	LINC01010	126	CD14+ Monocyte	-0.584379	4.17656	27.0731	3.99074e-06	0.00293534
chr19_1082004_1082875	chr19	1082004	1082875	872	ARHGAP45	5371	CD14+ Monocyte	1.13979	4.69004	26.9937	4.09649e-06	0.00298759
chr19_45792278_45793240	chr19	45792278	45793240	963	DMWD	395	CD14+ Monocyte	0.570849	4.95712	26.9533	4.14663e-06	0.00299075
chr16_89922999_89923584	chr16	89922999	89923584	586	TUBB3	243	CD14+ Monocyte	0.865792	3.60943	26.8885	4.26731e-06	0.00299075
chr12_89783395_89784145	chr12	89783395	89784145	751	ATP2B1	74029	CD14+ Monocyte	-1.14946	2.88909	26.8956	4.26847e-06	0.00299075
chr11_102393184_102393702	chr11	102393184	102393702	519	BIRC2	45811	CD14+ Monocyte	2.14071	0.638781	25.5126	4.30675e-06	0.00299075
chr5_62732415_62733285	chr5	62732415	62733285	871	LRRC70	153597	CD14+ Monocyte	-1.0162	3.12493	26.8413	4.3354e-06	0.00299075
chr11_1731974_1735533	chr11	1731974	1735533	3560	IFITM10	15062	CD14+ Monocyte	1.29835	2.74438	26.6615	4.34409e-06	0.00299075
chr1_218463184_218464080	chr1	218463184	218464080	897	TGFB2-AS1	117506	CD14+ Monocyte	-0.708806	3.79854	26.7304	4.47618e-06	0.00303543
chr5_88826940_88827737	chr5	88826940	88827737	798	MEF2C	248	CD14+ Monocyte	-0.690242	4.24972	26.6876	4.53447e-06	0.00303543
chr16_1651054_1652763	chr16	1651054	1652763	1710	JPT2	25515	CD14+ Monocyte	1.25495	2.74068	26.4203	4.55007e-06	0.00303543
chr18_56468029_56469000	chr18	56468029	56469000	972	TXNL1	169592	CD14+ Monocyte	-1.15445	2.86872	26.6529	4.61205e-06	0.00305311
chr1_991143_991579	chr1	991143	991579	437	HES4	8518	CD14+ Monocyte	2.64249	0.72141	25.2472	4.70911e-06	0.00309356
chr2_191377152_191378023	chr2	191377152	191378023	872	MYO1B	131749	CD14+ Monocyte	-0.978664	2.77327	26.566	4.77295e-06	0.00311174
chr5_60538409_60539965	chr5	60538409	60539965	1557	PDE4D	42123	CD14+ Monocyte	-1.04732	3.67682	26.5169	4.81102e-06	0.00311298
chr3_51955660_51956834	chr3	51955660	51956834	1175	GPR62	280	CD14+ Monocyte	0.662603	3.997	26.4873	4.85568e-06	0.00311843
chr11_1744348_1744960	chr11	1744348	1744960	613	IFITM10	5635	CD14+ Monocyte	1.70139	1.34061	25.4582	5.11614e-06	0.00326137
chr19_48501281_48502663	chr19	48501281	48502663	1383	LMTK3	10526	CD14+ Monocyte	0.891083	4.80241	26.1658	5.39477e-06	0.0034137
chr4_140742272_140743888	chr4	140742272	140743888	1617	TBC1D9	12497	CD14+ Monocyte	-0.962337	3.40684	26.0386	5.66074e-06	0.00352168
chr17_78154932_78155730	chr17	78154932	78155730	799	C17orf99	8548	CD14+ Monocyte	0.946005	3.77677	26.031	5.66773e-06	0.00352168
chr6_81797233_81798112	chr6	81797233	81798112	880	LINC01526	16080	CD14+ Monocyte	-1.19062	1.44472	25.5856	5.71776e-06	0.00352168
chr1_247409917_247410265	chr1	247409917	247410265	349	NLRP3	5907	CD14+ Monocyte	-1.05054	3.06214	25.981	5.7946e-06	0.00352168
chr3_143134783_143136201	chr3	143134783	143136201	1419	CHST2	15013	CD14+ Monocyte	-0.921249	3.80342	25.9329	5.84426e-06	0.00352168
chr19_6958691_6959309	chr19	6958691	6959309	619	ADGRE1	71113	CD14+ Monocyte	-1.1118	2.22093	25.8603	5.84499e-06	0.00352168
chr16_72444438_72445188	chr16	72444438	72445188	751	LINC01572	219782	CD14+ Monocyte	-1.44924	1.24036	25.5182	5.92311e-06	0.00352168
chr8_96282778_96283372	chr8	96282778	96283372	595	PTDSS1	20877	CD14+ Monocyte	-1.14758	3.16969	25.879	5.9765e-06	0.00352168
chr22_17706064_17706926	chr22	17706064	17706926	863	BCL2L13	269	CD14+ Monocyte	-0.808323	3.90118	25.85	6.01165e-06	0.00352168
chr9_137021749_137022564	chr9	137021749	137022564	816	C9orf139	4899	CD14+ Monocyte	0.846886	4.85995	25.8246	6.04734e-06	0.00352168
chr11_40086280_40087276	chr11	40086280	40087276	997	LRRC4C	205854	CD14+ Monocyte	-1.55299	1.67002	25.5601	6.04861e-06	0.00352168
chr14_104077723_104078557	chr14	104077723	104078557	835	ASPG	7142	CD14+ Monocyte	0.817879	3.15927	25.8435	6.05649e-06	0.00352168
chr13_42544065_42544818	chr13	42544065	42544818	754	TNFSF11	17917	CD14+ Monocyte	-1.09697	1.79452	25.661	6.2384e-06	0.00358089
chr17_45430905_45431973	chr17	45430905	45431973	1069	ARHGAP27	897	CD14+ Monocyte	0.757524	4.18228	25.7296	6.26057e-06	0.00358089
chr6_17932035_17932935	chr6	17932035	17932935	901	KIF13A	54700	CD14+ Monocyte	-0.692224	4.12349	25.6931	6.32895e-06	0.00358327
chr19_17830617_17831208	chr19	17830617	17831208	592	INSL3	9098	CD14+ Monocyte	1.49406	1.60342	25.1538	6.43658e-06	0.00361576
chr14_70692000_70692807	chr14	70692000	70692807	808	LINC01269	5890	CD14+ Monocyte	-0.822916	3.17828	25.6095	6.54887e-06	0.00363602
chr19_4556597_4557045	chr19	4556597	4557045	449	SEMA6B	2639	CD14+ Monocyte	1.14388	2.87888	25.5077	6.62005e-06	0.00365198
chr2_241540813_241542384	chr2	241540813	241542384	1572	BOK	16360	CD14+ Monocyte	1.23394	3.11938	25.3999	7.02609e-06	0.00385128
chr8_127365785_127366516	chr8	127365785	127366516	732	POU5F1B	49308	CD14+ Monocyte	-1.38988	1.53778	25.1574	7.08256e-06	0.00385766
chr4_52843662_52844513	chr4	52843662	52844513	852	RASL11B	17803	CD14+ Monocyte	-1.11484	3.60141	25.3448	7.13603e-06	0.00386171
chr14_92765651_92766299	chr14	92765651	92766299	649	LGMN	17024	CD14+ Monocyte	-1.11723	1.62019	25.0629	7.24857e-06	0.00386171
chr4_7539429_7540492	chr4	7539429	7540492	1064	AFAP1-AS1	213597	CD14+ Monocyte	1.51509	2.21194	25.1959	7.26356e-06	0.00386171
chr6_31851279_31853058	chr6	31851279	31853058	1780	NEU1	9763	CD14+ Monocyte	1.35567	2.62268	25.118	7.4516e-06	0.00390918
chr2_113217251_113218901	chr2	113217251	113218901	1651	PAX8-AS1	16625	CD14+ Monocyte	-0.723074	3.28627	25.2051	7.49511e-06	0.00390918
chr17_3754502_3755559	chr17	3754502	3755559	1058	HASPIN	30600	CD14+ Monocyte	1.22437	2.16472	24.9396	7.82608e-06	0.00403833
chr18_13302376_13303389	chr18	13302376	13303389	1014	LDLRAD4	25015	CD14+ Monocyte	-1.20757	1.90041	25.031	7.8366e-06	0.00403833
chr7_151920441_151920984	chr7	151920441	151920984	544	PRKAG2	43326	CD14+ Monocyte	-0.905407	4.02493	25.0099	7.97946e-06	0.00406513
chr15_89836425_89838010	chr15	89836425	89838010	1586	ANPEP	21573	CD14+ Monocyte	-0.758103	3.56221	25.0256	7.98307e-06	0.00406513
chr6_33017931_33018389	chr6	33017931	33018389	459	HLA-DOA	8340	CD14+ Monocyte	-1.23188	1.79499	24.6117	8.11918e-06	0.00411012
chr8_96978989_96979994	chr8	96978989	96979994	1006	TSPYL5	297934	CD14+ Monocyte	-0.801863	3.48729	24.8989	8.30963e-06	0.00415745
chr19_10878948_10879678	chr19	10878948	10879678	731	CARM1	6520	CD14+ Monocyte	0.883036	2.28802	24.7291	8.35343e-06	0.00415745
chr19_11208065_11209195	chr19	11208065	11209195	1131	KANK2	10200	CD14+ Monocyte	1.03891	2.57158	24.7721	8.40165e-06	0.00415745
chr2_10278120_10279085	chr2	10278120	10279085	966	HPCAL1	23818	CD14+ Monocyte	-0.685461	4.45428	24.8356	8.46544e-06	0.00415745
chr12_130763430_130765636	chr12	130763430	130765636	2207	RIMBP2	47125	CD14+ Monocyte	1.76067	2.33962	24.45	8.50181e-06	0.00415745
chr8_124600541_124602019	chr8	124600541	124602019	1479	NDUFB9	61419	CD14+ Monocyte	-0.738247	3.97068	24.8221	8.51268e-06	0.00415745
chr10_78250090_78250818	chr10	78250090	78250818	729	LINC00595	16523	CD14+ Monocyte	-0.633126	3.60149	24.8127	8.55084e-06	0.00415745
chr13_76667308_76668193	chr13	76667308	76668193	886	KCTD12	218212	CD14+ Monocyte	-1.34572	1.70681	24.4247	8.95994e-06	0.00433188
chr19_49623251_49625181	chr19	49623251	49625181	1931	RRAS	14962	CD14+ Monocyte	1.92673	0.813803	23.5227	9.0854e-06	0.004368
chr16_79264321_79265445	chr16	79264321	79265445	1125	MAF	335292	CD14+ Monocyte	-0.773163	2.92704	24.6252	9.16292e-06	0.00438079
chr9_99085812_99086875	chr9	99085812	99086875	1064	TGFBR1	18237	CD14+ Monocyte	-0.86799	3.34406	24.5917	9.24436e-06	0.00439531
chr10_17784778_17785989	chr10	17784778	17785989	1212	MRC1	23358	CD14+ Monocyte	-0.739576	3.59324	24.5488	9.36807e-06	0.00442966
chr3_124829516_124830546	chr3	124829516	124830546	1031	ITGB5	56819	CD14+ Monocyte	-0.949726	3.37634	24.5256	9.45081e-06	0.00443503
chr11_72741459_72742397	chr11	72741459	72742397	939	ARAP1	9992	CD14+ Monocyte	-0.620325	4.45278	24.4856	9.54926e-06	0.00443503
chr1_59367363_59368679	chr1	59367363	59368679	1317	FGGY	57332	CD14+ Monocyte	-1.0103	3.53481	24.4805	9.59327e-06	0.00443503
chr19_49745895_49746703	chr19	49745895	49746703	809	TSKS	16603	CD14+ Monocyte	1.06648	4.4336	24.4695	9.60784e-06	0.00443503
chr9_114340158_114340997	chr9	114340158	114340997	840	ORM2	10290	CD14+ Monocyte	0.694023	3.85188	24.4645	9.63712e-06	0.00443503
chr19_6753132_6754135	chr19	6753132	6754135	1004	SH2D3A	13300	CD14+ Monocyte	0.589781	4.96824	24.3796	9.89018e-06	0.00452728
chr21_44428272_44428939	chr21	44428272	44428939	668	TRPM2-AS	2709	CD14+ Monocyte	1.18643	3.28215	24.3637	1.00071e-05	0.00455656
chr7_141564082_141564803	chr7	141564082	141564803	722	AGK	12673	CD14+ Monocyte	1.20424	2.82143	24.3347	1.00672e-05	0.00455983
chr4_85928591_85930508	chr4	85928591	85930508	1918	ARHGAP24	493	CD14+ Monocyte	-1.06626	2.23726	24.3003	1.02267e-05	0.00456567
chr19_45768127_45770873	chr19	45768127	45770873	2747	DM1-AS	332	CD14+ Monocyte	0.576425	5.05377	24.2675	1.02808e-05	0.00456567
chr22_29480246_29481900	chr22	29480246	29481900	1655	NEFH	29	CD14+ Monocyte	0.88566	3.27804	24.2757	1.03091e-05	0.00456567
chr2_227020412_227020864	chr2	227020412	227020864	453	COL4A4	143341	CD14+ Monocyte	-2.17366	0.584813	23.1145	1.03403e-05	0.00456567
chr19_19186078_19186982	chr19	19186078	19186982	905	BORCS8	5170	CD14+ Monocyte	1.12195	3.10807	24.1935	1.04308e-05	0.00456567
chr8_21857611_21858992	chr8	21857611	21858992	1382	DOK2	54698	CD14+ Monocyte	-0.517914	4.61625	24.2198	1.04515e-05	0.00456567
chr17_17205409_17206763	chr17	17205409	17206763	1355	PLD6	430	CD14+ Monocyte	0.817816	4.268	24.2253	1.04531e-05	0.00456567
chr11_118705134_118705699	chr11	118705134	118705699	566	DDX6	85249	CD14+ Monocyte	-1.04404	2.03397	24.1614	1.05046e-05	0.00456567
chr16_81437674_81438528	chr16	81437674	81438528	855	CMIP	6641	CD14+ Monocyte	-0.857106	3.09107	24.1922	1.06461e-05	0.00460395
chr14_101972198_101972933	chr14	101972198	101972933	736	DYNC1H1	7626	CD14+ Monocyte	-0.857151	3.88508	24.0747	1.10102e-05	0.00473758
chr2_21255722_21256582	chr2	21255722	21256582	861	LDAH	432592	CD14+ Monocyte	-0.673404	4.68131	24.0399	1.11213e-05	0.00476068
chr10_14015884_14016602	chr10	14015884	14016602	719	FRMD4A	7334	CD14+ Monocyte	-1.56493	2.21953	24.0209	1.12178e-05	0.00476068
chr1_23838106_23838926	chr1	23838106	23838926	821	HMGCL	12647	CD14+ Monocyte	0.664222	3.91261	23.9768	1.13932e-05	0.00476068
chr7_17120476_17121070	chr7	17120476	17121070	595	AHR	177581	CD14+ Monocyte	-1.01624	2.05868	23.8899	1.14277e-05	0.00476068
chr8_130220394_130221371	chr8	130220394	130221371	978	ASAP1-IT2	135626	CD14+ Monocyte	1.04604	3.99141	23.9442	1.15347e-05	0.00476068
chr14_97538910_97539695	chr14	97538910	97539695	786	LINC02325	80095	CD14+ Monocyte	1.722	1.50814	23.4959	1.15542e-05	0.00476068
chr4_161419625_161420343	chr4	161419625	161420343	719	FSTL5	743657	CD14+ Monocyte	-1.70614	1.59503	23.7366	1.15618e-05	0.00476068
chr3_45972357_45973199	chr3	45972357	45973199	843	FYCO1	22625	CD14+ Monocyte	-0.536935	4.51662	23.9025	1.16672e-05	0.00478123
chr5_179811106_179811672	chr5	179811106	179811672	567	SQSTM1	4098	CD14+ Monocyte	0.776267	3.67798	23.8749	1.18176e-05	0.00481989
chr14_34666021_34666635	chr14	34666021	34666635	615	SNX6	35873	CD14+ Monocyte	1.50645	0.941156	23.0222	1.19469e-05	0.00484965
chr11_16790973_16792081	chr11	16790973	16792081	1109	C11orf58	52327	CD14+ Monocyte	-0.814411	3.75902	23.8058	1.21049e-05	0.00489074
chr11_107824671_107825574	chr11	107824671	107825574	904	SLC35F2	33213	CD14+ Monocyte	-1.36425	1.50875	23.5424	1.2538e-05	0.00499536
chr16_60107129_60108213	chr16	60107129	60108213	1085	LINC02141	251777	CD14+ Monocyte	-1.68083	1.92299	23.6175	1.26562e-05	0.00499921
chr6_155220945_155221650	chr6	155220945	155221650	706	TIAM2	3980	CD14+ Monocyte	-1.1977	2.80432	23.6616	1.28257e-05	0.00499921
chr11_64342201_64342977	chr11	64342201	64342977	777	CCDC88B	1998	CD14+ Monocyte	0.545005	4.76046	23.6269	1.28382e-05	0.00499921
chr17_81119267_81120098	chr17	81119267	81120098	832	AATK	11850	CD14+ Monocyte	0.942821	5.33676	23.6007	1.29504e-05	0.00502019
chr19_6111271_6111687	chr19	6111271	6111687	417	RFX2	771	CD14+ Monocyte	0.875264	3.39594	23.5178	1.34115e-05	0.00517563
chr1_58779963_58780224	chr1	58779963	58780224	262	JUN	3823	CD14+ Monocyte	1.42239	3.30864	23.4572	1.36914e-05	0.00526007
chr14_94110589_94111203	chr14	94110589	94111203	615	IFI27	146	CD14+ Monocyte	3.37498	1.33684	22.7795	1.38405e-05	0.00527473
chr11_10581245_10582226	chr11	10581245	10582226	982	LYVE1	12580	CD14+ Monocyte	-0.682548	4.65164	23.4053	1.38698e-05	0.00527473
chr5_16935593_16936947	chr5	16935593	16936947	1355	MYO10	659	CD14+ Monocyte	0.557088	4.94924	23.3957	1.39134e-05	0.00527473
chr9_111131108_111131660	chr9	111131108	111131660	553	LPAR1	92110	CD14+ Monocyte	-1.68757	0.814305	22.7364	1.40629e-05	0.00530801
chr17_18318015_18318372	chr17	18318015	18318372	358	SMCR8	2723	CD14+ Monocyte	0.951078	3.37532	23.3323	1.42158e-05	0.00534227
chr5_167785024_167786353	chr5	167785024	167786353	1330	TENM2	30096	CD14+ Monocyte	-0.685532	3.83591	23.296	1.44379e-05	0.00537959
chr1_33433654_33434280	chr1	33433654	33434280	627	PHC2	2559	CD14+ Monocyte	-0.645839	4.53496	23.2731	1.45298e-05	0.00537959
chr5_83011712_83012539	chr5	83011712	83012539	828	TMEM167A	64855	CD14+ Monocyte	-0.924696	2.54719	23.2934	1.45934e-05	0.00537959
chr19_10292071_10293181	chr19	10292071	10293181	1111	ICAM5	2120	CD14+ Monocyte	0.764963	4.79455	23.2519	1.46379e-05	0.00537959
chr8_138253389_138254505	chr8	138253389	138254505	1117	KCNK9	1448618	CD14+ Monocyte	-1.52972	2.8013	23.2602	1.46987e-05	0.00537959
chr5_115288914_115289556	chr5	115288914	115289556	643	CCDC112	6734	CD14+ Monocyte	-1.4015	1.3349	22.8628	1.50372e-05	0.00540057
chr2_42926874_42927997	chr2	42926874	42927997	1124	LINC01819	111546	CD14+ Monocyte	1.82982	0.665609	22.1889	1.50612e-05	0.00540057
chr8_1755268_1756304	chr8	1755268	1756304	1037	CLN8	7484	CD14+ Monocyte	-0.621092	5.22135	23.1201	1.53208e-05	0.00543881
chr4_120052889_120053204	chr4	120052889	120053204	316	MAD2L1	13644	CD14+ Monocyte	-1.15024	1.88846	23.034	1.5332e-05	0.00543881
chr4_621516_623973	chr4	621516	623973	2458	PDE6B	1599	CD14+ Monocyte	1.43318	1.7121	22.829	1.53901e-05	0.00543881
chr16_90031693_90032870	chr16	90031693	90032870	1178	GAS8-AS1	1792	CD14+ Monocyte	0.7797	3.95603	23.1115	1.54311e-05	0.00543881
chr10_124063670_124064234	chr10	124063670	124064234	565	CHST15	28172	CD14+ Monocyte	-1.06255	2.64827	23.1051	1.55559e-05	0.00543881
chr7_82595824_82596196	chr7	82595824	82596196	373	CACNA2D1	151868	CD14+ Monocyte	-1.12207	1.954	23.0332	1.56379e-05	0.00543881
chr1_93014047_93014999	chr1	93014047	93014999	953	DIPK1A	52525	CD14+ Monocyte	-1.42865	1.59538	22.8104	1.5681e-05	0.00543881
chr7_27364303_27365273	chr7	27364303	27365273	971	HOXA11-AS	178896	CD14+ Monocyte	-1.10355	1.71613	22.8985	1.57887e-05	0.00543881
chr2_129811795_129812719	chr2	129811795	129812719	925	LINC02572	64772	CD14+ Monocyte	-0.539961	4.52781	23.028	1.58292e-05	0.00543881
chrX_118698130_118699433	chrX	118698130	118699433	1304	IL13RA1	28172	CD14+ Monocyte	-0.577534	3.75555	23.0363	1.5833e-05	0.00543881
chrX_13015686_13017114	chrX	13015686	13017114	1429	FAM9C	27506	CD14+ Monocyte	-0.6634	3.31883	23.0323	1.5863e-05	0.00543881
chr6_124573079_124573452	chr6	124573079	124573452	374	NKAIN2	290075	CD14+ Monocyte	-2.46126	0.34022	21.7535	1.59486e-05	0.00544645
chr1_1121898_1125672	chr1	1121898	1125672	3775	C1orf159	5809	CD14+ Monocyte	0.587537	4.32106	22.986	1.6086e-05	0.00547166
chr20_9490642_9491796	chr20	9490642	9491796	1155	LAMP5	22561	CD14+ Monocyte	-1.05431	2.32492	22.9524	1.63228e-05	0.00553035
chr16_49281624_49282483	chr16	49281624	49282483	860	ZNF423	381841	CD14+ Monocyte	1.37137	2.13447	22.7012	1.66008e-05	0.0055777
chr20_20303414_20304302	chr20	20303414	20304302	889	INSM1	63801	CD14+ Monocyte	-1.5223	2.57379	22.9015	1.66642e-05	0.0055777
chr14_92677010_92677548	chr14	92677010	92677548	539	LGMN	71079	CD14+ Monocyte	-0.909597	2.87949	22.8783	1.67992e-05	0.0055777
chr15_99424870_99425984	chr15	99424870	99425984	1115	MEF2A	139432	CD14+ Monocyte	-0.781485	3.92178	22.8563	1.68409e-05	0.0055777
chr17_80395436_80398207	chr17	80395436	80398207	2772	ENDOV	16959	CD14+ Monocyte	1.41693	3.10585	22.79	1.68964e-05	0.0055777
chr12_121025908_121027220	chr12	121025908	121027220	1313	C12orf43	9421	CD14+ Monocyte	1.1756	2.48606	22.6334	1.70283e-05	0.0055777
chr9_114097599_114098967	chr9	114097599	114098967	1369	AMBP	19299	CD14+ Monocyte	1.38735	2.04817	22.6837	1.70823e-05	0.0055777
chr16_2178393_2179008	chr16	2178393	2179008	616	CASKIN1	17597	CD14+ Monocyte	0.980343	2.84532	22.8057	1.70888e-05	0.0055777
chr1_36218001_36218761	chr1	36218001	36218761	761	THRAP3	5681	CD14+ Monocyte	1.10452	2.5792	22.7484	1.71107e-05	0.0055777
chr19_12840483_12841448	chr19	12840483	12841448	966	MAST1	1969	CD14+ Monocyte	1.10252	2.8154	22.7604	1.72327e-05	0.0055838
chr22_33920806_33921551	chr22	33920806	33921551	746	LARGE1	330	CD14+ Monocyte	1.03881	2.8986	22.8041	1.72592e-05	0.0055838
chr17_78337276_78338110	chr17	78337276	78338110	835	SOCS3	21557	CD14+ Monocyte	-0.572174	4.92347	22.7238	1.76181e-05	0.00567859
chr19_7507621_7508356	chr19	7507621	7508356	736	ZNF358	7746	CD14+ Monocyte	0.712029	4.39898	22.7017	1.77718e-05	0.00569856
chr12_124345582_124346353	chr12	124345582	124346353	772	RFLNA	50490	CD14+ Monocyte	1.2928	2.22892	22.6172	1.78543e-05	0.00569856
chr1_43781074_43782131	chr1	43781074	43782131	1058	ST3GAL3	73539	CD14+ Monocyte	-0.823541	3.53444	22.6921	1.78788e-05	0.00569856
chr17_62882331_62883337	chr17	62882331	62883337	1007	TANC2	82897	CD14+ Monocyte	-0.595364	4.28825	22.6144	1.83246e-05	0.00578945
chr9_108296957_108297709	chr9	108296957	108297709	753	ACTL7B	558277	CD14+ Monocyte	-0.834513	3.41655	22.6151	1.83878e-05	0.00578945
chr15_99408895_99409787	chr15	99408895	99409787	893	MEF2A	155629	CD14+ Monocyte	-0.925218	2.51965	22.6253	1.84292e-05	0.00578945
chrX_55008534_55009516	chrX	55008534	55009516	983	APEX2	8172	CD14+ Monocyte	-1.22105	1.63951	22.3922	1.85607e-05	0.00578945
chr19_48962214_48962746	chr19	48962214	48962746	533	FTL	2562	CD14+ Monocyte	0.551233	4.52281	22.5768	1.85676e-05	0.00578945
chr1_1039654_1041196	chr1	1039654	1041196	1543	AGRN	5662	CD14+ Monocyte	0.833504	4.00089	22.5743	1.86368e-05	0.00579005
chr10_17128175_17128817	chr10	17128175	17128817	643	CUBN	994	CD14+ Monocyte	-1.19282	2.73591	22.5836	1.87094e-05	0.00579172
chr20_3434023_3434787	chr20	3434023	3434787	765	C20orf194	26361	CD14+ Monocyte	-0.860135	2.85861	22.5558	1.88216e-05	0.00579941
chr3_157153291_157154036	chr3	157153291	157154036	746	CCNL1	6111	CD14+ Monocyte	1.04066	2.05953	22.3719	1.88813e-05	0.00579941
chr2_101179708_101180616	chr2	101179708	101180616	909	TBC1D8-AS1	28049	CD14+ Monocyte	-0.947513	3.78313	22.5164	1.90039e-05	0.00579941
chr7_20507915_20508749	chr7	20507915	20508749	835	ABCB5	106917	CD14+ Monocyte	-0.742421	3.49029	22.4883	1.92145e-05	0.005827
chr1_156076066_156077269	chr1	156076066	156077269	1204	MEX3A	5196	CD14+ Monocyte	1.10449	1.78694	22.3589	1.92297e-05	0.005827
chr19_55397913_55399145	chr19	55397913	55399145	1233	UBE2S	8643	CD14+ Monocyte	0.665882	4.1808	22.3906	1.98754e-05	0.00596442
chr19_7505951_7506926	chr19	7505951	7506926	976	TEX45	8404	CD14+ Monocyte	0.812747	4.38293	22.3819	1.9913e-05	0.00596442
chr17_55690065_55690676	chr17	55690065	55690676	612	PCTP	60374	CD14+ Monocyte	-0.747993	3.03659	22.3826	2.00297e-05	0.00596442
chr1_78649527_78649950	chr1	78649527	78649950	424	IFI44	120	CD14+ Monocyte	1.10661	2.77644	22.3325	2.01815e-05	0.00598516
chr2_74874687_74875791	chr2	74874687	74875791	1105	LINC01291	33339	CD14+ Monocyte	0.661384	4.19906	22.3356	2.02385e-05	0.00598516
chr7_26153699_26154381	chr7	26153699	26154381	683	NFE2L3	1502	CD14+ Monocyte	-0.964189	3.14932	22.3357	2.03359e-05	0.00599337
chr15_84720674_84720870	chr15	84720674	84720870	197	SEC11A	4214	CD14+ Monocyte	0.626483	3.39479	22.2795	2.07054e-05	0.00608146
chr10_6381823_6382753	chr10	6381823	6382753	931	LINC02656	31508	CD14+ Monocyte	-0.925625	2.14104	22.1712	2.11358e-05	0.00618675
chr19_718382_719975	chr19	718382	719975	1594	PALM	9448	CD14+ Monocyte	1.06316	1.87437	22.0942	2.12292e-05	0.00619303
chr3_97952038_97953147	chr3	97952038	97953147	1110	RIOX2	19284	CD14+ Monocyte	-0.770704	3.76955	22.1805	2.14037e-05	0.00620456
chr12_45435839_45436532	chr12	45435839	45436532	694	ANO6	143150	CD14+ Monocyte	-1.1454	2.99915	22.1813	2.1452e-05	0.00620456
chr6_16237984_16240029	chr6	16237984	16240029	2046	GMPR	602	CD14+ Monocyte	0.578575	5.31218	22.1546	2.15586e-05	0.00620456
chr15_74620833_74621651	chr15	74620833	74621651	819	CLK3	4998	CD14+ Monocyte	0.632717	3.85187	22.162	2.15622e-05	0.00620456
chr1_207281830_207282483	chr1	207281830	207282483	654	CD55	39194	CD14+ Monocyte	-1.35856	1.0272	21.5515	2.16292e-05	0.00620456
chr1_247408162_247408465	chr1	247408162	247408465	304	NLRP3	7707	CD14+ Monocyte	-0.781096	3.38909	22.1337	2.18329e-05	0.00624217
chr11_115930885_115931989	chr11	115930885	115931989	1105	LINC00900	170685	CD14+ Monocyte	-0.888438	3.8269	22.1061	2.19733e-05	0.00624786
chr1_200642407_200642944	chr1	200642407	200642944	538	KIF14	21656	CD14+ Monocyte	-0.769435	3.04358	22.0491	2.25138e-05	0.00635243
chr1_244214095_244214894	chr1	244214095	244214894	800	C1orf100	137740	CD14+ Monocyte	-0.930961	2.52122	22.036	2.27387e-05	0.0063741
chr1_245679494_245680481	chr1	245679494	245680481	988	SMYD3	308070	CD14+ Monocyte	-1.1854	2.0437	21.9733	2.29599e-05	0.0063987
chr1_234851365_234852174	chr1	234851365	234852174	810	LINC01132	127324	CD14+ Monocyte	-0.624877	4.36064	21.9743	2.30172e-05	0.0063987
chr2_136381886_136382810	chr2	136381886	136382810	925	CXCR4	263737	CD14+ Monocyte	-0.896049	3.37275	21.9624	2.31939e-05	0.00641809
chr1_203638379_203639551	chr1	203638379	203639551	1173	ATP2B4	10443	CD14+ Monocyte	-0.778262	3.18405	21.9374	2.34288e-05	0.00645792
chr20_40326734_40327193	chr20	40326734	40327193	460	MAFB	362043	CD14+ Monocyte	-1.10899	3.98776	21.92	2.3488e-05	0.00645792
chr12_89880496_89881289	chr12	89880496	89881289	794	LINC02399	66403	CD14+ Monocyte	-1.1136	1.86786	21.8324	2.39857e-05	0.00654874
chr14_88049146_88049604	chr14	88049146	88049604	459	LINC01147	22834	CD14+ Monocyte	-0.98623	2.43428	21.8733	2.39922e-05	0.00654874
chr2_136098250_136099698	chr2	136098250	136099698	1449	CXCR4	16537	CD14+ Monocyte	-0.84209	2.45873	21.8349	2.40466e-05	0.00654874
chr17_76406043_76406902	chr17	76406043	76406902	860	SPHK1	20766	CD14+ Monocyte	-0.826576	3.62875	21.8438	2.41565e-05	0.00655792
chr12_109893400_109894006	chr12	109893400	109894006	607	TCHP	6267	CD14+ Monocyte	-1.19481	2.05795	21.7904	2.43725e-05	0.00659576
chr19_45779114_45780023	chr19	45779114	45780023	910	DMPK	404	CD14+ Monocyte	0.994799	3.2586	21.8107	2.44815e-05	0.00660447
chr19_55080114_55082036	chr19	55080114	55082036	1923	EPS8L1	277	CD14+ Monocyte	0.663839	5.59165	21.7877	2.45758e-05	0.00660921
chr20_52682085_52682802	chr20	52682085	52682802	718	LINC01524	61248	CD14+ Monocyte	-0.689538	2.81482	21.7692	2.48673e-05	0.00666621
chr5_132387552_132388351	chr5	132387552	132388351	800	MIR3936HG	17636	CD14+ Monocyte	-0.725368	3.70794	21.7506	2.50033e-05	0.00666621
chr19_10408689_10409484	chr19	10408689	10409484	796	CDC37	5147	CD14+ Monocyte	-0.569176	4.32241	21.7404	2.50202e-05	0.00666621
chr19_18271208_18272873	chr19	18271208	18272873	1666	IQCN	1579	CD14+ Monocyte	0.969199	4.92223	21.7247	2.51557e-05	0.00667586
chr13_76764133_76765324	chr13	76764133	76765324	1192	KCTD12	121081	CD14+ Monocyte	-0.827216	3.01483	21.7397	2.52115e-05	0.00667586
chr8_47591640_47592594	chr8	47591640	47592594	955	SPIDR	61493	CD14+ Monocyte	-0.779553	3.62624	21.7091	2.53735e-05	0.00668273
chr19_49133282_49134139	chr19	49133282	49134139	858	PPFIA3	13739	CD14+ Monocyte	1.30643	2.50177	21.5518	2.5821e-05	0.00674775
chr4_168802874_168803651	chr4	168802874	168803651	778	PALLD	28443	CD14+ Monocyte	-0.808891	2.89302	21.6647	2.58751e-05	0.00674775
chr4_143502106_143502781	chr4	143502106	143502781	676	SMARCA5	10920	CD14+ Monocyte	-1.33976	1.04986	21.1377	2.59602e-05	0.00674948
chr11_8333921_8334482	chr11	8333921	8334482	562	RIC3	164896	CD14+ Monocyte	-1.17347	2.88952	21.6156	2.63513e-05	0.00681004
chr8_29637440_29637901	chr8	29637440	29637901	462	LINC02099	110407	CD14+ Monocyte	-1.10113	2.33852	21.5864	2.65746e-05	0.00681962
chr3_46058904_46059941	chr3	46058904	46059941	1038	XCR1	25903	CD14+ Monocyte	-0.774512	3.20125	21.5885	2.65821e-05	0.00681962
chr14_75282638_75284637	chr14	75282638	75284637	2000	FOS	3811	CD14+ Monocyte	0.529146	7.26006	21.5584	2.66798e-05	0.00681962
chr8_37599455_37600418	chr8	37599455	37600418	964	LINC01605	78069	CD14+ Monocyte	-1.04492	2.24553	21.5494	2.67054e-05	0.00681962
chr12_24966585_24967721	chr12	24966585	24967721	1137	BCAT1	17484	CD14+ Monocyte	-1.09717	2.03674	21.4801	2.71171e-05	0.00687233
chr12_95132892_95133542	chr12	95132892	95133542	651	NR2C1	59274	CD14+ Monocyte	-0.85412	2.51384	21.5182	2.71514e-05	0.00687233
chrX_9986673_9987358	chrX	9986673	9987358	686	WWC3	27895	CD14+ Monocyte	-0.667906	2.97627	21.5093	2.73576e-05	0.00690134
chr5_158383441_158383837	chr5	158383441	158383837	397	LINC02227	25936	CD14+ Monocyte	-1.01514	1.75953	21.2882	2.75049e-05	0.00690134
chr14_34465222_34465627	chr14	34465222	34465627	406	SPTSSA	2982	CD14+ Monocyte	-0.881244	3.04243	21.493	2.75066e-05	0.00690134
chr19_3478870_3480141	chr19	3478870	3480141	1272	SMIM24	384	CD14+ Monocyte	0.700117	3.56171	21.4634	2.77489e-05	0.00692178
chr8_42803106_42804136	chr8	42803106	42804136	1031	CHRNA6	34320	CD14+ Monocyte	-0.603947	3.62766	21.4006	2.83322e-05	0.00700603
chr6_134422735_134423335	chr6	134422735	134423335	601	LINC01010	14380	CD14+ Monocyte	-1.33509	1.80122	21.2547	2.83849e-05	0.00700603
chr1_239815888_239817574	chr1	239815888	239817574	1687	CHRM3-AS2	96769	CD14+ Monocyte	-0.750323	3.64027	21.3908	2.84123e-05	0.00700603
chr10_32961586_32962350	chr10	32961586	32962350	765	ITGB1	3356	CD14+ Monocyte	-0.76269	3.17883	21.3819	2.8574e-05	0.00702568
chr19_3573713_3574291	chr19	3573713	3574291	579	HMG20B	770	CD14+ Monocyte	0.562138	5.33708	21.3531	2.87356e-05	0.00702568
chr11_35110865_35111677	chr11	35110865	35111677	813	CD44	27493	CD14+ Monocyte	-0.800664	2.58257	21.366	2.87767e-05	0.00702568
chr8_26467109_26467995	chr8	26467109	26467995	887	PNMA2	45877	CD14+ Monocyte	-0.963456	3.52669	21.3582	2.88185e-05	0.00702568
chr1_100535149_100536570	chr1	100535149	100536570	1422	GPR88	1568	CD14+ Monocyte	-0.581988	4.39621	21.3217	2.9084e-05	0.00707037
chr19_1062808_1063460	chr19	1062808	1063460	653	ARHGAP45	2498	CD14+ Monocyte	0.927043	3.74728	21.3026	2.9371e-05	0.00710003
chr3_186152417_186153589	chr3	186152417	186153589	1173	ETV5	43328	CD14+ Monocyte	-0.675928	3.84548	21.2587	2.97912e-05	0.00718144
chr12_49821119_49821524	chr12	49821119	49821524	406	NCKAP5L	6889	CD14+ Monocyte	-0.990334	2.40352	21.204	2.98867e-05	0.00718433
chr12_101864_102659	chr12	101864	102659	796	IQSEC3	24489	CD14+ Monocyte	1.49617	0.975995	20.6993	3.00241e-05	0.00719726
chr18_31206127_31207314	chr18	31206127	31207314	1188	DSC1	43271	CD14+ Monocyte	-0.560332	4.32179	21.2245	3.01202e-05	0.00720025
chr18_62510294_62511354	chr18	62510294	62511354	1061	ZCCHC2	11670	CD14+ Monocyte	1.54785	2.18296	20.9425	3.0275e-05	0.00721719
chr7_50598300_50599088	chr7	50598300	50599088	789	GRB10	106213	CD14+ Monocyte	1.52405	1.66026	20.8772	3.04262e-05	0.00723319
chr1_32349153_32349589	chr1	32349153	32349589	437	FAM229A	12654	CD14+ Monocyte	-0.715143	3.0838	21.1419	3.10226e-05	0.00735467
chr6_29947287_29949350	chr6	29947287	29949350	2064	HLA-A	4756	CD14+ Monocyte	1.01567	4.09516	21.1155	3.14158e-05	0.00741067
chr6_149065840_149066713	chr6	149065840	149066713	874	TAB2	151210	CD14+ Monocyte	-0.759232	4.18333	21.1072	3.14311e-05	0.00741067
chr12_52197672_52199052	chr12	52197672	52199052	1381	KRT80	5658	CD14+ Monocyte	-0.644863	5.43146	21.0759	3.17667e-05	0.00742542
chr1_193537370_193538210	chr1	193537370	193538210	841	LINC01031	232626	CD14+ Monocyte	-0.828896	2.75503	21.0841	3.18865e-05	0.00742542
chr20_41008081_41008910	chr20	41008081	41008910	830	TOP1	19911	CD14+ Monocyte	-0.661756	3.8619	21.0623	3.20006e-05	0.00742542
chr20_3686439_3688661	chr20	3686439	3688661	2223	SIGLEC1	18573	CD14+ Monocyte	1.65581	1.69232	20.584	3.21266e-05	0.00742542
chr1_55217584_55217907	chr1	55217584	55217907	324	MIR4422HG	47	CD14+ Monocyte	-0.752888	2.94995	21.0498	3.22644e-05	0.00742542
chr8_93932381_93932984	chr8	93932381	93932984	604	PDP1	15435	CD14+ Monocyte	-1.32022	1.77085	20.9401	3.22977e-05	0.00742542
chr6_11218524_11219721	chr6	11218524	11219721	1198	NEDD9	12947	CD14+ Monocyte	-1.00406	3.52181	21.0383	3.2302e-05	0.00742542
chr14_55814273_55815530	chr14	55814273	55815530	1258	LINC00520	17599	CD14+ Monocyte	-0.754995	2.76204	21.048	3.23562e-05	0.00742542
chr4_2745871_2746832	chr4	2745871	2746832	962	TNIP2	9504	CD14+ Monocyte	1.2535	3.72222	21.0349	3.23771e-05	0.00742542
chr13_50587075_50588204	chr13	50587075	50588204	1130	DLEU7	255488	CD14+ Monocyte	-1.17067	1.64914	20.9631	3.2529e-05	0.00742542
chr14_24034363_24034847	chr14	24034363	24034847	485	DHRS4	1636	CD14+ Monocyte	1.42753	1.36005	20.5327	3.26674e-05	0.00743728
chr20_36097977_36098982	chr20	36097977	36098982	1006	EPB41L1	5268	CD14+ Monocyte	-0.711484	3.21331	20.9818	3.31109e-05	0.00751835
chr3_136950557_136951130	chr3	136950557	136951130	574	IL20RB	6852	CD14+ Monocyte	-1.42002	0.92099	20.4484	3.32963e-05	0.00752834
chr1_185520270_185521057	chr1	185520270	185521057	788	LINC01350	107431	CD14+ Monocyte	-0.790906	3.37308	20.9561	3.33298e-05	0.00752834
chr3_32780807_32781780	chr3	32780807	32781780	974	TRIM71	36216	CD14+ Monocyte	0.583867	3.97078	20.9373	3.34685e-05	0.00753988
chr4_85724992_85726634	chr4	85724992	85726634	1643	ARHGAP24	52163	CD14+ Monocyte	-0.577964	3.36404	20.9304	3.36504e-05	0.00756106
chr22_18577834_18578122	chr22	18577834	18578122	289	RIMBP3	33797	CD14+ Monocyte	-6.05738	0.45631	20.8946	3.38758e-05	0.00759187
chr8_141539875_141541994	chr8	141539875	141541994	2120	PTP4A3	118488	CD14+ Monocyte	1.35328	3.11787	20.8809	3.40057e-05	0.0076012
chr19_49210045_49210843	chr19	49210045	49210843	799	TRPM4	52254	CD14+ Monocyte	0.839993	3.96922	20.879	3.42144e-05	0.00762803
chr19_7643685_7644353	chr19	7643685	7644353	669	STXBP2	6576	CD14+ Monocyte	1.3495	1.40369	20.3709	3.44501e-05	0.00766074
chr3_7706704_7707531	chr3	7706704	7707531	828	GRM7-AS1	171420	CD14+ Monocyte	-1.39722	0.959348	20.3907	3.45492e-05	0.00766199
chr14_35196551_35197284	chr14	35196551	35197284	734	PRORP	74000	CD14+ Monocyte	1.71988	0.957598	20.1414	3.46338e-05	0.00766199
chr17_78324005_78325586	chr17	78324005	78325586	1582	SOCS3	34081	CD14+ Monocyte	-0.770087	4.35484	20.8266	3.48086e-05	0.00768092
chr1_207866647_207867110	chr1	207866647	207867110	464	MIR29B2CHG	43944	CD14+ Monocyte	-0.910121	3.00502	20.8266	3.49725e-05	0.00769735
chr11_96155727_96157563	chr11	96155727	96157563	1837	MAML2	185632	CD14+ Monocyte	-0.752082	4.92449	20.7673	3.55464e-05	0.0077839
chr17_68491130_68492300	chr17	68491130	68492300	1171	PRKAR1A	19479	CD14+ Monocyte	-0.697557	3.80298	20.7732	3.55466e-05	0.0077839
chr17_37832573_37833648	chr17	37832573	37833648	1076	TBC1D3D,TBC1D3I	155400	CD14+ Monocyte	-0.824597	2.76242	20.7201	3.63487e-05	0.00788761
chr18_10250536_10251162	chr18	10250536	10251162	627	LINC01254	163208	CD14+ Monocyte	-1.34021	1.04271	20.1017	3.63825e-05	0.00788761
chr19_17842100_17842403	chr19	17842100	17842403	304	JAK3	5579	CD14+ Monocyte	1.97439	0.769281	19.7943	3.6438e-05	0.00788761
chr7_32727777_32729386	chr7	32727777	32729386	1610	LINC00997	28899	CD14+ Monocyte	0.738719	3.32768	20.7118	3.64785e-05	0.00788761
chr10_62527266_62529085	chr10	62527266	62529085	1820	ZNF365	152898	CD14+ Monocyte	-0.702464	2.63327	20.6904	3.68903e-05	0.00793467
chr6_5979693_5980453	chr6	5979693	5980453	761	NRN1	23591	CD14+ Monocyte	0.89446	3.97157	20.6663	3.69576e-05	0.00793467
chr4_153757385_153757892	chr4	153757385	153757892	508	RNF175	2132	CD14+ Monocyte	-1.52114	0.950596	20.0446	3.69728e-05	0.00793467
chr14_89912448_89913359	chr14	89912448	89913359	912	EFCAB11	41177	CD14+ Monocyte	-0.946114	3.91986	20.6533	3.71162e-05	0.00794565
chr1_155511401_155511858	chr1	155511401	155511858	458	ASH1L-AS1	50183	CD14+ Monocyte	1.54492	1.6704	20.1576	3.73634e-05	0.00797872
chr3_23071466_23072456	chr3	23071466	23072456	991	UBE2E2-AS1	130122	CD14+ Monocyte	-0.978125	3.33483	20.5766	3.82402e-05	0.00814572
chr12_10392396_10392933	chr12	10392396	10392933	538	KLRK1	2355	CD14+ Monocyte	-0.73385	3.38199	20.5631	3.84296e-05	0.00816586
chr11_67587528_67588353	chr11	67587528	67588353	826	GSTP1	3717	CD14+ Monocyte	-0.770952	3.70062	20.522	3.89866e-05	0.00824351
chr7_106952608_106953476	chr7	106952608	106953476	869	PIK3CG	87130	CD14+ Monocyte	-1.0933	3.09672	20.5235	3.91151e-05	0.00825041
chr9_79623834_79624839	chr9	79623834	79624839	1006	TLE4	50658	CD14+ Monocyte	-0.501489	4.64901	20.482	3.94549e-05	0.00830173
chr17_3039205_3040388	chr17	3039205	3040388	1184	OR1A1	175232	CD14+ Monocyte	0.849948	3.39723	20.4634	3.99255e-05	0.00838027
chr8_1699684_1699966	chr8	1699684	1699966	283	CLN8	63822	CD14+ Monocyte	-1.50261	1.1577	20.0064	4.0171e-05	0.00841127
chr6_2658690_2659310	chr6	2658690	2659310	621	MYLK4	91612	CD14+ Monocyte	-1.00869	1.88833	20.4054	4.02885e-05	0.00841541
chr3_16359207_16359747	chr3	16359207	16359747	541	OXNAD1	93996	CD14+ Monocyte	-1.73797	0.825017	19.7058	4.05707e-05	0.00842487
chr10_127979106_127979553	chr10	127979106	127979553	448	PTPRE	7726	CD14+ Monocyte	-1.15753	1.97999	20.3316	4.06863e-05	0.00842487
chr19_7701739_7702027	chr19	7701739	7702027	289	FCER2	104	CD14+ Monocyte	-0.908579	2.43313	20.4108	4.07254e-05	0.00842487
chr8_144331802_144332332	chr8	144331802	144332332	531	SCRT1	4150	CD14+ Monocyte	0.788147	4.43103	20.3623	4.12507e-05	0.00849608
chr19_46633882_46634554	chr19	46633882	46634554	673	GNG8	128	CD14+ Monocyte	0.583465	5.32666	20.3584	4.12671e-05	0.00849608
chr19_16330303_16331319	chr19	16330303	16331319	1017	KLF2	5478	CD14+ Monocyte	0.52444	4.96101	20.3521	4.13717e-05	0.00849729
chr19_40603709_40604378	chr19	40603709	40604378	670	LTBP4	2341	CD14+ Monocyte	0.549252	4.53946	20.3044	4.21154e-05	0.00858045
chr14_100850930_100851700	chr14	100850930	100851700	771	MEG3	24799	CD14+ Monocyte	0.996059	1.94257	20.229	4.22751e-05	0.00858045
chr11_128052787_128053776	chr11	128052787	128053776	990	ETS1	468534	CD14+ Monocyte	-1.4299	1.50432	20.0597	4.27128e-05	0.0086489
chr2_72149659_72150942	chr2	72149659	72150942	1284	CYP26B1	1797	CD14+ Monocyte	1.38233	1.44423	19.8881	4.34504e-05	0.00875979
chr10_126904975_126905855	chr10	126904975	126905855	881	DOCK1	428	CD14+ Monocyte	2.06474	0.601509	19.57	4.34641e-05	0.00875979
chr8_19697510_19698390	chr8	19697510	19698390	881	CSGALNACT1	14749	CD14+ Monocyte	-0.554007	4.30936	20.2056	4.36861e-05	0.00878397
chr3_135784461_135785034	chr3	135784461	135785034	574	PPP2R3A	180693	CD14+ Monocyte	-1.40337	1.14769	19.9383	4.42092e-05	0.00886842
chr9_76358630_76359844	chr9	76358630	76359844	1215	RFK	34582	CD14+ Monocyte	-0.919862	2.93078	20.1686	4.45388e-05	0.00889988
chr11_119617969_119618783	chr11	119617969	119618783	815	NECTIN1	110417	CD14+ Monocyte	-0.755596	3.32108	20.147	4.47749e-05	0.00891954
chr15_90869346_90870387	chr15	90869346	90870387	1042	FURIN	664	CD14+ Monocyte	-0.745245	3.97031	20.1091	4.53343e-05	0.00899945
chr9_27352288_27353638	chr9	27352288	27353638	1351	EQTN	55138	CD14+ Monocyte	-0.860262	3.2757	20.112	4.53852e-05	0.00899945
chr11_118882545_118882885	chr11	118882545	118882885	341	CXCR5	1006	CD14+ Monocyte	1.4376	1.47004	19.7811	4.5666e-05	0.0090343
chr2_234992951_234993925	chr2	234992951	234993925	975	SH3BP4	11578	CD14+ Monocyte	-0.857052	2.84703	20.0766	4.6093e-05	0.00909787
chr22_37824535_37825689	chr22	37824535	37825689	1155	GALR3	1154	CD14+ Monocyte	1.09517	2.41014	19.9612	4.63781e-05	0.0091332
chr6_112005067_112005366	chr6	112005067	112005366	300	CCN6	48737	CD14+ Monocyte	-1.24401	1.28755	19.6395	4.70241e-05	0.00923927
chr2_241865805_241867375	chr2	241865805	241867375	1571	RTP5	2353	CD14+ Monocyte	1.35201	2.62267	19.91	4.73326e-05	0.0092787
chr21_26965381_26966523	chr21	26965381	26966523	1143	ADAMTS5	565	CD14+ Monocyte	-1.25982	2.20735	19.9841	4.75628e-05	0.00930264
chr2_174524080_174525276	chr2	174524080	174525276	1197	GPR155	36992	CD14+ Monocyte	-0.550835	3.86112	19.9344	4.83305e-05	0.00942648
chr18_61992428_61993587	chr18	61992428	61993587	1160	RNF152	99421	CD14+ Monocyte	-0.74948	3.01243	19.9347	4.85939e-05	0.00942648
chr19_39337876_39338266	chr19	39337876	39338266	391	GMFG	1833	CD14+ Monocyte	0.620243	3.74902	19.9218	4.86341e-05	0.00942648
chr5_40016965_40017743	chr5	40016965	40017743	779	DAB2	591732	CD14+ Monocyte	-0.991313	2.58875	19.9032	4.92005e-05	0.00948497
chr16_2339894_2341317	chr16	2339894	2341317	1424	ABCA3	589	CD14+ Monocyte	0.516861	5.51146	19.8769	4.92785e-05	0.00948497
chr19_49700454_49701692	chr19	49700454	49701692	1239	CPT1C	8959	CD14+ Monocyte	1.41124	0.810639	19.185	4.93768e-05	0.00948497
chr2_47090698_47091680	chr2	47090698	47091680	983	STPG4	63628	CD14+ Monocyte	-1.22752	1.25201	19.5612	4.9605e-05	0.00949266
chr1_31238750_31240224	chr1	31238750	31240224	1475	NKAIN1	337	CD14+ Monocyte	1.29838	1.47687	19.5664	4.9745e-05	0.00949266
chr15_58506218_58507248	chr15	58506218	58507248	1031	LIPC-AS1	7483	CD14+ Monocyte	0.98257	3.1795	19.8593	4.97477e-05	0.00949266
chr6_90375477_90376392	chr6	90375477	90376392	916	BACH2	78569	CD14+ Monocyte	-1.05341	2.6621	19.8293	5.0448e-05	0.00959497
chr3_28989235_28990277	chr3	28989235	28990277	1043	RBMS3-AS3	290662	CD14+ Monocyte	-1.22028	1.94145	19.8121	5.05069e-05	0.00959497
chr9_114339030_114339440	chr9	114339030	114339440	411	ORM2	9162	CD14+ Monocyte	0.807712	2.07959	19.7462	5.10068e-05	0.0096686
chr3_153679560_153680834	chr3	153679560	153680834	1275	LINC02006	81692	CD14+ Monocyte	-0.869361	2.09753	19.7578	5.1375e-05	0.00971698
chr8_115585111_115585864	chr8	115585111	115585864	754	TRPS1	82149	CD14+ Monocyte	-0.875221	2.00993	19.6907	5.19847e-05	0.00980401
chr6_148566049_148567004	chr6	148566049	148567004	956	SASH1	56899	CD14+ Monocyte	-0.954559	3.15055	19.7407	5.2063e-05	0.00980401
chr8_42221301_42221819	chr8	42221301	42221819	519	PLAT	13736	CD14+ Monocyte	-0.921225	1.79416	19.6666	5.22102e-05	0.00981027
chr11_102390609_102392618	chr11	102390609	102392618	2010	BIRC2	43236	CD14+ Monocyte	0.657641	3.25132	19.7128	5.26184e-05	0.00986543
chr5_88732030_88732894	chr5	88732030	88732894	865	LINC00461	40989	CD14+ Monocyte	-0.665073	3.17689	19.6753	5.33662e-05	0.00998388
chr6_167094707_167095652	chr6	167094707	167095652	946	CCR6	16154	CD14+ Monocyte	-0.747473	3.74728	19.6376	5.39745e-05	0.0100123
chr22_20979289_20979869	chr22	20979289	20979869	581	LZTR1	2427	CD14+ Monocyte	0.650849	4.05288	19.6318	5.40571e-05	0.0100123
chr16_69536740_69537347	chr16	69536740	69537347	608	NFAT5	28618	CD14+ Monocyte	-0.950588	2.22388	19.5919	5.41039e-05	0.0100123
chr9_16335610_16336589	chr9	16335610	16336589	980	BNC2-AS1	390224	CD14+ Monocyte	-0.913153	3.32381	19.6363	5.41286e-05	0.0100123
chr7_74449768_74450505	chr7	74449768	74450505	738	GTF2IRD1	3400	CD14+ Monocyte	0.826608	2.54439	19.6194	5.41829e-05	0.0100123
chr22_18109895_18111243	chr22	18109895	18111243	1349	TUBA8	435	CD14+ Monocyte	1.73984	0.869035	19.0817	5.44174e-05	0.0100123
chr14_77657184_77657737	chr14	77657184	77657737	554	SPTLC2	40547	CD14+ Monocyte	-0.813049	2.89634	19.629	5.4449e-05	0.0100123
chr19_6475727_6476679	chr19	6475727	6476679	953	DENND1C	5108	CD14+ Monocyte	1.07038	2.56119	19.5819	5.46805e-05	0.0100144
chr21_46143605_46144386	chr21	46143605	46144386	782	FTCD-AS1	6988	CD14+ Monocyte	0.862132	3.31627	19.6049	5.47761e-05	0.0100144
chr10_127945141_127946323	chr10	127945141	127946323	1183	PTPRE	38039	CD14+ Monocyte	-0.993311	2.8161	19.5994	5.50232e-05	0.0100144
chr15_38084224_38086545	chr15	38084224	38086545	2322	LINC01852	11234	CD14+ Monocyte	-0.558696	4.18034	19.5766	5.51399e-05	0.0100144
chr10_71366859_71367665	chr10	71366859	71367665	807	CDH23	29254	CD14+ Monocyte	-0.875282	3.65342	19.5657	5.55096e-05	0.0100569
chr9_93071321_93072232	chr9	93071321	93072232	912	SUSD3	12621	CD14+ Monocyte	1.09169	1.77642	19.3512	5.61189e-05	0.0101453
chr12_91947445_91948116	chr12	91947445	91948116	672	LINC01619	193597	CD14+ Monocyte	-1.24968	2.56031	19.531	5.62332e-05	0.0101453
chrX_131762645_131764375	chrX	131762645	131764375	1731	FIRRE	66268	CD14+ Monocyte	0.826143	2.35416	18.2086	5.6606e-05	0.0101912
chr19_5827671_5828720	chr19	5827671	5828720	1050	FUT6	10072	CD14+ Monocyte	0.779935	4.91889	19.4832	5.7061e-05	0.0102414
chr2_144671453_144672426	chr2	144671453	144672426	974	TEX41	3487	CD14+ Monocyte	-0.585896	3.82106	19.4834	5.71228e-05	0.0102414
chr1_48246775_48247156	chr1	48246775	48247156	382	SLC5A9	24060	CD14+ Monocyte	-1.17391	1.5816	19.3475	5.77637e-05	0.0102811
chr20_25076780_25078245	chr20	25076780	25078245	1466	VSX1	193	CD14+ Monocyte	1.04779	2.56855	19.4329	5.77894e-05	0.0102811
chr14_24250467_24251178	chr14	24250467	24251178	712	TINF2	7793	CD14+ Monocyte	1.68845	1.05936	18.8173	5.80202e-05	0.0102811
chr6_34244054_34244886	chr6	34244054	34244886	833	SMIM29	4120	CD14+ Monocyte	-0.676742	4.47796	19.4362	5.81132e-05	0.0102811
chr1_185375473_185376102	chr1	185375473	185376102	630	IVNS1ABP	58230	CD14+ Monocyte	-0.679068	4.01472	19.4337	5.8159e-05	0.0102811
chr2_98086628_98087505	chr2	98086628	98087505	878	VWA3B	339	CD14+ Monocyte	0.777006	3.77952	19.4284	5.83609e-05	0.0102811
chr16_73166140_73167272	chr16	73166140	73167272	1133	ZFHX3	21693	CD14+ Monocyte	-1.00745	2.50273	19.4437	5.83733e-05	0.0102811
chr8_116351832_116352764	chr8	116351832	116352764	933	EIF3H	403059	CD14+ Monocyte	-0.740771	3.95628	19.4202	5.84573e-05	0.0102811
chr6_12241581_12242658	chr6	12241581	12242658	1078	EDN1	47702	CD14+ Monocyte	-0.803061	2.52728	19.4232	5.85391e-05	0.0102811
chr6_25446812_25448060	chr6	25446812	25448060	1249	CARMIL1	167439	CD14+ Monocyte	-0.733678	3.80127	19.3966	5.90085e-05	0.0103406
chr1_248785869_248786824	chr1	248785869	248786824	956	LYPD8	30082	CD14+ Monocyte	-1.14609	2.56544	19.4003	5.91182e-05	0.0103406
chr20_3430342_3431284	chr20	3430342	3431284	943	C20orf194	22680	CD14+ Monocyte	-0.592918	3.90281	19.3761	5.94689e-05	0.0103809
chr15_40277524_40277910	chr15	40277524	40277910	387	PAK6	24347	CD14+ Monocyte	-1.00634	2.23996	19.325	6.01015e-05	0.0104701
chr19_1045261_1045483	chr19	1045261	1045483	223	ABCA7	5155	CD14+ Monocyte	1.10801	2.30547	19.2357	6.07894e-05	0.0105351
chr3_69330743_69331596	chr3	69330743	69331596	854	FRMD4B	54492	CD14+ Monocyte	-1.30767	2.02148	19.2935	6.08598e-05	0.0105351
chrX_45714632_45715456	chrX	45714632	45715456	825	LINC02595	136034	CD14+ Monocyte	-0.82743	2.77865	19.3223	6.08846e-05	0.0105351
chr21_45879971_45881024	chr21	45879971	45881024	1054	PCBP3	31822	CD14+ Monocyte	1.20449	2.06526	19.1953	6.14852e-05	0.0106038
chr1_24321494_24323022	chr1	24321494	24323022	1529	GRHL3	17	CD14+ Monocyte	0.699264	3.11192	19.2723	6.18955e-05	0.0106532
chr10_4107220_4107978	chr10	4107220	4107978	759	LINC00702	135934	CD14+ Monocyte	-0.778812	2.19999	19.2502	6.20731e-05	0.010661
chr10_99981645_99982334	chr10	99981645	99982334	690	DNMBP	27613	CD14+ Monocyte	-0.715348	2.6027	19.2659	6.22934e-05	0.010661
chr3_183243989_183245551	chr3	183243989	183245551	1563	B3GNT5	7701	CD14+ Monocyte	-0.585055	4.4391	19.2449	6.23662e-05	0.010661
chr19_8342760_8343786	chr19	8342760	8343786	1027	KANK3	502	CD14+ Monocyte	0.751591	3.56356	19.2506	6.24363e-05	0.010661
chr14_20612370_20612939	chr14	20612370	20612939	570	RNASE11	22112	CD14+ Monocyte	-0.982147	1.85716	19.1552	6.25847e-05	0.0106652
chr17_80206521_80207455	chr17	80206521	80207455	935	SGSH	12878	CD14+ Monocyte	-1.20723	2.39983	19.1464	6.34231e-05	0.0107442
chr3_40769556_40770984	chr3	40769556	40770984	1429	ZNF621	244597	CD14+ Monocyte	-0.95709	2.51961	19.1971	6.39577e-05	0.0108135
chr1_26287092_26287278	chr1	26287092	26287278	187	SH3BGRL3	7007	CD14+ Monocyte	-0.917247	2.54091	19.1382	6.43459e-05	0.0108486
chr5_131256902_131257167	chr5	131256902	131257167	266	CDC42SE2	6885	CD14+ Monocyte	-1.06316	1.40194	18.9119	6.44173e-05	0.0108486
chr1_209411294_209412373	chr1	209411294	209412373	1080	CAMK1G	171340	CD14+ Monocyte	-0.783809	3.36926	19.1572	6.46492e-05	0.0108611
chr2_47002050_47003320	chr2	47002050	47003320	1271	MCFD2	60195	CD14+ Monocyte	-0.841632	4.11676	19.1235	6.52884e-05	0.0109311
chr8_37691334_37691683	chr8	37691334	37691683	350	ZNF703	4098	CD14+ Monocyte	-1.20114	2.25883	19.0704	6.61449e-05	0.011053
chr19_7871429_7872367	chr19	7871429	7872367	939	PRR36	2023	CD14+ Monocyte	0.683309	4.16884	19.0782	6.64395e-05	0.0110807
chr19_45498435_45499622	chr19	45498435	45499622	1188	PPM1N	37	CD14+ Monocyte	0.642432	3.64852	19.0543	6.72043e-05	0.0111866
chr1_221780999_221781734	chr1	221780999	221781734	736	DUSP10	38823	CD14+ Monocyte	-0.585671	3.96523	19.0393	6.73963e-05	0.0111969
chr18_331322_332390	chr18	331322	332390	1069	THOC1	63275	CD14+ Monocyte	-1.23778	1.68996	18.9025	6.76054e-05	0.01121
chr3_45537604_45538893	chr3	45537604	45538893	1290	LIMD1	55857	CD14+ Monocyte	-0.835513	3.12442	19.0186	6.81834e-05	0.0112668
chr4_67558457_67559120	chr4	67558457	67559120	664	STAP1	269	CD14+ Monocyte	1.03352	1.91211	18.8886	6.82098e-05	0.0112668
chr3_67655367_67655906	chr3	67655367	67655906	540	SUCLG2-AS1	671	CD14+ Monocyte	0.69531	2.24996	18.9865	6.84291e-05	0.0112814
chr4_14848013_14848667	chr4	14848013	14848667	655	LINC00504	39502	CD14+ Monocyte	-1.23197	1.23884	18.7551	6.92458e-05	0.0113724
chr4_123232268_123232954	chr4	123232268	123232954	687	SPRY1	163840	CD14+ Monocyte	-0.945535	2.11924	18.9339	7.02549e-05	0.0115162
chr5_157248702_157249643	chr5	157248702	157249643	942	CYFIP2	16479	CD14+ Monocyte	-0.853772	3.05521	18.9226	7.06992e-05	0.0115351
chr5_62640251_62640975	chr5	62640251	62640975	725	LRRC70	61433	CD14+ Monocyte	-1.14778	1.86851	18.8791	7.09063e-05	0.0115351
chr19_17847517_17848465	chr19	17847517	17848465	949	JAK3	465	CD14+ Monocyte	0.722684	3.44162	18.8721	7.20198e-05	0.0116572
chr15_100559148_100560959	chr15	100559148	100560959	1812	CERS3	14465	CD14+ Monocyte	-1.06073	3.03996	18.8719	7.20963e-05	0.0116572
chr6_73514278_73514937	chr6	73514278	73514937	660	EEF1A1	6095	CD14+ Monocyte	0.719818	2.59883	18.8566	7.25723e-05	0.0116737
chr10_19993604_19994644	chr10	19993604	19994644	1041	PLXDC2	177173	CD14+ Monocyte	-1.12112	1.68208	18.6866	7.32275e-05	0.0117014
chr8_144455815_144457428	chr8	144455815	144457428	1614	CYHR1	5443	CD14+ Monocyte	1.03419	3.58228	18.8144	7.35703e-05	0.0117014
chr13_74290302_74290758	chr13	74290302	74290758	457	LINC00402	58859	CD14+ Monocyte	-1.16484	2.26704	18.8037	7.36588e-05	0.0117014
chr20_63814606_63817315	chr20	63814606	63817315	2710	ZBTB46-AS1	6531	CD14+ Monocyte	0.886023	2.99908	18.7795	7.37853e-05	0.0117014
chr12_121059710_121061020	chr12	121059710	121061020	1311	OASL	20468	CD14+ Monocyte	0.551607	3.87855	18.8022	7.37909e-05	0.0117014
chr7_95595915_95597184	chr7	95595915	95597184	1270	PDK4	601	CD14+ Monocyte	-0.834551	4.54618	18.7944	7.38325e-05	0.0117014
chr20_3672639_3673246	chr20	3672639	3673246	608	SIGLEC1	33988	CD14+ Monocyte	1.28091	1.55699	18.4349	7.45545e-05	0.0117659
chr19_4313458_4314685	chr19	4313458	4314685	1228	FSD1	8861	CD14+ Monocyte	1.60414	1.68607	18.3797	7.46326e-05	0.0117659
chr5_79106808_79107758	chr5	79106808	79107758	951	BHMT	4050	CD14+ Monocyte	-1.02526	2.15892	18.7684	7.48835e-05	0.0117659
chr7_114932725_114934374	chr7	114932725	114934374	1650	MDFIC	10572	CD14+ Monocyte	-0.646234	3.28496	18.7662	7.49738e-05	0.0117659
chr3_41137463_41138696	chr3	41137463	41138696	1234	CTNNB1	60808	CD14+ Monocyte	-1.01724	2.64791	18.7654	7.52921e-05	0.0117659
chr3_71973251_71973788	chr3	71973251	71973788	538	LINC00877	126667	CD14+ Monocyte	-1.40138	1.81594	18.6287	7.53595e-05	0.0117659
chr1_46532748_46533670	chr1	46532748	46533670	923	MKNK1-AS1	5025	CD14+ Monocyte	0.772594	2.85266	18.7492	7.54047e-05	0.0117659
chr15_75224386_75227043	chr15	75224386	75227043	2658	C15orf39	22505	CD14+ Monocyte	0.993524	2.75775	18.7334	7.54434e-05	0.0117659
chr1_192904498_192904833	chr1	192904498	192904833	336	RGS2	95460	CD14+ Monocyte	-1.83807	0.828806	18.0227	7.54696e-05	0.0117659
chr3_144028523_144029515	chr3	144028523	144029515	993	DIPK2A	55443	CD14+ Monocyte	-0.570481	3.51573	18.72	7.60795e-05	0.0118395
chr4_14168986_14169225	chr4	14168986	14169225	240	LINC01182	513808	CD14+ Monocyte	-1.60468	1.04147	18.1945	7.67561e-05	0.0119018
chr1_89545349_89545971	chr1	89545349	89545971	623	LRRC8B	20521	CD14+ Monocyte	-1.51078	0.720276	18.1095	7.71497e-05	0.0119228
chr2_6880303_6880662	chr2	6880303	6880662	360	RSAD2	2527	CD14+ Monocyte	1.87173	1.07298	18.2005	7.71692e-05	0.0119228
chr11_35250357_35251115	chr11	35250357	35251115	759	CD44	111187	CD14+ Monocyte	-1.09715	1.91539	18.6325	7.73614e-05	0.0119311
chr16_86604319_86605242	chr16	86604319	86605242	924	FOXC2	37491	CD14+ Monocyte	1.22859	1.66402	18.4502	7.81128e-05	0.011971
chr9_16289389_16290619	chr9	16289389	16290619	1231	BNC2-AS1	436194	CD14+ Monocyte	-0.753631	3.78584	18.6295	7.86719e-05	0.0120255
chr2_55093484_55094061	chr2	55093484	55094061	578	RTN4	42212	CD14+ Monocyte	-1.0834	1.80196	18.5168	7.90243e-05	0.0120366
chr14_68957452_68958317	chr14	68957452	68958317	866	ACTN1	20985	CD14+ Monocyte	-0.870821	2.06665	18.5896	7.93149e-05	0.0120541
chr7_106279816_106280109	chr7	106279816	106280109	294	NAMPT	4874	CD14+ Monocyte	0.983201	2.47078	18.5803	7.94192e-05	0.0120541
chr19_55178946_55180544	chr19	55178946	55180544	1599	SYT5	255	CD14+ Monocyte	0.828912	3.32989	18.5955	7.99249e-05	0.0121095
chr8_67727237_67727805	chr8	67727237	67727805	569	CPA6	18555	CD14+ Monocyte	-1.50875	0.952487	18.0441	8.09993e-05	0.0121705
chr17_30728361_30729036	chr17	30728361	30729036	676	CRLF3	95656	CD14+ Monocyte	-0.532787	4.28687	18.5486	8.1049e-05	0.0121705
chr4_53919448_53920506	chr4	53919448	53920506	1059	CHIC2	144099	CD14+ Monocyte	-0.730382	3.86252	18.5495	8.10688e-05	0.0121705
chr12_122080486_122080755	chr12	122080486	122080755	270	MLXIP	1731	CD14+ Monocyte	-0.673165	3.32523	18.5426	8.14199e-05	0.0121705
chr3_69326860_69327175	chr3	69326860	69327175	316	FRMD4B	58913	CD14+ Monocyte	-1.41001	0.89614	18.0867	8.16037e-05	0.0121705
chr3_81485250_81486019	chr3	81485250	81486019	770	GBE1	275626	CD14+ Monocyte	-1.09561	2.12216	18.5103	8.16393e-05	0.0121705
chr8_27340474_27341139	chr8	27340474	27341139	666	PTK2B	14911	CD14+ Monocyte	-0.679711	3.64086	18.5329	8.17554e-05	0.0121705
chr8_20086604_20087322	chr8	20086604	20087322	719	SLC18A1	95814	CD14+ Monocyte	-0.975611	2.31749	18.527	8.17968e-05	0.0121705
chr12_91876917_91877665	chr12	91876917	91877665	749	LINC01619	264048	CD14+ Monocyte	-0.846907	3.86175	18.5155	8.21534e-05	0.0121705
chr7_72052636_72053753	chr7	72052636	72053753	1118	CALN1	283638	CD14+ Monocyte	-1.48278	1.53789	18.4107	8.22145e-05	0.0121705
chr10_89309931_89310728	chr10	89309931	89310728	798	IFIT2	7886	CD14+ Monocyte	2.66515	0.592134	17.7649	8.24202e-05	0.0121705
chr14_51789190_51790307	chr14	51789190	51790307	1118	GNG2	70304	CD14+ Monocyte	-0.786028	3.09556	18.5156	8.24414e-05	0.0121705
chr22_38947148_38947775	chr22	38947148	38947775	628	APOBEC3A	9833	CD14+ Monocyte	-0.694866	3.9388	18.5064	8.24493e-05	0.0121705
chr6_47165819_47166270	chr6	47165819	47166270	452	ADGRF1	123487	CD14+ Monocyte	-0.978068	2.14218	18.4796	8.28042e-05	0.0121797
chr13_95564390_95565443	chr13	95564390	95565443	1054	CLDN10	11671	CD14+ Monocyte	-0.663863	3.59304	18.4931	8.29359e-05	0.0121797
chr4_139933668_139935075	chr4	139933668	139935075	1408	MAML3	219109	CD14+ Monocyte	-1.2657	1.42135	18.2742	8.31727e-05	0.0121932
chr7_150609800_150610781	chr7	150609800	150610781	982	GIMAP6	21604	CD14+ Monocyte	3.09774	0.948257	17.823	8.33725e-05	0.0121932
chr9_87556691_87557301	chr9	87556691	87557301	611	DAPK1-IT1	3238	CD14+ Monocyte	-0.935361	2.53426	18.4852	8.34528e-05	0.0121932
chr14_56333366_56334295	chr14	56333366	56334295	930	PELI2	214956	CD14+ Monocyte	-0.620968	3.1443	18.4774	8.35951e-05	0.0121933
chr1_226677136_226677745	chr1	226677136	226677745	610	ITPKB-IT1	2068	CD14+ Monocyte	-0.642784	3.66036	18.4577	8.40389e-05	0.0122166
chr9_137492531_137492890	chr9	137492531	137492890	360	NSMF	33197	CD14+ Monocyte	1.70812	0.857964	17.9295	8.43207e-05	0.0122176
chr6_134420408_134420958	chr6	134420408	134420958	551	LINC01010	16757	CD14+ Monocyte	-1.2259	1.93013	18.4038	8.44134e-05	0.0122176
chr2_112811604_112812637	chr2	112811604	112812637	1034	IL1B	24142	CD14+ Monocyte	-0.862254	3.01149	18.4488	8.44719e-05	0.0122176
chr8_139705534_139706367	chr8	139705534	139706367	834	KCNK9	2411	CD14+ Monocyte	0.525789	4.35442	18.3962	8.58772e-05	0.0123793
chr15_66390711_66390998	chr15	66390711	66390998	288	MAP2K1	3800	CD14+ Monocyte	-0.799942	3.38662	18.3621	8.72088e-05	0.0125502
chr2_68831872_68832919	chr2	68831872	68832919	1048	BMP10	38478	CD14+ Monocyte	-0.533826	5.45325	18.343	8.75426e-05	0.012558
chr8_95120809_95121479	chr8	95120809	95121479	671	PLEKHF2	12305	CD14+ Monocyte	-0.868882	2.64248	18.3508	8.78269e-05	0.0125644
chr3_12303333_12304415	chr3	12303333	12304415	1083	PPARG	1359	CD14+ Monocyte	-0.654958	4.0869	18.3358	8.78915e-05	0.0125644
chr13_113509821_113510565	chr13	113509821	113510565	745	TMCO3	18801	CD14+ Monocyte	4.44379	2.10966	17.9783	8.83215e-05	0.012574
chr7_69208378_69209462	chr7	69208378	69209462	1085	CT66	388162	CD14+ Monocyte	-1.21182	1.7924	18.3232	8.83339e-05	0.012574
chr5_156991596_156992083	chr5	156991596	156992083	488	TIMD4	28370	CD14+ Monocyte	-1.26412	0.946163	18.0874	8.83973e-05	0.012574
chr8_96924106_96924469	chr8	96924106	96924469	364	CPQ	278865	CD14+ Monocyte	-1.36106	0.956612	17.776	8.86427e-05	0.0125881
chr2_176637381_176638572	chr2	176637381	176638572	1192	LINC01116	193	CD14+ Monocyte	0.948935	1.95955	18.1839	8.90438e-05	0.0126155
chr3_30227701_30228602	chr3	30227701	30228602	902	LINC01985	290265	CD14+ Monocyte	-0.952604	2.72873	18.311	8.91285e-05	0.0126155
chr22_37541868_37542401	chr22	37541868	37542401	534	CDC42EP1	18078	CD14+ Monocyte	-0.970159	2.79834	18.2868	8.98451e-05	0.012696
chr8_134026485_134027596	chr8	134026485	134027596	1112	ST3GAL1	454598	CD14+ Monocyte	-0.768514	2.42738	18.281	9.00135e-05	0.012699
chr1_41003354_41004313	chr1	41003354	41004313	960	SLFNL1-AS1	10276	CD14+ Monocyte	-0.733623	3.94981	18.2635	9.03704e-05	0.0127077
chr1_82225296_82226359	chr1	82225296	82226359	1064	ADGRL2	422844	CD14+ Monocyte	-0.597416	3.53245	18.2554	9.07161e-05	0.0127355
chr8_143025716_143026800	chr8	143025716	143026800	1085	LY6E	7188	CD14+ Monocyte	0.710629	5.22324	18.2239	9.16003e-05	0.0128178
chr4_27084760_27085328	chr4	27084760	27085328	569	LINC02261	132150	CD14+ Monocyte	-1.01108	1.29669	18.0561	9.2079e-05	0.0128639
chr19_55160308_55161161	chr19	55160308	55161161	854	TNNI3	2576	CD14+ Monocyte	0.767486	3.83127	18.196	9.27987e-05	0.0129434
chr2_161146523_161147800	chr2	161146523	161147800	1278	TANK	9561	CD14+ Monocyte	1.49456	1.2638	17.7517	9.32966e-05	0.0129918
chr4_120921785_120923265	chr4	120921785	120923265	1481	PRDM5	539	CD14+ Monocyte	1.55082	2.38757	18.0596	9.3624e-05	0.0129934
chr4_7102781_7104055	chr4	7102781	7104055	1275	LINC02447	595	CD14+ Monocyte	0.559348	4.0073	18.1673	9.37327e-05	0.0129934
chr16_29115101_29116092	chr16	29115101	29116092	992	LAT	130050	CD14+ Monocyte	-0.931527	3.52618	18.1306	9.52265e-05	0.0131752
chr20_40765827_40766538	chr20	40765827	40766538	712	MAFB	76591	CD14+ Monocyte	-0.868793	2.22421	18.086	9.62394e-05	0.0132688
chr1_192951930_192952505	chr1	192951930	192952505	576	UCHL5	106855	CD14+ Monocyte	-0.673419	3.40812	18.1007	9.6365e-05	0.0132688
chr2_215699885_215701548	chr2	215699885	215701548	1664	LINC01614	16494	CD14+ Monocyte	-0.622021	3.96978	18.0778	9.69893e-05	0.0133226
chr11_43788188_43789061	chr11	43788188	43789061	874	ALKBH3	91769	CD14+ Monocyte	-0.757375	3.11672	18.0783	9.71872e-05	0.0133226
chr7_76445233_76446280	chr7	76445233	76446280	1048	DTX2	15374	CD14+ Monocyte	-1.1383	1.88347	17.9094	9.72201e-05	0.0133226
chr1_40802057_40803036	chr1	40802057	40803036	980	KCNQ4	18271	CD14+ Monocyte	0.727398	3.75986	18.0576	9.77932e-05	0.0133588
chr1_178192484_178193208	chr1	178192484	178193208	725	RASAL2	98381	CD14+ Monocyte	-0.94267	2.63892	18.0698	9.77948e-05	0.0133588
chr6_11404802_11405710	chr6	11404802	11405710	909	NEDD9	22454	CD14+ Monocyte	-0.863058	2.64101	18.0526	9.83818e-05	0.0134177
chr1_115641625_115643191	chr1	115641625	115643191	1567	VANGL1	344	CD14+ Monocyte	0.928785	2.71991	18.0246	9.94547e-05	0.0134913
chr1_53555593_53557664	chr1	53555593	53557664	2072	LINC01771	227361	CD14+ Monocyte	1.66099	1.56687	17.6438	9.95672e-05	0.0134913
chr15_83099457_83100812	chr15	83099457	83100812	1356	TM6SF1	6832	CD14+ Monocyte	-0.832956	2.50499	18.0231	9.95982e-05	0.0134913
chr20_52190878_52192612	chr20	52190878	52192612	1735	ZFP64	627	CD14+ Monocyte	0.588496	3.84746	17.9892	0.000100355	0.0135529
chr9_129198382_129198796	chr9	129198382	129198796	415	IER5L	20121	CD14+ Monocyte	-1.16441	2.10772	17.9628	0.000100476	0.0135529
chr19_18274368_18275599	chr19	18274368	18275599	1232	IQCN	84	CD14+ Monocyte	0.504465	5.78656	17.9533	0.000101546	0.0136405
chr8_67377351_67378152	chr8	67377351	67378152	802	ARFGEF1	33570	CD14+ Monocyte	-1.20041	0.98962	17.5508	0.000101601	0.0136405
chr11_33248321_33249053	chr11	33248321	33249053	733	HIPK3	7618	CD14+ Monocyte	-1.20362	1.21689	17.6166	0.000102832	0.0137842
chr10_127977494_127978195	chr10	127977494	127978195	702	PTPRE	9084	CD14+ Monocyte	-0.944953	2.76931	17.9321	0.000102992	0.0137842
chr8_133138916_133140020	chr8	133138916	133140020	1105	SLA	36314	CD14+ Monocyte	-0.5669	5.13266	17.8977	0.000103736	0.0138092
chr11_63631417_63632039	chr11	63631417	63632039	623	PLAAT3	16948	CD14+ Monocyte	-1.05033	2.17907	17.7945	0.000103754	0.0138092
chr6_105691149_105691647	chr6	105691149	105691647	499	PREP	288067	CD14+ Monocyte	-0.998743	1.97568	17.8908	0.000103981	0.0138092
chr8_119962153_119962882	chr8	119962153	119962882	730	DEPTOR	88432	CD14+ Monocyte	-1.30591	1.47043	17.7268	0.000104296	0.0138297
chr5_96651174_96651462	chr5	96651174	96651462	289	CAST	10574	CD14+ Monocyte	-1.11862	1.35791	17.6327	0.000104555	0.0138428
chr13_75541172_75541765	chr13	75541172	75541765	594	COMMD6	3300	CD14+ Monocyte	-0.639082	3.65026	17.8722	0.000104972	0.0138727
chr7_139945870_139947181	chr7	139945870	139947181	1312	PARP12	115770	CD14+ Monocyte	1.06652	2.43916	17.8115	0.000106158	0.0139905
chr6_162156987_162157583	chr6	162156987	162157583	597	PACRG	569548	CD14+ Monocyte	-1.34978	0.982126	17.5081	0.000106477	0.014011
chr13_80173183_80173563	chr13	80173183	80173563	381	SPRY2	166096	CD14+ Monocyte	-0.639479	3.45308	17.8225	0.000107039	0.0140451
chr2_96257680_96258438	chr2	96257680	96258438	759	TMEM127	7559	CD14+ Monocyte	-0.560247	3.84081	17.8207	0.000107063	0.0140451
chr12_92911229_92912722	chr12	92911229	92912722	1494	EEA1	16573	CD14+ Monocyte	-0.636232	3.74585	17.8085	0.00010759	0.0140928
chr18_379458_380518	chr18	379458	380518	1061	THOC1	111411	CD14+ Monocyte	-0.563558	4.45116	17.7902	0.000108132	0.0141423
chr11_313495_314928	chr11	313495	314928	1434	IFITM1	544	CD14+ Monocyte	0.908499	3.57827	17.792	0.000108483	0.0141666
chr7_104883586_104884360	chr7	104883586	104884360	775	LHFPL3-AS2	42285	CD14+ Monocyte	-0.56137	3.61579	17.7745	0.000108957	0.0141934
chr6_118580739_118582239	chr6	118580739	118582239	1501	PLN	32444	CD14+ Monocyte	-0.595592	4.02994	17.7706	0.000109018	0.0141934
chr11_399738_400357	chr11	399738	400357	620	SIGIRR	14642	CD14+ Monocyte	1.52935	1.43077	17.4175	0.000110213	0.0142671
chr12_95204147_95206083	chr12	95204147	95206083	1937	FGD6	11384	CD14+ Monocyte	-0.733776	2.97742	17.7535	0.000110247	0.0142671
chr14_84036803_84037315	chr14	84036803	84037315	513	LINC00911	1356563	CD14+ Monocyte	-1.77685	1.11542	17.4399	0.000110557	0.0142858
chr5_90696040_90696680	chr5	90696040	90696680	641	ADGRV1	137244	CD14+ Monocyte	-0.823051	2.82941	17.7385	0.000110978	0.0143187
chr12_12613341_12613819	chr12	12613341	12613819	479	CREBL2	1466	CD14+ Monocyte	-0.787835	2.1855	17.7089	0.000111188	0.0143243
chr3_27540153_27540638	chr3	27540153	27540638	486	SLC4A7	55769	CD14+ Monocyte	-1.528	0.713675	17.1223	0.000113355	0.0145395
chr5_113047298_113048483	chr5	113047298	113048483	1186	DCP2	70501	CD14+ Monocyte	-0.763279	3.51073	17.6611	0.000113884	0.0145622
chr1_999162_999408	chr1	999162	999408	247	HES4	689	CD14+ Monocyte	1.37582	1.76127	17.1589	0.000114	0.0145622
chr15_42168189_42168823	chr15	42168189	42168823	635	VPS39	39481	CD14+ Monocyte	1.30442	1.46161	17.2832	0.000114264	0.0145622
chr2_96163405_96165196	chr2	96163405	96165196	1792	DUSP2	17965	CD14+ Monocyte	1.23624	1.323	17.3227	0.000114388	0.0145622
chr18_13222086_13223139	chr18	13222086	13223139	1054	LDLRAD4	3327	CD14+ Monocyte	-0.890896	2.97736	17.6391	0.000115222	0.0146229
chr14_72528309_72528825	chr14	72528309	72528825	517	DPF3	363824	CD14+ Monocyte	-1.289	1.50866	17.5148	0.000115572	0.0146229
chr6_124819097_124819888	chr6	124819097	124819888	792	RNF217	142656	CD14+ Monocyte	-0.547786	3.73928	17.6114	0.00011597	0.0146229
chr6_35213582_35214650	chr6	35213582	35214650	1069	SCUBE3	373	CD14+ Monocyte	1.05771	1.59383	17.4318	0.000116098	0.0146229
chr2_26477073_26478374	chr2	26477073	26478374	1302	OTOF	250	CD14+ Monocyte	1.8523	2.38761	17.4539	0.000116293	0.0146229
chr7_17406821_17407420	chr7	17406821	17407420	600	AHR	108170	CD14+ Monocyte	-0.991463	1.92028	17.5272	0.000117022	0.0146378
chr5_136000864_136001937	chr5	136000864	136001937	1074	TGFBI	27050	CD14+ Monocyte	-0.593666	3.49576	17.5927	0.000117024	0.0146378
chr3_128867085_128867870	chr3	128867085	128867870	786	ACAD9	11619	CD14+ Monocyte	1.61231	2.30941	17.3881	0.000117341	0.0146394
chr7_22565131_22565979	chr7	22565131	22565979	849	STEAP1B	64849	CD14+ Monocyte	-0.942677	2.89412	17.5844	0.000117547	0.0146394
chr12_110000125_110000318	chr12	110000125	110000318	194	ANKRD13A	696	CD14+ Monocyte	0.818459	1.90111	17.462	0.000118686	0.0147599
chr19_16142285_16144283	chr19	16142285	16144283	1999	HSH2D	599	CD14+ Monocyte	0.574006	4.72996	17.5377	0.000119186	0.0148007
chr19_7605253_7606144	chr19	7605253	7606144	892	CAMSAP3	9391	CD14+ Monocyte	1.23174	3.16361	17.4318	0.00012117	0.0149862
chr1_157505476_157506259	chr1	157505476	157506259	784	FCRL5	46256	CD14+ Monocyte	1.18507	1.2049	17.1158	0.000121218	0.0149862
chr19_18127960_18128621	chr19	18127960	18128621	662	PIK3R2	24541	CD14+ Monocyte	0.806112	3.53161	17.4955	0.000121527	0.0149862
chr10_78960303_78961098	chr10	78960303	78961098	796	ZMIZ1-AS1	106350	CD14+ Monocyte	-0.94144	2.04854	17.4807	0.00012155	0.0149862
chr2_181991277_181992031	chr2	181991277	181992031	755	PPP1R1C	5425	CD14+ Monocyte	-1.27023	2.64141	17.5002	0.00012173	0.0149869
chr4_123418404_123418987	chr4	123418404	123418987	584	SPRY1	18865	CD14+ Monocyte	-1.00267	2.04717	17.4642	0.000122182	0.015021
chr11_121828961_121829757	chr11	121828961	121829757	797	MIR100HG	271089	CD14+ Monocyte	-1.22405	2.01804	17.457	0.000122511	0.0150392
chr3_54967265_54968411	chr3	54967265	54968411	1147	LRTM1	163	CD14+ Monocyte	-0.70207	3.40748	17.44	0.000124017	0.0151345
chr9_134890881_134892059	chr9	134890881	134892059	1179	FCN2	10070	CD14+ Monocyte	0.907735	2.03892	17.3733	0.000124076	0.0151345
chr12_108907944_108908308	chr12	108907944	108908308	365	DAO	27853	CD14+ Monocyte	-1.09123	1.99607	17.3882	0.000124245	0.0151345
chr5_163947164_163948289	chr5	163947164	163948289	1126	MAT2B	441546	CD14+ Monocyte	-1.07557	2.16735	17.4229	0.000124381	0.0151345
chr1_198162358_198162821	chr1	198162358	198162821	464	NEK7	5361	CD14+ Monocyte	-0.816876	2.42883	17.439	0.000124511	0.0151345
chr12_10200408_10201382	chr12	10200408	10201382	975	GABARAPL1	11494	CD14+ Monocyte	-0.981204	1.99785	17.4033	0.000124908	0.0151444
chr3_185537174_185538068	chr3	185537174	185538068	895	LIPH	14520	CD14+ Monocyte	-0.579441	3.86951	17.4164	0.000124945	0.0151444
chr8_127426649_127427485	chr8	127426649	127427485	837	POU5F1B	10825	CD14+ Monocyte	-0.767009	3.42646	17.4093	0.00012549	0.015189
chr1_161499268_161500488	chr1	161499268	161500488	1221	FCGR2A	4968	CD14+ Monocyte	-0.761127	2.75456	17.3976	0.000125973	0.0152048
chr1_109899982_109900787	chr1	109899982	109900787	806	CSF1	10061	CD14+ Monocyte	-0.828391	3.03676	17.3631	0.000127839	0.0153869
chr3_149447954_149449050	chr3	149447954	149449050	1097	TM4SF4	25646	CD14+ Monocyte	-0.580481	4.3852	17.3478	0.000128203	0.0154091
chr8_96926682_96927634	chr8	96926682	96927634	953	CPQ	281441	CD14+ Monocyte	-0.647076	3.94034	17.3239	0.000129477	0.0154791
chr2_8234024_8235027	chr2	8234024	8235027	1004	LINC00299	93392	CD14+ Monocyte	-0.638272	3.7456	17.3127	0.000130153	0.0154791
chr12_108913733_108914794	chr12	108913733	108914794	1062	DAO	33642	CD14+ Monocyte	-0.78053	2.89265	17.3173	0.000130163	0.0154791
chr17_34249578_34249818	chr17	34249578	34249818	241	CCL2	5466	CD14+ Monocyte	1.18488	2.11255	17.2256	0.000130292	0.0154791
chr9_132252346_132252877	chr9	132252346	132252877	532	NTNG2	90289	CD14+ Monocyte	0.962015	1.95067	17.244	0.000130355	0.0154791
chr16_50879906_50880440	chr16	50879906	50880440	535	LINC02168	73235	CD14+ Monocyte	2.3685	0.300074	16.4093	0.000131253	0.0154791
chr6_53258684_53259124	chr6	53258684	53259124	441	ELOVL5	89826	CD14+ Monocyte	1.56648	0.614924	16.7006	0.000131265	0.0154791
chr4_184510168_184510887	chr4	184510168	184510887	720	LINC02427	26696	CD14+ Monocyte	-0.738086	3.07871	17.2923	0.000131494	0.0154791
chr1_33379650_33380697	chr1	33379650	33380697	1048	PHC2	12088	CD14+ Monocyte	1.46401	1.18168	16.8579	0.000131672	0.0154791
chr4_146143642_146144472	chr4	146143642	146144472	831	LINC01095	21729	CD14+ Monocyte	-0.598705	3.88818	17.2786	0.000131749	0.0154791
chr17_47572513_47573170	chr17	47572513	47573170	658	NPEPPS	41406	CD14+ Monocyte	1.66632	1.21898	16.771	0.000131827	0.0154791
chr3_40623463_40624803	chr3	40623463	40624803	1341	ZNF621	98504	CD14+ Monocyte	0.768525	3.71416	17.2813	0.000131856	0.0154791
chr1_68245485_68246316	chr1	68245485	68246316	832	WLS	12939	CD14+ Monocyte	-1.37469	1.05104	16.9009	0.000131964	0.0154791
chr9_112867410_112868141	chr9	112867410	112868141	732	SLC46A2	22735	CD14+ Monocyte	-0.715664	3.49972	17.2793	0.00013201	0.0154791
chr14_54706418_54707210	chr14	54706418	54707210	793	SAMD4A	47622	CD14+ Monocyte	1.39427	1.10775	16.9191	0.000132679	0.0154791
chr17_19302904_19303402	chr17	19302904	19303402	499	EPN2-AS1	2859	CD14+ Monocyte	-0.976308	2.68656	17.2637	0.000132924	0.0154791
chr5_173781704_173782572	chr5	173781704	173782572	869	LINC01485	8370	CD14+ Monocyte	-0.53622	4.57788	17.251	0.000133091	0.0154791
chr20_62501683_62502563	chr20	62501683	62502563	881	MIR1-1HG-AS1	48998	CD14+ Monocyte	0.906133	3.87438	17.2534	0.000133202	0.0154791
chr6_37397401_37398592	chr6	37397401	37398592	1192	CMTR1	34628	CD14+ Monocyte	1.00225	2.69509	17.2528	0.000133355	0.0154791
chr1_169608246_169608629	chr1	169608246	169608629	384	SELP	21495	CD14+ Monocyte	-0.766282	2.79024	17.2572	0.000133394	0.0154791
chr16_75075019_75076031	chr16	75075019	75076031	1013	LDHD	40741	CD14+ Monocyte	0.799572	1.929	17.1997	0.000133583	0.0154791
chr8_104163392_104164177	chr8	104163392	104164177	786	RIMS2	59157	CD14+ Monocyte	-1.79059	1.96205	17.0675	0.000133585	0.0154791
chr20_5657390_5657895	chr20	5657390	5657895	506	GPCPD1	46384	CD14+ Monocyte	-0.63731	4.25537	17.2324	0.000134178	0.0155073
chr22_45225905_45227095	chr22	45225905	45227095	1191	KIAA0930	13521	CD14+ Monocyte	0.610578	5.03811	17.2281	0.000134246	0.0155073
chr20_20261108_20261640	chr20	20261108	20261640	533	INSM1	106463	CD14+ Monocyte	-0.504221	3.80878	17.203	0.000135741	0.0156188
chr3_46699740_46700356	chr3	46699740	46700356	617	TMIE	1035	CD14+ Monocyte	-0.621025	3.90524	17.2011	0.0001358	0.0156188
chr4_657190_658709	chr4	657190	658709	1520	PDE6B	4014	CD14+ Monocyte	1.40757	1.79899	16.8724	0.000135828	0.0156188
chr18_45656166_45657065	chr18	45656166	45657065	900	SLC14A2	40691	CD14+ Monocyte	-1.29253	1.40133	17.0677	0.000136072	0.0156188
chr2_176269173_176270230	chr2	176269173	176270230	1058	MTX2	268	CD14+ Monocyte	0.632056	3.31182	17.1668	0.00013797	0.0157891
chr3_47347000_47347968	chr3	47347000	47347968	969	PTPN23	33052	CD14+ Monocyte	-0.668024	2.80315	17.1601	0.000138523	0.0158313
chr5_17359467_17360029	chr5	17359467	17360029	563	LINC02217	43989	CD14+ Monocyte	-1.36575	1.1067	16.8082	0.000139294	0.0158984
chr4_123599121_123600636	chr4	123599121	123600636	1516	LINC01091	49354	CD14+ Monocyte	-0.537855	3.48812	17.1332	0.000139562	0.0159078
chr7_131238012_131238963	chr7	131238012	131238963	952	MKLN1-AS	88816	CD14+ Monocyte	-0.592932	3.9645	17.1167	0.00014033	0.0159742
chr7_151485043_151485923	chr7	151485043	151485923	881	RHEB	33972	CD14+ Monocyte	-1.1486	1.80054	16.9933	0.000141712	0.0160979
chr9_89663060_89663480	chr9	89663060	89663480	421	GADD45G	58049	CD14+ Monocyte	-0.987073	1.17386	16.9193	0.00014227	0.0160979
chr6_161355596_161357347	chr6	161355596	161357347	1752	AGPAT4	81535	CD14+ Monocyte	-0.503712	4.72903	17.0779	0.000142315	0.0160979
chr12_94682461_94683572	chr12	94682461	94683572	1112	TMCC3	31904	CD14+ Monocyte	-0.828479	2.01422	17.0159	0.000143021	0.0161524
chr8_21908831_21909501	chr8	21908831	21909501	671	DOK2	4189	CD14+ Monocyte	-0.738009	3.56647	17.0454	0.000144477	0.0162741
chr4_82651831_82652575	chr4	82651831	82652575	745	TMEM150C	89578	CD14+ Monocyte	-1.00047	1.99011	17.0224	0.000144823	0.0162917
chr6_43246671_43247927	chr6	43246671	43247927	1257	TTBK1	3191	CD14+ Monocyte	0.552307	4.17702	17.0272	0.000145255	0.016319
chr6_160986790_160987134	chr6	160986790	160987134	345	MAP3K4	4592	CD14+ Monocyte	-1.0654	1.68683	16.9512	0.000146045	0.0163775
chr18_35502116_35502455	chr18	35502116	35502455	340	INO80C	4156	CD14+ Monocyte	-0.746649	2.75825	17.0215	0.000146156	0.0163775
chr12_54407580_54407936	chr12	54407580	54407936	357	ITGA5	11330	CD14+ Monocyte	-0.831433	3.13964	17.0128	0.000146516	0.0163803
chr3_156815893_156817637	chr3	156815893	156817637	1745	LINC00886	575	CD14+ Monocyte	0.638074	6.09989	16.9926	0.000147051	0.0163803
chr4_176089482_176090755	chr4	176089482	176090755	1274	WDR17	23642	CD14+ Monocyte	-0.681254	3.39998	16.9997	0.000147071	0.0163803
chr2_241881129_241882468	chr2	241881129	241882468	1340	LINC01237	233	CD14+ Monocyte	0.587841	5.79244	16.9912	0.000147133	0.0163803
chr6_124443440_124443892	chr6	124443440	124443892	453	NKAIN2	160436	CD14+ Monocyte	-1.44843	1.15179	16.7067	0.000147435	0.0163927
chr20_20823502_20824218	chr20	20823502	20824218	717	RALGAPA2	110858	CD14+ Monocyte	-0.832069	2.71169	16.9956	0.000147906	0.0164177
chr10_6298012_6298503	chr10	6298012	6298503	492	LINC02649	28040	CD14+ Monocyte	-0.843555	2.64134	16.9762	0.000148042	0.0164177
chr20_4154805_4155469	chr20	4154805	4155469	665	SMOX	5978	CD14+ Monocyte	0.632205	4.16224	16.9673	0.000148681	0.016439
chr9_133830161_133830721	chr9	133830161	133830721	561	SARDH	90206	CD14+ Monocyte	1.54818	1.34873	16.6829	0.000148773	0.016439
chr19_12884962_12885972	chr19	12884962	12885972	1011	KLF1	1229	CD14+ Monocyte	0.623813	4.23641	16.9672	0.000148806	0.016439
chr19_1507628_1508411	chr19	1507628	1508411	784	ADAMTSL5	4608	CD14+ Monocyte	0.680894	4.18836	16.9609	0.000149158	0.0164565
chr20_50346459_50346804	chr20	50346459	50346804	346	LINC01271	25117	CD14+ Monocyte	-1.00057	1.86787	16.7356	0.000149514	0.0164565
chr12_30847149_30847524	chr12	30847149	30847524	376	CAPRIN2	92198	CD14+ Monocyte	1.12852	1.40738	16.772	0.000149538	0.0164565
chr16_85291259_85292173	chr16	85291259	85292173	915	LINC00311	8302	CD14+ Monocyte	0.666653	3.52157	16.9452	0.000150202	0.0164873
chr18_70429084_70429481	chr18	70429084	70429481	398	LINC01910	44493	CD14+ Monocyte	-0.949373	1.49672	16.8261	0.00015072	0.0165231
chr14_56004701_56006019	chr14	56004701	56006019	1319	PELI2	112391	CD14+ Monocyte	-1.14862	1.65786	16.8344	0.000151125	0.0165366
chr5_83320607_83321623	chr5	83320607	83321623	1017	VCAN	150050	CD14+ Monocyte	-0.708533	3.14901	16.9328	0.000151368	0.0165366
chr14_52327192_52328017	chr14	52327192	52328017	826	PTGER2	12881	CD14+ Monocyte	0.536598	4.50909	16.919	0.000151419	0.0165366
chr4_138977267_138978157	chr4	138977267	138978157	891	NOCT	37623	CD14+ Monocyte	-0.58914	3.20234	16.9195	0.000151852	0.0165473
chr13_30737482_30738353	chr13	30737482	30738353	872	ALOX5AP	1940	CD14+ Monocyte	-0.613805	4.64822	16.9103	0.000151902	0.0165473
chr1_8348788_8350526	chr1	8348788	8350526	1739	SLC45A1	30675	CD14+ Monocyte	0.764717	2.66113	16.9099	0.000152215	0.0165605
chr19_1122894_1123710	chr19	1122894	1123710	817	SBNO2	8511	CD14+ Monocyte	0.845601	4.17134	16.8996	0.000152698	0.0165701
chr1_84450681_84451443	chr1	84450681	84451443	763	RPF1	27822	CD14+ Monocyte	-0.761186	3.01779	16.9042	0.000152881	0.0165701
chr16_67447524_67448090	chr16	67447524	67448090	567	HSD11B2	16404	CD14+ Monocyte	0.750391	2.80855	16.8859	0.000153217	0.0165856
chr19_45469020_45470573	chr19	45469020	45470573	1554	FOSB	1025	CD14+ Monocyte	0.519143	5.69028	16.8789	0.00015371	0.0166076
chr20_4462699_4463195	chr20	4462699	4463195	497	PRNP	223260	CD14+ Monocyte	0.872493	2.72012	16.8831	0.000153977	0.0166076
chr9_85743427_85743980	chr9	85743427	85743980	554	AGTPBP1	1398	CD14+ Monocyte	0.518556	4.44273	16.866	0.000154562	0.0166216
chr22_29855616_29856355	chr22	29855616	29856355	740	ASCC2	17342	CD14+ Monocyte	-0.605893	3.28987	16.872	0.000154758	0.0166216
chr4_152696780_152697524	chr4	152696780	152697524	745	TMEM154	16783	CD14+ Monocyte	-0.831159	3.98368	16.859	0.000155068	0.0166216
chr2_231227256_231228285	chr2	231227256	231228285	1030	ARMC9	28626	CD14+ Monocyte	0.788755	2.83559	16.8676	0.000155095	0.0166216
chr3_72080049_72080616	chr3	72080049	72080616	568	LINC00877	19839	CD14+ Monocyte	-0.763508	3.04537	16.8614	0.000155585	0.0166534
chr5_146473739_146474669	chr5	146473739	146474669	931	TCERG1	26407	CD14+ Monocyte	-0.974855	1.8391	16.8218	0.000155882	0.0166645
chr11_30486992_30487887	chr11	30486992	30487887	896	MPPED2	96060	CD14+ Monocyte	-0.51974	4.22615	16.837	0.000156314	0.016678
chr8_43166689_43167391	chr8	43166689	43167391	703	HGSNAT	26226	CD14+ Monocyte	-0.961493	1.49966	16.7013	0.000157029	0.0167041
chr3_127768363_127769030	chr3	127768363	127769030	668	MGLL	53852	CD14+ Monocyte	-0.763249	3.36224	16.8272	0.000157418	0.0167247
chr7_133255549_133256016	chr7	133255549	133256016	468	EXOC4	2472	CD14+ Monocyte	-0.768342	2.57283	16.8153	0.000158201	0.0167873
chr15_100394396_100395619	chr15	100394396	100395619	1224	SPATA41	43678	CD14+ Monocyte	-0.925736	2.42201	16.7909	0.000159551	0.0168364
chr4_27088260_27088996	chr4	27088260	27088996	737	LINC02261	128482	CD14+ Monocyte	-0.88526	2.59901	16.796	0.000159642	0.0168364
chr5_14574863_14575428	chr5	14574863	14575428	566	OTULINL	6363	CD14+ Monocyte	-0.759003	2.74767	16.7846	0.000160029	0.0168536
chr5_180815345_180816050	chr5	180815345	180816050	706	MGAT1	271	CD14+ Monocyte	-0.539268	4.06609	16.7688	0.000160679	0.0168837
chr13_45320831_45321801	chr13	45320831	45321801	971	TPT1	19382	CD14+ Monocyte	-0.889461	3.05578	16.756	0.000161806	0.0169349
chr17_6775596_6776763	chr17	6775596	6776763	1168	FBXO39	549	CD14+ Monocyte	2.06762	1.5	16.4152	0.00016185	0.0169349
chr1_9410056_9411306	chr1	9410056	9411306	1251	LINC02606	17610	CD14+ Monocyte	1.42163	1.4128	16.4233	0.000162101	0.0169349
chr10_124686967_124687494	chr10	124686967	124687494	528	FAM53B-AS1	16533	CD14+ Monocyte	-0.967415	2.21456	16.7414	0.000162162	0.0169349
chr1_180502149_180503533	chr1	180502149	180503533	1385	ACBD6	428	CD14+ Monocyte	0.527142	5.52365	16.7305	0.000162875	0.0169693
chr14_22819085_22819869	chr14	22819085	22819869	785	SLC7A7	78	CD14+ Monocyte	-0.789036	3.12143	16.7323	0.00016337	0.0169835
chr3_5431629_5432297	chr3	5431629	5432297	669	EDEM1	243923	CD14+ Monocyte	-1.26247	2.27562	16.7343	0.000163718	0.0169835
chr9_72585532_72586099	chr9	72585532	72586099	568	TMC1	63925	CD14+ Monocyte	-0.94013	3.05997	16.7264	0.000163801	0.0169835
chr19_19224798_19225710	chr19	19224798	19225710	913	NCAN	12841	CD14+ Monocyte	0.616212	3.46676	16.7217	0.000164051	0.0169891
chr16_55754178_55754366	chr16	55754178	55754366	189	CES1	78730	CD14+ Monocyte	-2.16285	0.765926	16.1047	0.000164874	0.0170109
chr1_112393883_112394757	chr1	112393883	112394757	875	CTTNBP2NL	1456	CD14+ Monocyte	-0.59161	4.2312	16.701	0.000164881	0.0170109
chr3_127734769_127735068	chr3	127734769	127735068	300	ABTB1	61818	CD14+ Monocyte	-1.04918	1.91296	16.6439	0.000164884	0.0170109
chr18_3051449_3052785	chr18	3051449	3052785	1337	LPIN2	38305	CD14+ Monocyte	-0.864694	2.63321	16.7119	0.000165175	0.0170109
chr13_42882973_42884279	chr13	42882973	42884279	1307	LINC00428	10229	CD14+ Monocyte	1.42643	1.30887	16.3231	0.00016525	0.0170109
chr6_134739422_134741143	chr6	134739422	134741143	1722	ALDH8A1	208958	CD14+ Monocyte	-0.979762	2.16327	16.6841	0.000166215	0.0170898
chr12_16407135_16407910	chr12	16407135	16407910	776	MGST1	53719	CD14+ Monocyte	-1.50945	1.57394	16.4527	0.000166506	0.017092
chr5_135543245_135544977	chr5	135543245	135544977	1733	CXCL14	34014	CD14+ Monocyte	0.732647	2.84276	16.6617	0.000166634	0.017092
chr16_10828741_10829586	chr16	10828741	10829586	846	TVP23A	9947	CD14+ Monocyte	-1.18174	2.11201	16.6256	0.000167184	0.0170943
chr19_41563169_41564026	chr19	41563169	41564026	858	CEACAM21	12139	CD14+ Monocyte	0.910361	3.23719	16.6424	0.000169505	0.0172508
chr7_137899218_137899745	chr7	137899218	137899745	528	CREB3L2	33243	CD14+ Monocyte	-0.607974	3.43279	16.6331	0.000169585	0.0172508
chr11_64712293_64713832	chr11	64712293	64713832	1540	NRXN2	9365	CD14+ Monocyte	0.814735	2.63999	16.6038	0.000171069	0.0173606
chr7_77467411_77467944	chr7	77467411	77467944	534	GSAP	51062	CD14+ Monocyte	-0.777093	3.30375	16.6048	0.000171667	0.0173801
chr2_12057166_12058127	chr2	12057166	12058127	962	MIR3681HG	50051	CD14+ Monocyte	-0.678181	3.24129	16.6011	0.000171866	0.0173801
chr8_37320998_37321661	chr8	37320998	37321661	664	LINC01605	172252	CD14+ Monocyte	-0.670833	3.73351	16.5894	0.000172388	0.0173999
chr1_114088374_114089419	chr1	114088374	114089419	1046	SYT6	63021	CD14+ Monocyte	1.60958	0.799606	16.1858	0.000172693	0.0173999
chr1_119858606_119860273	chr1	119858606	119860273	1668	ADAM30	36242	CD14+ Monocyte	-0.868042	2.29628	16.5828	0.000173052	0.0173999
chr5_150541725_150542556	chr5	150541725	150542556	832	NDST1	33595	CD14+ Monocyte	1.61228	1.93067	16.2955	0.000173201	0.0173999
chr2_16715984_16716646	chr2	16715984	16716646	663	GACAT3	665558	CD14+ Monocyte	-1.18809	1.30583	16.2679	0.000173275	0.0173999
chr12_7542105_7543811	chr12	7542105	7543811	1707	CD163	38287	CD14+ Monocyte	-0.656537	3.46611	16.575	0.000173562	0.0174084
chr2_239716840_239721574	chr2	239716840	239721574	4735	NDUFA10	303768	CD14+ Monocyte	1.01582	2.4143	16.4734	0.000175777	0.0175833
chr7_112124161_112124943	chr7	112124161	112124943	783	DOCK4	81456	CD14+ Monocyte	-1.1579	1.45947	16.3976	0.000175802	0.0175833
chr4_102877795_102879040	chr4	102877795	102879040	1246	CISD2	8804	CD14+ Monocyte	-1.27985	2.43808	16.5364	0.000175919	0.0175833
chr9_132365632_132366977	chr9	132365632	132366977	1346	SETX	10646	CD14+ Monocyte	-0.717954	2.8523	16.541	0.000176453	0.0176084
chr2_98748717_98749609	chr2	98748717	98749609	893	MGAT4A	17585	CD14+ Monocyte	-0.626065	4.78928	16.5215	0.000176784	0.0176084
chr18_322193_323655	chr18	322193	323655	1463	THOC1	54146	CD14+ Monocyte	-0.601379	4.2125	16.5191	0.000177041	0.0176095
chr2_47752118_47753147	chr2	47752118	47753147	1030	MSH6	29934	CD14+ Monocyte	0.501162	4.35919	16.5159	0.000177284	0.0176095
chr19_53942053_53942809	chr19	53942053	53942809	757	CACNG8	20127	CD14+ Monocyte	1.9079	0.749664	16.0283	0.000177527	0.0176095
chr20_63559290_63559953	chr20	63559290	63559953	664	FNDC11	5132	CD14+ Monocyte	1.72679	1.1095	15.9784	0.00017829	0.0176563
chr9_33715081_33715334	chr9	33715081	33715334	254	LINC01251	23082	CD14+ Monocyte	1.02021	2.53211	16.4769	0.000178789	0.0176853
chr12_92418490_92418911	chr12	92418490	92418911	422	CLLU1	2619	CD14+ Monocyte	-1.16285	1.02559	16.2515	0.000179964	0.0177811
chr3_15215647_15217231	chr3	15215647	15217231	1585	CAPN7	9402	CD14+ Monocyte	-1.10181	1.64323	16.2333	0.000180264	0.0177866
chr17_75415391_75415845	chr17	75415391	75415845	455	GRB2	9682	CD14+ Monocyte	1.17944	1.11367	15.9945	0.000180433	0.0177866
chr9_68952030_68952847	chr9	68952030	68952847	818	FXN	82904	CD14+ Monocyte	-0.646994	3.21247	16.4624	0.000181435	0.0178514
chr19_55433779_55435857	chr19	55433779	55435857	2079	SHISA7	7006	CD14+ Monocyte	1.22697	1.59831	16.2192	0.000181505	0.0178514
chr4_148375735_148376468	chr4	148375735	148376468	734	NR3C2	65946	CD14+ Monocyte	-1.56959	0.793159	16.0147	0.000183402	0.0180174
chr14_34839149_34839708	chr14	34839149	34839708	560	BAZ1A	35652	CD14+ Monocyte	1.60674	0.825109	15.8928	0.000183785	0.0180344
chr15_76190475_76191606	chr15	76190475	76191606	1132	ETFA	119863	CD14+ Monocyte	0.667935	2.93694	16.4183	0.000184857	0.0180911
chr16_15998145_15998879	chr16	15998145	15998879	735	ABCC1	48530	CD14+ Monocyte	-0.835992	2.82304	16.4162	0.000184993	0.0180911
chr19_47446918_47448172	chr19	47446918	47448172	1255	SLC8A2	23721	CD14+ Monocyte	0.940104	3.19834	16.4031	0.000185219	0.0180926
chr11_8331951_8332663	chr11	8331951	8332663	713	RIC3	162926	CD14+ Monocyte	-0.728753	3.62573	16.4027	0.000185565	0.0181059
chr6_36622110_36622783	chr6	36622110	36622783	674	SRSF3	27749	CD14+ Monocyte	-0.856636	2.85098	16.4037	0.000186143	0.0181417
chr1_181123983_181124973	chr1	181123983	181124973	991	IER5	35284	CD14+ Monocyte	-0.733481	3.96362	16.3829	0.000186894	0.0181449
chr1_245690119_245690784	chr1	245690119	245690784	666	SMYD3	297767	CD14+ Monocyte	-1.4787	1.31727	16.2446	0.000186924	0.0181449
chr16_88882007_88882841	chr16	88882007	88882841	835	PABPN1L	11855	CD14+ Monocyte	1.34357	1.74929	16.3011	0.000186989	0.0181449
chr1_16216109_16216677	chr1	16216109	16216677	569	ARHGEF19	3457	CD14+ Monocyte	0.899366	3.25568	16.3851	0.000187297	0.0181449
chr11_115705325_115705570	chr11	115705325	115705570	246	LINC00900	54630	CD14+ Monocyte	-1.09152	1.65343	16.2346	0.000187385	0.0181449
chr7_81839704_81840499	chr7	81839704	81840499	796	HGF	69657	CD14+ Monocyte	-1.05696	1.47174	16.3026	0.000187505	0.0181449
chr4_25928472_25929544	chr4	25928472	25929544	1073	SMIM20	14281	CD14+ Monocyte	-0.649502	3.15918	16.3792	0.000187653	0.0181449
chr1_84388640_84389622	chr1	84388640	84389622	983	DNASE2B	8861	CD14+ Monocyte	-0.762207	2.35308	16.3738	0.000188183	0.0181758
chrX_148416064_148416857	chrX	148416064	148416857	794	AFF2	83759	CD14+ Monocyte	-1.25069	1.64738	16.2587	0.000189057	0.0182397
chr2_26503127_26504039	chr2	26503127	26504039	913	OTOF	25003	CD14+ Monocyte	0.771451	4.14844	16.3286	0.0001909	0.0183559
chr19_44606819_44607416	chr19	44606819	44607416	598	IGSF23	6146	CD14+ Monocyte	-1.43227	1.36196	16.0542	0.000191364	0.0183799
chr11_61028398_61028708	chr11	61028398	61028708	311	CD6	56719	CD14+ Monocyte	-1.26418	1.4771	16.0791	0.000191961	0.01841
chr3_51242291_51243247	chr3	51242291	51243247	957	MANF	142043	CD14+ Monocyte	-1.4445	0.845848	15.9059	0.000192105	0.01841
chr17_4498287_4500335	chr17	4498287	4500335	2049	SPNS2	593	CD14+ Monocyte	0.527848	3.97809	16.2967	0.000193382	0.0184912
chr10_84430037_84430345	chr10	84430037	84430345	309	CCSER2	4869	CD14+ Monocyte	1.67151	0.640786	15.853	0.000194865	0.0186028
chr6_148674067_148674753	chr6	148674067	148674753	687	UST	72276	CD14+ Monocyte	-0.876145	1.80344	16.2285	0.000195409	0.0186028
chr4_81606546_81607430	chr4	81606546	81607430	885	RASGEF1B	134639	CD14+ Monocyte	-0.717524	2.61567	16.2768	0.000195414	0.0186028
chr18_39799200_39800691	chr18	39799200	39800691	1492	LINC01902	41017	CD14+ Monocyte	1.27983	1.40328	15.9936	0.000198263	0.0188116
chr8_42217036_42217657	chr8	42217036	42217657	622	PLAT	9471	CD14+ Monocyte	-0.816521	2.27957	16.2311	0.000198513	0.0188146
chr14_91427046_91427797	chr14	91427046	91427797	752	CCDC88C	9226	CD14+ Monocyte	0.951609	1.96286	16.1476	0.000199332	0.0188714
chr6_167090199_167090491	chr6	167090199	167090491	293	CCR6	21315	CD14+ Monocyte	-0.788834	2.23924	16.2192	0.000199703	0.0188832
chrX_24428443_24428976	chrX	24428443	24428976	534	PDK3	36309	CD14+ Monocyte	-1.11194	0.952138	15.8935	0.000200115	0.0188832
chr8_39037868_39038560	chr8	39037868	39038560	693	ADAM9	40883	CD14+ Monocyte	-0.756088	3.28192	16.2012	0.000201098	0.0189552
chr8_102600521_102601825	chr8	102600521	102601825	1305	ODF1	48933	CD14+ Monocyte	-0.530074	4.18266	16.1813	0.000202196	0.0190171
chr1_17673548_17677117	chr1	17673548	17677117	3570	ARHGEF10L	55236	CD14+ Monocyte	0.661605	4.3931	16.1539	0.000204447	0.0191868
chr11_115941175_115942186	chr11	115941175	115942186	1012	LINC00900	180975	CD14+ Monocyte	-1.14934	3.19007	16.1591	0.000204857	0.0191909
chr9_21833110_21833937	chr9	21833110	21833937	828	MTAP	30475	CD14+ Monocyte	0.667	4.21163	16.1452	0.000205126	0.0191909
chr8_23552698_23553161	chr8	23552698	23553161	464	SLC25A37	23743	CD14+ Monocyte	-0.96996	2.14881	16.0939	0.000205853	0.019214
chr19_54654426_54655381	chr19	54654426	54655381	956	LILRB4	7437	CD14+ Monocyte	1.12066	2.63882	16.1165	0.00020664	0.0192665
chr4_101458555_101459462	chr4	101458555	101459462	908	PPP3CA	111029	CD14+ Monocyte	-1.18275	2.06164	16.0784	0.000207355	0.0192914
chr17_41500143_41500370	chr17	41500143	41500370	228	KRT13	5242	CD14+ Monocyte	-1.25056	2.10777	16.1002	0.000207666	0.0192995
chr4_139414792_139415236	chr4	139414792	139415236	445	RAB33B	38884	CD14+ Monocyte	1.27601	1.05107	15.7811	0.000208599	0.0193653
chrX_53356109_53358435	chrX	53356109	53358435	2327	IQSEC2	34759	CD14+ Monocyte	0.669852	3.10529	16.0662	0.000212259	0.0196167
chr2_207513513_207514416	chr2	207513513	207514416	904	CREB1	15545	CD14+ Monocyte	-1.15025	1.82728	15.9806	0.000212265	0.0196167
chr9_137461648_137462186	chr9	137461648	137462186	539	NSMF	2314	CD14+ Monocyte	1.11825	4.20705	16.0588	0.0002124	0.0196167
chr8_128173419_128174560	chr8	128173419	128174560	1142	PVT1	378887	CD14+ Monocyte	-0.611814	3.69238	16.0571	0.000212667	0.0196167
chrX_131740948_131742282	chrX	131740948	131742282	1335	FIRRE	88361	CD14+ Monocyte	0.602713	3.20104	15.2879	0.000212913	0.0196167
chr3_117553243_117553836	chr3	117553243	117553836	594	LINC02024	137089	CD14+ Monocyte	-0.757323	2.92524	16.0582	0.000213122	0.0196167
chr17_76397770_76398826	chr17	76397770	76398826	1057	SPHK1	12493	CD14+ Monocyte	0.542345	3.27805	16.055	0.00021313	0.0196167
chr5_139775016_139776051	chr5	139775016	139776051	1036	PSD2	19756	CD14+ Monocyte	0.567617	5.3796	16.0297	0.000214539	0.0196515
chr11_123083520_123084192	chr11	123083520	123084192	673	HSPA8	21384	CD14+ Monocyte	-0.932621	2.48865	16.0419	0.0002146	0.0196515
chr22_28441935_28443226	chr22	28441935	28443226	1292	TTC28	236639	CD14+ Monocyte	0.607391	3.07052	16.0418	0.000214651	0.0196515
chr3_13189413_13190326	chr3	13189413	13190326	914	IQSEC1	92931	CD14+ Monocyte	0.928358	3.77002	16.0309	0.000214897	0.0196531
chr14_59849235_59850442	chr14	59849235	59850442	1208	RTN1	20334	CD14+ Monocyte	-0.754151	3.69206	16.0175	0.000215871	0.0197213
chr3_34364277_34364820	chr3	34364277	34364820	544	PDCD6IP	565648	CD14+ Monocyte	-0.971327	2.1109	16.0008	0.000216292	0.0197388
chr2_137959940_137960669	chr2	137959940	137960669	730	HNMT	3803	CD14+ Monocyte	-0.76238	2.72883	16.0123	0.00021725	0.0198016
chr2_26499660_26499878	chr2	26499660	26499878	219	OTOF	21536	CD14+ Monocyte	2.67717	1.40609	15.7176	0.000217901	0.0198016
chr17_68318256_68319864	chr17	68318256	68319864	1609	ARSG	26122	CD14+ Monocyte	-0.585053	4.2854	15.9852	0.000218513	0.0198363
chr2_42763783_42764647	chr2	42763783	42764647	865	OXER1	386	CD14+ Monocyte	-0.670308	2.9333	15.9808	0.000219523	0.0198884
chr1_2049548_2050962	chr1	2049548	2050962	1415	PRKCZ	552	CD14+ Monocyte	0.971133	2.48491	15.9581	0.000219549	0.0198884
chr19_8525373_8526509	chr19	8525373	8526509	1137	ZNF414	11206	CD14+ Monocyte	0.700001	3.96713	15.9613	0.00022077	0.0199779
chr18_58937203_58938074	chr18	58937203	58938074	872	ZNF532	72327	CD14+ Monocyte	-1.26552	1.53805	15.8073	0.000221643	0.0200359
chr1_114122572_114123423	chr1	114122572	114123423	852	SYT6	29017	CD14+ Monocyte	-1.56815	1.40403	15.6328	0.000222029	0.0200428
chr8_47632763_47633597	chr8	47632763	47633597	835	SPIDR	20490	CD14+ Monocyte	-1.01023	1.92713	15.9012	0.000222185	0.0200428
chr8_29626783_29627934	chr8	29626783	29627934	1152	LINC02099	120374	CD14+ Monocyte	-0.951121	1.66785	15.8852	0.00022301	0.0200961
chr5_76952928_76954686	chr5	76952928	76954686	1759	CRHBP	116	CD14+ Monocyte	1.27879	1.85437	15.6849	0.000223636	0.0201104
chr2_207505810_207506079	chr2	207505810	207506079	270	CREB1	23882	CD14+ Monocyte	-0.873538	2.34268	15.9218	0.000224285	0.0201276
chr4_145481271_145483266	chr4	145481271	145483266	1996	SMAD1	34	CD14+ Monocyte	0.555873	4.18449	15.9208	0.000224295	0.0201276
chr3_69648991_69649592	chr3	69648991	69649592	602	MITF	89871	CD14+ Monocyte	-1.2321	0.797095	15.5213	0.000224545	0.020129
chr16_29877220_29878088	chr16	29877220	29878088	869	CDIPT	13994	CD14+ Monocyte	0.700542	4.34775	15.9121	0.00022495	0.0201444
chr22_37806601_37806905	chr22	37806601	37806905	305	GCAT	999	CD14+ Monocyte	0.862481	1.59628	15.6409	0.000225225	0.0201481
chr1_183804700_183805787	chr1	183804700	183805787	1088	RGL1	419	CD14+ Monocyte	0.634778	3.2233	15.9048	0.00022636	0.0202075
chr18_63271612_63272384	chr18	63271612	63272384	773	BCL2	47385	CD14+ Monocyte	-0.74727	2.25096	15.8864	0.000227501	0.0202883
chr5_138486660_138487305	chr5	138486660	138487305	646	EGR1	21182	CD14+ Monocyte	-1.30197	1.64796	15.6931	0.000228622	0.0203332
chr8_27368641_27369280	chr8	27368641	27369280	640	PTK2B	43078	CD14+ Monocyte	-0.802779	3.10065	15.8797	0.000228866	0.0203332
chr14_23056076_23056768	chr14	23056076	23056768	693	CDH24	770	CD14+ Monocyte	0.604827	3.2076	15.8759	0.000228961	0.0203332
chr15_52445290_52446482	chr15	52445290	52446482	1193	MYO5A	82398	CD14+ Monocyte	-1.17832	1.52221	15.7496	0.000229155	0.0203332
chr4_12122487_12122746	chr4	12122487	12122746	260	HS3ST1	693593	CD14+ Monocyte	-1.25034	1.55351	15.7474	0.000229348	0.0203332
chr18_49561079_49562310	chr18	49561079	49562310	1232	LIPG	254	CD14+ Monocyte	1.27272	0.869926	15.503	0.000229421	0.0203332
chr3_151322506_151322851	chr3	151322506	151322851	346	GPR87	5686	CD14+ Monocyte	-0.962965	1.2265	15.6476	0.000229756	0.020342
chr17_67200656_67201124	chr17	67200656	67201124	469	HELZ	44072	CD14+ Monocyte	1.39279	0.569577	15.3811	0.000230216	0.0203444
chr14_89447296_89448073	chr14	89447296	89448073	778	FOXN3-AS1	29943	CD14+ Monocyte	-0.649673	3.58413	15.8565	0.000230257	0.0203444
chr7_2664944_2665340	chr7	2664944	2665340	397	AMZ1	14181	CD14+ Monocyte	1.04852	1.45064	15.6573	0.000231606	0.0204063
chr10_123402486_123403157	chr10	123402486	123403157	672	BUB3	248085	CD14+ Monocyte	-1.09575	1.31407	15.7475	0.000231669	0.0204063
chr15_40330518_40330725	chr15	40330518	40330725	208	INAFM2	6827	CD14+ Monocyte	-1.47033	1.57304	15.5156	0.000232019	0.0204162
chr7_25894978_25895810	chr7	25894978	25895810	833	NFE2L3	256387	CD14+ Monocyte	-0.60781	4.133	15.8267	0.000232694	0.0204547
chr10_120789370_120790480	chr10	120789370	120790480	1111	WDR11-AS1	60699	CD14+ Monocyte	-0.650224	3.23122	15.8147	0.000234367	0.0205598
chr11_118869958_118871039	chr11	118869958	118871039	1082	CXCR5	12852	CD14+ Monocyte	0.816494	4.63957	15.8023	0.000234886	0.0205733
chr2_84832729_84833447	chr2	84832729	84833447	719	TRABD2A	47637	CD14+ Monocyte	-0.598023	3.52679	15.8036	0.000235172	0.0205733
chr3_71494125_71494736	chr3	71494125	71494736	612	FOXP1	48821	CD14+ Monocyte	-1.11067	1.60451	15.6252	0.000235451	0.0205733
chr8_81290871_81291736	chr8	81290871	81291736	866	FABP5	10336	CD14+ Monocyte	-0.768386	2.21905	15.8045	0.000235477	0.0205733
chr8_117329930_117330547	chr8	117329930	117330547	618	MED30	190165	CD14+ Monocyte	1.42617	0.563153	15.3529	0.000236172	0.020613
chr9_107932134_107932528	chr9	107932134	107932528	395	KLF4	442365	CD14+ Monocyte	-0.843618	2.17099	15.7792	0.000237757	0.020709
chr19_53889670_53890452	chr19	53889670	53890452	783	PRKCG	7474	CD14+ Monocyte	0.612565	3.81479	15.774	0.000237933	0.020709
chr1_185673916_185674624	chr1	185673916	185674624	709	LINC01350	45428	CD14+ Monocyte	-1.02573	1.69877	15.7194	0.000238219	0.020709
chr8_81227218_81228000	chr8	81227218	81228000	783	FABP5	52535	CD14+ Monocyte	-1.45427	1.33944	15.4501	0.000238234	0.020709
chr15_79953769_79955115	chr15	79953769	79955115	1347	BCL2A1	16081	CD14+ Monocyte	-0.500859	4.03999	15.7562	0.000239477	0.0207581
chr19_2631457_2631945	chr19	2631457	2631945	489	GNG7	70749	CD14+ Monocyte	0.83309	2.52721	15.7108	0.000240006	0.0207791
chr12_49513874_49514491	chr12	49513874	49514491	618	KCNH3	24538	CD14+ Monocyte	0.93995	1.81277	15.6799	0.000240503	0.0207803
chr2_180523389_180524283	chr2	180523389	180524283	895	SCHLAP1	167820	CD14+ Monocyte	-0.821705	2.41404	15.7367	0.000240961	0.020799
chr1_87830437_87830837	chr1	87830437	87830837	401	LINC01364	458782	CD14+ Monocyte	-1.07271	1.65493	15.6602	0.000241626	0.0208146
chr11_12673851_12675060	chr11	12673851	12675060	1210	TEAD1	569	CD14+ Monocyte	0.627462	3.58179	15.7342	0.000241962	0.0208228
chr1_221100642_221100848	chr1	221100642	221100848	207	HLX-AS1	220502	CD14+ Monocyte	-0.749149	2.50906	15.7086	0.000244776	0.0210126
chr5_135999133_135999990	chr5	135999133	135999990	858	TGFBI	28997	CD14+ Monocyte	-0.633062	4.14686	15.6979	0.0002449	0.0210126
chr8_17264672_17265914	chr8	17264672	17265914	1243	VPS37A	17715	CD14+ Monocyte	-0.825744	2.83375	15.6979	0.000246163	0.0210966
chr11_2089420_2089926	chr11	2089420	2089926	507	H19	87954	CD14+ Monocyte	1.27027	1.41275	15.5068	0.000246513	0.0210966
chr10_12333272_12334301	chr10	12333272	12334301	1030	CAMK1D	15245	CD14+ Monocyte	-0.650916	4.40304	15.6788	0.000246733	0.0210966
chr7_143331220_143332100	chr7	143331220	143332100	881	CLCN1	15110	CD14+ Monocyte	-0.937594	1.76485	15.6284	0.000247554	0.021135
chr14_56395030_56395416	chr14	56395030	56395416	387	TMEM260	184381	CD14+ Monocyte	-1.32589	0.835672	15.3124	0.000248367	0.021163
chr15_80776459_80777624	chr15	80776459	80777624	1166	CEMIP	1745	CD14+ Monocyte	0.834289	3.25456	15.6717	0.000248375	0.021163
chr2_9230799_9231749	chr2	9230799	9231749	951	ASAP2	23988	CD14+ Monocyte	-0.591768	3.47219	15.6638	0.000248724	0.0211718
chr19_11535761_11536463	chr19	11535761	11536463	703	CNN1	2387	CD14+ Monocyte	0.547913	3.90528	15.6502	0.000250033	0.0212379
chr18_58887013_58888052	chr18	58887013	58888052	1040	ZNF532	22137	CD14+ Monocyte	-0.606898	3.62135	15.6473	0.000250241	0.0212379
chr16_57984524_57985650	chr16	57984524	57985650	1127	TEPP	7981	CD14+ Monocyte	0.564812	4.57319	15.632	0.000251305	0.0212772
chr2_71465121_71465814	chr2	71465121	71465814	694	DYSF	884	CD14+ Monocyte	1.7736	1.85035	15.3072	0.000251342	0.0212772
chr21_44793081_44793902	chr21	44793081	44793902	822	UBE2G2	7918	CD14+ Monocyte	0.799017	2.21466	15.6125	0.000251445	0.0212772
chr5_176609244_176610556	chr5	176609244	176610556	1313	GPRIN1	400	CD14+ Monocyte	0.842675	2.90677	15.6322	0.000252379	0.0213021
chr4_142961225_142962376	chr4	142961225	142962376	1152	INPP4B	114690	CD14+ Monocyte	-0.677834	3.62071	15.6239	0.000252483	0.0213021
chr17_81183048_81184972	chr17	81183048	81184972	1925	AATK	16827	CD14+ Monocyte	1.3412	1.16117	15.2748	0.000253895	0.0213807
chr3_159929232_159930189	chr3	159929232	159930189	958	IL12A	58645	CD14+ Monocyte	-0.505217	5.3115	15.6051	0.000253961	0.0213807
chr2_27756426_27757426	chr2	27756426	27757426	1001	MRPL33	14290	CD14+ Monocyte	-0.694572	3.25328	15.595	0.000255904	0.0214855
chr10_124522997_124524180	chr10	124522997	124524180	1184	LHPP	61175	CD14+ Monocyte	-0.585895	3.81129	15.5852	0.000256416	0.0214932
chr8_143017957_143019641	chr8	143017957	143019641	1685	LY6E-DT	433	CD14+ Monocyte	0.735237	3.42058	15.5872	0.000256738	0.0214932
chr14_100680477_100681131	chr14	100680477	100681131	655	LINC00523	23210	CD14+ Monocyte	1.1263	1.94195	15.5369	0.000256746	0.0214932
chr7_25116669_25118654	chr7	25116669	25118654	1986	CYCS	6606	CD14+ Monocyte	1.09743	2.43946	15.5178	0.000257914	0.02157
chr4_14876996_14878072	chr4	14876996	14878072	1077	LINC00504	10097	CD14+ Monocyte	-0.619437	3.81118	15.5514	0.000259756	0.0216126
chr21_34222955_34224151	chr21	34222955	34224151	1197	LINC00310	42279	CD14+ Monocyte	-0.944811	2.28148	15.5459	0.000260405	0.0216126
chr10_127889192_127890740	chr10	127889192	127890740	1549	CLRN3	2201	CD14+ Monocyte	-0.793766	3.04735	15.5529	0.00026044	0.0216126
chr19_19187421_19187635	chr19	19187421	19187635	215	BORCS8	4517	CD14+ Monocyte	1.94741	1.67321	15.2343	0.000260597	0.0216126
chr19_45670684_45671382	chr19	45670684	45671382	699	GIPR	2464	CD14+ Monocyte	0.775232	4.00576	15.5403	0.00026118	0.0216126
chr21_14879431_14880504	chr21	14879431	14880504	1074	LINC02246	38164	CD14+ Monocyte	-0.870757	2.61818	15.5324	0.000262158	0.0216126
chr21_41410730_41412130	chr21	41410730	41412130	1401	MX1	8427	CD14+ Monocyte	1.34595	2.79033	15.4842	0.00026217	0.0216126
chr2_218731558_218731917	chr2	218731558	218731917	360	TTLL4	20724	CD14+ Monocyte	-0.776889	3.27982	15.5351	0.000262178	0.0216126
chr22_31293624_31293989	chr22	31293624	31293989	366	PIK3IP1	1090	CD14+ Monocyte	-0.775191	2.93443	15.5146	0.000264069	0.021726
chr5_57242940_57243974	chr5	57242940	57243974	1035	GPBP1	28867	CD14+ Monocyte	1.14644	2.30406	15.4201	0.00026407	0.021726
chr4_161650708_161651795	chr4	161650708	161651795	1088	FSTL5	512205	CD14+ Monocyte	-0.594926	3.10033	15.5048	0.000265318	0.0217869
chr22_38843152_38844558	chr22	38843152	38844558	1407	NPTXR	530	CD14+ Monocyte	0.635836	3.39224	15.499	0.000265923	0.0218148
chr3_112931585_112932457	chr3	112931585	112932457	873	CD200R1	42646	CD14+ Monocyte	-1.06471	1.29456	15.3239	0.000267303	0.0218665
chr8_125352700_125353484	chr8	125352700	125353484	785	TRIB1	76873	CD14+ Monocyte	-0.726794	2.45497	15.4841	0.000267652	0.0218742
chrX_67780289_67781612	chrX	67780289	67781612	1324	AR	235667	CD14+ Monocyte	-0.677987	3.30707	15.4527	0.00027062	0.0220791
chr1_239914856_239915359	chr1	239914856	239915359	504	CHRM3-AS2	195737	CD14+ Monocyte	-1.11275	1.85225	15.4239	0.000270671	0.0220791
chr10_16966681_16967484	chr10	16966681	16967484	804	RSU1	149227	CD14+ Monocyte	-1.2043	2.18044	15.4118	0.000271656	0.022134
chr4_87843799_87844362	chr4	87843799	87844362	564	SPP1	131287	CD14+ Monocyte	-0.728511	4.10461	15.4327	0.000272225	0.022134
chr10_88851611_88852099	chr10	88851611	88852099	489	ANKRD22	233	CD14+ Monocyte	-0.644089	3.77574	15.435	0.000272345	0.022134
chr16_4263483_4264178	chr16	4263483	4264178	696	TFAP4	8845	CD14+ Monocyte	1.33502	1.47489	15.2766	0.000272581	0.022134
chr12_3299797_3300953	chr12	3299797	3300953	1157	PRMT8	80395	CD14+ Monocyte	0.621281	3.7245	15.4322	0.00027263	0.022134
chr10_100006230_100006824	chr10	100006230	100006824	595	DNMBP	3123	CD14+ Monocyte	-1.29351	3.32585	15.4263	0.000273847	0.0221417
chr11_60377471_60379124	chr11	60377471	60379124	1654	MS4A7	593	CD14+ Monocyte	-0.565533	5.40879	15.4163	0.000273858	0.0221417
chr9_123912511_123912978	chr9	123912511	123912978	468	DENND1A	17148	CD14+ Monocyte	-1.35805	0.753569	14.8912	0.000274047	0.0221417
chr1_192926390_192927254	chr1	192926390	192927254	865	RGS2	117352	CD14+ Monocyte	-1.15853	1.87714	15.3748	0.000274269	0.0221417
chr10_27242846_27243328	chr10	27242846	27243328	483	ACBD5	735	CD14+ Monocyte	-0.930801	3.54724	15.3989	0.000276577	0.0223025
chr20_53926322_53927151	chr20	53926322	53927151	830	BCAS1	131869	CD14+ Monocyte	-0.837518	3.64389	15.3947	0.000276791	0.0223025
chr14_71290844_71291699	chr14	71290844	71291699	856	SIPA1L1	28776	CD14+ Monocyte	-0.67638	3.41604	15.3934	0.000277039	0.0223025
chr12_119988552_119990329	chr12	119988552	119990329	1778	BICDL1	486	CD14+ Monocyte	0.613094	3.30851	15.3889	0.000277797	0.022322
chr10_13712498_13713700	chr10	13712498	13713700	1203	FRMD4A	4931	CD14+ Monocyte	-0.637371	3.84863	15.3816	0.000278051	0.022322
chr2_36705684_36706729	chr2	36705684	36706729	1046	VIT	8978	CD14+ Monocyte	-0.94699	1.84307	15.2928	0.000278589	0.022322
chr19_42185288_42185960	chr19	42185288	42185960	673	DEDD2	31717	CD14+ Monocyte	-0.623294	2.9595	15.378	0.000279077	0.022322
chr8_121382506_121383315	chr8	121382506	121383315	810	HAS2-AS1	256030	CD14+ Monocyte	-0.990815	2.04489	15.3632	0.000279096	0.022322
chr8_125191541_125192275	chr8	125191541	125192275	735	NSMCE2	99682	CD14+ Monocyte	-0.706036	3.54118	15.3697	0.000279578	0.0223398
chr10_103644872_103645825	chr10	103644872	103645825	954	SH3PXD2A	32390	CD14+ Monocyte	-0.520881	4.31628	15.3571	0.000280527	0.0223948
chr2_22280957_22281645	chr2	22280957	22281645	689	KLHL29	1103533	CD14+ Monocyte	-1.05781	2.67464	15.3616	0.000281327	0.0224177
chr21_45973202_45975363	chr21	45973202	45975363	2162	COL6A1	6406	CD14+ Monocyte	1.11378	2.45426	15.283	0.000281341	0.0224177
chr14_74922572_74923589	chr14	74922572	74923589	1018	RPS6KL1	130	CD14+ Monocyte	0.564593	3.30927	15.3526	0.000281784	0.0224177
chr3_30578235_30579163	chr3	30578235	30579163	929	TGFBR2	27338	CD14+ Monocyte	-0.616888	4.30644	15.3431	0.000282083	0.0224177
chr6_37039233_37040370	chr6	37039233	37040370	1138	FGD2	33579	CD14+ Monocyte	0.715066	3.61854	15.3444	0.000282116	0.0224177
chrX_45069843_45071050	chrX	45069843	45071050	1208	DIPK2B	129826	CD14+ Monocyte	0.889707	1.59943	15.1394	0.000284174	0.0225398
chr3_117063551_117064605	chr3	117063551	117064605	1055	LSAMP	618064	CD14+ Monocyte	-0.722261	2.95505	15.3363	0.000284177	0.0225398
chr2_7071183_7072479	chr2	7071183	7072479	1297	RNF144A	138100	CD14+ Monocyte	0.570159	4.25156	15.3166	0.000285268	0.0225666
chr8_144412851_144413904	chr8	144412851	144413904	1054	SLC39A4	319	CD14+ Monocyte	0.590167	5.39622	15.314	0.000285301	0.0225666
chr15_58232103_58232810	chr15	58232103	58232810	708	AQP9	93723	CD14+ Monocyte	-1.01978	2.00717	15.2773	0.000285623	0.0225713
chr12_64638470_64639314	chr12	64638470	64639314	845	RASSF3	27976	CD14+ Monocyte	-0.625083	2.83584	15.318	0.00028639	0.022578
chr21_45438969_45439844	chr21	45438969	45439844	876	COL18A1	15677	CD14+ Monocyte	0.590613	4.51286	15.2884	0.000288351	0.0226827
chr5_36655113_36655605	chr5	36655113	36655605	493	SLC1A3	48508	CD14+ Monocyte	-0.771641	2.95198	15.2898	0.000289572	0.022758
chr12_108689932_108690254	chr12	108689932	108690254	323	CORO1C	12744	CD14+ Monocyte	-0.82934	2.58359	15.2591	0.000290744	0.0227962
chr6_14764981_14766623	chr6	14764981	14766623	1643	JARID2	479445	CD14+ Monocyte	-0.796142	2.89631	15.2766	0.00029096	0.0227962
chrX_17527093_17528769	chrX	17527093	17528769	1677	NHS	106730	CD14+ Monocyte	-0.58784	3.47733	15.2703	0.000291017	0.0227962
chr15_75233285_75235826	chr15	75233285	75235826	2542	C15orf39	31404	CD14+ Monocyte	1.01457	2.4278	15.2006	0.000291912	0.0227962
chr7_139104189_139105263	chr7	139104189	139105263	1075	ZC3HAV1	4457	CD14+ Monocyte	0.591526	3.08341	15.2482	0.000294093	0.0228824
chr4_167221771_167222419	chr4	167221771	167222419	649	SPOCK3	12007	CD14+ Monocyte	-0.792151	2.54362	15.2526	0.000294346	0.0228824
chr2_42092057_42092733	chr2	42092057	42092733	677	PKDCC	44037	CD14+ Monocyte	-0.916115	2.40026	15.2398	0.000295344	0.0229393
chr19_14450147_14450982	chr19	14450147	14450982	836	PKN1	9871	CD14+ Monocyte	0.947294	3.13623	15.2254	0.000296098	0.0229771
chr2_55227847_55228293	chr2	55227847	55228293	447	RPS27A	3609	CD14+ Monocyte	-0.725541	2.88765	15.2291	0.000296501	0.0229876
chr6_2725998_2726846	chr6	2725998	2726846	849	MYLK4	24076	CD14+ Monocyte	-0.554973	3.81342	15.2096	0.000297844	0.0230424
chr12_49982306_49983046	chr12	49982306	49983046	741	AQP6	9360	CD14+ Monocyte	-0.547216	2.91138	15.2153	0.000298011	0.0230424
chr19_16399101_16400077	chr19	16399101	16400077	977	EPS15L1	71893	CD14+ Monocyte	0.550438	3.98612	15.2047	0.000298563	0.0230644
chr3_55620184_55620767	chr3	55620184	55620767	584	ERC2-IT1	38702	CD14+ Monocyte	-0.729489	3.15066	15.2046	0.000299097	0.023085
chr10_29751036_29752281	chr10	29751036	29752281	1246	SVIL	14100	CD14+ Monocyte	-0.903139	2.45494	15.1937	0.000300129	0.0231201
chr11_116691797_116692272	chr11	116691797	116692272	476	BUD13	80715	CD14+ Monocyte	1.34605	0.962407	14.8776	0.000300279	0.0231201
chr1_15994166_15995116	chr1	15994166	15995116	951	SRARP	9119	CD14+ Monocyte	0.881895	2.30038	15.1564	0.000301003	0.0231201
chr1_230509381_230510235	chr1	230509381	230510235	855	PGBD5	83049	CD14+ Monocyte	-1.15657	3.38437	15.1884	0.000301096	0.0231201
chr2_195595707_195596482	chr2	195595707	195596482	776	SLC39A10	60475	CD14+ Monocyte	-0.939268	1.59475	15.154	0.000301164	0.0231201
chr1_59743084_59744217	chr1	59743084	59744217	1134	HOOK1	70731	CD14+ Monocyte	-0.604583	3.27587	15.1815	0.000302007	0.0231343
chr2_99898104_99898931	chr2	99898104	99898931	828	AFF3	206652	CD14+ Monocyte	-0.993565	1.37448	15.0639	0.000302665	0.0231386
chr14_93549704_93550868	chr14	93549704	93550868	1165	UNC79	118766	CD14+ Monocyte	-1.10544	1.67424	15.1029	0.000302781	0.0231386
chr15_25905165_25905679	chr15	25905165	25905679	515	LINC02346	2806	CD14+ Monocyte	1.18941	0.960679	14.8322	0.000304808	0.0232167
chrX_131734372_131735261	chrX	131734372	131735261	890	FIRRE	95382	CD14+ Monocyte	0.744904	1.41379	14.3835	0.000304964	0.0232167
chr20_20248622_20249438	chr20	20248622	20249438	817	INSM1	118665	CD14+ Monocyte	-0.816422	2.28932	15.1363	0.000307114	0.0232192
chr7_74417166_74418001	chr7	74417166	74418001	836	GTF2IRD1	35904	CD14+ Monocyte	0.703758	2.6407	15.1356	0.000307314	0.0232192
chr3_184825200_184825938	chr3	184825200	184825938	739	VPS8	12694	CD14+ Monocyte	1.50783	1.19302	14.8768	0.000307636	0.0232192
chr2_9168288_9170090	chr2	9168288	9170090	1803	ASAP2	36674	CD14+ Monocyte	-0.596633	3.5186	15.1301	0.000307852	0.0232192
chr22_18147331_18147558	chr22	18147331	18147558	228	USP18	2611	CD14+ Monocyte	1.56178	1.13539	14.8473	0.000308879	0.0232226
chr2_37154955_37155201	chr2	37154955	37155201	247	EIF2AK2	1779	CD14+ Monocyte	1.52949	0.978586	14.7252	0.000308917	0.0232226
chr7_132445826_132446909	chr7	132445826	132446909	1084	PLXNA4	129561	CD14+ Monocyte	-0.89074	3.5898	15.1203	0.000308976	0.0232226
chr19_47416945_47419121	chr19	47416945	47419121	2177	MEIS3	406	CD14+ Monocyte	1.07804	2.13375	15.0067	0.000310118	0.0232666
chr4_82223490_82224350	chr4	82223490	82224350	861	HNRNPD	149641	CD14+ Monocyte	-0.551255	3.42361	15.1094	0.000310412	0.0232666
chr21_33036213_33037065	chr21	33036213	33037065	853	OLIG2	10279	CD14+ Monocyte	-0.714223	4.12561	15.1051	0.000310643	0.0232666
chr10_6148391_6148744	chr10	6148391	6148744	354	PFKFB3	2144	CD14+ Monocyte	-0.838019	3.06064	15.104	0.000311145	0.0232822
chr13_28467116_28467415	chr13	28467116	28467415	300	FLT1	27713	CD14+ Monocyte	-0.975304	2.06395	15.0333	0.000311393	0.0232822
chr6_108837408_108838144	chr6	108837408	108838144	737	ARMC2	10271	CD14+ Monocyte	-0.573375	3.16379	15.0965	0.000312642	0.02332
chr3_53354942_53355457	chr3	53354942	53355457	516	DCP1A	7399	CD14+ Monocyte	-1.33638	0.957748	14.5398	0.000312881	0.02332
chr20_420730_421254	chr20	420730	421254	525	RBCK1	12432	CD14+ Monocyte	1.28751	1.40712	14.8333	0.000313456	0.02332
chr3_40762404_40763381	chr3	40762404	40763381	978	ZNF621	237445	CD14+ Monocyte	-0.654165	2.68725	15.0889	0.000313524	0.02332
chr3_152335045_152336020	chr3	152335045	152336020	976	MBNL1	36032	CD14+ Monocyte	-1.09765	1.19342	14.752	0.000313888	0.0233269
chr18_13450603_13452652	chr18	13450603	13452652	2050	LDLRAD4-AS1	23069	CD14+ Monocyte	-0.696648	3.47737	15.075	0.000314702	0.0233426
chr1_46488522_46490226	chr1	46488522	46490226	1705	DMBX1	391	CD14+ Monocyte	0.780562	2.65603	15.0513	0.000314971	0.0233426
chr1_154575724_154578563	chr1	154575724	154578563	2840	CHRNB2	7947	CD14+ Monocyte	1.19612	2.18635	14.9915	0.000315229	0.0233426
chr16_90033610_90034403	chr16	90033610	90034403	794	GAS8-AS1	3709	CD14+ Monocyte	0.764053	2.66124	15.0032	0.0003182	0.0235053
chr6_158802487_158803227	chr6	158802487	158803227	741	EZR-AS1	14751	CD14+ Monocyte	-1.29854	0.857393	14.5724	0.000319916	0.0235835
chr7_44952982_44953517	chr7	44952982	44953517	536	MYO1G	25498	CD14+ Monocyte	1.36335	0.8474	14.6593	0.000320129	0.0235835
chr17_77863617_77864613	chr17	77863617	77864613	997	LINC01973	19474	CD14+ Monocyte	-1.06294	2.53578	15.0374	0.000320592	0.0235835
chr4_38815343_38816796	chr4	38815343	38816796	1454	TLR1	10552	CD14+ Monocyte	-0.59378	3.51503	15.0295	0.000320629	0.0235835
chr8_67734556_67735302	chr8	67734556	67735302	747	CPA6	11058	CD14+ Monocyte	-1.01751	1.49933	14.912	0.000321245	0.0235901
chr17_77355134_77358237	chr17	77355134	77358237	3104	SEPTIN9	15099	CD14+ Monocyte	0.912156	2.18294	14.9249	0.000321266	0.0235901
chr2_142130133_142131639	chr2	142130133	142131639	1507	LRP1B	623	CD14+ Monocyte	1.39999	1.3678	14.7925	0.000322117	0.0236037
chr3_188427501_188427773	chr3	188427501	188427773	273	LPP-AS1	140893	CD14+ Monocyte	-0.973631	1.24647	14.7257	0.000322134	0.0236037
chr20_34811804_34812439	chr20	34811804	34812439	636	NCOA6	9200	CD14+ Monocyte	1.30382	1.02835	14.6823	0.000324115	0.0237183
chr6_109458845_109459284	chr6	109458845	109459284	440	MICAL1	2858	CD14+ Monocyte	-0.794419	2.95338	14.9814	0.000326457	0.0238486
chr16_21360144_21360534	chr16	21360144	21360534	391	CRYM	57082	CD14+ Monocyte	-0.69449	3.10275	14.9853	0.000326728	0.0238486
chr16_31134131_31135192	chr16	31134131	31135192	1062	PRSS8	535	CD14+ Monocyte	-0.547138	3.90827	14.975	0.000327591	0.0238913
chr5_78758300_78758888	chr5	78758300	78758888	589	LHFPL2	109528	CD14+ Monocyte	-0.834091	1.66201	14.9235	0.000328729	0.0239201
chr4_78056502_78058267	chr4	78056502	78058267	1766	FRAS1	698	CD14+ Monocyte	1.13578	1.7967	14.8343	0.00032901	0.0239201
chr15_38134330_38134730	chr15	38134330	38134730	401	LINC01852	61340	CD14+ Monocyte	-1.18606	2.68439	14.9687	0.000329021	0.0239201
chr4_85761446_85762438	chr4	85761446	85762438	993	ARHGAP24	16359	CD14+ Monocyte	-1.41793	1.66377	14.8528	0.000329375	0.0239201
chr5_78526948_78527728	chr5	78526948	78527728	781	LHFPL2	121044	CD14+ Monocyte	-0.614422	4.02436	14.9566	0.000329828	0.0239328
chrX_150879626_150880482	chrX	150879626	150880482	857	CD99L2	18186	CD14+ Monocyte	1.25793	2.0472	14.7853	0.000331547	0.0239888
chr12_133181231_133181955	chr12	133181231	133181955	725	ZNF268	263	CD14+ Monocyte	0.52985	3.89704	14.9441	0.000331615	0.0239888
chr16_88639452_88641046	chr16	88639452	88641046	1595	IL17C	881	CD14+ Monocyte	0.77977	2.67459	14.9295	0.000331714	0.0239888
chr20_1567771_1568305	chr20	1567771	1568305	535	SIRPD	10066	CD14+ Monocyte	-0.933021	1.68218	14.8779	0.000332488	0.0240143
chr12_51246155_51246770	chr12	51246155	51246770	616	DAZAP2	7330	CD14+ Monocyte	-0.567564	3.87752	14.9237	0.000334268	0.0240723
chr17_80404733_80406136	chr17	80404733	80406136	1404	ENDOV	9030	CD14+ Monocyte	1.70018	1.16106	14.5872	0.000334661	0.0240805
chr1_220112951_220113631	chr1	220112951	220113631	681	IARS2	18820	CD14+ Monocyte	1.04779	1.38735	14.7403	0.000335576	0.0240842
chr1_235919746_235920448	chr1	235919746	235920448	703	LYST	36033	CD14+ Monocyte	-0.687431	2.75659	14.9143	0.000336025	0.0240842
chr19_55166022_55167248	chr19	55166022	55167248	1227	DNAAF3	526	CD14+ Monocyte	0.945447	4.56216	14.9099	0.000336112	0.0240842
chr10_86354769_86356143	chr10	86354769	86356143	1375	WAPL	165641	CD14+ Monocyte	-0.628714	3.46881	14.8948	0.000338367	0.0242054
chr6_52352002_52352965	chr6	52352002	52352965	964	PAQR8	9185	CD14+ Monocyte	-0.559775	5.24252	14.8873	0.000338798	0.0242054
chr12_120216968_120217527	chr12	120216968	120217527	560	PXN-AS1	15678	CD14+ Monocyte	1.50164	1.40486	14.6506	0.000339161	0.0242054
chr17_1058402_1058957	chr17	1058402	1058957	556	ABR	20036	CD14+ Monocyte	0.82757	2.12733	14.8513	0.00033959	0.0242054
chr11_47349030_47349738	chr11	47349030	47349738	709	MYBPC3	2964	CD14+ Monocyte	1.16958	1.30696	14.6056	0.000339602	0.0242054
chr13_108368012_108369255	chr13	108368012	108369255	1244	TNFSF13B	98295	CD14+ Monocyte	-0.637261	3.01315	14.8911	0.000339615	0.0242054
chr10_61464432_61465342	chr10	61464432	61465342	911	TMEM26-AS1	11794	CD14+ Monocyte	-1.01421	2.57386	14.8894	0.000339772	0.0242054
chr14_73568979_73570377	chr14	73568979	73570377	1399	ACOT2	79	CD14+ Monocyte	0.638335	3.13856	14.875	0.000341718	0.0243038
chr22_18148192_18148679	chr22	18148192	18148679	488	USP18	1490	CD14+ Monocyte	1.72898	1.418	14.5916	0.000342355	0.024329
chr13_51518651_51519303	chr13	51518651	51519303	653	WDFY2	65158	CD14+ Monocyte	-1.07916	2.35822	14.8649	0.000343218	0.0243702
chr2_134736332_134736914	chr2	134736332	134736914	583	TMEM163	17332	CD14+ Monocyte	-0.50595	3.16416	14.8603	0.000343578	0.0243756
chr1_235928145_235928617	chr1	235928145	235928617	473	LYST	44432	CD14+ Monocyte	-1.24182	0.852811	14.4605	0.00034604	0.02453
chr5_73859501_73860446	chr5	73859501	73860446	946	ARHGEF28	45956	CD14+ Monocyte	-0.760492	3.46244	14.8329	0.000347333	0.0245714
chr1_151158352_151158858	chr1	151158352	151158858	507	TNFAIP8L2	1704	CD14+ Monocyte	0.902708	2.35446	14.767	0.000347765	0.0245714
chr12_16156043_16156480	chr12	16156043	16156480	438	MGST1	190661	CD14+ Monocyte	-1.15407	1.06344	14.5909	0.000348299	0.024589
chr8_123407433_123408167	chr8	123407433	123408167	735	ATAD2	10986	CD14+ Monocyte	1.33305	1.07969	14.5096	0.000348821	0.0245972
chrX_129734501_129734803	chrX	129734501	129734803	303	XPNPEP2	4175	CD14+ Monocyte	1.32229	1.44262	14.5909	0.000349797	0.0246139
chr15_61835262_61835924	chr15	61835262	61835924	663	VPS13C	224523	CD14+ Monocyte	0.845644	1.53944	14.6853	0.000350432	0.0246385
chr12_11839163_11839760	chr12	11839163	11839760	598	ETV6	189490	CD14+ Monocyte	-0.595922	3.41252	14.803	0.000351501	0.0246831
chr21_29255978_29257055	chr21	29255978	29257055	1078	BACH1	41866	CD14+ Monocyte	-0.770264	2.11319	14.7676	0.000352841	0.0247179
chr7_39727350_39728124	chr7	39727350	39728124	775	LINC00265	5443	CD14+ Monocyte	-0.94505	1.87298	14.7335	0.000352998	0.0247179
chr1_146051479_146052749	chr1	146051479	146052749	1271	LINC01719	154	CD14+ Monocyte	0.600773	4.33707	14.7839	0.000353551	0.0247365
chr6_124539052_124539406	chr6	124539052	124539406	355	NKAIN2	256048	CD14+ Monocyte	-1.48798	0.98209	14.5206	0.000355843	0.0248564
chr8_60851894_60852473	chr8	60851894	60852473	580	CHD7	110636	CD14+ Monocyte	-0.505778	4.48851	14.7645	0.00035614	0.024857
chr1_46369729_46370491	chr1	46369729	46370491	763	FAAH	23825	CD14+ Monocyte	-0.641608	2.67102	14.7537	0.000358039	0.0248949
chr6_24745009_24745504	chr6	24745009	24745504	496	C6orf62	25855	CD14+ Monocyte	-0.745311	2.77911	14.7418	0.000358453	0.0248949
chr6_161359276_161359808	chr6	161359276	161359808	533	AGPAT4	85215	CD14+ Monocyte	-1.11525	3.12337	14.7567	0.000358462	0.0248949
chr8_143206248_143207631	chr8	143206248	143207631	1384	ZFP41	39307	CD14+ Monocyte	1.73076	1.1455	14.3925	0.00035914	0.0248949
chr6_14655945_14656962	chr6	14655945	14656962	1018	LINC01108	370491	CD14+ Monocyte	-0.685412	2.62296	14.7516	0.00035916	0.0248949
chr8_143397864_143398906	chr8	143397864	143398906	1043	MAFA-AS1	18772	CD14+ Monocyte	0.776686	3.99718	14.7456	0.000359259	0.0248949
chr2_195574110_195574756	chr2	195574110	195574756	647	SLC39A10	82201	CD14+ Monocyte	-0.895335	2.16981	14.7393	0.000359286	0.0248949
chr1_204806911_204807649	chr1	204806911	204807649	739	NFASC	21002	CD14+ Monocyte	0.526871	3.82148	14.7438	0.000359711	0.0249043
chr1_183646559_183647209	chr1	183646559	183647209	651	RGL1	10451	CD14+ Monocyte	-0.964923	1.98332	14.7188	0.000360792	0.024939
chr12_24742204_24742932	chr12	24742204	24742932	729	LINC00477	158036	CD14+ Monocyte	-0.610155	2.82328	14.7344	0.000361939	0.0249944
chr16_30519362_30520750	chr16	30519362	30520750	1389	ZNF768	5816	CD14+ Monocyte	1.41676	1.04881	14.321	0.000362221	0.0249944
chr11_67190076_67190901	chr11	67190076	67190901	826	KDM2A	49112	CD14+ Monocyte	0.869073	2.92462	14.6416	0.00036348	0.0250291
chr5_132435935_132436215	chr5	132435935	132436215	281	IRF1	54558	CD14+ Monocyte	-1.12343	1.45982	14.4419	0.000363798	0.0250291
chr8_132895181_132896318	chr8	132895181	132896318	1138	TG	28224	CD14+ Monocyte	-0.524995	4.35097	14.6887	0.000367328	0.02521
chr3_23981248_23982690	chr3	23981248	23982690	1443	NKIRAS1	34686	CD14+ Monocyte	1.41293	0.718903	14.2935	0.000367564	0.02521
chr5_138470134_138471169	chr5	138470134	138471169	1036	EGR1	4656	CD14+ Monocyte	1.76585	3.57859	14.6663	0.000367884	0.02521
chr4_41514479_41515466	chr4	41514479	41515466	988	LIMCH1	22690	CD14+ Monocyte	-0.643997	3.0696	14.6925	0.000367935	0.02521
chr2_234425493_234428004	chr2	234425493	234428004	2512	LINC01891	26591	CD14+ Monocyte	-0.625578	4.29115	14.6767	0.000369185	0.0252504
chr8_29752299_29752855	chr8	29752299	29752855	557	LINC02099	3991	CD14+ Monocyte	-0.796219	2.20367	14.6799	0.000369583	0.0252504
chr2_16832680_16833395	chr2	16832680	16833395	716	VSNL1	706576	CD14+ Monocyte	-1.14885	1.20272	14.5117	0.000369738	0.0252504
chr12_19761240_19762106	chr12	19761240	19762106	867	AEBP2	320642	CD14+ Monocyte	-0.833385	2.27091	14.6756	0.000370044	0.0252504
chr10_87657354_87658006	chr10	87657354	87658006	653	PAPSS2	1871	CD14+ Monocyte	-0.64342	3.32295	14.6739	0.000370286	0.0252504
chr8_125268678_125269042	chr8	125268678	125269042	365	TRIB1	161315	CD14+ Monocyte	-0.95693	1.44406	14.5613	0.000370699	0.0252586
chr8_133942343_133943252	chr8	133942343	133943252	910	ST3GAL1	370456	CD14+ Monocyte	-0.946296	1.84195	14.604	0.000371917	0.0253034
chr2_202672936_202673746	chr2	202672936	202673746	811	FAM117B	37968	CD14+ Monocyte	-1.44613	0.631379	14.23	0.000371945	0.0253034
chrX_13131543_13132211	chrX	13131543	13132211	669	FAM9C	86923	CD14+ Monocyte	-0.923566	2.64303	14.6602	0.000372968	0.0253156
chr22_50206756_50207935	chr22	50206756	50207935	1180	SELENOO	5746	CD14+ Monocyte	0.724496	3.24874	14.6509	0.000373693	0.0253156
chr7_5441612_5442682	chr7	5441612	5442682	1071	TNRC18	18066	CD14+ Monocyte	-0.658836	2.86915	14.6529	0.000373918	0.0253156
chr11_88174574_88176257	chr11	88174574	88176257	1684	RAB38	814	CD14+ Monocyte	0.841035	2.78883	14.6441	0.000374246	0.0253156
chrX_9313204_9313626	chrX	9313204	9313626	423	TBL1X	149668	CD14+ Monocyte	1.01404	1.15486	14.3621	0.000374566	0.0253156
chr2_86367942_86368774	chr2	86367942	86368774	833	REEP1	29859	CD14+ Monocyte	-0.725085	2.53158	14.6504	0.000374772	0.0253156
chr3_15306021_15306819	chr3	15306021	15306819	799	SH3BP5	25767	CD14+ Monocyte	-0.834255	1.88557	14.5639	0.000375216	0.0253258
chr11_20046147_20046860	chr11	20046147	20046860	714	NAV2-AS2	2443	CD14+ Monocyte	-1.17089	1.06649	14.4176	0.000379689	0.0255675
chr8_96853828_96855158	chr8	96853828	96855158	1331	CPQ	208587	CD14+ Monocyte	-0.529087	4.32165	14.6026	0.000380384	0.0255943
chr15_39939607_39940263	chr15	39939607	39940263	657	EIF2AK4	5493	CD14+ Monocyte	-1.59267	0.582255	14.1734	0.000381255	0.0256328
chr4_6773926_6774631	chr4	6773926	6774631	706	KIAA0232	8095	CD14+ Monocyte	-0.89662	3.09253	14.5978	0.00038228	0.0256791
chr17_7988664_7989131	chr17	7988664	7989131	468	GUCY2D	13483	CD14+ Monocyte	0.680345	2.42925	14.5651	0.000383465	0.0256791
chr9_27347622_27348220	chr9	27347622	27348220	599	EQTN	50472	CD14+ Monocyte	-1.05089	1.47444	14.5034	0.00038427	0.025695
chr11_65370845_65371656	chr11	65370845	65371656	812	SLC25A45	10315	CD14+ Monocyte	-0.921546	1.66318	14.4686	0.000385611	0.0257447
chr11_326336_327616	chr11	326336	327616	1281	IFITM3	5476	CD14+ Monocyte	0.669726	4.95324	14.554	0.000387892	0.0258568
chr20_3744831_3745519	chr20	3744831	3745519	689	HSPA12B	12147	CD14+ Monocyte	0.666335	4.46331	14.5493	0.000388744	0.0258726
chr3_178982131_178982449	chr3	178982131	178982449	319	ZMAT3	86893	CD14+ Monocyte	1.61571	0.848216	14.2016	0.00039161	0.0260063
chr11_396273_397687	chr11	396273	397687	1415	SIGIRR	17312	CD14+ Monocyte	0.707297	3.7175	14.5223	0.000393863	0.0261139
chr8_100938572_100940241	chr8	100938572	100940241	1670	YWHAZ	10330	CD14+ Monocyte	0.581161	3.43411	14.5239	0.000393962	0.0261139
chr5_783935_785845	chr5	783935	785845	1911	ZDHHC11B	794	CD14+ Monocyte	1.92401	1.50694	14.2699	0.000394321	0.0261139
chr15_74322443_74323115	chr15	74322443	74323115	673	SEMA7A	110589	CD14+ Monocyte	1.17551	1.01245	14.2572	0.000394653	0.0261139
chr8_20141193_20142342	chr8	20141193	20142342	1150	SLC18A1	40794	CD14+ Monocyte	-0.952156	2.11897	14.5023	0.0003953	0.0261176
chr2_231680683_231681741	chr2	231680683	231681741	1059	PTMA	26783	CD14+ Monocyte	0.616007	2.8112	14.5004	0.000397336	0.0261847
chr2_55693125_55694098	chr2	55693125	55694098	974	PNPT1	254	CD14+ Monocyte	0.525633	4.6208	14.4945	0.000397441	0.0261847
chr10_72164638_72165241	chr10	72164638	72165241	604	ASCC1	50715	CD14+ Monocyte	0.904974	1.68387	14.3999	0.000397696	0.0261847
chr16_12062453_12063254	chr16	12062453	12063254	802	SNX29	85720	CD14+ Monocyte	-0.917784	3.59719	14.4951	0.000397982	0.0261847
chr20_47531152_47532254	chr20	47531152	47532254	1103	NCOA3	29266	CD14+ Monocyte	-0.570545	2.97261	14.4949	0.000398581	0.0262041
chr6_30494578_30495318	chr6	30494578	30495318	741	HLA-E	5070	CD14+ Monocyte	0.842305	2.91495	14.4865	0.000399812	0.0262649
chr17_74786278_74787174	chr17	74786278	74787174	897	TMEM104	9780	CD14+ Monocyte	-0.594906	5.17759	14.4732	0.000400812	0.0263105
chr5_76292697_76293374	chr5	76292697	76293374	678	IQGAP2	109910	CD14+ Monocyte	-0.564364	3.59058	14.4752	0.000401158	0.0263113
chr20_50601630_50602317	chr20	50601630	50602317	688	RIPOR3	34601	CD14+ Monocyte	1.87287	0.690283	14.0508	0.000401983	0.0263113
chr15_63374366_63375158	chr15	63374366	63375158	793	CA12	6688	CD14+ Monocyte	1.16996	1.77275	14.3792	0.000402614	0.0263113
chr13_110137705_110139005	chr13	110137705	110139005	1301	COL4A1	168152	CD14+ Monocyte	-0.500515	5.05659	14.4615	0.000402738	0.0263113
chr14_60161460_60162102	chr14	60161460	60162102	643	DHRS7	3296	CD14+ Monocyte	-0.710447	2.80603	14.4684	0.000402869	0.0263113
chr10_4067092_4068757	chr10	4067092	4068757	1666	LINC00702	175155	CD14+ Monocyte	-0.832834	3.09691	14.468	0.000403605	0.0263332
chr2_137963641_137964765	chr2	137963641	137964765	1125	HNMT	293	CD14+ Monocyte	-0.616336	3.02753	14.4477	0.000406547	0.0264623
chr22_29640784_29642147	chr22	29640784	29642147	1364	NF2	37152	CD14+ Monocyte	0.88825	2.62856	14.4082	0.000406619	0.0264623
chr12_56320993_56321793	chr12	56320993	56321793	801	CNPY2	4645	CD14+ Monocyte	0.883722	4.00888	14.4429	0.000406823	0.0264623
chr18_45106211_45107029	chr18	45106211	45107029	819	SLC14A2	60933	CD14+ Monocyte	-0.661772	2.69598	14.4471	0.000407122	0.0264623
chr17_41633557_41635552	chr17	41633557	41635552	1996	KRT17	8982	CD14+ Monocyte	1.13075	1.62488	14.2439	0.000409708	0.0265829
chr9_38619971_38622721	chr9	38619971	38622721	2751	ANKRD18A	625	CD14+ Monocyte	0.777115	3.72697	14.4218	0.000410342	0.0265906
chr19_8384171_8385023	chr19	8384171	8385023	853	RAB11B	5336	CD14+ Monocyte	0.994394	2.12184	14.3707	0.000410641	0.0265906
chr6_151040814_151041559	chr6	151040814	151041559	746	MTHFD1L	33807	CD14+ Monocyte	-0.678223	4.44943	14.411	0.000411194	0.0266064
chr3_160105750_160106568	chr3	160105750	160106568	819	IL12A-AS1	100524	CD14+ Monocyte	-0.977576	1.7987	14.3952	0.00041174	0.0266067
chr2_241571158_241574371	chr2	241571158	241574371	3214	BOK-AS1	12015	CD14+ Monocyte	1.29472	1.68832	14.1996	0.000411817	0.0266067
chr16_84013904_84014634	chr16	84013904	84014634	731	SLC38A8	28161	CD14+ Monocyte	0.864984	4.51494	14.382	0.000416203	0.0268096
chr7_116095324_116096014	chr7	116095324	116096014	691	TFEC	64561	CD14+ Monocyte	-0.879318	1.96116	14.3474	0.000417161	0.0268369
chr2_224922038_224922859	chr2	224922038	224922859	822	DOCK10	24190	CD14+ Monocyte	-0.524477	3.84443	14.3763	0.000417542	0.0268369
chr10_127926336_127927073	chr10	127926336	127927073	738	PTPRE	19234	CD14+ Monocyte	-0.550405	3.66882	14.3541	0.000421359	0.0270422
chr16_84609558_84610110	chr16	84609558	84610110	553	COTL1	7968	CD14+ Monocyte	0.763036	2.96867	14.3528	0.0004217	0.0270422
chr9_76245394_76246315	chr9	76245394	76246315	922	RFK	148111	CD14+ Monocyte	-1.27463	1.22342	14.2377	0.000423344	0.0271073
chr11_35048138_35048972	chr11	35048138	35048972	835	CD44	90198	CD14+ Monocyte	-0.934717	2.30163	14.3181	0.000423345	0.0271073
chr6_24228558_24229357	chr6	24228558	24229357	800	MRS2	173550	CD14+ Monocyte	-0.69049	2.52766	14.3444	0.000423906	0.027123
chr11_66458816_66459876	chr11	66458816	66459876	1061	PELI3	6450	CD14+ Monocyte	-0.970914	1.7988	14.2718	0.000424914	0.0271472
chr5_60541813_60542356	chr5	60541813	60542356	544	PDE4D	45527	CD14+ Monocyte	-0.7486	2.6306	14.3356	0.000425468	0.0271624
chr12_56336707_56337147	chr12	56336707	56337147	441	IL23A	1736	CD14+ Monocyte	-0.591799	3.13048	14.3322	0.00042612	0.0271835
chr8_143407417_143408442	chr8	143407417	143408442	1026	MAFA-AS1	9236	CD14+ Monocyte	0.744109	2.75855	14.3238	0.000426429	0.0271835
chr2_74573779_74574375	chr2	74573779	74574375	597	DOK1	19620	CD14+ Monocyte	-0.693459	2.80072	14.3272	0.00042713	0.027208
chr5_175765714_175766231	chr5	175765714	175766231	518	CPLX2	30301	CD14+ Monocyte	1.09456	1.24929	14.132	0.000428764	0.0272542
chr17_62895494_62896402	chr17	62895494	62896402	909	TANC2	69832	CD14+ Monocyte	-0.822978	3.8373	14.311	0.000428836	0.0272542
chr11_59009708_59010232	chr11	59009708	59010232	525	FAM111B	96952	CD14+ Monocyte	-0.824076	1.94197	14.2952	0.000429939	0.0272542
chr7_24833497_24834641	chr7	24833497	24834641	1145	OSBPL3	57980	CD14+ Monocyte	-0.592868	3.72876	14.3026	0.000430451	0.0272542
chr4_3487620_3489901	chr4	3487620	3489901	2282	DOK7	3077	CD14+ Monocyte	1.05176	2.16469	14.2602	0.000430634	0.0272542
chr3_141485594_141486356	chr3	141485594	141486356	763	RASA2	670	CD14+ Monocyte	-0.699865	3.15849	14.3066	0.000430671	0.0272542
chr14_68822187_68822764	chr14	68822187	68822764	578	ZFP36L1	25944	CD14+ Monocyte	1.06316	1.33047	14.1346	0.000431004	0.0272542
chr6_7331932_7332605	chr6	7331932	7332605	674	SSR1	18733	CD14+ Monocyte	-0.954229	1.81022	14.2509	0.000432154	0.0272627
chr15_100536905_100538184	chr15	100536905	100538184	1280	CERS3	6102	CD14+ Monocyte	-1.06993	3.31084	14.2929	0.00043252	0.0272627
chr2_168174727_168175245	chr2	168174727	168175245	519	STK39	72350	CD14+ Monocyte	-1.04806	1.49395	14.2001	0.00043262	0.0272627
chr10_3424217_3424842	chr10	3424217	3424842	626	LINC02669	77996	CD14+ Monocyte	-0.837448	2.08553	14.2918	0.00043268	0.0272627
chr19_54375162_54376067	chr19	54375162	54376067	906	LAIR1	4606	CD14+ Monocyte	-0.6723	3.57308	14.2924	0.000432741	0.0272627
chr21_45636662_45637822	chr21	45636662	45637822	1161	PCBP3	5902	CD14+ Monocyte	1.66152	0.814104	13.8958	0.000433876	0.0272864
chr12_38586782_38588244	chr12	38586782	38588244	1463	ALG10B	270009	CD14+ Monocyte	-0.701071	2.59744	14.2902	0.000434144	0.0272864
chr2_174281673_174283055	chr2	174281673	174283055	1383	OLA1	33141	CD14+ Monocyte	-0.89179	2.35328	14.2761	0.000436172	0.0273786
chr19_47765532_47766372	chr19	47765532	47766372	841	NOP53-AS1	2468	CD14+ Monocyte	1.11405	1.56696	14.0532	0.000437661	0.0274121
chr5_88829113_88829488	chr5	88829113	88829488	376	MEF2C	1925	CD14+ Monocyte	-0.589126	3.33772	14.2582	0.000438524	0.0274378
chr2_200305890_200307778	chr2	200305890	200307778	1889	SPATS2L	10	CD14+ Monocyte	0.615578	3.86099	14.253	0.00043939	0.0274479
chr11_128273190_128274030	chr11	128273190	128274030	841	ETS1	248280	CD14+ Monocyte	-1.25902	1.0848	14.0239	0.000439509	0.0274479
chr19_6767299_6768356	chr19	6767299	6768356	1058	SH2D3A	136	CD14+ Monocyte	0.558673	4.80107	14.2427	0.000440445	0.027464
chr10_71378426_71379078	chr10	71378426	71379078	653	CDH23	17841	CD14+ Monocyte	-0.586437	3.2314	14.2513	0.000440542	0.027464
chr2_224945263_224945481	chr2	224945263	224945481	219	DOCK10	1568	CD14+ Monocyte	-0.979585	1.73464	14.1614	0.000440724	0.027464
chr10_31004600_31005248	chr10	31004600	31005248	649	ZNF438	5083	CD14+ Monocyte	-0.876753	1.92261	14.1615	0.000441594	0.0274984
chr17_62899218_62899685	chr17	62899218	62899685	468	TANC2	66549	CD14+ Monocyte	-1.12127	3.10824	14.2423	0.000442508	0.0275278
chr9_137156526_137157930	chr9	137156526	137157930	1405	LRRC26	12121	CD14+ Monocyte	0.754623	2.74964	14.2223	0.00044382	0.0275594
chr7_131280768_131281831	chr7	131280768	131281831	1064	MKLN1-AS	45948	CD14+ Monocyte	-1.12842	1.00465	13.9748	0.000443856	0.0275594
chr19_4542657_4543786	chr19	4542657	4543786	1130	LRG1	2621	CD14+ Monocyte	0.525275	4.70057	14.217	0.000445185	0.0276038
chr20_59991123_59992087	chr20	59991123	59992087	965	CDH26	4286	CD14+ Monocyte	-1.18447	1.1003	14.0111	0.000445235	0.0276038
chr12_96044193_96045170	chr12	96044193	96045170	978	LTA4H	673	CD14+ Monocyte	-0.759536	2.75769	14.2225	0.000445533	0.0276038
chr1_110643819_110644323	chr1	110643819	110644323	505	KCNA3	27452	CD14+ Monocyte	-0.504327	3.40013	14.2079	0.000447666	0.0276961
chr1_120544353_120545045	chr1	120544353	120545045	693	NBPF26	260510	CD14+ Monocyte	1.62049	0.733768	13.857	0.000448858	0.0277416
chr20_8475745_8476423	chr20	8475745	8476423	679	PLCB1-IT1	227042	CD14+ Monocyte	-0.764728	3.34105	14.1985	0.000449397	0.0277433
chr17_62892858_62893410	chr17	62892858	62893410	553	TANC2	72824	CD14+ Monocyte	-0.572303	4.13311	14.1795	0.000452254	0.0278797
chr1_241810772_241811706	chr1	241810772	241811706	935	EXO1	36484	CD14+ Monocyte	-0.913936	2.83686	14.1809	0.000453803	0.0279552
chr13_40428089_40428985	chr13	40428089	40428985	897	LINC00598	52021	CD14+ Monocyte	-1.02651	2.66256	14.1682	0.000456304	0.0280653
chr13_46369399_46370324	chr13	46369399	46370324	926	RUBCNL	16928	CD14+ Monocyte	-0.712752	2.12771	14.133	0.000457221	0.0280653
chr6_138521517_138522325	chr6	138521517	138522325	809	NHSL1	22023	CD14+ Monocyte	-0.842096	2.46853	14.1525	0.000458751	0.0281391
chr1_93703751_93704633	chr1	93703751	93704633	883	BCAR3	21914	CD14+ Monocyte	-0.79945	2.63258	14.1461	0.000460028	0.0281677
chr15_66191479_66191889	chr15	66191479	66191889	411	MEGF11	61861	CD14+ Monocyte	1.42717	0.640204	13.8127	0.000460199	0.0281677
chr1_65092605_65092974	chr1	65092605	65092974	370	JAK1	24859	CD14+ Monocyte	-1.4329	0.827791	13.791	0.000462542	0.028291
chr5_135030628_135031774	chr5	135030628	135031774	1147	C5orf66	1499	CD14+ Monocyte	1.06554	1.57844	13.9178	0.0004629	0.0282928
chr11_350407_351299	chr11	350407	351299	893	IFITM3	29547	CD14+ Monocyte	0.961917	2.10634	14.0424	0.000463434	0.0282934
chr6_56595315_56595921	chr6	56595315	56595921	607	DST	46968	CD14+ Monocyte	-0.701616	2.39518	14.1248	0.000463568	0.0282934
chr7_1143970_1144774	chr7	1143970	1144774	805	C7orf50	5713	CD14+ Monocyte	-0.96629	1.81553	14.0678	0.000464232	0.0282986
chr8_96384403_96385409	chr8	96384403	96385409	1007	SDC2	108403	CD14+ Monocyte	-0.937373	1.7309	14.0886	0.000464554	0.0282986
chr12_69027432_69028213	chr12	69027432	69028213	782	CPM	64192	CD14+ Monocyte	-0.987931	1.12496	13.8804	0.000465128	0.0282986
chr3_60992454_60992856	chr3	60992454	60992856	403	FHIT	258596	CD14+ Monocyte	-1.13492	1.0443	13.9518	0.000465303	0.0282986
chr1_161235500_161236786	chr1	161235500	161236786	1287	NR1I3	1417	CD14+ Monocyte	0.926863	1.92476	13.9611	0.000465625	0.0282986
chr4_133148086_133149468	chr4	133148086	133149468	1383	PCDH10	175	CD14+ Monocyte	1.5069	1.8477	13.9667	0.000466141	0.0283099
chr20_35305566_35306218	chr20	35305566	35306218	653	FAM83C	13141	CD14+ Monocyte	1.79031	2.42085	14.0025	0.000466674	0.0283223
chr8_144221581_144224071	chr8	144221581	144224071	2491	SCX	42381	CD14+ Monocyte	0.898698	2.05239	14.0274	0.000468899	0.0284373
chr12_82027630_82028270	chr12	82027630	82028270	641	LINC02426	73912	CD14+ Monocyte	-1.13702	0.592686	13.6865	0.000471536	0.0285201
chr6_10403977_10404930	chr6	10403977	10404930	954	TFAP2A-AS2	429	CD14+ Monocyte	0.634564	3.56325	14.0786	0.000472166	0.0285201
chr2_241863395_241863895	chr2	241863395	241863895	501	PDCD1	4501	CD14+ Monocyte	1.59121	1.39661	13.7817	0.000472754	0.0285201
chr3_150540764_150541435	chr3	150540764	150541435	672	SERP1	5061	CD14+ Monocyte	-0.784583	2.43853	14.0733	0.000472982	0.0285201
chr6_13216422_13217000	chr6	13216422	13217000	579	TBC1D7	111537	CD14+ Monocyte	-1.1207	0.986684	13.8787	0.000473134	0.0285201
chr19_13155371_13156196	chr19	13155371	13156196	826	IER2	4961	CD14+ Monocyte	0.720664	4.8033	14.0685	0.00047325	0.0285201
chr7_128697089_128697889	chr7	128697089	128697889	801	FAM71F1	11171	CD14+ Monocyte	0.519509	3.76864	14.0704	0.000473303	0.0285201
chr22_41768144_41768882	chr22	41768144	41768882	739	CCDC134	31796	CD14+ Monocyte	-0.726171	3.96868	14.0672	0.000473775	0.0285201
chrX_73955505_73956147	chrX	73955505	73956147	643	JPX	11182	CD14+ Monocyte	1.36974	1.02742	13.7506	0.00047391	0.0285201
chr7_151992301_151992905	chr7	151992301	151992905	605	GALNT11	32768	CD14+ Monocyte	-0.953084	2.10767	14.0565	0.000475004	0.0285389
chr7_75817060_75817537	chr7	75817060	75817537	478	CCL24	3254	CD14+ Monocyte	-1.09386	1.40493	13.9277	0.000475932	0.0285389
chr19_55082412_55082734	chr19	55082412	55082734	323	EPS8L1	2021	CD14+ Monocyte	0.864607	2.61335	14.046	0.000476543	0.0285389
chr20_49484133_49484574	chr20	49484133	49484574	442	KCNB1	1465	CD14+ Monocyte	1.53162	0.928258	13.7204	0.000477224	0.0285597
chr8_126556294_126558865	chr8	126556294	126558865	2572	LRATD2	387	CD14+ Monocyte	0.604425	3.86982	14.0435	0.000478573	0.0286069
chr7_17632506_17633665	chr7	17632506	17633665	1160	SNX13	306829	CD14+ Monocyte	-0.736839	2.87978	14.0502	0.000478676	0.0286069
chr10_119482859_119484307	chr10	119482859	119484307	1449	RGS10	52226	CD14+ Monocyte	1.12047	1.92871	13.9476	0.00047926	0.0286219
chr3_183313159_183314060	chr3	183313159	183314060	902	B3GNT5	59907	CD14+ Monocyte	-0.556288	3.28007	14.0326	0.000481353	0.0286848
chr21_25903468_25904425	chr21	25903468	25904425	958	ATP5PF	167814	CD14+ Monocyte	-0.650376	3.56467	14.0269	0.000481979	0.0286848
chr11_2836842_2837989	chr11	2836842	2837989	1148	KCNQ1-AS1	23580	CD14+ Monocyte	1.09826	2.90267	14.0196	0.000483355	0.0286884
chr1_165877839_165878599	chr1	165877839	165878599	761	UCK2	50226	CD14+ Monocyte	-0.560409	3.0743	14.0207	0.000484038	0.0286884
chr12_26340461_26341352	chr12	26340461	26341352	892	SSPN	144889	CD14+ Monocyte	-0.864992	2.50567	14.0235	0.000484144	0.0286884
chr21_42614465_42615776	chr21	42614465	42615776	1312	LINC01671	630	CD14+ Monocyte	1.066	1.42237	13.8421	0.000484202	0.0286884
chr6_161235779_161236799	chr6	161235779	161236799	1021	AGPAT4	37262	CD14+ Monocyte	-1.09856	0.99588	13.6723	0.00048544	0.0287318
chr1_212995463_212996094	chr1	212995463	212996094	632	ANGEL2	19415	CD14+ Monocyte	0.913332	1.36374	13.8869	0.000487445	0.0288306
chr18_21117462_21118491	chr18	21117462	21118491	1030	ROCK1	5649	CD14+ Monocyte	-0.568883	4.07895	13.9923	0.000488395	0.0288641
chr17_59842610_59844660	chr17	59842610	59844660	2051	TUBD1	48283	CD14+ Monocyte	0.716298	4.59475	13.9917	0.000488682	0.0288641
chr1_230573615_230574288	chr1	230573615	230574288	674	LINC01737	21295	CD14+ Monocyte	-0.968003	1.65124	13.9208	0.000490294	0.0289172
chr9_111068086_111069382	chr9	111068086	111069382	1297	LPAR1	29088	CD14+ Monocyte	-0.53769	3.55658	13.9814	0.000491262	0.0289172
chr5_132746986_132748177	chr5	132746986	132748177	1192	CCNI2	439	CD14+ Monocyte	0.89129	1.86221	13.9035	0.000492617	0.0289658
chr2_144472379_144474559	chr2	144472379	144474559	2181	ZEB2-AS1	45054	CD14+ Monocyte	1.05037	2.55263	13.9666	0.000493275	0.0289658
chr14_73467425_73467742	chr14	73467425	73467742	318	NUMB	8845	CD14+ Monocyte	-0.79729	3.3228	13.9701	0.000493334	0.0289658
chr3_45163561_45164018	chr3	45163561	45164018	458	CDCP1	17139	CD14+ Monocyte	-0.724335	2.64704	13.9781	0.000493433	0.0289658
chr10_110081780_110082388	chr10	110081780	110082388	609	ADD3-AS1	73399	CD14+ Monocyte	-0.737997	3.08842	13.9605	0.00049585	0.0290482
chr2_159497187_159498022	chr2	159497187	159498022	836	BAZ2B	117543	CD14+ Monocyte	-0.569811	3.41497	13.9551	0.000496619	0.0290621
chr4_39814708_39816289	chr4	39814708	39816289	1582	UBE2K	116573	CD14+ Monocyte	1.15243	1.64883	13.8174	0.000496762	0.0290621
chr8_143420499_143421560	chr8	143420499	143421560	1062	MAFA-AS1	2821	CD14+ Monocyte	1.46938	0.895355	13.6939	0.000497413	0.0290804
chr2_203787813_203788493	chr2	203787813	203788493	681	CTLA4	79277	CD14+ Monocyte	-0.800746	2.50462	13.9519	0.000498568	0.029101
chr9_96020490_96021879	chr9	96020490	96021879	1390	LINC00092	68	CD14+ Monocyte	0.96991	2.24163	13.8656	0.000498958	0.029101
chr15_41374395_41375589	chr15	41374395	41375589	1195	NDUFAF1	26907	CD14+ Monocyte	0.674081	3.42258	13.9413	0.000499794	0.0291207
chr8_80690636_80691450	chr8	80690636	80691450	815	ZNF704	183018	CD14+ Monocyte	-0.608905	2.87692	13.9392	0.000500786	0.0291588
chr9_120478261_120478589	chr9	120478261	120478589	329	CDK5RAP2	101578	CD14+ Monocyte	-1.30894	1.01015	13.6402	0.000501956	0.0291874
chr18_741626_742416	chr18	741626	742416	791	ENOSF1	28962	CD14+ Monocyte	0.831777	1.53311	13.7945	0.0005035	0.0292574
chr11_102303263_102304096	chr11	102303263	102304096	834	BIRC3	13387	CD14+ Monocyte	-0.920129	2.49042	13.9153	0.000504884	0.0292878
chr17_63600385_63601455	chr17	63600385	63601455	1071	TACO1	509	CD14+ Monocyte	0.509731	3.76295	13.9104	0.000505589	0.0292996
chr6_91475993_91476344	chr6	91475993	91476344	352	MAP3K7	888921	CD14+ Monocyte	-1.5618	0.3775	13.4852	0.000506414	0.0293277
chr2_217430709_217431512	chr2	217430709	217431512	804	DIRC3-AS1	147977	CD14+ Monocyte	-1.20954	1.21724	13.7369	0.00050716	0.0293511
chr9_136493402_136494405	chr9	136493402	136494405	1004	SEC16A	9643	CD14+ Monocyte	1.18727	1.31734	13.5963	0.000508353	0.0294005
chr6_111992697_111993402	chr6	111992697	111993402	706	CCN6	60701	CD14+ Monocyte	-1.05711	2.4243	13.8875	0.000509582	0.029432
chr4_77007069_77008275	chr4	77007069	77008275	1207	SEPTIN11	57318	CD14+ Monocyte	-0.865411	2.95756	13.8919	0.000509957	0.0294339
chr2_241740091_241741573	chr2	241740091	241741573	1483	D2HGDH	5462	CD14+ Monocyte	1.66594	2.25635	13.698	0.000510361	0.0294375
chr14_50957256_50957587	chr14	50957256	50957587	332	PYGL	12773	CD14+ Monocyte	-1.13142	1.24364	13.6876	0.000511386	0.029468
chr17_10205608_10206047	chr17	10205608	10206047	440	GAS7	7002	CD14+ Monocyte	1.36304	1.05735	13.6208	0.000512269	0.0294882
chr2_102282667_102283317	chr2	102282667	102283317	651	IL1RL1	28184	CD14+ Monocyte	-0.749215	2.63132	13.8826	0.000512963	0.0295084
chr3_194481240_194481676	chr3	194481240	194481676	437	ATP13A3	5326	CD14+ Monocyte	-1.02323	1.25145	13.649	0.00051482	0.0295526
chr3_52225364_52226657	chr3	52225364	52226657	1294	TLR9	494	CD14+ Monocyte	-0.540417	3.80526	13.8599	0.000516115	0.0295526
chr4_78656858_78657421	chr4	78656858	78657421	564	LINC01094	10865	CD14+ Monocyte	-0.620731	2.9473	13.8607	0.000516935	0.0295787
chr19_14166593_14166909	chr19	14166593	14166909	317	ASF1B	30004	CD14+ Monocyte	1.24855	0.735721	13.508	0.000517328	0.0295815
chr7_113421642_113422183	chr7	113421642	113422183	542	SMIM30	303060	CD14+ Monocyte	0.810402	1.89248	13.8051	0.000518976	0.0296364
chr19_17803061_17803845	chr19	17803061	17803845	785	B3GNT3	7924	CD14+ Monocyte	0.524231	2.88246	13.8488	0.000519801	0.0296638
chr12_94662925_94664314	chr12	94662925	94664314	1390	TMCC3	12368	CD14+ Monocyte	-0.790964	2.50069	13.8352	0.000521759	0.0297361
chr10_12270449_12271880	chr10	12270449	12271880	1432	CDC123	74262	CD14+ Monocyte	-0.605169	3.62947	13.8225	0.000524282	0.0298411
chr1_168626128_168626949	chr1	168626128	168626949	822	XCL1	49524	CD14+ Monocyte	-0.710271	2.77503	13.8262	0.000524295	0.0298411
chr3_157147997_157148662	chr3	157147997	157148662	666	CCNL1	11485	CD14+ Monocyte	0.934396	2.249	13.7546	0.000524643	0.0298412
chr19_40487689_40488362	chr19	40487689	40488362	674	SPTBN4	20689	CD14+ Monocyte	0.813499	2.83041	13.8177	0.000525421	0.0298558
chr10_79244899_79245149	chr10	79244899	79245149	251	PPIF	102319	CD14+ Monocyte	-0.633613	2.71698	13.8156	0.000525594	0.0298558
chr12_8389695_8391038	chr12	8389695	8391038	1344	LINC00937	286	CD14+ Monocyte	0.948145	3.06014	13.8046	0.000526004	0.0298594
chr8_133568949_133569176	chr8	133568949	133569176	228	ST3GAL1	2711	CD14+ Monocyte	-0.544574	3.10905	13.8136	0.000526783	0.0298642
chr11_93612219_93612582	chr11	93612219	93612582	364	CEP295	49099	CD14+ Monocyte	-0.982875	1.61403	13.7344	0.000527529	0.0298868
chr3_28342237_28342821	chr3	28342237	28342821	585	ZCWPW2	5899	CD14+ Monocyte	-0.97355	1.37326	13.6836	0.00052935	0.0299703
chr16_84810775_84811397	chr16	84810775	84811397	623	CRISPLD2	8587	CD14+ Monocyte	-0.738486	3.53663	13.7938	0.000530783	0.0299967
chr6_105810288_105811150	chr6	105810288	105811150	863	PRDM1	275185	CD14+ Monocyte	-0.757447	2.69952	13.8005	0.00053092	0.0299967
chr16_79519225_79520230	chr16	79519225	79520230	1006	MAF	80507	CD14+ Monocyte	-0.97659	2.26407	13.7917	0.00053125	0.0299967
chr1_160629564_160630945	chr1	160629564	160630945	1382	SLAMF1	16099	CD14+ Monocyte	0.502241	3.82992	13.7889	0.000531465	0.0299967
chr18_12910976_12912417	chr18	12910976	12912417	1442	PTPN2	26641	CD14+ Monocyte	0.610443	3.05469	13.795	0.000531559	0.0299967
chr7_127593823_127595119	chr7	127593823	127595119	1297	FSCN3	88	CD14+ Monocyte	-0.607612	3.51416	13.7785	0.000533913	0.0301098
chr11_65043862_65044239	chr11	65043862	65044239	378	SAC3D1	2653	CD14+ Monocyte	-0.650575	3.08727	13.7738	0.000534953	0.0301486
chr2_84829869_84830645	chr2	84829869	84830645	777	TRABD2A	50439	CD14+ Monocyte	-0.626106	3.87347	13.7607	0.000537502	0.0302725
chrX_30638404_30638883	chrX	30638404	30638883	480	GK	14475	CD14+ Monocyte	-0.624366	2.72996	13.7456	0.000538651	0.0302923
chr9_120753230_120753590	chr9	120753230	120753590	361	MEGF9	38760	CD14+ Monocyte	-1.09352	0.943945	13.5451	0.000538862	0.0302923
chr3_13004367_13004821	chr3	13004367	13004821	455	IQSEC1	17266	CD14+ Monocyte	-0.576358	3.13557	13.7589	0.000538909	0.0302923
chr16_86575648_86576879	chr16	86575648	86576879	1232	FOXC2	8820	CD14+ Monocyte	1.0665	2.32934	13.702	0.000540291	0.0303303
chr15_48001523_48002235	chr15	48001523	48002235	713	SLC24A5	118754	CD14+ Monocyte	-0.763498	1.73086	13.7084	0.00054163	0.0303857
chr1_235933218_235933997	chr1	235933218	235933997	780	LYST	49505	CD14+ Monocyte	-0.640431	3.02434	13.7343	0.000544731	0.0305397
chr14_74239975_74242389	chr14	74239975	74242389	2415	ABCD4	60545	CD14+ Monocyte	1.013	1.98582	13.5738	0.000548803	0.0306471
chr8_127441134_127441965	chr8	127441134	127441965	832	POU5F1B	25310	CD14+ Monocyte	-0.749177	3.00199	13.7148	0.000548909	0.0306471
chr17_43018304_43019202	chr17	43018304	43019202	899	VAT1	3183	CD14+ Monocyte	0.529909	3.57121	13.7116	0.000549331	0.0306471
chr4_81512948_81513359	chr4	81512948	81513359	412	RASGEF1B	41041	CD14+ Monocyte	-1.20898	1.18634	13.4619	0.000549536	0.0306471
chr8_17000873_17002564	chr8	17000873	17002564	1692	FGF20	219	CD14+ Monocyte	1.0977	1.33844	13.5244	0.00055008	0.0306471
chr16_72907974_72908946	chr16	72907974	72908946	973	ZFHX3	139182	CD14+ Monocyte	-0.817367	3.94086	13.6941	0.000552292	0.0307433
chr16_29173144_29174152	chr16	29173144	29174152	1009	LAT	188093	CD14+ Monocyte	-1.19538	2.09869	13.6767	0.000553259	0.0307742
chr9_15135114_15135634	chr9	15135114	15135634	521	TTC39B	114584	CD14+ Monocyte	1.03404	0.67062	13.4015	0.00055392	0.0307742
chr3_194325387_194328581	chr3	194325387	194328581	3195	LINC00887	12583	CD14+ Monocyte	0.93107	3.38568	13.6876	0.00055455	0.0307841
chr13_26971392_26972763	chr13	26971392	26972763	1372	USP12	199048	CD14+ Monocyte	0.894903	1.9008	13.6384	0.000554814	0.0307841
chr5_170333180_170333575	chr5	170333180	170333575	396	LINC01366	1788	CD14+ Monocyte	-0.591153	3.51018	13.6865	0.000555301	0.0307913
chr4_7653945_7654373	chr4	7653945	7654373	429	AFAP1-AS1	99716	CD14+ Monocyte	-0.68093	2.97669	13.6742	0.000558228	0.030894
chr17_32754838_32755537	chr17	32754838	32755537	700	MYO1D	121587	CD14+ Monocyte	-0.7396	2.13185	13.6573	0.00055823	0.030894
chr1_221074240_221075009	chr1	221074240	221075009	770	HLX-AS1	194100	CD14+ Monocyte	-0.665787	2.75641	13.676	0.000558666	0.0308983
chr1_1898963_1900124	chr1	1898963	1900124	1162	GNB1	7846	CD14+ Monocyte	0.942367	1.65469	13.4971	0.000559747	0.0309381
chr12_10395071_10396020	chr12	10395071	10396020	950	KLRK1	5030	CD14+ Monocyte	-0.535197	3.71502	13.6577	0.000561054	0.0309901
chr6_151029758_151030766	chr6	151029758	151030766	1009	MTHFD1L	22751	CD14+ Monocyte	-1.00437	2.16212	13.6497	0.000561804	0.0309921
chr17_35376053_35376643	chr17	35376053	35376643	591	SLFN11	2432	CD14+ Monocyte	-0.572329	3.41672	13.6503	0.000563562	0.0310493
chr2_238376857_238377384	chr2	238376857	238377384	528	ASB1	49542	CD14+ Monocyte	-0.669458	3.53187	13.646	0.000564164	0.0310626
chr19_44925274_44925835	chr19	44925274	44925835	562	APOC1	10603	CD14+ Monocyte	-0.889239	2.42518	13.6358	0.000565284	0.0310707
chr6_136215407_136216254	chr6	136215407	136216254	848	MTFR2	34057	CD14+ Monocyte	-0.679005	2.76059	13.6462	0.000565395	0.0310707
chr4_82216052_82216994	chr4	82216052	82216994	943	HNRNPD	156997	CD14+ Monocyte	-1.07251	1.93123	13.6139	0.000566469	0.0310722
chr8_128149911_128151697	chr8	128149911	128151697	1787	PVT1	355379	CD14+ Monocyte	-0.574778	4.57258	13.628	0.000567521	0.0310775
chr5_170861534_170862856	chr5	170861534	170862856	1323	RANBP17	483	CD14+ Monocyte	0.890355	2.61988	13.6176	0.000567538	0.0310775
chr2_104462622_104463343	chr2	104462622	104463343	722	LINC01102	28276	CD14+ Monocyte	-1.02535	0.782443	13.4088	0.000568157	0.0310775
chr2_61158290_61159251	chr2	61158290	61159251	962	C2orf74	2936	CD14+ Monocyte	-1.02165	1.60668	13.5623	0.000569333	0.0310775
chrX_84358198_84358896	chrX	84358198	84358896	699	HDX	143557	CD14+ Monocyte	-1.00788	0.926672	13.4368	0.000569443	0.0310775
chr8_141380274_141381553	chr8	141380274	141381553	1280	PTP4A3	10467	CD14+ Monocyte	0.623868	2.5483	13.6252	0.000569446	0.0310775
chr1_114108442_114109210	chr1	114108442	114109210	769	SYT6	43230	CD14+ Monocyte	-0.870767	2.73965	13.6274	0.000569491	0.0310775
chr20_2172468_2173088	chr20	2172468	2173088	621	STK35	70642	CD14+ Monocyte	0.72903	2.08375	13.5987	0.000569991	0.0310851
chr11_6240455_6241438	chr11	6240455	6241438	984	CNGA4	1367	CD14+ Monocyte	-0.712329	2.70199	13.6173	0.000571521	0.0310871
chr7_106720662_106720907	chr7	106720662	106720907	246	CCDC71L	59504	CD14+ Monocyte	-1.00144	1.3327	13.4794	0.000572017	0.0310871
chr5_143618940_143619592	chr5	143618940	143619592	653	NR3C1	183428	CD14+ Monocyte	-1.33658	0.825237	13.3383	0.000572152	0.0310871
chr11_68583816_68584421	chr11	68583816	68584421	606	PPP6R3	123065	CD14+ Monocyte	1.22155	0.963554	13.3857	0.000572548	0.0310871
chr18_5444369_5445333	chr18	5444369	5445333	965	EPB41L3	76046	CD14+ Monocyte	-0.948839	1.62115	13.4678	0.000572655	0.0310871
chr8_115623027_115624075	chr8	115623027	115624075	1049	TRPS1	43938	CD14+ Monocyte	-1.1069	1.30805	13.4554	0.000572922	0.0310871
chr2_208175245_208175608	chr2	208175245	208175608	364	CRYGA	11656	CD14+ Monocyte	0.639523	3.06487	13.6119	0.000573225	0.0310871
chr2_24878992_24879642	chr2	24878992	24879642	651	ADCY3	7540	CD14+ Monocyte	1.60447	0.613247	13.3132	0.000573278	0.0310871
chr14_96275520_96275943	chr14	96275520	96275943	424	ATG2B	87398	CD14+ Monocyte	1.51294	0.463025	13.1953	0.000575181	0.0311706
chr17_82399987_82401447	chr17	82399987	82401447	1461	HEXD	16899	CD14+ Monocyte	0.574873	3.7046	13.5853	0.000578565	0.0312949
chr11_75369745_75370433	chr11	75369745	75370433	689	ARRB1	18084	CD14+ Monocyte	-0.724401	2.91531	13.5848	0.000579991	0.0313129
chr5_54577445_54578023	chr5	54577445	54578023	579	SNX18	59687	CD14+ Monocyte	-0.955414	1.49637	13.4847	0.000580365	0.0313135
chr1_9131622_9131815	chr1	9131622	9131815	194	GPR157	2520	CD14+ Monocyte	-0.84861	1.74918	13.5351	0.000581272	0.0313428
chr2_229713618_229715408	chr2	229713618	229715408	1791	DNER	853	CD14+ Monocyte	1.14412	1.78403	13.4838	0.000582166	0.0313475
chr1_162922218_162922824	chr1	162922218	162922824	607	HSD17B7	131517	CD14+ Monocyte	-0.937198	1.28544	13.4687	0.000582453	0.0313475
chr19_35213658_35214600	chr19	35213658	35214600	943	FAM187B	14125	CD14+ Monocyte	-0.507215	4.42211	13.5621	0.000583212	0.0313635
chr6_111534191_111534751	chr6	111534191	111534751	561	TRAF3IP2	32528	CD14+ Monocyte	-0.819551	2.5432	13.5697	0.000583745	0.0313635
chr15_38053104_38053600	chr15	38053104	38053600	497	LINC02345	12712	CD14+ Monocyte	-1.54406	0.765749	13.1963	0.000584238	0.0313652
chr2_91475791_91478620	chr2	91475791	91478620	2830	BMS1P14	2729799	CD14+ Monocyte	-1.17089	1.44106	13.436	0.000586071	0.0313842
chr21_41458961_41461190	chr21	41458961	41461190	2230	MX1	26912	CD14+ Monocyte	1.15829	2.8052	13.5512	0.000586229	0.0313842
chr9_79651045_79651887	chr9	79651045	79651887	843	TLE4	77869	CD14+ Monocyte	-0.52738	3.44555	13.5527	0.000586358	0.0313842
chr15_99450986_99451406	chr15	99450986	99451406	421	MEF2A	114010	CD14+ Monocyte	-1.12779	1.88667	13.4967	0.000586416	0.0313842
chr12_63893499_63894842	chr12	63893499	63894842	1344	SRGAP1	48800	CD14+ Monocyte	-0.608767	2.76671	13.5535	0.000587206	0.0313848
chr19_10896386_10897642	chr19	10896386	10897642	1257	CARM1	23958	CD14+ Monocyte	1.04757	1.57951	13.4118	0.000587764	0.0313848
chr9_21964848_21966055	chr9	21964848	21966055	1208	CDKN2A-DT	1083	CD14+ Monocyte	0.584451	3.62686	13.5471	0.000587886	0.0313848
chr12_94111724_94112820	chr12	94111724	94112820	1097	PLXNC1	35756	CD14+ Monocyte	-0.83956	3.14526	13.5395	0.000589966	0.0314756
chr12_45556673_45557521	chr12	45556673	45557521	849	ARID2	172184	CD14+ Monocyte	-0.88374	2.66129	13.5313	0.000593002	0.0315991
chr7_132390626_132391572	chr7	132390626	132391572	947	PLXNA4	184898	CD14+ Monocyte	-1.14506	2.72886	13.5232	0.000594499	0.0316593
chr1_35864791_35865159	chr1	35864791	35865159	369	AGO1	4648	CD14+ Monocyte	-1.01172	1.75964	13.4191	0.000595076	0.031661
chr7_12643453_12644260	chr7	12643453	12644260	808	ARL4A	42566	CD14+ Monocyte	-1.07466	2.68735	13.5172	0.000596572	0.0317014
chr6_7126611_7127207	chr6	7126611	7127207	597	RREB1	18651	CD14+ Monocyte	-0.686483	2.42619	13.5063	0.000596763	0.0317014
chr15_89828555_89828771	chr15	89828555	89828771	217	ANPEP	13703	CD14+ Monocyte	-0.916268	1.4609	13.3966	0.000598066	0.0317314
chr14_50756215_50757214	chr14	50756215	50757214	1000	NIN	73907	CD14+ Monocyte	1.08891	1.96209	13.3648	0.000599893	0.0317892
chr15_69753751_69754476	chr15	69753751	69754476	726	DRAIC	192032	CD14+ Monocyte	-1.17964	2.50606	13.494	0.000601322	0.0318453
chr1_156927471_156928222	chr1	156927471	156928222	752	LRRC71	6840	CD14+ Monocyte	0.696157	2.66441	13.4808	0.000603388	0.0319057
chr7_54813487_54814129	chr7	54813487	54814129	643	SEC61G	54241	CD14+ Monocyte	-1.47879	0.780975	13.2248	0.000603912	0.0319057
chr20_49794558_49795330	chr20	49794558	49795330	773	SLC9A8	17382	CD14+ Monocyte	0.500827	4.20676	13.4628	0.000607982	0.0320795
chr1_151130917_151132468	chr1	151130917	151132468	1552	SEMA6C	14163	CD14+ Monocyte	0.597645	3.12437	13.4541	0.000611811	0.0322461
chr14_69316973_69318664	chr14	69316973	69318664	1692	GALNT16	56816	CD14+ Monocyte	-0.588253	3.59501	13.4489	0.000611889	0.0322461
chr2_12478900_12479298	chr2	12478900	12479298	399	TRIB2	237573	CD14+ Monocyte	-1.75856	0.347541	13.0204	0.000613302	0.0323008
chr12_76611379_76612324	chr12	76611379	76612324	946	OSBPL8	51608	CD14+ Monocyte	-0.823406	2.3349	13.4367	0.00061455	0.0323235
chr1_34867366_34867941	chr1	34867366	34867941	576	SMIM12	7617	CD14+ Monocyte	-1.01105	2.44329	13.4232	0.000614605	0.0323235
chr16_67236368_67237320	chr16	67236368	67237320	953	TMEM208	9239	CD14+ Monocyte	0.83819	2.68081	13.4265	0.000615287	0.0323262
chr9_127561570_127562712	chr9	127561570	127562712	1143	NIBAN2	6361	CD14+ Monocyte	-0.635998	5.30602	13.4304	0.000615775	0.0323321
chr5_55226450_55227694	chr5	55226450	55227694	1245	CDC20B	53273	CD14+ Monocyte	1.0128	1.67517	13.1993	0.000617246	0.0323376
chr2_26486750_26487828	chr2	26486750	26487828	1079	OTOF	8626	CD14+ Monocyte	1.8462	1.33893	13.1777	0.000617447	0.0323376
chr4_56863507_56864184	chr4	56863507	56864184	678	SPINK2	41638	CD14+ Monocyte	-1.55681	0.990344	13.1728	0.000617612	0.0323376
chr15_81293707_81294766	chr15	81293707	81294766	1060	IL16	2203	CD14+ Monocyte	-0.603733	4.04638	13.4237	0.000617973	0.0323376
chr20_37615767_37616230	chr20	37615767	37616230	464	CTNNBL1	77724	CD14+ Monocyte	1.42352	0.610767	13.0779	0.00062011	0.0323376
chr6_152100039_152100755	chr6	152100039	152100755	717	SYNE1	67532	CD14+ Monocyte	-0.885505	2.64629	13.4162	0.00062054	0.0323376
chr3_12954841_12955674	chr3	12954841	12955674	834	IQSEC1	12056	CD14+ Monocyte	-0.658456	3.21808	13.4184	0.000620676	0.0323376
chr8_108136727_108137568	chr8	108136727	108137568	842	RSPO2	53107	CD14+ Monocyte	-0.574568	3.2284	13.413	0.000622107	0.0323376
chr22_46262384_46263257	chr22	46262384	46263257	874	PKDREJ	86	CD14+ Monocyte	0.542478	3.47742	13.4101	0.000622599	0.0323376
chr9_136309044_136309660	chr9	136309044	136309660	617	CCDC187	2143	CD14+ Monocyte	1.2489	0.837675	13.1212	0.000622957	0.0323376
chr1_50332935_50333999	chr1	50332935	50333999	1065	DMRTA2	89444	CD14+ Monocyte	0.682245	2.98827	13.411	0.000623242	0.0323376
chr2_113699988_113700788	chr2	113699988	113700788	801	SLC35F5	55854	CD14+ Monocyte	-0.968652	1.54866	13.3414	0.000624218	0.0323376
chr15_78916835_78917351	chr15	78916835	78917351	517	CTSH	27695	CD14+ Monocyte	-0.617522	2.84609	13.3919	0.000624926	0.0323376
chr3_168248822_168250528	chr3	168248822	168250528	1707	GOLIM4	152898	CD14+ Monocyte	1.20412	2.30562	13.3221	0.000625106	0.0323376
chr19_18262576_18263094	chr19	18262576	18263094	519	IQCN	11358	CD14+ Monocyte	1.00877	1.86691	13.2098	0.000625356	0.0323376
chr8_116444483_116445846	chr8	116444483	116445846	1364	EIF3H	309977	CD14+ Monocyte	-0.755692	2.81591	13.3986	0.000625487	0.0323376
chr6_14865542_14866353	chr6	14865542	14866353	812	JARID2	379715	CD14+ Monocyte	-0.505017	3.94167	13.3943	0.000625648	0.0323376
chr9_74496891_74498777	chr9	74496891	74498777	1887	RORB-AS1	224	CD14+ Monocyte	1.22447	1.71962	13.2852	0.000626239	0.0323486
chrX_1582908_1583376	chrX	1582908	1583376	469	AKAP17A	8227	CD14+ Monocyte	1.23113	1.54572	13.2406	0.00062683	0.0323598
chr3_153069691_153070860	chr3	153069691	153070860	1170	RAP2B	91365	CD14+ Monocyte	-0.749126	2.28384	13.3784	0.000629267	0.0324236
chr2_26469205_26470014	chr2	26469205	26470014	810	OTOF	8110	CD14+ Monocyte	0.809322	1.88007	13.3153	0.000630294	0.0324236
chr13_51258859_51260014	chr13	51258859	51260014	1156	FAM124A	36462	CD14+ Monocyte	-0.837382	2.40702	13.3801	0.00063035	0.0324236
chr14_50008767_50009408	chr14	50008767	50009408	642	LINC01588	1247	CD14+ Monocyte	-0.988839	1.14767	13.0407	0.000631891	0.0324236
chr15_90738440_90739436	chr15	90738440	90739436	997	BLM	21095	CD14+ Monocyte	-0.625413	3.69913	13.3716	0.000631987	0.0324236
chr16_9061199_9061867	chr16	9061199	9061867	669	C16orf72	29776	CD14+ Monocyte	-0.775099	2.67463	13.3778	0.000632141	0.0324236
chr8_66121325_66121800	chr8	66121325	66121800	476	TRIM55	5328	CD14+ Monocyte	-0.682235	3.35479	13.3728	0.000632301	0.0324236
chr5_115815557_115817017	chr5	115815557	115817017	1461	CDO1	358	CD14+ Monocyte	1.19018	1.59738	13.2313	0.000632334	0.0324236
chr22_20430517_20431589	chr22	20430517	20431589	1073	SCARF2	6236	CD14+ Monocyte	0.568954	3.78266	13.3719	0.000632338	0.0324236
chr12_78418965_78419317	chr12	78418965	78419317	353	SYT1	444664	CD14+ Monocyte	-1.15158	0.656716	13.0701	0.000632399	0.0324236
chr2_43366823_43367305	chr2	43366823	43367305	483	LINC01126	139613	CD14+ Monocyte	-0.873111	1.53324	13.3098	0.000633939	0.0324339
chr8_100333806_100336815	chr8	100333806	100336815	3010	RNF19A	611	CD14+ Monocyte	0.939133	2.36481	13.3298	0.000634467	0.0324339
chr1_9825302_9825966	chr1	9825302	9825966	665	CLSTN1	776	CD14+ Monocyte	-0.696068	3.10148	13.3656	0.000634673	0.0324339
chr5_109654398_109655008	chr5	109654398	109655008	611	MAN2A1	34357	CD14+ Monocyte	-0.778493	3.15224	13.3639	0.000635439	0.0324397
chr6_90087917_90088507	chr6	90087917	90088507	591	GJA10	193449	CD14+ Monocyte	-0.742082	2.92455	13.3642	0.000635608	0.0324397
chr2_20821928_20823565	chr2	20821928	20823565	1638	LDAH	435	CD14+ Monocyte	0.637968	3.34156	13.3598	0.000635918	0.0324397
chr1_234515687_234516003	chr1	234515687	234516003	317	LINC01354	15776	CD14+ Monocyte	-1.1004	1.28426	13.0638	0.000637753	0.0324823
chr8_94961669_94962436	chr8	94961669	94962436	768	NDUFAF6	12110	CD14+ Monocyte	-1.11909	1.30238	13.1939	0.00063783	0.0324823
chr19_17671822_17672416	chr19	17671822	17672416	595	UNC13A	15783	CD14+ Monocyte	1.23634	1.03873	13.092	0.000639762	0.0325316
chr1_23657484_23658107	chr1	23657484	23658107	624	MDS2	30151	CD14+ Monocyte	0.873633	1.37872	13.2141	0.000640862	0.0325316
chr3_48769626_48770795	chr3	48769626	48770795	1170	IP6K2	52348	CD14+ Monocyte	-0.679374	3.1688	13.3389	0.00064121	0.0325316
chr4_138327991_138328497	chr4	138327991	138328497	507	LINC00499	18281	CD14+ Monocyte	-1.24912	0.936648	13.0843	0.000651441	0.0329581
chr14_68757501_68758294	chr14	68757501	68758294	794	ZFP36L1	34773	CD14+ Monocyte	-0.567048	4.69803	13.2926	0.000652262	0.0329803
chr12_89135840_89136534	chr12	89135840	89136534	695	LINC02458	116148	CD14+ Monocyte	-1.0188	1.97575	13.2741	0.000653406	0.0330073
chr12_112828313_112829040	chr12	112828313	112829040	728	RPH3A	36566	CD14+ Monocyte	0.997482	1.38943	13.1293	0.000653564	0.0330073
chr1_53892743_53893407	chr1	53892743	53893407	665	DIO1	779	CD14+ Monocyte	-0.555535	3.9372	13.2871	0.000654194	0.0330158
chr3_5463832_5464515	chr3	5463832	5464515	684	EDEM1	276126	CD14+ Monocyte	-0.584751	3.23351	13.277	0.000658115	0.0331205
chr8_9897964_9899780	chr8	9897964	9899780	1817	MSRA	154511	CD14+ Monocyte	1.36158	3.25349	13.2702	0.000658569	0.033124
chr17_1203255_1203921	chr17	1203255	1203921	667	ABR	15983	CD14+ Monocyte	0.539194	4.36695	13.2668	0.00065958	0.0331471
chr19_11478553_11479770	chr19	11478553	11479770	1218	ELAVL3	1276	CD14+ Monocyte	0.611548	3.10221	13.2725	0.000659798	0.0331471
chr10_47160635_47161446	chr10	47160635	47161446	812	GDF10	138750	CD14+ Monocyte	-0.613292	3.3345	13.2633	0.000661739	0.0332058
chr12_121018213_121018554	chr12	121018213	121018554	342	C12orf43	1726	CD14+ Monocyte	0.982247	2.77977	13.2321	0.000662439	0.0332215
chr6_137297725_137298555	chr6	137297725	137298555	831	IFNGR1	78340	CD14+ Monocyte	-0.821105	2.20647	13.2443	0.000662911	0.0332259
chr1_77350226_77350790	chr1	77350226	77350790	565	AK5	67140	CD14+ Monocyte	-1.35321	0.912733	13.0378	0.000664601	0.0332617
chr4_83320381_83321102	chr4	83320381	83321102	722	HPSE	13711	CD14+ Monocyte	-0.624768	4.31527	13.2472	0.000665025	0.0332617
chr22_40965675_40967502	chr22	40965675	40967502	1828	RBX1	14298	CD14+ Monocyte	0.689281	3.74196	13.2483	0.000665778	0.0332617
chr3_115019802_115020351	chr3	115019802	115020351	550	ZBTB20	51063	CD14+ Monocyte	-1.01736	1.12726	13.1149	0.000665946	0.0332617
chr1_28714163_28715639	chr1	28714163	28715639	1477	YTHDF2	20981	CD14+ Monocyte	0.637203	2.78484	13.2438	0.000666927	0.0332914
chr21_34362922_34363499	chr21	34362922	34363499	578	KCNE2	506	CD14+ Monocyte	1.1303	1.11008	12.9681	0.000668131	0.0333322
chr10_86439353_86440240	chr10	86439353	86440240	888	WAPL	81544	CD14+ Monocyte	-0.644054	3.28114	13.2323	0.000670434	0.0333822
chr5_181160368_181161550	chr5	181160368	181161550	1183	OR2V2	5426	CD14+ Monocyte	1.03231	2.03711	13.1454	0.000670736	0.0333822
chr18_335660_337352	chr18	335660	337352	1693	THOC1	67613	CD14+ Monocyte	-0.83593	2.79978	13.2337	0.000671409	0.0333822
chr15_72249233_72250154	chr15	72249233	72250154	922	PKM	17609	CD14+ Monocyte	-0.842853	1.69534	13.1994	0.000671461	0.0333822
chr11_65487287_65488249	chr11	65487287	65488249	963	MALAT1	9488	CD14+ Monocyte	-0.543564	4.65303	13.2214	0.000672033	0.0333914
chr2_236704964_236706128	chr2	236704964	236706128	1165	ACKR3	135140	CD14+ Monocyte	-0.704502	2.75272	13.2257	0.000673153	0.0334277
chr8_143953423_143953881	chr8	143953423	143953881	459	PLEC	47	CD14+ Monocyte	0.537179	3.53271	13.2176	0.000673934	0.0334472
chr17_77273492_77275022	chr17	77273492	77275022	1531	SEPTIN9	6476	CD14+ Monocyte	1.10471	2.74662	13.1746	0.000675838	0.0334803
chr14_95522566_95522842	chr14	95522566	95522842	277	SYNE3	5916	CD14+ Monocyte	-0.796643	2.1444	13.1849	0.000675861	0.0334803
chr2_26401445_26402487	chr2	26401445	26402487	1043	DRC1	474	CD14+ Monocyte	0.876211	2.32156	13.1665	0.000676119	0.0334803
chr17_39014950_39015741	chr17	39014950	39015741	792	LINC00672	89783	CD14+ Monocyte	0.652267	2.92008	13.2115	0.000676214	0.0334803
chr10_124577178_124579457	chr10	124577178	124579457	2280	LHPP	115356	CD14+ Monocyte	1.14599	1.48145	13.0749	0.000676547	0.0334803
chr4_139740181_139741304	chr4	139740181	139741304	1124	MGST2	74363	CD14+ Monocyte	-0.61323	3.24772	13.2093	0.000677196	0.0334932
chr15_79009380_79009828	chr15	79009380	79009828	449	RASGRF1	3720	CD14+ Monocyte	-0.976765	1.15488	13.0567	0.000680421	0.033614
chr17_15954256_15954495	chr17	15954256	15954495	240	ADORA2B	9340	CD14+ Monocyte	-1.35168	1.03993	12.949	0.000681106	0.0336286
chr19_40639062_40639873	chr19	40639062	40639873	812	LTBP4	37694	CD14+ Monocyte	1.53963	0.919858	12.8662	0.000681883	0.0336476
chr3_188272315_188273296	chr3	188272315	188273296	982	LPP	59420	CD14+ Monocyte	-1.06413	1.11225	12.9751	0.000683616	0.0336996
chr1_53554040_53555038	chr1	53554040	53555038	999	LINC01771	225808	CD14+ Monocyte	1.7936	0.576519	12.8867	0.000684591	0.0337233
chr6_53592873_53594134	chr6	53592873	53594134	1262	GCLC	47772	CD14+ Monocyte	-0.782014	2.39309	13.1795	0.000685683	0.0337514
chr8_128127529_128128259	chr8	128127529	128128259	731	PVT1	332997	CD14+ Monocyte	-1.1455	1.46271	13.104	0.000685947	0.0337514
chr10_63712444_63713305	chr10	63712444	63713305	862	JMJD1C	190554	CD14+ Monocyte	-0.978539	1.70111	13.0967	0.000686639	0.0337531
chr22_49999241_50000434	chr22	49999241	50000434	1194	PIM3	38470	CD14+ Monocyte	0.795745	2.69347	13.1517	0.000686765	0.0337531
chr2_37394241_37394633	chr2	37394241	37394633	393	QPCT	49612	CD14+ Monocyte	-1.08569	2.31885	13.1778	0.000687538	0.0337718
chr22_24466699_24467512	chr22	24466699	24467512	814	ADORA2A-AS1	27562	CD14+ Monocyte	-0.808646	2.06006	13.1505	0.00068799	0.0337747
chr6_11824936_11825465	chr6	11824936	11825465	530	ADTRP	45889	CD14+ Monocyte	1.20822	0.781712	12.8261	0.000689099	0.0337925
chr16_72848482_72849116	chr16	72848482	72849116	635	LINC01572	183512	CD14+ Monocyte	-0.965525	1.61397	13.0425	0.000689923	0.0337925
chr18_26547570_26550650	chr18	26547570	26550650	3081	KCTD1	836	CD14+ Monocyte	0.64811	3.16985	13.157	0.00069229	0.0338509
chr2_11907128_11907802	chr2	11907128	11907802	675	MIR3681HG	99313	CD14+ Monocyte	-0.506265	3.46861	13.1495	0.000693624	0.0338663
chr11_69497412_69500452	chr11	69497412	69500452	3041	CCND1	140703	CD14+ Monocyte	0.90696	1.64304	13.0249	0.000693689	0.0338663
chr15_90064862_90065488	chr15	90064862	90065488	627	ZNF710-AS1	16719	CD14+ Monocyte	-0.655669	3.06003	13.1478	0.000693791	0.0338663
chr21_43778804_43779288	chr21	43778804	43779288	485	CSTB	2496	CD14+ Monocyte	-0.79673	3.0482	13.1509	0.000694626	0.0338878
chr11_73157094_73158148	chr11	73157094	73158148	1055	FCHSD2	14776	CD14+ Monocyte	0.524065	3.16099	13.1363	0.000698563	0.0339762
chr8_52463972_52464616	chr8	52463972	52464616	645	ST18	54093	CD14+ Monocyte	-1.01083	1.88117	13.0844	0.000699482	0.0339762
chr14_60721293_60724483	chr14	60721293	60724483	3191	SIX4	132	CD14+ Monocyte	0.756578	2.6242	13.1287	0.000700225	0.0339762
chr4_184354927_184355755	chr4	184354927	184355755	829	LINC02363	950	CD14+ Monocyte	-0.552783	4.17207	13.1236	0.000700382	0.0339762
chrX_19085738_19086840	chrX	19085738	19086840	1103	ADGRG2	35628	CD14+ Monocyte	0.985566	2.78956	13.1165	0.000700579	0.0339762
chr16_29853762_29856136	chr16	29853762	29856136	2375	CDIPT	7090	CD14+ Monocyte	1.04489	1.4001	12.9506	0.000701102	0.0339762
chr1_221809378_221810527	chr1	221809378	221810527	1150	LINC01655	30139	CD14+ Monocyte	-0.641244	2.11176	13.1245	0.000701569	0.0339762
chr5_96633586_96634421	chr5	96633586	96634421	836	CAST	27615	CD14+ Monocyte	-0.666802	2.35637	13.1172	0.000702381	0.0339938
chr5_163943279_163943943	chr5	163943279	163943943	665	MAT2B	437661	CD14+ Monocyte	-0.629723	3.80178	13.116	0.000702724	0.0339938
chr19_11211874_11213742	chr19	11211874	11213742	1869	KANK2	14009	CD14+ Monocyte	0.963601	2.14788	12.9855	0.000705059	0.0340876
chr1_180151001_180151311	chr1	180151001	180151311	311	QSOX1	3521	CD14+ Monocyte	-0.610233	3.12769	13.1092	0.000705666	0.0340978
chr16_11311751_11312185	chr16	11311751	11312185	435	RMI2	33252	CD14+ Monocyte	0.732936	3.54054	13.1049	0.000707203	0.0341115
chr8_47627548_47628288	chr8	47627548	47628288	741	SPIDR	25799	CD14+ Monocyte	-0.508038	4.87691	13.0987	0.000707294	0.0341115
chr1_192907636_192908645	chr1	192907636	192908645	1010	RGS2	98598	CD14+ Monocyte	-0.507736	3.5878	13.1008	0.000707536	0.0341115
chr3_120907892_120908686	chr3	120907892	120908686	795	GTF2E1	165149	CD14+ Monocyte	1.13533	1.42247	12.9515	0.000711519	0.0342232
chr16_21116154_21116814	chr16	21116154	21116814	661	DNAH3	34032	CD14+ Monocyte	1.09406	1.79268	12.9881	0.000712051	0.0342232
chr1_31181353_31182882	chr1	31181353	31182882	1530	NKAIN1	57005	CD14+ Monocyte	0.587817	3.45715	13.0842	0.000713263	0.0342533
chr2_43455498_43456726	chr2	43455498	43456726	1229	THADA	139248	CD14+ Monocyte	-0.779219	2.74482	13.0849	0.00071432	0.034285
chr6_27823757_27825107	chr6	27823757	27825107	1351	OR2B6	132133	CD14+ Monocyte	0.650698	3.49402	13.0745	0.000716498	0.0343616
chr8_47522243_47522613	chr8	47522243	47522613	371	SPIDR	131474	CD14+ Monocyte	-0.753516	2.48212	13.0687	0.000716796	0.0343616
chr6_89007591_89008723	chr6	89007591	89008723	1133	RNGTT	43973	CD14+ Monocyte	-0.602538	2.92595	13.0725	0.000717114	0.0343616
chr16_20691466_20691988	chr16	20691466	20691988	523	ACSM1	210	CD14+ Monocyte	-1.17431	1.71514	12.9781	0.000719538	0.0344066
chr13_20337804_20338517	chr13	20337804	20338517	714	GJB6	105409	CD14+ Monocyte	-0.514209	3.66364	13.0592	0.000719653	0.0344066
chr22_29225102_29226110	chr22	29225102	29226110	1009	EMID1	19207	CD14+ Monocyte	1.04229	1.0202	12.8339	0.000721458	0.0344737
chr14_23572114_23573478	chr14	23572114	23573478	1365	AP1G2	4323	CD14+ Monocyte	-0.50234	4.25078	13.0455	0.000723548	0.0344959
chr12_89857597_89858319	chr12	89857597	89858319	723	LINC02399	89373	CD14+ Monocyte	-0.747776	2.51953	13.0519	0.000724044	0.0344959
chr3_194323862_194324735	chr3	194323862	194324735	874	LINC00887	11058	CD14+ Monocyte	0.773212	2.83	13.0499	0.000724369	0.0344959
chr2_172437555_172438362	chr2	172437555	172438362	808	ITGA6	9970	CD14+ Monocyte	-0.8533	2.6115	13.0489	0.000724936	0.0344959
chr11_70323731_70324641	chr11	70323731	70324641	911	PPFIA1	53042	CD14+ Monocyte	-0.52731	3.89306	13.0413	0.000725274	0.0344959
chr5_172450996_172452022	chr5	172450996	172452022	1027	SH3PXD2B	2501	CD14+ Monocyte	0.710812	2.16942	13.0275	0.000725661	0.0344959
chr1_206930163_206930732	chr1	206930163	206930732	570	FCMR	8222	CD14+ Monocyte	-0.609667	3.12375	13.0446	0.000725742	0.0344959
chr17_19369775_19371179	chr17	19369775	19371179	1405	MAPK7	6541	CD14+ Monocyte	-0.504213	4.73151	13.0363	0.000726127	0.0344959
chr22_38718537_38718857	chr22	38718537	38718857	321	GTPBP1	12594	CD14+ Monocyte	-1.20074	0.851466	12.6935	0.000726384	0.0344959
chr9_7935293_7936574	chr9	7935293	7936574	1282	DMAC1	135515	CD14+ Monocyte	-0.823309	2.70868	13.0385	0.000727472	0.0344959
chr12_108730367_108730702	chr12	108730367	108730702	336	CORO1C	141	CD14+ Monocyte	-0.53671	3.61565	13.0341	0.000728204	0.0344959
chr1_235745457_235746713	chr1	235745457	235746713	1257	GNG4	94703	CD14+ Monocyte	1.1198	1.48499	12.8738	0.000728334	0.0344959
chr10_19638197_19639319	chr10	19638197	19639319	1123	PLXDC2	177112	CD14+ Monocyte	-0.544159	3.47576	13.0292	0.000729352	0.0345251
chr8_129665720_129667612	chr8	129665720	129667612	1893	CCDC26	12627	CD14+ Monocyte	-0.534274	2.94587	13.0308	0.00073032	0.034538
chr8_85235619_85236327	chr8	85235619	85236327	709	CA13	9130	CD14+ Monocyte	-1.0158	1.62216	12.9936	0.000730427	0.034538
chr2_119283858_119284576	chr2	119283858	119284576	719	STEAP3-AS1	34787	CD14+ Monocyte	-0.913697	3.43989	13.0175	0.000733233	0.0345972
chr3_72593627_72595035	chr3	72593627	72595035	1409	RYBP	147004	CD14+ Monocyte	-0.645409	3.12002	13.0146	0.000734685	0.0345972
chr15_93257875_93259407	chr15	93257875	93259407	1533	RGMA	168664	CD14+ Monocyte	-1.08585	1.40847	12.8885	0.000734828	0.0345972
chr2_145742898_145743563	chr2	145742898	145743563	666	TEX41	1074932	CD14+ Monocyte	-0.646325	2.53092	13.0093	0.000734896	0.0345972
chr18_48832873_48833315	chr18	48832873	48833315	443	SMAD7	109492	CD14+ Monocyte	-0.723953	2.35075	13.0054	0.00073556	0.0346095
chr8_20125039_20125835	chr8	20125039	20125835	797	SLC18A1	57301	CD14+ Monocyte	-0.775275	2.34143	13.0116	0.000736068	0.0346145
chr11_78312642_78314849	chr11	78312642	78314849	2208	GAB2	27031	CD14+ Monocyte	-0.592495	3.46693	13.0066	0.000736639	0.0346224
chr22_37579883_37580626	chr22	37579883	37580626	744	LGALS2	204	CD14+ Monocyte	-0.760534	3.19024	12.9961	0.000740612	0.0347195
chr13_23146462_23147827	chr13	23146462	23147827	1366	SACS	227681	CD14+ Monocyte	-0.508516	3.82797	12.9791	0.000744306	0.0348318
chr2_236715002_236715870	chr2	236715002	236715870	869	ACKR3	145178	CD14+ Monocyte	-0.689916	2.75193	12.986	0.000744658	0.0348318
chr6_87824790_87826408	chr6	87824790	87826408	1619	AKIRIN2	122557	CD14+ Monocyte	-0.574467	3.64056	12.9787	0.000744736	0.0348318
chr1_78622585_78623147	chr1	78622585	78623147	563	IFI44L	2138	CD14+ Monocyte	1.4876	1.16771	12.7177	0.000746443	0.0348791
chr5_115475719_115476241	chr5	115475719	115476241	523	FEM1C	68534	CD14+ Monocyte	-1.54056	0.747413	12.7247	0.000746557	0.0348791
chr4_107843459_107843735	chr4	107843459	107843735	277	SGMS2	18528	CD14+ Monocyte	-1.36302	1.0944	12.7729	0.000748051	0.0349299
chr14_20881126_20881795	chr14	20881126	20881795	670	RNASE3	9607	CD14+ Monocyte	0.890872	1.66132	12.8884	0.000751926	0.0350469
chr22_26294394_26294979	chr22	26294394	26294979	586	SEZ6L	124921	CD14+ Monocyte	2.11122	0.663816	12.6396	0.000752195	0.0350469
chr16_79269459_79270014	chr16	79269459	79270014	556	MAF	330723	CD14+ Monocyte	-1.27952	0.975191	12.8081	0.000753688	0.0350599
chr6_28917125_28918135	chr6	28917125	28918135	1011	TRIM27	5850	CD14+ Monocyte	0.663566	3.51423	12.9494	0.000755036	0.0350847
chr17_64174595_64175593	chr17	64174595	64175593	999	SNHG25	28626	CD14+ Monocyte	-0.540667	5.19115	12.9414	0.000755494	0.0350871
chr6_44231425_44231827	chr6	44231425	44231827	403	SLC29A1	7831	CD14+ Monocyte	1.00097	1.40809	12.7629	0.000756091	0.0350959
chr8_124140698_124141893	chr8	124140698	124141893	1196	TMEM65	230806	CD14+ Monocyte	-0.795683	2.23243	12.9473	0.000756919	0.0351153
chr6_170036559_170037258	chr6	170036559	170037258	700	LINC01624	235215	CD14+ Monocyte	-1.23141	1.09731	12.7716	0.000762824	0.0353182
chr13_51548860_51549631	chr13	51548860	51549631	772	WDFY2	34830	CD14+ Monocyte	-0.595568	3.42396	12.9208	0.000763372	0.0353182
chr1_247457023_247457739	chr1	247457023	247457739	717	OR2B11	5041	CD14+ Monocyte	-0.741003	2.84822	12.9228	0.000763641	0.0353182
chr19_3450841_3451573	chr19	3450841	3451573	733	SMIM24	28952	CD14+ Monocyte	1.11986	1.62409	12.6803	0.000763755	0.0353182
chr14_56008186_56008757	chr14	56008186	56008757	572	PELI2	109653	CD14+ Monocyte	-0.918409	1.84167	12.8848	0.000764837	0.0353493
chr14_68734148_68734755	chr14	68734148	68734755	608	ZFP36L1	58312	CD14+ Monocyte	-0.655239	3.84778	12.9094	0.000766609	0.0354101
chr3_154795619_154795999	chr3	154795619	154795999	381	MME	228124	CD14+ Monocyte	-0.956683	1.63062	12.8499	0.000767007	0.0354101
chr3_156317343_156317885	chr3	156317343	156317885	543	KCNAB1	26307	CD14+ Monocyte	-1.02216	1.2369	12.8122	0.000767387	0.0354101
chr8_142234859_142235346	chr8	142234859	142235346	488	LINC00051	36504	CD14+ Monocyte	2.46575	0.817219	12.6036	0.000768114	0.0354246
chr3_30221384_30221933	chr3	30221384	30221933	550	LINC01985	296934	CD14+ Monocyte	-0.780749	2.22039	12.9001	0.000769794	0.0354496
chr17_80284588_80285948	chr17	80284588	80285948	1361	RNF213	23737	CD14+ Monocyte	1.20911	1.7805	12.7344	0.000770387	0.0354496
chr4_74327706_74328465	chr4	74327706	74328465	760	EPGN	19237	CD14+ Monocyte	-1.52707	1.16509	12.6622	0.000770568	0.0354496
chr19_16083403_16083735	chr19	16083403	16083735	333	TPM4	6388	CD14+ Monocyte	0.646032	3.48985	12.9006	0.000770715	0.0354496
chr1_59318380_59319272	chr1	59318380	59319272	893	FGGY	8349	CD14+ Monocyte	-1.31842	1.75943	12.8548	0.000772363	0.0354787
chrX_96423812_96425535	chrX	96423812	96425535	1724	DIAPH2	259127	CD14+ Monocyte	-0.707823	2.4614	12.896	0.000772585	0.0354787
chr16_11834079_11835390	chr16	11834079	11835390	1312	BCAR4	5247	CD14+ Monocyte	0.905225	2.03496	12.8322	0.000775121	0.0355383
chr21_41425758_41427175	chr21	41425758	41427175	1418	MX1	272	CD14+ Monocyte	0.570266	4.56739	12.8675	0.000779618	0.0356385
chr2_172692932_172694301	chr2	172692932	172694301	1370	RAPGEF4	41543	CD14+ Monocyte	-0.746149	3.40519	12.8704	0.000779858	0.0356385
chr11_13745143_13745621	chr11	13745143	13745621	479	LINC02548	38764	CD14+ Monocyte	-1.19	1.03145	12.745	0.000781222	0.0356501
chr6_15881071_15881726	chr6	15881071	15881726	656	DTNBP1	218013	CD14+ Monocyte	-0.80544	2.83011	12.8693	0.000781289	0.0356501
chr19_14943346_14944171	chr19	14943346	14944171	826	SLC1A6	35693	CD14+ Monocyte	-0.680179	3.4195	12.863	0.000782168	0.0356713
chr20_60030722_60031334	chr20	60030722	60031334	613	C20orf197	24590	CD14+ Monocyte	-1.13995	0.955823	12.6902	0.000784369	0.0357166
chr5_134122111_134123377	chr5	134122111	134123377	1267	TCF7	240	CD14+ Monocyte	1.06972	1.15896	12.6809	0.000784763	0.0357166
chr18_8966594_8967411	chr18	8966594	8967411	818	NDUFV2	135287	CD14+ Monocyte	-0.902442	1.87136	12.8358	0.000785436	0.0357219
chr9_116504796_116505350	chr9	116504796	116505350	555	ASTN2	181865	CD14+ Monocyte	-1.28242	1.29216	12.7754	0.000785768	0.0357219
chr2_200578620_200579258	chr2	200578620	200579258	639	AOX1	6755	CD14+ Monocyte	1.29834	0.835099	12.6197	0.000787004	0.0357404
chr2_236970121_236970447	chr2	236970121	236970447	327	COPS8	114993	CD14+ Monocyte	-0.854249	1.10937	12.6556	0.000788516	0.0357898
chr17_80023132_80025478	chr17	80023132	80025478	2347	TBC1D16	10394	CD14+ Monocyte	1.26779	1.58329	12.7532	0.000788924	0.0357898
chr17_2547056_2547696	chr17	2547056	2547696	641	METTL16	35168	CD14+ Monocyte	1.90941	0.790433	12.5619	0.000790538	0.0358014
chr1_178283060_178284518	chr1	178283060	178284518	1459	RASAL2	56932	CD14+ Monocyte	-0.672181	2.96914	12.8303	0.00079409	0.0359106
chr15_34335248_34335645	chr15	34335248	34335645	398	SLC12A6	1199	CD14+ Monocyte	-0.570875	3.10312	12.8271	0.00079483	0.0359194
chr6_20463107_20464751	chr6	20463107	20464751	1645	E2F3	59429	CD14+ Monocyte	0.694946	2.46808	12.8054	0.00079512	0.0359194
chr4_158161401_158162229	chr4	158161401	158162229	829	FAM198B-AS1	8522	CD14+ Monocyte	-0.696363	3.75273	12.8185	0.000796569	0.0359471
chr11_72673230_72676029	chr11	72673230	72676029	2800	PDE2A	1192	CD14+ Monocyte	0.554501	3.81844	12.8171	0.000797517	0.0359522
chr8_47360290_47360943	chr8	47360290	47360943	654	SPIDR	99353	CD14+ Monocyte	-0.668347	3.46499	12.8111	0.000799846	0.0359589
chrX_131704072_131705327	chrX	131704072	131705327	1256	FIRRE	125316	CD14+ Monocyte	0.647362	2.28545	12.2927	0.000801577	0.0359719
chr10_120760025_120760960	chr10	120760025	120760960	936	WDR11-AS1	90219	CD14+ Monocyte	-0.961221	1.80391	12.7847	0.000801715	0.0359719
chr11_46916529_46918657	chr11	46916529	46918657	2129	LRP4	107	CD14+ Monocyte	0.61473	3.09984	12.8021	0.000802531	0.0359897
chr7_105806358_105807172	chr7	105806358	105807172	815	ATXN7L1	69413	CD14+ Monocyte	-0.723072	3.16787	12.7945	0.000805549	0.0360499
chr19_19549049_19550072	chr19	19549049	19550072	1024	CILP2	10785	CD14+ Monocyte	1.06766	1.84694	12.6913	0.000807775	0.0361307
chr18_48855628_48856230	chr18	48855628	48856230	603	SMAD7	86577	CD14+ Monocyte	-1.48609	0.995242	12.4735	0.000809062	0.0361423
chr5_145981799_145982231	chr5	145981799	145982231	433	SH3RF2	45222	CD14+ Monocyte	-1.34779	0.811985	12.5095	0.000809555	0.0361423
chr8_8625522_8626340	chr8	8625522	8626340	819	CLDN23	75596	CD14+ Monocyte	-1.01935	2.14679	12.7753	0.000809715	0.0361423
chr9_112887259_112887991	chr9	112887259	112887991	733	SLC46A2	2885	CD14+ Monocyte	-0.587334	3.0442	12.772	0.00081251	0.0362295
chr9_84301604_84302546	chr9	84301604	84302546	943	SLC28A3	38212	CD14+ Monocyte	-0.816183	2.25466	12.748	0.000815298	0.036335
chr10_110413615_110415152	chr10	110413615	110415152	1538	DUSP5	82754	CD14+ Monocyte	-0.77427	3.90526	12.7608	0.000815971	0.0363462
chr7_44036401_44036653	chr7	44036401	44036653	253	LINC00957	2395	CD14+ Monocyte	0.693803	2.62145	12.7543	0.000819269	0.0364478
chr3_12169793_12170955	chr3	12169793	12170955	1163	TIMP4	10881	CD14+ Monocyte	-0.581344	3.54039	12.7512	0.000819863	0.0364478
chr1_35707198_35709644	chr1	35707198	35709644	2447	C1orf216	7267	CD14+ Monocyte	0.992744	2.0143	12.6844	0.000819947	0.0364478
chr17_63961305_63962351	chr17	63961305	63962351	1047	SCN4A	10567	CD14+ Monocyte	0.519748	4.71718	12.7448	0.000820805	0.036452
chr13_114122755_114123744	chr13	114122755	114123744	990	RASA3	8879	CD14+ Monocyte	-1.15854	2.15108	12.6863	0.000820889	0.036452
chr8_143038568_143039538	chr8	143038568	143039538	971	C8orf31	330	CD14+ Monocyte	1.31239	2.53422	12.6657	0.000822264	0.0364754
chr17_31537578_31538787	chr17	31537578	31538787	1210	RAB11FIP4	49471	CD14+ Monocyte	1.54156	0.736046	12.4418	0.000825382	0.0365384
chr8_98293212_98294596	chr8	98293212	98294596	1385	NIPAL2	361	CD14+ Monocyte	0.696165	3.92004	12.7326	0.000825899	0.0365425
chr6_108874517_108875513	chr6	108874517	108875513	997	ARMC2	26096	CD14+ Monocyte	-0.539036	3.52003	12.7279	0.000828016	0.0366174
chr7_85186228_85187470	chr7	85186228	85187470	1243	SEMA3D	414	CD14+ Monocyte	1.13709	1.60722	12.5819	0.000830481	0.0366813
chr14_83988261_83988685	chr14	83988261	83988685	425	LINC02301	1345630	CD14+ Monocyte	-1.89557	0.687193	12.3966	0.000833929	0.0367467
chr11_32823543_32824166	chr11	32823543	32824166	624	PRRG4	5760	CD14+ Monocyte	0.856877	1.93497	12.6008	0.000835885	0.036814
chr2_231613605_231614403	chr2	231613605	231614403	799	NMUR1	83160	CD14+ Monocyte	0.69268	3.61404	12.7012	0.000837652	0.036873
chr3_43498939_43499701	chr3	43498939	43499701	763	ANO10	122225	CD14+ Monocyte	-0.880672	1.98458	12.6833	0.000838685	0.0368996
chr1_156961818_156962080	chr1	156961818	156962080	263	LRRC71	41187	CD14+ Monocyte	0.93886	0.854658	12.45	0.00084074	0.0369522
chr1_206921643_206922367	chr1	206921643	206922367	725	FCMR	298	CD14+ Monocyte	-0.520961	3.35402	12.6913	0.000841246	0.0369527
chr3_177220744_177222186	chr3	177220744	177222186	1443	TBL1XR1	23262	CD14+ Monocyte	-0.754655	3.06965	12.6905	0.000841913	0.0369527
chr22_24286268_24286876	chr22	24286268	24286876	609	SPECC1L	15438	CD14+ Monocyte	-0.970104	1.25429	12.5254	0.000846521	0.0371274
chr7_95549798_95550482	chr7	95549798	95550482	685	PDK4	46034	CD14+ Monocyte	-2.02065	0.704134	12.3067	0.000847057	0.0371274
chr13_80038975_80039295	chr13	80038975	80039295	321	SPRY2	300364	CD14+ Monocyte	-0.998969	1.41241	12.5837	0.000847571	0.0371274
chr19_861852_863157	chr19	861852	863157	1306	CFD	2189	CD14+ Monocyte	0.600599	5.38614	12.6672	0.000848044	0.0371274
chr2_165897354_165898654	chr2	165897354	165898654	1301	TTC21B-AS1	35202	CD14+ Monocyte	-0.656481	3.11159	12.6739	0.000848367	0.0371274
chr20_62366698_62368478	chr20	62366698	62368478	1781	LAMA5	614	CD14+ Monocyte	0.742718	2.66985	12.6607	0.000848609	0.0371274
chr3_194497600_194498321	chr3	194497600	194498321	722	LINC00884	10461	CD14+ Monocyte	-1.01617	1.46428	12.5882	0.000850225	0.0371328
chr2_173043230_173044086	chr2	173043230	173044086	857	MAP3K20	31759	CD14+ Monocyte	-0.527973	4.339	12.6587	0.000851417	0.037137
chr17_69175602_69176704	chr17	69175602	69176704	1103	ABCA6	33707	CD14+ Monocyte	-0.548405	3.78617	12.6554	0.000852961	0.0371855
chr7_36746178_36746735	chr7	36746178	36746735	558	AOAH	21629	CD14+ Monocyte	-0.680074	2.78572	12.6502	0.000854375	0.0372283
chr16_56356250_56358444	chr16	56356250	56358444	2195	AMFR	66545	CD14+ Monocyte	0.595391	3.30441	12.6526	0.000855777	0.0372411
chr4_2834199_2835530	chr4	2834199	2835530	1332	ADD1	8313	CD14+ Monocyte	0.891885	2.43168	12.6357	0.000855827	0.0372411
chr16_84597514_84597970	chr16	84597514	84597970	457	COTL1	20108	CD14+ Monocyte	-0.63262	3.12578	12.6457	0.000855969	0.0372411
chr12_48216481_48217260	chr12	48216481	48217260	780	OR10AD1	13189	CD14+ Monocyte	-0.661987	2.68855	12.6481	0.000856764	0.0372569
chr17_42251225_42251549	chr17	42251225	42251549	325	STAT5B	24842	CD14+ Monocyte	0.759606	1.8582	12.5603	0.000859258	0.0373036
chr1_40438343_40438860	chr1	40438343	40438860	518	ZFP69B	11203	CD14+ Monocyte	0.968985	1.3502	12.5314	0.000860391	0.0373036
chr12_91871290_91872357	chr12	91871290	91872357	1068	LINC01619	269356	CD14+ Monocyte	-0.557219	3.66667	12.6354	0.000860439	0.0373036
chr2_128168356_128168899	chr2	128168356	128168899	544	UGGT1	77157	CD14+ Monocyte	-0.726493	2.21866	12.5775	0.000875981	0.0378332
chr21_46621594_46622983	chr21	46621594	46622983	1390	PRMT2	12611	CD14+ Monocyte	-0.606809	3.72988	12.5937	0.0008761	0.0378332
chr13_30745903_30746501	chr13	30745903	30746501	599	ALOX5AP	10361	CD14+ Monocyte	-0.601082	3.09487	12.5983	0.00087623	0.0378332
chr10_58256010_58256707	chr10	58256010	58256707	698	IPMK	11187	CD14+ Monocyte	1.2591	0.787846	12.2948	0.000876336	0.0378332
chr18_48997929_48998863	chr18	48997929	48998863	935	SMAD7	47218	CD14+ Monocyte	-1.08639	2.47549	12.5865	0.000877015	0.0378332
chr1_158283894_158284356	chr1	158283894	158284356	463	CD1C	5566	CD14+ Monocyte	-0.657085	3.66095	12.5869	0.000878544	0.0378332
chr19_40741465_40742660	chr19	40741465	40742660	1196	C19orf54	7817	CD14+ Monocyte	1.11831	1.16443	12.4128	0.000878909	0.0378332
chr14_25086635_25087345	chr14	25086635	25087345	711	STXBP6	36338	CD14+ Monocyte	-1.24524	1.25075	12.4793	0.000879016	0.0378332
chr4_40196824_40197298	chr4	40196824	40197298	475	RHOH	82	CD14+ Monocyte	0.785754	1.70593	12.4549	0.000879634	0.0378332
chr5_90021109_90021670	chr5	90021109	90021670	562	CETN3	388086	CD14+ Monocyte	-0.655936	3.351	12.5836	0.000880311	0.0378332
chr6_111087019_111088726	chr6	111087019	111088726	1708	SLC16A10	483	CD14+ Monocyte	0.770525	2.85069	12.5725	0.00088091	0.0378332
chr19_7862115_7863021	chr19	7862115	7863021	907	PRR36	11369	CD14+ Monocyte	0.655157	3.18941	12.5818	0.000880948	0.0378332
chr1_236394860_236396099	chr1	236394860	236396099	1240	EDARADD	552	CD14+ Monocyte	1.08508	1.75578	12.46	0.000881448	0.0378332
chr6_143677722_143679152	chr6	143677722	143679152	1431	PHACTR2	242	CD14+ Monocyte	0.566287	3.43007	12.5769	0.000883483	0.0378842
chr19_43444733_43445319	chr19	43444733	43445319	587	LYPD3	20289	CD14+ Monocyte	-1.13066	2.12374	12.5527	0.000884186	0.0378842
chr16_4782010_4783061	chr16	4782010	4783061	1052	SEPTIN12	5284	CD14+ Monocyte	-0.830845	2.25997	12.5725	0.000884396	0.0378842
chr6_22360358_22361020	chr6	22360358	22361020	663	PRL	57523	CD14+ Monocyte	-0.985304	1.13553	12.4548	0.000885669	0.0378991
chr16_58881873_58882726	chr16	58881873	58882726	854	GOT2	147557	CD14+ Monocyte	-0.587475	2.95574	12.5702	0.000886168	0.0378991
chr2_165401268_165401731	chr2	165401268	165401731	464	SCN2A	107214	CD14+ Monocyte	1.26435	0.623604	12.2939	0.000887085	0.0378991
chr3_105351772_105352220	chr3	105351772	105352220	449	ALCAM	14492	CD14+ Monocyte	-0.70582	2.83644	12.5692	0.00088758	0.0378991
chr15_82944805_82945781	chr15	82944805	82945781	977	HOMER2	6939	CD14+ Monocyte	-0.890139	1.71247	12.5173	0.000887779	0.0378991
chr1_241821270_241821954	chr1	241821270	241821954	685	EXO1	26236	CD14+ Monocyte	-0.983669	1.30682	12.4589	0.000887826	0.0378991
chr8_29614619_29615355	chr8	29614619	29615355	737	LINC02099	132953	CD14+ Monocyte	-1.28732	1.11289	12.4108	0.000892125	0.0380637
chr2_101618836_101619510	chr2	101618836	101619510	675	MAP4K4	78192	CD14+ Monocyte	-0.564463	2.81409	12.5447	0.000894144	0.0381309
chr17_8123453_8123686	chr17	8123453	8123686	234	HES7	420	CD14+ Monocyte	0.951354	1.45227	12.3276	0.000897024	0.0381438
chr18_23861835_23863376	chr18	23861835	23863376	1542	LAMA3	9643	CD14+ Monocyte	1.08141	2.33812	12.487	0.000897105	0.0381438
chr1_168529382_168529954	chr1	168529382	168529954	573	XCL2	14043	CD14+ Monocyte	-0.988213	1.03083	12.3891	0.000897548	0.0381438
chr15_69697662_69698565	chr15	69697662	69698565	904	DRAIC	135943	CD14+ Monocyte	-0.961121	1.78553	12.4845	0.000900501	0.0381941
chr3_186241801_186242934	chr3	186241801	186242934	1134	DGKG	119300	CD14+ Monocyte	1.06326	2.16672	12.3712	0.000900813	0.0381941
chr14_71481015_71481426	chr14	71481015	71481426	412	SIPA1L1	42077	CD14+ Monocyte	-1.08826	1.06521	12.2988	0.000901382	0.0381941
chr5_116574581_116575240	chr5	116574581	116575240	660	SEMA6A-AS2	164	CD14+ Monocyte	0.750049	2.53906	12.5094	0.000901395	0.0381941
chr17_74210366_74210738	chr17	74210366	74210738	373	TTYH2	2832	CD14+ Monocyte	0.528561	3.10918	12.5267	0.000902142	0.0382069
chr3_69474128_69475041	chr3	69474128	69475041	914	FRMD4B	88040	CD14+ Monocyte	-1.30958	0.707763	12.2699	0.000902967	0.0382231
chr9_129664843_129666376	chr9	129664843	129666376	1534	PRRX2	730	CD14+ Monocyte	1.00153	1.7405	12.4304	0.000903585	0.0382305
chr10_26557000_26557335	chr10	26557000	26557335	336	APBB1IP	118660	CD14+ Monocyte	1.13474	1.17345	12.2924	0.000907503	0.0383585
chr10_118511465_118512246	chr10	118511465	118512246	782	PRLHR	83402	CD14+ Monocyte	-1.3524	1.67866	12.4633	0.000909493	0.0383905
chr1_17515887_17517062	chr1	17515887	17517062	1176	ARHGEF10L	22635	CD14+ Monocyte	-1.039	1.1496	12.3749	0.00091064	0.0384156
chr19_3275020_3276716	chr19	3275020	3276716	1697	CELF5	49743	CD14+ Monocyte	0.742178	3.18046	12.4912	0.000916136	0.0385718
chr19_19377721_19378155	chr19	19377721	19378155	435	GATAD2A	7687	CD14+ Monocyte	-0.874381	1.98503	12.4248	0.000916776	0.0385799
chr3_129240345_129240849	chr3	129240345	129240849	505	COPG1	8756	CD14+ Monocyte	-0.808931	2.00579	12.4096	0.000917945	0.0386102
chr6_129923601_129924271	chr6	129923601	129924271	671	L3MBTL3	94309	CD14+ Monocyte	-0.819076	1.51081	12.4267	0.00091983	0.0386706
chr2_218316320_218317078	chr2	218316320	218317078	759	PNKD	6100	CD14+ Monocyte	-0.70663	3.0864	12.4803	0.000920886	0.0386961
chr1_58618175_58618896	chr1	58618175	58618896	722	TACSTD2	40923	CD14+ Monocyte	-0.547069	4.48531	12.4713	0.000921614	0.0387078
chr2_181406847_181408179	chr2	181406847	181408179	1333	ITGA4	48712	CD14+ Monocyte	-0.691906	3.26261	12.4659	0.000925668	0.0388212
chr9_85425142_85425539	chr9	85425142	85425539	398	AGTPBP1	316415	CD14+ Monocyte	1.30307	0.617597	12.2039	0.000927034	0.0388595
chr12_7498647_7499279	chr12	7498647	7499279	633	CD163	4498	CD14+ Monocyte	-0.55332	2.84856	12.4613	0.000928497	0.038883
chr17_42669842_42671003	chr17	42669842	42671003	1162	PLEKHH3	5008	CD14+ Monocyte	0.585235	3.2268	12.455	0.000930346	0.0389415
chr15_66252317_66255231	chr15	66252317	66255231	2915	MEGF11	1433	CD14+ Monocyte	0.753211	2.62931	12.4281	0.000935761	0.0390268
chr12_94983218_94984609	chr12	94983218	94984609	1392	NDUFA12	19088	CD14+ Monocyte	1.35032	1.42082	12.2918	0.000936011	0.0390268
chr1_245156024_245157020	chr1	245156024	245157020	997	KIF26B	1040	CD14+ Monocyte	0.60271	3.26845	12.4397	0.000936464	0.0390268
chr17_68600219_68601411	chr17	68600219	68601411	1193	FAM20A	44	CD14+ Monocyte	0.634269	3.73425	12.4307	0.000939597	0.0391099
chr9_21053816_21054373	chr9	21053816	21054373	558	HACD4	22176	CD14+ Monocyte	-1.33971	0.819293	12.2031	0.00094005	0.0391099
chr17_72710068_72711338	chr17	72710068	72711338	1271	LINC00511	69596	CD14+ Monocyte	1.07677	1.48205	12.2251	0.000940277	0.0391099
chr19_16801582_16801920	chr19	16801582	16801920	339	SIN3B	27477	CD14+ Monocyte	-1.22862	0.809367	12.1909	0.000941216	0.039113
chr9_134173976_134174685	chr9	134173976	134174685	710	WDR5	37556	CD14+ Monocyte	-0.532057	3.43988	12.4262	0.000941261	0.039113
chr1_54408197_54408587	chr1	54408197	54408587	391	SSBP3	1803	CD14+ Monocyte	-0.759614	3.12271	12.4246	0.000943034	0.0391678
chr19_13921055_13922036	chr19	13921055	13922036	982	CC2D1A	14855	CD14+ Monocyte	0.605126	2.8155	12.4086	0.000947391	0.0393107
chr20_4160482_4162015	chr20	4160482	4162015	1534	SMOX	11655	CD14+ Monocyte	0.991867	3.37661	12.4072	0.000947845	0.0393107
chr6_163170092_163170788	chr6	163170092	163170788	697	CAHM	243162	CD14+ Monocyte	0.888187	1.48369	12.305	0.000950113	0.0393674
chr5_60196316_60196869	chr5	60196316	60196869	554	PDE4D	175794	CD14+ Monocyte	-1.31876	1.6894	12.3448	0.000950586	0.0393674
chr12_121036792_121037005	chr12	121036792	121037005	214	OASL	2237	CD14+ Monocyte	1.10526	1.95773	12.2913	0.000957205	0.0396195
chr2_84945988_84946988	chr2	84945988	84946988	1001	KCMF1	24172	CD14+ Monocyte	-0.503656	3.96526	12.3823	0.000957593	0.0396195
chr19_35146861_35147500	chr19	35146861	35147500	640	FXYD7	3607	CD14+ Monocyte	-0.848971	2.358	12.3645	0.000958307	0.03963
chr16_11669057_11670280	chr16	11669057	11670280	1224	SNN	603	CD14+ Monocyte	-0.521957	5.12283	12.3737	0.000960509	0.039702
chr20_62598754_62599055	chr20	62598754	62599055	302	SLCO4A1	43447	CD14+ Monocyte	0.72731	3.89219	12.3694	0.000963331	0.0397325
chr4_78581567_78581950	chr4	78581567	78581950	384	ANXA3	29798	CD14+ Monocyte	-1.37454	0.835987	12.2007	0.000963496	0.0397325
chr12_108337446_108337715	chr12	108337446	108337715	270	CMKLR1	1596	CD14+ Monocyte	0.694209	1.94917	12.3212	0.000965081	0.0397763
chr5_115460226_115461023	chr5	115460226	115461023	798	FEM1C	83752	CD14+ Monocyte	-1.28018	1.99292	12.2835	0.00096755	0.0398165
chr18_57737416_57738331	chr18	57737416	57738331	916	ATP8B1	64984	CD14+ Monocyte	-0.611288	3.55304	12.3567	0.000968458	0.0398165
chr2_97738251_97740004	chr2	97738251	97740004	1754	ZAP70	4952	CD14+ Monocyte	1.17908	1.52724	12.2198	0.000968935	0.0398165
chr19_49613847_49614822	chr19	49613847	49614822	976	PRR12	22666	CD14+ Monocyte	1.79651	2.52939	12.2691	0.000969458	0.0398165
chr4_67885809_67886707	chr4	67885809	67886707	899	TMPRSS11D	1807	CD14+ Monocyte	-0.834051	2.23766	12.3465	0.000970071	0.0398165
chr18_10400345_10402040	chr18	10400345	10402040	1696	LINC01254	12330	CD14+ Monocyte	-0.525534	4.10972	12.351	0.000970219	0.0398165
chr13_90800283_90800884	chr13	90800283	90800884	602	LINC00410	125713	CD14+ Monocyte	-1.23895	1.69992	12.3136	0.000973318	0.0398877
chr6_134424252_134424686	chr6	134424252	134424686	435	LINC01010	13029	CD14+ Monocyte	-1.12064	0.861245	12.1536	0.000973346	0.0398877
chr2_61443567_61444127	chr2	61443567	61444127	561	USP34	26960	CD14+ Monocyte	-0.598387	3.48716	12.3379	0.000976812	0.0399917
chr10_3834153_3834702	chr10	3834153	3834702	550	KLF6	48872	CD14+ Monocyte	-1.00162	1.39508	12.2117	0.000978187	0.0400289
chr4_6688607_6689411	chr4	6688607	6689411	805	S100P	4466	CD14+ Monocyte	1.0525	1.80806	12.2333	0.000980623	0.0400516
chr2_89213117_89213799	chr2	89213117	89213799	683	RPIA	521445	CD14+ Monocyte	-1.20997	1.01366	12.1959	0.000980635	0.0400516
chr19_19169902_19170879	chr19	19169902	19170879	978	MEF2B	361	CD14+ Monocyte	0.546338	3.16882	12.3304	0.000980766	0.0400516
chrX_65406618_65407685	chrX	65406618	65407685	1068	ZC3H12B	81049	CD14+ Monocyte	1.53022	0.578562	12.0038	0.000981186	0.0400516
chr12_57584400_57585176	chr12	57584400	57585176	777	PIP4K2C	6015	CD14+ Monocyte	-0.64373	2.18715	12.297	0.000984389	0.0401399
chr2_47065548_47066034	chr2	47065548	47066034	487	STPG4	89274	CD14+ Monocyte	-1.11453	1.03313	12.0772	0.000987142	0.0402042
chrX_118675331_118675687	chrX	118675331	118675687	357	IL13RA1	51918	CD14+ Monocyte	-1.21629	0.907451	12.1149	0.000989434	0.0402594
chr5_141519828_141520539	chr5	141519828	141520539	712	PCDHGC3	43863	CD14+ Monocyte	-0.571402	3.1203	12.3023	0.000991619	0.0402945
chr7_29109831_29110529	chr7	29109831	29110529	699	CPVL	36008	CD14+ Monocyte	-0.606851	3.17885	12.2977	0.000994392	0.0403848
chr1_84459892_84460642	chr1	84459892	84460642	751	RPF1	18623	CD14+ Monocyte	-0.736879	2.57604	12.3002	0.000995327	0.0404037
chr8_115055990_115056941	chr8	115055990	115056941	952	TRPS1	611072	CD14+ Monocyte	-0.765473	3.77731	12.2812	0.000999861	0.0405354
chr4_11861032_11861454	chr4	11861032	11861454	423	HS3ST1	432138	CD14+ Monocyte	-1.32107	0.69185	12.0174	0.00100021	0.0405354
chr3_15300340_15301278	chr3	15300340	15301278	939	SH3BP5	31308	CD14+ Monocyte	-0.60084	4.13033	12.28	0.00100022	0.0405354
chr6_6699885_6700457	chr6	6699885	6700457	573	LY86-AS1	77059	CD14+ Monocyte	-0.901437	1.57317	12.2068	0.00100049	0.0405354
chr17_2724032_2725186	chr17	2724032	2725186	1155	CLUH	12012	CD14+ Monocyte	1.0647	2.01298	12.1744	0.00100318	0.0405691
chr4_2734409_2735110	chr4	2734409	2735110	702	TNIP2	21226	CD14+ Monocyte	0.897908	1.60739	12.1584	0.00100364	0.0405691
chr1_66383231_66384067	chr1	66383231	66384067	837	PDE4B	28697	CD14+ Monocyte	-0.680312	2.4466	12.2709	0.00100459	0.0405882
chr8_52460078_52461314	chr8	52460078	52461314	1237	ST18	50199	CD14+ Monocyte	-1.07599	3.41643	12.2656	0.0010078	0.0406475
chr8_42033311_42033744	chr8	42033311	42033744	434	KAT6A	18243	CD14+ Monocyte	-0.811728	2.20222	12.2471	0.00100816	0.0406475
chr5_142925618_142926384	chr5	142925618	142926384	767	ARHGAP26-AS1	56708	CD14+ Monocyte	-1.21193	2.13994	12.2471	0.00100889	0.0406475
chr12_79886863_79887354	chr12	79886863	79887354	492	PPP1R12A	26557	CD14+ Monocyte	0.954707	1.15129	12.0715	0.00100953	0.0406544
chr3_123153985_123155010	chr3	123153985	123155010	1026	SEC22A	46932	CD14+ Monocyte	-0.727258	3.07566	12.2596	0.00101105	0.0406966
chr13_51451457_51451766	chr13	51451457	51451766	310	INTS6	1270	CD14+ Monocyte	0.56157	3.53845	12.2545	0.00101272	0.0407228
chr11_104073704_104074551	chr11	104073704	104074551	848	PDGFD	89596	CD14+ Monocyte	-0.571911	3.72965	12.249	0.00101372	0.0407228
chr19_58059046_58059743	chr19	58059046	58059743	698	ZNF135	192	CD14+ Monocyte	-1.24987	0.809489	11.9985	0.00101409	0.0407228
chr18_63552888_63553599	chr18	63552888	63553599	712	SERPINB13	33700	CD14+ Monocyte	-1.00575	2.09671	12.2525	0.00101454	0.0407228
chr7_47677353_47678416	chr7	47677353	47678416	1064	C7orf65	22110	CD14+ Monocyte	-0.771608	1.94883	12.2262	0.00101635	0.0407283
chr7_72393828_72394504	chr7	72393828	72394504	677	CALN1	17834	CD14+ Monocyte	-1.41326	0.95206	12.0336	0.00101642	0.0407283
chr22_19523156_19524322	chr22	19523156	19524322	1167	CLDN5	88	CD14+ Monocyte	1.37293	0.697549	11.9641	0.00101791	0.0407283
chr12_6169369_6169716	chr12	6169369	6169716	348	CD9	30229	CD14+ Monocyte	-0.524921	2.98723	12.2421	0.00101821	0.0407283
chr10_89116257_89116743	chr10	89116257	89116743	487	CH25H	90574	CD14+ Monocyte	-0.945158	2.04332	12.2179	0.00102116	0.0407799
chr15_63284321_63284674	chr15	63284321	63284674	354	APH1B	6717	CD14+ Monocyte	1.00371	1.33541	12.1124	0.00102118	0.0407799
chr9_94643029_94643655	chr9	94643029	94643655	627	FBP1	2766	CD14+ Monocyte	-0.610234	4.17038	12.228	0.00102225	0.0408037
chr5_96146448_96147091	chr5	96146448	96147091	644	ELL2	184597	CD14+ Monocyte	-0.627667	3.41372	12.2262	0.00102413	0.0408261
chr2_106510940_106512492	chr2	106510940	106512492	1553	CD8B2	23577	CD14+ Monocyte	-0.571295	3.4084	12.2266	0.00102434	0.0408261
chr19_1788614_1789129	chr19	1788614	1789129	516	ATP8B3	23147	CD14+ Monocyte	0.907387	1.64721	12.1271	0.00102471	0.0408261
chr10_17109172_17109791	chr10	17109172	17109791	620	CUBN	20020	CD14+ Monocyte	-1.09313	0.822968	11.9379	0.00102524	0.0408282
chr15_78425227_78425953	chr15	78425227	78425953	727	IREB2	11477	CD14+ Monocyte	-0.826443	1.30022	12.0918	0.00102606	0.0408423
chr19_10814811_10815607	chr19	10814811	10815607	797	TMED1	20133	CD14+ Monocyte	0.613564	2.78788	12.2133	0.00102708	0.0408638
chr17_66468322_66469398	chr17	66468322	66469398	1077	PRKCA-AS1	51468	CD14+ Monocyte	-0.506358	3.73309	12.2138	0.00102926	0.0409128
chr11_126062699_126063471	chr11	126062699	126063471	773	CDON	167	CD14+ Monocyte	0.71274	4.17143	12.2083	0.00103128	0.040974
chr1_84403425_84404000	chr1	84403425	84404000	576	DNASE2B	4269	CD14+ Monocyte	-1.13891	1.58851	12.1739	0.00103272	0.0410124
chr16_2855760_2856630	chr16	2855760	2856630	871	ZG16B	25589	CD14+ Monocyte	1.22119	1.11335	12.0153	0.00103352	0.0410252
chr11_32588927_32589480	chr11	32588927	32589480	554	EIF3M	5097	CD14+ Monocyte	1.05045	1.50926	12.0625	0.00103839	0.0411614
chr1_2466861_2469350	chr1	2466861	2469350	2490	PLCH2	589	CD14+ Monocyte	1.11362	1.72931	12.0844	0.00104061	0.0412114
chr4_113811338_113811817	chr4	113811338	113811817	480	CAMK2D	49411	CD14+ Monocyte	-0.640846	2.85819	12.1915	0.00104142	0.041219
chr6_139940852_139941854	chr6	139940852	139941854	1003	FILNC1	86003	CD14+ Monocyte	-0.639893	3.33198	12.1795	0.00104541	0.0413067
chr19_39502648_39503301	chr19	39502648	39503301	654	DLL3	3702	CD14+ Monocyte	0.512235	3.72939	12.1747	0.00104692	0.0413339
chr12_121629441_121630154	chr12	121629441	121630154	714	ORAI1	2892	CD14+ Monocyte	-0.534069	3.50835	12.1745	0.00104723	0.0413339
chr10_79022668_79023354	chr10	79022668	79023354	687	ZMIZ1-AS1	44094	CD14+ Monocyte	1.17715	1.2993	12.0254	0.00104762	0.0413339
chr7_84372483_84373239	chr7	84372483	84373239	757	SEMA3A	177694	CD14+ Monocyte	-0.971004	2.02639	12.1613	0.00104802	0.0413339
chr8_70152624_70154392	chr8	70152624	70154392	1769	PRDM14	81372	CD14+ Monocyte	1.30996	1.02949	11.947	0.00105343	0.0415282
chr18_9920268_9921289	chr18	9920268	9921289	1022	VAPA	6253	CD14+ Monocyte	-0.752072	1.98549	12.101	0.00105512	0.0415646
chr19_19255833_19256788	chr19	19255833	19256788	956	HAPLN4	6016	CD14+ Monocyte	1.16369	1.29527	12.0148	0.0010557	0.0415646
chr3_183295009_183295747	chr3	183295009	183295747	739	B3GNT5	41757	CD14+ Monocyte	-0.631789	3.2366	12.1546	0.00105705	0.0415646
chr2_37189421_37190746	chr2	37189421	37190746	1326	CEBPZOS	5749	CD14+ Monocyte	0.823516	3.08732	12.1514	0.00105811	0.0415792
chr13_76874263_76874837	chr13	76874263	76874837	575	KCTD12	11568	CD14+ Monocyte	-0.586174	2.60652	12.1429	0.00106153	0.0416569
chr20_17518236_17519051	chr20	17518236	17519051	816	BFSP1	12328	CD14+ Monocyte	-0.904184	1.88816	12.1292	0.00106452	0.041717
chr19_7870746_7870975	chr19	7870746	7870975	230	PRR36	3415	CD14+ Monocyte	1.13756	1.58094	12.0013	0.0010684	0.041793
chr7_148711343_148712212	chr7	148711343	148712212	870	CUL1	11634	CD14+ Monocyte	0.791848	1.63985	11.9741	0.00107322	0.0419625
chr2_101972402_101973686	chr2	101972402	101973686	1285	LINC01127	9778	CD14+ Monocyte	-0.643033	3.38453	12.1162	0.00107428	0.0419816
chr1_78617432_78617997	chr1	78617432	78617997	566	IFI44L	2450	CD14+ Monocyte	0.819652	2.6425	12.1057	0.00107518	0.0419816
chr19_4534693_4535430	chr19	4534693	4535430	738	PLIN5	206	CD14+ Monocyte	0.650286	3.19387	12.1136	0.00107641	0.0419952
chr3_127585429_127585747	chr3	127585429	127585747	319	TPRA1	4986	CD14+ Monocyte	1.08213	1.43049	11.8701	0.0010765	0.0419952
chr17_41505825_41506667	chr17	41505825	41506667	843	KRT13	213	CD14+ Monocyte	-0.931718	1.51734	12.0784	0.00107965	0.0420721
chr7_134502539_134502970	chr7	134502539	134502970	432	AKR1B10	24596	CD14+ Monocyte	-0.981387	1.65676	12.0672	0.00107985	0.0420721
chr3_183541866_183542127	chr3	183541866	183542127	262	KLHL6-AS1	6607	CD14+ Monocyte	-0.826558	2.79399	12.0994	0.00108323	0.0421622
chr2_8313785_8314521	chr2	8313785	8314521	737	LINC00299	13898	CD14+ Monocyte	-0.686334	3.09134	12.0927	0.00108524	0.0422086
chr7_39833237_39833901	chr7	39833237	39833901	665	LINC00265	99670	CD14+ Monocyte	0.972947	1.17768	11.9433	0.00108625	0.0422086
chr1_247420999_247421496	chr1	247420999	247421496	498	NLRP3	4827	CD14+ Monocyte	-0.961814	2.0925	12.0545	0.00108719	0.0422209
chr12_55676504_55677206	chr12	55676504	55677206	703	METTL7B	4529	CD14+ Monocyte	0.723773	3.68026	12.0787	0.00109129	0.0423228
chr3_156690558_156691480	chr3	156690558	156691480	923	TIPARP	13895	CD14+ Monocyte	1.04855	1.41855	11.9102	0.00109212	0.0423359
chr13_31880287_31881431	chr13	31880287	31881431	1145	RXFP2	140746	CD14+ Monocyte	-0.893435	1.18235	11.9614	0.00109383	0.0423831
chr2_203870709_203872098	chr2	203870709	203872098	1390	CTLA4	2939	CD14+ Monocyte	-0.601009	3.33557	12.0684	0.00109604	0.0424191
chr8_29634845_29635618	chr8	29634845	29635618	774	LINC02099	112690	CD14+ Monocyte	-0.565933	3.00661	12.07	0.00109646	0.0424191
chr7_151682750_151685087	chr7	151682750	151685087	2338	PRKAG2	50132	CD14+ Monocyte	1.18349	1.27604	11.8942	0.00109673	0.0424191
chr17_43880168_43880770	chr17	43880168	43880770	603	MPP2	19854	CD14+ Monocyte	1.14103	1.23919	11.8434	0.00109763	0.0424348
chr7_77351402_77352090	chr7	77351402	77352090	689	GSAP	64259	CD14+ Monocyte	0.553754	3.38678	12.0568	0.0011015	0.0425273
chr2_60385478_60386315	chr2	60385478	60386315	838	BCL11A	167183	CD14+ Monocyte	-0.673951	2.72838	12.0534	0.00110376	0.0425761
chr20_1472815_1473528	chr20	1472815	1473528	714	NSFL1C	5123	CD14+ Monocyte	-0.519451	3.1736	12.05	0.00110522	0.0426135
chr2_200845072_200846039	chr2	200845072	200846039	968	CLK1	18522	CD14+ Monocyte	1.50769	0.848777	11.7472	0.00110659	0.0426472
chr1_48229154_48229798	chr1	48229154	48229798	645	SLC5A9	6439	CD14+ Monocyte	-0.765501	1.8427	12.0298	0.0011078	0.04265
chr5_110000176_110001422	chr5	110000176	110001422	1247	MAN2A1	310811	CD14+ Monocyte	-0.513234	3.69848	12.0408	0.00110815	0.04265
chr16_71918831_71920234	chr16	71918831	71920234	1404	IST1	23301	CD14+ Monocyte	0.611338	2.65545	12.0389	0.00110981	0.0426757
chr1_15001273_15001744	chr1	15001273	15001744	472	KAZN	55355	CD14+ Monocyte	2.35353	0.631415	11.7335	0.00111032	0.0426762
chr17_6755580_6757365	chr17	6755580	6757365	1786	XAF1	134	CD14+ Monocyte	0.526673	3.69988	12.0359	0.00111139	0.0426786
chr6_6008453_6009388	chr6	6008453	6009388	936	NRN1	848	CD14+ Monocyte	0.958133	3.27863	12.028	0.00111231	0.0426786
chr3_185914749_185916254	chr3	185914749	185916254	1506	TRA2B	21760	CD14+ Monocyte	0.754319	2.79951	12.0283	0.0011125	0.0426786
chr3_177781532_177782075	chr3	177781532	177782075	544	LINC00578	339612	CD14+ Monocyte	-1.32359	0.768518	11.8477	0.00111336	0.0426786
chr1_192797668_192798507	chr1	192797668	192798507	840	RGS2	10531	CD14+ Monocyte	-0.904124	1.69657	11.9932	0.00111664	0.0427604
chr5_74294098_74295111	chr5	74294098	74295111	1014	LINC01331	241865	CD14+ Monocyte	-0.700683	2.57608	12.0309	0.00111673	0.0427604
chr6_27866211_27866806	chr6	27866211	27866806	596	OR2B6	90434	CD14+ Monocyte	0.50084	2.86757	12.0244	0.00111698	0.0427604
chr12_92297593_92298621	chr12	92297593	92298621	1029	CLLU1	122909	CD14+ Monocyte	-0.7648	2.78353	12.0247	0.00111844	0.0427969
chr10_73110185_73111362	chr10	73110185	73111362	1178	NUDT13	189	CD14+ Monocyte	-0.550597	3.43314	12.0189	0.00111932	0.0428119
chr13_30681689_30682429	chr13	30681689	30682429	741	ALOX5AP	31048	CD14+ Monocyte	-0.704965	2.89134	12.017	0.00112051	0.0428272
chr6_167391934_167393331	chr6	167391934	167393331	1398	TTLL2	66849	CD14+ Monocyte	1.65986	0.975782	11.7755	0.00112395	0.0428968
chr5_83172572_83173001	chr5	83172572	83173001	430	XRCC4	95026	CD14+ Monocyte	-1.23423	0.793401	11.8201	0.00112615	0.0429585
chr10_48523390_48524693	chr10	48523390	48524693	1304	ARHGAP22	29740	CD14+ Monocyte	0.854227	1.92353	11.9328	0.00112784	0.043004
chr12_131104490_131105122	chr12	131104490	131105122	633	LINC01257	59888	CD14+ Monocyte	0.573748	2.38978	11.9914	0.00113084	0.0430751
chr19_47095005_47096287	chr19	47095005	47096287	1283	ZC3H4	17489	CD14+ Monocyte	1.26188	1.63985	11.8797	0.00113121	0.0430751
chr11_73072729_73073514	chr11	73072729	73073514	786	FCHSD2	68804	CD14+ Monocyte	-0.705975	1.90657	11.9631	0.001132	0.0430862
chr2_70851582_70852244	chr2	70851582	70852244	663	CD207	15766	CD14+ Monocyte	-0.586999	3.14701	11.9912	0.00113332	0.0431054
chr1_22709832_22711380	chr1	22709832	22711380	1549	EPHB2	542	CD14+ Monocyte	0.591663	4.01629	11.9892	0.00113381	0.0431054
chr2_112868998_112870149	chr2	112868998	112870149	1152	IL1B	32219	CD14+ Monocyte	-0.758326	2.58009	11.9781	0.00113613	0.0431479
chr21_29248179_29248444	chr21	29248179	29248444	266	BACH1	50477	CD14+ Monocyte	-0.944427	1.43746	11.9194	0.0011386	0.0431656
chr19_8598013_8598816	chr19	8598013	8598816	804	ADAMTS10	5817	CD14+ Monocyte	1.08627	1.06711	11.8074	0.00114027	0.0431907
chr17_42256446_42256858	chr17	42256446	42256858	413	STAT5B	19533	CD14+ Monocyte	1.34516	0.764579	11.6875	0.00114027	0.0431907
chr6_14889284_14890708	chr6	14889284	14890708	1425	JARID2	355360	CD14+ Monocyte	0.572695	3.48979	11.9743	0.00114171	0.0432169
chr7_151085946_151086475	chr7	151085946	151086475	530	AGAP3	1	CD14+ Monocyte	-0.598152	4.46192	11.9658	0.00114363	0.0432169
chr16_3490894_3491725	chr16	3490894	3491725	832	C16orf90	3764	CD14+ Monocyte	1.27912	0.54711	11.6932	0.00114369	0.0432169
chr8_52727094_52727789	chr8	52727094	52727789	696	RB1CC1	12628	CD14+ Monocyte	-1.36955	0.942162	11.7597	0.00114431	0.0432169
chr3_97954295_97954869	chr3	97954295	97954869	575	RIOX2	17562	CD14+ Monocyte	-0.804874	2.13422	11.9645	0.00114437	0.0432169
chr7_28669053_28670014	chr7	28669053	28670014	962	CREB5	16118	CD14+ Monocyte	0.681655	3.39232	11.9691	0.00114448	0.0432169
chr11_118610381_118611238	chr11	118610381	118611238	858	PHLDB1	2767	CD14+ Monocyte	0.587242	3.13874	11.9661	0.00114581	0.0432407
chr5_139687039_139687605	chr5	139687039	139687605	567	CXXC5	11597	CD14+ Monocyte	0.948765	1.33233	11.8185	0.00114784	0.043272
chr19_45125691_45126503	chr19	45125691	45126503	813	PPP1R37	32513	CD14+ Monocyte	0.688147	2.27988	11.9452	0.00114901	0.043274
chr18_77160338_77161182	chr18	77160338	77161182	845	MBP	27555	CD14+ Monocyte	-0.72479	2.3816	11.9515	0.00115195	0.0433261
chr19_51644815_51645349	chr19	51644815	51645349	535	SIGLEC14	1470	CD14+ Monocyte	-1.09449	2.13212	11.9005	0.00115279	0.0433261
chr3_5974553_5975239	chr3	5974553	5975239	687	EDEM1	786847	CD14+ Monocyte	-1.23597	1.28643	11.8883	0.00115335	0.0433261
chr15_80778943_80779757	chr15	80778943	80779757	815	CEMIP	388	CD14+ Monocyte	0.821549	2.10321	11.8923	0.00115472	0.0433564
chr17_10791977_10792611	chr17	10791977	10792611	635	TMEM220	61648	CD14+ Monocyte	1.25331	1.38847	11.8042	0.00115585	0.0433797
chr22_28759689_28761000	chr22	28759689	28761000	1312	CCDC117	11673	CD14+ Monocyte	-0.730243	2.08533	11.9335	0.00115694	0.0433831
chr17_3944477_3945604	chr17	3944477	3945604	1128	ATP2A3	18833	CD14+ Monocyte	1.23725	1.20973	11.7291	0.00115876	0.0434183
chr20_53835340_53835881	chr20	53835340	53835881	542	BCAS1	223139	CD14+ Monocyte	-0.741417	2.97589	11.9381	0.00115899	0.0434183
chr16_89353230_89353934	chr16	89353230	89353934	705	ZNF778	135528	CD14+ Monocyte	0.608298	3.00498	11.9343	0.0011594	0.0434183
chr8_143385088_143385724	chr8	143385088	143385724	637	RHPN1	16213	CD14+ Monocyte	0.624649	2.50691	11.9272	0.00116147	0.0434584
chr17_75120041_75120719	chr17	75120041	75120719	679	ARMC7	10073	CD14+ Monocyte	-0.919432	1.81622	11.879	0.00116285	0.0434911
chr3_12325546_12326535	chr3	12325546	12326535	990	PPARG	23572	CD14+ Monocyte	-0.729972	2.71242	11.9335	0.00116369	0.0435033
chr14_95255256_95256139	chr14	95255256	95256139	884	CLMN	63769	CD14+ Monocyte	-0.976344	2.08438	11.9191	0.00116619	0.0435394
chr2_187554031_187554712	chr2	187554031	187554712	682	TFPI	207	CD14+ Monocyte	1.23362	1.00736	11.7381	0.00116644	0.0435394
chr19_15343028_15344063	chr19	15343028	15344063	1036	BRD4	10489	CD14+ Monocyte	1.44418	0.843887	11.6007	0.00116668	0.0435394
chr3_191239470_191240302	chr3	191239470	191240302	833	OSTN-AS1	4865	CD14+ Monocyte	-0.889253	1.44884	11.8573	0.00116787	0.0435462
chr19_18017157_18017707	chr19	18017157	18017707	551	ARRDC2	8988	CD14+ Monocyte	-0.783867	2.05794	11.815	0.00116894	0.0435672
chr7_76282332_76283171	chr7	76282332	76283171	840	HSPB1	19501	CD14+ Monocyte	0.862704	1.89078	11.8519	0.00117027	0.043598
chr14_103155099_103155915	chr14	103155099	103155915	817	TNFAIP2	31639	CD14+ Monocyte	-1.10055	1.15631	11.8018	0.00117302	0.0436666
chr20_2338505_2339459	chr20	2338505	2339459	955	TGM3	42505	CD14+ Monocyte	-0.896521	1.57394	11.8353	0.001174	0.0436802
chr13_40477527_40478455	chr13	40477527	40478455	929	LINC00598	2551	CD14+ Monocyte	-0.802773	3.88752	11.9009	0.00117618	0.0437238
chr1_29121088_29122096	chr1	29121088	29122096	1009	TMEM200B	405	CD14+ Monocyte	0.651996	3.13684	11.9043	0.00117619	0.0437238
chr11_66012779_66013698	chr11	66012779	66013698	920	CST6	772	CD14+ Monocyte	-0.528153	3.61208	11.8973	0.00117926	0.0438189
chr2_191436364_191437015	chr2	191436364	191437015	652	MYO1B	190961	CD14+ Monocyte	-0.604515	3.19517	11.8968	0.00117987	0.0438227
chr7_116588209_116589412	chr7	116588209	116589412	1204	CAV1	61848	CD14+ Monocyte	-0.742009	2.38293	11.8942	0.00118148	0.0438634
chr7_39700701_39701545	chr7	39700701	39701545	845	LINC00265	32022	CD14+ Monocyte	-0.597575	2.70559	11.8954	0.00118222	0.0438688
chr7_2796788_2797180	chr7	2796788	2797180	393	GNA12	18050	CD14+ Monocyte	-1.60874	0.947337	11.6325	0.00118315	0.0438688
chr9_87515133_87515342	chr9	87515133	87515342	210	DAPK1	16599	CD14+ Monocyte	-0.947531	1.63541	11.8145	0.00118326	0.0438688
chr10_73906652_73906871	chr10	73906652	73906871	220	PLAU	4260	CD14+ Monocyte	-0.786853	2.73111	11.8881	0.00118538	0.0438688
chr3_57974638_57975573	chr3	57974638	57975573	936	FLNB	32848	CD14+ Monocyte	-0.81145	2.3713	11.8864	0.0011857	0.0438688
chr1_159132141_159132845	chr1	159132141	159132845	705	CADM3	38769	CD14+ Monocyte	0.95898	1.60013	11.8042	0.00118898	0.0439524
chr1_225723287_225724182	chr1	225723287	225724182	896	SRP9	53630	CD14+ Monocyte	-1.19939	1.3465	11.8056	0.00119038	0.0439849
chr2_26847773_26849934	chr2	26847773	26849934	2162	DPYSL5	358	CD14+ Monocyte	0.983951	1.90336	11.8107	0.00119088	0.0439849
chr20_35054544_35056468	chr20	35054544	35056468	1925	TRPC4AP	36339	CD14+ Monocyte	1.48349	2.27182	11.7966	0.0011934	0.0439914
chr12_111834529_111835696	chr12	111834529	111835696	1168	MAPKAPK5-AS1	6234	CD14+ Monocyte	-0.698041	4.2686	11.8665	0.00119361	0.0439914
chr2_222971457_222972302	chr2	222971457	222972302	846	KCNE4	79887	CD14+ Monocyte	0.585245	2.62309	11.8685	0.00119565	0.0440288
chr11_75428256_75428686	chr11	75428256	75428686	431	KLHL35	1943	CD14+ Monocyte	0.783289	3.43445	11.8654	0.00119632	0.0440348
chr1_40076698_40077316	chr1	40076698	40077316	619	PPT1	19936	CD14+ Monocyte	-0.992252	2.01652	11.8166	0.00119935	0.0440947
chr11_59204881_59205434	chr11	59204881	59205434	554	MPEG1	7493	CD14+ Monocyte	-1.0712	1.35417	11.7506	0.00120083	0.0441252
chr5_76199371_76200004	chr5	76199371	76200004	634	SV2C	115989	CD14+ Monocyte	-1.53116	0.587536	11.621	0.00120176	0.0441404
chr17_78232056_78233257	chr17	78232056	78233257	1202	BIRC5	17804	CD14+ Monocyte	1.15888	1.49889	11.7234	0.00120376	0.0441831
chr1_156816560_156817308	chr1	156816560	156817308	749	SH2D2A	103	CD14+ Monocyte	0.857324	2.48921	11.8466	0.00120395	0.0441831
chr18_76131578_76132236	chr18	76131578	76132236	659	ZNF516	363006	CD14+ Monocyte	1.28737	1.57199	11.6793	0.00120884	0.0442871
chr10_43076279_43077966	chr10	43076279	43077966	1688	RET	747	CD14+ Monocyte	0.793535	2.2395	11.8183	0.00121058	0.0443055
chr12_55930852_55931156	chr12	55930852	55931156	305	DGKA	5	CD14+ Monocyte	0.697879	2.4145	11.8259	0.00121089	0.0443055
chr11_71531910_71532521	chr11	71531910	71532521	612	KRTAP5-7	4644	CD14+ Monocyte	2.3722	0.875318	11.6406	0.00121497	0.0444121
chr14_54502370_54503005	chr14	54502370	54503005	636	CGRRF1	6900	CD14+ Monocyte	-0.506017	3.40929	11.8258	0.00121619	0.0444242
chr16_87401267_87402060	chr16	87401267	87402060	794	MAP1LC3B	8932	CD14+ Monocyte	1.09925	1.34503	11.6351	0.00122051	0.0445246
chr18_45236696_45237133	chr18	45236696	45237133	438	SLC14A2	23702	CD14+ Monocyte	-1.25749	0.784124	11.6365	0.00122101	0.0445246
chr9_81737607_81738410	chr9	81737607	81738410	804	TLE1	48060	CD14+ Monocyte	-0.898045	1.77456	11.7728	0.00122523	0.0445978
chr11_19625238_19626119	chr11	19625238	19626119	882	NAV2	86717	CD14+ Monocyte	-0.650751	2.60306	11.8106	0.00122541	0.0445978
chr1_54798830_54799808	chr1	54798830	54799808	979	TTC22	1515	CD14+ Monocyte	1.07241	1.91853	11.7433	0.00122621	0.0445978
chr6_111427296_111428163	chr6	111427296	111428163	868	REV3L	55055	CD14+ Monocyte	-0.741888	2.75004	11.809	0.00122649	0.0445978
chr6_134340000_134340894	chr6	134340000	134340894	895	SGK1	21942	CD14+ Monocyte	-0.621374	2.54203	11.8104	0.00122665	0.0445978
chr5_160500509_160501377	chr5	160500509	160501377	869	MIR3142HG	32259	CD14+ Monocyte	-0.669452	3.0463	11.8041	0.00122835	0.0446218
chrX_7083602_7084574	chrX	7083602	7084574	973	STS	62715	CD14+ Monocyte	-0.539765	4.07163	11.7991	0.0012293	0.0446218
chr8_19389172_19389910	chr8	19389172	19389910	739	SH2D4A	75197	CD14+ Monocyte	-0.807217	2.8274	11.8035	0.00122938	0.0446218
chr4_121070800_121073190	chr4	121070800	121073190	2391	NDNF	655	CD14+ Monocyte	0.824534	3.63993	11.8003	0.00123019	0.0446262
chr1_185483678_185484764	chr1	185483678	185484764	1087	LINC01350	143724	CD14+ Monocyte	-0.616485	3.2323	11.7981	0.00123106	0.0446262
chr20_49384476_49385931	chr20	49384476	49385931	1456	KCNB1	96737	CD14+ Monocyte	0.746135	1.95913	11.7626	0.00123236	0.0446356
chr18_58551281_58552455	chr18	58551281	58552455	1175	ALPK2	76636	CD14+ Monocyte	-1.19105	1.03047	11.5513	0.00123466	0.0446798
chr19_54694713_54695332	chr19	54694713	54695332	620	LILRB4	31895	CD14+ Monocyte	-1.10609	1.67927	11.7295	0.00123513	0.0446798
chr2_127562855_127564337	chr2	127562855	127564337	1483	MYO7B	27054	CD14+ Monocyte	0.950411	3.37267	11.7894	0.00123632	0.0447005
chrX_40570273_40571596	chrX	40570273	40571596	1324	ATP6AP2	9373	CD14+ Monocyte	-0.565622	3.26143	11.7871	0.00123675	0.0447005
chr6_16409627_16410193	chr6	16409627	16410193	567	GMPR	171041	CD14+ Monocyte	0.724793	2.01215	11.7671	0.00123949	0.044781
chr14_61662277_61663071	chr14	61662277	61663071	795	HIF1A	32441	CD14+ Monocyte	-0.519039	3.97025	11.7725	0.00124299	0.0448695
chr19_11191175_11191820	chr19	11191175	11191820	646	KANK2	5725	CD14+ Monocyte	0.851809	1.66371	11.6214	0.00124582	0.044953
chr1_228809570_228810306	chr1	228809570	228810306	737	RHOU	74092	CD14+ Monocyte	-1.06557	1.59715	11.6906	0.00124739	0.044965
chr11_86141372_86142179	chr11	86141372	86142179	808	PICALM	71512	CD14+ Monocyte	-0.515152	3.55213	11.7631	0.00124924	0.044965
chr8_116058018_116058736	chr8	116058018	116058736	719	TRPS1	389043	CD14+ Monocyte	-0.565067	3.54394	11.7621	0.00124924	0.044965
chr1_112841668_112842502	chr1	112841668	112842502	835	LINC01356	8141	CD14+ Monocyte	-0.92109	1.78713	11.7443	0.00125082	0.0450011
chr12_32402930_32403383	chr12	32402930	32403383	454	FGD4	3373	CD14+ Monocyte	-1.0222	1.5534	11.6893	0.00125178	0.045017
chr1_231808866_231809348	chr1	231808866	231809348	483	DISC1-IT1	116485	CD14+ Monocyte	-0.758145	2.66705	11.7601	0.00125289	0.0450383
chr7_69246545_69247401	chr7	69246545	69247401	857	CT66	350223	CD14+ Monocyte	-0.763464	2.62015	11.7596	0.00125417	0.0450654
chr3_187951611_187952389	chr3	187951611	187952389	779	LINC01991	24018	CD14+ Monocyte	-0.562803	2.8263	11.7552	0.00125508	0.0450793
chr3_48565875_48566485	chr3	48565875	48566485	611	UCN2	2094	CD14+ Monocyte	-0.648591	3.00986	11.7505	0.00125626	0.0451027
chr6_110528001_110528330	chr6	110528001	110528330	330	SLC22A16	51388	CD14+ Monocyte	0.912634	1.44761	11.643	0.00126411	0.0452471
chr22_50267684_50268013	chr22	50267684	50268013	330	MAPK11	2367	CD14+ Monocyte	0.805713	2.26451	11.7227	0.00126423	0.0452471
chr20_23622611_23623438	chr20	23622611	23623438	828	CST3	14517	CD14+ Monocyte	-0.572647	2.93826	11.7394	0.00126424	0.0452471
chr1_24956943_24957445	chr1	24956943	24957445	503	RUNX3	7565	CD14+ Monocyte	-0.843273	2.15818	11.7247	0.00126489	0.0452471
chr3_27553780_27555229	chr3	27553780	27555229	1450	SLC4A7	69396	CD14+ Monocyte	-0.646371	2.97239	11.7337	0.00126668	0.0452471
chr1_223834786_223835323	chr1	223834786	223835323	538	TP53BP2	10624	CD14+ Monocyte	-0.674858	2.21752	11.7188	0.0012668	0.0452471
chr10_75626206_75627003	chr10	75626206	75627003	798	LRMDA	20505	CD14+ Monocyte	-1.17236	0.945274	11.5716	0.00126764	0.0452471
chr12_62785754_62786606	chr12	62785754	62786606	853	PPM1H	148544	CD14+ Monocyte	-0.636229	3.13813	11.7267	0.00126964	0.0452878
chr18_61998867_61999470	chr18	61998867	61999470	604	RNF152	105860	CD14+ Monocyte	-1.00862	1.35959	11.5895	0.00126983	0.0452878
chr14_87995101_87995313	chr14	87995101	87995313	213	GALC	1436	CD14+ Monocyte	0.646772	2.35623	11.7168	0.00127268	0.0453516
chr11_122832461_122833361	chr11	122832461	122833361	901	CRTAM	5138	CD14+ Monocyte	-1.16118	0.984521	11.458	0.00127573	0.0454229
chr2_236866251_236867161	chr2	236866251	236867161	911	COPS8	218279	CD14+ Monocyte	-0.515626	3.60599	11.7123	0.00127671	0.0454356
chr10_61961353_61962576	chr10	61961353	61962576	1224	ARID5B	59655	CD14+ Monocyte	1.23955	1.17196	11.5312	0.00127892	0.0454462
chr3_39271849_39273262	chr3	39271849	39273262	1414	CX3CR1	6774	CD14+ Monocyte	-0.527149	3.53289	11.7074	0.0012794	0.0454462
chr17_68344058_68345080	chr17	68344058	68345080	1023	ARSG	51924	CD14+ Monocyte	-0.679833	2.72621	11.7072	0.00127943	0.0454462
chr7_27324235_27324746	chr7	27324235	27324746	512	HOXA11-AS	138828	CD14+ Monocyte	-1.22612	0.902019	11.4812	0.00128034	0.0454462
chr15_31227775_31228548	chr15	31227775	31228548	774	LINC02352	11755	CD14+ Monocyte	-0.742282	2.32854	11.7006	0.00128098	0.0454462
chr19_54179811_54180633	chr19	54179811	54180633	823	TMC4	6651	CD14+ Monocyte	-0.637102	3.48633	11.7044	0.00128144	0.0454462
chr19_14661087_14662180	chr19	14661087	14662180	1094	ADGRE3	12664	CD14+ Monocyte	-0.604	3.52451	11.697	0.00128529	0.0455156
chr6_134512060_134513356	chr6	134512060	134513356	1297	CT69	33163	CD14+ Monocyte	-0.726001	2.61419	11.6998	0.00128618	0.0455156
chr21_15904276_15905838	chr21	15904276	15905838	1563	MIR99AHG	164649	CD14+ Monocyte	1.23697	1.11399	11.4433	0.00128627	0.0455156
chr5_95861200_95861818	chr5	95861200	95861818	619	LINC01554	8969	CD14+ Monocyte	-0.552956	4.14621	11.6918	0.00128692	0.0455198
chr17_81844137_81844802	chr17	81844137	81844802	666	PPP1R27	9087	CD14+ Monocyte	1.20454	0.967382	11.4122	0.00128788	0.0455198
chr5_172816855_172817193	chr5	172816855	172817193	339	ERGIC1	17057	CD14+ Monocyte	-1.01574	0.628258	11.3478	0.00128798	0.0455198
chr22_35375146_35375493	chr22	35375146	35375493	348	HMOX1	5602	CD14+ Monocyte	-0.667235	2.64495	11.6851	0.0012912	0.0455775
chr18_45100786_45101377	chr18	45100786	45101377	592	SLC14A2	66585	CD14+ Monocyte	1.10453	1.25034	11.5527	0.00129245	0.0456013
chr12_89979615_89980825	chr12	89979615	89980825	1211	LINC02399	31923	CD14+ Monocyte	-0.56324	2.74646	11.687	0.00129293	0.0456013
chr5_56522913_56523433	chr5	56522913	56523433	521	LINC01948	41144	CD14+ Monocyte	-1.13723	1.11681	11.4563	0.00129554	0.0456747
chr9_90808531_90809529	chr9	90808531	90809529	999	SYK	6713	CD14+ Monocyte	-0.569913	4.01679	11.6708	0.00129878	0.0457513
chr6_146892079_146893180	chr6	146892079	146893180	1102	LUADT1	265744	CD14+ Monocyte	-0.594101	3.11812	11.6704	0.00130175	0.0458278
chr5_168159202_168159991	chr5	168159202	168159991	790	WWC1	131653	CD14+ Monocyte	-1.06333	2.87771	11.6677	0.00130255	0.0458278
chr22_25546374_25547292	chr22	25546374	25547292	919	GRK3	17382	CD14+ Monocyte	-0.613497	3.5638	11.6649	0.00130308	0.0458278
chr17_9974212_9975596	chr17	9974212	9975596	1385	GAS7	14717	CD14+ Monocyte	-0.754445	2.86321	11.6618	0.00130534	0.0458886
chr4_111991193_111992227	chr4	111991193	111992227	1035	FAM241A	153226	CD14+ Monocyte	-1.12456	2.74831	11.6631	0.00130617	0.0458989
chr8_129676584_129677198	chr8	129676584	129677198	615	CCDC26	3041	CD14+ Monocyte	-0.839216	2.25829	11.6638	0.0013072	0.0459015
chr14_89364731_89365659	chr14	89364731	89365659	929	FOXN3	51574	CD14+ Monocyte	-0.50406	3.9155	11.6553	0.00130791	0.0459037
chr1_228058415_228061186	chr1	228058415	228061186	2772	LINC02809	15364	CD14+ Monocyte	0.705334	3.29003	11.6569	0.00130904	0.0459248
chr12_89244433_89245904	chr12	89244433	89245904	1472	DUSP6	106597	CD14+ Monocyte	-0.512135	3.96089	11.6487	0.00131125	0.0459836
chr7_152451321_152452124	chr7	152451321	152452124	804	LINC01003	11999	CD14+ Monocyte	-1.06181	1.00929	11.458	0.00131261	0.0459957
chr14_24911518_24912161	chr14	24911518	24912161	644	STXBP6	136839	CD14+ Monocyte	-1.03159	1.93946	11.6124	0.00131437	0.0460366
chr8_63146585_63147462	chr8	63146585	63147462	878	YTHDF3-AS1	20980	CD14+ Monocyte	-0.751246	4.02634	11.6351	0.00131884	0.0461324
chrX_2708235_2709177	chrX	2708235	2709177	943	CD99	16941	CD14+ Monocyte	-0.687754	3.92765	11.6355	0.00131973	0.0461324
chr10_91894219_91894884	chr10	91894219	91894884	666	FGFBP3	14602	CD14+ Monocyte	-0.843051	1.45595	11.5726	0.00131978	0.0461324
chr7_142703708_142704472	chr7	142703708	142704472	765	MTRNR2L6	37410	CD14+ Monocyte	-0.774603	1.62431	11.6044	0.00132085	0.0461417
chr9_21023431_21024361	chr9	21023431	21024361	931	HACD4	7279	CD14+ Monocyte	-0.504665	2.57572	11.6342	0.00132166	0.0461417
chr14_97543975_97545268	chr14	97543975	97545268	1294	LINC02325	85160	CD14+ Monocyte	0.927474	2.23173	11.599	0.00133511	0.0465736
chr16_11495444_11495737	chr16	11495444	11495737	294	LITAF	90636	CD14+ Monocyte	1.21278	1.0196	11.3231	0.00133698	0.0466197
chr13_51533965_51534957	chr13	51533965	51534957	993	WDFY2	49504	CD14+ Monocyte	-0.633195	2.31004	11.6062	0.00133807	0.0466388
chr6_7468395_7469224	chr6	7468395	7469224	830	DSP	72446	CD14+ Monocyte	-1.01872	1.99311	11.5666	0.00134286	0.0467615
chr7_37728581_37729330	chr7	37728581	37729330	750	GPR141	44816	CD14+ Monocyte	-0.900512	2.51616	11.5887	0.00134322	0.0467615
chr20_23602044_23602937	chr20	23602044	23602937	894	CST9	2980	CD14+ Monocyte	-0.555808	3.21157	11.593	0.00134488	0.0468007
chr1_179294546_179295373	chr1	179294546	179295373	828	SOAT1	750	CD14+ Monocyte	-0.563093	3.08435	11.5872	0.00134964	0.0469115
chr9_124536520_124537541	chr9	124536520	124537541	1022	NR5A1	29121	CD14+ Monocyte	0.900839	1.99413	11.557	0.00135025	0.0469115
chr7_1432091_1433063	chr7	1432091	1433063	973	MICALL2	26407	CD14+ Monocyte	0.591834	2.70007	11.5831	0.00135137	0.0469225
chr20_63235417_63236632	chr20	63235417	63236632	1216	BIRC7	487	CD14+ Monocyte	1.20665	1.00359	11.3684	0.00135166	0.0469225
chr11_60370845_60371649	chr11	60370845	60371649	805	MS4A7	6835	CD14+ Monocyte	-1.02139	1.32092	11.3501	0.00135621	0.0470616
chr14_100159014_100160270	chr14	100159014	100160270	1257	DEGS2	625	CD14+ Monocyte	1.21385	0.942333	11.3696	0.00135743	0.0470848
chr3_98585352_98585909	chr3	98585352	98585909	558	CPOX	7702	CD14+ Monocyte	-0.809607	2.06911	11.5595	0.00135885	0.0471151
chr3_144659782_144660712	chr3	144659782	144660712	931	DIPK2A	686702	CD14+ Monocyte	-1.07515	1.79802	11.5485	0.00136551	0.0473106
chr16_55787864_55788587	chr16	55787864	55788587	724	CES1	44509	CD14+ Monocyte	-2.28655	1.3945	11.3492	0.00136957	0.0474135
chr5_180093534_180094159	chr5	180093534	180094159	626	RNF130	21775	CD14+ Monocyte	-0.658256	3.29215	11.5499	0.00137019	0.0474135
chr4_38069016_38069591	chr4	38069016	38069591	576	TBC1D1	40589	CD14+ Monocyte	-1.31375	1.37192	11.4336	0.00137131	0.0474135
chr2_25960667_25961584	chr2	25960667	25961584	918	KIF3C	20913	CD14+ Monocyte	-0.565105	3.63915	11.5436	0.001373	0.0474261
chr7_20475661_20476685	chr7	20475661	20476685	1025	ABCB5	138981	CD14+ Monocyte	-0.966369	1.55638	11.4325	0.00137377	0.0474261
chr7_141950700_141951256	chr7	141950700	141951256	557	CLEC5A	3726	CD14+ Monocyte	-0.735512	2.58537	11.5405	0.00137387	0.0474261
chr12_1809949_1810399	chr12	1809949	1810399	451	LRTM2	9867	CD14+ Monocyte	-0.839074	2.4491	11.5379	0.00137398	0.0474261
chr3_30473223_30474034	chr3	30473223	30474034	812	LINC01985	44833	CD14+ Monocyte	-0.670228	2.76321	11.5462	0.00137443	0.0474261
chr12_47138796_47139881	chr12	47138796	47139881	1086	AMIGO2	58837	CD14+ Monocyte	-0.54829	2.88673	11.5429	0.00137599	0.047461
chr7_36287933_36288231	chr7	36287933	36288231	299	KIAA0895	79009	CD14+ Monocyte	-0.6606	2.45024	11.5317	0.00137849	0.047528
chr1_228850173_228851147	chr1	228850173	228851147	975	RHOU	114695	CD14+ Monocyte	-0.642322	3.23938	11.5369	0.00137909	0.0475296
chr15_48313170_48313669	chr15	48313170	48313669	500	DUT	17425	CD14+ Monocyte	3.42313	0.686299	11.2565	0.00138172	0.0475668
chr18_63440781_63441381	chr18	63440781	63441381	601	VPS4B	18305	CD14+ Monocyte	-0.532598	3.63439	11.5298	0.00138177	0.0475668
chrX_42967744_42968227	chrX	42967744	42968227	484	PPP1R2C	189581	CD14+ Monocyte	-1.15676	0.930078	11.3762	0.00138205	0.0475668
chr3_149473543_149474201	chr3	149473543	149474201	659	TM4SF4	495	CD14+ Monocyte	-0.580258	3.44388	11.5286	0.00138246	0.0475668
chr5_147509193_147510397	chr5	147509193	147510397	1205	DPYSL3	329	CD14+ Monocyte	0.941219	1.68346	11.4861	0.00138293	0.0475668
chr7_115019808_115020700	chr7	115019808	115020700	893	LINC01393	58257	CD14+ Monocyte	-0.521572	3.52446	11.5246	0.00138447	0.0476008
chr9_21831902_21832618	chr9	21831902	21832618	717	MTAP	29267	CD14+ Monocyte	0.611166	4.33957	11.5155	0.00138854	0.0477003
chr8_78223799_78224496	chr8	78223799	78224496	698	PKIA	291843	CD14+ Monocyte	-0.839168	1.94339	11.5028	0.00138928	0.0477003
chr1_54800945_54801854	chr1	54800945	54801854	910	TTC22	378	CD14+ Monocyte	0.953353	1.79353	11.4541	0.00138958	0.0477003
chr3_40314517_40314877	chr3	40314517	40314877	361	EIF1B	4811	CD14+ Monocyte	-0.882554	2.56205	11.5092	0.00139632	0.0478933
chr1_108063481_108064264	chr1	108063481	108064264	784	VAV3	98301	CD14+ Monocyte	-0.894381	1.7726	11.4555	0.00139908	0.047969
chr2_197443705_197444441	chr2	197443705	197444441	737	SF3B1	8612	CD14+ Monocyte	-0.817433	2.31223	11.4898	0.00140064	0.0479843
chr2_187168504_187169787	chr2	187168504	187169787	1284	CALCRL	278465	CD14+ Monocyte	-0.591406	2.534	11.4928	0.00140531	0.048125
chr1_146471993_146472964	chr1	146471993	146472964	972	PPIAL4H	127086	CD14+ Monocyte	0.668727	2.17165	11.4709	0.00140923	0.0482016
chr13_90713514_90713902	chr13	90713514	90713902	389	LINC00410	212695	CD14+ Monocyte	-1.423	1.08602	11.3678	0.00141069	0.0482324
chr6_72580040_72580666	chr6	72580040	72580666	627	KCNQ5	41397	CD14+ Monocyte	-0.782555	1.79393	11.4635	0.00141138	0.0482367
chr13_40629781_40630522	chr13	40629781	40630522	742	FOXO1	36119	CD14+ Monocyte	-1.0187	1.6917	11.4507	0.00141449	0.0483049
chr4_139763462_139765089	chr4	139763462	139765089	1628	MGST2	97644	CD14+ Monocyte	-0.855051	1.69426	11.4047	0.00141701	0.0483717
chr19_491680_492224	chr19	491680	492224	545	ODF3L2	56	CD14+ Monocyte	1.23854	1.24147	11.3147	0.00141826	0.0483762
chr22_38208555_38209098	chr22	38208555	38209098	544	MAFF	5536	CD14+ Monocyte	0.892649	2.12405	11.3707	0.00142474	0.0485336
chr19_42420103_42420311	chr19	42420103	42420311	209	LIPE-AS1	3443	CD14+ Monocyte	0.98443	1.29552	11.3109	0.00142514	0.0485336
chr14_68383290_68384085	chr14	68383290	68384085	796	ZFP36L1	408982	CD14+ Monocyte	-0.738799	2.53883	11.4488	0.00142867	0.0486348
chr11_398384_399157	chr11	398384	399157	774	SIGIRR	15842	CD14+ Monocyte	1.11837	1.08844	11.3	0.00143021	0.0486518
chr4_161580935_161581948	chr4	161580935	161581948	1014	FSTL5	582052	CD14+ Monocyte	-0.853581	2.96708	11.4506	0.00143134	0.0486518
chr5_138081185_138081708	chr5	138081185	138081708	524	FAM13B	48072	CD14+ Monocyte	-0.872269	1.56719	11.3868	0.00143143	0.0486518
chr10_119301170_119301778	chr10	119301170	119301778	609	GRK5	93600	CD14+ Monocyte	-0.934454	1.43856	11.3871	0.00143415	0.0487248
chr11_59010655_59011120	chr11	59010655	59011120	466	FAM111B	96064	CD14+ Monocyte	-1.12231	1.22746	11.33	0.00143843	0.048829
chr1_234727192_234727460	chr1	234727192	234727460	269	LINC01132	3151	CD14+ Monocyte	-0.790372	1.82612	11.3916	0.0014393	0.048829
chr6_159099977_159100258	chr6	159099977	159100258	282	TAGAP	54825	CD14+ Monocyte	0.937214	1.7377	11.3428	0.00144204	0.0488693
chr15_51359684_51360781	chr15	51359684	51360781	1098	GLDN	16464	CD14+ Monocyte	1.13692	1.82897	11.3125	0.00144228	0.0488693
chr5_160499791_160500279	chr5	160499791	160500279	489	MIR3142HG	31541	CD14+ Monocyte	-1.22306	0.949895	11.2231	0.00144314	0.048876
chr7_106278098_106278897	chr7	106278098	106278897	800	NAMPT	6086	CD14+ Monocyte	0.78032	2.49945	11.4155	0.0014443	0.0488769
chr20_54090102_54091088	chr20	54090102	54091088	987	BCAS1	19337	CD14+ Monocyte	-1.03806	1.5659	11.3943	0.00144634	0.0489266
chr12_6392322_6392922	chr12	6392322	6392922	601	LTBR	8161	CD14+ Monocyte	-1.01283	1.1632	11.3007	0.00144867	0.048986
chr4_86918414_86919045	chr4	86918414	86919045	632	AFF1	15956	CD14+ Monocyte	-0.951914	1.72907	11.3771	0.00144932	0.0489866
chr21_37828990_37830127	chr21	37828990	37830127	1138	KCNJ6	86330	CD14+ Monocyte	-0.530995	3.42009	11.406	0.00145788	0.0492203
chr21_29647309_29647692	chr21	29647309	29647692	384	GRIK1-AS1	100482	CD14+ Monocyte	-1.26143	0.860587	11.1627	0.00145985	0.049248
chrX_9885121_9886236	chrX	9885121	9886236	1116	GPR143	119274	CD14+ Monocyte	0.863283	1.64816	11.3439	0.00146083	0.049262
chr20_4060178_4061564	chr20	4060178	4061564	1387	RNF24	44620	CD14+ Monocyte	0.607803	3.49491	11.3961	0.00146457	0.0492951
chr12_63963811_63964165	chr12	63963811	63964165	355	SRGAP1	119112	CD14+ Monocyte	-1.24213	1.0575	11.2366	0.00146462	0.0492951
chr16_84594105_84594846	chr16	84594105	84594846	742	COTL1	23232	CD14+ Monocyte	-0.696757	2.88059	11.3967	0.00146468	0.0492951
chr8_67720247_67720856	chr8	67720247	67720856	610	CPA6	25504	CD14+ Monocyte	-1.28373	0.843301	11.1749	0.00146637	0.0493327
chr13_51559930_51560826	chr13	51559930	51560826	897	WDFY2	23635	CD14+ Monocyte	-0.582659	2.78802	11.3898	0.00147067	0.0494388
chr1_26553843_26554829	chr1	26553843	26554829	987	RPS6KA1	8002	CD14+ Monocyte	0.947978	3.14402	11.3596	0.00147187	0.0494402
chr3_23112537_23112901	chr3	23112537	23112901	365	UBE2E2-AS1	89677	CD14+ Monocyte	-0.839696	2.06493	11.3731	0.00147373	0.0494452
chr15_38229518_38230140	chr15	38229518	38230140	623	SPRED1	22695	CD14+ Monocyte	-1.19847	1.07651	11.2426	0.00147409	0.0494452
chr5_112117466_112118603	chr5	112117466	112118603	1138	EPB41L4A-AS1	41922	CD14+ Monocyte	-0.773238	1.66327	11.3325	0.00147411	0.0494452
chr16_1871964_1872775	chr16	1871964	1872775	812	MEIOB	200	CD14+ Monocyte	0.877001	2.39347	11.3504	0.00147431	0.0494452
chr2_229341775_229343290	chr2	229341775	229343290	1516	PID1	70488	CD14+ Monocyte	-0.792135	1.82699	11.3658	0.00147508	0.0494518
chr6_53584697_53585901	chr6	53584697	53585901	1205	GCLC	39596	CD14+ Monocyte	-1.28561	1.71614	11.3414	0.00147581	0.0494528
chr15_47410198_47410758	chr15	47410198	47410758	561	SLC24A5	710231	CD14+ Monocyte	-1.14793	0.657855	11.1938	0.00147626	0.0494528
chr4_38562187_38563340	chr4	38562187	38563340	1154	LINC01258	39007	CD14+ Monocyte	-0.743639	2.0612	11.3676	0.00147717	0.0494638
chr22_16818613_16819658	chr22	16818613	16819658	1046	XKR3	2041	CD14+ Monocyte	-1.11673	1.72363	11.3459	0.00147788	0.0494685
chr9_124476992_124477901	chr9	124476992	124477901	910	NR5A1	29498	CD14+ Monocyte	1.15163	1.72717	11.3007	0.00147947	0.0494803
chr3_45043249_45044263	chr3	45043249	45044263	1015	CLEC3B	13107	CD14+ Monocyte	-0.77528	2.31567	11.3693	0.00147992	0.0494803
chr6_31855066_31855948	chr6	31855066	31855948	883	NEU1	6873	CD14+ Monocyte	1.1187	1.49109	11.2362	0.00148063	0.0494803
chr19_19689133_19690240	chr19	19689133	19690240	1108	ZNF101	20295	CD14+ Monocyte	1.34936	0.943865	11.1206	0.00148111	0.0494803
chr16_3798630_3799451	chr16	3798630	3799451	822	CREBBP	80669	CD14+ Monocyte	1.13045	1.33809	11.1817	0.00148263	0.0494926
chr19_14542473_14543213	chr19	14542473	14543213	741	TECR	12880	CD14+ Monocyte	0.778409	1.60601	11.3127	0.00148417	0.0494963
chr2_147665050_147665701	chr2	147665050	147665701	652	ACVR2A	178815	CD14+ Monocyte	-1.1042	1.12867	11.271	0.00148446	0.0494963
chr8_8452426_8453193	chr8	8452426	8453193	768	PRAG1	65987	CD14+ Monocyte	-0.966348	1.34777	11.3127	0.00148935	0.049609
chr2_39127010_39127363	chr2	39127010	39127363	354	SOS1	2142	CD14+ Monocyte	-0.791189	2.21972	11.3436	0.00149005	0.049609
chr2_152024605_152024803	chr2	152024605	152024803	199	CACNB4	50627	CD14+ Monocyte	1.11326	0.776819	11.1748	0.00149013	0.049609
chr5_59275072_59276533	chr5	59275072	59276533	1462	PDE4D	418	CD14+ Monocyte	0.689115	2.23566	11.3348	0.00149015	0.049609
chr16_20680233_20680988	chr16	20680233	20680988	756	ACSM1	10268	CD14+ Monocyte	-1.06879	1.16228	11.1805	0.00149321	0.0496916
chr3_14439221_14440323	chr3	14439221	14440323	1103	SLC6A6	36616	CD14+ Monocyte	-0.529779	4.0995	11.3432	0.00149706	0.0498004
chr15_51004078_51004614	chr15	51004078	51004614	537	MIR4713HG	32873	CD14+ Monocyte	0.551672	3.77358	11.3417	0.00149867	0.0498066
chr15_89472697_89473207	chr15	89472697	89473207	511	MIR9-3HG	94656	CD14+ Monocyte	1.10671	0.94967	11.1639	0.0015028	0.0498188
chr2_111037080_111037538	chr2	111037080	111037538	459	ACOXL-AS1	78050	CD14+ Monocyte	-0.895006	1.30319	11.245	0.00150316	0.0498188
chr15_64024129_64025230	chr15	64024129	64025230	1102	DAPK2	21255	CD14+ Monocyte	1.2002	1.03322	11.1592	0.00150398	0.0498188
chr17_60142168_60143322	chr17	60142168	60143322	1155	CA4	6650	CD14+ Monocyte	0.73633	2.7615	11.3225	0.00150737	0.0498566
chr11_103870674_103871267	chr11	103870674	103871267	594	PDGFD	292880	CD14+ Monocyte	-1.26759	0.928504	11.1935	0.00150749	0.0498566
chr2_222709136_222709801	chr2	222709136	222709801	666	MOGAT1	37479	CD14+ Monocyte	-0.554339	3.83855	11.3254	0.00150917	0.0498566
chr15_49232343_49233259	chr15	49232343	49233259	917	GALK2	62097	CD14+ Monocyte	-0.842713	1.4937	11.2817	0.00151037	0.0498771
chr5_165139390_165140173	chr5	165139390	165140173	784	MAT2B	1633772	CD14+ Monocyte	-0.808799	2.12841	11.3185	0.00151175	0.0498839
chr11_59267817_59268403	chr11	59267817	59268403	587	MPEG1	54890	CD14+ Monocyte	-0.976417	0.87137	11.0984	0.0015121	0.0498839
chr19_45300717_45300923	chr19	45300717	45300923	207	CKM	21952	CD14+ Monocyte	1.28287	0.640174	11.0762	0.00151232	0.0498839
chr18_54209442_54210220	chr18	54209442	54210220	779	MBD2	14449	CD14+ Monocyte	-0.934863	1.58868	11.2518	0.00151373	0.0498967
chr2_7097006_7097872	chr2	7097006	7097872	867	RNF144A	163923	CD14+ Monocyte	0.634778	2.80041	11.323	0.00151387	0.0498967
chr1_108041564_108042152	chr1	108041564	108042152	589	VAV3	76384	CD14+ Monocyte	-0.869323	1.53988	11.2857	0.00151568	0.0499
chr5_37391386_37392243	chr5	37391386	37392243	858	WDR70	12069	CD14+ Monocyte	-0.817477	1.47629	11.2452	0.00151771	0.0499147
chr10_43091613_43092379	chr10	43091613	43092379	767	RET	12352	CD14+ Monocyte	-0.570203	3.04251	11.3126	0.0015197	0.049936
chr1_181064157_181064433	chr1	181064157	181064433	277	IER5	24266	CD14+ Monocyte	-0.989991	1.34775	11.2212	0.00152177	0.0499585
chr21_39014696_39015249	chr21	39014696	39015249	554	PSMG1	168202	CD14+ Monocyte	-0.798994	2.83251	11.31	0.00152329	0.0499585
chr1_160546606_160547706	chr1	160546606	160547706	1101	SLAMF6	23351	CD14+ Monocyte	-0.512879	3.5529	11.3043	0.0015237	0.0499585
chr9_91681287_91681993	chr9	91681287	91681993	707	NFIL3	256661	CD14+ Monocyte	0.781049	2.19267	11.285	0.00152685	0.0499585
chr3_31670057_31670766	chr3	31670057	31670766	710	OSBPL10-AS1	33446	CD14+ Monocyte	-1.00703	2.42353	11.2933	0.0015272	0.0499585
chr5_157665744_157666281	chr5	157665744	157666281	538	SOX30	5199	CD14+ Monocyte	-0.604615	2.84028	11.3017	0.00152741	0.0499585
chr1_15455328_15456089	chr1	15455328	15456089	762	CELA2A	642	CD14+ Monocyte	1.61667	0.963824	11.0822	0.00152909	0.0499585
chr22_18023772_18024877	chr22	18023772	18024877	1106	MICAL3	316	CD14+ Monocyte	1.08629	0.977515	11.1015	0.00153085	0.0499968
chr7_105193166_105193561	chr7	105193166	105193561	396	SRPK2	75516	CD14+ Monocyte	-1.05851	1.00798	11.144	0.00153177	0.0500043
chr4_101018921_101019466	chr4	101018921	101019466	546	PPP3CA	328060	CD14+ Monocyte	-0.752592	1.94408	11.2804	0.00153618	0.0500544
chr22_46562341_46562834	chr22	46562341	46562834	494	GRAMD4	14253	CD14+ Monocyte	-0.861617	2.13779	11.2681	0.00153972	0.0501154
chr8_81956705_81957263	chr8	81956705	81957263	559	SNX16	114419	CD14+ Monocyte	-0.874237	1.29503	11.221	0.00154312	0.050207
chr7_38169873_38170337	chr7	38169873	38170337	465	STARD3NL	7907	CD14+ Monocyte	-1.08805	1.80025	11.2082	0.0015468	0.0502699
chr14_84128971_84129536	chr14	84128971	84129536	566	LINC00911	1264342	CD14+ Monocyte	-1.02521	1.58566	11.233	0.00154835	0.0502895
chr12_15269032_15269400	chr12	15269032	15269400	369	RERG	47615	CD14+ Monocyte	0.904762	1.11255	11.1696	0.00154949	0.0502895
chr9_126413005_126413968	chr9	126413005	126413968	964	MVB12B	86177	CD14+ Monocyte	-0.681655	2.38057	11.2656	0.00154955	0.0502895
chr19_4581803_4582555	chr19	4581803	4582555	753	SEMA6B	22119	CD14+ Monocyte	1.05048	0.967588	11.0326	0.00155056	0.0502895
chr17_559617_561347	chr17	559617	561347	1731	RFLNB	113677	CD14+ Monocyte	-0.735983	4.24819	11.2622	0.00155063	0.0502895
chr15_79310758_79312250	chr15	79310758	79312250	1493	TMED3	303	CD14+ Monocyte	0.646734	2.64329	11.2613	0.00155455	0.0503515
chr10_49329026_49329579	chr10	49329026	49329579	554	DRGX	66510	CD14+ Monocyte	-0.940218	1.01556	11.1139	0.00155458	0.0503515
chrX_14819588_14820387	chrX	14819588	14820387	800	FANCB	52682	CD14+ Monocyte	-0.712548	2.96941	11.2594	0.00155523	0.0503536
chr9_129422437_129423562	chr9	129422437	129423562	1126	LINC00963	65097	CD14+ Monocyte	-0.810818	2.32017	11.2404	0.00155634	0.0503707
chr19_50492016_50492681	chr19	50492016	50492681	666	FAM71E1	15168	CD14+ Monocyte	0.683547	2.77551	11.2512	0.00155964	0.0504396
chr15_74545994_74546627	chr15	74545994	74546627	634	ARID3B	4775	CD14+ Monocyte	-0.559488	3.77177	11.2485	0.00156064	0.0504496
chr8_74129382_74130050	chr8	74129382	74130050	669	LY96	137991	CD14+ Monocyte	1.13929	1.13846	11.1286	0.00156189	0.0504554
chr6_166235037_166236064	chr6	166235037	166236064	1028	SFT2D1	106481	CD14+ Monocyte	-0.757306	2.54144	11.2318	0.00156602	0.0505627
chr9_123362154_123363318	chr9	123362154	123363318	1165	CRB2	5460	CD14+ Monocyte	1.22712	1.39006	11.062	0.00156843	0.0506096
chr1_224203250_224203847	chr1	224203250	224203847	598	DEGS1	19571	CD14+ Monocyte	-0.607534	2.8314	11.2352	0.00157001	0.0506309
chr10_110535884_110536820	chr10	110535884	110536820	937	SMC3	30874	CD14+ Monocyte	-0.820315	3.43776	11.2342	0.00157117	0.0506309
chr7_33040646_33041416	chr7	33040646	33041416	771	NT5C3A	260	CD14+ Monocyte	0.541015	2.67042	11.2321	0.00157167	0.0506309
chr2_149568086_149568759	chr2	149568086	149568759	674	MMADHC	19016	CD14+ Monocyte	1.1896	1.95073	11.1968	0.00157454	0.0506682
chr17_19397980_19399057	chr17	19397980	19399057	1078	MFAP4	10790	CD14+ Monocyte	-0.678826	4.24092	11.2254	0.0015753	0.0506682
chr17_39967069_39967816	chr17	39967069	39967816	748	GSDMA	4066	CD14+ Monocyte	-0.548113	3.2785	11.2279	0.00157641	0.0506682
chr12_61870646_61872013	chr12	61870646	61872013	1368	TAFA2	320826	CD14+ Monocyte	-0.646143	2.65929	11.2231	0.00157994	0.0507338
chr7_2661978_2662350	chr7	2661978	2662350	373	AMZ1	17171	CD14+ Monocyte	1.16495	1.0454	11.026	0.00158279	0.0507521
chr11_44727162_44728260	chr11	44727162	44728260	1099	TSPAN18	201	CD14+ Monocyte	0.936955	2.04008	11.203	0.00158345	0.0507521
chr14_74619669_74620077	chr14	74619669	74620077	409	LTBP2	7432	CD14+ Monocyte	-0.612867	2.55435	11.2101	0.00158346	0.0507521
chr10_120803824_120804573	chr10	120803824	120804573	750	WDR11-AS1	46606	CD14+ Monocyte	-0.887969	1.05197	11.0945	0.00158511	0.0507603
chr17_17934790_17936341	chr17	17934790	17936341	1552	TOM1L2	36059	CD14+ Monocyte	-0.508242	4.20935	11.2109	0.00158533	0.0507603
chr9_5518162_5519202	chr9	5518162	5519202	1041	PDCD1LG2	7632	CD14+ Monocyte	0.636142	2.33271	11.199	0.00158783	0.0508163
chr1_84077429_84078854	chr1	84077429	84078854	1426	PRKACB	545	CD14+ Monocyte	0.635273	3.15571	11.2115	0.00158843	0.0508168
chr12_112939835_112940390	chr12	112939835	112940390	556	OAS3	1362	CD14+ Monocyte	0.656095	2.75724	11.2019	0.0015897	0.0508196
chr1_172515707_172516516	chr1	172515707	172516516	810	SUCO	15832	CD14+ Monocyte	-0.576176	2.64077	11.2073	0.00159276	0.0508606
chr15_73704621_73705258	chr15	73704621	73705258	638	CD276	19852	CD14+ Monocyte	0.787246	1.64189	11.1557	0.00159585	0.0509405
chr11_7599983_7600949	chr11	7599983	7600949	967	PPFIBP2	2795	CD14+ Monocyte	-0.818236	2.04759	11.1823	0.00159715	0.050963
chr20_3710872_3711796	chr20	3710872	3711796	925	SIGLEC1	804	CD14+ Monocyte	0.511296	3.95989	11.1948	0.00159796	0.0509678
chr3_141689880_141691179	chr3	141689880	141691179	1300	RNF7	47029	CD14+ Monocyte	-0.507263	3.34373	11.1944	0.00159868	0.0509678
chr5_176995786_176996518	chr5	176995786	176996518	733	UIMC1	9924	CD14+ Monocyte	-0.586539	3.26662	11.1945	0.00159929	0.0509678
chr2_85306776_85307710	chr2	85306776	85307710	935	TGOLN2	20279	CD14+ Monocyte	-0.767732	3.26415	11.1924	0.00160062	0.0509792
chr15_84816905_84818450	chr15	84816905	84818450	1546	ALPK3	450	CD14+ Monocyte	0.848117	1.54416	11.1239	0.00160354	0.0510474
chr10_33876593_33877393	chr10	33876593	33877393	801	LINC00838	103913	CD14+ Monocyte	-1.24095	1.13115	11.1159	0.00160395	0.0510474
chr13_49428233_49428815	chr13	49428233	49428815	583	CAB39L	14482	CD14+ Monocyte	-1.19401	0.907701	11.0308	0.00160899	0.0511572
chr1_221161554_221161987	chr1	221161554	221161987	434	LINC02817	174309	CD14+ Monocyte	-1.03943	0.995735	10.9561	0.00161552	0.0511897
chr1_47725175_47726678	chr1	47725175	47726678	1504	FOXD2	287132	CD14+ Monocyte	1.06587	1.55955	11.0741	0.00161666	0.0511897
chr1_15479780_15481265	chr1	15479780	15481265	1486	CELA2B	3677	CD14+ Monocyte	1.23524	0.925715	10.9517	0.00161746	0.0511937
chr3_157137213_157138217	chr3	157137213	157138217	1005	LINC00880	14211	CD14+ Monocyte	0.58084	2.81086	11.1672	0.00161912	0.0512272
chr3_16875993_16876768	chr3	16875993	16876768	776	PLCL2	8186	CD14+ Monocyte	-0.711905	2.85077	11.1648	0.00162116	0.051273
[truncated: 4,648 more rows]

## Sheet: RSV_G1G2G3 vs Healthy
Peak	chr	start	end	Peak Length	Nearest Expressed Gene	Distance	Cell Type	logFC	logCPM	F	PValue	p.adjusted
chr11_355183_356450	chr11	355183	356450	1268	IFITM3	34323	CD14+ Monocyte	2.44842	3.64265	76.8724	1.24058e-11	1.06764e-06
chr2_152038427_152038959	chr2	152038427	152038959	533	CACNB4	59804	CD14+ Monocyte	-1.96498	2.02366	51.9526	2.72702e-09	0.000117344
chr2_26499660_26499878	chr2	26499660	26499878	219	OTOF	21536	CD14+ Monocyte	3.94519	1.406	45.2901	1.05688e-08	0.000303182
chr19_11209496_11210623	chr19	11209496	11210623	1128	KANK2	11631	CD14+ Monocyte	2.0075	1.78357	42.7072	2.41968e-08	0.000520595
chr12_121025908_121027220	chr12	121025908	121027220	1313	C12orf43	9421	CD14+ Monocyte	1.50322	2.48591	42.6319	3.21793e-08	0.00055387
chr6_69881382_69882148	chr6	69881382	69882148	767	COL19A1	14827	CD14+ Monocyte	-1.44817	2.10064	41.6999	4.70306e-08	0.000633229
chr7_148618208_148618478	chr7	148618208	148618478	271	C7orf33	27443	CD14+ Monocyte	2.49168	1.56725	39.3629	5.15059e-08	0.000633229
chr20_3686439_3688661	chr20	3686439	3688661	2223	SIGLEC1	18573	CD14+ Monocyte	2.1469	1.69226	38.7151	7.35211e-08	0.000790904
chr4_37892361_37893274	chr4	37892361	37893274	914	TBC1D1	1278	CD14+ Monocyte	-0.822132	3.34015	38.5969	1.15947e-07	0.000990639
chr17_2547056_2547696	chr17	2547056	2547696	641	METTL16	35168	CD14+ Monocyte	2.80606	0.790218	36.4059	1.20197e-07	0.000990639
chr10_124224342_124227885	chr10	124224342	124227885	3544	CHST15	130744	CD14+ Monocyte	1.4338	4.29762	38.0229	1.36313e-07	0.000990639
chr12_56320993_56321793	chr12	56320993	56321793	801	CNPY2	4645	CD14+ Monocyte	1.23235	4.00871	37.5026	1.58633e-07	0.000990639
chr13_113663759_113667979	chr13	113663759	113667979	4221	TFDP1	79007	CD14+ Monocyte	1.1789	3.25075	37.2379	1.70171e-07	0.000990639
chr2_240965262_240966361	chr2	240965262	240966361	1100	SNED1	32256	CD14+ Monocyte	-1.8739	1.5211	36.2787	1.79692e-07	0.000990639
chr2_240960435_240961528	chr2	240960435	240961528	1094	SNED1	37089	CD14+ Monocyte	-1.29531	2.47505	36.8638	1.87968e-07	0.000990639
chr10_53122268_53122829	chr10	53122268	53122829	562	LNCAROD	651735	CD14+ Monocyte	-1.79521	1.03251	35.7244	1.89121e-07	0.000990639
chr3_28989235_28990277	chr3	28989235	28990277	1043	RBMS3-AS3	290662	CD14+ Monocyte	-1.57486	1.9418	36.7443	1.95687e-07	0.000990639
chr7_77726567_77727166	chr7	77726567	77727166	600	APTR	29222	CD14+ Monocyte	1.93096	1.6705	34.3213	2.91206e-07	0.00138449
chr20_63814606_63817315	chr20	63814606	63817315	2710	ZBTB46-AS1	6531	CD14+ Monocyte	1.13959	2.99896	35.1797	3.05663e-07	0.00138449
chr9_27341025_27341849	chr9	27341025	27341849	825	EQTN	43875	CD14+ Monocyte	-1.31047	2.48419	34.5405	3.7955e-07	0.00160157
chr14_69042720_69044055	chr14	69042720	69044055	1336	ACTN1-AS1	63039	CD14+ Monocyte	-0.529363	4.54459	34.4099	3.90808e-07	0.00160157
chr21_41410730_41412130	chr21	41410730	41412130	1401	MX1	8427	CD14+ Monocyte	2.11634	2.79006	32.7555	5.97195e-07	0.00218664
chr6_73474126_73474914	chr6	73474126	73474914	789	MTO1	12390	CD14+ Monocyte	1.86174	1.75623	32.1314	6.07772e-07	0.00218664
chr20_52675093_52676950	chr20	52675093	52676950	1858	LINC01524	54256	CD14+ Monocyte	-1.15288	3.88264	32.9527	6.098e-07	0.00218664
chr20_35054544_35056468	chr20	35054544	35056468	1925	TRPC4AP	36339	CD14+ Monocyte	2.23704	2.27164	32.0821	6.89527e-07	0.00237363
chr19_28485139_28485712	chr19	28485139	28485712	574	LINC00906	479418	CD14+ Monocyte	-1.5941	0.951374	30.6787	8.26868e-07	0.00273693
chr17_80395436_80398207	chr17	80395436	80398207	2772	ENDOV	16959	CD14+ Monocyte	1.64286	3.10572	31.3358	9.72613e-07	0.00305539
chr6_16237984_16240029	chr6	16237984	16240029	2046	GMPR	602	CD14+ Monocyte	0.671124	5.31222	31.3561	9.94084e-07	0.00305539
chr22_18147331_18147558	chr22	18147331	18147558	228	USP18	2611	CD14+ Monocyte	2.21034	1.13531	29.6516	1.20992e-06	0.0035883
chr17_80284588_80285948	chr17	80284588	80285948	1361	RNF213	23737	CD14+ Monocyte	1.78779	1.78034	29.8297	1.25651e-06	0.0035883
chr22_18148192_18148679	chr22	18148192	18148679	488	USP18	1490	CD14+ Monocyte	2.19655	1.4178	29.4702	1.29255e-06	0.0035883
chr10_99815701_99816190	chr10	99815701	99816190	490	ABCC2	33062	CD14+ Monocyte	1.90492	1.03568	28.8959	1.3776e-06	0.00370487
chr6_109322824_109323526	chr6	109322824	109323526	703	CD164	58213	CD14+ Monocyte	-0.845833	3.00043	30.0155	1.52896e-06	0.00398734
chr1_157359142_157359936	chr1	157359142	157359936	795	FCRL5	192579	CD14+ Monocyte	1.31582	1.84941	29.0012	1.67365e-06	0.00423263
chr17_59842610_59844660	chr17	59842610	59844660	2051	TUBD1	48283	CD14+ Monocyte	0.97793	4.59456	29.6283	1.72138e-06	0.00423263
chr19_11211874_11213742	chr19	11211874	11213742	1869	KANK2	14009	CD14+ Monocyte	1.50288	2.14786	28.9446	1.81729e-06	0.00434434
chr1_154575724_154578563	chr1	154575724	154578563	2840	CHRNB2	7947	CD14+ Monocyte	1.66066	2.18626	28.9025	1.98644e-06	0.00462035
chr19_11208065_11209195	chr19	11208065	11209195	1131	KANK2	10200	CD14+ Monocyte	1.15626	2.57159	28.8466	2.12822e-06	0.00481985
chr18_10366897_10368432	chr18	10366897	10368432	1536	LINC01254	45938	CD14+ Monocyte	-1.0906	1.94184	28.7115	2.25161e-06	0.00496856
chr17_19302904_19303402	chr17	19302904	19303402	499	EPN2-AS1	2859	CD14+ Monocyte	-1.13199	2.68667	28.6278	2.38531e-06	0.0050544
chr3_5053491_5053895	chr3	5053491	5053895	405	ARL8B	68396	CD14+ Monocyte	-1.28033	1.36586	28.0573	2.40798e-06	0.0050544
chr2_227020412_227020864	chr2	227020412	227020864	453	COL4A4	143341	CD14+ Monocyte	-1.9652	0.585039	26.9904	2.6372e-06	0.00540375
chr9_107603411_107604536	chr9	107603411	107604536	1126	KLF4	113642	CD14+ Monocyte	-1.01791	1.85874	27.9392	2.86426e-06	0.00573252
chr2_233063209_233063553	chr2	233063209	233063553	345	INPP5D	2868	CD14+ Monocyte	-1.00282	2.06266	27.5242	3.24899e-06	0.00619122
chr9_27352288_27353638	chr9	27352288	27353638	1351	EQTN	55138	CD14+ Monocyte	-0.93297	3.27584	27.5068	3.43912e-06	0.00619122
chr9_93669351_93673891	chr9	93669351	93673891	4541	PHF2	92768	CD14+ Monocyte	1.10397	3.93891	27.4582	3.49094e-06	0.00619122
chr22_24466699_24467512	chr22	24466699	24467512	814	ADORA2A-AS1	27562	CD14+ Monocyte	-1.00984	2.06009	27.3604	3.51329e-06	0.00619122
chr5_10681160_10682936	chr5	10681160	10682936	1777	DAP	78298	CD14+ Monocyte	-1.10084	1.78828	27.3394	3.53519e-06	0.00619122
chr15_50447684_50448824	chr15	50447684	50448824	1141	USP8	23280	CD14+ Monocyte	1.27005	2.79443	27.2451	3.64173e-06	0.00619122
chr6_5979693_5980453	chr6	5979693	5980453	761	NRN1	23591	CD14+ Monocyte	1.04928	3.97153	27.3111	3.65453e-06	0.00619122
chr11_67190076_67190901	chr11	67190076	67190901	826	KDM2A	49112	CD14+ Monocyte	1.08045	2.92452	27.057	3.69495e-06	0.00619122
chr1_32711163_32712768	chr1	32711163	32712768	1606	SYNC	8393	CD14+ Monocyte	0.777368	4.4587	27.2369	3.74092e-06	0.00619122
chr20_52682085_52682802	chr20	52682085	52682802	718	LINC01524	61248	CD14+ Monocyte	-0.780517	2.81493	27.1119	3.91777e-06	0.00636157
chr4_75030604_75031245	chr4	75030604	75031245	642	LINC02562	53463	CD14+ Monocyte	-1.58355	1.6683	26.8395	4.03012e-06	0.00642282
chr3_54967265_54968411	chr3	54967265	54968411	1147	LRTM1	163	CD14+ Monocyte	-0.828747	3.40756	26.8719	4.23575e-06	0.0066278
chr12_106740303_106741275	chr12	106740303	106741275	973	RIC8B	33406	CD14+ Monocyte	-1.46887	1.92538	26.5504	4.55909e-06	0.00700634
chr4_26873024_26874330	chr4	26873024	26874330	1307	STIM2	12184	CD14+ Monocyte	-1.13259	2.46049	26.5457	4.70071e-06	0.00709725
chr19_4313458_4314685	chr19	4313458	4314685	1228	FSD1	8861	CD14+ Monocyte	1.88598	1.68605	25.6285	5.0521e-06	0.00741969
chr19_49921978_49922240	chr19	49921978	49922240	263	ATF5	6461	CD14+ Monocyte	2.31994	1.11727	25.3297	5.0867e-06	0.00741969
chr2_152030685_152032091	chr2	152030685	152032091	1407	CACNB4	56707	CD14+ Monocyte	-0.885958	4.06174	26.2643	5.17493e-06	0.00742257
chr8_138253389_138254505	chr8	138253389	138254505	1117	KCNK9	1448618	CD14+ Monocyte	-1.52102	2.8015	26.162	5.36184e-06	0.00747203
chr8_17630088_17631101	chr8	17630088	17631101	1014	MTUS1	45400	CD14+ Monocyte	-1.53427	2.76256	26.1027	5.44745e-06	0.00747203
chr2_26492885_26494250	chr2	26492885	26494250	1366	OTOF	14761	CD14+ Monocyte	1.80055	4.41298	26.1041	5.46988e-06	0.00747203
chr16_1332829_1333847	chr16	1332829	1333847	1019	BAIAP3	203	CD14+ Monocyte	0.737075	3.09314	26.0401	5.58666e-06	0.00751231
chr12_10406554_10407337	chr12	10406554	10407337	784	KLRC4	2420	CD14+ Monocyte	-0.871523	3.2971	25.9299	5.80593e-06	0.00759277
chr21_41458961_41461190	chr21	41458961	41461190	2230	MX1	26912	CD14+ Monocyte	1.5864	2.8052	25.9049	5.82295e-06	0.00759277
chr3_63982041_63982771	chr3	63982041	63982771	731	ATXN7	14248	CD14+ Monocyte	-1.53218	0.907674	24.8948	6.20661e-06	0.00781568
chr1_1121898_1125672	chr1	1121898	1125672	3775	C1orf159	5809	CD14+ Monocyte	0.630039	4.32106	25.7034	6.24684e-06	0.00781568
chr15_66252317_66255231	chr15	66252317	66255231	2915	MEGF11	1433	CD14+ Monocyte	1.01532	2.62929	25.5964	6.42713e-06	0.00781568
chr8_41661145_41661498	chr8	41661145	41661498	354	ANK1	3776	CD14+ Monocyte	-1.35459	0.904185	24.7821	6.44043e-06	0.00781568
chr21_34813405_34814119	chr21	34813405	34814119	715	LINC01426	67581	CD14+ Monocyte	1.88437	2.52346	25.2967	6.44798e-06	0.00781568
chr4_85761446_85762438	chr4	85761446	85762438	993	ARHGAP24	16359	CD14+ Monocyte	-1.65557	1.66391	25.237	6.62054e-06	0.007828
chr22_32756945_32757952	chr22	32756945	32757952	1008	TIMP3	43752	CD14+ Monocyte	-3.71216	1.4514	24.5591	6.69616e-06	0.007828
chr20_63553019_63554202	chr20	63553019	63554202	1184	FNDC11	0	CD14+ Monocyte	1.06205	5.18983	25.4785	6.73103e-06	0.007828
chr6_125201815_125202568	chr6	125201815	125202568	754	TPD52L1	1142	CD14+ Monocyte	-1.26492	1.33677	24.7773	7.3603e-06	0.00812935
chr17_42475093_42476703	chr17	42475093	42476703	1611	ATP6V0A1	16216	CD14+ Monocyte	1.30062	1.6891	24.587	7.45592e-06	0.00812935
chr2_84832729_84833447	chr2	84832729	84833447	719	TRABD2A	47637	CD14+ Monocyte	-0.70346	3.52696	25.1061	7.66972e-06	0.00812935
chr2_190469027_190469628	chr2	190469027	190469628	602	MFSD6	136	CD14+ Monocyte	-1.5834	0.618217	24.0458	7.67719e-06	0.00812935
chr2_112811604_112812637	chr2	112811604	112812637	1034	IL1B	24142	CD14+ Monocyte	-0.94617	3.01152	25.0994	7.69832e-06	0.00812935
chr21_41423369_41424108	chr21	41423369	41424108	740	MX1	1922	CD14+ Monocyte	0.889824	3.67533	25.0696	7.76207e-06	0.00812935
chr6_39329842_39330785	chr6	39329842	39330785	944	KCNK17	15423	CD14+ Monocyte	-0.87345	2.77413	25.0701	7.809e-06	0.00812935
chr4_152357340_152357733	chr4	152357340	152357733	394	FBXW7	4514	CD14+ Monocyte	1.51667	1.93449	24.7386	7.89635e-06	0.00812935
chr5_76952928_76954686	chr5	76952928	76954686	1759	CRHBP	116	CD14+ Monocyte	1.54944	1.85431	24.4463	7.93476e-06	0.00812935
chr8_37691334_37691683	chr8	37691334	37691683	350	ZNF703	4098	CD14+ Monocyte	-1.24771	2.25903	24.9173	8.06079e-06	0.00816131
chr10_10460518_10460816	chr10	10460518	10460816	299	CELF2-DT	1533	CD14+ Monocyte	-1.63001	1.21915	24.6244	8.22018e-06	0.00822591
chr16_29177986_29178386	chr16	29177986	29178386	401	LAT	192935	CD14+ Monocyte	-1.41326	1.0312	23.8531	8.3217e-06	0.00823179
chr17_80384007_80388027	chr17	80384007	80388027	4021	ENDOV	27139	CD14+ Monocyte	1.26945	3.00834	24.8192	8.44405e-06	0.0082579
chr6_144017060_144017704	chr6	144017060	144017704	645	HYMAI	8330	CD14+ Monocyte	-1.26984	1.51099	24.4241	8.56934e-06	0.00828626
chr6_81797233_81798112	chr6	81797233	81798112	880	LINC01526	16080	CD14+ Monocyte	-1.03217	1.44468	24.3256	8.86972e-06	0.00848143
chr11_9738207_9739657	chr11	9738207	9739657	1451	SBF2-AS1	18635	CD14+ Monocyte	-1.91631	1.66363	24.2736	9.2311e-06	0.00851591
chr11_348263_348777	chr11	348263	348777	515	IFITM3	27403	CD14+ Monocyte	2.43976	1.56093	23.811	9.2847e-06	0.00851591
chr10_123402486_123403157	chr10	123402486	123403157	672	BUB3	248085	CD14+ Monocyte	-1.33111	1.31446	24.3187	9.35945e-06	0.00851591
chr6_112154260_112154818	chr6	112154260	112154818	559	FAM229B	66670	CD14+ Monocyte	4.10274	1.02447	23.5908	9.40261e-06	0.00851591
chr7_36784735_36785549	chr7	36784735	36785549	815	AOAH	60186	CD14+ Monocyte	-1.27293	3.32214	24.5019	9.41573e-06	0.00851591
chr1_36218001_36218761	chr1	36218001	36218761	761	THRAP3	5681	CD14+ Monocyte	1.13741	2.57915	24.4013	9.4995e-06	0.00851591
chr17_9974212_9975596	chr17	9974212	9975596	1385	GAS7	14717	CD14+ Monocyte	-1.02483	2.8631	24.4466	9.62804e-06	0.00854215
chr2_137963641_137964765	chr2	137963641	137964765	1125	HNMT	293	CD14+ Monocyte	-0.726072	3.02757	24.2498	1.03297e-05	0.00891579
chr2_26477073_26478374	chr2	26477073	26478374	1302	OTOF	250	CD14+ Monocyte	2.21234	2.38771	23.9424	1.036e-05	0.00891579
chr5_150541725_150542556	chr5	150541725	150542556	832	NDST1	33595	CD14+ Monocyte	1.95499	1.93039	23.5746	1.07739e-05	0.00918024
chr10_33661533_33662695	chr10	33661533	33662695	1163	LINC00838	109985	CD14+ Monocyte	-0.666506	4.41785	24.0104	1.11388e-05	0.00925279
chr15_30823149_30824077	chr15	30823149	30824077	929	FAN1	79774	CD14+ Monocyte	3.72162	2.10698	23.4766	1.11804e-05	0.00925279
chr15_89367350_89368195	chr15	89367350	89368195	846	MIR9-3HG	97	CD14+ Monocyte	1.04846	2.19339	23.8475	1.12532e-05	0.00925279
chr2_191622487_191623164	chr2	191622487	191623164	678	NABP1	54907	CD14+ Monocyte	-0.977623	2.26428	23.9365	1.12891e-05	0.00925279
chr9_77819269_77820812	chr9	77819269	77820812	1544	GNA14	170947	CD14+ Monocyte	1.06952	2.47448	23.7063	1.20126e-05	0.00967753
chr19_10878948_10879678	chr19	10878948	10879678	731	CARM1	6520	CD14+ Monocyte	0.859271	2.2879	23.6539	1.20323e-05	0.00967753
chr12_95132892_95133542	chr12	95132892	95133542	651	NR2C1	59274	CD14+ Monocyte	-0.8213	2.51386	23.7338	1.22688e-05	0.00971375
chr13_113187070_113187648	chr13	113187070	113187648	579	CUL4A	20544	CD14+ Monocyte	1.59025	3.47725	23.7187	1.2303e-05	0.00971375
chr12_94836756_94837643	chr12	94836756	94837643	888	NDUFA12	166054	CD14+ Monocyte	1.56034	1.2842	23.0963	1.26918e-05	0.00992962
chr17_74513957_74515081	chr17	74513957	74515081	1125	CD300LB	16394	CD14+ Monocyte	0.745904	5.18224	23.5768	1.29533e-05	0.0100429
chrX_47361696_47362477	chrX	47361696	47362477	782	ZNF157	8100	CD14+ Monocyte	-1.15438	3.45735	23.4552	1.35622e-05	0.0104211
chr19_10860785_10861578	chr19	10860785	10861578	794	CARM1	9974	CD14+ Monocyte	0.673244	3.93891	23.3027	1.4289e-05	0.0108824
chr10_124229919_124232383	chr10	124229919	124232383	2465	CHST15	136321	CD14+ Monocyte	1.20517	3.7664	23.2137	1.47485e-05	0.0110196
chr1_78648318_78648627	chr1	78648318	78648627	310	IFI44	1161	CD14+ Monocyte	2.40361	1.18356	22.458	1.47723e-05	0.0110196
chr12_109762846_109763689	chr12	109762846	109763689	844	FAM222A-AS1	9798	CD14+ Monocyte	1.38925	3.08728	23.1666	1.48532e-05	0.0110196
chr22_23137955_23138322	chr22	23137955	23138322	368	RSPH14	3668	CD14+ Monocyte	-0.85597	2.27394	23.157	1.50771e-05	0.01109
chr4_14864153_14865092	chr4	14864153	14865092	940	LINC00504	23077	CD14+ Monocyte	-1.02328	2.49292	23.1207	1.53337e-05	0.0111832
chr9_76358630_76359844	chr9	76358630	76359844	1215	RFK	34582	CD14+ Monocyte	-0.92109	2.93076	23.0123	1.58919e-05	0.011466
chr17_43608188_43608774	chr17	43608188	43608774	587	MEOX1	52789	CD14+ Monocyte	1.38608	3.83968	22.9844	1.59879e-05	0.011466
chr11_40086280_40087276	chr11	40086280	40087276	997	LRRC4C	205854	CD14+ Monocyte	-1.2961	1.6702	22.7918	1.61277e-05	0.0114707
chr20_34811804_34812439	chr20	34811804	34812439	636	NCOA6	9200	CD14+ Monocyte	1.58831	1.0284	22.2006	1.64288e-05	0.0115139
chr8_74295489_74296201	chr8	74295489	74296201	713	GDAP1	54181	CD14+ Monocyte	1.5319	2.26862	22.737	1.65417e-05	0.0115139
chr13_97223453_97224372	chr13	97223453	97224372	920	MBNL2	1121	CD14+ Monocyte	-0.576274	4.15404	22.8738	1.65898e-05	0.0115139
chr4_102877795_102879040	chr4	102877795	102879040	1246	CISD2	8804	CD14+ Monocyte	-1.36792	2.43836	22.8276	1.68419e-05	0.0115537
chr4_123616824_123617686	chr4	123616824	123617686	863	LINC01091	32304	CD14+ Monocyte	-0.534101	4.73954	22.8109	1.69422e-05	0.0115537
chr15_76335310_76336986	chr15	76335310	76336986	1677	ISL2	214	CD14+ Monocyte	0.53569	5.10796	22.7929	1.705e-05	0.0115537
chr2_241740091_241741573	chr2	241740091	241741573	1483	D2HGDH	5462	CD14+ Monocyte	2.14462	2.25605	22.2994	1.74681e-05	0.0117446
chr1_48229154_48229798	chr1	48229154	48229798	645	SLC5A9	6439	CD14+ Monocyte	-0.927928	1.84271	22.6507	1.77032e-05	0.0118104
chr11_45857788_45858708	chr11	45857788	45858708	921	CRY2	10314	CD14+ Monocyte	-1.67019	4.11927	22.5473	1.80716e-05	0.0119634
chr3_51738997_51739688	chr3	51738997	51739688	692	GRM2	31930	CD14+ Monocyte	-1.00899	1.39987	22.4252	1.83614e-05	0.0120625
chr20_9490642_9491796	chr20	9490642	9491796	1155	LAMP5	22561	CD14+ Monocyte	-1.00434	2.32495	22.5218	1.88297e-05	0.0121856
chr20_3681794_3682721	chr20	3681794	3682721	928	SIGLEC1	24513	CD14+ Monocyte	1.66264	1.0364	21.7211	1.8832e-05	0.0121856
chr22_38228698_38230586	chr22	38228698	38230586	1889	MAFF	25679	CD14+ Monocyte	0.843936	2.63788	22.3944	1.94138e-05	0.0124683
chr19_44760979_44761351	chr19	44760979	44761351	373	BCL3	12272	CD14+ Monocyte	1.64074	2.49698	22.2092	1.98277e-05	0.0126398
chr9_129746083_129746969	chr9	129746083	129746969	887	PTGES	6073	CD14+ Monocyte	-1.41546	0.937071	21.4611	2.04095e-05	0.0128389
chr10_10421031_10421804	chr10	10421031	10421804	774	CELF2-DT	40545	CD14+ Monocyte	-2.03162	0.710455	21.6332	2.04385e-05	0.0128389
chr12_22360659_22361311	chr12	22360659	22361311	653	ST8SIA1	25945	CD14+ Monocyte	-1.021	1.72986	22.1852	2.0608e-05	0.0128517
chr16_20691466_20691988	chr16	20691466	20691988	523	ACSM1	210	CD14+ Monocyte	-1.45095	1.71545	21.9358	2.14514e-05	0.0131865
chr7_112124161_112124943	chr7	112124161	112124943	783	DOCK4	81456	CD14+ Monocyte	-1.16738	1.45955	21.8657	2.20376e-05	0.01335
chr5_56876265_56876689	chr5	56876265	56876689	425	SETD9	32570	CD14+ Monocyte	1.71735	0.723031	21.2114	2.21547e-05	0.01335
chr1_48227343_48228528	chr1	48227343	48228528	1186	SLC5A9	4628	CD14+ Monocyte	-0.793797	3.0143	22.0684	2.21827e-05	0.01335
chr12_121018213_121018554	chr12	121018213	121018554	342	C12orf43	1726	CD14+ Monocyte	1.35056	2.77981	21.9315	2.25761e-05	0.0134923
chr3_112973423_112975511	chr3	112973423	112975511	2089	CD200R1	408	CD14+ Monocyte	-1.23013	2.41727	21.9935	2.27637e-05	0.0135107
chr2_113217251_113218901	chr2	113217251	113218901	1651	PAX8-AS1	16625	CD14+ Monocyte	-0.658739	3.28633	21.9361	2.32261e-05	0.0136595
chr1_34867366_34867941	chr1	34867366	34867941	576	SMIM12	7617	CD14+ Monocyte	-1.06995	2.4432	21.8667	2.33319e-05	0.0136595
chr19_4845334_4845587	chr19	4845334	4845587	254	TICAM1	13622	CD14+ Monocyte	2.49423	1.30184	21.158	2.35178e-05	0.0136753
chr8_127365785_127366516	chr8	127365785	127366516	732	POU5F1B	49308	CD14+ Monocyte	-1.27348	1.53817	21.7185	2.37611e-05	0.013724
chr5_66722703_66723216	chr5	66722703	66723216	514	MAST4	105556	CD14+ Monocyte	-1.04838	1.39593	21.54	2.48147e-05	0.0141563
chr22_46619896_46620439	chr22	46619896	46620439	544	GRAMD4	54	CD14+ Monocyte	-0.772056	2.89491	21.7133	2.51848e-05	0.0141563
chr20_35238022_35239237	chr20	35238022	35239237	1216	MMP24	11333	CD14+ Monocyte	1.54716	1.51709	21.2306	2.52891e-05	0.0141563
chr3_128867085_128867870	chr3	128867085	128867870	786	ACAD9	11619	CD14+ Monocyte	1.81814	2.3093	21.3984	2.54884e-05	0.0141563
chr8_123407433_123408167	chr8	123407433	123408167	735	ATAD2	10986	CD14+ Monocyte	1.55288	1.07963	21.0569	2.55123e-05	0.0141563
chr11_35057848_35059594	chr11	35057848	35059594	1747	CD44	79576	CD14+ Monocyte	-0.532776	3.64657	21.6529	2.56756e-05	0.0141563
chr3_16875993_16876768	chr3	16875993	16876768	776	PLCL2	8186	CD14+ Monocyte	-0.920168	2.85101	21.6524	2.57878e-05	0.0141563
chr2_102505320_102505569	chr2	102505320	102505569	250	IL18RAP	86531	CD14+ Monocyte	-1.69769	0.728739	21.0087	2.58255e-05	0.0141563
chr9_96020490_96021879	chr9	96020490	96021879	1390	LINC00092	68	CD14+ Monocyte	1.15144	2.24162	21.434	2.61891e-05	0.0141793
chr6_124539052_124539406	chr6	124539052	124539406	355	NKAIN2	256048	CD14+ Monocyte	-1.58463	0.982308	21.0885	2.65297e-05	0.0142697
chr17_1665125_1665743	chr17	1665125	1665743	619	RILP	15259	CD14+ Monocyte	1.11298	2.41552	21.4745	2.68596e-05	0.014325
chr18_23861835_23863376	chr18	23861835	23863376	1542	LAMA3	9643	CD14+ Monocyte	1.36339	2.338	21.3739	2.71244e-05	0.014325
chr2_109242865_109243085	chr2	109242865	109243085	221	SH3RF3-AS1	112746	CD14+ Monocyte	-1.46992	1.18091	21.0966	2.7132e-05	0.014325
chr3_42492022_42492933	chr3	42492022	42492933	912	VIPR1	2724	CD14+ Monocyte	-0.665294	3.19186	21.4858	2.733e-05	0.0143416
chr5_159405551_159406177	chr5	159405551	159406177	627	LINC01845	60099	CD14+ Monocyte	-1.38414	1.07274	21.0257	2.76843e-05	0.0144395
chr6_10531419_10532171	chr6	10531419	10532171	753	GCNT2	3050	CD14+ Monocyte	-0.70986	3.49667	21.4192	2.79591e-05	0.0144949
chr7_131218742_131220177	chr7	131218742	131220177	1436	MKLN1-AS	107602	CD14+ Monocyte	-0.783256	3.70965	21.3656	2.84695e-05	0.0146712
chr16_71564072_71565716	chr16	71564072	71565716	1645	TAT-AS1	72	CD14+ Monocyte	-0.817216	3.78779	21.3053	2.90929e-05	0.0148328
chr19_40613222_40614358	chr19	40613222	40614358	1137	LTBP4	11854	CD14+ Monocyte	0.578573	5.16495	21.2936	2.91444e-05	0.0148328
chr11_40099539_40100398	chr11	40099539	40100398	860	LRRC4C	192732	CD14+ Monocyte	-1.40883	0.756734	20.6171	2.93002e-05	0.0148328
chr15_42168189_42168823	chr15	42168189	42168823	635	VPS39	39481	CD14+ Monocyte	1.43648	1.46167	20.7544	2.96544e-05	0.0148573
chr20_3672639_3673246	chr20	3672639	3673246	608	SIGLEC1	33988	CD14+ Monocyte	1.42013	1.5571	20.8356	2.96939e-05	0.0148573
chr1_173111861_173112553	chr1	173111861	173112553	693	TNFSF18	60920	CD14+ Monocyte	-0.666931	3.85139	21.1889	3.03126e-05	0.0150792
chr3_138082655_138083365	chr3	138082655	138083365	711	DZIP1L	30115	CD14+ Monocyte	2.72259	1.25608	20.5226	3.0754e-05	0.0151579
chr7_69493825_69494691	chr7	69493825	69494691	867	CT66	102933	CD14+ Monocyte	-0.912068	2.45169	21.1421	3.09289e-05	0.0151579
chr14_59772391_59772875	chr14	59772391	59772875	485	RTN1	97901	CD14+ Monocyte	-1.51337	0.550563	20.5363	3.09993e-05	0.0151579
chr5_88732030_88732894	chr5	88732030	88732894	865	LINC00461	40989	CD14+ Monocyte	-0.662947	3.17689	21.0744	3.17262e-05	0.0153119
chr4_101833250_101833986	chr4	101833250	101833986	737	BANK1	19409	CD14+ Monocyte	-0.891774	1.79941	20.9572	3.17438e-05	0.0153119
chr2_11907128_11907802	chr2	11907128	11907802	675	MIR3681HG	99313	CD14+ Monocyte	-0.60434	3.46875	21.0588	3.18478e-05	0.0153119
chr22_29640784_29642147	chr22	29640784	29642147	1364	NF2	37152	CD14+ Monocyte	1.0665	2.62848	20.9277	3.25992e-05	0.0154849
chr15_75233285_75235826	chr15	75233285	75235826	2542	C15orf39	31404	CD14+ Monocyte	1.11061	2.42756	20.8633	3.29274e-05	0.0154849
chr10_131849893_131852967	chr10	131849893	131852967	3075	PPP2R2D	48040	CD14+ Monocyte	1.7431	1.73356	20.5073	3.32743e-05	0.015563
chr14_74175724_74177058	chr14	74175724	74177058	1335	LIN52	90769	CD14+ Monocyte	0.916439	3.0429	20.8851	3.40163e-05	0.0157618
chr19_15702160_15703156	chr19	15702160	15703156	997	CYP4F12	29074	CD14+ Monocyte	-1.04261	1.84607	20.7953	3.40657e-05	0.0157618
chr6_37059323_37060549	chr6	37059323	37060549	1227	FGD2	53669	CD14+ Monocyte	1.47748	2.79185	20.7606	3.46476e-05	0.0159453
chr19_10292071_10293181	chr19	10292071	10293181	1111	ICAM5	2120	CD14+ Monocyte	0.76882	4.79444	20.7491	3.55394e-05	0.0160673
chr14_35020481_35020986	chr14	35020481	35020986	506	FAM177A1	23920	CD14+ Monocyte	-1.53623	0.704929	20.1928	3.56544e-05	0.0160673
chr2_26486750_26487828	chr2	26486750	26487828	1079	OTOF	8626	CD14+ Monocyte	2.16312	1.33883	20.1915	3.56946e-05	0.0160673
chr8_676793_677435	chr8	676793	677435	643	ERICH1	53789	CD14+ Monocyte	1.21089	3.16242	20.6883	3.61926e-05	0.0160673
chr8_29752299_29752855	chr8	29752299	29752855	557	LINC02099	3991	CD14+ Monocyte	-0.845587	2.20369	20.6886	3.64733e-05	0.0160673
chr5_1516091_1517559	chr5	1516091	1517559	1469	LPCAT1	6401	CD14+ Monocyte	-0.70514	3.29506	20.6828	3.65858e-05	0.0160673
chr21_41377372_41378370	chr21	41377372	41378370	999	MX2	15346	CD14+ Monocyte	1.90376	1.07511	19.9878	3.66093e-05	0.0160673
chr2_25280424_25280691	chr2	25280424	25280691	268	DNMT3A	28109	CD14+ Monocyte	-1.00497	1.97902	20.5967	3.66308e-05	0.0160673
chr17_77233643_77234278	chr17	77233643	77234278	636	SEPTIN9	47220	CD14+ Monocyte	1.63822	1.7155	20.251	3.67085e-05	0.0160673
chr19_42363719_42364201	chr19	42363719	42364201	483	CNFN	26096	CD14+ Monocyte	-1.21724	1.40312	20.4603	3.68728e-05	0.0160673
chr22_38843152_38844558	chr22	38843152	38844558	1407	NPTXR	530	CD14+ Monocyte	0.697051	3.39221	20.6427	3.71364e-05	0.0160673
chr3_124829516_124830546	chr3	124829516	124830546	1031	ITGB5	56819	CD14+ Monocyte	-0.823582	3.37645	20.6354	3.71531e-05	0.0160673
chr16_81711683_81714086	chr16	81711683	81714086	2404	PLCG2	65204	CD14+ Monocyte	1.04054	2.41565	20.5697	3.74001e-05	0.0160933
chr1_39047619_39048230	chr1	39047619	39048230	612	NDUFS5	21270	CD14+ Monocyte	2.53548	1.26689	19.9467	3.82457e-05	0.0163753
chr9_36158097_36158462	chr9	36158097	36158462	366	CCIN	10925	CD14+ Monocyte	-0.808505	2.08975	20.4369	3.86973e-05	0.0164866
chr1_53555593_53557664	chr1	53555593	53557664	2072	LINC01771	227361	CD14+ Monocyte	1.78039	1.5669	20.0357	3.89592e-05	0.0165164
chr11_121898884_121899384	chr11	121898884	121899384	501	MIR100HG	201462	CD14+ Monocyte	-1.31057	0.849785	19.9842	3.97258e-05	0.0166418
chr19_19187421_19187635	chr19	19187421	19187635	215	BORCS8	4517	CD14+ Monocyte	2.12444	1.67305	19.9463	4.00137e-05	0.0166418
chr8_47632763_47633597	chr8	47632763	47633597	835	SPIDR	20490	CD14+ Monocyte	-1.04933	1.92722	20.3544	4.00275e-05	0.0166418
chr1_35783978_35784821	chr1	35783978	35784821	844	CLSPN	14000	CD14+ Monocyte	1.34066	1.05345	19.8225	4.00285e-05	0.0166418
chr5_150081714_150083462	chr5	150081714	150083462	1749	CSF1R	3092	CD14+ Monocyte	-0.582771	3.97026	20.3982	4.04715e-05	0.0166454
chr17_43655545_43656908	chr17	43655545	43656908	1364	MEOX1	4655	CD14+ Monocyte	0.975393	2.67941	20.3311	4.05166e-05	0.0166454
chr12_49821119_49821524	chr12	49821119	49821524	406	NCKAP5L	6889	CD14+ Monocyte	-0.9987	2.40339	20.3434	4.06173e-05	0.0166454
chr12_121036792_121037005	chr12	121036792	121037005	214	OASL	2237	CD14+ Monocyte	1.39433	1.95748	20.1417	4.09324e-05	0.0166723
chr1_65765507_65766081	chr1	65765507	65766081	575	PDE4B	26428	CD14+ Monocyte	1.31953	1.80924	20.2046	4.10705e-05	0.0166723
chr8_47525837_47526974	chr8	47525837	47526974	1138	SPIDR	127113	CD14+ Monocyte	-0.613109	3.85202	20.3152	4.1732e-05	0.0168613
chr1_1869283_1870317	chr1	1869283	1870317	1035	GNB1	20770	CD14+ Monocyte	0.53258	3.54016	20.2844	4.23064e-05	0.0170135
chr3_185340532_185341183	chr3	185340532	185341183	652	MAP3K13	21952	CD14+ Monocyte	1.1865	1.48535	19.8593	4.28418e-05	0.0170591
chr2_37154955_37155201	chr2	37154955	37155201	247	EIF2AK2	1779	CD14+ Monocyte	1.69284	0.978393	19.561	4.29651e-05	0.0170591
chr6_166942597_166943460	chr6	166942597	166943460	864	RNASET2	13090	CD14+ Monocyte	1.89447	1.23598	19.5855	4.35576e-05	0.0170591
chr1_999684_1001166	chr1	999684	1001166	1483	HES4	413	CD14+ Monocyte	1.07725	5.07103	20.1939	4.35868e-05	0.0170591
chr14_92677010_92677548	chr14	92677010	92677548	539	LGMN	71079	CD14+ Monocyte	-0.80352	2.87939	20.197	4.37119e-05	0.0170591
chr17_78324005_78325586	chr17	78324005	78325586	1582	SOCS3	34081	CD14+ Monocyte	-0.716306	4.35475	20.1779	4.38304e-05	0.0170591
chr2_47083107_47084868	chr2	47083107	47084868	1762	STPG4	70440	CD14+ Monocyte	-0.754866	3.29648	20.1905	4.38346e-05	0.0170591
chr5_131257366_131258298	chr5	131257366	131258298	933	CDC42SE2	5754	CD14+ Monocyte	-0.707566	2.75026	20.1753	4.41055e-05	0.0170591
chr19_17403193_17403716	chr19	17403193	17403716	524	BST2	1914	CD14+ Monocyte	1.01913	3.12027	20.1561	4.42038e-05	0.0170591
chr5_58751130_58751556	chr5	58751130	58751556	427	RAB3C	168056	CD14+ Monocyte	1.99927	0.967762	19.5193	4.48615e-05	0.0172356
chr12_10395071_10396020	chr12	10395071	10396020	950	KLRK1	5030	CD14+ Monocyte	-0.630784	3.71506	20.0875	4.53863e-05	0.0173231
chr12_108907944_108908308	chr12	108907944	108908308	365	DAO	27853	CD14+ Monocyte	-1.07015	1.99604	20.0219	4.55453e-05	0.0173231
chr16_56847037_56848470	chr16	56847037	56848470	1434	SLC12A3	16736	CD14+ Monocyte	0.976347	2.04265	20.0084	4.56929e-05	0.0173231
chr9_136978014_136978980	chr9	136978014	136978980	967	PTGDS	511	CD14+ Monocyte	0.996899	4.06775	20.0397	4.61975e-05	0.0174375
chr3_122609772_122610653	chr3	122609772	122610653	882	PARP15	4961	CD14+ Monocyte	1.76227	2.22601	19.7892	4.68581e-05	0.0176096
chr12_122464044_122465336	chr12	122464044	122465336	1293	ZCCHC8	35596	CD14+ Monocyte	0.767695	3.72545	19.9298	4.82168e-05	0.0179952
chr5_79106808_79107758	chr5	79106808	79107758	951	BHMT	4050	CD14+ Monocyte	-0.978209	2.159	19.9149	4.84197e-05	0.0179952
chr4_184357815_184358117	chr4	184357815	184358117	303	LINC02363	3838	CD14+ Monocyte	1.50511	1.84808	19.6641	4.85115e-05	0.0179952
chr9_77806992_77807719	chr9	77806992	77807719	728	GNA14	158670	CD14+ Monocyte	1.36417	2.36262	19.7486	4.9036e-05	0.0180903
chr2_47752118_47753147	chr2	47752118	47753147	1030	MSH6	29934	CD14+ Monocyte	0.56699	4.3592	19.8618	4.92657e-05	0.0180903
chr2_37189421_37190746	chr2	37189421	37190746	1326	CEBPZOS	5749	CD14+ Monocyte	1.0062	3.0871	19.8438	4.97359e-05	0.0180903
chr18_13464558_13465983	chr18	13464558	13465983	1426	LDLRAD4-AS1	37024	CD14+ Monocyte	-0.527116	4.03088	19.8224	5.00223e-05	0.0180903
chr13_74290302_74290758	chr13	74290302	74290758	457	LINC00402	58859	CD14+ Monocyte	-1.22669	2.2674	19.8226	5.0029e-05	0.0180903
chr1_78622585_78623147	chr1	78622585	78623147	563	IFI44L	2138	CD14+ Monocyte	1.73299	1.16747	19.249	5.02795e-05	0.0181048
chr10_88731087_88731750	chr10	88731087	88731750	664	LIPN	28269	CD14+ Monocyte	-0.971526	2.20305	19.7892	5.08033e-05	0.0181849
chr6_167391934_167393331	chr6	167391934	167393331	1398	TTLL2	66849	CD14+ Monocyte	2.25127	0.975632	19.1773	5.09992e-05	0.0181849
chr1_62800410_62801378	chr1	62800410	62801378	969	ATG4C	16279	CD14+ Monocyte	-0.555247	3.84089	19.7637	5.11358e-05	0.0181849
chr17_21542751_21543332	chr17	21542751	21543332	582	LINC02693	8346	CD14+ Monocyte	-1.49018	1.78535	19.5229	5.15922e-05	0.0182717
chr14_89445319_89445977	chr14	89445319	89445977	659	FOXN3-AS1	27966	CD14+ Monocyte	-0.700633	2.96996	19.6835	5.28477e-05	0.0186396
chr2_226875277_226876238	chr2	226875277	226876238	962	RHBDD1	39224	CD14+ Monocyte	-1.02879	2.76814	19.6358	5.34967e-05	0.0186812
chr9_129790108_129790883	chr9	129790108	129790883	776	TOR1B	12259	CD14+ Monocyte	0.691161	3.15527	19.6484	5.35818e-05	0.0186812
chr13_33797502_33798339	chr13	33797502	33798339	838	RFC3	19729	CD14+ Monocyte	-0.950998	2.48483	19.6476	5.36167e-05	0.0186812
chr7_40598777_40600414	chr7	40598777	40600414	1638	SUGCT	463773	CD14+ Monocyte	-0.778107	2.20238	19.559	5.54685e-05	0.0190481
chr7_47186148_47186781	chr7	47186148	47186781	634	TNS3	395330	CD14+ Monocyte	-1.31077	1.83624	19.4579	5.55015e-05	0.0190481
chr2_190953646_190954929	chr2	190953646	190954929	1284	STAT1	59242	CD14+ Monocyte	1.79939	1.27509	19.072	5.55347e-05	0.0190481
chr3_117449721_117450316	chr3	117449721	117450316	596	LINC02024	240609	CD14+ Monocyte	-1.18722	1.23571	19.2521	5.55552e-05	0.0190481
chr19_55062760_55063481	chr19	55062760	55063481	722	RDH13	333	CD14+ Monocyte	0.510434	5.14484	19.4822	5.66813e-05	0.0193571
chr15_58506218_58507248	chr15	58506218	58507248	1031	LIPC-AS1	7483	CD14+ Monocyte	1.04854	3.17949	19.4719	5.69373e-05	0.0193677
chr6_33375031_33376601	chr6	33375031	33376601	1571	KIFC1	15221	CD14+ Monocyte	0.717427	4.06752	19.4636	5.72449e-05	0.0193952
chr4_5019255_5019873	chr4	5019255	5019873	619	CYTL1	203	CD14+ Monocyte	-1.06748	0.940357	19.0845	5.74689e-05	0.0193952
chr6_317787_318391	chr6	317787	318391	605	DUSP22	25731	CD14+ Monocyte	-1.22722	1.44508	19.1073	5.83691e-05	0.0195736
chr3_55623913_55624872	chr3	55623913	55624872	960	ERC2-IT1	34597	CD14+ Monocyte	-0.628861	4.05423	19.3902	5.87337e-05	0.0195736
chr5_157272972_157273696	chr5	157272972	157273696	725	CYFIP2	3649	CD14+ Monocyte	0.505246	4.13784	19.3629	5.93372e-05	0.0195736
chr18_12890056_12890916	chr18	12890056	12890916	861	PTPN2	5721	CD14+ Monocyte	1.39221	1.9996	19.1275	5.93467e-05	0.0195736
chr11_115912145_115913360	chr11	115912145	115913360	1216	LINC00900	151945	CD14+ Monocyte	-1.01224	2.712	19.3672	5.94609e-05	0.0195736
chr1_155511401_155511858	chr1	155511401	155511858	458	ASH1L-AS1	50183	CD14+ Monocyte	1.54271	1.67035	18.9568	5.95549e-05	0.0195736
chr1_26287092_26287278	chr1	26287092	26287278	187	SH3BGRL3	7007	CD14+ Monocyte	-0.81688	2.54079	19.2957	6.0279e-05	0.0195736
chr8_141539875_141541994	chr8	141539875	141541994	2120	PTP4A3	118488	CD14+ Monocyte	1.35538	3.11774	19.3036	6.03905e-05	0.0195736
chr5_111693898_111694838	chr5	111693898	111694838	941	NREP	61413	CD14+ Monocyte	2.27161	1.85232	18.9143	6.1113e-05	0.0195736
chr2_127170717_127171574	chr2	127170717	127171574	858	CYP27C1	34193	CD14+ Monocyte	-1.54573	1.08336	18.9534	6.1207e-05	0.0195736
chr18_13222086_13223139	chr18	13222086	13223139	1054	LDLRAD4	3327	CD14+ Monocyte	-0.88851	2.97738	19.2887	6.1305e-05	0.0195736
chr13_74299123_74300723	chr13	74299123	74300723	1601	LINC00402	67680	CD14+ Monocyte	-1.11378	2.67973	19.2852	6.14169e-05	0.0195736
chr2_224937653_224939143	chr2	224937653	224939143	1491	DOCK10	7906	CD14+ Monocyte	-0.955653	2.37303	19.2645	6.16366e-05	0.0195736
chr21_15224244_15224781	chr21	15224244	15224781	538	NRIP1	159244	CD14+ Monocyte	1.17417	3.58268	19.2669	6.16874e-05	0.0195736
chr11_279179_281698	chr11	279179	281698	2520	NLRP6	610	CD14+ Monocyte	0.716931	3.98597	19.2601	6.17249e-05	0.0195736
chr17_15883588_15884272	chr17	15883588	15884272	685	ADORA2B	60644	CD14+ Monocyte	0.729594	4.312	19.2554	6.17612e-05	0.0195736
chr11_67989759_67991369	chr11	67989759	67991369	1611	UNC93B1	12728	CD14+ Monocyte	1.16098	2.70372	19.1599	6.24646e-05	0.0195736
chr6_11218524_11219721	chr6	11218524	11219721	1198	NEDD9	12947	CD14+ Monocyte	-0.922993	3.52168	19.2238	6.25719e-05	0.0195736
chr8_37629876_37630604	chr8	37629876	37630604	729	ZNF703	65177	CD14+ Monocyte	-0.888122	2.44934	19.2117	6.26978e-05	0.0195736
chr6_167090199_167090491	chr6	167090199	167090491	293	CCR6	21315	CD14+ Monocyte	-0.806046	2.23923	19.2223	6.27055e-05	0.0195736
chr3_34364277_34364820	chr3	34364277	34364820	544	PDCD6IP	565648	CD14+ Monocyte	-0.982887	2.11114	19.194	6.27739e-05	0.0195736
chr19_55080114_55082036	chr19	55080114	55082036	1923	EPS8L1	277	CD14+ Monocyte	0.665246	5.59166	19.1695	6.36995e-05	0.0197897
chrX_149476125_149476934	chrX	149476125	149476934	810	IDS	28372	CD14+ Monocyte	-1.42723	1.07261	18.4906	6.39269e-05	0.0197897
chr9_131357802_131358232	chr9	131357802	131358232	431	PRRC2B	15418	CD14+ Monocyte	1.54134	1.52478	18.8237	6.47903e-05	0.0199851
chr16_90031693_90032870	chr16	90031693	90032870	1178	GAS8-AS1	1792	CD14+ Monocyte	0.741528	3.95599	19.1007	6.55615e-05	0.0201394
chr3_144028523_144029515	chr3	144028523	144029515	993	DIPK2A	55443	CD14+ Monocyte	-0.568899	3.51584	19.0884	6.58248e-05	0.0201394
chr16_69402227_69402897	chr16	69402227	69402897	671	TERF2	16220	CD14+ Monocyte	-0.980229	1.66253	18.9403	6.65288e-05	0.0201394
chr1_15146190_15147486	chr1	15146190	15147486	1297	TMEM51-AS1	4978	CD14+ Monocyte	0.886992	2.54437	19.0288	6.66786e-05	0.0201394
chr4_48674930_48675636	chr4	48674930	48675636	707	FRYL	104643	CD14+ Monocyte	2.53373	0.753955	18.4246	6.67863e-05	0.0201394
chr15_76190475_76191606	chr15	76190475	76191606	1132	ETFA	119863	CD14+ Monocyte	0.71748	2.93711	19.0556	6.68448e-05	0.0201394
chr4_74932756_74934636	chr4	74932756	74934636	1881	PARM1	359	CD14+ Monocyte	-1.18146	1.78342	18.9784	6.70718e-05	0.0201394
chr11_72741459_72742397	chr11	72741459	72742397	939	ARAP1	9992	CD14+ Monocyte	-0.534661	4.4527	19.0294	6.72123e-05	0.0201394
chr12_94983218_94984609	chr12	94983218	94984609	1392	NDUFA12	19088	CD14+ Monocyte	1.76756	1.4205	18.7009	6.75542e-05	0.0201394
chr19_45781725_45782180	chr19	45781725	45782180	456	DMPK	310	CD14+ Monocyte	1.6726	1.2908	18.5711	6.76305e-05	0.0201394
chr2_43366823_43367305	chr2	43366823	43367305	483	LINC01126	139613	CD14+ Monocyte	-0.954734	1.53326	18.8821	6.84156e-05	0.0203029
chr6_312870_313633	chr6	312870	313633	764	DUSP22	20814	CD14+ Monocyte	-0.819902	3.50165	18.9411	6.96713e-05	0.0206045
chr7_75967213_75968021	chr7	75967213	75968021	809	TMEM120A	26574	CD14+ Monocyte	-0.812703	2.67173	18.868	7.1558e-05	0.02109
chr1_78619466_78620961	chr1	78619466	78620961	1496	IFI44L	514	CD14+ Monocyte	1.22461	2.53246	18.725	7.194e-05	0.0211302
chr5_6736666_6737774	chr5	6736666	6737774	1109	TENT4A	23235	CD14+ Monocyte	2.03167	1.72351	18.4394	7.23753e-05	0.0211858
chr8_133321007_133322121	chr8	133321007	133322121	1115	NDRG1	23755	CD14+ Monocyte	-1.20157	1.42287	18.6785	7.29522e-05	0.0212823
chr1_169608246_169608629	chr1	169608246	169608629	384	SELP	21495	CD14+ Monocyte	-0.752347	2.79022	18.7927	7.38275e-05	0.0213926
chr7_2076374_2077152	chr7	2076374	2077152	779	MAD1L1	135803	CD14+ Monocyte	1.50319	3.69744	18.7646	7.42739e-05	0.0214497
chr1_212813621_212813864	chr1	212813621	212813864	244	TATDN3	21728	CD14+ Monocyte	1.42642	1.14457	18.2531	7.45944e-05	0.0214702
chr8_100379898_100380434	chr8	100379898	100380434	537	RNF19A	43694	CD14+ Monocyte	-1.47482	1.23302	18.5467	7.52382e-05	0.0215688
chrX_109475098_109476021	chrX	109475098	109476021	924	GUCY2F	6065	CD14+ Monocyte	-1.02562	1.31073	18.552	7.54382e-05	0.0215688
chr7_32727777_32729386	chr7	32727777	32729386	1610	LINC00997	28899	CD14+ Monocyte	0.725377	3.32778	18.7157	7.59314e-05	0.0216142
chr10_97069746_97070372	chr10	97069746	97070372	627	SLIT1-AS1	32383	CD14+ Monocyte	2.09707	1.21858	18.3005	7.60994e-05	0.0216142
chr19_1455418_1456268	chr19	1455418	1456268	851	APC2	2435	CD14+ Monocyte	0.933159	4.04943	18.645	7.7819e-05	0.0219772
chr11_124731885_124732793	chr11	124731885	124732793	909	NRGN	7148	CD14+ Monocyte	-0.652882	3.32605	18.6447	7.78882e-05	0.0219772
chr6_6008453_6009388	chr6	6008453	6009388	936	NRN1	848	CD14+ Monocyte	1.23001	3.2786	18.6049	7.87594e-05	0.0220682
chr20_23333916_23334901	chr20	23333916	23334901	986	NXT1	15889	CD14+ Monocyte	1.10867	2.49908	18.6127	7.88696e-05	0.0220682
chr2_22280957_22281645	chr2	22280957	22281645	689	KLHL29	1103533	CD14+ Monocyte	-1.08757	2.67489	18.6122	7.89797e-05	0.0220682
chr7_137899218_137899745	chr7	137899218	137899745	528	CREB3L2	33243	CD14+ Monocyte	-0.604069	3.43307	18.5855	7.95854e-05	0.0221654
chr17_65013606_65014493	chr17	65013606	65014493	888	GNA13	41281	CD14+ Monocyte	1.03129	2.21434	18.4284	8.11779e-05	0.022524
chr6_109458845_109459284	chr6	109458845	109459284	440	MICAL1	2858	CD14+ Monocyte	-0.83383	2.95331	18.5208	8.13961e-05	0.022524
chr7_95595915_95597184	chr7	95595915	95597184	1270	PDK4	601	CD14+ Monocyte	-0.77502	4.54632	18.4968	8.21164e-05	0.0225456
chr17_41633557_41635552	chr17	41633557	41635552	1996	KRT17	8982	CD14+ Monocyte	1.353	1.62474	18.2259	8.22657e-05	0.0225456
chr19_991418_992065	chr19	991418	992065	648	WDR18	7074	CD14+ Monocyte	0.996168	4.04944	18.4833	8.25778e-05	0.0225456
chr1_24321494_24323022	chr1	24321494	24323022	1529	GRHL3	17	CD14+ Monocyte	0.682084	3.11191	18.4792	8.28944e-05	0.0225456
chr10_23373949_23374719	chr10	23373949	23374719	771	OTUD1	64355	CD14+ Monocyte	1.57363	1.89728	18.3008	8.29128e-05	0.0225456
chr19_47446918_47448172	chr19	47446918	47448172	1255	SLC8A2	23721	CD14+ Monocyte	1.01719	3.19831	18.4653	8.30463e-05	0.0225456
chr4_176089482_176090755	chr4	176089482	176090755	1274	WDR17	23642	CD14+ Monocyte	-0.68295	3.4001	18.4521	8.37572e-05	0.0226671
chr2_234571621_234572655	chr2	234571621	234572655	1035	ARL4C	74540	CD14+ Monocyte	-0.934328	2.70914	18.375	8.63794e-05	0.0233035
chr14_21317184_21317857	chr14	21317184	21317857	674	RPGRIP1	305	CD14+ Monocyte	-0.698602	2.76145	18.3513	8.73175e-05	0.023426
chr17_45430905_45431973	chr17	45430905	45431973	1069	ARHGAP27	897	CD14+ Monocyte	0.673064	4.18208	18.329	8.76501e-05	0.023426
chr19_12832358_12833067	chr19	12832358	12833067	710	MAST1	5447	CD14+ Monocyte	0.722456	2.92428	18.324	8.79513e-05	0.0234337
chr16_20916522_20917259	chr16	20916522	20917259	738	LYRM1	15261	CD14+ Monocyte	-0.976031	1.44532	18.1141	8.92302e-05	0.0237011
chr13_90713514_90713902	chr13	90713514	90713902	389	LINC00410	212695	CD14+ Monocyte	-1.59836	1.08624	18.0403	8.96914e-05	0.0237503
chr1_16012522_16013655	chr1	16012522	16013655	1134	SRARP	8287	CD14+ Monocyte	0.828265	3.2796	18.2425	9.0825e-05	0.02393
chr1_59318380_59319272	chr1	59318380	59319272	893	FGGY	8349	CD14+ Monocyte	-1.57178	1.75958	18.1648	9.09711e-05	0.02393
chr11_68383731_68384533	chr11	68383731	68384533	803	LRP5	71141	CD14+ Monocyte	1.02961	1.77228	18.1462	9.12043e-05	0.02393
chr20_53759791_53760218	chr20	53759791	53760218	428	ZNF217	165952	CD14+ Monocyte	-1.15792	1.56699	17.9873	9.17661e-05	0.0240042
chr11_76265926_76267103	chr11	76265926	76267103	1178	WNT11	59424	CD14+ Monocyte	1.74165	1.92632	17.851	9.25838e-05	0.0241302
chr3_47347000_47347968	chr3	47347000	47347968	969	PTPN23	33052	CD14+ Monocyte	-0.659191	2.80316	18.1878	9.28083e-05	0.0241302
chr16_29155166_29155398	chr16	29155166	29155398	233	LAT	170115	CD14+ Monocyte	-1.79831	1.75971	17.9354	9.46841e-05	0.0245437
chr8_108569552_108569919	chr8	108569552	108569919	368	EMC2	125929	CD14+ Monocyte	-1.38325	0.838401	17.6874	9.62754e-05	0.0248077
chr5_88826940_88827737	chr5	88826940	88827737	798	MEF2C	248	CD14+ Monocyte	-0.56356	4.24971	18.0744	9.64747e-05	0.0248077
chr10_13857445_13858064	chr10	13857445	13858064	620	FRMD4A	113832	CD14+ Monocyte	-1.24738	0.617522	17.48	9.7193e-05	0.0248545
chr1_4652573_4653001	chr1	4652573	4653001	429	AJAP1	1607	CD14+ Monocyte	-1.32514	0.635895	17.7623	9.73269e-05	0.0248545
chr6_167079677_167080479	chr6	167079677	167080479	803	CCR6	31327	CD14+ Monocyte	-0.923387	3.45761	18.0278	9.83618e-05	0.0249712
chr12_112828313_112829040	chr12	112828313	112829040	728	RPH3A	36566	CD14+ Monocyte	1.23609	1.38948	17.7438	9.83643e-05	0.0249712
chr11_65487287_65488249	chr11	65487287	65488249	963	MALAT1	9488	CD14+ Monocyte	-0.586452	4.65302	18.0007	9.91933e-05	0.0251076
chr11_35110865_35111677	chr11	35110865	35111677	813	CD44	27493	CD14+ Monocyte	-0.670622	2.58246	17.9616	0.000101097	0.0254125
chr7_150609800_150610781	chr7	150609800	150610781	982	GIMAP6	21604	CD14+ Monocyte	3.55579	0.948334	17.4232	0.000101488	0.0254125
chr11_60241052_60241371	chr11	60241052	60241371	320	MS4A4E	1766	CD14+ Monocyte	1.71408	0.646444	17.4212	0.000101813	0.0254125
chr1_236394860_236396099	chr1	236394860	236396099	1240	EDARADD	552	CD14+ Monocyte	1.31984	1.75593	17.7072	0.000102029	0.0254125
chr15_51359684_51360781	chr15	51359684	51360781	1098	GLDN	16464	CD14+ Monocyte	1.55348	1.82912	17.6709	0.000102168	0.0254125
chr8_121382506_121383315	chr8	121382506	121383315	810	HAS2-AS1	256030	CD14+ Monocyte	-0.989212	2.04506	17.896	0.0001026	0.0254125
chr6_32113388_32114380	chr6	32113388	32114380	993	TNXB	4050	CD14+ Monocyte	-1.01536	1.8364	17.8569	0.000102606	0.0254125
chr3_119300607_119302208	chr3	119300607	119302208	1602	ARHGAP31	6225	CD14+ Monocyte	-0.655555	3.83981	17.9126	0.00010276	0.0254125
chr6_87824790_87826408	chr6	87824790	87826408	1619	AKIRIN2	122557	CD14+ Monocyte	-0.669965	3.64065	17.905	0.000103071	0.0254163
chr12_52132480_52133437	chr12	52132480	52133437	958	SMIM41	52777	CD14+ Monocyte	1.16439	2.49413	17.7758	0.000104163	0.0256121
chr13_109161977_109162714	chr13	109161977	109162714	738	MYO16-AS1	4589	CD14+ Monocyte	-0.651166	3.05925	17.8552	0.000105228	0.0258003
chr6_33702365_33702654	chr6	33702365	33702654	290	UQCC2	9046	CD14+ Monocyte	1.87543	0.722118	17.1744	0.000105668	0.0258346
chr12_120719655_120721017	chr12	120719655	120721017	1363	ACADS	4808	CD14+ Monocyte	0.87276	2.46558	17.7887	0.000106239	0.0258764
chr22_38135234_38135761	chr22	38135234	38135761	528	BAIAP2L2	24550	CD14+ Monocyte	1.9398	0.840027	17.3477	0.00010644	0.0258764
chr10_133056771_133059263	chr10	133056771	133059263	2493	LINC01168	91238	CD14+ Monocyte	1.19944	1.91064	17.6593	0.000107148	0.025975
chr20_3071662_3072744	chr20	3071662	3072744	1083	OXT	43	CD14+ Monocyte	0.776845	2.74701	17.7915	0.000108115	0.0260631
chr19_44764096_44764543	chr19	44764096	44764543	448	BCL3	15389	CD14+ Monocyte	0.76344	3.13416	17.747	0.000108693	0.0260631
chr17_80363328_80364589	chr17	80363328	80364589	1262	ENDOV	50577	CD14+ Monocyte	1.34105	1.49148	17.5255	0.000108866	0.0260631
chr5_113047298_113048483	chr5	113047298	113048483	1186	DCP2	70501	CD14+ Monocyte	-0.711835	3.51088	17.761	0.00010897	0.0260631
chr3_126398970_126399982	chr3	126398970	126399982	1013	CFAP100	4062	CD14+ Monocyte	1.38663	2.26376	17.6534	0.000109335	0.0260631
chr11_1731974_1735533	chr11	1731974	1735533	3560	IFITM10	15062	CD14+ Monocyte	1.0352	2.74406	17.6687	0.000109464	0.0260631
chr19_19540033_19541590	chr19	19540033	19541590	1558	CILP2	1769	CD14+ Monocyte	0.694713	4.32684	17.7394	0.000109757	0.0260631
chr15_90896679_90897578	chr15	90896679	90897578	900	MAN2A2	4803	CD14+ Monocyte	-0.700939	3.26357	17.7416	0.000109934	0.0260631
chr7_105193166_105193561	chr7	105193166	105193561	396	SRPK2	75516	CD14+ Monocyte	-1.18751	1.008	17.3897	0.000110412	0.0261046
chr8_43145491_43146333	chr8	43145491	43146333	843	HGSNAT	5028	CD14+ Monocyte	-0.688985	2.83859	17.7253	0.000110733	0.0261088
chr2_6880303_6880662	chr2	6880303	6880662	360	RSAD2	2527	CD14+ Monocyte	1.8077	1.07283	17.2731	0.00011158	0.0262365
chr19_43688306_43688712	chr19	43688306	43688712	407	PLAUR	17960	CD14+ Monocyte	1.0171	2.98081	17.6638	0.000112409	0.0263595
chr1_92466808_92467358	chr1	92466808	92467358	551	GFI1	16596	CD14+ Monocyte	-1.12309	1.28928	17.3335	0.000114213	0.0266051
chr2_117980734_117981607	chr2	117980734	117981607	874	CCDC93	32463	CD14+ Monocyte	0.671833	4.20492	17.6348	0.000114219	0.0266051
chr12_7977220_7978156	chr12	7977220	7978156	937	SLC2A3	41033	CD14+ Monocyte	-1.03284	2.57501	17.6132	0.000114522	0.0266051
chr2_27262397_27263373	chr2	27262397	27263373	977	SLC30A3	326	CD14+ Monocyte	0.739096	3.29715	17.632	0.000114733	0.0266051
chr14_75220270_75220540	chr14	75220270	75220540	271	TMED10	43658	CD14+ Monocyte	-1.18471	1.22052	17.3141	0.000115002	0.0266051
chr1_246730721_246731572	chr1	246730721	246731572	852	SCCPDH	6313	CD14+ Monocyte	0.912451	2.68019	17.5981	0.00011544	0.0266348
chr3_81485250_81486019	chr3	81485250	81486019	770	GBE1	275626	CD14+ Monocyte	-1.01934	2.12237	17.5583	0.000116791	0.0268514
chr19_54417790_54418839	chr19	54417790	54418839	1050	TTYH1	2327	CD14+ Monocyte	1.19223	2.02736	17.4696	0.000117003	0.0268514
chr2_152410132_152411927	chr2	152410132	152411927	1796	FMNL2	74959	CD14+ Monocyte	-0.657745	2.54856	17.5604	0.000117615	0.0269202
chr6_2658690_2659310	chr6	2658690	2659310	621	MYLK4	91612	CD14+ Monocyte	-0.896269	1.88842	17.5141	0.000118988	0.0270381
chr19_44356403_44357015	chr19	44356403	44357015	613	ZNF112	277	CD14+ Monocyte	-1.30592	0.657972	17.0134	0.00011903	0.0270381
chr14_24250467_24251178	chr14	24250467	24251178	712	TINF2	7793	CD14+ Monocyte	1.86523	1.05944	17.0281	0.000119353	0.0270381
chr13_19591707_19592392	chr13	19591707	19592392	686	TPTE2	30133	CD14+ Monocyte	-1.36117	0.81599	17.1825	0.000119916	0.0270381
chr21_36385234_36385928	chr21	36385234	36385928	695	CHAF1B	157	CD14+ Monocyte	0.569769	4.15228	17.5079	0.000119928	0.0270381
chr7_28669053_28670014	chr7	28669053	28670014	962	CREB5	16118	CD14+ Monocyte	0.834622	3.39237	17.514	0.000120059	0.0270381
chr9_122218240_122220889	chr9	122218240	122220889	2650	MRRF	43713	CD14+ Monocyte	1.38518	1.87169	17.2169	0.000120446	0.0270381
chr15_81293707_81294766	chr15	81293707	81294766	1060	IL16	2203	CD14+ Monocyte	-0.663483	4.04648	17.493	0.000120644	0.0270381
chr21_46143605_46144386	chr21	46143605	46144386	782	FTCD-AS1	6988	CD14+ Monocyte	0.809675	3.31629	17.4806	0.00012156	0.0271493
chr2_47002050_47003320	chr2	47002050	47003320	1271	MCFD2	60195	CD14+ Monocyte	-0.794411	4.11685	17.4679	0.000121771	0.0271493
chr2_241571158_241574371	chr2	241571158	241574371	3214	BOK-AS1	12015	CD14+ Monocyte	1.48059	1.68834	17.1593	0.000122374	0.0272133
chr12_3299797_3300953	chr12	3299797	3300953	1157	PRMT8	80395	CD14+ Monocyte	0.654067	3.72457	17.4514	0.000122727	0.0272214
chr5_157248702_157249643	chr5	157248702	157249643	942	CYFIP2	16479	CD14+ Monocyte	-0.796228	3.05526	17.4486	0.00012307	0.0272273
chr8_143420499_143421560	chr8	143420499	143421560	1062	MAFA-AS1	2821	CD14+ Monocyte	1.59176	0.895158	17.0282	0.000123527	0.0272379
chr2_234992951_234993925	chr2	234992951	234993925	975	SH3BP4	11578	CD14+ Monocyte	-0.780018	2.84722	17.4373	0.000123751	0.0272379
chr2_69164969_69165683	chr2	69164969	69165683	715	ANTXR1	151791	CD14+ Monocyte	-0.709312	1.88133	17.3495	0.000124198	0.0272623
chr17_6775596_6776763	chr17	6775596	6776763	1168	FBXO39	549	CD14+ Monocyte	2.32908	1.49994	17.0299	0.000124496	0.0272623
chr10_99536735_99537727	chr10	99536735	99537727	993	NKX2-3	3794	CD14+ Monocyte	1.3544	2.18279	17.1759	0.000125216	0.0272812
chr2_207498635_207499558	chr2	207498635	207499558	924	CREB1	30403	CD14+ Monocyte	-0.593138	3.83118	17.3622	0.000126951	0.0274897
chr20_3710872_3711796	chr20	3710872	3711796	925	SIGLEC1	804	CD14+ Monocyte	0.620532	3.95977	17.3637	0.000126976	0.0274897
chr15_33150935_33151488	chr15	33150935	33151488	554	FMN1	43226	CD14+ Monocyte	-0.524572	4.11466	17.3574	0.000127131	0.0274897
chr2_190956787_190957713	chr2	190956787	190957713	927	STAT1	56458	CD14+ Monocyte	1.96523	0.922265	16.8346	0.000127856	0.0275578
chr17_81373309_81374056	chr17	81373309	81374056	748	BAHCC1	21400	CD14+ Monocyte	-0.854808	1.95394	17.2627	0.000128312	0.0275578
chr17_77355134_77358237	chr17	77355134	77358237	3104	SEPTIN9	15099	CD14+ Monocyte	1.00521	2.18267	17.2055	0.00012851	0.0275578
chr3_188097492_188098301	chr3	188097492	188098301	810	LPP	54719	CD14+ Monocyte	-1.16323	1.57037	17.2496	0.000128727	0.0275578
chr15_69697662_69698565	chr15	69697662	69698565	904	DRAIC	135943	CD14+ Monocyte	-0.962459	1.78564	17.2189	0.000130257	0.0278163
chr19_18479818_18480491	chr19	18479818	18480491	674	ELL	41579	CD14+ Monocyte	-0.592286	3.4108	17.2805	0.000131369	0.0279235
chr9_120402762_120403934	chr9	120402762	120403934	1173	CDK5RAP2	176233	CD14+ Monocyte	0.88214	3.18986	17.2766	0.000131408	0.0279235
chr2_47086043_47086470	chr2	47086043	47086470	428	STPG4	68838	CD14+ Monocyte	-1.64292	0.916272	16.7558	0.000131749	0.027927
chr7_140083648_140084614	chr7	140083648	140084614	967	PARP12	20697	CD14+ Monocyte	1.53557	1.60737	17.0297	0.000133239	0.0281688
chr2_84945988_84946988	chr2	84945988	84946988	1001	KCMF1	24172	CD14+ Monocyte	-0.57862	3.9653	17.2302	0.000133545	0.0281688
chr7_105707941_105708444	chr7	105707941	105708444	504	ATXN7L1	28779	CD14+ Monocyte	-1.18464	0.78898	16.8407	0.000134097	0.0282161
chr2_144490108_144490308	chr2	144490108	144490308	201	ZEB2-AS1	29305	CD14+ Monocyte	1.42775	0.764307	16.5359	0.000136387	0.028628
chr17_55763839_55764480	chr17	55763839	55764480	642	PCTP	12735	CD14+ Monocyte	-0.854455	1.76122	17.0928	0.000137429	0.0287764
chr12_45435839_45436532	chr12	45435839	45436532	694	ANO6	143150	CD14+ Monocyte	-1.03794	2.99953	17.1518	0.000137847	0.0287939
chr1_12051752_12052596	chr1	12051752	12052596	845	TNFRSF8	10706	CD14+ Monocyte	1.08133	2.15535	17.0789	0.000139134	0.0289924
chr7_5856358_5856869	chr7	5856358	5856869	512	OCM	23928	CD14+ Monocyte	1.54597	0.612996	16.5735	0.000140531	0.0292128
chr6_124573079_124573452	chr6	124573079	124573452	374	NKAIN2	290075	CD14+ Monocyte	-2.00048	0.340385	16.4224	0.000141336	0.0293094
chr2_22276475_22277196	chr2	22276475	22277196	722	KLHL29	1107982	CD14+ Monocyte	-0.756143	2.96301	17.0782	0.000142124	0.0293442
chr2_21255722_21256582	chr2	21255722	21256582	861	LDAH	432592	CD14+ Monocyte	-0.5823	4.68143	17.066	0.000142186	0.0293442
chr6_30788747_30789175	chr6	30788747	30789175	429	HCG20	21923	CD14+ Monocyte	-1.0795	1.78749	16.8885	0.000142734	0.0293869
chr20_33369069_33370033	chr20	33369069	33370033	965	CDK5RAP1	31486	CD14+ Monocyte	0.994446	2.35061	17	0.000143552	0.0294409
chr17_80404733_80406136	chr17	80404733	80406136	1404	ENDOV	9030	CD14+ Monocyte	1.79104	1.16088	16.6225	0.000143681	0.0294409
chr5_14871247_14872958	chr5	14871247	14872958	1712	ANKH	531	CD14+ Monocyte	-0.663166	4.29804	17.0153	0.000145081	0.0295815
chr18_79403237_79403835	chr18	79403237	79403835	599	NFATC1	2939	CD14+ Monocyte	-0.628537	3.40924	17.0161	0.000145419	0.0295815
chr19_55397913_55399145	chr19	55397913	55399145	1233	UBE2S	8643	CD14+ Monocyte	0.57901	4.18075	17.0042	0.000145893	0.0295815
chr10_6958183_6958721	chr10	6958183	6958721	539	LINC00707	178586	CD14+ Monocyte	-1.1511	1.13683	16.8441	0.000146085	0.0295815
chr1_110951129_110951685	chr1	110951129	110951685	557	LRIF1	12237	CD14+ Monocyte	1.52766	0.649418	16.5165	0.00014664	0.0296066
chr12_128914272_128915432	chr12	128914272	128915432	1161	GLT1D1	60795	CD14+ Monocyte	-0.923323	2.28395	16.9573	0.000147313	0.0296209
chr20_20267485_20268638	chr20	20267485	20268638	1154	INSM1	99465	CD14+ Monocyte	-0.852393	2.71849	16.9527	0.000149374	0.0299654
chr3_12253362_12254689	chr3	12253362	12254689	1328	PPARG	32678	CD14+ Monocyte	0.840384	2.44186	16.8985	0.000149969	0.0300147
chr12_89880496_89881289	chr12	89880496	89881289	794	LINC02399	66403	CD14+ Monocyte	-0.919685	1.86803	16.913	0.000150538	0.0300587
chr2_10971774_10972397	chr2	10971774	10972397	624	LINC01954	93508	CD14+ Monocyte	-1.46979	0.693165	16.5503	0.000150901	0.0300614
chr8_144455815_144457428	chr8	144455815	144457428	1614	CYHR1	5443	CD14+ Monocyte	0.987156	3.58221	16.9006	0.00015213	0.0302363
chr15_87724172_87724948	chr15	87724172	87724948	777	NTRK3	481026	CD14+ Monocyte	-1.1071	1.92556	16.8358	0.000152492	0.0302384
chr1_1038473_1039203	chr1	1038473	1039203	731	AGRN	4481	CD14+ Monocyte	0.972709	3.17218	16.8826	0.000153313	0.0302617
chr5_112737157_112738516	chr5	112737157	112738516	1360	APC	632	CD14+ Monocyte	0.660344	3.88818	16.8773	0.000153313	0.0302617
chr6_111411947_111412664	chr6	111411947	111412664	718	REV3L	70554	CD14+ Monocyte	-0.656542	3.16917	16.8567	0.000154818	0.0304889
chr9_35579203_35579633	chr9	35579203	35579633	431	FAM166B	15325	CD14+ Monocyte	1.51551	0.772028	16.3496	0.000155702	0.030537
chr19_14675969_14676310	chr19	14675969	14676310	342	ADGRE3	1051	CD14+ Monocyte	-0.907521	1.89309	16.7797	0.000155772	0.030537
chr9_120474462_120475353	chr9	120474462	120475353	892	CDK5RAP2	104814	CD14+ Monocyte	1.16446	2.36437	16.7554	0.000156466	0.0305948
chr7_91848034_91848737	chr7	91848034	91848737	704	MTERF1	31965	CD14+ Monocyte	-0.920554	1.58729	16.7133	0.000156778	0.0305948
chr1_221809378_221810527	chr1	221809378	221810527	1150	LINC01655	30139	CD14+ Monocyte	-0.692227	2.11189	16.8093	0.000157796	0.0307238
chr4_138977267_138978157	chr4	138977267	138978157	891	NOCT	37623	CD14+ Monocyte	-0.570564	3.20233	16.7984	0.00015834	0.0307601
chr17_46851526_46852750	chr17	46851526	46852750	1225	WNT9B	56	CD14+ Monocyte	1.28447	0.901306	16.3332	0.000160436	0.0310494
chr10_23331116_23332554	chr10	23331116	23332554	1439	OTUD1	106520	CD14+ Monocyte	1.31634	2.89558	16.7251	0.000160694	0.0310494
chr14_103155099_103155915	chr14	103155099	103155915	817	TNFAIP2	31639	CD14+ Monocyte	-1.17735	1.15642	16.5797	0.000160911	0.0310494
chr4_106707769_106709118	chr4	106707769	106709118	1350	DKK2	327195	CD14+ Monocyte	-0.50257	4.22083	16.7094	0.000163452	0.031469
chr7_17934744_17935311	chr7	17934744	17935311	568	SNX13	5183	CD14+ Monocyte	-0.812002	2.23368	16.6953	0.000164307	0.0315236
chr1_89566495_89567409	chr1	89566495	89567409	915	LRRC8B	41667	CD14+ Monocyte	-0.850074	2.73774	16.6991	0.000164834	0.0315236
chr14_65250963_65252745	chr14	65250963	65252745	1783	LINC02324	28616	CD14+ Monocyte	1.82325	2.25314	16.5395	0.000165731	0.0315663
chr2_142840268_142841236	chr2	142840268	142841236	969	KYNU	36427	CD14+ Monocyte	-0.634166	2.8284	16.6845	0.000165791	0.0315663
chr18_57921402_57922191	chr18	57921402	57922191	790	ATP8B1	118087	CD14+ Monocyte	1.67406	1.04179	16.2674	0.000166371	0.0315686
chr18_39799200_39800691	chr18	39799200	39800691	1492	LINC01902	41017	CD14+ Monocyte	1.28497	1.40337	16.4145	0.000166537	0.0315686
chr3_152257407_152257931	chr3	152257407	152257931	525	MBNL1	10997	CD14+ Monocyte	-0.710731	2.71145	16.6614	0.000167063	0.0315988
chr1_22831719_22832682	chr1	22831719	22832682	964	EPHB2	120881	CD14+ Monocyte	1.1202	3.59929	16.6539	0.000167434	0.0315995
chr18_62510294_62511354	chr18	62510294	62511354	1061	ZCCHC2	11670	CD14+ Monocyte	1.41424	2.18294	16.462	0.000168327	0.0316985
chr19_12801345_12802301	chr19	12801345	12802301	957	PRDX2	455	CD14+ Monocyte	0.911128	2.73976	16.6053	0.000169373	0.0317749
chr1_1069136_1070518	chr1	1069136	1070518	1383	RNF223	3788	CD14+ Monocyte	0.629839	3.97089	16.6219	0.000169471	0.0317749
chr17_18318015_18318372	chr17	18318015	18318372	358	SMCR8	2723	CD14+ Monocyte	0.83694	3.37528	16.6049	0.000169932	0.0317921
chr16_1651054_1652763	chr16	1651054	1652763	1710	JPT2	25515	CD14+ Monocyte	1.07577	2.74069	16.4833	0.000170768	0.0318196
chr2_7071183_7072479	chr2	7071183	7072479	1297	RNF144A	138100	CD14+ Monocyte	0.59268	4.25155	16.5977	0.000170851	0.0318196
chr13_29165763_29166457	chr13	29165763	29166457	695	MTUS2	262202	CD14+ Monocyte	-1.35532	1.44542	16.5044	0.0001713	0.0318196
chr1_212944199_212944864	chr1	212944199	212944864	666	VASH2	5676	CD14+ Monocyte	-0.990709	1.17756	16.379	0.000171788	0.0318196
chr20_38804912_38807393	chr20	38804912	38807393	2482	PPP1R16B	784	CD14+ Monocyte	0.811838	3.73542	16.5677	0.000173118	0.0318196
chr8_96384403_96385409	chr8	96384403	96385409	1007	SDC2	108403	CD14+ Monocyte	-0.943707	1.73099	16.5235	0.00017321	0.0318196
chr14_74133541_74134875	chr14	74133541	74134875	1335	LIN52	48586	CD14+ Monocyte	0.962952	1.71012	16.3909	0.000173255	0.0318196
chr10_62493726_62494232	chr10	62493726	62494232	507	ZNF365	119358	CD14+ Monocyte	0.774976	2.71419	16.5474	0.000173901	0.0318196
chr12_62888328_62889034	chr12	62888328	62889034	707	PPM1H	46116	CD14+ Monocyte	-1.2332	0.875328	16.1052	0.000173994	0.0318196
chr14_72164329_72164749	chr14	72164329	72164749	421	RGS6	230803	CD14+ Monocyte	-1.64266	0.447745	16.1128	0.000174045	0.0318196
chr5_78760318_78761024	chr5	78760318	78761024	707	LHFPL2	111546	CD14+ Monocyte	-0.622509	3.37076	16.5525	0.000174146	0.0318196
chr4_52843662_52844513	chr4	52843662	52844513	852	RASL11B	17803	CD14+ Monocyte	-0.877376	3.60158	16.5276	0.000175758	0.032046
chr11_43920531_43921274	chr11	43920531	43921274	744	ALKBH3-AS1	330	CD14+ Monocyte	1.28994	2.21763	16.4817	0.000176237	0.0320654
chr10_29446292_29446768	chr10	29446292	29446768	477	SVIL	188203	CD14+ Monocyte	1.30431	1.0042	16.0451	0.00017758	0.0322417
chr14_60161460_60162102	chr14	60161460	60162102	643	DHRS7	3296	CD14+ Monocyte	-0.740826	2.80603	16.499	0.000178033	0.0322558
chr11_67125693_67125984	chr11	67125693	67125984	292	KDM2A	6431	CD14+ Monocyte	1.7098	1.92838	16.2341	0.000178852	0.0323361
chr15_75274174_75275045	chr15	75274174	75275045	872	GOLGA6D	7795	CD14+ Monocyte	1.01029	2.03833	16.4363	0.000180765	0.0325271
chr3_33383597_33385964	chr3	33383597	33385964	2368	UBP1	54414	CD14+ Monocyte	1.02308	2.02604	16.3384	0.000181246	0.0325271
chr22_19523156_19524322	chr22	19523156	19524322	1167	CLDN5	88	CD14+ Monocyte	1.63928	0.697525	15.9636	0.00018142	0.0325271
chr11_1744348_1744960	chr11	1744348	1744960	613	IFITM10	5635	CD14+ Monocyte	1.36488	1.3405	16.0763	0.000182431	0.0325955
chrX_129734501_129734803	chrX	129734501	129734803	303	XPNPEP2	4175	CD14+ Monocyte	1.46848	1.44257	16.1764	0.000182929	0.0325955
chr5_37722695_37723645	chr5	37722695	37723645	951	GDNF-AS1	116238	CD14+ Monocyte	1.19649	2.70294	16.4139	0.000182938	0.0325955
chr19_3284629_3286243	chr19	3284629	3286243	1615	CELF5	59352	CD14+ Monocyte	0.900956	3.57391	16.4209	0.000183489	0.0326261
chr21_41425758_41427175	chr21	41425758	41427175	1418	MX1	272	CD14+ Monocyte	0.642237	4.56741	16.3958	0.000184859	0.03276
chr6_32580458_32580882	chr6	32580458	32580882	425	HLA-DRB1	8954	CD14+ Monocyte	-1.56697	0.578837	15.836	0.000185003	0.03276
chr4_123599121_123600636	chr4	123599121	123600636	1516	LINC01091	49354	CD14+ Monocyte	-0.525491	3.48824	16.3604	0.00018774	0.0331584
chr12_55650702_55651164	chr12	55650702	55651164	463	METTL7B	30571	CD14+ Monocyte	0.697563	4.45284	16.3534	0.000188025	0.0331584
chr20_45993321_45993887	chr20	45993321	45993887	567	MMP9	15020	CD14+ Monocyte	-0.809428	3.06229	16.3474	0.000188916	0.0331584
chr8_141026301_141027556	chr8	141026301	141027556	1256	PTK2	24222	CD14+ Monocyte	1.30346	1.60333	16.0478	0.000189169	0.0331584
chr22_38208555_38209098	chr22	38208555	38209098	544	MAFF	5536	CD14+ Monocyte	1.04038	2.12366	16.1769	0.000189201	0.0331584
chr1_155570124_155570741	chr1	155570124	155570741	618	ASH1L	7321	CD14+ Monocyte	1.53103	1.47629	16.0261	0.000189582	0.0331584
chr17_68705198_68707487	chr17	68705198	68707487	2290	LINC01482	77045	CD14+ Monocyte	1.4324	2.24828	16.2071	0.000190289	0.0331584
chr16_84532463_84532808	chr16	84532463	84532808	346	MEAK7	27804	CD14+ Monocyte	-1.10597	1.16541	16.0727	0.000191015	0.0331584
chr12_111662239_111662930	chr12	111662239	111662930	692	BRAP	23026	CD14+ Monocyte	1.26175	1.79639	16.022	0.000191171	0.0331584
chr1_204806911_204807649	chr1	204806911	204807649	739	NFASC	21002	CD14+ Monocyte	0.565572	3.82158	16.3093	0.000191569	0.0331584
chr14_73430500_73431339	chr14	73430500	73431339	840	NUMB	27241	CD14+ Monocyte	1.58044	0.739097	15.7861	0.000191706	0.0331584
chr11_64165640_64166704	chr11	64165640	64166704	1065	MACROD1	473	CD14+ Monocyte	0.594356	3.7112	16.3057	0.000192041	0.0331584
chr22_30282410_30282975	chr22	30282410	30282975	566	CASTOR1	6530	CD14+ Monocyte	-0.731686	2.93398	16.2943	0.000192617	0.0331584
chr10_124042966_124044065	chr10	124042966	124044065	1100	CHST15	48341	CD14+ Monocyte	-0.673111	3.46094	16.2816	0.00019377	0.0332851
chr1_245679494_245680481	chr1	245679494	245680481	988	SMYD3	308070	CD14+ Monocyte	-1.0233	2.04388	16.2526	0.0001953	0.0334779
chr5_171676021_171676959	chr5	171676021	171676959	939	FGF18	256375	CD14+ Monocyte	-0.605414	3.65308	16.2544	0.00019567	0.0334779
chr1_16931160_16932022	chr1	16931160	16932022	863	CROCC	9230	CD14+ Monocyte	1.2218	1.38612	15.978	0.000199016	0.0339428
chr22_40508938_40510399	chr22	40508938	40510399	1462	MRTFA-AS1	11400	CD14+ Monocyte	-0.728926	3.02937	16.2133	0.000199238	0.0339428
chr10_126904975_126905855	chr10	126904975	126905855	881	DOCK1	428	CD14+ Monocyte	1.90787	0.601624	15.7674	0.000200363	0.0339428
chr1_32349153_32349589	chr1	32349153	32349589	437	FAM229A	12654	CD14+ Monocyte	-0.64168	3.08369	16.1896	0.000200408	0.0339428
chr1_202295631_202296024	chr1	202295631	202296024	394	UBE2T	45912	CD14+ Monocyte	1.8092	0.789234	15.7913	0.00020188	0.0339428
chr22_37824535_37825689	chr22	37824535	37825689	1155	GALR3	1154	CD14+ Monocyte	0.957424	2.4101	16.1116	0.000202224	0.0339428
chrX_101595769_101596517	chrX	101595769	101596517	749	ARMCX6	21483	CD14+ Monocyte	-0.748245	2.19079	16.1527	0.000202491	0.0339428
chr7_50598300_50599088	chr7	50598300	50599088	789	GRB10	106213	CD14+ Monocyte	1.41913	1.66024	15.9718	0.000202544	0.0339428
chr3_113614160_113615436	chr3	113614160	113615436	1277	USF3	81206	CD14+ Monocyte	-0.899969	1.90801	16.1283	0.000202726	0.0339428
chr2_131146104_131146792	chr2	131146104	131146792	689	PLEKHB2	41258	CD14+ Monocyte	-1.3285	1.57659	16.038	0.000203924	0.0340771
chr9_27347622_27348220	chr9	27347622	27348220	599	EQTN	50472	CD14+ Monocyte	-1.04218	1.47462	16.0454	0.000204953	0.0341805
chr11_129284465_129285237	chr11	129284465	129285237	773	ARHGAP32	4947	CD14+ Monocyte	-0.866261	2.27009	16.1313	0.000205794	0.0341805
chr12_111359253_111360204	chr12	111359253	111360204	952	PHETA1	8891	CD14+ Monocyte	0.933518	2.19303	16.074	0.000206134	0.0341805
chr19_49613847_49614822	chr19	49613847	49614822	976	PRR12	22666	CD14+ Monocyte	2.03629	2.52906	15.9956	0.000206598	0.0341805
chr16_57764006_57765174	chr16	57764006	57765174	1169	KIFC3	9904	CD14+ Monocyte	1.02769	2.55453	16.0787	0.000206926	0.0341805
chr3_186095073_186096318	chr3	186095073	186096318	1246	ETV5	12771	CD14+ Monocyte	-0.569361	4.40155	16.0486	0.000212055	0.0349607
chr7_127593823_127595119	chr7	127593823	127595119	1297	FSCN3	88	CD14+ Monocyte	-0.63453	3.51425	16.0319	0.000213777	0.0350032
chr1_21182236_21182475	chr1	21182236	21182475	240	EIF4G3	5339	CD14+ Monocyte	1.82797	0.897927	15.6265	0.000213869	0.0350032
chr1_180428884_180429638	chr1	180428884	180429638	755	ACBD6	72939	CD14+ Monocyte	0.684525	3.4985	16.0317	0.00021394	0.0350032
chr10_78960303_78961098	chr10	78960303	78961098	796	ZMIZ1-AS1	106350	CD14+ Monocyte	-0.82958	2.04865	16.0161	0.000214575	0.0350404
chr3_146148508_146149201	chr3	146148508	146149201	694	PLOD2	11983	CD14+ Monocyte	1.9199	0.920622	15.504	0.000217017	0.0352747
chr19_19186078_19186982	chr19	19186078	19186982	905	BORCS8	5170	CD14+ Monocyte	1.00809	3.10811	15.9616	0.00021714	0.0352747
chr7_102611925_102612809	chr7	102611925	102612809	885	RASA4	3947	CD14+ Monocyte	-1.3965	1.20704	15.7185	0.000217239	0.0352747
chr6_53464849_53465452	chr6	53464849	53465452	604	GCLC	79649	CD14+ Monocyte	-0.855644	2.07266	15.9577	0.000218586	0.0354267
chr3_51955660_51956834	chr3	51955660	51956834	1175	GPR62	280	CD14+ Monocyte	0.533488	3.99688	15.961	0.000219731	0.0354825
chr6_30787973_30788431	chr6	30787973	30788431	459	HCG20	21149	CD14+ Monocyte	-1.28533	2.7936	15.9212	0.000219756	0.0354825
chr1_154574768_154575502	chr1	154574768	154575502	735	CHRNB2	6991	CD14+ Monocyte	1.66228	0.801149	15.495	0.000220459	0.0355294
chr6_135306132_135307318	chr6	135306132	135307318	1187	MYB	124825	CD14+ Monocyte	-0.784613	2.1831	15.8884	0.000223909	0.035923
chr18_13623063_13624224	chr18	13623063	13624224	1162	LDLRAD4	11300	CD14+ Monocyte	-0.677793	2.81936	15.9203	0.000224154	0.035923
chr19_11535761_11536463	chr19	11535761	11536463	703	CNN1	2387	CD14+ Monocyte	0.560294	3.90522	15.899	0.000225392	0.0360128
chr11_84714255_84714787	chr11	84714255	84714787	533	DLG2	6155	CD14+ Monocyte	1.46476	1.58432	15.6385	0.000228348	0.0362626
chr15_97984033_97984902	chr15	97984033	97984902	870	LINC02251	18135	CD14+ Monocyte	1.29569	3.06656	15.8692	0.000228497	0.0362626
chr11_30486992_30487887	chr11	30486992	30487887	896	MPPED2	96060	CD14+ Monocyte	-0.504914	4.22633	15.853	0.000229096	0.0362626
chr14_51856906_51857219	chr14	51856906	51857219	314	GNG2	3392	CD14+ Monocyte	-0.963339	0.920864	15.4881	0.000230051	0.0362626
chrX_63350375_63351674	chrX	63350375	63351674	1300	SPIN4	342	CD14+ Monocyte	-0.500456	4.00548	15.8403	0.000230312	0.0362626
chr3_52831425_52832716	chr3	52831425	52832716	1292	ITIH4	724	CD14+ Monocyte	1.24834	1.39804	15.5866	0.000230425	0.0362626
chr8_133505132_133505715	chr8	133505132	133505715	584	ST3GAL1	66172	CD14+ Monocyte	0.763412	2.72727	15.8367	0.000231439	0.0362626
chr13_74287063_74288854	chr13	74287063	74288854	1792	LINC00402	55620	CD14+ Monocyte	-0.8543	2.52738	15.8323	0.000232009	0.0362626
chr5_95808340_95809569	chr5	95808340	95809569	1230	GLRX	13157	CD14+ Monocyte	-0.854062	4.17026	15.818	0.00023235	0.0362626
chr19_17560079_17560665	chr19	17560079	17560665	587	COLGALT1	4431	CD14+ Monocyte	0.762837	4.24481	15.8169	0.000232644	0.0362626
chr5_68518964_68519604	chr5	68518964	68519604	641	PIK3R1	226388	CD14+ Monocyte	-1.23137	1.29403	15.7188	0.000232763	0.0362626
chr5_60540969_60541319	chr5	60540969	60541319	351	PDE4D	44683	CD14+ Monocyte	-1.08987	1.2873	15.6435	0.000232872	0.0362626
chr3_58217218_58217836	chr3	58217218	58217836	619	DNASE1L3	6215	CD14+ Monocyte	-0.526874	3.68774	15.8115	0.000233209	0.0362626
chr1_17536107_17536912	chr1	17536107	17536912	806	ARHGEF10L	2785	CD14+ Monocyte	-1.06091	1.78568	15.7651	0.000233798	0.0362626
chr14_68383290_68384085	chr14	68383290	68384085	796	ZFP36L1	408982	CD14+ Monocyte	-0.756188	2.53871	15.7964	0.000233857	0.0362626
chr19_47419602_47421374	chr19	47419602	47421374	1773	MEIS3	75	CD14+ Monocyte	1.06956	1.84216	15.665	0.000234518	0.0362996
chr10_12270449_12271880	chr10	12270449	12271880	1432	CDC123	74262	CD14+ Monocyte	-0.62498	3.62957	15.7917	0.000235122	0.0363161
chr20_291414_291691	chr20	291414	291691	278	C20orf96	636	CD14+ Monocyte	-1.06178	1.05513	15.4175	0.000235468	0.0363161
chr10_92419946_92421355	chr10	92419946	92421355	1410	IDE	76406	CD14+ Monocyte	0.962922	2.14592	15.7426	0.000236569	0.036404
chr6_14729505_14729839	chr6	14729505	14729839	335	LINC01108	444051	CD14+ Monocyte	-0.818434	2.03655	15.6866	0.000237368	0.036404
chr9_33082367_33083355	chr9	33082367	33083355	989	SMU1	5693	CD14+ Monocyte	-0.908441	1.94908	15.7164	0.00023773	0.036404
chr1_53185586_53185975	chr1	53185586	53185975	390	CPT2	10848	CD14+ Monocyte	1.06775	1.81481	15.6661	0.00024001	0.0366451
chr19_35405044_35405796	chr19	35405044	35405796	753	LINC01531	190	CD14+ Monocyte	2.03396	1.94529	15.5992	0.000240156	0.0366451
chr10_102188416_102190001	chr10	102188416	102190001	1586	NOLC1	36028	CD14+ Monocyte	1.32261	1.73649	15.5384	0.000240988	0.0366883
chr19_3154860_3155682	chr19	3154860	3155682	823	GNA15	18828	CD14+ Monocyte	1.02556	3.73474	15.7169	0.000242202	0.0367618
chr17_43606764_43607181	chr17	43606764	43607181	418	MEOX1	54382	CD14+ Monocyte	1.35972	1.9656	15.4312	0.000243041	0.0368241
chr8_29634845_29635618	chr8	29634845	29635618	774	LINC02099	112690	CD14+ Monocyte	-0.600258	3.00674	15.7026	0.000244163	0.0369291
chr8_130220394_130221371	chr8	130220394	130221371	978	ASAP1-IT2	135626	CD14+ Monocyte	0.9468	3.99127	15.6775	0.000245883	0.0371066
chr5_39946066_39948618	chr5	39946066	39948618	2553	DAB2	520833	CD14+ Monocyte	-0.626681	2.8119	15.6788	0.000246575	0.0371066
chr14_94390394_94391089	chr14	94390394	94391089	696	SERPINA1	241	CD14+ Monocyte	-0.625961	3.61378	15.6735	0.00024663	0.0371066
chr15_101624895_101625901	chr15	101624895	101625901	1007	TM2D3	26480	CD14+ Monocyte	1.03057	3.53421	15.6627	0.000247683	0.0372
chr15_42170957_42172059	chr15	42170957	42172059	1103	VPS39	36245	CD14+ Monocyte	1.10304	1.81127	15.4518	0.000249859	0.0374543
chr19_42185288_42185960	chr19	42185288	42185960	673	DEDD2	31717	CD14+ Monocyte	-0.580697	2.95954	15.6373	0.000250415	0.0374543
chr17_64693983_64694891	chr17	64693983	64694891	909	SMURF2	31676	CD14+ Monocyte	1.34171	2.39165	15.5865	0.000251117	0.0374543
chr16_89922999_89923584	chr16	89922999	89923584	586	TUBB3	243	CD14+ Monocyte	0.696307	3.60928	15.6121	0.000252813	0.0376007
chrX_84487544_84488304	chrX	84487544	84488304	761	HDX	14149	CD14+ Monocyte	-0.877317	1.62689	15.5128	0.000253032	0.0376007
chr3_27533201_27533497	chr3	27533201	27533497	297	SLC4A7	48817	CD14+ Monocyte	-1.02176	1.45745	15.4818	0.00025341	0.0376007
chr10_124577178_124579457	chr10	124577178	124579457	2280	LHPP	115356	CD14+ Monocyte	1.24961	1.48146	15.403	0.000255365	0.0376771
chr8_70465770_70466404	chr8	70465770	70466404	635	NCOA2	61553	CD14+ Monocyte	-1.31988	0.774129	15.2624	0.000256177	0.0376771
chr8_60998905_60999648	chr8	60998905	60999648	744	CHD7	257647	CD14+ Monocyte	-0.566315	4.19737	15.5729	0.00025618	0.0376771
chr13_113176133_113176761	chr13	113176133	113176761	629	PROZ	17480	CD14+ Monocyte	0.953037	4.80283	15.5708	0.000256359	0.0376771
chr7_93196173_93196981	chr7	93196173	93196981	809	VPS50	35358	CD14+ Monocyte	-0.851446	1.66299	15.4723	0.000258061	0.0377218
chr4_85928591_85930508	chr4	85928591	85930508	1918	ARHGAP24	493	CD14+ Monocyte	-0.836335	2.23735	15.5586	0.000258121	0.0377218
chr13_42970711_42971721	chr13	42970711	42971721	1011	EPSTI1	20520	CD14+ Monocyte	0.833056	2.62303	15.5449	0.00025817	0.0377218
chr1_1665624_1666227	chr1	1665624	1666227	604	CDK11B	6620	CD14+ Monocyte	1.28714	0.842392	15.1573	0.000258848	0.0377567
chr7_106952608_106953476	chr7	106952608	106953476	869	PIK3CG	87130	CD14+ Monocyte	-0.907798	3.09674	15.5485	0.000259409	0.0377746
chr12_78418965_78419317	chr12	78418965	78419317	353	SYT1	444664	CD14+ Monocyte	-1.21148	0.656725	15.154	0.000260466	0.0378643
chr18_45551295_45551844	chr18	45551295	45551844	550	SLC14A2	63631	CD14+ Monocyte	-0.922494	1.476	15.5017	0.000261273	0.0379176
chr15_51223548_51224238	chr15	51223548	51224238	691	CYP19A1	18791	CD14+ Monocyte	1.11825	2.84404	15.5024	0.000262964	0.0379686
chr17_63983315_63983739	chr17	63983315	63983739	425	SCN4A	10397	CD14+ Monocyte	-1.08205	1.25769	15.2788	0.000263143	0.0379686
chr11_96317420_96318122	chr11	96317420	96318122	703	MAML2	25073	CD14+ Monocyte	-1.16222	0.947331	15.1368	0.000263544	0.0379686
chrX_150879626_150880482	chrX	150879626	150880482	857	CD99L2	18186	CD14+ Monocyte	1.34908	2.04706	15.3364	0.00026383	0.0379686
chr19_3450841_3451573	chr19	3450841	3451573	733	SMIM24	28952	CD14+ Monocyte	1.27828	1.62386	15.1724	0.000264568	0.0380091
chr9_90808531_90809529	chr9	90808531	90809529	999	SYK	6713	CD14+ Monocyte	-0.635766	4.01687	15.4869	0.000265246	0.0380091
chr2_207505810_207506079	chr2	207505810	207506079	270	CREB1	23882	CD14+ Monocyte	-0.821426	2.34268	15.4867	0.000265437	0.0380091
chr15_97995688_97996628	chr15	97995688	97996628	941	LINC02251	6409	CD14+ Monocyte	0.858402	1.70032	15.3445	0.000267744	0.0382758
chr12_68676146_68676798	chr12	68676146	68676798	653	NUP107	10179	CD14+ Monocyte	1.46832	1.02052	14.9877	0.000269353	0.0384419
chr13_30737482_30738353	chr13	30737482	30738353	872	ALOX5AP	1940	CD14+ Monocyte	-0.590733	4.64817	15.4324	0.000270927	0.0386027
chr5_73364033_73364573	chr5	73364033	73364573	541	FOXD1	84204	CD14+ Monocyte	-2.00277	0.323648	14.7669	0.000272113	0.0386325
chr3_46606805_46607205	chr3	46606805	46607205	401	LRRC2	40503	CD14+ Monocyte	2.37263	0.758634	14.9952	0.000272415	0.0386325
chr11_396273_397687	chr11	396273	397687	1415	SIGIRR	17312	CD14+ Monocyte	0.742815	3.7176	15.4242	0.000272484	0.0386325
chr14_94110589_94111203	chr14	94110589	94111203	615	IFI27	146	CD14+ Monocyte	3.54934	1.33697	15.1278	0.000274129	0.0387495
chr17_80866300_80866676	chr17	80866300	80866676	377	CHMP6	125164	CD14+ Monocyte	0.800216	2.04927	15.3725	0.000274673	0.0387514
chr2_110714597_110715408	chr2	110714597	110715408	812	ACOXL	17164	CD14+ Monocyte	-0.852367	1.46741	15.2766	0.000275942	0.0387711
chr12_121589962_121590793	chr12	121589962	121590793	832	KDM2B	8939	CD14+ Monocyte	0.597705	3.69156	15.3876	0.000276568	0.0387711
chr1_9718872_9719635	chr1	9718872	9719635	764	PIK3CD	27406	CD14+ Monocyte	0.900489	3.21494	15.3815	0.000276899	0.0387711
chr11_107824671_107825574	chr11	107824671	107825574	904	SLC35F2	33213	CD14+ Monocyte	-1.01479	1.50892	15.3103	0.000277065	0.0387711
chr17_60437337_60438235	chr17	60437337	60438235	899	C17orf64	14849	CD14+ Monocyte	1.23812	1.6101	15.1478	0.00027772	0.0387997
chr11_122253551_122254500	chr11	122253551	122254500	950	MIR100HG	50442	CD14+ Monocyte	-0.677839	3.46539	15.3646	0.000278937	0.0389064
chr1_245690119_245690784	chr1	245690119	245690784	666	SMYD3	297767	CD14+ Monocyte	-1.30314	1.31756	15.2676	0.000279957	0.0389856
chr12_57330488_57331480	chr12	57330488	57331480	993	R3HDM2	10294	CD14+ Monocyte	0.815442	3.5945	15.341	0.000281791	0.0391776
chr12_96107905_96108903	chr12	96107905	96108903	999	LTA4H	64385	CD14+ Monocyte	-0.687148	2.41343	15.3299	0.000282461	0.0391783
chr8_22614873_22616683	chr8	22614873	22616683	1811	CCAR2	9832	CD14+ Monocyte	1.07563	1.59478	15.1279	0.000282706	0.0391783
chr21_14879431_14880504	chr21	14879431	14880504	1074	LINC02246	38164	CD14+ Monocyte	-0.789744	2.6181	15.3218	0.000283743	0.0392588
chr17_15249290_15251177	chr17	15249290	15251177	1888	PMP22	9643	CD14+ Monocyte	-1.02783	2.22749	15.3161	0.000284951	0.0393626
chr6_31851279_31853058	chr6	31851279	31853058	1780	NEU1	9763	CD14+ Monocyte	1.14079	2.62263	15.2575	0.000286242	0.0394488
chr19_2206963_2208832	chr19	2206963	2208832	1870	PLEKHJ1	27497	CD14+ Monocyte	1.26603	1.41428	15.0466	0.000286712	0.0394488
chr1_83760760_83761547	chr1	83760760	83761547	788	LINC01725	99449	CD14+ Monocyte	-1.32546	1.2572	15.1676	0.000287304	0.0394488
chr20_20303414_20304302	chr20	20303414	20304302	889	INSM1	63801	CD14+ Monocyte	-1.19709	2.57382	15.2855	0.000288158	0.0394488
chr7_116786554_116787444	chr7	116786554	116787444	891	CAPZA2	75142	CD14+ Monocyte	-0.707913	3.27326	15.2804	0.000288606	0.0394488
chrX_44545462_44545969	chrX	44545462	44545969	508	FUNDC1	2603	CD14+ Monocyte	-0.789888	1.54935	15.1431	0.000289877	0.0394488
chr16_28088614_28091003	chr16	28088614	28091003	2390	GSG1L	24900	CD14+ Monocyte	1.28435	1.37418	14.9981	0.000290002	0.0394488
chr2_26847773_26849934	chr2	26847773	26849934	2162	DPYSL5	358	CD14+ Monocyte	1.07719	1.90336	15.1658	0.000290384	0.0394488
chr16_56539838_56540875	chr16	56539838	56540875	1038	BBS2	19814	CD14+ Monocyte	1.89364	1.36405	14.9309	0.000290922	0.0394488
chr2_171244428_171245705	chr2	171244428	171245705	1278	TLK1	13135	CD14+ Monocyte	1.30207	2.02225	15.1373	0.000291614	0.0394488
chr17_78979253_78980795	chr17	78979253	78980795	1543	LGALS3BP	670	CD14+ Monocyte	0.981815	2.28282	15.1653	0.000291734	0.0394488
chr15_41477119_41477876	chr15	41477119	41477876	758	ITPKA	15997	CD14+ Monocyte	1.45411	1.70838	15.0538	0.000291779	0.0394488
chr16_90033610_90034403	chr16	90033610	90034403	794	GAS8-AS1	3709	CD14+ Monocyte	0.751891	2.66114	15.2007	0.000292454	0.0394492
chr16_10868397_10869237	chr16	10868397	10869237	841	CIITA	7960	CD14+ Monocyte	-0.50127	3.56075	15.223	0.000295276	0.0397215
chr4_168802874_168803651	chr4	168802874	168803651	778	PALLD	28443	CD14+ Monocyte	-0.669379	2.89314	15.226	0.000295396	0.0397215
chr15_87761608_87762621	chr15	87761608	87762621	1014	NTRK3	443353	CD14+ Monocyte	-0.708143	3.87978	15.2038	0.000297193	0.0399009
chr5_60541813_60542356	chr5	60541813	60542356	544	PDE4D	45527	CD14+ Monocyte	-0.730566	2.63067	15.2034	0.000297946	0.0399396
chr3_42071983_42073231	chr3	42071983	42073231	1249	TRAK1	13968	CD14+ Monocyte	-0.798829	3.26336	15.1905	0.000299544	0.040061
chr5_54013353_54014129	chr5	54013353	54014129	777	ARL15	296444	CD14+ Monocyte	0.900905	3.06112	15.1626	0.000300046	0.040061
chr16_60107129_60108213	chr16	60107129	60108213	1085	LINC02141	251777	CD14+ Monocyte	-1.2613	1.92333	15.1643	0.000300248	0.040061
chr14_99946017_99948074	chr14	99946017	99948074	2058	EVL	23347	CD14+ Monocyte	0.829669	2.07669	15.1012	0.000302415	0.0402377
chr5_123088282_123090461	chr5	123088282	123090461	2180	PPIC	51557	CD14+ Monocyte	1.53939	1.42009	14.8818	0.000302508	0.0402377
chr17_80856363_80857194	chr17	80856363	80857194	832	CHMP6	134646	CD14+ Monocyte	0.664459	4.10199	15.1338	0.000305804	0.0406134
chr19_35353673_35353992	chr19	35353673	35353992	320	FFAR1	2132	CD14+ Monocyte	1.28892	2.28803	15.0777	0.000308212	0.0408702
chr9_137284692_137285497	chr9	137284692	137285497	806	TOR4A	6967	CD14+ Monocyte	1.36631	1.77187	14.8685	0.000311847	0.0412551
chr1_231990138_231990927	chr1	231990138	231990927	790	DISC1-IT1	64305	CD14+ Monocyte	-1.39882	0.88948	14.6904	0.000312481	0.0412551
chr1_22031330_22032206	chr1	22031330	22032206	877	LINC01635	5282	CD14+ Monocyte	-0.633173	2.49416	15.0844	0.000312553	0.0412551
chr19_6379725_6381540	chr19	6379725	6381540	1816	PSPN	3809	CD14+ Monocyte	0.994542	1.47138	14.8198	0.000314451	0.041442
chr12_118398703_118399476	chr12	118398703	118399476	774	SUDS3	22149	CD14+ Monocyte	1.24741	1.02276	14.7717	0.000315802	0.0415564
chr19_49363177_49364033	chr19	49363177	49364033	857	DKKL1	157	CD14+ Monocyte	0.751453	5.35555	15.0433	0.000316744	0.0416167
chr19_8592047_8593034	chr19	8592047	8593034	988	ADAMTS10	149	CD14+ Monocyte	0.682048	4.96179	15.0395	0.000317289	0.0416248
chr2_66433327_66435690	chr2	66433327	66435690	2364	MEIS1	566	CD14+ Monocyte	1.00021	3.69676	15.0376	0.000318093	0.0416667
chr3_183272777_183273211	chr3	183272777	183273211	435	B3GNT5	19525	CD14+ Monocyte	-1.01537	1.27734	14.7817	0.000320544	0.0418158
chr12_116888926_116889317	chr12	116888926	116889317	392	HRK	7485	CD14+ Monocyte	4.64181	1.16283	14.8116	0.000320688	0.0418158
chr1_3316551_3317053	chr1	3316551	3317053	503	PRDM16	247349	CD14+ Monocyte	1.52224	1.6783	14.7752	0.000321259	0.0418269
chr10_10418142_10418909	chr10	10418142	10418909	768	CELF2-DT	43440	CD14+ Monocyte	-1.46086	1.61825	14.9593	0.000322845	0.0418633
chr9_21831902_21832618	chr9	21831902	21832618	717	MTAP	29267	CD14+ Monocyte	0.736707	4.33974	14.9927	0.000323387	0.0418633
chr5_83510869_83511598	chr5	83510869	83511598	730	VCAN	39126	CD14+ Monocyte	1.33913	1.24199	14.7258	0.000323487	0.0418633
chr3_112782443_112782971	chr3	112782443	112782971	529	LINC02042	33124	CD14+ Monocyte	-1.05007	1.13034	14.8691	0.000323688	0.0418633
chr1_31610890_31611897	chr1	31610890	31611897	1008	HCRTR1	5791	CD14+ Monocyte	1.10935	1.45995	14.764	0.000324195	0.0418633
chr6_10722624_10723463	chr6	10722624	10723463	840	TMEM14C	290	CD14+ Monocyte	-0.631701	4.69479	14.9842	0.000324458	0.0418633
chr2_152062369_152063175	chr2	152062369	152063175	807	CACNB4	35588	CD14+ Monocyte	-0.844332	1.54996	14.8867	0.000325775	0.0419703
chr10_95813939_95814788	chr10	95813939	95814788	850	ENTPD1	57777	CD14+ Monocyte	-0.819642	1.64847	14.897	0.000327284	0.0421017
chr6_44024541_44025017	chr6	44024541	44025017	477	C6orf223	23957	CD14+ Monocyte	-1.122	0.750693	14.515	0.000328276	0.0421664
chr15_40313650_40314139	chr15	40313650	40314139	490	PLCB2	5715	CD14+ Monocyte	-0.793735	1.76523	14.8495	0.000330156	0.0423389
chr22_42374604_42375548	chr22	42374604	42375548	945	LINC01315	5396	CD14+ Monocyte	-0.679565	3.41281	14.9435	0.000330604	0.0423389
chr14_70692000_70692807	chr14	70692000	70692807	808	LINC01269	5890	CD14+ Monocyte	-0.616875	3.17836	14.9377	0.000331578	0.0424006
chr3_28939858_28941431	chr3	28939858	28941431	1574	RBMS3-AS3	339508	CD14+ Monocyte	-1.21379	1.91334	14.9089	0.000333791	0.0426202
chr11_102303263_102304096	chr11	102303263	102304096	834	BIRC3	13387	CD14+ Monocyte	-0.86882	2.49058	14.9073	0.000335489	0.0426281
chr7_149140449_149141594	chr7	149140449	149141594	1146	ZNF398	5858	CD14+ Monocyte	1.25564	1.61185	14.7451	0.000335502	0.0426281
chr2_102116341_102117161	chr2	102116341	102117161	821	IL1R1	11738	CD14+ Monocyte	-1.17285	1.59817	14.8359	0.000336051	0.0426281
chr3_135965304_135966495	chr3	135965304	135966495	1192	PPP2R3A	423	CD14+ Monocyte	0.552507	4.20859	14.8985	0.000336093	0.0426281
chr15_100878882_100880329	chr15	100878882	100880329	1448	ALDH1A3	499	CD14+ Monocyte	1.10311	1.52867	14.729	0.000336329	0.0426281
chr14_99021755_99022994	chr14	99021755	99022994	1240	BCL11B	249203	CD14+ Monocyte	-1.44652	0.992117	14.6851	0.000336827	0.0426284
chr19_49848186_49848678	chr19	49848186	49848678	493	PTOV1	2026	CD14+ Monocyte	0.635921	2.82669	14.8822	0.000338622	0.042715
chr7_148712786_148713513	chr7	148712786	148713513	728	CUL1	13077	CD14+ Monocyte	1.25613	1.12701	14.5256	0.000339454	0.042715
chr19_35433048_35433460	chr19	35433048	35433460	413	FFAR2	14796	CD14+ Monocyte	0.995555	2.34787	14.8341	0.000339591	0.042715
chr16_79519225_79520230	chr16	79519225	79520230	1006	MAF	80507	CD14+ Monocyte	-0.93598	2.26433	14.8707	0.000340449	0.042715
chr3_123693510_123694174	chr3	123693510	123694174	665	MYLK	72962	CD14+ Monocyte	-1.29199	1.11723	14.7244	0.00034091	0.042715
chr5_175765714_175766231	chr5	175765714	175766231	518	CPLX2	30301	CD14+ Monocyte	1.18305	1.24923	14.6718	0.000341012	0.042715
chr1_193537370_193538210	chr1	193537370	193538210	841	LINC01031	232626	CD14+ Monocyte	-0.650264	2.7551	14.8596	0.00034241	0.042715
chr1_120544353_120545045	chr1	120544353	120545045	693	NBPF26	260510	CD14+ Monocyte	1.63782	0.73392	14.4811	0.000342968	0.042715
chr15_63668314_63669654	chr15	63668314	63669654	1341	USP3-AS1	67487	CD14+ Monocyte	1.05933	1.90159	14.7242	0.000343367	0.042715
chr9_121492897_121493414	chr9	121492897	121493414	518	DAB2IP	73687	CD14+ Monocyte	-0.720547	2.24755	14.8365	0.000344166	0.042715
chr12_51056138_51056577	chr12	51056138	51056577	440	LETMD1	7812	CD14+ Monocyte	1.38017	1.12183	14.5567	0.000344356	0.042715
chr3_152236696_152237340	chr3	152236696	152237340	645	MBNL1	6291	CD14+ Monocyte	-0.678297	2.00416	14.8183	0.000344488	0.042715
chr15_80778943_80779757	chr15	80778943	80779757	815	CEMIP	388	CD14+ Monocyte	0.882981	2.10309	14.7618	0.000344583	0.042715
chr17_17663169_17664017	chr17	17663169	17664017	849	SMCR2	13671	CD14+ Monocyte	0.920359	3.40921	14.832	0.000345671	0.042715
chr9_76350969_76351363	chr9	76350969	76351363	395	RFK	43063	CD14+ Monocyte	-1.49858	1.20008	14.6142	0.000345837	0.042715
chr12_124764416_124764612	chr12	124764416	124764612	197	SCARB1	75059	CD14+ Monocyte	1.14	1.9725	14.7022	0.000346283	0.042715
chr10_118002640_118003504	chr10	118002640	118003504	865	CASC2	43316	CD14+ Monocyte	1.60303	1.02594	14.4669	0.000346555	0.042715
chr11_47244998_47245237	chr11	47244998	47245237	240	NR1H3	3062	CD14+ Monocyte	1.6926	1.85685	14.6166	0.000346764	0.042715
chr14_24181102_24183724	chr14	24181102	24183724	2623	IPO4	5092	CD14+ Monocyte	0.942128	3.53802	14.8242	0.000346941	0.042715
chr19_55216398_55217415	chr19	55216398	55217415	1018	PTPRH	6897	CD14+ Monocyte	0.512354	4.37361	14.8109	0.000348243	0.042814
chr2_160362403_160363581	chr2	160362403	160363581	1179	LINC02478	90508	CD14+ Monocyte	1.47773	1.9469	14.6067	0.000349198	0.0428701
chr6_170144494_170145145	chr6	170144494	170145145	652	LINC01624	127328	CD14+ Monocyte	1.02991	1.2794	14.563	0.000349979	0.0429048
chr15_80977431_80978086	chr15	80977431	80978086	656	MESD	11733	CD14+ Monocyte	-0.976492	2.00899	14.7856	0.000351422	0.0430205
chr2_26401445_26402487	chr2	26401445	26402487	1043	DRC1	474	CD14+ Monocyte	0.907685	2.32142	14.7229	0.00035367	0.0431729
chr14_34817309_34818322	chr14	34817309	34818322	1014	BAZ1A	57038	CD14+ Monocyte	1.15117	1.91021	14.5634	0.000354968	0.0432699
chr10_70279903_70280509	chr10	70279903	70280509	607	NPFFR1	3495	CD14+ Monocyte	-1.03299	1.63769	14.6097	0.000355495	0.0432728
chr11_313495_314928	chr11	313495	314928	1434	IFITM1	544	CD14+ Monocyte	0.875777	3.57802	14.7325	0.000359932	0.0434428
chr13_41500152_41501811	chr13	41500152	41501811	1660	RGCC	42603	CD14+ Monocyte	-1.06003	1.41477	14.6497	0.000360136	0.0434428
chr1_220961885_220962715	chr1	220961885	220962715	831	HLX-AS1	81745	CD14+ Monocyte	0.94409	3.14128	14.7257	0.000360822	0.0434428
chr17_1178884_1181464	chr17	1178884	1181464	2581	ABR	1097	CD14+ Monocyte	0.545702	3.64553	14.7259	0.00036097	0.0434428
chr8_70942320_70942792	chr8	70942320	70942792	473	XKR9	272982	CD14+ Monocyte	-1.40264	0.70042	14.4399	0.000361083	0.0434428
chr9_108078703_108079294	chr9	108078703	108079294	592	KLF4	588934	CD14+ Monocyte	-1.2658	1.00032	14.5651	0.000361434	0.0434428
chr11_43788188_43789061	chr11	43788188	43789061	874	ALKBH3	91769	CD14+ Monocyte	-0.660331	3.1169	14.7146	0.000362775	0.0434784
chr1_183281216_183281893	chr1	183281216	183281893	678	NMNAT2	22981	CD14+ Monocyte	0.663531	3.2057	14.7103	0.000363566	0.0434784
chr12_91947445_91948116	chr12	91947445	91948116	672	LINC01619	193597	CD14+ Monocyte	-0.962701	2.56032	14.7046	0.000363573	0.0434784
chr7_65946998_65947405	chr7	65946998	65947405	408	GUSB	34808	CD14+ Monocyte	1.50362	0.965673	14.4088	0.000363751	0.0434784
chr19_49973986_49974453	chr19	49973986	49974453	468	SIGLEC11	12814	CD14+ Monocyte	-0.769492	1.7973	14.5917	0.000366071	0.0435765
chr3_155770967_155771490	chr3	155770967	155771490	524	PLCH1	25896	CD14+ Monocyte	1.71891	0.978141	14.3832	0.000366358	0.0435765
chr18_59885554_59886635	chr18	59885554	59886635	1082	PMAIP1	13360	CD14+ Monocyte	-0.56147	2.8187	14.6911	0.000366591	0.0435765
chr19_45311488_45312233	chr19	45311488	45312233	746	CKM	10642	CD14+ Monocyte	0.823533	2.7176	14.6829	0.000366598	0.0435765
chr8_145001420_145003612	chr8	145001420	145003612	2193	ZNF252P-AS1	802	CD14+ Monocyte	-0.503039	4.74179	14.6727	0.000368092	0.0436776
chr9_35652254_35652771	chr9	35652254	35652771	518	SIT1	1323	CD14+ Monocyte	1.25946	2.12634	14.5463	0.00036886	0.0436776
chr17_78282355_78282663	chr17	78282355	78282663	309	LINC01993	3863	CD14+ Monocyte	0.894959	1.89519	14.5342	0.000368971	0.0436776
chr20_1810205_1811973	chr20	1810205	1811973	1769	SIRPA	82193	CD14+ Monocyte	-0.636041	3.15992	14.6586	0.000371542	0.0438969
chr5_157710780_157711339	chr5	157710780	157711339	560	THG1L	20080	CD14+ Monocyte	1.29592	1.13475	14.3902	0.000372073	0.0438969
chr1_89537962_89538974	chr1	89537962	89538974	1013	LRRC8B	13134	CD14+ Monocyte	-0.862861	1.81327	14.6215	0.000372763	0.0438969
chr20_3430342_3431284	chr20	3430342	3431284	943	C20orf194	22680	CD14+ Monocyte	-0.509216	3.90278	14.6422	0.000373083	0.0438969
chr13_110869392_110870748	chr13	110869392	110870748	1357	ANKRD10	44321	CD14+ Monocyte	1.07004	3.55018	14.6432	0.000373373	0.0438969
chr11_116972693_116973559	chr11	116972693	116973559	867	SIK3	124869	CD14+ Monocyte	-0.628135	2.67959	14.6241	0.000375724	0.0439728
chr15_89665509_89666360	chr15	89665509	89666360	852	KIF7	10042	CD14+ Monocyte	0.928538	2.31739	14.5868	0.000375771	0.0439728
chr5_72347737_72348322	chr5	72347737	72348322	586	PTCD2	27365	CD14+ Monocyte	1.40999	2.01561	14.5835	0.000375986	0.0439728
chr8_80872589_80874954	chr8	80872589	80874954	2366	ZNF704	173	CD14+ Monocyte	0.536449	3.37699	14.6286	0.000376063	0.0439728
chr14_61467179_61467784	chr14	61467179	61467784	606	LINC01303	102410	CD14+ Monocyte	-0.798028	1.78482	14.5307	0.000382805	0.044502
chr12_64806821_64807577	chr12	64806821	64807577	757	TBC1D30	17069	CD14+ Monocyte	1.24532	1.61052	14.4914	0.000383737	0.044502
chr1_39671628_39673067	chr1	39671628	39673067	1440	HPCAL4	18366	CD14+ Monocyte	0.820947	2.02007	14.5161	0.000383778	0.044502
chr9_6590327_6590922	chr9	6590327	6590922	596	GLDC	54807	CD14+ Monocyte	-1.07597	1.14804	14.4836	0.000384189	0.044502
chr7_767676_768706	chr7	767676	768706	1031	PRKAR1B	40000	CD14+ Monocyte	2.46621	1.17968	14.0245	0.000384208	0.044502
chr6_39338283_39338785	chr6	39338283	39338785	503	KCNK17	23864	CD14+ Monocyte	-1.26135	0.5747	14.2193	0.000386314	0.0446857
chr10_26690524_26691854	chr10	26690524	26691854	1331	PDSS1	5569	CD14+ Monocyte	-0.981418	2.1938	14.5279	0.000387073	0.0447134
chr15_51796755_51797286	chr15	51796755	51797286	532	TMOD3	32366	CD14+ Monocyte	1.88425	0.543757	14.1047	0.000389706	0.044859
chr19_12884962_12885972	chr19	12884962	12885972	1011	KLF1	1229	CD14+ Monocyte	0.589301	4.2363	14.5313	0.000390383	0.044859
chr8_29626783_29627934	chr8	29626783	29627934	1152	LINC02099	120374	CD14+ Monocyte	-0.838641	1.6679	14.4883	0.000390449	0.044859
chr22_50453122_50454891	chr22	50453122	50454891	1770	SBF1	20144	CD14+ Monocyte	0.969327	2.42127	14.4686	0.00039049	0.044859
chr6_125957992_125958315	chr6	125957992	125958315	324	HINT3	1223	CD14+ Monocyte	-0.666666	2.93502	14.528	0.000391627	0.044859
chr16_66909674_66911524	chr16	66909674	66911524	1851	CDH16	7361	CD14+ Monocyte	1.07947	1.73862	14.4163	0.000391936	0.044859
chr3_40314517_40314877	chr3	40314517	40314877	361	EIF1B	4811	CD14+ Monocyte	-0.855328	2.56221	14.5197	0.000392805	0.044859
chr11_132099622_132100510	chr11	132099622	132100510	889	NTM	188805	CD14+ Monocyte	-1.0288	1.69244	14.4876	0.000393392	0.044859
chr1_160629564_160630945	chr1	160629564	160630945	1382	SLAMF1	16099	CD14+ Monocyte	0.516514	3.83001	14.5088	0.000393987	0.044859
chr22_29117911_29118706	chr22	29117911	29118706	796	KREMEN1	44877	CD14+ Monocyte	0.844913	4.18149	14.5074	0.000394067	0.044859
chr18_10006344_10007153	chr18	10006344	10007153	810	VAPA	92329	CD14+ Monocyte	-0.71301	2.66257	14.4989	0.000396009	0.0449846
chr18_45686894_45687855	chr18	45686894	45687855	962	SLC14A1	36325	CD14+ Monocyte	-0.817392	3.7325	14.4881	0.00039724	0.0449846
chr14_23056076_23056768	chr14	23056076	23056768	693	CDH24	770	CD14+ Monocyte	0.585442	3.20773	14.4909	0.000397631	0.0449846
chr2_190984583_190986800	chr2	190984583	190986800	2218	STAT1	27371	CD14+ Monocyte	1.89254	1.43763	14.1778	0.000397742	0.0449846
chr19_55447166_55448380	chr19	55447166	55448380	1215	SHISA7	4303	CD14+ Monocyte	1.27571	1.7651	14.3077	0.000398542	0.0450112
chr12_121038612_121039611	chr12	121038612	121039611	1000	OASL	369	CD14+ Monocyte	0.523115	5.13347	14.4565	0.00040192	0.0453331
chr19_13937585_13939016	chr19	13937585	13939016	1432	PODNL1	540	CD14+ Monocyte	1.35171	0.997296	14.0407	0.000402446	0.0453331
chr9_35635615_35636827	chr9	35635615	35636827	1213	SIT1	14104	CD14+ Monocyte	-0.787595	2.24183	14.4211	0.000403637	0.0453886
chr15_89836425_89838010	chr15	89836425	89838010	1586	ANPEP	21573	CD14+ Monocyte	-0.533548	3.56199	14.4502	0.000404107	0.0453886
chr1_19511248_19511576	chr1	19511248	19511576	329	CAPZB	25709	CD14+ Monocyte	-0.868259	1.60888	14.3403	0.000404521	0.0453886
chr3_196246690_196247595	chr3	196246690	196247595	906	SLC51A	30157	CD14+ Monocyte	2.25607	1.29722	14.1876	0.000406899	0.045596
chr1_180151001_180151311	chr1	180151001	180151311	311	QSOX1	3521	CD14+ Monocyte	-0.599561	3.12772	14.4137	0.000409885	0.0458709
chr10_127979106_127979553	chr10	127979106	127979553	448	PTPRE	7726	CD14+ Monocyte	-0.951025	1.98003	14.3744	0.000410452	0.0458746
chr19_10896386_10897642	chr19	10896386	10897642	1257	CARM1	23958	CD14+ Monocyte	1.05506	1.57948	14.2504	0.000412256	0.0460165
chr3_4547743_4548273	chr3	4547743	4548273	531	ITPR1	54396	CD14+ Monocyte	-2.66039	0.751809	13.864	0.00041332	0.0460756
chr2_72149659_72150942	chr2	72149659	72150942	1284	CYP26B1	1797	CD14+ Monocyte	1.22708	1.44444	14.2047	0.000414736	0.0461641
chr15_100517126_100518033	chr15	100517126	100518033	908	CERS3	10917	CD14+ Monocyte	-0.855828	2.22779	14.3673	0.000415188	0.0461641
chr17_77273492_77275022	chr17	77273492	77275022	1531	SEPTIN9	6476	CD14+ Monocyte	1.14007	2.74642	14.306	0.000420965	0.0465905
chr7_85719978_85721087	chr7	85719978	85721087	1110	SEMA3D	469735	CD14+ Monocyte	1.18582	2.62138	14.349	0.000421786	0.0465905
chr19_8361882_8363199	chr19	8361882	8363199	1318	ANGPTL4	955	CD14+ Monocyte	1.0019	2.38044	14.2949	0.000422218	0.0465905
chr22_16869391_16870291	chr22	16869391	16870291	901	XKR3	47692	CD14+ Monocyte	-1.5887	0.710666	14.0639	0.00042285	0.0465905
chr19_19549049_19550072	chr19	19549049	19550072	1024	CILP2	10785	CD14+ Monocyte	1.15777	1.84672	14.2206	0.000422885	0.0465905
chr19_35869442_35870302	chr19	35869442	35870302	861	APLP1	869	CD14+ Monocyte	0.819283	3.16685	14.3222	0.00042387	0.0465905
chr10_10520586_10521248	chr10	10520586	10521248	663	CELF2	58037	CD14+ Monocyte	-1.12328	1.29123	14.2447	0.000424673	0.0465905
chr3_69994998_69995600	chr3	69994998	69995600	603	SAMMSON	4143	CD14+ Monocyte	-1.32633	1.51679	14.2795	0.000424757	0.0465905
chr2_71477159_71477791	chr2	71477159	71477791	633	DYSF	10461	CD14+ Monocyte	1.24953	3.39964	14.3256	0.000424977	0.0465905
chr8_11796186_11797094	chr8	11796186	11797094	909	FDFT1	614	CD14+ Monocyte	-0.961765	3.06469	14.3101	0.000427667	0.0467065
chr2_127897950_127899030	chr2	127897950	127899030	1081	AMMECR1L	11994	CD14+ Monocyte	-0.797715	2.44919	14.3067	0.000427931	0.0467065
chr14_105363466_105364627	chr14	105363466	105364627	1162	TEX22	33910	CD14+ Monocyte	1.19342	0.795961	13.9979	0.000428634	0.0467065
chr14_74239975_74242389	chr14	74239975	74242389	2415	ABCD4	60545	CD14+ Monocyte	0.993368	1.98571	14.1533	0.000428749	0.0467065
chr2_227388637_227388968	chr2	227388637	227388968	332	TM4SF20	9331	CD14+ Monocyte	1.82148	2.01093	14.144	0.000430461	0.0468338
chr2_177000194_177000636	chr2	177000194	177000636	443	HNRNPA3	212057	CD14+ Monocyte	-1.16083	0.75182	13.9813	0.000432777	0.0469989
chr6_11976440_11976742	chr6	11976440	11976742	303	HIVEP1	35569	CD14+ Monocyte	-1.07118	0.861857	13.9651	0.000433071	0.0469989
chr6_31911477_31911977	chr6	31911477	31911977	501	ZBTB12	9391	CD14+ Monocyte	1.37051	0.978053	13.9495	0.000433702	0.047003
chr7_77661254_77662331	chr7	77661254	77662331	1078	APTR	33934	CD14+ Monocyte	1.2599	1.16229	14.006	0.000434201	0.047003
chr5_138486660_138487305	chr5	138486660	138487305	646	EGR1	21182	CD14+ Monocyte	-1.11119	1.64799	14.1162	0.000435417	0.0470754
chrX_13131543_13132211	chrX	13131543	13132211	669	FAM9C	86923	CD14+ Monocyte	-0.896243	2.64305	14.2595	0.000437069	0.0471849
chr19_16153904_16154223	chr19	16153904	16154223	320	HSH2D	10220	CD14+ Monocyte	2.1232	0.983975	13.9199	0.000437527	0.0471849
chr5_17012114_17013582	chr5	17012114	17013582	1469	MYO10	75826	CD14+ Monocyte	1.06128	2.53596	14.2083	0.00043886	0.0472055
chr2_46469896_46470901	chr2	46469896	46470901	1006	RHOQ	71588	CD14+ Monocyte	-0.541592	4.58464	14.2391	0.000439359	0.0472055
chr14_74647258_74648540	chr14	74647258	74648540	1283	LTBP2	35021	CD14+ Monocyte	0.90751	1.55541	14.1183	0.000439363	0.0472055
chr4_14876996_14878072	chr4	14876996	14878072	1077	LINC00504	10097	CD14+ Monocyte	-0.593861	3.81133	14.2377	0.000439927	0.0472071
chr2_6877318_6878330	chr2	6877318	6878330	1013	RSAD2	458	CD14+ Monocyte	0.701371	3.47056	14.2363	0.000441065	0.0472703
chr1_231831577_231832875	chr1	231831577	231832875	1299	DISC1-IT1	92958	CD14+ Monocyte	1.54605	1.65256	14.1051	0.000443911	0.0473931
chr4_10023840_10024808	chr4	10023840	10024808	969	SLC2A9	2343	CD14+ Monocyte	-0.568842	3.71369	14.2105	0.000445178	0.0473931
chr18_22332177_22333026	chr18	22332177	22333026	850	CTAGE1	84889	CD14+ Monocyte	-1.371	1.68288	14.1812	0.000445435	0.0473931
chr10_132254661_132256183	chr10	132254661	132256183	1523	STK32C	5553	CD14+ Monocyte	-1.53051	1.89106	14.1928	0.000445998	0.0473931
chr5_180093534_180094159	chr5	180093534	180094159	626	RNF130	21775	CD14+ Monocyte	-0.680106	3.2922	14.2048	0.000446571	0.0473931
chr2_181991277_181992031	chr2	181991277	181992031	755	PPP1R1C	5425	CD14+ Monocyte	-1.14962	2.64155	14.2079	0.000446616	0.0473931
chr1_161351517_161352115	chr1	161351517	161352115	599	CFAP126	15761	CD14+ Monocyte	1.35017	1.81166	14.0626	0.000449197	0.0475112
chr16_11311751_11312185	chr16	11311751	11312185	435	RMI2	33252	CD14+ Monocyte	0.799442	3.54044	14.1891	0.000449386	0.0475112
chr10_26684581_26685694	chr10	26684581	26685694	1114	PDSS1	11729	CD14+ Monocyte	-0.877376	2.16673	14.1719	0.000450013	0.0475191
chrX_13742519_13743234	chrX	13742519	13743234	716	OFD1	7772	CD14+ Monocyte	0.978902	1.68236	13.9988	0.000451787	0.047648
chr14_50756215_50757214	chr14	50756215	50757214	1000	NIN	73907	CD14+ Monocyte	1.15597	1.96208	14.0284	0.000452497	0.0476645
chr1_39081319_39082002	chr1	39081319	39082002	684	MACF1	2164	CD14+ Monocyte	0.713318	2.60595	14.1669	0.000453323	0.0476931
chr3_156303132_156303744	chr3	156303132	156303744	613	KCNAB1	12096	CD14+ Monocyte	-0.935774	1.4981	14.0745	0.000455107	0.0477899
chr18_46252115_46252336	chr18	46252115	46252336	222	C18orf25	78082	CD14+ Monocyte	2.23746	1.02968	13.8486	0.000455353	0.0477899
chr11_12133780_12134798	chr11	12133780	12134798	1019	MICAL2	3591	CD14+ Monocyte	-0.655605	2.97092	14.1421	0.000458915	0.0481
chr12_120540348_120541103	chr12	120540348	120541103	756	RNF10	5993	CD14+ Monocyte	0.887094	2.23831	14.0901	0.000459667	0.0481
chr2_27496093_27497104	chr2	27496093	27497104	1012	FNDC4	893	CD14+ Monocyte	0.654463	2.76337	14.1092	0.000462427	0.0482967
chr17_66468322_66469398	chr17	66468322	66469398	1077	PRKCA-AS1	51468	CD14+ Monocyte	-0.517368	3.73317	14.1017	0.000465363	0.0485299
chr2_234989193_234989615	chr2	234989193	234989615	423	SH3BP4	7820	CD14+ Monocyte	-1.19024	0.843622	13.7691	0.000466152	0.0485299
chr7_148581291_148582291	chr7	148581291	148582291	1001	C7orf33	8474	CD14+ Monocyte	0.837788	3.07645	14.0932	0.000466351	0.0485299
chr3_38083975_38086278	chr3	38083975	38086278	2304	DLEC1	44768	CD14+ Monocyte	0.82295	3.912	14.0846	0.000469066	0.0487534
chr21_26965381_26966523	chr21	26965381	26966523	1143	ADAMTS5	565	CD14+ Monocyte	-1.01869	2.20737	14.0781	0.000470685	0.0488627
chr2_84894260_84895193	chr2	84894260	84895193	934	TMSB10	10462	CD14+ Monocyte	-0.745965	2.45152	14.0555	0.000473474	0.049093
chr10_28316539_28317101	chr10	28316539	28317101	563	MPP7	13475	CD14+ Monocyte	-1.08448	1.00636	13.8326	0.00047549	0.0492427
chr19_18023598_18024355	chr19	18023598	18024355	758	ARRDC2	15429	CD14+ Monocyte	-0.638418	4.22673	14.0418	0.000476882	0.0492926
chr12_6392322_6392922	chr12	6392322	6392922	601	LTBR	8161	CD14+ Monocyte	-1.01673	1.16317	13.875	0.000477619	0.0492926
chr22_29480246_29481900	chr22	29480246	29481900	1655	NEFH	29	CD14+ Monocyte	0.722908	3.27813	14.04	0.000477691	0.0492926
chr15_101070286_101071351	chr15	101070286	101071351	1066	LRRK1	150930	CD14+ Monocyte	0.880791	2.27995	14.02	0.000479111	0.04938
chr5_145983908_145984779	chr5	145983908	145984779	872	SH3RF2	47331	CD14+ Monocyte	-0.595714	3.73913	14.0124	0.000482561	0.0496675
chr13_114058297_114058854	chr13	114058297	114058854	558	RASA3	19101	CD14+ Monocyte	-0.935837	1.67388	13.8739	0.000483634	0.0496675
chr1_31181353_31182882	chr1	31181353	31182882	1530	NKAIN1	57005	CD14+ Monocyte	0.603173	3.4572	14.0063	0.000484611	0.0496675
chr20_41008081_41008910	chr20	41008081	41008910	830	TOP1	19911	CD14+ Monocyte	-0.525029	3.86188	14.0023	0.000484741	0.0496675
chr12_113860342_113861544	chr12	113860342	113861544	1203	LINC01234	86659	CD14+ Monocyte	1.06715	2.38259	13.9908	0.000484786	0.0496675
chr11_9240297_9241840	chr11	9240297	9241840	1544	DENND5A	23486	CD14+ Monocyte	1.33414	1.08016	13.6449	0.000486202	0.0496943
chr16_89200373_89202424	chr16	89200373	89202424	2052	SLC22A31	164	CD14+ Monocyte	0.693249	4.56828	13.9872	0.000487425	0.0497161
chr19_47019043_47020086	chr19	47019043	47020086	1044	NPAS1	250	CD14+ Monocyte	1.40627	0.913754	13.6502	0.000487571	0.0497161
chr19_16142285_16144283	chr19	16142285	16144283	1999	HSH2D	599	CD14+ Monocyte	0.534279	4.72981	13.9798	0.000488884	0.0497909
chr16_89101951_89102707	chr16	89101951	89102707	757	ACSF3	8100	CD14+ Monocyte	1.65148	1.79401	13.7937	0.000489635	0.0498085
chr10_10392594_10394148	chr10	10392594	10394148	1555	CELF2-DT	68201	CD14+ Monocyte	-1.39747	2.29641	13.9633	0.000493354	0.0501276
chr18_37299399_37299968	chr18	37299399	37299968	570	CELF4	185824	CD14+ Monocyte	1.40357	0.831395	13.5575	0.000496196	0.0503569
chr21_41399437_41399786	chr21	41399437	41399786	350	MX1	20771	CD14+ Monocyte	1.8323	1.47574	13.6768	0.000500732	0.0507573
chr19_51249791_51250292	chr19	51249791	51250292	502	SIGLECL1	787	CD14+ Monocyte	1.35724	1.81052	13.849	0.000503299	0.050833
chr14_74401269_74403279	chr14	74401269	74403279	2011	SYNDIG1L	22931	CD14+ Monocyte	0.893472	2.55263	13.9096	0.000503625	0.050833
chr1_9410056_9411306	chr1	9410056	9411306	1251	LINC02606	17610	CD14+ Monocyte	1.35099	1.41255	13.679	0.000504138	0.050833
chr12_50599192_50599849	chr12	50599192	50599849	658	DIP2B	94208	CD14+ Monocyte	0.897218	1.26593	13.7588	0.00050449	0.050833
chr13_114043162_114043822	chr13	114043162	114043822	661	RASA3	34133	CD14+ Monocyte	0.962254	3.57841	13.9048	0.000505422	0.050833
chr19_1122894_1123710	chr19	1122894	1123710	817	SBNO2	8511	CD14+ Monocyte	0.826226	4.17136	13.899	0.000505738	0.050833
chr15_31106609_31107246	chr15	31106609	31107246	638	TRPM1	4884	CD14+ Monocyte	1.56054	0.588614	13.5724	0.000506085	0.050833
chr10_84430037_84430345	chr10	84430037	84430345	309	CCSER2	4869	CD14+ Monocyte	1.63711	0.640955	13.5824	0.000506204	0.050833
chr17_21186191_21187003	chr17	21186191	21187003	813	DHRS7B	20022	CD14+ Monocyte	-0.767018	1.95962	13.8634	0.000509211	0.0509329
chr10_27783593_27784111	chr10	27783593	27784111	519	MKX	37774	CD14+ Monocyte	-1.00371	1.24744	13.8	0.000509505	0.0509329
chr16_70403715_70405771	chr16	70403715	70405771	2057	ST3GAL2	33329	CD14+ Monocyte	0.567525	4.58559	13.8789	0.000509511	0.0509329
chr18_62797334_62797824	chr18	62797334	62797824	491	PHLPP1	81794	CD14+ Monocyte	-0.939732	0.987584	13.698	0.000509565	0.0509329
chr3_39271849_39273262	chr3	39271849	39273262	1414	CX3CR1	6774	CD14+ Monocyte	-0.554896	3.53289	13.8732	0.000511494	0.0510663
chr14_69316973_69318664	chr14	69316973	69318664	1692	GALNT16	56816	CD14+ Monocyte	-0.571829	3.59523	13.8617	0.000513727	0.051179
chr21_43352576_43353312	chr21	43352576	43353312	737	LINC01679	9037	CD14+ Monocyte	1.98433	3.64205	13.8321	0.000513812	0.051179
chr10_133234904_133236329	chr10	133234904	133236329	1426	VENTX	1525	CD14+ Monocyte	-0.550079	4.71107	13.8528	0.000515001	0.0512382
chr9_97417910_97418703	chr9	97417910	97418703	794	TDRD7	5815	CD14+ Monocyte	-1.11441	1.58663	13.7742	0.000519745	0.0516504
chr9_136984326_136985583	chr9	136984326	136985583	1258	LCNL1	1334	CD14+ Monocyte	1.40007	1.26598	13.5537	0.000520789	0.0516945
chr5_119031844_119032261	chr5	119031844	119032261	418	DMXL1	38793	CD14+ Monocyte	1.55109	1.2687	13.5229	0.000521456	0.0516949
chr2_152468883_152469580	chr2	152468883	152469580	698	FMNL2	133710	CD14+ Monocyte	-0.578321	3.28993	13.8224	0.000522953	0.0516949
chr1_48246775_48247156	chr1	48246775	48247156	382	SLC5A9	24060	CD14+ Monocyte	-0.976519	1.58176	13.7676	0.000523041	0.0516949
chr7_41861470_41862186	chr7	41861470	41862186	717	INHBA	158380	CD14+ Monocyte	-0.892772	1.50063	13.7564	0.000523219	0.0516949
chr7_44952982_44953517	chr7	44952982	44953517	536	MYO1G	25498	CD14+ Monocyte	1.48078	0.847242	13.499	0.000524665	0.0516949
chr9_112887259_112887991	chr9	112887259	112887991	733	SLC46A2	2885	CD14+ Monocyte	-0.589599	3.04428	13.8102	0.000524816	0.0516949
chr11_112129520_112130203	chr11	112129520	112130203	684	IL18	33891	CD14+ Monocyte	-0.619242	3.17881	13.8133	0.000524998	0.0516949
chr5_168159202_168159991	chr5	168159202	168159991	790	WWC1	131653	CD14+ Monocyte	-1.13387	2.87803	13.8058	0.00052646	0.0517796
chr17_64439973_64440277	chr17	64439973	64440277	305	MILR1	8837	CD14+ Monocyte	1.14991	2.4632	13.7735	0.000528693	0.0518987
chrX_118552349_118553128	chrX	118552349	118553128	780	DOCK11	56441	CD14+ Monocyte	1.03284	2.3926	13.7666	0.000528877	0.0518987
chr17_41734054_41734708	chr17	41734054	41734708	655	HAP1	62	CD14+ Monocyte	1.3037	1.27662	13.5591	0.000529581	0.0519086
chr1_31815699_31816213	chr1	31815699	31816213	515	SPOCD1	162	CD14+ Monocyte	0.70617	2.76529	13.7684	0.000531015	0.05199
chr9_137021749_137022564	chr9	137021749	137022564	816	C9orf139	4899	CD14+ Monocyte	0.701522	4.86009	13.7679	0.00053341	0.0520592
chr18_56568887_56569963	chr18	56568887	56569963	1077	TXNL1	68629	CD14+ Monocyte	-0.568286	3.07922	13.7672	0.000534871	0.0520592
chr22_29205903_29206684	chr22	29205903	29206684	782	EMID1	8	CD14+ Monocyte	1.13019	1.52653	13.6093	0.000535032	0.0520592
chr11_62925448_62926809	chr11	62925448	62926809	1362	SLC3A2	43750	CD14+ Monocyte	1.5954	0.634375	13.3718	0.000535227	0.0520592
chr19_11191175_11191820	chr19	11191175	11191820	646	KANK2	5725	CD14+ Monocyte	0.883245	1.66362	13.5669	0.000535591	0.0520592
chr20_50270646_50270901	chr20	50270646	50270901	256	LINC01270	21818	CD14+ Monocyte	-0.586654	3.437	13.763	0.000535957	0.0520592
chr13_39451421_39452792	chr13	39451421	39452792	1372	LHFPL6	150401	CD14+ Monocyte	-0.669884	3.60719	13.753	0.000537473	0.0520888
chr10_87657354_87658006	chr10	87657354	87658006	653	PAPSS2	1871	CD14+ Monocyte	-0.60926	3.32303	13.7533	0.000537705	0.0520888
chr5_135999133_135999990	chr5	135999133	135999990	858	TGFBI	28997	CD14+ Monocyte	-0.585946	4.14694	13.7453	0.00053859	0.0520888
chr2_48415156_48416455	chr2	48415156	48416455	1300	PPP1R21	24310	CD14+ Monocyte	-0.671019	3.12816	13.75	0.000538682	0.0520888
chr22_18109895_18111243	chr22	18109895	18111243	1349	TUBA8	435	CD14+ Monocyte	1.47089	0.869013	13.4711	0.000540779	0.0521932
chr6_32525999_32526263	chr6	32525999	32526263	265	HLA-DRB5	4024	CD14+ Monocyte	-1.27312	0.883383	13.4213	0.000540975	0.0521932
chr5_10746447_10747491	chr5	10746447	10747491	1045	DAP	13743	CD14+ Monocyte	-0.815431	2.24491	13.7083	0.000543164	0.0523297
chr11_15792939_15793613	chr11	15792939	15793613	675	LINC02751	168835	CD14+ Monocyte	1.68046	1.70194	13.5887	0.000544157	0.0523297
chr1_11645814_11646140	chr1	11645814	11646140	327	FBXO44	8266	CD14+ Monocyte	0.764226	2.10135	13.6742	0.000544215	0.0523297
chr1_207866647_207867110	chr1	207866647	207867110	464	MIR29B2CHG	43944	CD14+ Monocyte	-0.687053	3.00509	13.7211	0.000545095	0.0523559
chr7_20507915_20508749	chr7	20507915	20508749	835	ABCB5	106917	CD14+ Monocyte	-0.578441	3.49035	13.7162	0.000545767	0.052362
chr1_23723667_23724001	chr1	23723667	23724001	335	ELOA	19364	CD14+ Monocyte	-0.882391	1.63777	13.6385	0.000547839	0.0524944
chr10_124083715_124085011	chr10	124083715	124085011	1297	CHST15	7395	CD14+ Monocyte	-1.07593	1.66551	13.665	0.000548367	0.0524944
chr1_205663407_205664658	chr1	205663407	205664658	1252	SLC45A3	15851	CD14+ Monocyte	-0.758622	2.56706	13.6987	0.0005503	0.0526023
chr2_46315085_46315833	chr2	46315085	46315833	749	EPAS1	17679	CD14+ Monocyte	1.18401	1.50243	13.5564	0.000550716	0.0526023
chr1_101190859_101191705	chr1	101190859	101191705	847	S1PR1	45043	CD14+ Monocyte	-0.748561	1.49527	13.4798	0.000554715	0.0528668
chr1_52569155_52570403	chr1	52569155	52570403	1249	TUT4	16063	CD14+ Monocyte	-0.60136	2.7638	13.6772	0.000555357	0.0528695
chr12_109518591_109519344	chr12	109518591	109519344	754	UBE3B	40958	CD14+ Monocyte	1.13849	1.20126	13.4958	0.000556179	0.0528892
chr3_15081576_15082926	chr3	15081576	15082926	1351	RBSN	16222	CD14+ Monocyte	1.29955	1.97772	13.5476	0.000557095	0.0529179
chr19_19627327_19629310	chr19	19627327	19629310	1984	LPAR2	893	CD14+ Monocyte	0.58956	3.8583	13.6554	0.000559661	0.053103
chr1_46369729_46370491	chr1	46369729	46370491	763	FAAH	23825	CD14+ Monocyte	-0.574863	2.67083	13.6456	0.000561457	0.0531582
chr1_203592539_203594181	chr1	203592539	203594181	1643	ATP2B4	32605	CD14+ Monocyte	-0.513159	3.19157	13.6421	0.000563284	0.0531582
chr21_45874860_45875612	chr21	45874860	45875612	753	PCBP3	26711	CD14+ Monocyte	2.0064	0.987612	13.369	0.000563291	0.0531582
chr19_57888305_57889454	chr19	57888305	57889454	1150	ZNF814	417	CD14+ Monocyte	-0.78679	2.56585	13.6394	0.000563397	0.0531582
chr12_12809089_12809643	chr12	12809089	12809643	555	DDX47	3702	CD14+ Monocyte	-0.516219	3.00068	13.6397	0.000563949	0.0531582
chr14_59849235_59850442	chr14	59849235	59850442	1208	RTN1	20334	CD14+ Monocyte	-0.708469	3.69227	13.629	0.000565487	0.0532308
chr1_108063481_108064264	chr1	108063481	108064264	784	VAV3	98301	CD14+ Monocyte	-0.870786	1.7726	13.5644	0.000566587	0.0532308
chr1_28353731_28354710	chr1	28353731	28354710	980	PHACTR4	15029	CD14+ Monocyte	1.35077	1.75275	13.4993	0.000566935	0.0532308
chr12_21456335_21457006	chr12	21456335	21457006	672	PYROXD1	18421	CD14+ Monocyte	1.25585	1.33149	13.4679	0.000568008	0.0532308
chr12_55001280_55001864	chr12	55001280	55001864	585	TESPA1	16518	CD14+ Monocyte	-0.871734	1.3739	13.5483	0.000568419	0.0532308
chr7_54831355_54832140	chr7	54831355	54832140	786	SEC61G	72109	CD14+ Monocyte	-1.16777	1.39155	13.54	0.000568492	0.0532308
chr9_76588262_76588749	chr9	76588262	76588749	488	GCNT1	87630	CD14+ Monocyte	-0.797982	1.67685	13.5319	0.000569195	0.0532308
chr6_124443440_124443892	chr6	124443440	124443892	453	NKAIN2	160436	CD14+ Monocyte	-1.2716	1.15188	13.4424	0.000569981	0.0532308
chr12_112939835_112940390	chr12	112939835	112940390	556	OAS3	1362	CD14+ Monocyte	0.737401	2.75702	13.6032	0.000570285	0.0532308
chr2_165897354_165898654	chr2	165897354	165898654	1301	TTC21B-AS1	35202	CD14+ Monocyte	-0.643382	3.11152	13.6087	0.000571687	0.0532743
chr7_54823601_54824401	chr7	54823601	54824401	801	SEC61G	64355	CD14+ Monocyte	-0.776639	3.78673	13.6009	0.00057199	0.0532743
chr7_262941_264319	chr7	262941	264319	1379	FAM20C	70371	CD14+ Monocyte	1.03476	1.44683	13.4859	0.000572936	0.0533018
chr1_218468785_218469362	chr1	218468785	218469362	578	TGFB2-AS1	123107	CD14+ Monocyte	-0.686714	2.84582	13.5999	0.000573524	0.0533018
chr12_64293813_64294675	chr12	64293813	64294675	863	C12orf66	71517	CD14+ Monocyte	-1.11634	1.75888	13.5378	0.000580391	0.0538818
chr9_76351781_76352596	chr9	76351781	76352596	816	RFK	41830	CD14+ Monocyte	-0.644195	2.50428	13.5701	0.000581127	0.053892
chr11_1748258_1749441	chr11	1748258	1749441	1184	IFITM10	1154	CD14+ Monocyte	0.706999	2.78259	13.5413	0.000582424	0.0539123
chr3_114519323_114519943	chr3	114519323	114519943	621	ZBTB20-AS5	65731	CD14+ Monocyte	-1.47492	1.22643	13.4568	0.000582732	0.0539123
chr16_391750_392353	chr16	391750	392353	604	NME4	4375	CD14+ Monocyte	0.79661	2.61562	13.5574	0.000583451	0.0539123
chr13_27267575_27268037	chr13	27267575	27268037	463	RASL11A	2792	CD14+ Monocyte	-0.659081	2.06264	13.515	0.000585123	0.0539123
chr4_67899072_67899683	chr4	67899072	67899683	612	TMPRSS11D	15070	CD14+ Monocyte	-0.883209	1.16304	13.4008	0.00058525	0.0539123
chr19_11110052_11110881	chr19	11110052	11110881	830	LDLR	20590	CD14+ Monocyte	1.12867	1.42424	13.2301	0.00058532	0.0539123
chr8_96144676_96146103	chr8	96144676	96146103	1428	GDF6	14703	CD14+ Monocyte	1.10663	1.60409	13.4418	0.000585969	0.0539123
chr14_35196551_35197284	chr14	35196551	35197284	734	PRORP	74000	CD14+ Monocyte	1.49195	0.957311	13.2309	0.000586396	0.0539123
chr17_180723_182600	chr17	180723	182600	1878	DOC2B	927	CD14+ Monocyte	1.30922	2.18589	13.4691	0.000587165	0.0539123
chr7_148584176_148584928	chr7	148584176	148584928	753	C7orf33	5837	CD14+ Monocyte	0.741895	2.12784	13.4995	0.000587619	0.0539123
chr1_25099168_25099804	chr1	25099168	25099804	637	SYF2	132698	CD14+ Monocyte	-0.759127	2.88661	13.538	0.000588702	0.0539123
chr5_17282220_17283576	chr5	17282220	17283576	1357	BASP1	64590	CD14+ Monocyte	-0.799966	1.48956	13.4902	0.000588863	0.0539123
chr19_47697838_47698669	chr19	47697838	47698669	832	EHD2	14752	CD14+ Monocyte	0.56653	3.10779	13.5314	0.000590125	0.0539396
chr1_157490355_157490851	chr1	157490355	157490851	497	FCRL5	61664	CD14+ Monocyte	0.974764	1.5675	13.4484	0.000591184	0.0539396
chr15_93141367_93141878	chr15	93141367	93141878	512	RGMA	52156	CD14+ Monocyte	-1.42107	1.45689	13.4154	0.000591577	0.0539396
chr2_174522590_174523216	chr2	174522590	174523216	627	GPR155	35502	CD14+ Monocyte	-0.63046	2.69839	13.5174	0.000592794	0.0539396
chr8_143023986_143024818	chr8	143023986	143024818	833	LY6E	5458	CD14+ Monocyte	0.942682	3.57053	13.5157	0.00059352	0.0539396
chr18_79902817_79903603	chr18	79902817	79903603	787	KCNG2	39150	CD14+ Monocyte	1.35009	0.877969	13.1648	0.000593548	0.0539396
chr20_5529444_5530222	chr20	5529444	5530222	779	LINC01729	19442	CD14+ Monocyte	0.551404	3.29683	13.5115	0.000594741	0.053991
chr1_32870147_32871800	chr1	32870147	32871800	1654	FNDC5	684	CD14+ Monocyte	1.06106	1.56164	13.3362	0.000598479	0.0540824
chr2_173043230_173044086	chr2	173043230	173044086	857	MAP3K20	31759	CD14+ Monocyte	-0.527452	4.33914	13.4895	0.000598831	0.0540824
chr19_16065292_16065548	chr19	16065292	16065548	257	LINC01855	138	CD14+ Monocyte	1.83225	1.12309	13.224	0.000598891	0.0540824
chr5_83565071_83566179	chr5	83565071	83566179	1109	VCAN-AS1	2757	CD14+ Monocyte	1.45297	1.30549	13.2942	0.000601601	0.0542702
chr12_111766348_111767619	chr12	111766348	111767619	1272	ALDH2	584	CD14+ Monocyte	-0.55887	3.65785	13.4778	0.000602469	0.0542916
chr12_65278018_65279673	chr12	65278018	65279673	1656	MSRB3	664	CD14+ Monocyte	0.570484	3.41276	13.4699	0.000605313	0.0544162
chr1_1039654_1041196	chr1	1039654	1041196	1543	AGRN	5662	CD14+ Monocyte	0.681444	4.00084	13.46	0.000606969	0.0544162
chr20_38858892_38859648	chr20	38858892	38859648	757	PPP1R16B	53196	CD14+ Monocyte	1.19438	1.37947	13.3571	0.000607019	0.0544162
chr1_203638379_203639551	chr1	203638379	203639551	1173	ATP2B4	10443	CD14+ Monocyte	-0.580826	3.1842	13.462	0.000607095	0.0544162
chr5_160692226_160692835	chr5	160692226	160692835	610	MIR3142HG	223976	CD14+ Monocyte	-1.07075	0.868843	13.2433	0.000607645	0.0544162
chr2_204255332_204256039	chr2	204255332	204256039	708	PARD3B	289435	CD14+ Monocyte	-1.11224	1.9731	13.4501	0.000609481	0.0545238
chr19_45670684_45671382	chr19	45670684	45671382	699	GIPR	2464	CD14+ Monocyte	0.741811	4.00591	13.4414	0.000611739	0.054669
chr2_132374464_132375302	chr2	132374464	132375302	839	ANKRD30BL	116431	CD14+ Monocyte	-1.02781	1.02497	13.1932	0.000614315	0.0548423
chr6_6395720_6396500	chr6	6395720	6396500	781	F13A1	75058	CD14+ Monocyte	-0.551333	2.97583	13.4306	0.000615736	0.0549122
chrX_74343543_74344596	chrX	74343543	74344596	1054	FTX	49969	CD14+ Monocyte	-0.601255	3.11811	13.4229	0.000616784	0.0549487
chr16_85967068_85967747	chr16	85967068	85967747	680	IRF8	64054	CD14+ Monocyte	-0.955384	1.57903	13.3334	0.000617509	0.0549564
chr4_7033420_7034452	chr4	7033420	7034452	1033	CCDC96	8549	CD14+ Monocyte	1.20125	2.84294	13.4002	0.000619643	0.0550612
chr3_42683642_42684479	chr3	42683642	42684479	838	HHATL	17042	CD14+ Monocyte	1.11062	2.59907	13.3934	0.000619966	0.0550612
chrX_73955505_73956147	chrX	73955505	73956147	643	JPX	11182	CD14+ Monocyte	1.41703	1.02747	13.1023	0.000624037	0.0553656
chr8_95235703_95236221	chr8	95235703	95236221	519	C8orf37-AS1	32614	CD14+ Monocyte	1.45234	1.4275	13.2369	0.000624918	0.0553867
chr19_51440951_51442337	chr19	51440951	51442337	1387	SIGLEC8	16117	CD14+ Monocyte	0.679981	3.54182	13.3848	0.000625707	0.0553995
chr12_78457721_78458605	chr12	78457721	78458605	885	SYT1	405376	CD14+ Monocyte	-1.06813	1.70225	13.3465	0.00062793	0.0554874
chr5_133456605_133457847	chr5	133456605	133457847	1243	FSTL4	154694	CD14+ Monocyte	-0.769113	1.94921	13.3628	0.000627989	0.0554874
chr7_72936971_72937849	chr7	72936971	72937849	879	TRIM73	31617	CD14+ Monocyte	-0.99939	0.927175	13.1335	0.00063331	0.0559002
chr5_61323045_61323325	chr5	61323045	61323325	281	ZSWIM6	8932	CD14+ Monocyte	-0.977066	1.51933	13.2295	0.000635999	0.0559513
chr12_132529476_132530560	chr12	132529476	132530560	1085	FBRSL1	24071	CD14+ Monocyte	1.04675	3.05524	13.3459	0.000636211	0.0559513
chr3_128242882_128243964	chr3	128242882	128243964	1083	RUVBL1	88968	CD14+ Monocyte	1.11185	2.75037	13.3341	0.000636784	0.0559513
chr10_102241383_102241806	chr10	102241383	102241806	424	GBF1	3725	CD14+ Monocyte	0.538139	4.34686	13.341	0.00063714	0.0559513
chr1_234666416_234667013	chr1	234666416	234667013	598	LINC00184	37106	CD14+ Monocyte	-1.11063	1.09595	13.094	0.000639032	0.0559881
chr10_126049636_126050480	chr10	126049636	126050480	845	FANK1	152831	CD14+ Monocyte	-0.955661	1.04888	13.1543	0.000639511	0.0559881
chr7_135575174_135575713	chr7	135575174	135575713	540	NUP205	17258	CD14+ Monocyte	1.48442	0.896236	13.0229	0.000649183	0.0566382
chr22_46895749_46896525	chr22	46895749	46896525	777	TBC1D22A-AS1	19517	CD14+ Monocyte	-1.04893	0.930904	13.1132	0.000649846	0.0566382
chr8_60792570_60793220	chr8	60792570	60793220	651	CHD7	51312	CD14+ Monocyte	1.14898	1.19804	13.147	0.000650296	0.0566382
chr9_27184617_27184970	chr9	27184617	27184970	354	TEK	75168	CD14+ Monocyte	-3.15366	0.239841	12.8894	0.000650575	0.0566382
chr19_45498435_45499622	chr19	45498435	45499622	1188	PPM1N	37	CD14+ Monocyte	0.547005	3.64837	13.2948	0.000650654	0.0566382
chr10_30985733_30986675	chr10	30985733	30986675	943	ZNF438	12842	CD14+ Monocyte	1.22389	2.15262	13.2557	0.000651279	0.0566382
chr9_89786494_89787188	chr9	89786494	89787188	695	GADD45G	181483	CD14+ Monocyte	-0.735284	2.73038	13.2926	0.000651675	0.0566382
chr2_15498521_15499070	chr2	15498521	15499070	550	NBAS	62264	CD14+ Monocyte	1.52663	0.875934	13.0082	0.000652201	0.0566382
chr7_148620599_148621302	chr7	148620599	148621302	704	C7orf33	29834	CD14+ Monocyte	0.969615	3.83606	13.2839	0.000653384	0.0566837
chr5_115472327_115473186	chr5	115472327	115473186	860	FEM1C	71589	CD14+ Monocyte	-0.905943	1.61013	13.2266	0.000656233	0.0568454
chr19_51816636_51817155	chr19	51816636	51817155	520	FPR3	21480	CD14+ Monocyte	-0.823855	2.05517	13.0614	0.000660697	0.0571453
chr20_63101762_63103373	chr20	63101762	63103373	1612	HAR1A	471	CD14+ Monocyte	0.866262	2.34673	13.2068	0.000661899	0.0571454
chr7_37728581_37729330	chr7	37728581	37729330	750	GPR141	44816	CD14+ Monocyte	-0.845789	2.51609	13.2439	0.000662026	0.0571454
chr11_68008956_68009310	chr11	68008956	68009310	355	ALDH3B1	410	CD14+ Monocyte	-0.799949	2.98776	13.2509	0.000662713	0.0571474
chr16_3798630_3799451	chr16	3798630	3799451	822	CREBBP	80669	CD14+ Monocyte	1.25787	1.33799	13.0045	0.000665501	0.0573304
chrX_53287367_53288721	chrX	53287367	53288721	1355	IQSEC2	5783	CD14+ Monocyte	-0.55527	3.48901	13.2317	0.000667821	0.0574727
chr6_32936189_32936891	chr6	32936189	32936891	703	HLA-DMB	4137	CD14+ Monocyte	-0.611362	2.68376	13.2232	0.000668679	0.057489
chr15_59327666_59328452	chr15	59327666	59328452	787	MYO1E	44419	CD14+ Monocyte	-0.798223	2.08314	13.2241	0.000670606	0.0575972
chr2_101179708_101180616	chr2	101179708	101180616	909	TBC1D8-AS1	28049	CD14+ Monocyte	-0.694868	3.78321	13.2091	0.000673604	0.0577428
chr1_55217584_55217907	chr1	55217584	55217907	324	MIR4422HG	47	CD14+ Monocyte	-0.573053	2.95	13.2116	0.00067413	0.0577428
chr2_46951062_46952097	chr2	46951062	46952097	1036	MCFD2	9207	CD14+ Monocyte	-0.755006	1.91192	13.1619	0.000674913	0.0577428
chr13_31880287_31881431	chr13	31880287	31881431	1145	RXFP2	140746	CD14+ Monocyte	-0.837943	1.18235	13.0812	0.000675166	0.0577428
chr5_14593502_14593747	chr5	14593502	14593747	246	OTULINL	11711	CD14+ Monocyte	-1.08543	0.942361	12.8502	0.000675656	0.0577428
chr14_92529971_92530182	chr14	92529971	92530182	212	RIN3	16191	CD14+ Monocyte	1.58039	0.892982	12.8397	0.000679041	0.0579745
chr6_158661115_158661525	chr6	158661115	158661525	411	SYTL3	1877	CD14+ Monocyte	-1.24886	0.65847	12.7921	0.000685661	0.0582071
chr1_192907636_192908645	chr1	192907636	192908645	1010	RGS2	98598	CD14+ Monocyte	-0.503365	3.58783	13.1662	0.000685959	0.0582071
chr1_997155_997405	chr1	997155	997405	251	HES4	2692	CD14+ Monocyte	1.38203	1.54129	12.917	0.00068606	0.0582071
chr12_52372477_52372998	chr12	52372477	52372998	522	KRT81	80943	CD14+ Monocyte	1.15874	1.08494	12.995	0.000686596	0.0582071
chr4_184400118_184401585	chr4	184400118	184401585	1468	LINC02362	17812	CD14+ Monocyte	1.23826	1.697	12.9104	0.000688345	0.0582071
chr9_34674823_34675643	chr9	34674823	34675643	821	CCL27	12166	CD14+ Monocyte	-0.650527	2.2188	13.1415	0.000688705	0.0582071
chr20_62366698_62368478	chr20	62366698	62368478	1781	LAMA5	614	CD14+ Monocyte	0.741031	2.66989	13.1492	0.000688911	0.0582071
chr3_119587889_119589892	chr3	119587889	119589892	2004	PLA1A	7955	CD14+ Monocyte	-0.5319	3.90652	13.1496	0.000690612	0.0582071
chr3_117044994_117045649	chr3	117044994	117045649	656	LSAMP	599507	CD14+ Monocyte	-0.973817	0.96991	12.9197	0.000691274	0.0582071
chr3_45553181_45554865	chr3	45553181	45554865	1685	LIMD1	39885	CD14+ Monocyte	-0.620746	3.02236	13.1519	0.000691443	0.0582071
chr21_17536452_17536840	chr21	17536452	17536840	389	CXADR	23410	CD14+ Monocyte	-1.1426	1.00711	12.9774	0.000691625	0.0582071
chr12_47717439_47718083	chr12	47717439	47718083	645	ENDOU	7407	CD14+ Monocyte	-0.799887	2.63939	13.1464	0.00069224	0.0582071
chr2_130202249_130202874	chr2	130202249	130202874	626	MZT2B	19988	CD14+ Monocyte	-1.0268	1.13394	12.9939	0.000692503	0.0582071
chr3_9390372_9391396	chr3	9390372	9391396	1025	THUMPD3-AS1	5227	CD14+ Monocyte	0.820936	2.77557	13.1399	0.000692588	0.0582071
chr20_54090102_54091088	chr20	54090102	54091088	987	BCAS1	19337	CD14+ Monocyte	-1.06229	1.56596	13.0974	0.000693558	0.0582142
chr21_37815583_37816455	chr21	37815583	37816455	873	KCNJ6	100002	CD14+ Monocyte	-0.969238	2.49581	13.1399	0.000694341	0.0582142
chr17_2802896_2803950	chr17	2802896	2803950	1055	RAP1GAP2	6459	CD14+ Monocyte	1.10275	1.9453	13.0444	0.000694701	0.0582142
chr1_156910200_156910779	chr1	156910200	156910779	580	LRRC71	9852	CD14+ Monocyte	0.846079	1.62978	13.0628	0.000696217	0.0582657
chr22_31526013_31526771	chr22	31526013	31526771	759	SFI1	29478	CD14+ Monocyte	0.901377	3.10535	13.1192	0.000698953	0.0582657
chr17_78232056_78233257	chr17	78232056	78233257	1202	BIRC5	17804	CD14+ Monocyte	1.22499	1.49886	12.9718	0.000699377	0.0582657
chr22_26529146_26530001	chr22	26529146	26530001	856	TFIP11	16640	CD14+ Monocyte	1.27989	2.45709	13.0566	0.000700656	0.0583157
chr2_144477517_144478459	chr2	144477517	144478459	943	ZEB2-AS1	41154	CD14+ Monocyte	0.894455	1.42767	12.9548	0.000702593	0.0583601
chr17_2438565_2439420	chr17	2438565	2439420	856	MNT	37505	CD14+ Monocyte	0.532852	3.6233	13.1077	0.000703601	0.0583601
chr22_21925918_21927851	chr22	21925918	21927851	1934	PPM1F	24997	CD14+ Monocyte	1.42845	1.04449	12.8522	0.000704572	0.0583601
chr5_150393233_150393602	chr5	150393233	150393602	370	CD74	19154	CD14+ Monocyte	-0.858878	2.59522	13.0866	0.000705257	0.0583601
chr13_102680188_102681661	chr13	102680188	102681661	1474	CCDC168	77411	CD14+ Monocyte	1.1289	2.90248	13.0901	0.000706134	0.0583765
chr15_63381231_63382346	chr15	63381231	63382346	1116	CA12	236	CD14+ Monocyte	0.776114	2.4508	13.0554	0.000708701	0.0584816
chr3_52397091_52398415	chr3	52397091	52398415	1325	BAP1	11593	CD14+ Monocyte	0.99075	1.51841	12.9701	0.000708765	0.0584816
chr20_62695603_62696360	chr20	62695603	62696360	758	NTSR1	12475	CD14+ Monocyte	1.12412	2.72532	13.0784	0.000709566	0.0584916
chr15_92957974_92958552	chr15	92957974	92958552	579	CHD2	57651	CD14+ Monocyte	1.37563	0.87084	12.8014	0.000711573	0.0586009
chr14_91032086_91032725	chr14	91032086	91032725	640	RPS6KA5	27399	CD14+ Monocyte	-0.936814	1.23047	12.9737	0.000713176	0.0586207
chr11_9510671_9511424	chr11	9510671	9511424	754	ZNF143	49660	CD14+ Monocyte	1.33036	0.687496	12.7304	0.000715635	0.0587668
chr5_57242940_57243974	chr5	57242940	57243974	1035	GPBP1	28867	CD14+ Monocyte	1.11008	2.304	12.9968	0.000716351	0.0587695
chr1_1032403_1033544	chr1	1032403	1033544	1142	AGRN	448	CD14+ Monocyte	0.625281	3.53821	13.0608	0.000717708	0.0587952
chr9_136713050_136714691	chr9	136713050	136714691	1642	DIPK1B	479	CD14+ Monocyte	0.852204	2.1072	12.9723	0.000718534	0.0587952
chr19_14237358_14238173	chr19	14237358	14238173	816	ADGRL1	31189	CD14+ Monocyte	1.0737	1.34105	12.8327	0.000718714	0.0587952
chr3_71421742_71422574	chr3	71421742	71422574	833	FOXP1	116971	CD14+ Monocyte	-1.12913	0.955101	12.8056	0.000723716	0.0590413
chr2_196696344_196697020	chr2	196696344	196697020	677	CCDC150	16517	CD14+ Monocyte	1.1583	0.990806	12.786	0.000723781	0.0590413
chr19_4506214_4507086	chr19	4506214	4507086	873	PLIN4	11400	CD14+ Monocyte	1.27424	1.09789	12.7398	0.000725475	0.0590937
chr18_58500916_58501544	chr18	58500916	58501544	629	ALPK2	127547	CD14+ Monocyte	-1.03767	0.886144	12.8577	0.0007266	0.0590937
chr7_36746178_36746735	chr7	36746178	36746735	558	AOAH	21629	CD14+ Monocyte	-0.639159	2.7856	13.0244	0.000727218	0.0590937
chr13_42892432_42893921	chr13	42892432	42893921	1490	LINC00428	19688	CD14+ Monocyte	0.871431	2.83269	13.0208	0.000728119	0.0590937
chr15_66390711_66390998	chr15	66390711	66390998	288	MAP2K1	3800	CD14+ Monocyte	-0.648497	3.38666	13.0238	0.000728543	0.0590937
chr19_51019883_51020496	chr19	51019883	51020496	614	KLK10	22	CD14+ Monocyte	1.17273	1.15055	12.7906	0.000729781	0.0591384
chr6_6569028_6569749	chr6	6569028	6569749	722	LY86	18970	CD14+ Monocyte	-0.78926	1.58137	12.9562	0.000737272	0.0596331
chr21_34830794_34831254	chr21	34830794	34831254	461	RUNX1	57445	CD14+ Monocyte	0.980039	2.57802	12.9449	0.000739906	0.0596678
chr12_27001128_27002105	chr12	27001128	27002105	978	TM7SF3	12279	CD14+ Monocyte	-0.675074	2.35309	12.9861	0.000740085	0.0596678
chr18_3051449_3052785	chr18	3051449	3052785	1337	LPIN2	38305	CD14+ Monocyte	-0.687506	2.63326	12.9901	0.000740443	0.0596678
chr6_32096002_32097107	chr6	32096002	32097107	1106	TNXB	12231	CD14+ Monocyte	1.54385	0.760743	12.6572	0.000741002	0.0596678
chr19_13926617_13927765	chr19	13926617	13927765	1149	PODNL1	10652	CD14+ Monocyte	1.361	1.57533	12.8298	0.000741421	0.0596678
chr12_56336707_56337147	chr12	56336707	56337147	441	IL23A	1736	CD14+ Monocyte	-0.514276	3.13045	12.9836	0.000741861	0.0596678
chr10_95782071_95782863	chr10	95782071	95782863	793	ENTPD1	25909	CD14+ Monocyte	-0.502411	2.99842	12.9732	0.000744739	0.0597014
chr5_60521427_60522974	chr5	60521427	60522974	1548	PDE4D	25141	CD14+ Monocyte	-0.648785	3.08967	12.9718	0.000745748	0.0597014
chr3_45537604_45538893	chr3	45537604	45538893	1290	LIMD1	55857	CD14+ Monocyte	-0.670881	3.12437	12.9692	0.000745979	0.0597014
chr1_6961995_6964040	chr1	6961995	6964040	2046	CAMTA1	176542	CD14+ Monocyte	1.01655	2.38243	12.9556	0.000746127	0.0597014
chr3_172591858_172592834	chr3	172591858	172592834	977	LINC02068	2773	CD14+ Monocyte	0.909857	3.60259	12.9669	0.000746443	0.0597014
chr15_41374395_41375589	chr15	41374395	41375589	1195	NDUFAF1	26907	CD14+ Monocyte	0.644827	3.42266	12.9645	0.000747406	0.0597014
chr3_17247498_17248643	chr3	17247498	17248643	1146	PLCL2	314409	CD14+ Monocyte	0.943066	1.60309	12.8894	0.000747829	0.0597014
chr1_169477952_169479044	chr1	169477952	169479044	1093	SLC19A2	6900	CD14+ Monocyte	-0.798467	1.37652	12.7683	0.000749525	0.0597454
chr16_12573105_12574033	chr16	12573105	12574033	929	CPPED1	229854	CD14+ Monocyte	-0.835193	3.03944	12.9553	0.0007508	0.0597723
chr10_4812048_4812364	chr10	4812048	4812364	317	AKR1E2	13812	CD14+ Monocyte	-0.781582	2.28537	12.9475	0.000752205	0.0597985
chr6_166949541_166951589	chr6	166949541	166951589	2049	RNASET2	4961	CD14+ Monocyte	0.842981	3.62259	12.9457	0.000752519	0.0597985
chr3_27565387_27565745	chr3	27565387	27565745	359	SLC4A7	81003	CD14+ Monocyte	-1.14091	0.805553	12.7451	0.000753501	0.0598213
chr15_52294831_52295958	chr15	52294831	52295958	1128	MYO5C	154	CD14+ Monocyte	1.47432	0.814459	12.6558	0.000754748	0.0598651
chr21_17538995_17540254	chr21	17538995	17540254	1260	CXADR	25953	CD14+ Monocyte	-0.647305	3.13366	12.9374	0.000755899	0.0599012
chr1_16073246_16074023	chr1	16073246	16074023	778	FAM131C	372	CD14+ Monocyte	1.38231	1.19124	12.733	0.000757026	0.0599353
chr20_49694075_49695497	chr20	49694075	49695497	1423	B4GALT5	18381	CD14+ Monocyte	1.33726	1.83139	12.7879	0.000758383	0.0599875
chr22_29167019_29167976	chr22	29167019	29167976	958	EMID1	37919	CD14+ Monocyte	1.10354	2.3116	12.8981	0.000760425	0.0600938
chr6_34189916_34190933	chr6	34189916	34190933	1018	GRM4	34294	CD14+ Monocyte	-0.690643	2.6978	12.9209	0.000761804	0.0600987
chr3_13189413_13190326	chr3	13189413	13190326	914	IQSEC1	92931	CD14+ Monocyte	0.899962	3.77001	12.9155	0.000762109	0.0600987
chr1_183209394_183210165	chr1	183209394	183210165	772	LAMC2	23131	CD14+ Monocyte	1.08646	2.18347	12.8782	0.000765502	0.0602225
chr6_156697156_156697980	chr6	156697156	156697980	825	ARID1B	78045	CD14+ Monocyte	-0.686832	2.16585	12.8964	0.000765702	0.0602225
chr19_55178946_55180544	chr19	55178946	55180544	1599	SYT5	255	CD14+ Monocyte	0.716472	3.32987	12.9053	0.000766252	0.0602225
chr1_192926390_192927254	chr1	192926390	192927254	865	RGS2	117352	CD14+ Monocyte	-0.947628	1.8771	12.8719	0.000767089	0.0602333
chr20_3989213_3989954	chr20	3989213	3989954	742	RNF24	25604	CD14+ Monocyte	0.87083	1.95169	12.8052	0.000769693	0.0602792
chr22_36881801_36882390	chr22	36881801	36882390	590	NCF4	20796	CD14+ Monocyte	1.0048	1.84423	12.7596	0.000770345	0.0602792
chr1_93317145_93317844	chr1	93317145	93317844	700	CCDC18-AS1	27967	CD14+ Monocyte	-0.837567	2.08424	12.8775	0.000770476	0.0602792
chr2_28445826_28446185	chr2	28445826	28446185	360	PLB1	49874	CD14+ Monocyte	1.04451	3.30484	12.8849	0.000773018	0.0604232
chr9_111966734_111967395	chr9	111966734	111967395	662	UGCG	69921	CD14+ Monocyte	1.49634	0.6725	12.58	0.000775889	0.0605479
chr15_59296187_59296488	chr15	59296187	59296488	302	MYO1E	76383	CD14+ Monocyte	-0.804212	1.50496	12.7824	0.000776021	0.0605479
chr19_17797425_17797934	chr19	17797425	17797934	510	B3GNT3	2288	CD14+ Monocyte	1.70873	1.09588	12.6042	0.000779181	0.0607394
chr17_58420750_58421193	chr17	58420750	58421193	444	RNF43	3216	CD14+ Monocyte	1.28004	1.08865	12.6035	0.000781466	0.0608624
chr12_26874181_26875096	chr12	26874181	26875096	916	ITPR2	40987	CD14+ Monocyte	-0.646744	3.32548	12.8529	0.000782804	0.0609115
chr14_65047815_65048261	chr14	65047815	65048261	447	MAX	54256	CD14+ Monocyte	1.03367	1.72063	12.7438	0.000784117	0.0609586
chr14_105567016_105569014	chr14	105567016	105569014	1999	TMEM121	39912	CD14+ Monocyte	1.41011	1.36188	12.6397	0.000788107	0.0611919
chr19_17743987_17744553	chr19	17743987	17744553	567	FCHO1	3190	CD14+ Monocyte	0.83449	3.3353	12.8335	0.000789097	0.0611919
chr20_5657390_5657895	chr20	5657390	5657895	506	GPCPD1	46384	CD14+ Monocyte	-0.539247	4.25525	12.8313	0.000789252	0.0611919
chr16_89256668_89257615	chr16	89256668	89257615	948	ZNF778	38966	CD14+ Monocyte	0.712762	4.3575	12.8244	0.000791322	0.061242
chr15_90326560_90326839	chr15	90326560	90326839	280	ZNF774	25444	CD14+ Monocyte	1.22117	1.59217	12.6987	0.000796415	0.0615444
chr1_209703794_209705108	chr1	209703794	209705108	1315	HSD11B1	263	CD14+ Monocyte	0.899361	1.53028	12.6943	0.000798137	0.0615444
chr6_111871280_111871609	chr6	111871280	111871609	330	FYN	1462	CD14+ Monocyte	-0.603256	2.59273	12.8046	0.000799341	0.0615444
chr14_56333366_56334295	chr14	56333366	56334295	930	PELI2	214956	CD14+ Monocyte	-0.500811	3.14434	12.8041	0.000799775	0.0615444
chr16_85833246_85833698	chr16	85833246	85833698	453	COX4I1	33552	CD14+ Monocyte	-0.903556	1.39014	12.6343	0.000800305	0.0615444
chr3_27553780_27555229	chr3	27553780	27555229	1450	SLC4A7	69396	CD14+ Monocyte	-0.605584	2.97236	12.799	0.000801612	0.0615444
chr15_30470768_30471398	chr15	30470768	30471398	631	GOLGA8R	56508	CD14+ Monocyte	2.41519	1.74043	12.6996	0.00080175	0.0615444
chr17_61451390_61452909	chr17	61451390	61452909	1520	TBX2	51548	CD14+ Monocyte	0.967099	1.6214	12.6686	0.000801837	0.0615444
chr1_46488522_46490226	chr1	46488522	46490226	1705	DMBX1	391	CD14+ Monocyte	0.711938	2.65599	12.7759	0.000802819	0.0615444
chr22_46604190_46604863	chr22	46604190	46604863	674	GRAMD4	15522	CD14+ Monocyte	-0.537566	3.32807	12.7934	0.00080316	0.0615444
chr1_224203250_224203847	chr1	224203250	224203847	598	DEGS1	19571	CD14+ Monocyte	-0.62154	2.83155	12.7895	0.00080381	0.0615444
chr20_62822675_62823154	chr20	62822675	62823154	480	COL9A3	5626	CD14+ Monocyte	1.15105	1.59081	12.6393	0.000807967	0.0617748
chr17_79942567_79943423	chr17	79942567	79943423	857	TBC1D16	7430	CD14+ Monocyte	1.29496	0.891767	12.469	0.000808255	0.0617748
chr20_3237983_3240396	chr20	3237983	3240396	2414	SLC4A11	204	CD14+ Monocyte	0.55246	3.30885	12.7732	0.000810491	0.0618569
chr4_122746318_122747026	chr4	122746318	122747026	709	BBS12	13615	CD14+ Monocyte	0.889717	2.42046	12.7558	0.000812712	0.0619206
chr1_236869790_236871318	chr1	236869790	236871318	1529	MTR	74499	CD14+ Monocyte	0.504743	3.66947	12.7589	0.000814403	0.0619206
chr5_135543245_135544977	chr5	135543245	135544977	1733	CXCL14	34014	CD14+ Monocyte	0.630037	2.84268	12.7473	0.000814805	0.0619206
chr20_34769498_34770324	chr20	34769498	34770324	827	NCOA6	12080	CD14+ Monocyte	1.13731	1.53056	12.6248	0.000816647	0.0619206
chr5_157582787_157583693	chr5	157582787	157583693	907	ADAM19	7012	CD14+ Monocyte	1.4722	1.08915	12.5111	0.000817353	0.0619206
chr3_45034573_45035375	chr3	45034573	45035375	803	CLEC3B	4431	CD14+ Monocyte	-0.54569	4.1987	12.7475	0.00081741	0.0619206
chr7_2792250_2793532	chr7	2792250	2793532	1283	GNA12	21698	CD14+ Monocyte	-0.678716	3.67559	12.7482	0.000817974	0.0619206
chr16_14345392_14346095	chr16	14345392	14346095	704	MIR193BHG	42888	CD14+ Monocyte	1.41318	1.76051	12.5514	0.00081812	0.0619206
chr5_165029372_165029800	chr5	165029372	165029800	429	MAT2B	1523754	CD14+ Monocyte	-0.986325	1.09113	12.6081	0.000818797	0.0619206
chr5_168146797_168147333	chr5	168146797	168147333	537	WWC1	144311	CD14+ Monocyte	-1.25129	0.896768	12.5619	0.000820295	0.0619313
chr5_149488765_149490004	chr5	149488765	149490004	1240	CSNK1A1	60361	CD14+ Monocyte	1.04792	2.4453	12.7236	0.000820975	0.0619313
chr17_1493080_1493709	chr17	1493080	1493709	630	MYO1C	394	CD14+ Monocyte	-0.554081	3.02923	12.7422	0.000821097	0.0619313
chr6_29627626_29629043	chr6	29627626	29629043	1418	GABBR1	602	CD14+ Monocyte	-0.636179	3.26841	12.7383	0.000822448	0.0619789
chr10_17128175_17128817	chr10	17128175	17128817	643	CUBN	994	CD14+ Monocyte	-0.866118	2.73608	12.7306	0.000825675	0.0621133
chr20_36202768_36203267	chr20	36202768	36203267	500	AAR2	33149	CD14+ Monocyte	0.716082	2.12932	12.7038	0.000826982	0.0621474
chr3_139113057_139114276	chr3	139113057	139114276	1220	PRR23C	68165	CD14+ Monocyte	1.33506	1.07205	12.4292	0.000827572	0.0621474
chr13_42728396_42729109	chr13	42728396	42729109	714	LINC01050	83453	CD14+ Monocyte	-0.953817	1.51757	12.6205	0.000828763	0.0621825
chr3_69330743_69331596	chr3	69330743	69331596	854	FRMD4B	54492	CD14+ Monocyte	-0.986319	2.02156	12.7038	0.000830026	0.062223
chr22_20979289_20979869	chr22	20979289	20979869	581	LZTR1	2427	CD14+ Monocyte	0.567664	4.05302	12.709	0.000831153	0.0622533
chr6_148778641_148779746	chr6	148778641	148779746	1106	UST	31612	CD14+ Monocyte	-0.811341	1.92438	12.6792	0.000834293	0.0623589
chr10_22681833_22682882	chr10	22681833	22682882	1050	PIP4K2A	31226	CD14+ Monocyte	1.19998	0.90134	12.4373	0.000836405	0.0624293
chr11_34957010_34957798	chr11	34957010	34957798	789	PDHX	40393	CD14+ Monocyte	-0.95358	1.12554	12.4444	0.000838134	0.0624896
chr7_133255549_133256016	chr7	133255549	133256016	468	EXOC4	2472	CD14+ Monocyte	-0.633024	2.57293	12.6913	0.000838665	0.0624896
chr12_26705001_26705993	chr12	26705001	26705993	993	ITPR2	127201	CD14+ Monocyte	-0.739701	1.70282	12.6525	0.000842478	0.0625752
chr12_89979615_89980825	chr12	89979615	89980825	1211	LINC02399	31923	CD14+ Monocyte	-0.551521	2.7466	12.6823	0.000842512	0.0625752
chrX_155334479_155335590	chrX	155334479	155335590	1112	CLIC2	135	CD14+ Monocyte	-0.93281	1.37703	12.5568	0.000843214	0.0625752
chr10_6843505_6844679	chr10	6843505	6844679	1175	LINC00707	63908	CD14+ Monocyte	-0.766954	1.78453	12.6643	0.000843771	0.0625752
chr4_155638781_155640679	chr4	155638781	155640679	1899	GUCY1A1	26168	CD14+ Monocyte	0.715032	2.32392	12.6543	0.000844904	0.0625752
[truncated: 3,057 more rows]

## Sheet: COVID_G1 vs Healthy
Peak	chr	start	end	Peak Length	Nearest Expressed Gene	Distance	Cell Type	logFC	logCPM	F	PValue	p.adjusted
[truncated: 27 more rows]

[truncated: 13 more sheets: RSV_G1G2G3 vs COVID_G2G3, COVID_G3_S vs COVID_G3, CD14+ Monocyte, CD16+ Monocyte, CD56dim NK, CD56bright NK, Naive CD8+ T, GZMKhi CD8+ T, Naive CD4+ T, CD4+ TCM, Naive Treg, Naive B, TrB]
