# Supplementary material for: Infants display reduced NK cell responses in RSV and increased inflammatory responses in SARS-CoV-2 infections
Source: Research Square preprint supplement (doi:10.21203/rs.3.rs-5640872/v1), 2025-01-13
Supplement: Supplementary file 3 [file 4084ad3157765fb188d31ec0.xlsx]

## Sheet: Index
Column	Description
Motif	JASPAR Motif
Annotation	Cluster Annotation
Avg. Healthy Dev.	Average ChromVAR deviation score in healthy
Avg. COVID (G2+G3) Dev.	Average ChromVAR deviation score in moderate/severe COVID-19
Avg. RSV Dev.	Average ChromVAR deviation score in mild/moderate/severe RSV
Avg. COVID G1 Dev.	Average ChromVAR deviation score in Subacute COVID-19
Avg. COVID G2 Dev.	Average ChromVAR deviation score in moderate COVID-19
Avg. COVID G3 Dev.	Average ChromVAR deviation score in severe COVID-19
Avg. RSV G1 Dev.	Average ChromVAR deviation score in mild RSV
Avg. RSV G2 Dev.	Average ChromVAR deviation score in moderate RSV
Avg. RSV G3 Dev.	Average ChromVAR deviation score in severe RSV
Kruskal Wallis P-Value	Kruskal Wallis test: healthy, moderate/severe COVID-19, and mild/moderate/severe RSV.
Adjusted KW P-Value	FDR adjusted ruskal Wallis P-Values. Adjuststments made within cell type for expressed motifs.
COVID-19 vs Healthy MW P-Value	Mann Whitney U test p-values: moderate/severe COVID-19 vs Healthy for KW-Pvalues < 0.1
RSV vs Healthy MW P-Value	Mann Whitney U test p-values: mild/moderate/severe RSV vs Healthy for KW-Pvalues < 0.1
RSV vs COVID-19 MW P-Value	Mann Whitney U test p-values: mild/moderate/severe RSV vs moderate/severe COVID-19 for KW-Pvalues < 0.1
COVID-19 vs Healthy Adjusted MW P-Value	FDR Adjusted Mann Whitney p-values for: moderate/severe COVID-19 vs Healthy for KW-Pvalues < 0.1
RSV vs Healthy Adjusted MW P-Value	FDR Adjusted Mann Whitney p-values for: mild/moderate/severe RSV vs Healthy for KW-Pvalues < 0.1
RSV vs COVID-19 Adjusted MW P-Value	FDR Adjusted Mann Whitney p-values for: mild/moderate/severe RSV vs moderate/severe COVID-19 for KW-Pvalues < 0.1
Note: Statistical comparisons performed using median deviation scores

## Sheet: chromVAR Comparisons
Motif	Annotation	Avg. Healthy Dev.	Avg. COVID (G2+G3) Dev.	Avg. RSV Dev.	Avg. COVID G1 Dev.	Avg. COVID G2 Dev.	Avg. COVID G3 Dev.	Avg. RSV G1 Dev.	Avg. RSV G2 Dev.	Avg. RSV G3 Dev.	Kruskal Wallis P-Value	Adjusted KW P-Value	COVID-19 vs Healthy MW P-Value	RSV vs Healthy MW P-Value	RSV vs COVID-19 MW P-Value	COVID-19 vs Healthy Adjusted MW P-Value	RSV vs Healthy Adjusted MW P-Value	RSV vs COVID-19 Adjusted MW P-Value
MA0653.1_IRF9	AIM2hi Memory B	-0.0280506	0.00134106	0.0127443	-0.0194131	-0.00176092	0.00676951	0.0221438	0.00210226	0.0188936	0.00389498	0.204913	0.00670628	0.00281293	0.451663	0.0100594	0.0084388	0.451663
MA0652.1_IRF8	AIM2hi Memory B	-0.0290145	0.00370248	0.0162976	-0.0144953	-0.000543127	0.0111323	0.0221388	0.00298036	0.0279401	0.00429355	0.204913	0.00670628	0.00281293	0.638067	0.0100594	0.0084388	0.638067
MA0051.1_IRF2	AIM2hi Memory B	-0.0204766	0.00124529	0.0140196	-0.0109937	0.00134645	0.00106826	0.0335973	-0.00268406	0.0204555	0.00497769	0.204913	0.0151231	0.00281293	0.323227	0.0226847	0.0084388	0.323227
MA0772.1_IRF7	AIM2hi Memory B	-0.0208836	0.00271077	0.0220726	-0.0175381	6.68369e-05	0.00733764	0.0293537	0.0062782	0.0356455	0.00512283	0.204913	0.0377713	0.00281293	0.144771	0.056657	0.0084388	0.144771
MA0095.2_YY1	AIM2hi Memory B	-0.00575447	-0.00177757	0.0135986	-0.0164295	0.000689031	-0.00609411	0.0107726	0.0165743	0.012011	0.00753715	0.241189	1	0.0112259	0.00967535	1	0.0168389	0.0168389
MA0113.3_NR3C1	AIM2hi Memory B	-0.0264356	-0.0215527	0.00951447	-0.0358322	-0.0267901	-0.0123872	0.0152183	-0.00355792	0.020963	0.0104914	0.279771	0.751334	0.0129414	0.0144411	0.751334	0.0216617	0.0216617
MA0028.2_ELK1	AIM2hi Memory B	-0.011447	-0.000920955	0.00489786	-0.00660722	-0.00489609	0.00603553	0.0148481	0.00416566	-0.000881402	0.013582	0.310445	0.097961	0.00532584	0.187795	0.146941	0.0159775	0.187795
MA0506.1_NRF1	AIM2hi Memory B	-0.00363738	-0.00552874	0.00644001	-0.0126813	-0.00783765	-0.00148816	0.000857433	0.00982503	0.00621253	0.01574	0.314801	0.915878	0.0473361	0.00733364	0.915878	0.0710041	0.0220009
MA0749.1_ZBED1	AIM2hi Memory B	-0.0136776	-0.047508	0.0112519	-0.00516796	-0.0610476	-0.0238137	0.0175236	0.00521325	0.0141159	0.017728	0.315165	0.307226	0.042003	0.0144411	0.307226	0.0630045	0.0433233
MA0145.3_TFCP2	AIM2hi Memory B	-0.00552636	-0.0290618	-0.000313677	-0.0149684	-0.0392569	-0.0112205	0.00180276	0.00937426	-0.0130272	0.0227026	0.363241	0.113102	0.352952	0.00733364	0.169653	0.352952	0.0220009
MA0115.1_NR1H2::RXRA	AIM2hi Memory B	-0.00058681	0.0218214	-0.00812903	-0.0078429	0.0221715	0.0212086	-0.00293583	-0.0113712	-0.00780867	0.0281537	0.383135	0.0725493	0.633368	0.00967535	0.108824	0.633368	0.0290261
MA0771.1_HSF4	AIM2hi Memory B	-0.017716	0.00662112	0.00859152	0.00842915	0.012837	-0.00425673	-0.000922988	0.00299225	0.021467	0.0316046	0.383135	0.0377713	0.0148849	0.741942	0.056657	0.0446547	0.741942
MA0649.1_HEY2	AIM2hi Memory B	-0.00797789	-0.0195339	0.00387458	0.00417763	-0.0273898	-0.00578601	0.0128732	-0.00230417	0.00508402	0.0332812	0.383135	0.503515	0.0746771	0.0186718	0.503515	0.112016	0.0560155
MA0048.2_NHLH1	AIM2hi Memory B	0.0171998	0.00527295	-0.00214907	0.005464	0.00918728	-0.00157715	-0.000740588	-0.0122836	0.00873557	0.0358021	0.383135	0.148861	0.0129414	0.279284	0.223291	0.0388242	0.279284
MA0073.1_RREB1	AIM2hi Memory B	-0.00695553	0.00390261	-0.00748664	-0.00337934	0.00418612	0.00340649	-0.00701899	-0.00863705	-0.00645627	0.0359189	0.383135	0.00670628	0.706491	0.0738512	0.0201188	0.706491	0.110777
MA0501.1_MAF::NFE2	AIM2hi Memory B	0.0122766	0.0310006	-0.00762052	0.0234792	0.03131	0.0304591	-0.0214667	-0.00572259	-0.000603996	0.0421835	0.385162	0.275063	0.0832321	0.0304753	0.275063	0.124848	0.0914259
MA0139.1_CTCF	AIM2hi Memory B	0.00947366	-0.000787172	0.0338725	-0.00501475	0.00688744	-0.0142177	0.015878	0.0249174	0.0563163	0.0438287	0.385162	0.245278	0.11374	0.0270429	0.245278	0.17061	0.0811287
MA0645.1_ETV6	AIM2hi Memory B	-0.000225316	-0.0100154	-0.0136382	-0.0021728	-0.0170951	0.00237413	-0.00898407	-0.0124132	-0.0181702	0.0443933	0.385162	0.418052	0.0112259	0.221311	0.418052	0.0336777	0.331966
MA0691.1_TFAP4	AIM2hi Memory B	0.0138828	0.00541008	-0.0143845	0.00754962	0.0152636	-0.0118336	-0.0229988	-0.0195776	-0.00258297	0.0481303	0.385162	0.647156	0.0148849	0.144771	0.647156	0.0446547	0.217157
MA0074.1_RXRA::VDR	AIM2hi Memory B	0.00633539	0.0243274	-0.00176635	-0.00744706	0.0274545	0.0188549	-0.00529304	-0.000294894	-0.00113192	0.0481453	0.385162	0.0844846	0.258595	0.0304753	0.126727	0.258595	0.0914259
MA0657.1_KLF13	AIM2hi Memory B	-0.00367286	0.00665569	0.014538	-0.00168674	0.00467805	0.0101166	0.0178412	0.00521742	0.02321	0.0567947	0.402357	0.459672	0.00722664	0.480433	0.480433	0.0216799	0.480433
MA0698.1_ZBTB18	AIM2hi Memory B	0.00963566	0.0122169	-0.00473359	-0.000247105	0.00722056	0.0209604	-0.00454195	0.00179989	-0.0124837	0.0572723	0.402357	0.860259	0.11374	0.0239495	0.860259	0.17061	0.0718485
MA0112.3_ESR1	AIM2hi Memory B	-0.00904395	0.0121536	0.00109817	-0.00971082	0.00465944	0.0252684	0.00354577	0.00107193	-0.000502947	0.0578389	0.402357	0.031734	0.152437	0.158182	0.095202	0.158182	0.158182
MA0655.1_JDP2	AIM2hi Memory B	-0.000465277	0.0492379	-0.0182419	0.0533941	0.0643701	0.0227566	-0.0160224	-0.0275819	-0.00882473	0.0637409	0.409515	0.113102	0.900109	0.0211678	0.169653	0.900109	0.0635033
MA0646.1_GCM1	AIM2hi Memory B	-0.0125434	0.0180157	-0.00152803	0.00344823	0.0309189	-0.00456507	7.74016e-05	0.00614856	-0.0115543	0.0663856	0.409515	0.0221037	0.238029	0.187795	0.0663111	0.238029	0.238029
MA0665.1_MSC	AIM2hi Memory B	0.00483367	0.0106716	-0.0115591	0.0121478	0.0165404	0.000401163	-0.017186	-0.0133915	-0.00567019	0.0665462	0.409515	0.698535	0.0832321	0.0431003	0.698535	0.124848	0.124848
MA0071.1_RORA	AIM2hi Memory B	-0.0179084	0.00816825	-0.00713365	0.00314892	0.00550543	0.0128282	0.016139	-0.0243728	-0.00253645	0.0728121	0.413938	0.0221037	0.238029	0.221311	0.0663111	0.238029	0.238029
MA0088.2_ZNF143	AIM2hi Memory B	-0.00190588	-0.00794037	0.00859425	-0.000860611	-0.013941	0.00256069	0.00900429	0.0116332	0.0047754	0.0731465	0.413938	0.597406	0.0532274	0.0738512	0.597406	0.110777	0.110777
MA0685.1_SP4	AIM2hi Memory B	-0.00583973	0.0013329	0.00438275	0.000587425	0.00362706	-0.00268188	0.00535223	-0.0011492	0.0101904	0.0772004	0.413938	0.169706	0.0289535	0.423892	0.254559	0.0868604	0.423892
MA0763.1_ETV3	AIM2hi Memory B	-0.0137254	-0.00690011	0.00386989	-0.00904357	-0.0110417	0.00034774	0.0165567	0.00311554	-0.00370793	0.0797399	0.413938	0.503515	0.0328502	0.172514	0.503515	0.0985505	0.258771
MA0825.1_MNT	AIM2hi Memory B	-0.011169	-0.00434064	0.0144718	0.00476226	-0.00821934	0.00244709	0.0280835	0.0152464	0.0044937	0.0802004	0.413938	0.307226	0.0371874	0.204052	0.307226	0.111562	0.306079
MA0031.1_FOXD1	AIM2hi Memory B	-0.0231058	-0.000309813	-0.00309649	-0.0175852	0.0149939	-0.0270913	0.0267659	-0.0149373	-0.00919045	0.0871787	0.42065	0.062031	0.0925644	0.300721	0.138847	0.138847	0.300721
MA0157.2_FOXO3	AIM2hi Memory B	-0.0231058	-0.000309813	-0.00309649	-0.0175852	0.0149939	-0.0270913	0.0267659	-0.0149373	-0.00919045	0.0871787	0.42065	0.062031	0.0925644	0.300721	0.138847	0.138847	0.300721
MA0758.1_E2F7	AIM2hi Memory B	0.00304805	-0.0117387	0.0126417	-0.00498282	-0.0030007	-0.0270302	0.0246317	0.0152193	0.00164112	0.0893881	0.42065	0.217832	0.407411	0.0342754	0.326748	0.407411	0.102826
MA0144.2_STAT3	AIM2hi Memory B	-0.00183067	0.00374411	0.00465021	-0.0090298	0.00732225	-0.00251765	0.00893727	0.00949029	-0.00385459	0.0959334	0.430386	0.378738	0.0223399	0.451663	0.451663	0.0670197	0.451663
MA0797.1_TGIF2	AIM2hi Memory B	0.0193303	-0.0104014	-0.00794347	0.00218405	-0.00518947	-0.0195222	-0.0276124	-0.0057455	0.00260488	0.0980695	0.430386	0.113102	0.0371874	0.962481	0.169653	0.111562	0.962481
MA0785.1_POU2F1	AIM2hi Memory B	0.00064417	0.00605415	-0.00751051	0.00825293	0.00807522	0.00251726	0.00735909	-0.00777444	-0.0171157	0.10102	0.430386
MA0058.3_MAX	AIM2hi Memory B	-0.00750037	-0.0014556	0.0104687	-0.00233356	0.000250818	-0.00444182	0.0256705	0.0162519	-0.00641299	0.106638	0.430386
MA0760.1_ERF	AIM2hi Memory B	-0.0104231	0.000732611	-0.00491661	-0.00497915	-0.00133253	0.00434661	0.0132645	-0.00668859	-0.0149701	0.107464	0.430386
MA0848.1_FOXO4	AIM2hi Memory B	-0.0120336	0.0014494	-0.00686432	-0.00849536	0.0150122	-0.0222856	0.0163539	-0.00747049	-0.0216359	0.108759	0.430386
MA0823.1_HEY1	AIM2hi Memory B	-0.0106784	-0.0200013	0.000976809	0.00270325	-0.0305571	-0.00152864	0.00706557	-0.00907118	0.00864029	0.111847	0.430386
MA0488.1_JUN	AIM2hi Memory B	0.00322806	-0.01297	0.00260974	0.0194327	-0.0123237	-0.0141009	0.00708262	0.000334444	0.00228232	0.115183	0.430386
MA0258.2_ESR2	AIM2hi Memory B	0.00600122	0.00618732	-0.0100344	-0.000721682	0.00533453	0.0076797	-0.00775563	-0.0139123	-0.00702943	0.115666	0.430386
MA0076.2_ELK4	AIM2hi Memory B	-0.0137547	-0.00523336	-0.000654797	-0.010987	-0.00596691	-0.00394966	0.0144396	-0.00391157	-0.00691813	0.122106	0.4439
MA0719.1_RHOXF1	AIM2hi Memory B	-0.0118545	-0.0167627	0.00663732	0.00462175	-0.0177142	-0.0150975	0.0241862	0.0204137	-0.0211344	0.128191	0.4439
MA0475.2_FLI1	AIM2hi Memory B	-0.0143531	0.00105043	-0.00353381	-0.00866874	0.0047065	-0.00534769	0.0199488	-0.00507893	-0.0173862	0.130423	0.4439
MA0899.1_HOXA10	AIM2hi Memory B	-0.00283062	-0.00681036	0.0128753	-0.00408758	-0.00704259	-0.00640395	0.0110219	0.00815171	0.0196216	0.13137	0.4439
MA0777.1_MYBL2	AIM2hi Memory B	-0.0181769	0.0124054	0.012143	-0.016656	0.0302865	-0.0188864	-0.00142218	0.0129519	0.0202427	0.13317	0.4439
MA0628.1_POU6F1	AIM2hi Memory B	0.0384088	-0.00415907	-0.00143015	-0.0137119	-0.0175889	0.0193432	-0.0432125	-0.0133146	0.0402899	0.137054	0.447524
MA0478.1_FOSL2	AIM2hi Memory B	-0.0103786	0.0487668	-0.014823	0.0502847	0.0542963	0.0390902	-0.0221004	-0.0172357	-0.0071566	0.149049	0.476958
MA0759.1_ELK3	AIM2hi Memory B	-0.00861428	-0.00204359	0.0073912	-0.00522504	-0.00515591	0.00340295	0.0233088	0.00268422	0.00227093	0.155122	0.486656
MA0731.1_BCL6B	AIM2hi Memory B	0.00416277	-0.0174449	-0.00356151	0.00722666	-0.0185161	-0.0155704	0.00872913	-0.00871948	-0.00573765	0.160616	0.487492
MA0796.1_TGIF1	AIM2hi Memory B	0.0108118	0.00596961	-0.00644057	0.00812115	0.0122929	-0.00509611	-0.0211359	-0.0118728	0.00969392	0.161482	0.487492
MA0690.1_TBX21	AIM2hi Memory B	-0.0161012	-2.21437e-05	-0.0180246	-0.00787825	-0.00816897	0.0142348	-0.013179	-0.0162408	-0.0233362	0.174638	0.517445
MA0862.1_GMEB2	AIM2hi Memory B	-0.0224023	-0.0155063	0.00299421	-0.0295269	-0.00580251	-0.0324879	-0.0243033	0.0240493	-0.00337169	0.178377	0.518914
MA0032.2_FOXC1	AIM2hi Memory B	-0.00857539	0.0135259	0.00257826	-0.00299452	0.0352781	-0.0245404	0.013516	-0.000381679	-0.00126033	0.186766	0.533617
MA0597.1_THAP1	AIM2hi Memory B	-0.00128774	0.00505331	-0.0040895	-0.0034841	0.00240826	0.00968214	-0.00150813	-0.00083702	-0.00960496	0.198808	0.558057
MA0671.1_NFIX	AIM2hi Memory B	0.00940824	-0.00873187	-0.0027254	0.015269	-0.00338714	-0.0180851	-0.011249	-0.00767669	0.00873352	0.203224	0.560618
MA0641.1_ELF4	AIM2hi Memory B	-0.0106989	-0.00864765	0.00141194	-0.00700507	-0.0189183	0.00932608	0.00785849	0.00317273	-0.00494001	0.210339	0.56498
MA0464.2_BHLHE40	AIM2hi Memory B	-0.00793363	-0.00062217	0.00853994	0.00119465	0.00836734	-0.0163538	0.00615176	0.015132	0.00244132	0.211868	0.56498
MA0738.1_HIC2	AIM2hi Memory B	-0.0137984	-0.00291671	-0.0066949	0.00271787	-0.00703996	0.00429898	-0.00579132	-0.0098342	-0.00363477	0.224078	0.587744
MA0070.1_PBX1	AIM2hi Memory B	-0.00496609	0.0147938	-0.00672563	0.00516284	0.0297412	-0.0113641	-0.0203189	0.00266183	-0.00861547	0.230476	0.594778
MA0596.1_SREBF2	AIM2hi Memory B	0.0015378	0.0147099	-0.00799986	0.00904844	0.00318861	0.0348723	0.00199673	-0.00972574	-0.0126507	0.236745	0.600703
MA0661.1_MEOX1	AIM2hi Memory B	0.00285719	-0.00644533	0.0209849	-0.000241245	-0.00990569	-0.000389712	0.0133359	0.0069514	0.0424567	0.240281	0.600703
MA0841.1_NFE2	AIM2hi Memory B	-0.00691863	0.0453221	-0.00758005	0.045865	0.0553273	0.0278131	-0.000718239	-0.0121687	-0.00680118	0.249208	0.613434
MA0800.1_EOMES	AIM2hi Memory B	-0.0105714	-0.0109264	-0.0319618	-0.00352343	-0.013807	-0.00588525	-0.00884986	-0.0311828	-0.0482785	0.260915	0.625363
MA0647.1_GRHL1	AIM2hi Memory B	-0.0197964	-0.00291025	-0.00237055	0.00654494	-0.00762317	0.00533735	-0.0173614	0.0139262	-0.0113895	0.266118	0.625363
MA0668.1_NEUROD2	AIM2hi Memory B	0.00927935	0.0440591	0.00875903	0.0243383	0.0613466	0.0138061	-0.000246491	0.00463167	0.019578	0.267796	0.625363
MA0083.3_SRF	AIM2hi Memory B	0.000850011	0.0192738	-0.0115127	0.00639009	0.0263567	0.0068786	-0.00377135	-0.0194263	-0.00744096	0.269688	0.625363
MA0476.1_FOS	AIM2hi Memory B	-0.00677664	0.0430689	-0.0106471	0.0486019	0.0488284	0.0329898	-0.0262775	-0.00986287	-0.00114193	0.28387	0.638934
MA0808.1_TEAD3	AIM2hi Memory B	0.00828892	-0.0070855	0.00110171	-0.016691	-0.00308272	-0.0140904	-0.0120639	0.0113316	-0.00205615	0.286066	0.638934
MA0664.1_MLXIPL	AIM2hi Memory B	0.000765605	-0.00361966	0.0133578	-0.00334252	0.000954065	-0.0116237	0.00331301	0.024294	0.00729535	0.289511	0.638934
MA0660.1_MEF2B	AIM2hi Memory B	-0.0180512	0.000667206	-0.0105403	0.00123726	0.00605866	-0.00876784	3.70353e-05	-0.0146701	-0.0127736	0.294814	0.638934
MA0599.1_KLF5	AIM2hi Memory B	-0.00245653	0.00246578	0.000581952	-0.0028835	0.00614264	-0.00396871	0.00219667	-0.000630849	0.000920406	0.295507	0.638934
MA0805.1_TBX1	AIM2hi Memory B	-0.00305847	-0.00247576	-0.020577	0.0114999	-0.0198958	0.0280093	-0.00462334	-0.0079843	-0.0459043	0.303955	0.642043
MA0504.1_NR2C2	AIM2hi Memory B	0.000566003	0.0100976	0.000532968	-0.00232146	0.0106226	0.00917871	0.00215113	-0.00522804	0.00617537	0.30497	0.642043
MA0595.1_SREBF1	AIM2hi Memory B	-0.000242966	0.00163913	-0.0151973	0.0113597	0.000706474	0.00327128	-0.00878174	-0.00377878	-0.032796	0.32867	0.667945
MA0834.1_ATF7	AIM2hi Memory B	-0.00265486	-0.00633119	0.00569525	0.00356034	0.00443658	-0.0251748	0.0114443	-0.00152039	0.0102808	0.329877	0.667945
MA0527.1_ZBTB33	AIM2hi Memory B	-0.00696262	-0.0109934	-0.000903091	-0.00292161	-0.0156657	-0.00281692	0.0103271	-0.00249717	-0.00653011	0.330964	0.667945
MA0819.1_CLOCK	AIM2hi Memory B	0.00681925	-0.0155917	0.0014733	-0.00900043	-0.0121205	-0.0216663	0.0224214	-0.00389126	-0.00623344	0.333973	0.667945
MA0845.1_FOXB1	AIM2hi Memory B	-0.0129236	0.0156511	-0.00110254	2.39643e-05	0.0317418	-0.0125077	0.00881168	0.00707834	-0.0172564	0.351815	0.673096
MA0472.2_EGR2	AIM2hi Memory B	0.000103589	0.00225316	-0.00655878	0.00153317	0.0051818	-0.00287196	-0.000216425	-0.00759081	-0.00958299	0.358222	0.673096
MA0101.1_REL	AIM2hi Memory B	-0.0207846	0.0189184	-0.012532	-0.000127592	0.023856	0.0102776	-0.0154262	-0.00448092	-0.0199955	0.362397	0.673096
MA0865.1_E2F8	AIM2hi Memory B	0.00218332	0.020243	0.00750249	0.00141951	0.0259543	0.0102482	0.00812698	-0.000993559	0.0169982	0.367062	0.673096
MA0137.3_STAT1	AIM2hi Memory B	-0.00185565	0.00317772	0.00239583	-0.00496444	0.00679693	-0.00315591	0.00437627	0.00152474	0.00209181	0.368272	0.673096
MA0107.1_RELA	AIM2hi Memory B	-0.019484	0.0195559	-0.00688226	0.0019253	0.0225079	0.0143899	-0.0137305	0.00292112	-0.013754	0.369972	0.673096
MA0507.1_POU2F2	AIM2hi Memory B	0.00626997	0.00735429	-0.00959949	0.00474689	0.00264362	0.015598	0.0016044	-0.0141035	-0.011814	0.379754	0.673096
MA0844.1_XBP1	AIM2hi Memory B	0.00859712	-0.00350581	-0.00196622	-0.00510571	0.00328005	-0.0153811	0.0126007	0.00607856	-0.0210631	0.380478	0.673096
MA0843.1_TEF	AIM2hi Memory B	0.00569198	-0.0098566	0.0170252	0.0331563	-0.0232517	0.0135849	0.00936612	0.0177983	0.0212293	0.383537	0.673096
MA0637.1_CENPB	AIM2hi Memory B	-0.0137059	0.0109736	0.00159167	-0.00695888	0.0117997	0.00952783	0.00967035	0.00735731	-0.0105207	0.38688	0.673096
MA0159.1_RARA::RXRA	AIM2hi Memory B	-0.00243917	0.00199283	-0.00231837	0.000705061	-0.00265943	0.0101343	-0.000775108	-0.0161673	0.0128098	0.392556	0.673096
MA0639.1_DBP	AIM2hi Memory B	0.00336098	-0.0108309	0.014704	0.028297	-0.013391	-0.00635062	0.00785857	-0.00265107	0.0395152	0.392896	0.673096
MA0694.1_ZBTB7B	AIM2hi Memory B	-0.0105208	-0.00186956	0.000690894	-0.00246292	4.86885e-05	-0.00522648	0.0223121	0.00625546	-0.0202153	0.394321	0.673096
MA0741.1_KLF16	AIM2hi Memory B	-0.00141638	0.00210477	0.00243562	-0.00312421	0.00412707	-0.00143425	0.00485091	0.00102642	0.0024695	0.395444	0.673096
MA0855.1_RXRB	AIM2hi Memory B	0.000800738	0.0153265	-0.00233711	-0.00420334	0.0154553	0.0151012	0.00779137	-0.00535486	-0.00556873	0.410326	0.691076
MA0754.1_CUX1	AIM2hi Memory B	-0.0192348	0.00748173	0.00410561	-0.014873	-0.011108	0.0400137	-0.0243722	0.00548904	0.0214768	0.415136	0.691894
MA0863.1_MTF1	AIM2hi Memory B	-0.00385827	0.00734913	0.00992824	0.00263642	0.00144829	0.0176756	0.00879936	0.00229515	0.0195861	0.424749	0.698269
MA0795.1_SMAD3	AIM2hi Memory B	-0.0084018	-0.00118549	0.0106555	-0.0101714	0.00717915	-0.0158236	-0.00420028	0.0106889	0.0205204	0.431477	0.698269
MA0625.1_NFATC3	AIM2hi Memory B	-0.00815996	-0.00879258	0.00745762	-0.00316479	-0.00850848	-0.00928976	0.0123836	-0.00100809	0.0140503	0.435267	0.698269
MA0050.2_IRF1	AIM2hi Memory B	-0.0052982	-0.000615753	-0.00283495	-0.00518914	-0.00550913	0.00794766	0.00399539	-0.0108323	0.00194175	0.436853	0.698269
MA0861.1_TP73	AIM2hi Memory B	-0.00608399	-0.0111865	-0.00242163	-0.00155865	-0.0241374	0.0114777	-0.000271123	0.00269034	-0.00981927	0.445681	0.698269
MA0768.1_LEF1	AIM2hi Memory B	0.00455561	-0.00354995	0.000376491	-0.000977915	-0.00760592	0.00354801	0.0112926	0.00334053	-0.010359	0.44909	0.698269
MA0903.1_HOXB3	AIM2hi Memory B	0.00350889	-0.00397938	0.0122402	0.00534962	-0.010687	0.00775903	0.00957533	-0.00688377	0.036328	0.449511	0.698269
MA0699.1_LBX2	AIM2hi Memory B	-0.00106755	0.014029	-0.00471473	0.000943278	0.0118169	0.0179002	-0.00288267	-0.0050719	-0.00551941	0.45585	0.701307
MA0804.1_TBX19	AIM2hi Memory B	0.00455743	0.00702321	-0.0162363	0.00662609	-0.00787139	0.0330888	-0.037095	0.00591999	-0.0281796	0.477777	0.728041
MA0732.1_EGR3	AIM2hi Memory B	-2.3635e-05	0.000299759	-0.00172754	-0.0040658	0.000670317	-0.000348716	0.0081757	-0.00319779	-0.00661441	0.489084	0.738241
MA0776.1_MYBL1	AIM2hi Memory B	-0.000786134	0.0181971	6.78818e-05	0.00269219	0.0176268	0.0191953	0.0124378	-0.0334042	0.030872	0.499541	0.746977
MA0894.1_HESX1	AIM2hi Memory B	0.0178662	-0.0055522	0.00370658	0.00580079	-0.00708625	-0.0028676	-0.00742588	0.00833118	0.00573286	0.507113	0.747117
MA0752.1_ZNF410	AIM2hi Memory B	-0.00928208	0.00248017	-0.00187159	-0.0118336	0.0083506	-0.00779306	-0.0110429	-0.00300881	0.00556941	0.508973	0.747117
MA0152.1_NFATC2	AIM2hi Memory B	0.00101933	-0.00174592	0.00519257	-0.0202324	-0.00399213	0.00218496	0.00583537	0.00595301	0.00387685	0.515003	0.747276
MA0727.1_NR3C2	AIM2hi Memory B	-0.0124849	-0.0151101	0.000396539	-0.0274575	-0.00834551	-0.0269481	0.00527927	-0.0153642	0.0155289	0.526053	0.747276
MA0024.3_E2F1	AIM2hi Memory B	-0.00610236	-0.0131422	-0.000175994	0.00888301	-0.0103784	-0.017979	0.00179363	0.014921	-0.0191022	0.526053	0.747276
MA0663.1_MLX	AIM2hi Memory B	-0.0015246	-0.00114738	0.0130991	-0.001285	0.00708248	-0.0155496	0.00353037	0.022068	0.00901471	0.527764	0.747276
MA0130.1_ZNF354C	AIM2hi Memory B	0.000372735	-0.000585028	0.00323444	-0.00270112	-0.00049571	-0.000741336	0.00568171	0.0120895	-0.00872802	0.539285	0.756892
MA0692.1_TFEB	AIM2hi Memory B	-0.00530167	-0.00472139	0.00478598	0.00531085	0.00402792	-0.0200327	0.00933479	0.0151403	-0.0103266	0.545514	0.758976
MA0717.1_RAX2	AIM2hi Memory B	-0.000926163	0.0107051	-0.00560679	-0.0106043	0.0010324	0.0276323	-0.0133129	-0.0123823	0.00743541	0.550693	0.759577
MA0259.1_ARNT::HIF1A	AIM2hi Memory B	-0.0230881	-0.00824401	-0.00897592	0.00372392	-0.00902407	-0.00687891	0.00431297	-0.00299063	-0.024818	0.565687	0.77359
MA0773.1_MEF2D	AIM2hi Memory B	-0.0122954	0.000972692	-0.00940735	-0.00335098	0.00881777	-0.0127562	-0.00773854	-0.0160375	-0.00278476	0.577778	0.783428
MA0838.1_CEBPG	AIM2hi Memory B	-0.0116823	0.0117813	0.0155489	-0.0024734	0.00919293	0.0163109	0.0102008	0.0090864	0.0266539	0.587211	0.789527
MA0801.1_MGA	AIM2hi Memory B	-0.00822125	-0.00759199	-0.0193195	0.00461516	-0.0192846	0.01287	-0.00828284	-0.0207243	-0.0250384	0.609146	0.807113
MA0662.1_MIXL1	AIM2hi Memory B	0.00840295	-0.00035317	0.00669901	-0.0346205	-0.000376141	-0.000312972	0.000988848	0.00647382	0.0107685	0.61097	0.807113
MA0525.2_TP63	AIM2hi Memory B	0.00385841	-0.00232087	-0.00791718	0.0104475	0.00509563	-0.0152998	-0.00780618	-0.0229967	0.00960159	0.615424	0.807113
MA0098.3_ETS1	AIM2hi Memory B	-0.00666133	-0.00380326	-0.00113549	-0.00788251	-0.00331418	-0.00465915	0.0223009	-0.00643443	-0.0105776	0.625363	0.808405
MA0486.2_HSF1	AIM2hi Memory B	-0.00439866	0.00176989	0.00689185	0.0227321	0.000942854	0.00321721	0.00293319	-0.00355846	0.021723	0.628218	0.808405
MA0638.1_CREB3	AIM2hi Memory B	0.000855138	-0.00488317	0.00485787	8.11638e-05	-0.00408561	-0.00627889	0.0181323	0.00614033	-0.00548793	0.635385	0.808405
MA0636.1_BHLHE41	AIM2hi Memory B	-0.00587151	0.00103543	0.00666985	0.00201047	0.00352808	-0.00332671	0.00473361	0.00328983	0.011904	0.636619	0.808405
MA0046.2_HNF1A	AIM2hi Memory B	-0.010309	-0.0110834	0.00140028	-0.00327727	-0.0213477	0.00687909	-0.0192331	0.00749618	0.00804395	0.653715	0.816018
MA0511.2_RUNX2	AIM2hi Memory B	-0.00666422	-0.00155041	-0.0149879	0.00532821	-0.0112907	0.015495	0.00683445	-0.00931067	-0.0361596	0.664297	0.816018
MA0153.2_HNF1B	AIM2hi Memory B	-0.0135365	-0.00205814	-0.00443719	0.00548033	-0.00773563	0.00787747	-0.032565	0.0067768	0.00123173	0.665747	0.816018
MA0724.1_VENTX	AIM2hi Memory B	-0.00942908	-0.00549396	-0.0142975	0.0197229	-0.0113867	0.00481836	-0.0354258	-0.0252563	0.0125733	0.667197	0.816018
MA0513.1_SMAD2::SMAD3::SMAD4	AIM2hi Memory B	-0.000136974	-0.000449	-0.00598524	0.00443158	0.00173254	-0.0042667	-0.00361815	-0.00435759	-0.00946224	0.668115	0.816018
MA0770.1_HSF2	AIM2hi Memory B	-0.0048049	-0.00389569	0.0026653	0.0125991	-0.00527802	-0.0014766	0.00800563	0.000187439	0.00199591	0.711163	0.855327
MA0497.1_MEF2C	AIM2hi Memory B	-0.00642346	0.000848208	-0.00271775	-0.011622	0.00539653	-0.00711136	0.00469501	-0.00701169	-0.00265	0.716572	0.855327
MA0517.1_STAT1::STAT2	AIM2hi Memory B	-0.00649463	-0.00027216	-0.00194841	-0.00221638	-0.00541097	0.00872075	0.00507509	-0.00858686	0.00111411	0.722936	0.855327
MA0670.1_NFIA	AIM2hi Memory B	-0.00441775	0.000445609	-0.00793044	0.000807875	0.00364249	-0.00514893	-0.00827722	-0.00397005	-0.0123197	0.72853	0.855327
MA0778.1_NFKB2	AIM2hi Memory B	-0.00951077	0.0122362	-0.00943772	0.0117791	0.0200556	-0.00144765	-0.0127915	-0.00704976	-0.00998787	0.73102	0.855327
MA0160.1_NR4A2	AIM2hi Memory B	0.00593675	0.000918155	-0.00631965	0.00144457	-0.00978859	0.019655	-0.00266134	-0.0129862	-0.000980845	0.732374	0.855327
MA0729.1_RARA	AIM2hi Memory B	-0.00765011	-0.00470434	-0.00854883	-0.00915617	-0.00507325	-0.00405875	0.00872507	-0.0099147	-0.0184712	0.746004	0.862937
MA0837.1_CEBPE	AIM2hi Memory B	0.0120395	-0.00397775	0.0175743	-0.00299756	0.00672719	-0.0227114	-0.0109351	0.0157671	0.0386889	0.751171	0.862937
MA0466.2_CEBPB	AIM2hi Memory B	0.0119099	0.00555892	0.0201374	-0.00793202	0.0100931	-0.00237581	-0.00418225	0.0190707	0.0375949	0.755619	0.862937
MA0510.2_RFX5	AIM2hi Memory B	0.00138561	0.00445358	0.00766412	0.00806364	0.00552793	0.00257346	0.00830484	0.00225174	0.0135514	0.760464	0.862937
MA0138.2_REST	AIM2hi Memory B	0.00113578	0.00292681	0.00249382	0.0049316	-0.0054554	0.0175957	-0.00281558	0.00125358	0.00748038	0.774328	0.864836
MA0895.1_HMBOX1	AIM2hi Memory B	0.00394244	0.0101487	0.00929233	0.00377083	0.00515522	0.0188874	-0.0166512	0.0184132	0.0159471	0.782103	0.864836
MA0794.1_PROX1	AIM2hi Memory B	-0.000970341	0.00177504	0.0021838	-0.00188523	-0.00178343	0.00800237	0.00215216	-0.00341735	0.00873956	0.783359	0.864836
MA0666.1_MSX1	AIM2hi Memory B	-0.00195457	0.00957834	-0.000774018	0.00250706	0.010722	0.00757692	0.00937666	-0.0121747	0.00575962	0.789393	0.864836
MA0799.1_RFX4	AIM2hi Memory B	0.00307278	0.00664446	0.00604838	0.0122506	0.00492659	0.00965074	0.0105074	0.000119256	0.00999301	0.795838	0.864836
MA0059.1_MAX::MYC	AIM2hi Memory B	-0.000864277	0.00208473	0.00671019	0.00163511	-0.0105464	0.0241892	0.0087557	0.019129	-0.00914212	0.801239	0.864836
MA0786.1_POU3F1	AIM2hi Memory B	0.00338679	0.00296744	-0.00646344	0.00768057	0.00106523	0.00629632	0.0172598	-0.0153491	-0.0119124	0.803776	0.864836
MA0733.1_EGR4	AIM2hi Memory B	-0.0011058	-0.00428406	-0.0011072	0.00107174	-0.00328322	-0.00603553	0.00406773	-0.0029638	-0.00239113	0.805378	0.864836
MA0106.3_TP53	AIM2hi Memory B	-0.00293539	0.00620018	-0.00513706	-0.00392961	-0.00100367	0.0188069	-0.00995656	0.00163393	-0.00982354	0.825273	0.880291
MA0131.2_HINFP	AIM2hi Memory B	-0.000613707	0.000276946	0.00202202	-0.00120409	9.94029e-05	0.000587647	0.007764	0.00429481	-0.00445756	0.839853	0.88991
MA0523.1_TCF7L2	AIM2hi Memory B	0.000883916	0.0028429	0.00302523	-0.00281391	0.00755387	-0.00540131	0.0087484	0.000143691	0.00257159	0.853247	0.898154
MA0600.2_RFX2	AIM2hi Memory B	0.00144219	0.00651871	0.00444123	0.0149062	0.00439981	0.0102268	0.00140962	-0.00474368	0.017178	0.872412	0.912326
MA0163.1_PLAG1	AIM2hi Memory B	-0.000331218	-0.00254614	-0.00139458	-0.00690464	-0.00178549	-0.00387729	0.00166948	-0.00484379	0.00058678	0.884399	0.918856
MA0077.1_SOX9	AIM2hi Memory B	0.0090597	0.00157873	-0.000602222	-0.000306337	-0.00416726	0.0116342	0.0159099	-0.0085452	-0.00234352	0.900725	0.929781
MA0914.1_ISL2	AIM2hi Memory B	0.000924539	-0.00523274	-0.00170515	0.00388988	-0.003619	-0.00805679	-0.0160514	-0.00715541	0.0142176	0.907441	0.930708
MA0762.1_ETV2	AIM2hi Memory B	-0.0111649	-0.0118132	-0.0110388	-0.00326924	-0.0197965	0.00215752	0.00891627	-0.0101815	-0.0253423	0.919753	0.937328
MA0105.4_NFKB1	AIM2hi Memory B	-0.012845	0.0024532	-0.0111346	0.00911153	0.0136456	-0.0171334	-0.0169486	-0.00203726	-0.0178721	0.925827	0.937546
MA0790.1_POU4F1	AIM2hi Memory B	0.000539921	-0.00866297	-0.00567179	0.004558	-0.0114169	-0.00384365	-0.0199327	-0.00699531	0.00537956	0.965372	0.971443
MA0479.1_FOXH1	AIM2hi Memory B	0.00577807	-0.000616291	0.00288669	0.0101404	0.00753564	-0.0148822	0.0178668	-0.000995548	-0.0025708	0.982016	0.982016
MA0777.1_MYBL2	AXL+ SIGLEX6+ DC	-0.085976	0.103387	0.0452914	-0.0232349		0.103387	0.00621483	-0.00999359	0.234014	0.0226779	0.723474	0.133333	0.015873	0.380952	0.2	0.047619	0.380952
MA0595.1_SREBF1	AXL+ SIGLEX6+ DC	-0.0241046	-0.0380194	0.0358046	0.00971881		-0.0380194	0.0161756	0.0473485	0.0519748	0.0227295	0.723474	0.8	0.015873	0.0952381	0.8	0.047619	0.142857
MA0131.2_HINFP	AXL+ SIGLEX6+ DC	-0.0188311	0.0221433	0.0103834	-0.0152707		0.0221433	0.00249072	0.0136317	0.0196723	0.0272617	0.723474	0.133333	0.031746	0.190476	0.190476	0.0952381	0.190476
MA0106.3_TP53	AXL+ SIGLEX6+ DC	0.0289632	0.0246791	-0.0495849	0.052712		0.0246791	-0.0425613	-0.0643703	-0.0340615	0.0346879	0.723474	0.8	0.015873	0.190476	0.8	0.047619	0.285714
MA0138.2_REST	AXL+ SIGLEX6+ DC	-0.0133497	0.00853724	0.0251618	-0.063839		0.00853724	0.00224844	0.0488254	0.0236614	0.0445402	0.723474	0.133333	0.031746	0.571429	0.2	0.0952381	0.571429
MA0115.1_NR1H2::RXRA	AXL+ SIGLEX6+ DC	-0.000516187	-0.0225697	0.0397336	-0.00342954		-0.0225697	0.0378922	0.0538412	0.0152013	0.0469303	0.723474	0.533333	0.0634921	0.0952381	0.533333	0.142857	0.142857
MA0741.1_KLF16	AXL+ SIGLEX6+ DC	3.68867e-05	0.00954731	-0.0079239	-0.00452929		0.00954731	-0.00498072	-0.00774078	-0.0141765	0.0525782	0.723474	0.266667	0.111111	0.0952381	0.266667	0.166667	0.166667
MA0105.4_NFKB1	AXL+ SIGLEX6+ DC	-0.0125383	-0.0158638	0.0426271	-0.0368537		-0.0158638	0.047548	0.0562135	0.00561251	0.0562881	0.723474	1	0.015873	0.380952	1	0.047619	0.571429
MA0801.1_MGA	AXL+ SIGLEX6+ DC	0.0122066	-0.0456201	0.00841618	0.0376187		-0.0456201	0.0154292	-0.00275507	0.0167326	0.0759809	0.723474	0.133333	0.412698	0.0952381	0.2	0.412698	0.2
MA0778.1_NFKB2	AXL+ SIGLEX6+ DC	-0.0220139	-0.00803943	0.0366956	-0.0295763		-0.00803943	0.0400608	0.0602981	-0.0172396	0.0876774	0.723474	0.8	0.0634921	0.190476	0.8	0.190476	0.285714
MA0076.2_ELK4	AXL+ SIGLEX6+ DC	0.00259162	0.0190543	-0.0118012	-0.0175743		0.0190543	-0.0101284	-0.00595346	-0.0268421	0.0911312	0.723474	0.533333	0.190476	0.0952381	0.533333	0.285714	0.285714
MA0596.1_SREBF2	AXL+ SIGLEX6+ DC	-0.00542517	-0.0335296	0.0358071	0.00553667		-0.0335296	0.00199898	0.0591821	0.0566734	0.0911312	0.723474	0.533333	0.190476	0.0952381	0.533333	0.285714	0.285714
MA0638.1_CREB3	AXL+ SIGLEX6+ DC	-0.024066	0.0553663	-0.0162199	0.0306442		0.0553663	-0.00165152	-0.0168048	-0.0441867	0.097119	0.723474	0.133333	0.730159	0.0952381	0.2	0.730159	0.2
MA0790.1_POU4F1	AXL+ SIGLEX6+ DC	-0.0139935	0.0123341	0.0258093	-0.0555465		0.0123341	0.0110754	0.0119752	0.0829454	0.0995776	0.723474	0.533333	0.031746	0.857143	0.8	0.0952381	0.857143
MA0506.1_NRF1	AXL+ SIGLEX6+ DC	-0.0214533	0.017536	0.0138953	-0.0276623		0.017536	0.00701807	0.0260968	0.00324691	0.11258	0.723474
MA0796.1_TGIF1	AXL+ SIGLEX6+ DC	0.0554499	-0.0189699	-0.0159529	0.0242227		-0.0189699	-0.0519021	0.0274718	-0.030904	0.11258	0.723474
MA0797.1_TGIF2	AXL+ SIGLEX6+ DC	0.0448262	-0.00820973	-0.0163497	0.00446539		-0.00820973	-0.0400924	0.0187738	-0.0391114	0.115168	0.723474
MA0834.1_ATF7	AXL+ SIGLEX6+ DC	-0.031773	0.0386236	0.0366356	-0.0140774		0.0386236	-0.0101904	0.0823925	0.038774	0.115168	0.723474
MA0685.1_SP4	AXL+ SIGLEX6+ DC	-0.000144884	0.017158	-0.0102935	-0.0138129		0.017158	0.000418435	-0.0188141	-0.014676	0.119433	0.723474
MA0137.3_STAT1	AXL+ SIGLEX6+ DC	-0.0222735	0.00165412	0.0115599	-0.0330539		0.00165412	0.0123703	0.0134363	0.00618644	0.129321	0.723474
MA0899.1_HOXA10	AXL+ SIGLEX6+ DC	-0.00390524	0.0283713	-0.00544072	0.000136049		0.0283713	0.000479268	-0.0160897	0.00401724	0.149569	0.723474
MA0645.1_ETV6	AXL+ SIGLEX6+ DC	0.0113142	-0.00454136	-0.0109821	0.0129208		-0.00454136	0.00376058	-0.020962	-0.0205075	0.163803	0.723474
MA0665.1_MSC	AXL+ SIGLEX6+ DC	0.0471891	-0.0266476	-0.00985616	0.00716199		-0.0266476	-0.031199	0.0305912	-0.0480653	0.167568	0.723474
MA0698.1_ZBTB18	AXL+ SIGLEX6+ DC	0.0509167	-0.0251248	-0.00916011	-0.0661314		-0.0251248	-0.0301125	0.0259763	-0.0375282	0.167568	0.723474
MA0863.1_MTF1	AXL+ SIGLEX6+ DC	0.0228323	-0.0109134	-0.00889554	-0.017204		-0.0109134	-0.0271622	0.0468492	-0.0838517	0.167568	0.723474
MA0759.1_ELK3	AXL+ SIGLEX6+ DC	-0.0170582	0.0277702	-0.00207501	-0.0121959		0.0277702	-0.00249163	-0.018498	0.0316042	0.188162	0.723474
MA0895.1_HMBOX1	AXL+ SIGLEX6+ DC	-0.0291771	0.0328363	0.00197796	0.0647611		0.0328363	0.0470955	-0.0411559	-0.00198941	0.188162	0.723474
MA0095.2_YY1	AXL+ SIGLEX6+ DC	-0.0189078	0.0205708	0.0296293	-0.0262174		0.0205708	-0.0156915	0.0298707	0.119788	0.19513	0.723474
MA0600.2_RFX2	AXL+ SIGLEX6+ DC	-0.0384084	0.0522877	0.0119442	0.0689241		0.0522877	-0.00515442	0.0524378	-0.0348458	0.19513	0.723474
MA0510.2_RFX5	AXL+ SIGLEX6+ DC	-0.0299796	0.05464	0.0133038	0.0356147		0.05464	-0.0179558	0.0448597	0.0127112	0.205601	0.723474
MA0637.1_CENPB	AXL+ SIGLEX6+ DC	-0.0241245	0.0196204	-0.036025	0.0169739		0.0196204	-0.00268708	-0.0746896	-0.0253716	0.216142	0.723474
MA0760.1_ERF	AXL+ SIGLEX6+ DC	-0.016537	0.030075	-0.00446287	0.0221603		0.030075	-0.0212903	-0.000666218	0.0215987	0.216142	0.723474
MA0028.2_ELK1	AXL+ SIGLEX6+ DC	-0.0185201	0.0290065	0.00348819	-0.0324329		0.0290065	-0.00148676	0.000233144	0.0199482	0.220609	0.723474
MA0152.1_NFATC2	AXL+ SIGLEX6+ DC	-0.00732192	0.000806872	0.0158346	-0.00482241		0.000806872	0.00074932	0.0320297	0.0136151	0.226194	0.723474
MA0804.1_TBX19	AXL+ SIGLEX6+ DC	0.00202546	0.035128	-0.0188572	-0.0116887		0.035128	0.0164464	-0.0592645	-0.00864975	0.235639	0.723474
MA0841.1_NFE2	AXL+ SIGLEX6+ DC	-0.0387356	0.0904525	-0.0222039	0.054532		0.0904525	0.0168109	-0.0515422	-0.0415571	0.238332	0.723474
MA0597.1_THAP1	AXL+ SIGLEX6+ DC	0.0212737	-0.0258979	-0.0049627	-0.0108335		-0.0258979	0.00315965	0.0098356	-0.050804	0.252266	0.723474
MA0475.2_FLI1	AXL+ SIGLEX6+ DC	-0.0151588	0.0218066	4.40401e-05	-0.0138641		0.0218066	-0.00707732	-0.000605917	0.0155867	0.252266	0.723474
MA0752.1_ZNF410	AXL+ SIGLEX6+ DC	0.0261999	-0.0477035	0.0210894	0.0218168		-0.0477035	0.0110838	0.0314785	0.0203223	0.252266	0.723474
MA0844.1_XBP1	AXL+ SIGLEX6+ DC	-0.0198285	0.0385101	0.0165603	0.0520679		0.0385101	0.00243239	0.0471394	-0.0163419	0.252266	0.723474
MA0527.1_ZBTB33	AXL+ SIGLEX6+ DC	-0.00825452	0.0251173	0.014394	0.00681188		0.0251173	0.00698352	-0.0126218	0.0832465	0.290438	0.723474
MA0763.1_ETV3	AXL+ SIGLEX6+ DC	-0.0161628	0.0217487	-0.002477	-0.0248463		0.0217487	0.00930424	-0.0206882	0.0103829	0.290438	0.723474
MA0655.1_JDP2	AXL+ SIGLEX6+ DC	-0.0446819	0.0715015	-0.0200792	0.0943555		0.0715015	0.00947548	-0.0301281	-0.0590908	0.293091	0.723474
MA0843.1_TEF	AXL+ SIGLEX6+ DC	-0.0363527	0.00449752	0.0288144	0.0637542		0.00449752	0.0953326	0.000949627	-0.0484927	0.302566	0.723474
MA0691.1_TFAP4	AXL+ SIGLEX6+ DC	0.0267466	0.0163642	-0.0153311	0.0306677		0.0163642	-0.0503181	0.0401518	-0.0563229	0.313059	0.723474
MA0113.3_NR3C1	AXL+ SIGLEX6+ DC	-0.024579	0.0245445	0.0101883	-0.0367985		0.0245445	0.00381364	0.00271521	0.0378839	0.313059	0.723474
MA0488.1_JUN	AXL+ SIGLEX6+ DC	-0.0252466	0.0200921	0.0322399	-0.00776301		0.0200921	0.0153917	0.0550446	0.0203267	0.313771	0.723474
MA0639.1_DBP	AXL+ SIGLEX6+ DC	-0.0327904	0.0320967	0.0223603	0.0892944		0.0320967	0.0392774	0.015472	0.00230284	0.313771	0.723474
MA0476.1_FOS	AXL+ SIGLEX6+ DC	-0.0154408	0.0656454	-0.0353954	0.0778009		0.0656454	-0.00394328	-0.0552975	-0.0584956	0.318079	0.723474
MA0478.1_FOSL2	AXL+ SIGLEX6+ DC	-0.0193438	0.0671934	-0.0368356	0.132692		0.0671934	-0.0265506	-0.0223627	-0.0863515	0.318079	0.723474
MA0771.1_HSF4	AXL+ SIGLEX6+ DC	0.0139518	-0.0247045	-0.0280453	0.107653		-0.0247045	-0.0221097	-0.0264822	-0.0430429	0.318079	0.723474
MA0819.1_CLOCK	AXL+ SIGLEX6+ DC	0.0430035	-0.0156985	-0.0120164	-0.0268088		-0.0156985	-0.0608246	0.00704185	0.0474834	0.367044	0.76104
MA0826.1_OLIG1	AXL+ SIGLEX6+ DC	-0.0126154	0.0384263	0.00744464	-0.0635271		0.0384263	-0.00587474	0.0189552	0.0110622	0.37293	0.76104
MA0107.1_RELA	AXL+ SIGLEX6+ DC	-0.0136857	-0.0119003	0.0235421	0.0159527		-0.0119003	0.0453603	0.0329453	-0.0389009	0.401976	0.76104
MA0754.1_CUX1	AXL+ SIGLEX6+ DC	0.0409843	0.0427601	-0.0689663	0.0398957		0.0427601	-0.063052	-0.0576011	-0.103525	0.401976	0.76104
MA0071.1_RORA	AXL+ SIGLEX6+ DC	0.0103956	0.0167384	-0.0149474	0.0323663		0.0167384	-0.0113691	0.00115486	-0.0543082	0.403807	0.76104
MA0259.1_ARNT::HIF1A	AXL+ SIGLEX6+ DC	-0.0391687	0.0240632	-0.0026194	0.114802		0.0240632	-0.0328027	0.00865264	0.0352031	0.403807	0.76104
MA0523.1_TCF7L2	AXL+ SIGLEX6+ DC	0.00078398	-0.0133949	0.0142403	-0.0239688		-0.0133949	0.0189403	0.00595937	0.0214022	0.403807	0.76104
MA0671.1_NFIX	AXL+ SIGLEX6+ DC	0.0246961	-0.0218854	-0.020926	0.000240093		-0.0218854	0.0161315	-0.0780055	0.0191181	0.403807	0.76104
MA0083.3_SRF	AXL+ SIGLEX6+ DC	0.0364951	-0.0113102	-0.0185998	-0.0615604		-0.0113102	-0.0343573	-0.00235701	-0.0195705	0.403807	0.76104
MA0507.1_POU2F2	AXL+ SIGLEX6+ DC	-0.0100394	0.000996523	0.0118534	0.045066		0.000996523	-0.00672927	0.0241902	0.0243449	0.415916	0.76104
MA0670.1_NFIA	AXL+ SIGLEX6+ DC	0.0267461	-0.00839165	-0.00667706	-0.0105832		-0.00839165	0.0265296	-0.0486152	0.010786	0.416862	0.76104
MA0641.1_ELF4	AXL+ SIGLEX6+ DC	-0.0137212	0.0238014	-0.00261753	-0.0341844		0.0238014	-6.23494e-05	-0.00875583	0.00454871	0.426445	0.76104
MA0690.1_TBX21	AXL+ SIGLEX6+ DC	0.0127104	-0.0326978	0.00284614	0.0487905		-0.0326978	0.0160352	-0.0200449	0.0222499	0.426445	0.76104
MA0098.3_ETS1	AXL+ SIGLEX6+ DC	-0.013545	0.0285351	-0.00444493	-0.019839		0.0285351	-0.00842873	-0.00702012	0.00867307	0.426445	0.76104
MA0755.1_CUX2	AXL+ SIGLEX6+ DC	0.0526539	0.0211572	-0.0689178	0.0318772		0.0211572	-0.0418179	-0.0614136	-0.138126	0.440232	0.77374
MA0862.1_GMEB2	AXL+ SIGLEX6+ DC	0.0031501	0.0613775	0.0119668	-0.0582889		0.0613775	-0.0981624	0.115569	0.0250216	0.468092	0.810428
MA0160.1_NR4A2	AXL+ SIGLEX6+ DC	-0.0121482	0.00586054	0.00989833	0.0528477		0.00586054	0.042963	-0.00536624	-0.0257019	0.517321	0.866598
MA0464.2_BHLHE40	AXL+ SIGLEX6+ DC	-0.0197822	0.0188861	0.0138387	0.0196333		0.0188861	0.0261311	-0.00299387	0.0229187	0.524424	0.866598
MA0825.1_MNT	AXL+ SIGLEX6+ DC	-0.00680609	-0.0158965	0.0120395	-0.0084781		-0.0158965	-0.0073527	0.0376698	-0.000436795	0.530417	0.866598
MA0855.1_RXRB	AXL+ SIGLEX6+ DC	-0.000144753	-0.00839099	0.019855	-0.0194047		-0.00839099	0.0388235	-0.00408232	0.0297924	0.530417	0.866598
MA0736.1_GLIS2	AXL+ SIGLEX6+ DC	0.00458357	0.0127366	-0.00735257	0.0151375		0.0127366	0.0234132	-0.0340682	-0.0154528	0.547566	0.882189
MA0657.1_KLF13	AXL+ SIGLEX6+ DC	0.00578481	-0.000177975	-0.0071983	-0.00201656		-0.000177975	0.0176436	-0.0268291	-0.0176205	0.599677	0.922462
MA0466.2_CEBPB	AXL+ SIGLEX6+ DC	0.00834869	-0.0109869	-0.00777029	-0.0162448		-0.0109869	0.0520039	-0.0924551	0.042051	0.621885	0.922462
MA0073.1_RREB1	AXL+ SIGLEX6+ DC	-0.00184994	0.0042305	0.00074423	0.00141374		0.0042305	0.00123154	0.00814967	-0.0150413	0.633295	0.922462
MA0625.1_NFATC3	AXL+ SIGLEX6+ DC	-0.00403506	0.0225732	-0.0114076	-0.0415171		0.0225732	0.0125214	-0.0245166	-0.0330477	0.633295	0.922462
MA0145.3_TFCP2	AXL+ SIGLEX6+ DC	-0.00434877	0.0408771	-0.000677301	-0.0405654		0.0408771	-0.0306814	0.0808603	-0.103744	0.633295	0.922462
MA0749.1_ZBED1	AXL+ SIGLEX6+ DC	0.0288435	-0.0251753	-0.0136123	0.0199746		-0.0251753	-0.0468082	0.0583091	-0.0910635	0.633295	0.922462
MA0660.1_MEF2B	AXL+ SIGLEX6+ DC	0.0159283	-0.00972111	9.25162e-06	0.0144808		-0.00972111	-0.00248589	-0.0507472	0.106512	0.636181	0.922462
MA0511.2_RUNX2	AXL+ SIGLEX6+ DC	0.0253085	-0.00354995	0.0011472	-0.0430207		-0.00354995	-0.0235346	0.00725066	0.0383039	0.636181	0.922462
MA0139.1_CTCF	AXL+ SIGLEX6+ DC	-0.00823854	-0.00656937	0.0165763	-0.0149561		-0.00656937	0.00115947	0.0420298	-0.00349722	0.656748	0.940528
MA0159.1_RARA::RXRA	AXL+ SIGLEX6+ DC	0.0072143	-0.00805477	-0.00670885	0.0669467		-0.00805477	0.0136035	-0.0665036	0.072256	0.673374	0.941101
MA0517.1_STAT1::STAT2	AXL+ SIGLEX6+ DC	-0.00197928	-0.0147849	0.0033096	0.0227113		-0.0147849	0.0156176	-0.0316195	0.0485519	0.673374	0.941101
MA0838.1_CEBPG	AXL+ SIGLEX6+ DC	-0.00805843	0.00820844	-0.00580834	0.00963934		0.00820844	0.0599465	-0.0753299	0.00172518	0.720887	0.969202
MA0773.1_MEF2D	AXL+ SIGLEX6+ DC	0.0165228	-0.0115276	-0.00501107	0.0213184		-0.0115276	-0.0129497	-0.040696	0.0822359	0.734114	0.969202
MA0144.2_STAT3	AXL+ SIGLEX6+ DC	-0.00905063	-0.00207037	-0.00387386	0.0187384		-0.00207037	-0.00885258	-7.13314e-05	-0.00152146	0.735784	0.969202
MA0795.1_SMAD3	AXL+ SIGLEX6+ DC	-0.0237967	0.00649743	-0.0101177	0.0796507		0.00649743	-0.0414123	0.0500791	-0.0679224	0.735784	0.969202
MA0663.1_MLX	AXL+ SIGLEX6+ DC	-0.00623676	0.0158541	0.00624217	0.0215627		0.0158541	0.0105144	-0.00539311	0.0209683	0.750989	0.969202
MA0903.1_HOXB3	AXL+ SIGLEX6+ DC	-0.00448212	-0.00829211	-0.0154146	0.135914		-0.00829211	-0.0163156	-0.0552641	0.0660862	0.754411	0.969202
MA0772.1_IRF7	AXL+ SIGLEX6+ DC	-0.0118915	-0.00909459	0.00700985	-0.0348454		-0.00909459	0.0385409	-0.00864472	-0.0247431	0.763033	0.969202
MA0729.1_RARA	AXL+ SIGLEX6+ DC	0.0118652	-0.0136599	0.0141207	-0.0520165		-0.0136599	0.0086307	0.0100788	0.0331847	0.771753	0.969202
MA0694.1_ZBTB7B	AXL+ SIGLEX6+ DC	0.00966265	-0.0481444	0.0174302	0.0356702		-0.0481444	-0.0181552	0.00163443	0.120192	0.777033	0.969202
MA0770.1_HSF2	AXL+ SIGLEX6+ DC	-0.00999228	0.00501403	-0.0168208	0.061281		0.00501403	0.0117008	-0.035318	-0.0368696	0.777033	0.969202
MA0058.3_MAX	AXL+ SIGLEX6+ DC	0.00994351	-0.0270279	0.0139107	-0.00793195		-0.0270279	-0.0252849	0.0785156	-0.0369081	0.816872	0.982089
MA0894.1_HESX1	AXL+ SIGLEX6+ DC	-0.00685229	0.0101773	0.0281877	0.0140427		0.0101773	0.0579258	-0.0470506	0.119188	0.816872	0.982089
MA0101.1_REL	AXL+ SIGLEX6+ DC	-0.0173416	0.00242751	0.0083545	0.00696613		0.00242751	0.0442966	0.0160826	-0.0789858	0.83186	0.982089
MA0837.1_CEBPE	AXL+ SIGLEX6+ DC	0.00898669	-0.00434341	-0.0219584	-0.0140939		-0.00434341	0.0401989	-0.111723	0.0332557	0.83186	0.982089
MA0498.2_MEIS1	AXL+ SIGLEX6+ DC	0.00895527	0.00680977	-0.0134724	0.039945		0.00680977	0.00862047	0.00698279	-0.0985688	0.860708	0.982089
MA0050.2_IRF1	AXL+ SIGLEX6+ DC	0.000690932	-0.00328818	-0.000166065	0.0105235		-0.00328818	0.0122503	-0.0196706	0.0140105	0.872525	0.982089
MA0157.2_FOXO3	AXL+ SIGLEX6+ DC	0.0122454	0.00357088	0.00653443	-0.0324715		0.00357088	-0.00370389	0.0152365	0.00960696	0.872525	0.982089
MA0486.2_HSF1	AXL+ SIGLEX6+ DC	0.00657863	-0.0204735	-0.00827348	0.111477		-0.0204735	-0.0253765	0.0299936	-0.0506016	0.872525	0.982089
MA0497.1_MEF2C	AXL+ SIGLEX6+ DC	-0.00092532	0.00907472	-0.0046931	-0.0196209		0.00907472	0.00713072	-0.0409481	0.0441693	0.880494	0.982089
MA0258.2_ESR2	AXL+ SIGLEX6+ DC	0.0087	0.0102756	0.00438995	-0.0247931		0.0102756	-0.005792	0.0232376	-0.0129415	0.880494	0.982089
MA0525.2_TP63	AXL+ SIGLEX6+ DC	0.0040345	-0.027011	-0.0251174	0.0898423		-0.027011	0.0108776	-0.100028	0.0527127	0.880494	0.982089
MA0513.1_SMAD2::SMAD3::SMAD4	AXL+ SIGLEX6+ DC	-0.00216635	-9.41459e-05	0.00138509	-0.00895543		-9.41459e-05	-0.0316226	0.0307988	0.00857305	0.921439	0.9944
MA0074.1_RXRA::VDR	AXL+ SIGLEX6+ DC	0.0123544	-0.0072076	0.00111041	0.0154448		-0.0072076	-0.00840155	0.00907196	0.00421123	0.93197	0.9944
MA0504.1_NR2C2	AXL+ SIGLEX6+ DC	0.00069571	-0.00168123	0.00633255	-0.00686835		-0.00168123	0.0145505	-0.00202409	0.00660988	0.93197	0.9944
MA0088.2_ZNF143	AXL+ SIGLEX6+ DC	0.00195318	-0.00560791	0.000317995	-0.0384651		-0.00560791	-0.00603719	-0.0294201	0.0725045	0.93197	0.9944
MA0059.1_MAX::MYC	AXL+ SIGLEX6+ DC	-0.0107882	-0.0076664	0.0226285	0.00438551		-0.0076664	0.00343468	0.0746513	-0.0430297	0.968683	0.9944
MA0652.1_IRF8	AXL+ SIGLEX6+ DC	-0.00719782	-0.00314382	-0.0169848	0.00645026		-0.00314382	-0.00119216	-0.0287883	-0.0249634	0.968683	0.9944
MA0653.1_IRF9	AXL+ SIGLEX6+ DC	-0.00804612	-0.0163882	-0.000174846	-0.00512689		-0.0163882	0.0152525	-0.0144485	-0.00248213	0.968683	0.9944
MA0692.1_TFEB	AXL+ SIGLEX6+ DC	-0.0017525	0.00840499	6.36311e-05	-0.0150334		0.00840499	0.00691148	0.00944192	-0.0323887	0.968683	0.9944
MA0785.1_POU2F1	AXL+ SIGLEX6+ DC	0.00514691	0.00817284	0.00324385	0.045461		0.00817284	-0.00597906	-0.0185653	0.065308	0.968683	0.9944
MA0738.1_HIC2	AXL+ SIGLEX6+ DC	0.00139692	0.00529471	0.00389984	0.0165441		0.00529471	0.0131079	0.00317311	-0.0130628	0.979753	0.996942
MA0051.1_IRF2	AXL+ SIGLEX6+ DC	-0.0142364	-0.00985456	-0.00315489	0.00115658		-0.00985456	0.0326535	-0.0339799	-0.0131215	1	1
MA0762.1_ETV2	AXL+ SIGLEX6+ DC	-0.00067591	0.0111431	0.00528053	0.00819299		0.0111431	-0.00670093	-0.00315571	0.046116	1	1
MA0687.1_SPIC	CD14+ Monocyte	0.0169013	-0.00709638	-0.0116682	0.00638155	-0.00581858	-0.00965196	0.00120327	-0.0133303	-0.01831	7.55109e-05	0.0101903	0.000114611	0.000150146	0.54998	0.000225219	0.000225219	0.54998
MA0719.1_RHOXF1	CD14+ Monocyte	-0.0189906	0.00255044	0.0046898	-0.00393706	0.00336895	0.000913416	0.00431954	0.00623545	0.00313339	9.39198e-05	0.0101903	0.000252647	0.000122515	0.492491	0.000378971	0.000367546	0.492491
MA0757.1_ONECUT3	CD14+ Monocyte	-0.0126989	0.00556835	0.0046946	-0.00759294	0.00380231	0.00910041	0.000816918	0.000557414	0.0121064	0.000404099	0.0197549	0.00053668	0.00058309	0.610592	0.000874635	0.000874635	0.610592
MA0660.1_MEF2B	CD14+ Monocyte	-0.0154946	0.00186406	0.00456866	-0.0158603	0.00336351	-0.00113484	0.00208499	0.00788182	0.00235907	0.00042701	0.0197549	0.00109877	0.000330691	0.673998	0.00164816	0.000992074	0.673998
MA0637.1_CENPB	CD14+ Monocyte	-0.00973655	-0.00413708	0.00615123	-0.0011643	-0.00630266	0.000194062	0.00674794	0.00363794	0.0086856	0.000485886	0.0197549	0.156288	0.0010064	0.003233	0.156288	0.0030192	0.0048495
MA0820.1_FIGLA	CD14+ Monocyte	-0.0134135	0.00154911	0.0031943	-0.00871448	0.00076612	0.00311509	-0.00341164	0.00528164	0.00516304	0.000546218	0.0197549	0.00053668	0.00120151	0.22333	0.00161004	0.00180226	0.22333
MA0095.2_YY1	CD14+ Monocyte	-0.0158395	-0.00304099	0.00808028	-0.010234	-0.00169862	-0.00572574	0.00263397	0.00598599	0.0141545	0.000768775	0.0213102	0.0602125	0.000272427	0.0540779	0.0602125	0.000817282	0.0602125
MA0773.1_MEF2D	CD14+ Monocyte	-0.0133694	0.00167364	0.00578112	-0.0135391	0.00370584	-0.00239076	0.00453653	0.00717756	0.00498167	0.00091945	0.0213102	0.006211	0.000483798	0.258831	0.0093165	0.00145139	0.258831
MA0755.1_CUX2	CD14+ Monocyte	-0.0238557	0.000212421	0.00609803	-0.0139535	-0.00223988	0.00511703	0.0002525	0.00532078	0.0109018	0.00104524	0.0213102	0.00412677	0.00058309	0.412676	0.00619016	0.00174927	0.412676
MA0846.1_FOXC2	CD14+ Monocyte	-0.00572412	-2.7222e-05	0.00341667	-0.00273797	-0.00155627	0.00303088	-0.00124302	0.00237787	0.00773507	0.00106025	0.0213102	0.0697861	0.000330691	0.0661139	0.0697861	0.000992074	0.0697861
MA0822.1_HES7	CD14+ Monocyte	-0.0185881	-0.00239067	0.00167316	-0.0124969	-0.00262773	-0.00191656	-0.00667283	0.00670685	0.00136453	0.00108024	0.0213102	0.006211	0.00058309	0.277976	0.0093165	0.00174927	0.277976
MA0754.1_CUX1	CD14+ Monocyte	-0.0199696	0.00643592	0.00348809	-0.0196177	0.00269349	0.0139208	-0.00134028	0.00123341	0.00933746	0.00125759	0.0227415	0.00173586	0.00143106	0.465004	0.00260379	0.00260379	0.465004
MA0772.1_IRF7	CD14+ Monocyte	-0.0190534	-0.012822	0.0177271	-0.0174404	-0.00645464	-0.0255567	0.0224435	0.00701032	0.0270857	0.0014732	0.0245911	0.531045	0.00201581	0.0049261	0.531045	0.00604743	0.00738914
MA0131.2_HINFP	CD14+ Monocyte	-0.00673763	-0.00633263	0.00185873	-0.00790398	-0.00779369	-0.00341051	-0.00212808	0.00250965	0.00375721	0.00159355	0.0247	0.766679	0.00971542	0.00113538	0.766679	0.0145731	0.00340615
MA0645.1_ETV6	CD14+ Monocyte	0.00753459	-0.00558286	-0.00892393	-0.00216278	-0.00769956	-0.00134944	-0.0074048	-0.00594082	-0.013417	0.00183761	0.026584	0.0134105	0.000701094	0.298062	0.0201158	0.00210328	0.298062
MA0749.1_ZBED1	CD14+ Monocyte	-0.0109332	-0.0185557	0.0109697	-0.022695	-0.029301	0.00293493	0.00830592	0.00772075	0.0165359	0.00235181	0.0296966	0.339021	0.00722664	0.003233	0.339021	0.01084	0.00969899
MA0511.2_RUNX2	CD14+ Monocyte	0.010134	-0.00354334	-0.0082198	0.00292364	-0.00803332	0.00543663	-0.0135295	-0.00206258	-0.0118634	0.0023586	0.0296966	0.0134105	0.000701094	0.520827	0.0201158	0.00210328	0.520827
MA0821.1_HES5	CD14+ Monocyte	-0.0189754	-0.00191457	0.00101083	-0.0164858	-0.00141543	-0.00291285	-0.00502783	0.00807623	-0.00320636	0.00246331	0.0296966	0.00507291	0.00170045	0.438391	0.00760937	0.00510136	0.438391
MA0646.1_GCM1	CD14+ Monocyte	-0.00938197	-0.00421826	0.000518476	-0.00468471	-0.00593785	-0.000779076	-0.00228847	-1.07014e-05	0.00300714	0.00278551	0.0303152	0.106206	0.00201581	0.0317443	0.106206	0.00604743	0.0476164
MA0886.1_EMX2	CD14+ Monocyte	-0.00835036	-0.000130101	0.00358988	-0.0158555	-0.0012319	0.00207349	0.0069017	0.00150721	0.00381177	0.00279403	0.0303152	0.0160957	0.00120151	0.277976	0.0241435	0.00360452	0.277976
MA0861.1_TP73	CD14+ Monocyte	-0.00887454	0.00113145	0.00110417	-0.00812754	0.00304914	-0.00270393	0.00253251	0.00378166	-0.00297181	0.0029762	0.0307541	0.00412677	0.00201581	0.911853	0.00619016	0.00604743	0.911853
MA0144.2_STAT3	CD14+ Monocyte	0.000313084	-0.00530442	0.000627798	-0.00571896	-0.00635874	-0.00319576	-0.000848621	0.00232457	-0.000367487	0.00332299	0.0327768	0.0517542	0.669538	0.000364412	0.0776313	0.669538	0.00109323
MA0862.1_GMEB2	CD14+ Monocyte	-0.025607	-0.006936	0.0113945	-0.0234994	-0.00920591	-0.00239618	0.000455227	0.0130734	0.0167286	0.0035899	0.0338699	0.0697861	0.00331122	0.0354365	0.0697861	0.00993366	0.0531547
MA0802.1_TBR1	CD14+ Monocyte	-0.00279809	0.00431821	-0.00158713	-0.000786069	0.00418797	0.00457871	-0.00199594	-0.000640219	-0.00241932	0.00393658	0.0355932	0.00757404	0.497879	0.003233	0.0113611	0.497879	0.00969899
MA0112.3_ESR1	CD14+ Monocyte	-0.0128642	0.00270308	0.00169363	-0.0119806	0.00370204	0.000705169	-0.00282406	0.00659408	-0.00101176	0.00459339	0.0389936	0.00216857	0.00621106	0.911853	0.00650571	0.00931659	0.911853
MA0838.1_CEBPG	CD14+ Monocyte	-0.0295977	-0.0144566	0.022456	-0.0460907	-0.0214605	-0.000448777	-0.0030678	0.0367245	0.0228253	0.00467205	0.0389936	0.306762	0.00722664	0.00958579	0.306762	0.0143787	0.0143787
MA0790.1_POU4F1	CD14+ Monocyte	-0.00551599	-0.00134951	0.00429486	0.00123678	-0.00231188	0.000575228	-0.000613744	0.00277405	0.00934155	0.00558126	0.0448568	0.156288	0.00281293	0.0540779	0.156288	0.0084388	0.0811168
MA0688.1_TBX2	CD14+ Monocyte	-0.000816628	0.00545847	-0.0027736	-0.0064359	0.00527828	0.00581884	-0.00804016	-0.000327373	-0.0021165	0.00615062	0.0473544	0.0805752	0.782431	0.000828193	0.120863	0.782431	0.00248458
MA0768.1_LEF1	CD14+ Monocyte	0.00350846	-0.00407408	0.00161616	0.00127541	-0.0043277	-0.00356684	0.00504376	-0.000769682	0.00211456	0.00632847	0.0473544	0.0160957	0.238029	0.0049261	0.0241435	0.238029	0.0147783
MA0159.1_RARA::RXRA	CD14+ Monocyte	0.0101445	0.00123164	-0.00572895	-0.000537938	0.00290255	-0.00211017	-0.00601752	-0.00216166	-0.0096984	0.00681183	0.0481373	0.0602125	0.00331122	0.126591	0.0903188	0.00993366	0.126591
MA0046.2_HNF1A	CD14+ Monocyte	-0.0075432	0.0031781	0.00630625	-0.00727452	0.00190692	0.00572048	0.00182511	0.00351332	0.0125521	0.00687676	0.0481373	0.0192424	0.00281293	0.492491	0.0288637	0.0084388	0.492491
MA0914.1_ISL2	CD14+ Monocyte	0.00030669	-0.0069267	0.000852576	-0.00294174	-0.00734915	-0.00608181	-0.00252141	0.0033093	0.000235724	0.00734017	0.0489415	0.00757404	0.821245	0.006464	0.0113611	0.821245	0.0113611
MA0136.2_ELF5	CD14+ Monocyte	0.00853751	-0.00626191	-0.00592634	-0.00266022	-0.00667311	-0.00543952	-0.00257651	-0.00615663	-0.00789089	0.00744271	0.0489415	0.006211	0.00621106	0.807584	0.00931659	0.00931659	0.807584
MA0653.1_IRF9	CD14+ Monocyte	-0.0198833	-0.0155967	0.0228494	-0.0208952	-0.00534759	-0.036095	0.0396698	0.0065043	0.030705	0.00889574	0.0566695	0.869066	0.00722664	0.0178353	0.869066	0.0216799	0.0267529
MA0652.1_IRF8	CD14+ Monocyte	-0.0225546	-0.0184629	0.0237038	-0.0274306	-0.00761979	-0.040149	0.0376651	0.0066843	0.0342525	0.00914025	0.0566695	0.766679	0.0148849	0.00958579	0.766679	0.0223273	0.0223273
MA0259.1_ARNT::HIF1A	CD14+ Monocyte	-0.0106726	-0.00371225	0.00156156	-0.00657143	-0.00229434	-0.00654808	-0.00929825	0.0034709	0.00657387	0.0102372	0.0617078	0.0805752	0.00621106	0.0968083	0.0968083	0.0186332	0.0968083
MA0834.1_ATF7	CD14+ Monocyte	-0.0166475	-0.00389947	0.00667512	-0.021309	-0.00394744	-0.00380352	0.000410368	0.00957192	0.00747202	0.0106344	0.0618502	0.0602125	0.00722664	0.106041	0.0903188	0.0216799	0.106041
MA0051.1_IRF2	CD14+ Monocyte	-0.0144852	-0.0155113	0.0169915	-0.0155365	-0.00849284	-0.0295482	0.0293093	0.00462339	0.0232092	0.0108309	0.0618502	1	0.0328502	0.005648	1	0.0492752	0.016944
MA0756.1_ONECUT2	CD14+ Monocyte	-0.0131585	0.00256009	0.0028381	-0.00934383	0.00147822	0.00472382	-0.00292524	0.00107189	0.0087409	0.012522	0.0669846	0.0111292	0.00838882	0.911853	0.0166938	0.0166938	0.911853
MA0758.1_E2F7	CD14+ Monocyte	-0.0104705	-0.00405343	0.00141292	-0.00738709	-0.00806717	0.00397405	-0.00351954	0.00266301	0.0032428	0.0126651	0.0669846	0.121251	0.00722664	0.0882301	0.121251	0.0216799	0.121251
MA0145.3_TFCP2	CD14+ Monocyte	-0.0109487	-0.00219065	-5.83548e-05	-0.00889768	-0.000586765	-0.0053984	-0.00178952	-0.000374905	0.00146507	0.0128786	0.0669846	0.0271799	0.00532584	0.54998	0.0407698	0.0159775	0.54998
MA0837.1_CEBPE	CD14+ Monocyte	-0.0206403	-0.0197828	0.0175444	-0.0364999	-0.0285926	-0.00216307	-0.00535094	0.0308069	0.017335	0.0129648	0.0669846	0.973699	0.0254614	0.00958579	0.973699	0.0381921	0.0287574
MA0597.1_THAP1	CD14+ Monocyte	0.00519389	-0.00286274	-0.00482944	0.0021081	-0.00403353	-0.000521158	-0.00488656	-0.00178468	-0.00834358	0.0135611	0.0684365	0.0377971	0.00388867	0.70663	0.0566956	0.011666	0.70663
MA0466.2_CEBPB	CD14+ Monocyte	-0.0202066	-0.0189608	0.017467	-0.0380188	-0.0273838	-0.00211484	-0.00756157	0.0301936	0.0193051	0.0140487	0.0692856	1	0.0328502	0.00842106	1	0.0492752	0.0252632
MA0794.1_PROX1	CD14+ Monocyte	-0.00815743	0.000170199	0.00194975	-0.0106987	-0.000346104	0.0012028	0.00100016	0.00251631	0.00192184	0.01572	0.0740005	0.0229142	0.00838882	0.520827	0.0343713	0.0251664	0.520827
MA0137.3_STAT1	CD14+ Monocyte	-0.00170999	-0.00436584	0.00142468	-0.0069741	-0.00548013	-0.00213726	-0.00134912	0.00375235	0.000558256	0.0157854	0.0740005	0.176462	0.633368	0.00208737	0.264693	0.633368	0.0062621
MA0657.1_KLF13	CD14+ Monocyte	-0.00524165	0.00800598	0.00548143	0.00413052	0.0102118	0.00359438	0.00882761	-0.000463424	0.0101863	0.0162146	0.0740005	0.0192424	0.00971542	0.520827	0.0288637	0.0288637	0.520827
MA0497.1_MEF2C	CD14+ Monocyte	-0.00822039	0.000335118	0.00254753	-0.00844364	0.000349796	0.000305762	-0.000745361	0.0042842	0.00271668	0.0163688	0.0740005	0.0443138	0.00532584	0.54998	0.0664707	0.0159775	0.54998
MA0024.3_E2F1	CD14+ Monocyte	-0.0154592	0.000450367	0.00475671	-0.00696401	-0.00126297	0.00387704	-0.00365954	0.0029909	0.0124276	0.0198882	0.0880764	0.0517542	0.00621106	0.579915	0.0776313	0.0186332	0.579915
MA0899.1_HOXA10	CD14+ Monocyte	-0.000595533	-0.00293916	0.00348915	-0.00317659	-0.00419431	-0.000428865	0.00125385	0.00254254	0.00608374	0.0204165	0.0886074	0.575157	0.0746771	0.00842106	0.575157	0.112016	0.0252632
MA0517.1_STAT1::STAT2	CD14+ Monocyte	-0.00147172	-0.0109378	0.00567769	-0.00937568	-0.00627578	-0.0202619	0.014755	-0.000378017	0.00669113	0.0219349	0.09291	0.0602125	0.436422	0.00958579	0.0903188	0.436422	0.0287574
MA0050.2_IRF1	CD14+ Monocyte	-0.00164057	-0.00762464	0.00508762	-0.00485777	-0.00511864	-0.0126366	0.0126841	0.000300412	0.00560838	0.0222641	0.09291	0.106206	0.200423	0.0108921	0.159309	0.200423	0.0326762
MA0507.1_POU2F2	CD14+ Monocyte	-0.000185079	-0.00229224	0.00393045	-0.00395141	-0.00168616	-0.0035044	0.00506701	0.00288561	0.00439173	0.0233013	0.0949308	0.276605	0.125672	0.00958579	0.276605	0.188508	0.0287574
MA0729.1_RARA	CD14+ Monocyte	-0.00651434	0.00343903	0.00192596	-0.00864942	0.0049483	0.000420486	0.00154831	0.0075102	-0.00433722	0.0236233	0.0949308	0.00173586	0.0746771	1	0.00520758	0.112016	1
MA0671.1_NFIX	CD14+ Monocyte	0.00143338	0.000789289	-0.00480373	0.000594568	0.00011188	0.00214411	-0.00880642	-0.00358666	-0.00355518	0.0244853	0.0966055	0.817483	0.0289535	0.0225805	0.817483	0.0434302	0.0434302
MA0091.1_TAL1::TCF3	CD14+ Monocyte	0.00543426	-0.00157659	-0.00344088	0.00337449	-0.00248656	0.000243339	-0.00974588	-0.00165008	-0.00132682	0.0277632	0.107337	0.0443138	0.0112259	0.641969	0.0664707	0.0336777	0.641969
MA0600.2_RFX2	CD14+ Monocyte	0.0117896	-0.0012976	-0.00406546	0.00308433	-0.00482362	0.00575444	0.000398891	-0.00272205	-0.00860901	0.0285596	0.107337	0.0443138	0.0112259	0.70663	0.0664707	0.0336777	0.70663
MA0776.1_MYBL1	CD14+ Monocyte	-0.0152668	0.00123159	-0.00377209	-0.0118893	0.000442352	0.00281007	0.00427424	-0.0061024	-0.00641761	0.0286892	0.107337	0.0160957	0.0371874	0.387877	0.048287	0.0557812	0.387877
MA0510.2_RFX5	CD14+ Monocyte	0.0129488	0.000923329	-0.00482038	0.00336756	-0.00188713	0.00654426	-0.00665788	-0.00322848	-0.0054526	0.0295349	0.108582	0.121251	0.00838882	0.364008	0.181876	0.0251664	0.364008
MA0644.1_ESX1	CD14+ Monocyte	-0.00493176	0.000991898	0.001111	-0.00779818	3.79203e-06	0.00296811	-0.00106376	0.00151588	0.00208847	0.0308566	0.108582	0.0517542	0.00971542	0.911853	0.0776313	0.0291463	0.911853
MA0801.1_MGA	CD14+ Monocyte	-0.00166853	0.00565604	-0.00309087	-0.00642864	0.00551732	0.00593349	-0.00774015	0.00165823	-0.00553197	0.0310234	0.108582	0.0602125	0.563662	0.0139876	0.0903188	0.563662	0.0419628
MA0803.1_TBX15	CD14+ Monocyte	-0.00166853	0.00565604	-0.00309087	-0.00642864	0.00551732	0.00593349	-0.00774015	0.00165823	-0.00553197	0.0310234	0.108582	0.0602125	0.563662	0.0139876	0.0903188	0.563662	0.0419628
MA0686.1_SPDEF	CD14+ Monocyte	-0.00325064	-0.00549927	0.00544901	-0.0133369	-0.00689598	-0.00270585	-0.00313325	0.00565504	0.0109302	0.0328158	0.113032	0.531045	0.152437	0.00958579	0.531045	0.228656	0.0287574
MA0791.1_POU4F3	CD14+ Monocyte	-0.00404059	0.00164102	0.00502924	0.000950003	0.000898268	0.00312653	-0.00232689	0.00206328	0.0133936	0.0335609	0.113793	0.0443138	0.0195566	0.387877	0.0664707	0.0586697	0.387877
MA0101.1_REL	CD14+ Monocyte	0.00461319	0.0161027	-0.0115177	0.0118776	0.0190649	0.0101782	-0.0012285	-0.0098867	-0.02028	0.0376294	0.122003	0.339021	0.102719	0.0200859	0.339021	0.154078	0.0602577
MA0711.1_OTX1	CD14+ Monocyte	-0.00714659	-0.00789561	0.0054565	-0.0215317	-0.00722578	-0.00923527	0.00171078	0.00417769	0.0094456	0.0378236	0.122003	0.716859	0.042003	0.0317443	0.716859	0.0630045	0.0630045
MA0762.1_ETV2	CD14+ Monocyte	0.00412179	-0.00772565	-0.00620212	-0.00695028	-0.0100969	-0.00298308	-0.00865878	-0.00313968	-0.00813719	0.0384913	0.122003	0.0271799	0.0254614	0.807584	0.0407698	0.0407698	0.807584
MA0865.1_E2F8	CD14+ Monocyte	-0.00604257	-0.00423601	0.00136855	-0.00755144	-0.00603197	-0.000644071	0.00177052	0.00117475	0.00132666	0.0385951	0.122003	0.921212	0.0746771	0.0178353	0.921212	0.112016	0.0535059
MA0130.1_ZNF354C	CD14+ Monocyte	-0.00297315	-0.00216931	0.00116522	-0.00388912	-0.0032248	-5.83443e-05	0.00182987	0.00244697	-0.000773263	0.0387935	0.122003	0.921212	0.0289535	0.0439283	0.921212	0.0658925	0.0658925
MA0524.2_TFAP2C	CD14+ Monocyte	0.00330449	-0.00154196	-0.00284951	-0.00231209	-0.00260549	0.000585102	-0.00144727	-0.00134159	-0.00554357	0.0426793	0.131117	0.156288	0.00722664	0.73981	0.234432	0.0216799	0.73981
MA0527.1_ZBTB33	CD14+ Monocyte	-0.00130001	-0.00527634	0.00906209	-0.00286924	-0.00606295	-0.00370313	0.00638246	0.00633559	0.0140294	0.0429001	0.131117	0.531045	0.102719	0.0200859	0.531045	0.154078	0.0602577
MA0504.1_NR2C2	CD14+ Monocyte	0.00401704	-0.00126511	-0.00251198	0.00164282	-0.000574804	-0.00264571	-0.000167796	-0.00156652	-0.00517781	0.0453586	0.13487	0.276605	0.00838882	0.387877	0.387877	0.0251664	0.387877
MA0107.1_RELA	CD14+ Monocyte	0.00624593	0.0129577	-0.0123287	0.0107513	0.0164968	0.00587947	-0.00183035	-0.0117788	-0.0199692	0.0453709	0.13487	0.488718	0.102719	0.0225805	0.488718	0.154078	0.0677416
MA0699.1_LBX2	CD14+ Monocyte	-0.00466587	-0.00129623	0.00104467	-0.00516249	-0.00112874	-0.00163121	-8.73088e-05	6.50894e-05	0.00294216	0.0519185	0.152247	0.0697861	0.0254614	0.465004	0.104679	0.0763843	0.465004
MA0070.1_PBX1	CD14+ Monocyte	-0.0029245	0.00443363	-0.00136656	0.00480477	0.00487674	0.00354741	-0.00348503	-0.00273626	0.00164374	0.0530765	0.153568	0.0321142	0.821245	0.0439283	0.0658925	0.821245	0.0658925
MA0141.3_ESRRB	CD14+ Monocyte	0.00518675	-0.00231511	-0.00866037	-0.00164993	-0.00144377	-0.00405781	-0.0103007	-0.00266892	-0.0145568	0.054054	0.154338	0.106206	0.0195566	0.492491	0.159309	0.0586697	0.492491
MA0752.1_ZNF410	CD14+ Monocyte	-0.00559853	0.00226147	0.00370832	0.00458419	0.00397196	-0.00115952	0.00351422	0.00206964	0.00574952	0.0586851	0.164108	0.0926813	0.0223399	0.579915	0.139022	0.0670197	0.579915
MA0506.1_NRF1	CD14+ Monocyte	-0.0168427	-0.0144933	4.5815e-05	-0.0134912	-0.0156881	-0.0121038	-0.0051184	0.0028662	0.000198176	0.0589882	0.164108	0.921212	0.0668543	0.039489	0.921212	0.100282	0.100282
MA0695.1_ZBTB7C	CD14+ Monocyte	-0.00744499	-0.00178092	-0.00138694	-0.00500803	-0.00198655	-0.00136965	-0.00245847	0.0014368	-0.00396694	0.0623612	0.171296	0.0443138	0.0532274	0.319096	0.0798411	0.0798411	0.319096
MA0808.1_TEAD3	CD14+ Monocyte	0.00242632	-0.00801643	-0.000487146	-0.000310965	-0.0112658	-0.00151776	0.00333989	-0.000188631	-0.00338678	0.0642025	0.174149	0.0602125	0.497879	0.0439283	0.0903188	0.497879	0.0903188
MA0032.2_FOXC1	CD14+ Monocyte	-0.00392272	0.00147048	0.00319037	-0.00193545	0.00133639	0.00173864	-0.00333647	0.000822545	0.010304	0.0695078	0.186212	0.0377971	0.0532274	0.579915	0.0798411	0.0798411	0.579915
MA0740.1_KLF14	CD14+ Monocyte	-0.00268182	0.00649202	0.00673277	0.000657011	0.00881242	0.00185122	0.00913689	0.00121093	0.0115722	0.0732661	0.193533	0.121251	0.0195566	0.947043	0.181876	0.0586697	0.947043
MA0725.1_VSX1	CD14+ Monocyte	-0.00857393	-0.00049971	0.0026577	-0.00988946	0.000390986	-0.0022811	0.00396148	0.00605042	-0.00216967	0.0740242	0.193533	0.106206	0.042003	0.319096	0.159309	0.126009	0.319096
MA0799.1_RFX4	CD14+ Monocyte	0.0112455	-0.000747726	-0.00168477	-0.000342977	-0.00419519	0.0061472	0.000385093	-0.00140845	-0.00338706	0.0772267	0.199502	0.0805752	0.0328502	0.842057	0.120863	0.0985505	0.842057
MA0778.1_NFKB2	CD14+ Monocyte	-0.000267424	0.0109461	-0.00835285	0.00266094	0.0137228	0.00539283	0.0017757	-0.00300745	-0.0213415	0.0833884	0.212886	0.409811	0.238029	0.0317443	0.409811	0.357044	0.0952328
MA0028.2_ELK1	CD14+ Monocyte	-0.00728277	-0.00590287	0.00369036	-0.0143764	-0.00790907	-0.00189045	-0.00230755	0.00316646	0.00830019	0.0871388	0.219874	0.921212	0.102719	0.0487819	0.921212	0.154078	0.146346
MA0683.1_POU4F2	CD14+ Monocyte	-0.00172932	0.000742771	0.00469461	0.00209952	-0.000532021	0.00329236	0.00721778	0.000921127	0.00741489	0.0892841	0.221526	0.339021	0.0254614	0.341079	0.341079	0.0763843	0.341079
MA0797.1_TGIF2	CD14+ Monocyte	0.00447162	-0.000538181	-0.00514059	-0.00245655	-0.00141144	0.00120833	-0.00837513	0.000691308	-0.00978811	0.0898353	0.221526	0.306762	0.0371874	0.24062	0.306762	0.111562	0.306762
MA0523.1_TCF7L2	CD14+ Monocyte	0.0043746	-0.0023088	-0.00252818	0.0070692	-0.00233438	-0.00225762	-0.00365092	-0.00336945	-0.000798195	0.0914347	0.222936	0.0517542	0.0597191	0.982336	0.0895787	0.0895787	0.982336
MA0724.1_VENTX	CD14+ Monocyte	-0.00691563	0.00182081	0.000237519	-0.0189893	0.00245149	0.00055944	-0.00748139	0.00266225	0.00255461	0.0933159	0.224995	0.0229142	0.152437	0.579915	0.0687425	0.228656	0.579915
MA0662.1_MIXL1	CD14+ Monocyte	0.000730195	-0.000190425	0.00588028	-0.00655973	-0.0002876	3.92458e-06	0.00814934	0.0011325	0.00990664	0.0975514	0.230704	0.716859	0.200423	0.0354365	0.716859	0.300635	0.106309
MA0685.1_SP4	CD14+ Monocyte	-0.00197247	0.00500352	0.00486744	0.00131564	0.00677541	0.00145972	0.00691454	0.000839371	0.00820211	0.09781	0.230704	0.0926813	0.042003	0.876835	0.139022	0.126009	0.876835
MA0674.1_NKX6-1	CD14+ Monocyte	0.000213021	-0.00241604	0.00472029	-0.00795958	-0.00466189	0.00207567	0.00126606	0.001836	0.0103881	0.101906	0.237781
MA0641.1_ELF4	CD14+ Monocyte	-0.000186192	-0.006088	0.00039232	-0.00799126	-0.00692525	-0.0044135	-0.00453955	-0.000302464	0.00449081	0.103194	0.238224
MA0073.1_RREB1	CD14+ Monocyte	0.00150164	0.00171108	-0.00403672	0.000918988	0.00261166	-9.00803e-05	0.000475795	-0.00345001	-0.00772956	0.104679	0.239109
MA0795.1_SMAD3	CD14+ Monocyte	-0.00830325	0.00567399	-0.0127325	0.00531522	0.00413386	0.00875425	-0.00463774	-0.0152404	-0.015203	0.108707	0.245723
MA0665.1_MSC	CD14+ Monocyte	0.00410788	-0.00156879	-0.00292539	-0.00197072	-0.00322604	0.00174571	-0.00351551	-0.001769	-0.0038811	0.110823	0.247923
MA0689.1_TBX20	CD14+ Monocyte	0.00398173	0.00174936	-0.00285594	-0.00213941	0.00266921	-9.03304e-05	-0.00660905	0.00112271	-0.00499563	0.112996	0.250206
MA0777.1_MYBL2	CD14+ Monocyte	-0.00247008	-0.00827205	0.000555075	-0.0116816	-0.0079463	-0.00892353	-0.00969633	-0.000218754	0.00829214	0.119782	0.262552
MA0163.1_PLAG1	CD14+ Monocyte	0.000958724	0.00242578	-0.00131902	-0.00278883	0.00318439	0.000908561	0.00181651	-0.00161961	-0.00305868	0.122178	0.265127
MA0780.1_PAX3	CD14+ Monocyte	-0.00765923	0.0046048	0.00561825	-0.00460768	0.00376767	0.00627905	-0.000459948	0.00181412	0.0141085	0.127201	0.273294
MA0668.1_NEUROD2	CD14+ Monocyte	0.00483547	-0.00341226	-0.00118878	-0.011093	-0.00432762	-0.00158153	-0.00930682	0.000381348	0.00239142	0.134651	0.286463
MA0691.1_TFAP4	CD14+ Monocyte	0.00345134	-0.00274162	-0.00336047	-0.0030243	-0.00391209	-0.000400691	-0.00222628	-0.00200376	-0.00569943	0.137755	0.290222
MA0464.2_BHLHE40	CD14+ Monocyte	-0.019045	-0.0113209	-0.0030954	-0.0185617	-0.0118611	-0.0102406	-0.0135983	0.00283596	-0.00301343	0.143455	0.299324
MA0115.1_NR1H2::RXRA	CD14+ Monocyte	0.00178621	0.00205994	-0.00198283	-0.00851356	0.0046892	-0.00319859	-0.00370001	-0.0005986	-0.00245298	0.144874	0.299406
MA0771.1_HSF4	CD14+ Monocyte	0.00303002	-0.00261484	-0.000964077	-0.00439869	-0.00353551	-0.000773516	-0.00111981	-0.000846306	-0.000997657	0.147635	0.302235
MA0071.1_RORA	CD14+ Monocyte	0.0029651	-0.000764499	-0.00563595	-0.002106	0.001284	-0.0048615	-0.0115092	-0.00221894	-0.005707	0.152991	0.305955
MA0661.1_MEOX1	CD14+ Monocyte	-0.00318195	0.00159722	0.00482313	-0.00574715	0.000820526	0.00315059	0.00789184	0.000927425	0.0073223	0.153618	0.305955
MA0669.1_NEUROG2	CD14+ Monocyte	0.00355896	-0.00394844	-0.00478344	0.00153993	-0.00464608	-0.00255316	-0.00613036	-0.00223799	-0.00685519	0.155067	0.305955
MA0763.1_ETV3	CD14+ Monocyte	-0.00368767	-0.0062067	0.00243108	-0.0124179	-0.00856903	-0.00148206	-0.00247095	0.00279444	0.00527517	0.155093	0.305955
MA0155.1_INSM1	CD14+ Monocyte	0.00153303	0.00165662	-0.0020265	6.07065e-05	0.00185357	0.00126272	-0.000198343	-0.00197637	-0.00330375	0.173795	0.339761
MA0139.1_CTCF	CD14+ Monocyte	-0.0114048	0.00951388	0.0201322	0.00581226	0.00921659	0.0101085	0.00545363	0.00563195	0.046835	0.182604	0.3491
MA0760.1_ERF	CD14+ Monocyte	0.000685478	-0.00575535	-0.00339016	-0.00980498	-0.00876183	0.0002576	-0.00738668	-0.00136247	-0.00309145	0.182948	0.3491
MA0894.1_HESX1	CD14+ Monocyte	-0.00433792	-0.000565783	0.00167353	-0.00382383	-0.00154765	0.00139795	-0.00224599	-0.00076822	0.00713526	0.184064	0.3491
MA0666.1_MSX1	CD14+ Monocyte	-0.00557885	0.000115029	-0.000397216	-0.00375624	0.000514237	-0.000683386	-0.00612159	-0.00283566	0.00626388	0.186616	0.3491
MA0708.1_MSX2	CD14+ Monocyte	-0.00557885	0.000115029	-0.000397216	-0.00375624	0.000514237	-0.000683386	-0.00612159	-0.00283566	0.00626388	0.186616	0.3491
MA0636.1_BHLHE41	CD14+ Monocyte	-0.0167519	-0.0118746	-0.00235478	-0.0176731	-0.0117512	-0.0121215	-0.00664827	0.000922521	-0.00331597	0.189107	0.349511
MA0690.1_TBX21	CD14+ Monocyte	-0.00379016	0.00280235	9.67916e-05	-0.00766451	0.00412545	0.000156132	-0.00109398	0.001269	-0.000476945	0.190057	0.349511
MA0076.2_ELK4	CD14+ Monocyte	4.30308e-05	-0.00559244	-0.00145815	-0.012281	-0.00728237	-0.00221256	-0.00688625	0.000136449	0.000300222	0.196913	0.359077
MA0152.1_NFATC2	CD14+ Monocyte	0.00244964	-0.00357686	0.000992882	-0.00533607	-0.00528044	-0.000169696	-5.61394e-05	-0.00011988	0.00299045	0.199413	0.360175
MA0160.1_NR4A2	CD14+ Monocyte	0.00299564	0.000916908	-0.00606298	-0.00096156	0.00288912	-0.00302752	-0.00915169	-0.00106219	-0.00983808	0.200835	0.360175
MA0140.2_GATA1::TAL1	CD14+ Monocyte	0.000776311	0.000352354	-0.003467	0.0020701	-0.000246154	0.00154937	-0.00358099	-0.0021977	-0.00487186	0.203166	0.361369
MA0639.1_DBP	CD14+ Monocyte	-0.00797607	-0.00529851	0.00430027	-0.0102934	-0.00743603	-0.00102348	-0.00320977	0.0108104	0.00171178	0.218685	0.38581
MA0258.2_ESR2	CD14+ Monocyte	0.00477632	0.00129829	-0.00665955	0.000828292	0.0010917	0.00171148	-0.00585361	-0.00174921	-0.0129256	0.226356	0.396124
MA0105.4_NFKB1	CD14+ Monocyte	8.57321e-05	0.00889802	-0.00705843	0.00168357	0.0110175	0.00465914	0.00312853	-0.00379841	-0.0176531	0.22875	0.39711
MA0630.1_SHOX	CD14+ Monocyte	-0.000287828	-0.00310772	0.0034872	-0.0101852	-0.00404556	-0.00123204	-0.000609465	0.000435488	0.00977865	0.232938	0.398012
MA0717.1_RAX2	CD14+ Monocyte	-0.000287828	-0.00310772	0.0034872	-0.0101852	-0.00404556	-0.00123204	-0.000609465	0.000435488	0.00977865	0.232938	0.398012
MA0649.1_HEY2	CD14+ Monocyte	-0.0116404	-0.00408334	-0.00322002	-0.0110623	-0.00267061	-0.00690879	-0.00780645	0.00329579	-0.00776418	0.246312	0.417575
MA0670.1_NFIA	CD14+ Monocyte	0.00153374	-0.000968733	-0.00504258	-0.00398825	-0.00376351	0.00462081	-0.0103399	-0.00131691	-0.00585768	0.250488	0.421364
MA0098.3_ETS1	CD14+ Monocyte	-0.000336013	-0.0062887	-0.00153323	-0.0119815	-0.00882579	-0.00121452	-0.00583113	0.000594718	-0.00115055	0.254823	0.425358
MA0845.1_FOXB1	CD14+ Monocyte	-0.0019558	0.00420851	0.00510356	0.00117764	0.00423606	0.00415342	-0.00176525	0.00176708	0.0135753	0.259082	0.429166
MA0675.1_NKX6-2	CD14+ Monocyte	-0.00056611	-0.00192189	0.00303915	-0.00657574	-0.00378008	0.00179449	-0.000571377	0.000985411	0.0078422	0.262702	0.431866
MA0741.1_KLF16	CD14+ Monocyte	-0.000188065	0.00288329	0.00139512	0.0021091	0.00397382	0.000702254	0.00518856	-0.00105578	0.00172553	0.272059	0.443887
MA0106.3_TP53	CD14+ Monocyte	-0.010363	-0.00381707	-0.00394688	0.000105281	-0.00494037	-0.00157047	-0.00513277	0.00121595	-0.00917958	0.274346	0.444277
MA0818.1_BHLHE22	CD14+ Monocyte	-0.0067994	-0.00180218	0.000467726	-0.00468214	-0.00157151	-0.00226354	0.00113728	0.00277309	-0.00266823	0.282356	0.452117
MA0486.2_HSF1	CD14+ Monocyte	0.00173544	-0.00275343	-0.000501694	-0.00607486	-0.00424171	0.000223136	-1.61855e-05	-0.0014469	0.000277379	0.283355	0.452117
MA0759.1_ELK3	CD14+ Monocyte	-0.00357307	-0.00585507	0.001041	-0.012916	-0.00801157	-0.00154208	-0.00452859	0.00111309	0.00466994	0.286005	0.453015
MA0672.1_NKX2-3	CD14+ Monocyte	-0.00458673	-0.00249024	-0.00109701	0.000118882	-0.00343637	-0.000597987	-0.00550717	-0.000912368	0.00162767	0.290144	0.454011
MA0642.1_EN2	CD14+ Monocyte	-0.00506194	0.000521936	0.00160669	0.00143169	0.000450782	0.000664243	0.00628754	-0.00147135	0.00207718	0.290818	0.454011
MA0825.1_MNT	CD14+ Monocyte	-0.0108475	-0.00633736	-0.00297	-0.00551889	-0.00502755	-0.00895697	-0.0126511	0.00174526	-0.00201703	0.295801	0.458491
MA0476.1_FOS	CD14+ Monocyte	0.017366	-0.0345724	-0.0213022	-0.0162938	-0.0568946	0.0100721	-0.0369612	0.00506321	-0.0416225	0.300857	0.463
MA0655.1_JDP2	CD14+ Monocyte	0.0164573	-0.0344241	-0.0199214	-0.0173261	-0.0573363	0.0114003	-0.0407672	0.00790159	-0.0384844	0.302977	0.463
MA0017.2_NR2F1	CD14+ Monocyte	-0.00377919	0.000357743	-0.000502815	-0.0115006	0.00240488	-0.00373653	-0.00330906	0.00560313	-0.00575559	0.313341	0.464184
MA0663.1_MLX	CD14+ Monocyte	-0.0122795	-0.0101981	-0.00293151	-0.0153013	-0.0110139	-0.00856651	-0.00454824	-0.000841797	-0.00429169	0.313403	0.464184
MA0478.1_FOSL2	CD14+ Monocyte	0.0166403	-0.0331597	-0.0235945	-0.0167911	-0.0559816	0.0124841	-0.040596	0.00408428	-0.044552	0.313415	0.464184
MA0694.1_ZBTB7B	CD14+ Monocyte	-0.00488271	-0.000587172	-0.00173792	-0.00256242	-0.000289948	-0.00118162	-0.00166315	-0.000981403	-0.00267037	0.314088	0.464184
MA0113.3_NR3C1	CD14+ Monocyte	-0.00584432	-0.0027079	-0.00708438	-0.00509671	-0.0039817	-0.000160289	-0.0105539	-0.00362108	-0.0088119	0.314447	0.464184
MA0823.1_HEY1	CD14+ Monocyte	-0.00894827	-0.00199215	-0.00289134	-0.00639723	-0.00181953	-0.0023374	-0.00675283	0.00130104	-0.00520813	0.3168	0.464498
MA0088.2_ZNF143	CD14+ Monocyte	-0.00279394	0.00139983	0.00333475	0.00227123	0.0019095	0.000380499	0.0031874	0.00206843	0.00491036	0.32986	0.4804
MA0599.1_KLF5	CD14+ Monocyte	0.00194242	0.00128956	-0.000459839	0.000739347	0.00241506	-0.00096145	0.00437371	-0.0015191	-0.0024464	0.336744	0.483437
MA0647.1_GRHL1	CD14+ Monocyte	-0.00210364	-0.00143743	0.0010959	-0.00516635	-0.00146087	-0.00139054	-0.000781381	3.88896e-05	0.00358061	0.336744	0.483437
MA0525.2_TP63	CD14+ Monocyte	-0.00498583	-0.00229407	-0.00178011	-0.000554754	-0.00203544	-0.00281134	0.000648011	0.00261481	-0.00852627	0.338629	0.483437
MA0903.1_HOXB3	CD14+ Monocyte	0.00355537	-0.00105687	0.00113178	-0.00528386	-0.00425621	0.00534181	0.00416371	0.00121465	-0.000986199	0.347994	0.49356
MA0844.1_XBP1	CD14+ Monocyte	-0.00802311	0.00182077	-0.00442618	-0.00866322	0.000597653	0.00426701	-0.00579929	0.0025038	-0.0115957	0.358779	0.505552
MA0664.1_MLXIPL	CD14+ Monocyte	-0.0147341	-0.0127934	-0.00362943	-0.0190257	-0.0132041	-0.0119719	-0.00576362	0.000107256	-0.00656611	0.382727	0.535818
MA0804.1_TBX19	CD14+ Monocyte	-0.00194027	-0.00657445	-0.00103177	-0.00535133	-0.0068069	-0.00610955	0.00272527	0.000791256	-0.00566334	0.389908	0.542372
MA0498.2_MEIS1	CD14+ Monocyte	-0.00351329	-0.00215148	-0.000514747	-0.00400324	-0.00363014	0.000805826	0.000667446	7.82206e-05	-0.00199467	0.402527	0.552233
MA0841.1_NFE2	CD14+ Monocyte	0.0125393	-0.0323448	-0.0212189	-0.0130112	-0.052697	0.00835939	-0.0456873	0.00829982	-0.0393451	0.403535	0.552233
MA0488.1_JUN	CD14+ Monocyte	-0.00713263	-0.000917169	0.000940678	-0.0139183	-0.00339617	0.00404084	-0.00692291	0.00985664	-0.00421889	0.404632	0.552233
MA0796.1_TGIF1	CD14+ Monocyte	-0.000383526	0.00150777	-0.00394353	-0.0040635	0.00221369	9.59092e-05	-0.00518159	7.27421e-05	-0.0078038	0.41561	0.56367
MA0513.1_SMAD2::SMAD3::SMAD4	CD14+ Monocyte	0.00101508	0.000711809	-0.00626718	-0.00286705	-0.00114727	0.00442998	-0.00113434	-0.00380002	-0.0125674	0.434488	0.585615
MA0474.2_ERG	CD14+ Monocyte	-0.000522201	-0.00519304	-0.00216657	-0.0114954	-0.00778721	-4.70545e-06	-0.00564237	-0.00126337	-0.000903096	0.438913	0.587927
MA0667.1_MYF6	CD14+ Monocyte	-0.00109636	-3.98667e-05	-0.00347312	-0.00248414	-0.000240904	0.000362209	-0.00457245	-0.00182207	-0.00466647	0.444404	0.591629
MA0074.1_RXRA::VDR	CD14+ Monocyte	-0.00181071	0.000848956	-0.0035684	-0.0039525	0.00294293	-0.00333898	0.00348308	-0.00090129	-0.011381	0.45466	0.601593
MA0770.1_HSF2	CD14+ Monocyte	0.000605427	-0.00315783	-0.000239662	-0.0090764	-0.0045171	-0.000439307	0.000992627	0.000743383	-0.00220807	0.458819	0.603417
MA0625.1_NFATC3	CD14+ Monocyte	0.00395714	-0.00120826	-0.000351457	-0.00612608	-0.00194875	0.000272699	0.00125154	-0.00226505	0.00081241	0.471063	0.615676
MA0475.2_FLI1	CD14+ Monocyte	-0.00126285	-0.0048562	-0.000772885	-0.0124828	-0.00729171	1.48259e-05	-0.00333994	0.000581372	-0.000641479	0.473815	0.615676
MA0678.1_OLIG2	CD14+ Monocyte	-0.00651226	-0.00519344	-0.00228672	-0.00124847	-0.0057597	-0.00406093	-0.00949878	-0.00203733	0.00223036	0.484577	0.625912
MA0119.1_NFIC::TLX1	CD14+ Monocyte	-0.0025685	-0.00723174	-0.00286764	-0.00863133	-0.00938146	-0.00293229	-0.00347585	0.00228271	-0.00847091	0.493891	0.634167
MA0785.1_POU2F1	CD14+ Monocyte	-0.00189545	0.000248982	0.0010278	-0.00465927	-0.000219128	0.0011852	-0.00164525	0.00139362	0.00238304	0.520116	0.660244
MA0638.1_CREB3	CD14+ Monocyte	-0.00812148	-0.00433392	-0.00227426	-0.0113365	-0.0068161	0.000630448	-0.005974	0.0033944	-0.0064212	0.521059	0.660244
MA0843.1_TEF	CD14+ Monocyte	-0.00798573	-0.00610053	0.00446787	-0.0128016	-0.00705631	-0.00418896	-0.00726355	0.0117993	0.00373546	0.523327	0.660244
MA0066.1_PPARG	CD14+ Monocyte	0.00139856	-0.000836285	-0.00570188	-0.00384855	-0.00278243	0.003056	-0.00489318	2.77334e-05	-0.0129256	0.542777	0.675571
MA0031.1_FOXD1	CD14+ Monocyte	-0.00330452	-0.00633602	-0.00326653	0.000128972	-0.00679691	-0.00541423	-0.00848033	0.00223374	-0.00620765	0.545099	0.675571
MA0157.2_FOXO3	CD14+ Monocyte	-0.00330452	-0.00633602	-0.00326653	0.000128972	-0.00679691	-0.00541423	-0.00848033	0.00223374	-0.00620765	0.545099	0.675571
MA0731.1_BCL6B	CD14+ Monocyte	0.00246179	0.000535092	-0.00136281	0.0037772	-0.00046089	0.00252706	0.00301486	-0.00335392	-0.0019583	0.547929	0.675571
MA0501.1_MAF::NFE2	CD14+ Monocyte	0.0013955	-0.0170113	-0.00820133	-0.00888153	-0.0257689	0.00050401	-0.023871	0.00890922	-0.0177172	0.554936	0.680345
MA0819.1_CLOCK	CD14+ Monocyte	-0.000864937	-0.00645619	-0.00513615	0.00222933	-0.00571609	-0.00793641	-0.00422858	0.000593229	-0.0124255	0.565869	0.687551
MA0855.1_RXRB	CD14+ Monocyte	0.000538187	-0.00087188	-0.00304025	-0.00488842	0.00052023	-0.0036561	-0.00476161	-0.000441845	-0.00492414	0.567151	0.687551
MA0595.1_SREBF1	CD14+ Monocyte	-0.00379442	-0.000569035	-0.00653828	-0.00508454	-0.00164839	0.00158968	-0.00564518	-0.00208085	-0.012334	0.570897	0.688248
MA0058.3_MAX	CD14+ Monocyte	-0.00846322	-0.00489878	-0.00244479	0.000236408	-0.00192247	-0.0108514	-0.00871526	0.00132468	-0.00266218	0.583045	0.696856
MA0710.1_NOTO	CD14+ Monocyte	0.00337809	-0.00131333	0.00402387	-0.010312	-0.0017951	-0.00034978	0.0118616	0.00213591	0.00100133	0.585435	0.696856
MA0895.1_HMBOX1	CD14+ Monocyte	-0.00329748	-0.000666668	0.000266489	0.000182917	0.00102218	-0.00404436	0.016198	0.00022103	-0.0103015	0.587671	0.696856
MA0793.1_POU6F2	CD14+ Monocyte	-0.00138953	-0.000459701	0.00194526	-0.00317359	-0.00184364	0.00230818	0.00174251	0.000570886	0.00368388	0.594478	0.699317
MA0738.1_HIC2	CD14+ Monocyte	-0.00422923	-0.00121802	-0.00111359	-0.00528305	-0.00161562	-0.000422818	-0.00360764	0.00251013	-0.00367858	0.598116	0.699317
MA0800.1_EOMES	CD14+ Monocyte	0.00045195	0.00256559	5.89178e-05	-0.00812238	0.00392694	-0.000157102	-0.00159114	0.000773568	0.000325197	0.599455	0.699317
MA0138.2_REST	CD14+ Monocyte	-0.00259977	-0.000861503	0.00019687	-0.00254791	-0.00269728	0.00281004	-0.00195467	0.000733586	0.00100506	0.602637	0.699317
MA0083.3_SRF	CD14+ Monocyte	0.000863516	-0.00290647	-0.00597495	-0.00240737	-0.00330589	-0.00210763	0.0018937	-0.00322361	-0.0144306	0.61543	0.710364
MA0634.1_ALX3	CD14+ Monocyte	0.00206601	0.00161893	0.0050834	-0.00533103	0.00219764	0.000461503	0.00360362	0.000498204	0.0114193	0.626326	0.715678
MA0472.2_EGR2	CD14+ Monocyte	-0.00109374	0.000923747	0.000708088	-8.58716e-05	0.0028977	-0.00302417	0.0041291	-0.00161529	0.00113802	0.626947	0.715678
MA0786.1_POU3F1	CD14+ Monocyte	0.000127051	0.00179096	0.00224875	-0.00199534	0.002025	0.00132288	-0.00111257	0.00154496	0.00531071	0.629928	0.715678
MA0737.1_GLIS3	CD14+ Monocyte	-0.0027432	-0.00120313	-0.00586894	-0.00774256	-0.000355455	-0.00289847	-0.00264414	-0.00483639	-0.00922344	0.634833	0.717494
MA0788.1_POU3F3	CD14+ Monocyte	0.000323917	0.00154899	0.00280999	-0.00168129	0.000418227	0.00381051	0.00319724	0.00103052	0.00462787	0.646123	0.723263
MA0863.1_MTF1	CD14+ Monocyte	-0.00273585	6.3845e-05	-0.00376699	-0.00706215	0.000439488	-0.000687441	-0.00176608	-0.0025943	-0.00646907	0.646604	0.723263
MA0613.1_FOXG1	CD14+ Monocyte	-0.00231907	-0.00292206	-0.00114761	0.000253924	-0.00299104	-0.00278411	-0.000348772	-0.000200004	-0.0027857	0.663092	0.737903
MA0596.1_SREBF2	CD14+ Monocyte	-0.00456	5.60827e-07	-0.00473828	-0.00729664	-0.000970898	0.00194348	-0.0051516	-0.000791769	-0.009067	0.675387	0.746275
MA0628.1_POU6F1	CD14+ Monocyte	-0.00321449	0.000275947	0.00231126	-0.0101947	-0.00418121	0.00919027	0.00302216	0.000422957	0.00404034	0.677494	0.746275
MA0792.1_POU5F1B	CD14+ Monocyte	-0.00178778	0.00155715	0.00122081	-0.00248227	0.0023585	-4.5549e-05	-0.00140683	0.000810964	0.00345073	0.700951	0.768214
MA0727.1_NR3C2	CD14+ Monocyte	-0.00730759	-0.00541624	-0.00487727	-0.000825976	-0.00742283	-0.00140305	-0.00544249	-0.00152353	-0.00841316	0.707409	0.771396
MA0479.1_FOXH1	CD14+ Monocyte	0.00440291	-0.000578409	-0.000412427	0.00580369	4.24819e-05	-0.00182019	0.00180089	0.000326071	-0.00274955	0.72099	0.780218
MA0713.1_PHOX2A	CD14+ Monocyte	0.00014668	0.00416747	0.00412593	0.0106282	0.00362949	0.00524342	0.000757322	0.00070564	0.010362	0.722691	0.780218
MA0775.1_MEIS3	CD14+ Monocyte	-0.0031697	-0.00269608	7.06205e-05	-0.00239504	-0.00358624	-0.000915767	0.00343532	0.00143516	-0.00376448	0.728953	0.783083
MA0698.1_ZBTB18	CD14+ Monocyte	-0.000871593	-0.00219018	-0.0041834	-0.000460941	-0.00540454	0.00423854	-0.00298177	-0.000961713	-0.00874313	0.758499	0.810809
MA0733.1_EGR4	CD14+ Monocyte	0.00194252	0.00238353	0.000941279	0.00615014	0.00438323	-0.00161588	0.00580982	-0.00206735	0.00120565	0.772096	0.821298
MA0692.1_TFEB	CD14+ Monocyte	-0.0119365	-0.00925235	-0.00640723	-0.00920837	-0.00757879	-0.0125995	-0.0112659	-0.00163964	-0.00873031	0.779353	0.824974
MA0732.1_EGR3	CD14+ Monocyte	2.2974e-05	0.000421111	0.00102402	0.00261805	0.00146686	-0.00167038	0.00424347	-0.000706533	0.000896695	0.795592	0.838075
MA0048.2_NHLH1	CD14+ Monocyte	-0.000942768	-0.00190176	-0.00322603	-0.00427407	-0.00274539	-0.000214484	-0.00235966	-0.000680382	-0.00677354	0.832751	0.872981
MA0042.2_FOXI1	CD14+ Monocyte	-0.00405506	-0.00465635	-0.00310134	0.00219816	-0.00490413	-0.00416079	-0.00734893	0.000859852	-0.004891	0.870195	0.894939
MA0848.1_FOXO4	CD14+ Monocyte	-0.00405506	-0.00465635	-0.00310134	0.00219816	-0.00490413	-0.00416079	-0.00734893	0.000859852	-0.004891	0.870195	0.894939
MA0849.1_FOXO6	CD14+ Monocyte	-0.00405506	-0.00465635	-0.00310134	0.00219816	-0.00490413	-0.00416079	-0.00734893	0.000859852	-0.004891	0.870195	0.894939
MA0850.1_FOXP3	CD14+ Monocyte	-0.00405506	-0.00465635	-0.00310134	0.00219816	-0.00490413	-0.00416079	-0.00734893	0.000859852	-0.004891	0.870195	0.894939
MA0059.1_MAX::MYC	CD14+ Monocyte	-0.00427397	-0.00492873	-0.00275777	-0.00152351	-0.00239103	-0.0100041	-0.0056212	-1.09491e-05	-0.00405345	0.895631	0.916755
MA0839.1_CREB3L1	CD14+ Monocyte	-0.000943471	-0.00145862	-0.00241982	-0.00585787	-0.00344258	0.00250931	-0.00790978	0.00245263	-0.00444437	0.902513	0.919462
MA0805.1_TBX1	CD14+ Monocyte	-0.00212954	0.00176791	-0.000824416	-0.00850302	0.00219509	0.000913554	-0.0057162	0.00291748	-0.00192877	0.912884	0.925682
MA0774.1_MEIS2	CD14+ Monocyte	-0.00100606	-0.00159362	-0.00200854	-0.000479912	-0.00283233	0.000883807	-0.00215304	0.000240767	-0.00453639	0.970661	0.979691
MA0736.1_GLIS2	CD14+ Monocyte	-0.00139114	-0.000503879	-0.00112315	-0.00378179	0.00096891	-0.00344946	0.00472253	-0.000630602	-0.00559492	0.976057	0.980576
MA0826.1_OLIG1	CD14+ Monocyte	-0.0017695	-0.000474237	-0.00172899	-0.0101692	0.00143486	-0.00429244	-0.00832091	0.00305419	-0.00291476	0.996304	0.996304
MA0136.2_ELF5	CD16+ Monocyte	0.0164925	-0.00714712	-0.00320149	0.0110305	-0.0117666	0.00209185	-0.00814351	-0.000531546	-0.00302174	6.88646e-06	0.00133597	8.73393e-05	2.20832e-05	0.0598453	0.000131009	6.62496e-05	0.0598453
MA0051.1_IRF2	CD16+ Monocyte	-0.0170216	-0.0254601	0.019271	-0.0272272	-0.0223936	-0.0315933	0.0154697	0.0116873	0.0306529	8.0529e-05	0.00492111	0.575157	0.00170045	8.8974e-05	0.575157	0.00255068	0.000266922
MA0687.1_SPIC	CD16+ Monocyte	0.0197278	-0.00533715	-0.00626516	0.0186264	-0.0100704	0.00412934	-0.00635663	-0.0027727	-0.0102787	9.24601e-05	0.00492111	0.00109877	2.75891e-05	0.876835	0.00164816	8.27672e-05	0.876835
MA0050.2_IRF1	CD16+ Monocyte	-0.00428875	-0.0100125	0.0071573	-0.00764369	-0.0100383	-0.00996106	0.00650954	0.00607683	0.0088497	0.000104451	0.00492111	0.0926813	0.00722664	8.8974e-05	0.0926813	0.01084	0.000266922
MA0652.1_IRF8	CD16+ Monocyte	-0.0261207	-0.029949	0.0243089	-0.0376089	-0.0246693	-0.0405085	0.0171298	0.0145668	0.0404607	0.000132719	0.00492111	0.869066	0.00120151	0.000217783	0.869066	0.00180226	0.000653348
MA0762.1_ETV2	CD16+ Monocyte	0.0130505	-0.00525686	-0.00222026	0.00978533	-0.00833891	0.000907253	-0.0049285	-0.00037988	-0.00256189	0.000152199	0.00492111	0.00068426	0.000150146	0.277976	0.00102639	0.000450437	0.277976
MA0653.1_IRF9	CD16+ Monocyte	-0.0212624	-0.0276804	0.0199762	-0.0292541	-0.021062	-0.0409173	0.0178332	0.0130983	0.0294292	0.000210947	0.00584625	0.575157	0.00281293	0.000217783	0.575157	0.0042194	0.000653348
MA0645.1_ETV6	CD16+ Monocyte	0.0128372	-0.00415184	-0.00454604	0.0112039	-0.00843085	0.00440619	-0.00888903	-3.89096e-05	-0.00690904	0.000262432	0.00632268	0.00334362	5.30252e-05	0.520827	0.00501543	0.000159076	0.520827
MA0772.1_IRF7	CD16+ Monocyte	-0.0178869	-0.0234814	0.0186859	-0.0253039	-0.0198897	-0.0306648	0.0163227	0.0122784	0.0277368	0.00029332	0.00632268	0.409811	0.00201581	0.000508879	0.409811	0.00302371	0.00152664
MA0805.1_TBX1	CD16+ Monocyte	-0.0125092	0.00388033	-0.00256485	-0.0160358	0.00574515	0.000150684	0.000322153	-0.00190975	-0.00525382	0.000356912	0.0069241	0.000194929	0.0129414	0.0354365	0.000584786	0.0194121	0.0354365
MA0501.1_MAF::NFE2	CD16+ Monocyte	-0.0261178	0.0163027	-0.00722141	-0.0246489	0.0221641	0.00457977	-0.00913764	0.00588706	-0.0212371	0.000430212	0.00758737	0.00068426	0.0195566	0.00958579	0.00205278	0.0195566	0.0143787
MA0517.1_STAT1::STAT2	CD16+ Monocyte	-0.00804852	-0.0137025	0.0080118	-0.0139522	-0.0141353	-0.0128367	0.00967215	0.00521844	0.0101638	0.000765881	0.0122321	0.306762	0.0170811	0.000364412	0.306762	0.0256216	0.00109323
MA0820.1_FIGLA	CD16+ Monocyte	-0.0171033	0.00301799	0.00300191	-0.0171906	0.00436399	0.000325972	0.00507986	0.0026391	0.00203989	0.000835443	0.0122321	0.00109877	0.000840983	0.947043	0.00164816	0.00164816	0.947043
MA0821.1_HES5	CD16+ Monocyte	-0.0156846	0.00398256	0.000469435	-0.00769455	0.00257171	0.00680426	-0.000101082	0.00913565	-0.00926081	0.000882729	0.0122321	0.000868861	0.00170045	0.387877	0.00255068	0.00255068	0.387877
MA0711.1_OTX1	CD16+ Monocyte	-0.0194572	-0.00905282	0.0083524	-0.0142374	-0.0127691	-0.00162028	0.00898143	0.00844138	0.00782923	0.00104576	0.0135252	0.306762	0.00331122	0.00208737	0.306762	0.00496683	0.00496683
MA0464.2_BHLHE40	CD16+ Monocyte	-0.0152306	0.00314767	0.00329714	-0.0210161	0.00169124	0.00606051	0.0045514	0.00835611	-0.00344117	0.00120402	0.0145988	0.00216857	0.000840983	1	0.00325285	0.00252295	1
MA0137.3_STAT1	CD16+ Monocyte	-0.00787849	-0.00145759	0.00502911	-0.0128245	-0.00243427	0.000495775	-0.00102424	0.00678569	0.00701534	0.00134924	0.0153972	0.0443138	0.00201581	0.0158088	0.0443138	0.00604743	0.0237132
MA0641.1_ELF4	CD16+ Monocyte	0.00715252	-0.00806013	0.00359356	0.00112565	-0.0106695	-0.00284143	-0.00335139	0.00506576	0.00650595	0.00152158	0.0163992	0.000868861	0.352952	0.005648	0.00260658	0.352952	0.008472
MA0773.1_MEF2D	CD16+ Monocyte	-0.00800246	-0.00118441	0.00718489	-0.00850666	-0.00104143	-0.00147037	0.0077061	0.00518636	0.00916904	0.00172643	0.0166897	0.0697861	0.00170045	0.0225805	0.0697861	0.00510136	0.0338708
MA0497.1_MEF2C	CD16+ Monocyte	-0.00601506	-0.00102306	0.00564063	-0.00550611	-0.000314303	-0.00244057	0.00406241	0.00531749	0.00706979	0.00174538	0.0166897	0.0517542	0.00201581	0.0225805	0.0517542	0.00604743	0.0338708
MA0686.1_SPDEF	CD16+ Monocyte	0.00514599	-0.00760732	0.0075207	-0.00657158	-0.0092887	-0.00424456	0.00410878	0.00782443	0.00944095	0.00183072	0.0166897	0.0111292	0.74415	0.000705386	0.0166938	0.74415	0.00211616
MA0140.2_GATA1::TAL1	CD16+ Monocyte	0.0107086	-0.00280834	-0.00406042	-0.00417617	-0.0012158	-0.00599341	-0.00371812	-0.00326265	-0.00521935	0.00189265	0.0166897	0.00412677	0.0010064	0.911853	0.00619016	0.0030192	0.911853
MA0741.1_KLF16	CD16+ Monocyte	-0.00426939	0.000695987	0.00129387	-0.00450405	0.00140186	-0.000715766	0.0030264	-0.000544315	0.0022834	0.00238026	0.0192844	0.00757404	0.000840983	1	0.0113611	0.00252295	1
MA0768.1_LEF1	CD16+ Monocyte	-0.00910954	-0.00389716	0.00210173	-0.00287769	-0.000634403	-0.0104227	0.000658089	0.00192351	0.00327209	0.0023857	0.0192844	0.106206	0.0010064	0.0540779	0.106206	0.0030192	0.0811168
MA0755.1_CUX2	CD16+ Monocyte	-0.0248958	0.00248803	0.00923621	-0.0168321	-0.000555327	0.00857473	0.0153212	0.00602894	0.00892136	0.00264446	0.020521	0.0229142	0.000701094	0.364008	0.0343713	0.00210328	0.364008
MA0801.1_MGA	CD16+ Monocyte	-0.00996713	0.00408364	-0.00585557	-0.00714127	0.0060055	0.00023991	-0.00049008	-0.00311565	-0.0126291	0.00309973	0.0231288	0.00138387	0.218646	0.0158088	0.0041516	0.218646	0.0237132
MA0527.1_ZBTB33	CD16+ Monocyte	0.00341225	-0.00673689	0.0102505	-0.00213776	-0.00574254	-0.00872559	0.00790484	0.0105532	0.0114612	0.0034609	0.0248672	0.0697861	0.218646	0.000970591	0.104679	0.218646	0.00291177
MA0778.1_NFKB2	CD16+ Monocyte	-0.0226321	0.0148709	-0.00998735	-0.00829705	0.0156918	0.0132291	-0.00939493	-8.31265e-06	-0.0220245	0.00392403	0.0271879	0.00412677	0.138557	0.0123542	0.0123803	0.138557	0.0185313
MA0076.2_ELK4	CD16+ Monocyte	0.00735041	-0.00456385	0.00176462	0.00120702	-0.00638861	-0.000914336	-0.00340407	0.0023916	0.00447894	0.00429294	0.0287183	0.00216857	0.0832321	0.039489	0.00650571	0.0832321	0.0592335
MA0636.1_BHLHE41	CD16+ Monocyte	-0.0156239	-0.00221919	0.00353904	-0.0233663	-0.00153843	-0.00358069	0.00463849	0.00613171	-0.000218693	0.00456776	0.0287734	0.0229142	0.00238404	0.206948	0.0343713	0.00715213	0.206948
MA0059.1_MAX::MYC	CD16+ Monocyte	-0.00942554	0.00296494	0.00170448	-0.00987614	0.0019967	0.00490141	0.00465248	0.00458337	-0.00361956	0.00459781	0.0287734	0.00507291	0.00331122	0.947043	0.00760937	0.00760937	0.947043
MA0657.1_KLF13	CD16+ Monocyte	-0.00755591	0.00243629	0.00507703	-0.00656287	0.00344402	0.000420835	0.00468932	0.000599685	0.0105591	0.00489717	0.0296891	0.0111292	0.00238404	0.54998	0.0166938	0.00715213	0.54998
MA0095.2_YY1	CD16+ Monocyte	-0.00460932	-0.00435682	0.0105017	-0.0099748	-0.00523789	-0.00259467	0.00633859	0.00754891	0.0167219	0.00543644	0.0313165	0.973699	0.0112259	0.005648	0.973699	0.0168389	0.0168389
MA0066.1_PPARG	CD16+ Monocyte	-0.0109146	0.00619892	-0.00855098	-0.00601906	0.00645235	0.00569205	-0.0105045	-0.00100142	-0.0160565	0.00558448	0.0313165	0.00216857	0.379581	0.0178353	0.00650571	0.379581	0.0267529
MA0692.1_TFEB	CD16+ Monocyte	-0.0165219	-0.000461899	0.00135838	-0.015015	0.00265792	-0.00670153	0.000211097	0.00350314	-0.000378984	0.00564989	0.0313165	0.0160957	0.00201581	0.673998	0.0241435	0.00604743	0.673998
MA0145.3_TFCP2	CD16+ Monocyte	-0.00385148	-0.00208289	0.00827817	-0.00397049	-0.000389791	-0.00546909	0.00829148	0.00379875	0.0134953	0.0060796	0.0319361	0.531045	0.0112259	0.00738457	0.531045	0.0168389	0.0168389
MA0754.1_CUX1	CD16+ Monocyte	-0.0226591	0.00412309	0.0033102	-0.0128924	0.00844768	-0.00452608	-0.0034664	0.0110837	-0.00124115	0.00622998	0.0319361	0.00216857	0.00971542	0.947043	0.00650571	0.0145731	0.947043
MA0825.1_MNT	CD16+ Monocyte	-0.0115232	0.00403536	0.00404142	-0.0155781	0.00206915	0.00796779	-0.000434069	0.00776314	0.00268307	0.00625552	0.0319361	0.00919942	0.00331122	0.947043	0.0137991	0.00993366	0.947043
MA0760.1_ERF	CD16+ Monocyte	0.00950586	-0.00241208	-0.00175681	0.00154488	-0.0052813	0.00332637	-0.00637642	-0.00133343	0.000828992	0.00675199	0.0323351	0.00269819	0.00971542	0.947043	0.00809457	0.0145731	0.947043
MA0637.1_CENPB	CD16+ Monocyte	-0.00929253	-0.00197498	0.00693358	-0.0095353	-0.00605368	0.00618243	-0.000571686	0.0100589	0.0082909	0.00683681	0.0323351	0.276605	0.00331122	0.0439283	0.276605	0.00993366	0.0658925
MA0101.1_REL	CD16+ Monocyte	-0.0255915	0.0146142	-0.0108413	-0.0171433	0.0137975	0.0162477	-0.0143859	-0.00380418	-0.0166881	0.00695195	0.0323351	0.0111292	0.0532274	0.0253401	0.0333877	0.0532274	0.0380102
MA0107.1_RELA	CD16+ Monocyte	-0.0231053	0.0161628	-0.0129171	-0.0170526	0.0125112	0.023466	-0.0194441	-0.00478327	-0.0180552	0.00700038	0.0323351	0.006211	0.152437	0.0200859	0.018633	0.152437	0.0301289
MA0862.1_GMEB2	CD16+ Monocyte	-0.0246293	0.00492257	0.0170689	-0.0330273	-0.00168709	0.0181419	0.00907728	0.0171909	0.0222543	0.00740422	0.0334051	0.0192424	0.00532584	0.206948	0.0288637	0.0159775	0.206948
MA0159.1_RARA::RXRA	CD16+ Monocyte	0.00843431	-0.000712124	-0.0112976	0.00318727	0.00242629	-0.00698896	-0.0093851	-0.00341473	-0.0217691	0.00760871	0.0335475	0.176462	0.00455617	0.0487819	0.176462	0.0136685	0.0731728
MA0131.2_HINFP	CD16+ Monocyte	0.000711014	-0.00521316	0.0046185	-0.00576118	-0.00570556	-0.00422837	0.00435997	0.00413098	0.00535962	0.00823884	0.0346146	0.137913	0.497879	0.00113538	0.20687	0.497879	0.00340615
MA0756.1_ONECUT2	CD16+ Monocyte	-0.013296	0.00216338	0.00295433	-0.00600592	0.00216365	0.00216283	0.00568059	0.00205971	0.00218054	0.00829902	0.0346146	0.0134105	0.00388867	0.842057	0.0201158	0.011666	0.842057
MA0691.1_TFAP4	CD16+ Monocyte	0.000468009	0.00347535	-0.00544847	-0.00996927	0.00369852	0.00302901	-0.00388935	-0.00446332	-0.00763721	0.00854777	0.0346146	0.448279	0.11374	0.00179754	0.448279	0.17061	0.00539261
MA0506.1_NRF1	CD16+ Monocyte	-0.00430925	-0.00802402	0.00596229	-0.0147971	-0.00942388	-0.00522432	0.00267443	0.00723035	0.00667478	0.00870609	0.0346146	0.22252	0.200423	0.00179754	0.22252	0.22252	0.00539261
MA0511.2_RUNX2	CD16+ Monocyte	-0.000563499	0.00387009	-0.0118135	0.00570735	0.00258366	0.00644293	-0.00762954	-0.00530302	-0.0221983	0.00874286	0.0346146	0.306762	0.0223399	0.00842106	0.306762	0.0335098	0.0252632
MA0788.1_POU3F3	CD16+ Monocyte	0.0128529	-0.00484435	0.000944279	-0.00606241	-0.00617202	-0.00218902	0.00488306	-0.00214493	0.0019225	0.00983038	0.0381419	0.00334362	0.0328502	0.277976	0.0100309	0.0492752	0.277976
MA0258.2_ESR2	CD16+ Monocyte	-0.00158436	0.00304458	-0.010798	0.000454678	0.00273977	0.00365421	-0.00939421	-0.00603623	-0.0172892	0.0104135	0.0396123	0.339021	0.0832321	0.003727	0.339021	0.124848	0.011181
MA0685.1_SP4	CD16+ Monocyte	-0.00482244	0.000752781	0.00405535	-0.0071013	0.00193337	-0.00160839	0.00302045	0.001082	0.00821419	0.010884	0.040337	0.0443138	0.00388867	0.341079	0.0664707	0.011666	0.341079
MA0144.2_STAT3	CD16+ Monocyte	-0.00729101	0.000955768	0.00288818	-0.0110039	0.000857255	0.00115279	-0.00304703	0.00446535	0.00500496	0.0111702	0.040337	0.0134105	0.00838882	0.387877	0.0201158	0.0201158	0.387877
MA0738.1_HIC2	CD16+ Monocyte	-0.0074273	0.00189841	-0.00146315	-0.0017447	0.00337732	-0.0010594	-0.000371378	0.00124909	-0.00535529	0.0113491	0.040337	0.00507291	0.0371874	0.206948	0.0152187	0.0557812	0.206948
MA0660.1_MEF2B	CD16+ Monocyte	-0.00938344	-0.00169052	0.00648506	-0.0100669	-0.00153893	-0.00199372	0.0133638	0.00524203	0.00334945	0.0114358	0.040337	0.0271799	0.0129414	0.0968083	0.0407698	0.0388242	0.0968083
MA0732.1_EGR3	CD16+ Monocyte	-0.00298956	0.000229802	0.00226702	-0.00294168	-0.000978356	0.00264612	0.00331329	0.0010379	0.00300347	0.0124202	0.0426874	0.176462	0.00170045	0.319096	0.264693	0.00510136	0.319096
MA0797.1_TGIF2	CD16+ Monocyte	-0.00928327	0.00410336	-0.00407954	-0.00558492	0.0021814	0.00794727	-0.00456523	0.00174403	-0.0105499	0.0127458	0.0426874	0.0111292	0.200423	0.0253401	0.0333877	0.200423	0.0380102
MA0914.1_ISL2	CD16+ Monocyte	0.00611354	-0.00773013	0.0039299	0.00136407	-0.00687977	-0.00943084	0.00978257	0.00247979	0.00171992	0.0127622	0.0426874	0.00507291	0.821245	0.0200859	0.0152187	0.821245	0.0301289
MA0846.1_FOXC2	CD16+ Monocyte	-0.00397605	-0.00275962	0.00486946	0.00377206	-0.00221869	-0.00384146	0.00447861	0.00385459	0.00631406	0.0140199	0.0449871	0.817483	0.0195566	0.0139876	0.817483	0.0293348	0.0293348
MA0649.1_HEY2	CD16+ Monocyte	-0.0127835	0.00437287	-0.0012106	-0.0153313	0.00180574	0.00950713	-0.00242166	0.00514625	-0.00781954	0.0141183	0.0449871	0.00757404	0.0195566	0.465004	0.0227221	0.0293348	0.465004
MA0792.1_POU5F1B	CD16+ Monocyte	0.0146327	-0.00766923	-0.000285271	-0.00568204	-0.00838872	-0.00623027	-0.000597249	-0.00395606	0.0042053	0.0141454	0.0449871	0.006211	0.042003	0.22333	0.018633	0.0630045	0.22333
MA0157.2_FOXO3	CD16+ Monocyte	0.00799308	-0.00539206	0.000998923	0.00112393	-0.00722082	-0.00173453	0.000968542	0.00243622	-0.000657665	0.0154276	0.0480248	0.00919942	0.11374	0.0661139	0.0275983	0.11374	0.0991708
MA0042.2_FOXI1	CD16+ Monocyte	0.00728187	-0.0040055	-0.00136014	0.001491	-0.00391759	-0.00418132	-0.00280516	0.00233891	-0.00471233	0.0163889	0.0480248	0.0160957	0.0223399	0.206948	0.0335098	0.0335098	0.206948
MA0848.1_FOXO4	CD16+ Monocyte	0.00728187	-0.0040055	-0.00136014	0.001491	-0.00391759	-0.00418132	-0.00280516	0.00233891	-0.00471233	0.0163889	0.0480248	0.0160957	0.0223399	0.206948	0.0335098	0.0335098	0.206948
MA0849.1_FOXO6	CD16+ Monocyte	0.00728187	-0.0040055	-0.00136014	0.001491	-0.00391759	-0.00418132	-0.00280516	0.00233891	-0.00471233	0.0163889	0.0480248	0.0160957	0.0223399	0.206948	0.0335098	0.0335098	0.206948
MA0850.1_FOXP3	CD16+ Monocyte	0.00728187	-0.0040055	-0.00136014	0.001491	-0.00391759	-0.00418132	-0.00280516	0.00233891	-0.00471233	0.0163889	0.0480248	0.0160957	0.0223399	0.206948	0.0335098	0.0335098	0.206948
MA0488.1_JUN	CD16+ Monocyte	-0.00820638	0.0093086	0.00214781	-0.0213389	0.00886854	0.0101887	0.00432852	0.0031322	-0.000454468	0.0169568	0.0480248	0.00334362	0.0597191	0.387877	0.0100309	0.0895787	0.387877
MA0478.1_FOSL2	CD16+ Monocyte	-0.0397266	0.0171711	-0.0166078	-0.0231294	0.0203333	0.0108468	-0.0140617	-0.000330052	-0.0372959	0.0172558	0.0480248	0.00757404	0.125672	0.0882301	0.0227221	0.125672	0.125672
MA0841.1_NFE2	CD16+ Monocyte	-0.0351044	0.0185104	-0.0124733	-0.0192181	0.0215862	0.0123589	-0.0104044	0.00592373	-0.0353157	0.0172822	0.0480248	0.00507291	0.138557	0.115958	0.0152187	0.138557	0.138557
MA0507.1_POU2F2	CD16+ Monocyte	0.0141851	-0.00460374	-0.000294495	-0.000662406	-0.00521651	-0.00337821	0.000728554	-0.00155155	0.000490033	0.0173286	0.0480248	0.0111292	0.0254614	0.319096	0.0333877	0.0381921	0.319096
MA0785.1_POU2F1	CD16+ Monocyte	0.0127474	-0.00417364	0.00016915	-0.00108626	-0.00700086	0.00148079	0.00419215	-0.00276773	0.000913512	0.0179174	0.0486218	0.006211	0.0328502	0.492491	0.018633	0.0492752	0.492491
MA0031.1_FOXD1	CD16+ Monocyte	0.00716579	-0.00417052	-0.00136333	0.00157933	-0.0040664	-0.00437877	-0.00300262	0.00223295	-0.00446612	0.0180452	0.0486218	0.0192424	0.0289535	0.150115	0.0434302	0.0434302	0.150115
MA0786.1_POU3F1	CD16+ Monocyte	0.0158756	-0.00497448	-0.000601302	-0.00895307	-0.00642067	-0.0020821	-0.0033379	-0.00081472	0.00147209	0.0183521	0.0487714	0.006211	0.0371874	0.438391	0.018633	0.0557812	0.438391
MA0058.3_MAX	CD16+ Monocyte	-0.00951036	0.00161496	0.00399337	-0.0119824	0.000805336	0.00323422	0.0043611	0.00629436	0.00106372	0.0201514	0.0528294	0.0602125	0.00838882	0.319096	0.0903188	0.0251664	0.319096
MA0513.1_SMAD2::SMAD3::SMAD4	CD16+ Monocyte	-0.00144158	0.0050299	-0.0088178	0.00510939	0.00331863	0.00845246	-0.00951255	-0.00396262	-0.014019	0.0217545	0.0559515	0.22252	0.183335	0.00738457	0.22252	0.22252	0.0221537
MA0071.1_RORA	CD16+ Monocyte	0.00582509	-0.00290088	-0.00710321	0.00210375	-0.000526548	-0.00764954	-0.00661332	-0.00548098	-0.0093224	0.0219767	0.0559515	0.0697861	0.00722664	0.412676	0.104679	0.0216799	0.412676
MA0597.1_THAP1	CD16+ Monocyte	0.000555977	-0.000427819	-0.0056902	0.00231994	0.00050155	-0.00228656	-0.00481216	-0.00420909	-0.00800351	0.0222076	0.0559515	0.817483	0.0195566	0.028387	0.817483	0.0425804	0.0425804
MA0115.1_NR1H2::RXRA	CD16+ Monocyte	0.00199799	0.00165404	-0.00570394	-0.00192445	0.00166698	0.00162816	-0.00869996	-0.00451036	-0.0050991	0.0229544	0.0564062	0.973699	0.0223399	0.0253401	0.973699	0.0380102	0.0380102
MA0838.1_CEBPG	CD16+ Monocyte	-0.0212625	0.0131815	0.0219348	-0.0483466	0.013975	0.0115943	0.0200765	0.0215848	0.0235819	0.0229695	0.0564062	0.0229142	0.0129414	0.73981	0.0343713	0.0343713	0.73981
MA0160.1_NR4A2	CD16+ Monocyte	0.00879748	0.000658339	-0.00955131	0.00360156	0.00164899	-0.00132297	-0.0125661	-0.00336194	-0.0147624	0.0262531	0.0628738	0.248535	0.00971542	0.137967	0.248535	0.0291463	0.20695
MA0664.1_MLXIPL	CD16+ Monocyte	-0.0117532	-0.00381534	0.00317341	-0.0192468	-0.00255398	-0.00633807	0.00464475	0.00756753	-0.00293395	0.0263308	0.0628738	0.488718	0.00621106	0.137967	0.488718	0.0186332	0.20695
MA0802.1_TBR1	CD16+ Monocyte	-0.00554592	0.00350647	-0.00354133	-0.0127288	0.00375658	0.00300626	-0.00160585	-0.00537027	-0.00269788	0.0265755	0.0628738	0.0192424	0.407411	0.0317443	0.0476164	0.407411	0.0476164
MA0663.1_MLX	CD16+ Monocyte	-0.0120685	-0.00294073	0.00331691	-0.0169689	-0.00254333	-0.00373553	0.00461584	0.00728596	-0.0021796	0.0294177	0.0685806	0.156288	0.00971542	0.24062	0.234432	0.0291463	0.24062
MA0112.3_ESR1	CD16+ Monocyte	-0.0163321	0.00184777	-0.00484431	-0.0147271	0.00220044	0.00114242	-0.000461922	0.00169308	-0.0153929	0.0296947	0.0685806	0.006211	0.11374	0.298062	0.018633	0.17061	0.298062
MA0105.4_NFKB1	CD16+ Monocyte	-0.0170769	0.0167388	-0.0111521	-0.0125793	0.0171893	0.0158377	-0.00655211	-0.000990927	-0.0260735	0.0333039	0.0760112	0.0377971	0.497879	0.0225805	0.0566956	0.497879	0.0566956
MA0749.1_ZBED1	CD16+ Monocyte	0.00940865	-0.0113406	0.0182487	0.00026332	-0.0147924	-0.00443688	0.0244279	0.0156709	0.0171366	0.0350034	0.078961	0.0377971	0.860503	0.0200859	0.0566956	0.860503	0.0566956
MA0474.2_ERG	CD16+ Monocyte	0.00851237	-0.00324527	4.45676e-05	0.00151084	-0.00694553	0.00415524	-0.00295104	0.00267309	-0.00102497	0.0379015	0.084516	0.0111292	0.0832321	0.387877	0.0333877	0.124848	0.387877
MA0024.3_E2F1	CD16+ Monocyte	-0.0104335	-0.00535211	0.00947805	-0.0116562	-0.0083132	0.000570051	0.00525224	0.0020848	0.0209207	0.0385698	0.0850288	0.620928	0.0328502	0.0439283	0.620928	0.0658925	0.0658925
MA0106.3_TP53	CD16+ Monocyte	-0.0120648	0.000500447	-0.00332404	0.00269029	0.00096333	-0.000425318	-0.00518372	0.00339168	-0.00991926	0.0409012	0.0891555	0.0160957	0.0532274	0.54998	0.048287	0.0798411	0.54998
MA0098.3_ETS1	CD16+ Monocyte	0.0066481	-0.00327435	-0.000178461	-0.00139641	-0.00651621	0.00320937	-0.00419755	0.000832384	0.00132161	0.0413954	0.0892301	0.0134105	0.0746771	0.438391	0.0402316	0.112016	0.438391
MA0823.1_HEY1	CD16+ Monocyte	-0.00508161	0.00438635	0.00118673	-0.0134223	0.00097652	0.011206	-0.000853221	0.0057913	-0.00282528	0.0422221	0.090012	0.0517542	0.0170811	0.73981	0.0776313	0.0512432	0.73981
MA0476.1_FOS	CD16+ Monocyte	-0.0325502	0.0134567	-0.0147265	-0.018372	0.0154752	0.00941978	-0.0154387	0.00312439	-0.0350778	0.0490828	0.103501	0.0229142	0.167351	0.150115	0.0687425	0.167351	0.167351
MA0834.1_ATF7	CD16+ Monocyte	-0.0139837	0.00755408	0.00627942	-0.025424	0.00268467	0.0172929	0.00755951	0.00646403	0.00521064	0.0510359	0.106462	0.0271799	0.042003	0.73981	0.0630045	0.0630045	0.73981
MA0690.1_TBX21	CD16+ Monocyte	-0.00880919	0.0019325	-0.00161258	-0.00946378	0.00548818	-0.00517887	-0.000405742	-0.000667804	-0.00351936	0.0531792	0.109753	0.0443138	0.0532274	0.277976	0.0798411	0.0798411	0.277976
MA0757.1_ONECUT3	CD16+ Monocyte	-0.00489411	-0.00074769	0.00757733	0.00261428	-0.00176577	0.00128846	0.0112491	0.00281753	0.0106825	0.0584501	0.118902	0.448279	0.0371874	0.0882301	0.448279	0.111562	0.132345
MA0655.1_JDP2	CD16+ Monocyte	-0.0349013	0.0122784	-0.0155181	-0.0202352	0.0155384	0.00575843	-0.0105637	-0.00105049	-0.0356999	0.0588382	0.118902	0.0377971	0.152437	0.137967	0.113391	0.152437	0.152437
MA0466.2_CEBPB	CD16+ Monocyte	-0.0147214	0.0117673	0.0182042	-0.0492646	0.0112277	0.0128464	0.0132421	0.0170762	0.0228281	0.0656345	0.131269	0.0517542	0.0371874	0.70663	0.0776313	0.0776313	0.70663
MA0740.1_KLF14	CD16+ Monocyte	-0.00465185	1.84609e-05	0.00464372	-0.00786342	0.00204218	-0.00402898	0.00386329	0.000396896	0.0101186	0.0675072	0.133637	0.22252	0.0254614	0.277976	0.277976	0.0763843	0.277976
MA0695.1_ZBTB7C	CD16+ Monocyte	-0.00101642	0.00133124	0.00427848	-0.00267477	0.00266249	-0.00133125	0.00626405	0.00338142	0.00400133	0.0719641	0.141021	0.106206	0.042003	0.298062	0.159309	0.126009	0.298062
MA0796.1_TGIF1	CD16+ Monocyte	-0.00691228	0.00249162	-0.00458982	-0.000821314	0.00364462	0.000185624	-0.00632861	0.00167632	-0.0107411	0.0771708	0.149711	0.0697861	0.782431	0.0439283	0.104679	0.782431	0.104679
MA0771.1_HSF4	CD16+ Monocyte	0.00581335	-0.00257709	0.00181158	-0.00253163	-0.00740917	0.00708707	0.00381879	0.00415228	-0.00225739	0.0780605	0.149938	0.0377971	0.280362	0.137967	0.113391	0.280362	0.20695
MA0770.1_HSF2	CD16+ Monocyte	0.00343311	-0.00314738	0.00471555	-0.00890884	-0.00581608	0.00219004	0.000760691	0.00291077	0.00945771	0.0807383	0.153561	0.176462	0.563662	0.028387	0.264693	0.563662	0.0851609
MA0759.1_ELK3	CD16+ Monocyte	0.00495739	-0.0059354	0.00459908	-0.00439516	-0.00863764	-0.000530919	-0.00184622	0.00331796	0.0103906	0.0830054	0.15634	0.0697861	0.821245	0.0487819	0.104679	0.821245	0.104679
MA0130.1_ZNF354C	CD16+ Monocyte	-0.000239866	-0.000146665	0.00192424	-0.00533226	0.000647238	-0.00173447	0.000836643	0.00289831	0.00151288	0.0864147	0.161197	0.276605	0.042003	0.206948	0.276605	0.126009	0.276605
MA0899.1_HOXA10	CD16+ Monocyte	0.00340389	-0.00248676	0.0042355	0.000390297	-0.00468337	0.00190647	0.00844051	0.00440418	0.00123536	0.088615	0.163727	0.22252	0.669538	0.0253401	0.33378	0.669538	0.0760204
MA0837.1_CEBPE	CD16+ Monocyte	-0.0146632	0.0103307	0.0177655	-0.0470799	0.0110411	0.00890988	0.0130976	0.0168796	0.021911	0.0909858	0.164905	0.0602125	0.0597191	0.579915	0.0903188	0.0903188	0.579915
MA0776.1_MYBL1	CD16+ Monocyte	-0.0172889	0.00613877	0.00193765	-0.0178039	0.00367101	0.0110743	0.00390168	-0.00498144	0.00870056	0.0914347	0.164905	0.0602125	0.0532274	1	0.0903188	0.0903188	1
MA0046.2_HNF1A	CD16+ Monocyte	-0.00142132	-0.000494978	0.00737504	-0.00618737	-0.000201849	-0.00108123	0.0028589	0.0033844	0.0150415	0.0925869	0.164905	0.488718	0.102719	0.0598453	0.488718	0.154078	0.154078
MA0073.1_RREB1	CD16+ Monocyte	-0.00478286	0.00252064	-0.00314288	-0.00313491	0.00270773	0.00214645	0.00156377	-0.00344248	-0.00593111	0.0926529	0.164905	0.0517542	0.407411	0.106041	0.155263	0.407411	0.159061
MA0028.2_ELK1	CD16+ Monocyte	0.00441682	-0.00519556	0.00706759	-0.00419366	-0.00685508	-0.00187652	-0.000357093	0.00638748	0.0128108	0.101699	0.179361
MA0475.2_FLI1	CD16+ Monocyte	0.00526337	-0.0043804	0.00151162	-0.00167933	-0.00733639	0.0015316	-0.00386024	0.00314	0.00319309	0.107941	0.188654
MA0844.1_XBP1	CD16+ Monocyte	-0.00872106	0.00570031	0.000481675	-0.00937945	0.000135666	0.0168296	-0.00313995	0.000958208	0.00234014	0.110329	0.191106
MA0694.1_ZBTB7B	CD16+ Monocyte	-0.00435411	-0.00126065	0.00070174	-0.00609182	0.000236235	-0.00425442	0.00475334	0.00455348	-0.00649302	0.112818	0.193687
MA0763.1_ETV3	CD16+ Monocyte	0.00540212	-0.00619958	0.00206684	-0.00295011	-0.00923547	-0.000127819	-0.00416678	0.00291623	0.00523165	0.116327	0.197229
MA0091.1_TAL1::TCF3	CD16+ Monocyte	0.00463215	-0.00153205	-0.00181052	-0.00425115	-0.00267101	0.000745876	-0.00476889	1.57285e-05	-0.00196891	0.116914	0.197229
MA0666.1_MSX1	CD16+ Monocyte	-0.00527837	-0.00425423	0.00214347	0.00124526	-0.00524329	-0.00227611	0.00166766	-0.00114627	0.00629872	0.12018	0.199272
MA0708.1_MSX2	CD16+ Monocyte	-0.00527837	-0.00425423	0.00214347	0.00124526	-0.00524329	-0.00227611	0.00166766	-0.00114627	0.00629872	0.12018	0.199272
MA0861.1_TP73	CD16+ Monocyte	-0.00999238	-0.000647341	-0.000936166	-0.00403709	0.0016072	-0.00515642	-0.0117937	0.00984037	-0.00627045	0.125913	0.207009
MA0486.2_HSF1	CD16+ Monocyte	0.000252884	-0.00201526	0.00478384	-0.00762958	-0.00603674	0.0060277	0.00242917	0.00229062	0.00926237	0.13094	0.213466
MA0625.1_NFATC3	CD16+ Monocyte	-0.00411281	-0.00243543	0.00595503	-0.0101345	-0.00368069	5.50848e-05	0.00496357	0.00367374	0.00927749	0.132992	0.215003
MA0665.1_MSC	CD16+ Monocyte	-0.00244171	0.00278051	-0.0028923	-0.00726641	0.00376269	0.000816133	0.00236494	-0.00339094	-0.00581537	0.136853	0.219417
MA0670.1_NFIA	CD16+ Monocyte	0.00208799	0.00126865	-0.00353714	-0.00418933	0.00168102	0.000443912	0.000169873	-0.000248012	-0.0098458	0.142187	0.226101
MA0736.1_GLIS2	CD16+ Monocyte	-0.00665297	0.00122564	-0.00167852	0.0012575	0.000192249	0.00329241	-0.000763804	-0.00076784	-0.0033508	0.144787	0.228363
MA0638.1_CREB3	CD16+ Monocyte	-0.00509741	0.00262564	0.00430532	-0.00934602	0.000686629	0.00650366	0.00186596	0.0044768	0.00573151	0.14736	0.230547
MA0163.1_PLAG1	CD16+ Monocyte	-0.00278833	0.00192165	-0.00191852	-0.00294017	0.000814945	0.00413506	-0.00018379	-0.000936929	-0.00422021	0.162558	0.252289
MA0895.1_HMBOX1	CD16+ Monocyte	0.00195282	-0.00993907	-0.000793558	0.00857609	-0.0114324	-0.00695243	-0.00214641	0.00114694	-0.00215557	0.170863	0.263075
MA0088.2_ZNF143	CD16+ Monocyte	-0.00272866	-0.000734312	0.00142795	0.00077463	0.00123716	-0.00467726	0.00278339	0.00198846	-0.000129602	0.174298	0.26519
MA0855.1_RXRB	CD16+ Monocyte	0.00211612	-0.000955128	-0.00489788	0.00406748	-3.55268e-05	-0.00279433	-0.00602528	-0.00121307	-0.00844523	0.174971	0.26519
MA0819.1_CLOCK	CD16+ Monocyte	-0.0106086	0.00151841	-0.00442856	-0.00392156	-0.00294034	0.0104359	0.00230725	-0.00131224	-0.0125548	0.193329	0.290742
MA0083.3_SRF	CD16+ Monocyte	0.00146526	-0.00407179	-0.00777781	0.013636	-0.00487014	-0.0024751	-0.0147293	-0.00357607	-0.0080455	0.21218	0.316638
MA0634.1_ALX3	CD16+ Monocyte	-0.00380623	-8.58422e-05	0.00435716	0.000479699	-0.000862801	0.00146808	0.00204105	-0.002701	0.0141358	0.216603	0.320772
MA0648.1_GSC	CD16+ Monocyte	-0.00751076	0.00153409	0.00232573	-0.00246969	0.00372088	-0.00283948	0.00803851	0.000527349	0.000615337	0.221277	0.32521
MA0628.1_POU6F1	CD16+ Monocyte	-0.00403659	0.000695409	0.00715743	-0.0165309	-0.00336805	0.00882232	0.00873975	-0.00268435	0.0175846	0.231061	0.334701
MA0259.1_ARNT::HIF1A	CD16+ Monocyte	-0.00368047	-0.00087712	0.00104733	-0.00718994	0.00152802	-0.0056874	0.00241478	0.00385674	-0.00314196	0.231185	0.334701
MA0674.1_NKX6-1	CD16+ Monocyte	0.00759322	-0.000122625	0.0129917	-0.00798605	0.00152289	-0.00341365	0.0215364	0.00123181	0.0210151	0.237411	0.341168
MA0595.1_SREBF1	CD16+ Monocyte	-0.00678671	0.00225825	-0.00188646	0.00417151	-0.000166009	0.00710676	0.00179367	0.000940974	-0.00763856	0.246699	0.348793
MA0152.1_NFATC2	CD16+ Monocyte	-0.000371761	-0.00268508	0.00497845	-0.00862388	-0.00391656	-0.000222109	0.00267153	0.0035697	0.00815995	0.246978	0.348793
MA0498.2_MEIS1	CD16+ Monocyte	0.00369707	-0.00140271	0.000120049	0.000998677	-0.00178518	-0.000637778	0.00289253	-0.00111711	-0.000284924	0.248111	0.348793
MA0733.1_EGR4	CD16+ Monocyte	-0.00314269	-0.000541179	0.00149652	0.00409135	-0.00100703	0.000390531	0.00295847	-0.000609393	0.00297877	0.275832	0.384974
MA0113.3_NR3C1	CD16+ Monocyte	-0.00453669	-0.00112704	0.00145516	0.0104219	-0.00502441	0.00666769	0.000847381	0.00153073	0.00177219	0.296397	0.410721
MA0758.1_E2F7	CD16+ Monocyte	-0.00433213	-0.00105735	0.00298263	-0.012542	-0.00557713	0.00798222	-0.000415718	0.00288683	0.00535997	0.304406	0.418332
MA0886.1_EMX2	CD16+ Monocyte	-0.0044019	-0.00211995	0.00451546	-0.0134205	0.00270291	-0.0117657	0.0174055	-0.00539594	0.00748538	0.306202	0.418332
MA0647.1_GRHL1	CD16+ Monocyte	-0.00479978	0.000342966	0.00211345	-0.0120778	0.0012363	-0.0014437	-0.00336375	0.00509528	0.00228612	0.312144	0.423468
MA0504.1_NR2C2	CD16+ Monocyte	-1.03595e-05	0.00146065	-0.00281282	-0.00355725	0.00180836	0.000765234	0.00033929	-0.00187134	-0.00601264	0.316646	0.426593
MA0795.1_SMAD3	CD16+ Monocyte	-0.0121077	0.0092675	-0.0129622	0.0270522	0.00923461	0.00933327	-0.0167453	-0.00719977	-0.0171629	0.32133	0.429917
MA0699.1_LBX2	CD16+ Monocyte	-0.000733204	-0.00378246	0.00217701	-0.00187267	0.00029125	-0.0119299	-0.000854704	-0.000805961	0.00767828	0.343648	0.456628
MA0139.1_CTCF	CD16+ Monocyte	-0.00235489	0.00183276	0.0142591	-0.00807622	0.00459778	-0.00369729	0.00982282	0.000360388	0.0334319	0.346611	0.457433
MA0523.1_TCF7L2	CD16+ Monocyte	-0.00345822	0.00181514	-0.000147812	-0.00176695	0.00284377	-0.000242116	-0.000783468	-9.53532e-06	0.000114635	0.352431	0.459422
MA0596.1_SREBF2	CD16+ Monocyte	-0.00425975	0.00130259	-0.00246	-0.000810391	8.17201e-06	0.00389144	0.00199837	-0.00111036	-0.00700682	0.355547	0.459422
MA0630.1_SHOX	CD16+ Monocyte	0.00619181	-0.0028404	0.00306311	0.000941069	0.000316439	-0.00915407	0.00670961	-0.00471536	0.009707	0.357592	0.459422
MA0717.1_RAX2	CD16+ Monocyte	0.00619181	-0.0028404	0.00306311	0.000941069	0.000316439	-0.00915407	0.00670961	-0.00471536	0.009707	0.357592	0.459422
MA0719.1_RHOXF1	CD16+ Monocyte	-9.49616e-05	-0.00123401	0.00368462	-0.00700538	-0.00095672	-0.00178858	0.00162036	0.00448046	0.00413232	0.382244	0.487864
MA0074.1_RXRA::VDR	CD16+ Monocyte	0.000828028	0.0021445	-0.00355913	-0.00127647	0.00156724	0.00329903	-0.00370629	0.000406538	-0.00808762	0.39274	0.497984
MA0777.1_MYBL2	CD16+ Monocyte	0.00143739	-0.00201285	-0.0033843	0.0059912	0.000678617	-0.00739578	-0.00602466	-0.00755527	0.00324207	0.396813	0.499881
MA0032.2_FOXC1	CD16+ Monocyte	0.00134058	-0.0016687	0.00284969	0.000491161	-0.00206547	-0.000875169	0.00719503	-0.000847288	0.00426593	0.405379	0.507377
MA0662.1_MIXL1	CD16+ Monocyte	0.00487176	-0.00377666	0.00228529	-0.00675338	-0.0045793	-0.00217138	0.00282722	-0.00406337	0.00933076	0.438711	0.545577
MA0791.1_POU4F3	CD16+ Monocyte	-0.000554058	0.00245725	0.00381578	-0.00173465	0.00208468	0.0032024	0.00346619	-0.000657678	0.00926786	0.448809	0.554579
MA0808.1_TEAD3	CD16+ Monocyte	-0.00150819	0.000449401	0.00304694	-0.0113992	-0.00315219	0.00765259	-0.00147363	0.00556637	0.00312131	0.453209	0.556471
MA0671.1_NFIX	CD16+ Monocyte	-0.00140836	0.00130704	-0.00218333	-0.00570192	0.0010634	0.00179431	-0.000564763	-0.00168935	-0.00383867	0.494918	0.603862
MA0698.1_ZBTB18	CD16+ Monocyte	-0.00249079	-0.000373015	0.000593623	-0.00154421	0.000359132	-0.00183731	-0.00303429	0.00205717	0.00130476	0.507849	0.615767
MA0678.1_OLIG2	CD16+ Monocyte	0.00524027	0.00279865	-0.000764993	-0.00050175	0.00124685	0.00590225	-0.00122858	-0.00885718	0.00898495	0.541361	0.652323
MA0800.1_EOMES	CD16+ Monocyte	-0.00385844	0.000838837	-0.000298772	-0.00899306	0.00302635	-0.0035362	0.00225797	-0.00466434	0.0030899	0.558867	0.665551
MA0472.2_EGR2	CD16+ Monocyte	-0.000449972	-0.000498412	0.00196302	0.0040099	-0.000886604	0.00027797	-0.00105028	-3.8156e-05	0.00630658	0.5592	0.665551
MA0713.1_PHOX2A	CD16+ Monocyte	0.00213494	-0.00173406	0.00517356	0.0109168	-0.00566204	0.00612189	-0.000488965	0.00363592	0.0107425	0.579256	0.685218
MA0752.1_ZNF410	CD16+ Monocyte	0.00367226	-0.00115189	0.00426002	-0.0044064	-0.000488183	-0.0024793	-0.00308984	0.00246894	0.0112495	0.604822	0.707017
MA0600.2_RFX2	CD16+ Monocyte	0.00738971	-0.000338631	0.00155989	0.0128103	0.00035885	-0.00173359	0.000900488	0.00257696	0.00081291	0.604973	0.707017
MA0793.1_POU6F2	CD16+ Monocyte	0.00261281	0.00137524	0.000691309	-0.00248847	0.00341512	-0.00270452	-0.0043523	-0.00341187	0.00884076	0.610275	0.708942
MA0669.1_NEUROG2	CD16+ Monocyte	-0.00493432	-0.0071062	-0.00439983	0.00523904	-0.0044693	-0.01238	-0.00280194	-0.00215241	-0.00808708	0.616845	0.712309
MA0903.1_HOXB3	CD16+ Monocyte	0.00302942	-0.00161199	0.0014955	-3.02325e-05	-0.00276523	0.000694501	0.007702	-0.00124275	0.000552456	0.634649	0.728532
MA0818.1_BHLHE22	CD16+ Monocyte	0.00405	-0.00282904	-0.00276196	-0.00402952	0.00061298	-0.00971308	-0.00770925	-0.0027036	0.000468129	0.645851	0.73703
MA0479.1_FOXH1	CD16+ Monocyte	-0.00275682	0.000627034	0.000588521	-0.00651864	0.000834263	0.000212576	-0.00113111	-0.00176218	0.00447742	0.664199	0.753535
MA0894.1_HESX1	CD16+ Monocyte	-0.00259669	-0.00585961	0.000577628	-0.00283081	-0.00231797	-0.0129429	0.00213038	-0.00301973	0.00373937	0.68478	0.772368
MA0070.1_PBX1	CD16+ Monocyte	0.00232602	-0.00126231	0.00290832	0.00392808	-0.00239501	0.0010031	-0.00309376	0.00304767	0.00674713	0.702571	0.787854
MA0724.1_VENTX	CD16+ Monocyte	-0.00337971	-0.0021927	0.00177527	-0.00941678	-0.00121478	-0.00414855	0.000599923	-0.00563602	0.0112053	0.735288	0.819804
MA0510.2_RFX5	CD16+ Monocyte	0.00641743	0.000418869	0.00376525	0.0175483	0.00101078	-0.000764959	0.000497427	0.0014011	0.00870196	0.740617	0.821027
MA0843.1_TEF	CD16+ Monocyte	0.00111288	0.00377829	0.00805307	-0.0135728	0.00552047	0.000293918	0.00636554	0.00856816	0.00857714	0.754482	0.83087
MA0599.1_KLF5	CD16+ Monocyte	-0.00094436	0.00017361	-0.000796245	-0.00122346	0.000274439	-2.80492e-05	0.00201234	-0.00110719	-0.00230587	0.758061	0.83087
MA0729.1_RARA	CD16+ Monocyte	-0.00185517	0.00107982	-0.00350191	-0.0073103	0.00462281	-0.00600615	-4.61271e-05	-0.00101641	-0.00870551	0.773075	0.842565
MA0048.2_NHLH1	CD16+ Monocyte	0.00138269	0.00129179	-0.000550361	0.00267637	-0.00132967	0.00653471	-0.00559387	0.00195779	-0.000114189	0.793061	0.859519
MA0525.2_TP63	CD16+ Monocyte	0.000256632	0.000241214	0.000424466	-0.00848608	-5.53198e-05	0.000834282	-0.00171003	0.00141024	0.00069739	0.810804	0.867408
MA0661.1_MEOX1	CD16+ Monocyte	0.00100519	-0.00150097	0.00346326	-0.0110868	-0.00205383	-0.000395247	0.0182539	-0.00136138	-0.000768439	0.813355	0.867408
MA0790.1_POU4F1	CD16+ Monocyte	0.00439422	0.00190943	0.00451688	-0.00590589	0.000750971	0.00422634	0.00166122	0.00210735	0.00923178	0.813754	0.867408
MA0707.1_MNX1	CD16+ Monocyte	-0.00170577	0.000378309	-0.000349034	0.00163863	0.000107815	0.000919298	0.00243735	-0.00227709	4.27708e-05	0.838609	0.889017
MA0774.1_MEIS2	CD16+ Monocyte	-0.00121265	-0.00161348	0.000210654	-0.00166658	0.00066886	-0.00617816	0.003931	1.96405e-05	-0.00204672	0.849593	0.895767
MA0646.1_GCM1	CD16+ Monocyte	-0.00310388	-0.000242281	0.000343653	-0.0010782	-0.00326013	0.00579341	-0.00628183	-0.00176238	0.00721769	0.865215	0.906583
MA0639.1_DBP	CD16+ Monocyte	0.00469627	0.00540257	0.00444254	-0.0193839	0.00313459	0.00993853	0.00708016	0.0040148	0.00318315	0.871896	0.906583
MA0737.1_GLIS3	CD16+ Monocyte	-0.00456904	-0.00162194	-0.00528253	-0.0012438	-0.00226338	-0.000339061	-0.00512504	-0.000552699	-0.0109057	0.873871	0.906583
MA0863.1_MTF1	CD16+ Monocyte	0.000144733	0.00104151	-0.000438838	-0.00121404	0.000990236	0.00114405	-0.000292293	-0.0025505	0.00192707	0.881875	0.91002
MA0138.2_REST	CD16+ Monocyte	-0.00133193	-0.000232219	-0.00102295	-0.0083845	-0.00257136	0.00444605	-0.00140953	0.000434206	-0.00246525	0.912863	0.934161
MA0668.1_NEUROD2	CD16+ Monocyte	-0.00235186	-0.004114	-0.00245592	-0.00582695	-0.00321928	-0.00590345	0.00210769	-0.00371932	-0.00402435	0.9149	0.934161
MA0826.1_OLIG1	CD16+ Monocyte	-0.00163259	0.000437503	-0.00201359	-0.011574	0.0034673	-0.00562209	-0.0018599	-0.00328315	-0.000634911	0.965056	0.980214
MA0804.1_TBX19	CD16+ Monocyte	-0.0023341	-0.000173204	0.000540448	-0.0154339	0.00149565	-0.00351091	-0.00370719	0.00452005	-0.00127066	0.974935	0.983318
MA0775.1_MEIS3	CD16+ Monocyte	0.00112992	0.00145869	0.000260103	-0.00452532	0.00229533	-0.000214594	0.00151917	0.00132227	-0.00181847	0.978249	0.983318
MA0727.1_NR3C2	CD16+ Monocyte	0.000947127	0.00107237	0.00166304	0.0119822	-0.00292727	0.00907166	0.00433881	0.00678418	-0.00609547	0.993135	0.993135
MA0046.2_HNF1A	CD4+ TCM	0.00193241	-0.0119322	0.0147532	0.00175447	-0.0134172	-0.00896212	0.00339512	0.0124311	0.0250344	0.000325558	0.0662373	0.0443138	0.152437	6.13889e-05	0.0664707	0.152437	0.000184167
MA0137.3_STAT1	CD4+ TCM	-0.0124928	0.00315038	-6.9357e-05	-0.0121052	0.00244988	0.00455138	-0.0017259	0.00271991	-0.00221914	0.00127858	0.0662373	0.0229142	9.97302e-05	0.341079	0.0343713	0.00029919	0.341079
MA0903.1_HOXB3	CD4+ TCM	0.0121937	-0.0128508	0.00284077	0.0145224	-0.0134415	-0.0116695	0.0001795	0.00301401	0.00441282	0.00161296	0.0662373	0.00173586	0.0473361	0.0158088	0.00520758	0.0473361	0.0237132
MA0887.1_EVX1	CD4+ TCM	0.0131564	-0.0117622	-0.000628338	0.0181679	-0.0134165	-0.00845361	-0.00203703	-0.00706625	0.00782168	0.00237883	0.0662373	0.00138387	0.0195566	0.0882301	0.0041516	0.0293348	0.0882301
MA0144.2_STAT3	CD4+ TCM	-0.00883818	0.00337209	-0.00133818	-0.00773718	0.00282362	0.00446902	0.000229798	-0.0014376	-0.00226752	0.00240029	0.0662373	0.0192424	0.00058309	0.163063	0.0288637	0.00174927	0.163063
MA0699.1_LBX2	CD4+ TCM	0.004457	-0.011325	0.00621282	0.0111697	-0.0112195	-0.0115362	0.00621649	0.00229222	0.0107844	0.00242632	0.0662373	0.00173586	0.900109	0.003727	0.00520758	0.900109	0.0055905
MA0131.2_HINFP	CD4+ TCM	0.000999557	-0.00146048	0.00628224	-0.00553117	-0.00200456	-0.000372316	0.00561636	0.00721988	0.00563224	0.00242986	0.0662373	0.373378	0.0668543	0.000508879	0.373378	0.100282	0.00152664
MA0717.1_RAX2	CD4+ TCM	0.0028631	-0.0111025	0.00720709	0.0103166	-0.00832654	-0.0166543	0.00569725	0.00048023	0.0160616	0.00258487	0.0662373	0.0134105	0.218646	0.00179754	0.0201158	0.218646	0.00539261
MA0073.1_RREB1	CD4+ TCM	-0.00234837	0.00669147	-0.00531266	0.000395592	0.00855396	0.00296648	-0.00234985	-0.0063234	-0.00610868	0.00353747	0.0731921	0.0377971	0.563662	0.000828193	0.0566956	0.563662	0.00248458
MA0666.1_MSX1	CD4+ TCM	-0.000408803	-0.00730003	0.0100597	0.00991448	-0.0081498	-0.00560049	0.0041105	0.00934562	0.0148589	0.00421746	0.0731921	0.306762	0.0371874	0.00208737	0.306762	0.0557812	0.0062621
MA0708.1_MSX2	CD4+ TCM	-0.000408803	-0.00730003	0.0100597	0.00991448	-0.0081498	-0.00560049	0.0041105	0.00934562	0.0148589	0.00421746	0.0731921	0.306762	0.0371874	0.00208737	0.306762	0.0557812	0.0062621
MA0788.1_POU3F3	CD4+ TCM	0.000639962	-0.00821735	0.00395439	0.00495888	-0.00705167	-0.0105487	-0.000316623	0.00104517	0.0101958	0.00428441	0.0731921	0.0321142	0.379581	0.00154512	0.0481713	0.379581	0.00463536
MA0630.1_SHOX	CD4+ TCM	0.00168794	-0.0120538	0.00820283	0.00809899	-0.0110603	-0.0140408	0.0061687	0.00183123	0.0169924	0.00561933	0.0832798	0.0321142	0.258595	0.00279938	0.0481713	0.258595	0.00839813
MA0821.1_HES5	CD4+ TCM	-0.0098939	0.00444599	-0.00150697	-0.00789346	0.00206002	0.00921793	0.00143307	-1.9876e-05	-0.00520193	0.0056874	0.0832798	0.00412677	0.0129414	0.22333	0.0123803	0.0194121	0.22333
MA0059.1_MAX::MYC	CD4+ TCM	-0.00812762	0.00211564	0.00309355	-0.00269103	0.00117038	0.00400617	0.00016445	0.00438757	0.00353659	0.00612112	0.0836553	0.00919942	0.00331122	0.807584	0.0137991	0.00993366	0.807584
MA0838.1_CEBPG	CD4+ TCM	-0.00534357	0.0060548	0.0112101	0.00315193	0.00116557	0.0158333	0.00644344	0.0155118	0.00936926	0.0074311	0.0884521	0.0271799	0.00201581	0.673998	0.0407698	0.00604743	0.673998
MA0648.1_GSC	CD4+ TCM	-0.00397807	-0.00822016	0.00462957	-0.00506327	-0.0123761	9.17726e-05	0.00772248	-0.000483208	0.00853254	0.00755647	0.0884521	0.448279	0.0668543	0.0024195	0.448279	0.100282	0.00725851
MA0511.2_RUNX2	CD4+ TCM	0.0133566	0.0137002	-0.00912421	0.0172692	0.0148707	0.0113591	-0.0124696	-0.00462544	-0.0121425	0.0077834	0.0884521	0.766679	0.0195566	0.005648	0.766679	0.0293348	0.016944
MA0738.1_HIC2	CD4+ TCM	-0.00607223	0.00104292	0.00114203	-0.00276661	-0.000186984	0.00350273	0.00297126	0.00141396	-0.000394713	0.00829902	0.0884521	0.0160957	0.00331122	0.876835	0.0241435	0.00993366	0.876835
MA0711.1_OTX1	CD4+ TCM	0.00524676	-0.0135468	0.00871856	0.00329647	-0.0173121	-0.00601633	0.0124289	0.0146633	-0.000690577	0.00903018	0.0884521	0.0271799	0.497879	0.00428869	0.0407698	0.497879	0.0128661
MA0649.1_HEY2	CD4+ TCM	-0.00800866	0.00466659	0.00259121	-0.00810877	0.00489532	0.00420914	0.000374453	0.00600982	8.06783e-05	0.00906094	0.0884521	0.00757404	0.00971542	0.438391	0.0145731	0.0145731	0.438391
MA0804.1_TBX19	CD4+ TCM	-0.00277965	0.00857714	-0.00468619	0.00203353	0.00845671	0.00881801	-0.00387777	-0.00383936	-0.00621312	0.00973367	0.0907001	0.0111292	0.860503	0.00738457	0.0166938	0.860503	0.0166938
MA0675.1_NKX6-2	CD4+ TCM	0.00827741	-0.00781053	0.00509651	0.00975434	-0.0126798	0.00192805	0.000871584	0.00103371	0.0126531	0.0109296	0.0974159	0.0160957	0.633368	0.00738457	0.0241435	0.633368	0.0221537
MA0773.1_MEF2D	CD4+ TCM	-0.00345012	-0.000918009	0.00731056	0.000362716	-0.00192264	0.00109126	0.00623389	0.00638836	0.00910423	0.0124023	0.105936	0.276605	0.00388867	0.0968083	0.276605	0.011666	0.145212
MA0095.2_YY1	CD4+ TCM	-0.00445956	-0.00597936	0.00678583	-0.0120604	-0.00792341	-0.00209127	0.00559592	0.00796659	0.00620156	0.0135158	0.11083	0.531045	0.11374	0.003233	0.531045	0.17061	0.00969899
MA0101.1_REL	CD4+ TCM	0.00410996	0.0266082	-0.00648692	0.0269363	0.023255	0.0333147	-0.0056791	-0.000286204	-0.0142596	0.0143537	0.111399	0.121251	0.530253	0.00279938	0.181876	0.530253	0.00839813
MA0163.1_PLAG1	CD4+ TCM	-0.00500116	0.00111662	-4.95017e-05	-0.0067304	0.000946543	0.00145677	0.00206538	-0.00024337	-0.00123324	0.0153192	0.111399	0.0134105	0.0170811	0.319096	0.0256216	0.0256216	0.319096
MA0759.1_ELK3	CD4+ TCM	-0.000872934	-0.00390152	0.00435119	-0.00385048	-0.00679222	0.00187989	0.00842546	0.00712513	-0.00160125	0.0156317	0.111399	0.373378	0.218646	0.00279938	0.373378	0.327969	0.00839813
MA0822.1_HES7	CD4+ TCM	-0.00757205	0.00374522	-0.000413836	-0.0073702	0.000515104	0.0102054	0.00234169	0.000410655	-0.00321276	0.0157589	0.111399	0.0192424	0.0223399	0.150115	0.0335098	0.0335098	0.150115
MA0628.1_POU6F1	CD4+ TCM	0.00655954	-0.0213538	0.00548709	0.00441384	-0.0221238	-0.0198137	0.00733601	-0.00210361	0.0131103	0.01725	0.115502	0.0192424	0.706491	0.0123542	0.0288637	0.706491	0.0288637
MA0058.3_MAX	CD4+ TCM	-0.00613079	0.00477284	0.00351874	0.000912524	0.00517683	0.00396486	-0.000971882	0.00503043	0.00474886	0.0174661	0.115502	0.0111292	0.0223399	0.387877	0.0333877	0.0335098	0.387877
MA0894.1_HESX1	CD4+ TCM	0.00345859	-0.0106589	0.0033746	0.0155919	-0.00896235	-0.0140521	0.00315233	-0.00533924	0.0136889	0.0182163	0.116698	0.0134105	0.821245	0.0158088	0.0237132	0.821245	0.0237132
MA0729.1_RARA	CD4+ TCM	-0.0122098	-0.00103903	9.03932e-05	-0.00773121	-0.00243369	0.00175031	0.000660696	0.0025647	-0.00317651	0.0202639	0.12247	0.0192424	0.0129414	0.610592	0.0288637	0.0288637	0.610592
MA0899.1_HOXA10	CD4+ TCM	0.000308343	-0.00859956	0.00540921	0.00322615	-0.0115706	-0.00265746	0.00403854	0.00266828	0.00952076	0.0203121	0.12247	0.137913	0.238029	0.00738457	0.20687	0.238029	0.0221537
MA0825.1_MNT	CD4+ TCM	-0.0110292	0.00220023	0.0015392	-0.00536218	5.25239e-05	0.00649565	-0.00200365	0.00520926	-0.00038063	0.0217833	0.123005	0.0271799	0.00971542	0.911853	0.0407698	0.0291463	0.911853
MA0791.1_POU4F3	CD4+ TCM	-8.17611e-05	-0.0108942	0.00526184	-0.000975701	-0.0155799	-0.00152282	0.00147269	0.00442603	0.00876306	0.0219349	0.123005	0.0926813	0.530253	0.006464	0.139022	0.530253	0.019392
MA0781.1_PAX9	CD4+ TCM	-0.00447922	0.00192796	0.00527906	-0.00869146	0.000659794	0.00446428	0.00201797	0.00880455	0.00334006	0.0222009	0.123005	0.0697861	0.00838882	0.341079	0.104679	0.0251664	0.341079
MA0107.1_RELA	CD4+ TCM	0.00317487	0.0214964	-0.00887009	0.0243912	0.0187009	0.0270873	-0.00356646	-0.00261631	-0.0197019	0.0283462	0.15292	0.248535	0.563662	0.00428869	0.372802	0.563662	0.0128661
MA0050.2_IRF1	CD4+ TCM	-0.000194297	0.00720275	0.00867934	0.00194911	0.00925628	0.0030957	0.00790783	0.00954391	0.00818501	0.0298276	0.156008	0.0443138	0.0112259	0.842057	0.0664707	0.0336777	0.842057
MA0466.2_CEBPB	CD4+ TCM	-0.00165859	0.00872783	0.0112274	0.0116385	0.0039524	0.0182787	0.0112598	0.0121858	0.0100877	0.0304406	0.156008	0.0229142	0.0195566	0.876835	0.0343713	0.0343713	0.876835
MA0657.1_KLF13	CD4+ TCM	-0.00532002	-0.000528315	0.00262365	-0.00267429	0.00305596	-0.00769686	0.000118934	-0.000548004	0.00799373	0.0322232	0.161116	0.0271799	0.0223399	0.492491	0.0407698	0.0407698	0.492491
MA0794.1_PROX1	CD4+ TCM	-0.00177008	2.19648e-05	0.00536458	0.00296068	-0.00112724	0.00232037	0.0106788	0.0013723	0.00647941	0.0331541	0.161824	0.488718	0.00388867	0.298062	0.488718	0.011666	0.447094
MA0823.1_HEY1	CD4+ TCM	-0.00730866	0.00278401	0.00260819	-0.00753228	0.00234447	0.00366308	-0.000749979	0.00703958	-0.000322976	0.0363365	0.173232	0.0271799	0.0223399	0.947043	0.0407698	0.0407698	0.947043
MA0837.1_CEBPE	CD4+ TCM	-0.00107232	0.00876164	0.012584	0.0114024	0.0043374	0.0176101	0.0106	0.0128554	0.0135901	0.039743	0.180526	0.137913	0.00971542	0.492491	0.20687	0.0291463	0.492491
MA0770.1_HSF2	CD4+ TCM	-0.00154589	0.00563238	0.000445394	-0.00636337	0.00519514	0.00650686	0.00143544	0.001525	-0.00147418	0.0400178	0.180526	0.0271799	0.238029	0.0661139	0.0815397	0.238029	0.0991708
MA0784.1_POU1F1	CD4+ TCM	0.00519731	-0.00585347	0.00539647	0.00651262	-0.00617736	-0.00520568	0.00076009	0.00272003	0.0116099	0.0405083	0.180526	0.0321142	0.900109	0.028387	0.0481713	0.900109	0.0481713
MA0048.2_NHLH1	CD4+ TCM	-0.00288199	0.0024702	-0.00439133	-0.00143864	0.00163493	0.00414075	0.00360821	-0.00431583	-0.00981245	0.0421467	0.183831	0.0602125	0.706491	0.0200859	0.0903188	0.706491	0.0602577
MA0066.1_PPARG	CD4+ TCM	-0.00397502	0.00328302	-0.00159105	0.00252014	0.00105565	0.00773774	-0.000138185	-0.00484646	0.00123835	0.0443999	0.189625	0.0229142	0.327536	0.0729138	0.0687425	0.327536	0.109371
MA0790.1_POU4F1	CD4+ TCM	0.00113695	-0.00915629	0.00598121	-0.00180719	-0.0112754	-0.00491799	0.00181452	0.00435899	0.0106516	0.0463601	0.193956	0.0926813	0.497879	0.0200859	0.139022	0.497879	0.0602577
MA0596.1_SREBF2	CD4+ TCM	-0.00246723	0.00976624	0.00130236	-0.00255511	0.0117338	0.00583113	0.00404692	0.0031714	-0.0027079	0.0501483	0.201576	0.0271799	0.352952	0.0729138	0.0815397	0.352952	0.109371
MA0741.1_KLF16	CD4+ TCM	-0.00425403	0.000226384	-0.00127557	-0.000646234	0.00127682	-0.00187448	-0.000682313	-0.00272009	1.42011e-05	0.0501483	0.201576	0.0160957	0.0746771	0.54998	0.048287	0.112016	0.54998
MA0724.1_VENTX	CD4+ TCM	0.00292686	-0.00842946	0.00725337	0.0218258	-0.00733794	-0.0106125	0.00611489	0.00683047	0.00850573	0.0532701	0.210007	0.176462	0.633368	0.0139876	0.264693	0.633368	0.0419628
MA0786.1_POU3F1	CD4+ TCM	0.00297254	-0.00639686	0.00308737	0.00470132	-0.00672937	-0.00573185	-0.00138131	0.000872969	0.00864995	0.0555584	0.212761	0.0517542	0.939965	0.0317443	0.0776313	0.939965	0.0776313
MA0599.1_KLF5	CD4+ TCM	-0.00306474	0.000252458	-0.0013014	0.000120868	0.000901567	-0.00104576	-0.00135453	-0.00249305	0.00012428	0.0560445	0.212761	0.0229142	0.167351	0.191457	0.0687425	0.191457	0.191457
MA0028.2_ELK1	CD4+ TCM	0.00013611	-0.00430932	0.00426867	-0.00402665	-0.007342	0.00175606	0.00735326	0.00854512	-0.00277691	0.0573788	0.213866	0.339021	0.379581	0.0139876	0.379581	0.379581	0.0419628
MA0792.1_POU5F1B	CD4+ TCM	-8.04036e-05	-0.00573506	0.00597423	0.0115623	-0.00523392	-0.00673736	0.000262787	0.00514345	0.0107511	0.0589401	0.215763	0.575157	0.200423	0.0178353	0.575157	0.300635	0.0535059
MA0787.1_POU3F2	CD4+ TCM	0.00343013	-0.00468199	0.00463544	0.00670141	-0.00320934	-0.00762729	0.000509328	0.00368906	0.00849029	0.0669437	0.240763	0.106206	0.633368	0.028387	0.159309	0.633368	0.0851609
MA0674.1_NKX6-1	CD4+ TCM	0.00964581	-0.0040596	0.00572365	0.00843356	-0.00770211	0.00322541	0.000842459	0.00575703	0.00893883	0.0704708	0.246852	0.0377971	0.466589	0.0802756	0.113391	0.466589	0.120413
MA0785.1_POU2F1	CD4+ TCM	0.000869078	-0.00471509	0.00476915	0.00425301	-0.0053409	-0.00346346	0.00191618	0.00369412	0.00792532	0.0710453	0.246852	0.137913	0.530253	0.028387	0.20687	0.530253	0.0851609
MA0160.1_NR4A2	CD4+ TCM	-0.00403637	0.00343033	0.00247774	-0.00759353	0.000731637	0.00882772	0.000446569	0.00506608	0.000812123	0.0732652	0.248563	0.0377971	0.0597191	0.70663	0.0895787	0.0895787	0.70663
MA0707.1_MNX1	CD4+ TCM	0.00160773	-0.00802987	0.00231047	0.00373387	-0.0110919	-0.00190577	-0.000363422	0.000137564	0.00662812	0.0739625	0.248563	0.0926813	0.939965	0.0317443	0.139022	0.939965	0.0952328
MA0070.1_PBX1	CD4+ TCM	0.00745331	-0.00154436	0.00519897	0.0104881	-0.00190779	-0.000817511	-0.000421604	0.00635204	0.00760077	0.0798373	0.263978	0.0517542	0.74415	0.0598453	0.0897679	0.74415	0.0897679
MA0686.1_SPDEF	CD4+ TCM	0.00334022	-0.00500486	-7.98136e-05	-0.00566646	-0.00780349	0.000592406	0.00430602	0.00249284	-0.00600513	0.0854785	0.278115	0.0805752	0.352952	0.0661139	0.120863	0.352952	0.120863
MA0153.2_HNF1B	CD4+ TCM	0.00542461	-0.00121411	0.0144093	0.00602899	-0.00020575	-0.00323083	0.00118867	0.0118048	0.0262615	0.0868263	0.278115	0.22252	0.30334	0.039489	0.30334	0.30334	0.118467
MA0258.2_ESR2	CD4+ TCM	-0.00222011	0.00449165	0.00138861	-0.00337903	0.00261253	0.00824988	-0.00239096	0.0058296	-0.00127284	0.08887	0.280282	0.0377971	0.125672	0.387877	0.113391	0.188508	0.387877
MA0651.1_HOXC11	CD4+ TCM	-0.000916504	-0.0072939	0.00966243	-0.0154958	-0.00773883	-0.00640403	0.0109503	0.00641954	0.0125872	0.0939245	0.290379	0.306762	0.238029	0.0439283	0.306762	0.306762	0.131785
MA0513.1_SMAD2::SMAD3::SMAD4	CD4+ TCM	-0.00270507	0.00687062	-0.0085563	0.00100437	0.00632896	0.00795395	-0.00508638	-0.00749888	-0.0121033	0.0962427	0.290379	0.306762	0.183335	0.0540779	0.306762	0.275003	0.162234
MA0497.1_MEF2C	CD4+ TCM	-0.0039967	-0.000866932	0.00217592	-0.00319835	-0.00282976	0.00305872	0.00150586	0.00247603	0.00227251	0.0963207	0.290379	0.373378	0.0254614	0.364008	0.373378	0.0763843	0.373378
MA0775.1_MEIS3	CD4+ TCM	-0.00188268	0.00598672	-0.0034139	-0.00353765	0.00459385	0.00877244	-0.00103831	-0.00152741	-0.00719852	0.0985504	0.292795	0.156288	0.821245	0.0354365	0.234432	0.821245	0.106309
MA0507.1_POU2F2	CD4+ TCM	0.00259689	-0.00409865	0.00286779	0.00768495	-0.00425613	-0.00378367	-0.000831034	0.00318703	0.00496121	0.101943	0.295939
MA0662.1_MIXL1	CD4+ TCM	0.00153363	-0.00882305	0.0014245	0.00655274	-0.0100101	-0.00644902	0.00392372	-0.00527542	0.00757494	0.102496	0.295939
MA0875.1_BARX1	CD4+ TCM	0.00353204	-0.00338114	0.00763149	0.0146179	-0.00641611	0.00268878	0.00495688	0.00907257	0.00773329	0.111378	0.317119
MA0862.1_GMEB2	CD4+ TCM	0.0050111	-0.00116886	0.0119128	-0.0063579	0.00191789	-0.00734236	0.00531343	0.0146447	0.0131252	0.120023	0.327727
MA0715.1_PROP1	CD4+ TCM	0.00116043	-0.00697373	0.00529175	0.0008874	-0.0097275	-0.00146617	-0.00104878	0.00196951	0.0133947	0.120772	0.327727
MA0845.1_FOXB1	CD4+ TCM	-0.0033598	-0.00837589	-0.000402316	-0.00587933	-0.0087604	-0.00760685	0.000972314	-0.00388397	0.00274319	0.123965	0.327727
MA0074.1_RXRA::VDR	CD4+ TCM	-0.00402397	0.000540063	-0.000751455	-0.0116655	0.000321953	0.000976283	-0.00463569	0.00321497	-0.00278946	0.12411	0.327727
MA0024.3_E2F1	CD4+ TCM	0.00507284	-0.0076363	0.00594866	-0.0039333	-0.00985408	-0.00320074	0.0027328	0.00967368	0.0037467	0.125043	0.327727
MA0027.2_EN1	CD4+ TCM	0.00606004	-0.00526888	0.00465897	0.0175271	-0.00402505	-0.00775654	0.000319982	0.00289203	0.00961305	0.131422	0.327727
MA0653.1_IRF9	CD4+ TCM	0.00329355	0.0162008	0.0237949	0.0103252	0.0258367	-0.00307084	0.0142182	0.0240943	0.02983	0.132586	0.327727
MA0051.1_IRF2	CD4+ TCM	-0.000542959	0.0122405	0.0177281	0.00126727	0.0180205	0.000680421	0.0102404	0.0184681	0.0218565	0.133068	0.327727
MA0691.1_TFAP4	CD4+ TCM	0.000826789	0.00565715	-0.00160984	0.00219604	0.00565056	0.00567032	-0.00296687	-0.00129517	-0.00107228	0.133853	0.327727
MA0801.1_MGA	CD4+ TCM	-0.00362564	0.00520531	0.00380973	0.00460676	0.00596188	0.00369216	-0.000160976	0.00603255	0.00386358	0.135301	0.327727
MA0733.1_EGR4	CD4+ TCM	-0.00163595	0.00105025	-0.00269467	0.00252929	0.00241987	-0.00168897	-0.0020549	-0.00422605	-0.00133459	0.13603	0.327727
MA0797.1_TGIF2	CD4+ TCM	-0.00422377	0.00263078	-0.00922477	-0.00119423	0.0028627	0.00216694	-0.00756715	-0.00311367	-0.0174595	0.13603	0.327727
MA0757.1_ONECUT3	CD4+ TCM	-0.00060701	-0.00700437	0.00334931	-0.00717092	-0.0122297	0.00344628	0.00283856	0.00110341	0.00631003	0.137832	0.327727
MA0159.1_RARA::RXRA	CD4+ TCM	-0.00517508	0.0026633	-0.00369757	-0.0018576	0.000505872	0.00697815	-0.00585375	-0.0037947	-0.00214678	0.13961	0.327727
MA0113.3_NR3C1	CD4+ TCM	-0.0136579	-0.0089955	-0.00609007	-0.0140727	-0.00973739	-0.00751171	-0.00459639	-0.00240049	-0.0113904	0.139972	0.327727
MA0595.1_SREBF1	CD4+ TCM	0.000173767	0.0105943	0.000690283	-0.00186057	0.0132147	0.00535333	0.00262247	0.00399918	-0.00445822	0.140683	0.327727
MA0737.1_GLIS3	CD4+ TCM	-0.00622199	0.00174207	-0.00347304	0.000628766	0.000705144	0.00381594	-0.0032105	-0.00182682	-0.00556867	0.145092	0.334202
MA0665.1_MSC	CD4+ TCM	-0.0026452	0.00355002	-0.00246534	-0.00396858	0.00377469	0.00310068	0.0023286	-0.00308096	-0.00494307	0.152075	0.344543
MA0772.1_IRF7	CD4+ TCM	0.00240145	0.0109538	0.0173271	0.00738029	0.0156122	0.00163709	0.011728	0.0197878	0.018189	0.155752	0.344543
MA0139.1_CTCF	CD4+ TCM	0.0025158	-0.0177421	0.0137469	-0.00781577	-0.0203125	-0.0126012	0.0027883	0.00902988	0.0265558	0.156803	0.344543
MA0517.1_STAT1::STAT2	CD4+ TCM	0.0012375	0.00824557	0.0101659	-0.00105441	0.0116292	0.00147834	0.00751449	0.011846	0.00997324	0.157399	0.344543
MA0641.1_ELF4	CD4+ TCM	0.0012242	-0.00340031	0.000939663	-0.00154149	-0.00510308	5.23452e-06	0.00486814	0.00371356	-0.00491554	0.160014	0.344543
MA0771.1_HSF4	CD4+ TCM	-0.00370769	0.00204311	0.000185482	-0.00124441	-0.000922488	0.0079743	0.000903761	0.00169342	-0.00205263	0.160096	0.344543
MA0661.1_MEOX1	CD4+ TCM	0.0060529	-0.00914457	0.000115641	0.00849693	-0.0161644	0.00489505	-0.00304163	-0.00599249	0.00934664	0.161347	0.344543
MA0506.1_NRF1	CD4+ TCM	-0.00288002	-0.00190171	0.00440341	-0.0091008	-0.00496014	0.00421513	0.0060571	0.00809647	-0.00100763	0.164532	0.347723
MA0793.1_POU6F2	CD4+ TCM	0.00659049	-0.00473173	0.0054331	0.00455345	-0.000838787	-0.0125176	0.000960271	0.00359492	0.0105595	0.16859	0.352662
MA0140.2_GATA1::TAL1	CD4+ TCM	-0.00341976	0.000194306	-0.00847161	0.00601064	-0.00221286	0.00500863	-0.00719062	-0.00969392	-0.00789958	0.175419	0.36324
MA0112.3_ESR1	CD4+ TCM	-0.00355367	0.00503996	0.0027755	-0.00392687	0.00685434	0.00141119	0.00244547	0.00304592	0.00268004	0.179205	0.365539
MA0634.1_ALX3	CD4+ TCM	0.0023608	-0.0031665	0.00571291	0.00284408	-0.00603939	0.0025793	0.00342188	0.00380184	0.00946986	0.18042	0.365539
MA0523.1_TCF7L2	CD4+ TCM	0.0117913	0.0111812	-0.00199359	0.0122952	0.0115822	0.0103793	0.00233932	-0.000692731	-0.00639986	0.182067	0.365539
MA0719.1_RHOXF1	CD4+ TCM	-0.0108087	-0.0101609	-0.00180508	-0.0125834	-0.00984928	-0.010784	0.00543462	-0.00167187	-0.00678695	0.183661	0.365539
MA0762.1_ETV2	CD4+ TCM	0.00150318	0.00506774	-0.00421877	0.00200414	0.00264545	0.00991234	0.00271756	-0.000257342	-0.0134647	0.199232	0.389329
MA0698.1_ZBTB18	CD4+ TCM	-0.00570647	0.00241944	-0.00594757	-0.00659374	-0.00101103	0.00928037	-0.00183751	-0.00590079	-0.00874219	0.199413	0.389329
MA0861.1_TP73	CD4+ TCM	-0.00470217	0.0073054	-0.000793788	0.00354727	0.00992054	0.00207511	0.00698329	-0.0011386	-0.00557623	0.204272	0.390134
MA0846.1_FOXC2	CD4+ TCM	-0.00438862	-0.00034929	-0.000322223	-0.00341766	0.00104731	-0.0031425	0.000434347	-0.00157362	0.000633361	0.206254	0.390134
MA0510.2_RFX5	CD4+ TCM	0.0107137	-0.000172791	0.00214842	0.0119313	-0.00222771	0.00393705	0.00452351	0.00333188	-0.000815679	0.210295	0.390134
MA0914.1_ISL2	CD4+ TCM	0.00662572	-0.0022692	0.00502982	0.00582541	-0.00642731	0.00604702	0.00380338	0.00555614	0.00523341	0.210399	0.390134
MA0778.1_NFKB2	CD4+ TCM	0.00325691	0.0192728	-0.00645217	0.0256429	0.0187686	0.0202811	-0.00748961	0.000468192	-0.0138343	0.212034	0.390134
MA0130.1_ZNF354C	CD4+ TCM	-0.00188512	0.000142018	0.00149151	-0.00264014	-0.000611697	0.00164945	0.00278665	0.00163334	0.00046263	0.213338	0.390134
MA0091.1_TAL1::TCF3	CD4+ TCM	-0.00397452	-0.00794161	-0.000535159	-0.0126926	-0.00976148	-0.00430186	-0.000199827	-0.00222392	0.0012115	0.216701	0.390134
MA0685.1_SP4	CD4+ TCM	-0.00336601	-0.00254457	0.000104673	0.000250258	-0.00104878	-0.00553615	-0.000424401	-0.00268513	0.00371216	0.217623	0.390134
MA0106.3_TP53	CD4+ TCM	-0.00520996	0.00501377	-5.44973e-05	0.003334	0.00731986	0.000401598	-0.00407667	-0.0020266	0.00492774	0.218751	0.390134
MA0689.1_TBX20	CD4+ TCM	-0.000573686	0.0050098	0.0023787	-0.00179066	0.00547905	0.00407131	-0.00233079	0.00539724	0.00199672	0.218855	0.390134
MA0805.1_TBX1	CD4+ TCM	-0.00319215	0.00559728	0.00282818	-0.000920325	0.00444981	0.00789223	0.00391398	0.00510697	-0.000554279	0.221272	0.390848
MA0639.1_DBP	CD4+ TCM	-0.00959205	-0.00160335	0.00366591	-0.0012962	-0.00217577	-0.000458503	-0.00805666	0.00926511	0.00494856	0.22307	0.390848
MA0855.1_RXRB	CD4+ TCM	-0.000668673	0.00289746	0.00123466	-0.00656132	0.0013727	0.00594696	0.000546175	0.0012202	0.00171051	0.240979	0.418649
MA0687.1_SPIC	CD4+ TCM	0.00209155	0.00305972	-0.00158224	0.00108253	0.00343748	0.0023042	0.00273197	-0.000897841	-0.00525684	0.258867	0.445948
MA0755.1_CUX2	CD4+ TCM	0.00309922	-0.000115531	0.0108021	0.00399515	0.00118606	-0.00271872	0.00487056	0.00721093	0.0189461	0.271494	0.451037
MA0031.1_FOXD1	CD4+ TCM	-0.00530605	0.00289566	-0.000805615	0.000370485	0.00372823	0.00123051	-0.00497216	0.00359585	-0.00316296	0.272059	0.451037
MA0660.1_MEF2B	CD4+ TCM	-0.00157849	0.00180056	0.00921635	0.000859812	0.00152739	0.0023469	0.00632555	0.0116068	0.00835466	0.274592	0.451037
MA0088.2_ZNF143	CD4+ TCM	-0.000631307	-0.00459581	0.00249098	-0.00363353	-0.00346218	-0.00686305	0.00719119	0.00200889	-8.00405e-05	0.286513	0.451037
MA0593.1_FOXP2	CD4+ TCM	-0.00519663	0.00228838	-0.00175251	-0.00195819	0.0038136	-0.000762054	-0.00250316	0.000606059	-0.00400375	0.287058	0.451037
MA0157.2_FOXO3	CD4+ TCM	-0.00512162	0.00399212	-0.00139279	-0.00159526	0.00561919	0.000737979	-0.00587118	0.00296368	-0.00348973	0.287121	0.451037
MA0032.2_FOXC1	CD4+ TCM	-0.00429676	-0.00591812	-0.00118857	-0.00676155	-0.00587045	-0.00601347	-8.42068e-05	-0.00418324	0.00156897	0.28714	0.451037
MA0042.2_FOXI1	CD4+ TCM	-0.00551873	0.00168523	-0.00226375	-0.00171309	0.00313529	-0.00121487	-0.00456873	0.000904953	-0.00442391	0.287562	0.451037
MA0848.1_FOXO4	CD4+ TCM	-0.00551873	0.00168523	-0.00226375	-0.00171309	0.00313529	-0.00121487	-0.00456873	0.000904953	-0.00442391	0.287562	0.451037
MA0849.1_FOXO6	CD4+ TCM	-0.00551873	0.00168523	-0.00226375	-0.00171309	0.00313529	-0.00121487	-0.00456873	0.000904953	-0.00442391	0.287562	0.451037
MA0850.1_FOXP3	CD4+ TCM	-0.00551873	0.00168523	-0.00226375	-0.00171309	0.00313529	-0.00121487	-0.00456873	0.000904953	-0.00442391	0.287562	0.451037
MA0819.1_CLOCK	CD4+ TCM	-0.00274674	0.0062337	0.00311096	-0.00139897	0.00342491	0.0118513	0.00386703	0.00227482	0.00358242	0.288518	0.451037
MA0645.1_ETV6	CD4+ TCM	0.00242252	-0.00105812	-0.00257452	0.0015853	-0.0030972	0.00302003	0.0019683	2.93564e-05	-0.00864091	0.290818	0.451037
MA0763.1_ETV3	CD4+ TCM	-5.83995e-05	-0.00370958	0.00208021	-0.0058009	-0.00576416	0.000399589	0.00496974	0.00530337	-0.0036065	0.293655	0.451037
MA0259.1_ARNT::HIF1A	CD4+ TCM	-0.00131256	0.000396321	0.00358066	-0.00238291	-0.000185954	0.00156087	0.0029834	0.00542531	0.00182676	0.297025	0.451037
MA0758.1_E2F7	CD4+ TCM	-0.00264611	-0.00246458	0.0019557	-0.0102016	-0.00239475	-0.00260425	0.00419721	-0.00157315	0.00457834	0.297025	0.451037
MA0600.2_RFX2	CD4+ TCM	0.0106284	0.00222294	0.00200918	0.0115545	0.00139154	0.00388575	0.00179924	0.00344153	0.000478053	0.300867	0.451875
MA0839.1_CREB3L1	CD4+ TCM	0.00205648	0.00678549	0.00276416	0.00253046	0.00522648	0.00990349	0.00142337	0.00718343	-0.00149778	0.301985	0.451875
MA0664.1_MLXIPL	CD4+ TCM	0.0017374	-0.0025	0.00406407	-0.00236449	-0.00269805	-0.0021039	0.00483967	0.00832105	-0.00141947	0.3092	0.459319
MA0625.1_NFATC3	CD4+ TCM	-0.00101354	-0.000412744	0.00518546	0.00089224	-0.000152115	-0.000934001	0.00415878	0.00690007	0.00386953	0.313403	0.462214
MA0486.2_HSF1	CD4+ TCM	-0.00459096	-0.00125874	0.000541932	-0.00583002	-0.00377621	0.00377619	0.00258431	0.000855747	-0.00118577	0.316784	0.463862
MA0138.2_REST	CD4+ TCM	-0.000509941	0.000974516	0.00191488	-0.00265904	-0.00100146	0.00492646	0.00168186	0.00102018	0.00311405	0.323201	0.465379
MA0527.1_ZBTB33	CD4+ TCM	0.00157908	-0.00276037	0.00335038	-0.00668744	-0.00372335	-0.000834407	0.00305404	0.0013399	0.0058935	0.323629	0.465379
MA0105.4_NFKB1	CD4+ TCM	0.00128919	0.0147838	-0.00607957	0.0200995	0.0171244	0.0101025	-0.00545088	0.00229733	-0.0162718	0.32463	0.465379
MA0652.1_IRF8	CD4+ TCM	0.00663084	0.0224715	0.0243694	0.00705652	0.0303813	0.00665199	0.0174017	0.0240557	0.0293805	0.334542	0.476258
MA0504.1_NR2C2	CD4+ TCM	-0.00291264	2.33618e-05	-0.00231864	-0.00138112	-0.00161003	0.00329015	-0.000440455	-0.00280181	-0.00300706	0.338468	0.478524
MA0895.1_HMBOX1	CD4+ TCM	0.00553882	0.00216701	0.00903351	-0.00111198	-0.00181412	0.0101293	0.0097472	0.0120699	0.00501523	0.34938	0.490568
MA0834.1_ATF7	CD4+ TCM	-0.000764379	0.00338342	0.0056601	-0.00484945	0.00336282	0.00342463	0.00385544	0.00793842	0.00420517	0.358131	0.499435
MA0076.2_ELK4	CD4+ TCM	0.00109708	-0.00134248	-0.000568948	-0.00182425	-0.00306847	0.00210951	0.0041604	0.0022884	-0.00705542	0.363851	0.503983
MA0670.1_NFIA	CD4+ TCM	-0.00358455	-0.00419479	-0.0011959	-0.0111165	-0.00811868	0.00365297	0.00108409	0.000699743	-0.00492748	0.371312	0.510865
MA0799.1_RFX4	CD4+ TCM	0.00945646	0.00189609	0.00404449	0.00930894	0.00182209	0.00204409	0.00501484	0.00579405	0.00135643	0.378627	0.513789
MA0695.1_ZBTB7C	CD4+ TCM	-0.00233245	0.000670233	-0.00140349	-0.00265901	-0.000141477	0.00229365	0.00202042	0.000137726	-0.00548419	0.380762	0.513789
MA0843.1_TEF	CD4+ TCM	-0.00720735	-0.00509556	0.00186257	-0.00747577	-0.00749272	-0.000301245	-0.00243886	0.00329965	0.0030536	0.380956	0.513789
MA0145.3_TFCP2	CD4+ TCM	0.00202742	-0.00461472	0.0044334	0.00932012	-0.00838753	0.0029309	-0.00426973	0.00761277	0.00652622	0.404669	0.538688
MA0498.2_MEIS1	CD4+ TCM	-0.00320698	0.00140857	-0.00308708	-0.00885878	2.24379e-05	0.00418083	-0.00247735	-0.00500972	-0.00125047	0.404673	0.538688
MA0768.1_LEF1	CD4+ TCM	0.00993487	0.0072417	-0.0015906	0.014045	0.00758195	0.00656119	0.00210472	-9.31046e-05	-0.00580124	0.427628	0.565572
MA0141.3_ESRRB	CD4+ TCM	-0.00333369	0.00213304	-0.000380189	-0.00826473	-0.000623263	0.00764564	-0.000415899	0.000679616	-0.00159282	0.430832	0.566158
MA0597.1_THAP1	CD4+ TCM	0.000471883	0.00256698	-0.00123941	0.00331523	0.00101887	0.00566318	-0.00433716	-0.00244683	0.00223443	0.434488	0.567326
MA0796.1_TGIF1	CD4+ TCM	-0.00686926	-0.00315323	-0.0117567	2.90124e-05	-0.00363093	-0.00219781	-0.0101541	-0.00676606	-0.0186474	0.440799	0.571923
MA0795.1_SMAD3	CD4+ TCM	0.00641032	0.0253974	-0.00165013	0.0218869	0.0168771	0.0424382	-0.00438803	0.00813299	-0.0112385	0.45466	0.586197
MA0647.1_GRHL1	CD4+ TCM	0.000440074	0.00471077	0.00243095	0.00605342	0.00415386	0.00582458	0.0014257	0.00640433	-0.00153448	0.489635	0.621263
MA0136.2_ELF5	CD4+ TCM	0.00193752	-0.00145211	-0.00214164	-0.00133176	-0.00384197	0.00332759	0.00165604	-0.00119432	-0.00577863	0.490633	0.621263
MA0752.1_ZNF410	CD4+ TCM	0.000320096	-0.00255554	0.00234829	-0.000935261	-0.000972312	-0.005722	-2.99826e-06	-0.00447443	0.0118757	0.490949	0.621263
MA0731.1_BCL6B	CD4+ TCM	-0.00358407	0.00107831	0.000892573	-0.00731521	-0.000817756	0.00487043	0.00119047	9.06792e-05	0.00162952	0.508769	0.639863
MA0826.1_OLIG1	CD4+ TCM	-0.00624311	-0.00516015	0.000770158	0.00833798	-0.00735804	-0.000764367	0.0126173	0.00219282	-0.0087877	0.528756	0.660945
MA0488.1_JUN	CD4+ TCM	0.00132625	0.00834382	0.00198387	0.00315826	0.00945714	0.00611718	-0.00148059	0.00528999	0.000436387	0.538151	0.668612
MA0663.1_MLX	CD4+ TCM	0.000590897	0.000168459	0.00440412	-0.00204832	-0.000442383	0.00139014	0.00251852	0.00729666	0.00228656	0.549499	0.678319
MA0636.1_BHLHE41	CD4+ TCM	0.00014867	0.000591537	0.00383441	-0.00614391	-0.000396209	0.00256703	0.00676771	0.00622484	-0.000909947	0.562921	0.678319
MA0071.1_RORA	CD4+ TCM	-0.0112183	-0.0068076	-0.00986511	-0.00186866	-0.00881814	-0.00278654	-0.0116161	-0.00589986	-0.0133239	0.563965	0.678319
MA0844.1_XBP1	CD4+ TCM	0.0073734	0.0143737	0.00767574	0.0201192	0.0144478	0.0142256	0.00157226	0.00958272	0.00951993	0.563965	0.678319
MA0472.2_EGR2	CD4+ TCM	-0.0012873	-0.000236352	-0.00284567	-1.71255e-06	0.000263401	-0.00123586	-0.00134393	-0.00296934	-0.00370255	0.565299	0.678319
MA0732.1_EGR3	CD4+ TCM	-0.00149096	-0.000107762	-0.00206206	0.00148513	0.000944293	-0.00221187	0.000105112	-0.00435504	-0.000831713	0.565818	0.678319
MA0727.1_NR3C2	CD4+ TCM	-0.00703477	-0.0124265	-0.00656331	-0.013691	-0.012193	-0.0128933	-0.000116038	-0.00335401	-0.0146057	0.582337	0.694065
MA0808.1_TEAD3	CD4+ TCM	-0.00734157	-0.00481212	-0.00335237	-0.00907497	-0.00700415	-0.000428046	-0.00423284	-0.00186356	-0.00450234	0.605829	0.71789
MA0464.2_BHLHE40	CD4+ TCM	2.30127e-05	-0.00175723	0.00315898	-0.00948673	-0.00353886	0.00180603	0.00560764	0.00627788	-0.00211219	0.631396	0.743886
MA0749.1_ZBED1	CD4+ TCM	-0.000718717	-0.00155204	0.00264231	-0.00884077	-0.0021242	-0.000407714	0.0121062	0.00285065	-0.00390999	0.646123	0.756887
MA0802.1_TBR1	CD4+ TCM	-0.00259626	0.0022088	0.000189654	0.00258585	-0.000726349	0.0080791	0.00349072	0.000827056	-0.00275469	0.706457	0.820716
MA0754.1_CUX1	CD4+ TCM	0.0043839	-9.2919e-05	0.0107186	0.00380908	-0.00327594	0.00627313	-0.00182233	0.00432926	0.0265334	0.708618	0.820716
MA0776.1_MYBL1	CD4+ TCM	0.00798386	0.0086154	0.00715666	0.00830253	0.00890469	0.00803683	0.00465046	0.0112909	0.0040042	0.719558	0.828705
MA0646.1_GCM1	CD4+ TCM	-0.00428194	-0.00527545	-0.00175985	-0.0038394	-0.00801476	0.000203176	0.000172907	0.00330717	-0.00895988	0.729365	0.835307
MA0638.1_CREB3	CD4+ TCM	0.00315707	0.00553513	0.006022	0.00173191	0.00258729	0.0114308	0.00237625	0.00661617	0.00775931	0.740841	0.843735
MA0152.1_NFATC2	CD4+ TCM	-0.00100177	0.00187056	0.00251664	-0.00238884	-0.00032059	0.00625286	0.000286638	0.0042229	0.00201268	0.751093	0.850686
MA0865.1_E2F8	CD4+ TCM	-0.00375473	-0.00311142	-0.00162475	-0.00124492	-0.0056354	0.00193654	0.00226583	-0.00456063	-0.000793294	0.757099	0.850781
MA0760.1_ERF	CD4+ TCM	-0.000833324	0.00139901	-0.000894436	0.00065634	-0.000186288	0.00456962	0.00426358	0.00172218	-0.00738583	0.759478	0.850781
MA0841.1_NFE2	CD4+ TCM	0.0221189	0.0265772	0.00402291	0.0414218	0.0273672	0.0249972	-0.0213	0.0175021	0.00517909	0.769074	0.856849
MA0475.2_FLI1	CD4+ TCM	-0.00172911	0.000117353	0.000633356	-0.00408823	-0.00190932	0.0041707	0.00603179	0.00362522	-0.0064561	0.77975	0.860793
MA0655.1_JDP2	CD4+ TCM	0.0219735	0.03307	0.00575809	0.0438322	0.0352098	0.0287906	-0.0268158	0.0147956	0.0169302	0.781012	0.860793
MA0476.1_FOS	CD4+ TCM	0.0215732	0.0243446	0.00299763	0.0440048	0.0230485	0.0269369	-0.0243479	0.0136854	0.0087589	0.785416	0.861017
MA0800.1_EOMES	CD4+ TCM	0.00370557	0.00529376	0.0044813	-0.00371237	0.00360689	0.00866748	0.00143252	0.00446179	0.00653657	0.798902	0.869952
MA0478.1_FOSL2	CD4+ TCM	0.0180509	0.0271821	0.00157854	0.0464232	0.0271605	0.0272254	-0.0209445	0.0128792	0.00340977	0.802053	0.869952
MA0690.1_TBX21	CD4+ TCM	-0.000368515	0.000684418	0.00220197	-0.00722324	0.000939112	0.000175031	0.00627953	0.00184176	-9.61479e-05	0.808249	0.872059
MA0524.2_TFAP2C	CD4+ TCM	0.00103124	-0.000260375	0.000465031	0.00161338	-0.000598858	0.000416591	0.00120061	0.00122929	-0.000916992	0.838012	0.899437
MA0777.1_MYBL2	CD4+ TCM	0.00497209	0.000958435	0.00164931	0.0128938	-0.00106828	0.00501186	0.00148893	0.00232257	0.000970751	0.844177	0.900769
MA0694.1_ZBTB7B	CD4+ TCM	-0.00209125	-0.00181467	-0.00274887	-0.00271331	-0.00243104	-0.000581926	0.000578001	-0.00392317	-0.00359675	0.851774	0.900769
MA0668.1_NEUROD2	CD4+ TCM	-0.00115753	-0.00419361	-0.00219983	0.000106878	-0.00968207	0.00678332	0.00502739	-0.00522317	-0.00349076	0.853559	0.900769
MA0692.1_TFEB	CD4+ TCM	-0.00149813	-0.000760105	0.000502791	-0.000594369	-2.51561e-05	-0.00223	-0.0014289	0.00370453	-0.00194478	0.856829	0.900769
MA0501.1_MAF::NFE2	CD4+ TCM	0.00804803	0.0104235	0.00506205	0.0263381	0.00916229	0.012946	-0.00600683	0.00802584	0.00898356	0.86496	0.904678
MA0688.1_TBX2	CD4+ TCM	-0.000300438	0.0060845	0.00520282	0.00569894	0.00473769	0.00877812	0.00731565	0.0060783	0.00277287	0.874078	0.908759
MA0083.3_SRF	CD4+ TCM	0.00205975	0.00534909	0.00098817	0.00875393	0.00464906	0.00674916	-0.0046248	0.00376631	0.00148899	0.877728	0.908759
MA0479.1_FOXH1	CD4+ TCM	-0.000340888	-0.00138534	-0.0022465	0.000503793	-0.00232245	0.000488882	-0.000807083	-0.00313062	-0.00217463	0.923503	0.944556
MA0671.1_NFIX	CD4+ TCM	-0.00409373	-0.00575284	-0.00476937	-0.00155395	-0.00587629	-0.00550593	-0.000869938	-0.00604649	-0.00587901	0.92421	0.944556
MA0115.1_NR1H2::RXRA	CD4+ TCM	0.000780396	0.00355461	0.00230187	-0.00402525	0.00282997	0.0050039	-0.00213601	0.00508954	0.00200817	0.926125	0.944556
MA0863.1_MTF1	CD4+ TCM	0.0024958	0.00307581	0.000872636	-0.00449457	-0.000128504	0.00948445	-0.000156139	0.00462088	-0.00281446	0.940079	0.954041
MA0525.2_TP63	CD4+ TCM	-0.00324248	-0.0023395	-0.0039314	-0.0077488	-0.00237433	-0.00226985	0.00433205	-0.00789471	-0.00481649	0.972618	0.9822
MA0637.1_CENPB	CD4+ TCM	0.000947464	-0.000941468	0.00237242	-0.00754498	-0.000413666	-0.00199707	0.00100291	0.00453962	0.000757019	0.986536	0.986684
MA0098.3_ETS1	CD4+ TCM	-1.30624e-05	0.000971119	0.00044541	-0.00192609	-0.00163855	0.00619046	0.00444212	0.00354865	-0.00583951	0.986684	0.986684
MA0130.1_ZNF354C	Tfh	-0.00319861	-0.00623689	0.00566702	-0.00599548	-0.00471077	-0.00928913	0.000615854	0.00969518	0.00406853	0.00139957	0.255661	0.620928	0.00480689	0.00172671	0.620928	0.00721034	0.00518013
MA0095.2_YY1	Tfh	-0.0175354	-0.0123492	0.00768039	-0.0204929	-0.0154323	-0.00618307	0.0127015	0.00672532	0.00500061	0.00265339	0.255661	0.766679	0.00344338	0.00574101	0.766679	0.00861152	0.00861152
MA0801.1_MGA	Tfh	-0.01396	0.0258252	-0.00748201	0.0168422	0.0325398	0.0123958	-0.00651439	-0.0175188	0.00579537	0.00470065	0.255661	0.00412677	0.304072	0.00997996	0.0123803	0.304072	0.0149699
MA0719.1_RHOXF1	Tfh	-0.0286183	-0.00313817	0.00240797	-0.0205057	-0.00962541	0.00983632	-0.00236691	0.00191006	0.00692495	0.00769327	0.255661	0.0229142	0.00407364	0.296237	0.0343713	0.0122209	0.296237
MA0048.2_NHLH1	Tfh	0.00632115	0.0065569	-0.00744925	-0.00374744	0.0066516	0.00636752	-0.0116614	-0.00713327	-0.00452191	0.00804703	0.255661	0.921212	0.00664183	0.0147994	0.921212	0.0199255	0.0221991
MA0653.1_IRF9	Tfh	-0.0136437	0.0205081	0.00503132	-0.0309212	0.0258425	0.00983929	-0.000534025	0.0202327	-0.0117983	0.00899412	0.255661	0.00173586	0.0867309	0.170842	0.00520758	0.130096	0.170842
MA0625.1_NFATC3	Tfh	-0.0198617	0.0082527	-0.00623268	0.00380442	0.00899714	0.00676382	-0.00274306	-0.006806	-0.00822172	0.00962244	0.255661	0.00919942	0.0968751	0.0346621	0.0275983	0.0968751	0.0519931
MA0074.1_RXRA::VDR	Tfh	-0.00470487	0.0195007	0.001216	-0.00581457	0.0193876	0.0197271	-0.00761593	0.0101088	-0.00416834	0.009977	0.255661	0.0192424	0.413973	0.0066117	0.0288637	0.413973	0.0198351
MA0511.2_RUNX2	Tfh	0.0388612	0.0215359	0.00706227	0.0385109	0.0281487	0.00831043	-0.00743231	0.0127814	0.0106512	0.0195575	0.445477	0.0697861	0.0190089	0.0817022	0.0817022	0.0570268	0.0817022
MA0805.1_TBX1	Tfh	-0.027184	0.0102511	-0.0151001	-0.00446368	0.0129138	0.00492566	-0.0087784	-0.0352402	0.00803863	0.0242837	0.455355	0.00919942	0.304072	0.0666924	0.0275983	0.304072	0.100039
MA0652.1_IRF8	Tfh	-0.014105	0.0197728	0.0157939	-0.0175291	0.0252168	0.00888486	0.0143459	0.0300046	-0.0029428	0.0277085	0.455355	0.00334362	0.107947	0.530842	0.0100309	0.16192	0.530842
MA0663.1_MLX	Tfh	-0.00688125	-0.0052717	0.00815788	-0.0138176	-0.007376	-0.0010631	0.00449126	0.0122255	0.00539647	0.0289816	0.455355	0.921212	0.0373577	0.0215629	0.921212	0.0560366	0.0560366
MA0772.1_IRF7	Tfh	-0.00761936	0.0180633	0.0102644	-0.0155277	0.0180219	0.0181459	0.0131221	0.022568	-0.00924678	0.0296928	0.455355	0.0192424	0.0690168	0.170842	0.0577273	0.103525	0.170842
MA0776.1_MYBL1	Tfh	-0.0241464	0.0208176	0.0016018	-0.0434781	0.0155994	0.031254	-0.0207968	0.0217062	-0.00862544	0.0310974	0.455355	0.0134105	0.147232	0.131356	0.0402316	0.147232	0.147232
MA0688.1_TBX2	Tfh	-0.0151557	0.0130501	-0.0119038	-0.0106407	0.00840515	0.0223401	-0.00782667	-0.0262232	0.00488168	0.04207	0.515196	0.0271799	0.544446	0.0434418	0.0651628	0.544446	0.0651628
MA0657.1_KLF13	Tfh	-0.00353022	0.000498711	0.010181	0.0102926	0.000125408	0.00124532	0.00871472	0.00926597	0.012635	0.0452869	0.515196	0.869066	0.0424452	0.0388416	0.869066	0.0636679	0.0636679
MA0791.1_POU4F3	Tfh	0.00225846	-0.0073899	0.0117962	-0.0174212	-0.00948704	-0.00319562	0.0133176	0.00793455	0.0159853	0.0468535	0.515196	0.448279	0.544446	0.00574101	0.544446	0.544446	0.017223
MA0523.1_TCF7L2	Tfh	-0.023671	-0.0421104	-0.059489	-0.0237243	-0.0372567	-0.0518179	-0.0660923	-0.0636419	-0.0483922	0.0481809	0.515196	0.121251	0.0190089	0.341255	0.181876	0.0570268	0.341255
MA0595.1_SREBF1	Tfh	0.00119037	0.0244512	0.0121891	0.00580442	0.0270166	0.0193205	0.00749943	0.0154481	0.0113781	0.0483111	0.515196	0.0377971	0.133076	0.109239	0.113391	0.133076	0.133076
MA0691.1_TFAP4	Tfh	0.00744846	-0.00388463	0.0158366	0.0173614	-0.00977575	0.00789759	0.0189001	-0.00153147	0.037701	0.050263	0.515196	0.22252	0.384505	0.0147994	0.33378	0.384505	0.0443982
MA0729.1_RARA	Tfh	-0.00349704	0.0100215	0.0182591	0.0106095	0.00929899	0.0114664	0.0281212	0.018809	0.00959974	0.0671658	0.568179	0.276605	0.0190089	0.318225	0.318225	0.0570268	0.318225
MA0768.1_LEF1	Tfh	-0.0181677	-0.0376158	-0.0532763	-0.0178137	-0.0279743	-0.056899	-0.0583381	-0.0547761	-0.0471272	0.0696759	0.568179	0.248535	0.0218681	0.318225	0.318225	0.0656043	0.318225
MA0821.1_HES5	Tfh	-0.00320258	0.0177864	0.0147019	-0.0060848	0.016098	0.0211632	0.0142324	0.0210057	0.00625217	0.0703669	0.568179	0.0377971	0.0613431	0.625939	0.0920147	0.0920147	0.625939
MA0675.1_NKX6-2	Tfh	0.00185873	-0.0259285	-0.00010479	-0.000998453	-0.0387117	-0.00036219	0.00855208	-0.012055	0.0097	0.0705952	0.568179	0.0926813	0.692633	0.0308728	0.139022	0.692633	0.0926184
MA0795.1_SMAD3	Tfh	-0.00917486	0.0284328	-0.0242401	-0.0040224	0.0347513	0.0157958	-0.0189359	-0.0305378	-0.0196669	0.0798129	0.568179	0.276605	0.356356	0.0274448	0.356356	0.356356	0.0823345
MA0674.1_NKX6-1	Tfh	0.00369722	-0.0205724	0.000462227	0.00348572	-0.0270609	-0.0075954	0.0149522	-0.00908166	0.00223172	0.0820698	0.568179	0.106206	0.731914	0.0346621	0.159309	0.731914	0.103986
MA0112.3_ESR1	Tfh	0.00932255	0.0300682	0.0141879	0.00498362	0.0324583	0.0252882	0.0127121	0.0205051	0.00652442	0.0848573	0.568179	0.0517542	0.510019	0.0817022	0.122553	0.510019	0.122553
MA0524.2_TFAP2C	Tfh	-0.00053355	0.00743945	0.00746945	-8.47478e-05	0.00965595	0.00300644	0.00283436	0.0103434	0.00715393	0.0857885	0.568179	0.198516	0.0164821	0.944484	0.297774	0.0494464	0.944484
MA0083.3_SRF	Tfh	0.0266479	0.0176233	0.00283994	0.0179304	0.0202083	0.0124532	-0.00149484	0.00512571	0.00310768	0.0897332	0.568179	0.531045	0.0424452	0.143645	0.531045	0.127336	0.215468
MA0141.3_ESRRB	Tfh	0.000984742	0.0156723	0.00984581	0.0335318	0.0154944	0.0160279	0.00755359	0.0206564	-0.00345523	0.0920002	0.568179	0.0377971	0.147232	0.365325	0.113391	0.220848	0.365325
MA0781.1_PAX9	Tfh	-0.00681391	0.00715459	-6.86616e-06	-0.000784453	0.0161733	-0.0108828	-0.00555312	0.00435442	-0.00167566	0.0929298	0.568179	0.0517542	0.476767	0.0993432	0.149015	0.476767	0.149015
MA0863.1_MTF1	Tfh	-0.0134323	0.00276107	0.000337711	-0.010022	0.000403393	0.00747642	-0.00710556	-0.00359827	0.0118027	0.0931574	0.568179	0.156288	0.0287249	0.693136	0.234432	0.0861746	0.693136
MA0088.2_ZNF143	Tfh	-0.0045664	-0.000618554	0.0077303	-0.00610698	0.00418608	-0.0102278	0.0113743	0.00980163	0.00191524	0.0940225	0.568179	0.869066	0.0218681	0.21861	0.869066	0.0656043	0.327916
MA0862.1_GMEB2	Tfh	-0.0165094	-0.00845215	0.00559177	-0.00562969	-0.0054675	-0.0144215	0.000969308	0.0223331	-0.0141481	0.0963345	0.568179	0.973699	0.0613431	0.090176	0.973699	0.135264	0.135264
MA0819.1_CLOCK	Tfh	-0.0101975	-0.000486534	0.0108024	-0.00102186	0.000179752	-0.00181911	0.000728728	0.00169794	0.0316075	0.100611	0.568179
MA0685.1_SP4	Tfh	0.00106679	-0.00210309	0.00424849	0.00534817	-0.000446293	-0.00541669	0.00284002	0.0033311	0.00665962	0.100885	0.568179
MA0754.1_CUX1	Tfh	-0.0207492	-0.00600553	0.00880128	0.0182798	-0.016281	0.0145454	0.00487723	0.010314	0.00982265	0.103252	0.568179
MA0596.1_SREBF2	Tfh	0.00777015	0.0222263	0.0193733	0.00905023	0.0258663	0.0149465	0.0168822	0.0303231	0.00603634	0.105321	0.568179
MA0059.1_MAX::MYC	Tfh	-0.000581282	0.00726001	0.0108176	0.00545742	0.00987843	0.00202318	0.00153479	0.0130422	0.0151294	0.115026	0.601865
MA0895.1_HMBOX1	Tfh	-0.00322407	-0.0155537	0.0141274	-0.0263811	-0.0224213	-0.00181846	0.0261573	0.00642483	0.0152869	0.119899	0.601865
MA0838.1_CEBPG	Tfh	-0.0044307	-0.000208611	0.0182661	-6.03125e-05	-0.00702618	0.0134265	0.00706866	0.0268953	0.0151431	0.127337	0.601865
MA0628.1_POU6F1	Tfh	0.0262731	-0.00267059	0.00438861	0.00155139	-0.00486066	0.00170954	0.0214792	-0.00285058	0.000850995	0.127654	0.601865
MA0757.1_ONECUT3	Tfh	-0.00240468	-0.011231	0.00592075	-0.00528093	-0.0168802	6.7509e-05	0.017395	-0.00802267	0.0162621	0.129057	0.601865
MA0488.1_JUN	Tfh	0.0141402	0.0286748	0.0150017	0.00607502	0.033176	0.0196725	0.0128967	0.0196887	0.0101239	0.129181	0.601865
MA0875.1_BARX1	Tfh	-0.011987	0.0136157	-0.00432328	-0.0257155	0.0247433	-0.00863944	0.0105735	0.00121846	-0.0239991	0.141929	0.637072
MA0707.1_MNX1	Tfh	-0.00495747	-0.017871	0.00386969	-0.0142004	-0.0140401	-0.0255328	0.0109234	-0.00476713	0.0103183	0.146255	0.637072
MA0790.1_POU4F1	Tfh	-0.00409605	-0.0150004	0.00240357	-0.0165948	-0.0217625	-0.0014763	0.0096698	-0.00914357	0.0127566	0.147953	0.637072
MA0690.1_TBX21	Tfh	-0.0128158	0.00415143	-0.0111275	-0.0144488	0.00331414	0.005826	0.00139297	-0.0337158	0.0104799	0.149168	0.637072
MA0692.1_TFEB	Tfh	-0.00658523	0.00101895	0.00273637	0.00015457	0.00324737	-0.0034379	0.00158819	0.00696869	-0.00227035	0.153288	0.641306
MA0802.1_TBR1	Tfh	-0.0180281	0.00652242	-0.0119429	-0.00946572	0.00443638	0.0106945	-0.0074544	-0.0297108	0.00934137	0.159936	0.655739
MA0163.1_PLAG1	Tfh	-0.00185733	0.00732005	0.00453135	0.00449782	0.00668403	0.0085921	0.00739906	-0.00180252	0.0111046	0.173203	0.665378
MA0777.1_MYBL2	Tfh	0.00344076	-0.0125094	-0.0221514	-0.00458136	-0.0126741	-0.0121801	-0.0199252	-0.013831	-0.0355807	0.173742	0.665378
MA0144.2_STAT3	Tfh	0.00495512	0.0045465	0.0130388	0.00474433	0.00572644	0.0021866	0.0069492	0.00747082	0.0257056	0.174376	0.665378
MA0834.1_ATF7	Tfh	0.00129123	0.0150331	0.012936	-0.00928165	0.018251	0.00859713	0.0100908	0.0156701	0.0113845	0.176838	0.665378
MA0755.1_CUX2	Tfh	-0.0150312	0.00830181	0.0120782	0.0193479	0.0121855	0.00053452	0.0285222	0.00895824	0.00329099	0.178516	0.665378
MA0727.1_NR3C2	Tfh	-0.0233328	-0.0199971	-0.0050067	-0.00550908	-0.0233793	-0.0132327	-0.0089435	-0.0134919	0.010022	0.183846	0.673007
MA0066.1_PPARG	Tfh	0.0158925	0.0319042	0.00978972	0.0213788	0.0293827	0.0369472	0.0310697	-0.00256932	0.0100684	0.195225	0.685974
MA0825.1_MNT	Tfh	0.00105678	0.00889741	0.0120632	0.00925551	0.010196	0.00630016	-0.00149402	0.0167865	0.0162962	0.199651	0.685974
MA0799.1_RFX4	Tfh	0.00560746	0.0190528	0.0132892	0.00997127	0.0259114	0.00533564	0.0154644	0.0161524	0.00754047	0.200891	0.685974
MA0903.1_HOXB3	Tfh	0.0125332	-0.00929319	-0.00139238	0.0014021	-0.0109997	-0.00588018	0.00473991	-0.00534479	-0.000764829	0.202551	0.685974
MA0671.1_NFIX	Tfh	0.00949512	0.0041889	-0.00812155	0.00315953	-0.00742794	0.0274226	-0.0148769	-0.0294386	0.0271266	0.204119	0.685974
MA0600.2_RFX2	Tfh	0.00252677	0.0181189	0.0122427	0.0133516	0.0203833	0.0135901	0.0259887	0.0117632	0.00191713	0.209519	0.692766
MA0145.3_TFCP2	Tfh	0.00192464	-0.0106988	-0.00132241	0.0415507	-0.0131827	-0.00573108	-0.00231516	-0.00048634	-0.00169871	0.221633	0.710074
MA0773.1_MEF2D	Tfh	-0.000334217	0.00681496	0.00815805	-0.000264414	0.00825337	0.00393815	0.0162514	0.00293633	0.00899375	0.224675	0.710074
MA0800.1_EOMES	Tfh	-0.0160532	0.010283	-0.0139496	-0.00134087	0.0104784	0.0098922	0.000333658	-0.0412307	0.0128173	0.230557	0.710074
MA0666.1_MSX1	Tfh	-0.00661671	-0.00169239	0.00820185	0.00882415	-0.00299929	0.000921411	0.0020424	0.00804007	0.0133559	0.241496	0.710074
MA0708.1_MSX2	Tfh	-0.00661671	-0.00169239	0.00820185	0.00882415	-0.00299929	0.000921411	0.0020424	0.00804007	0.0133559	0.241496	0.710074
MA0058.3_MAX	Tfh	0.000760426	-7.20249e-05	0.0104928	0.01374	0.00826963	-0.0167553	-0.000350598	0.0101308	0.0196744	0.243673	0.710074
MA0731.1_BCL6B	Tfh	0.00113947	0.00604311	0.0164953	-0.00202491	0.0122268	-0.0063242	0.00718739	0.0258616	0.0108288	0.250082	0.710074
MA0101.1_REL	Tfh	0.0263158	0.0329602	0.0168053	0.0482493	0.0425588	0.013763	0.00517327	0.0365781	-0.00157109	0.250255	0.710074
MA0032.2_FOXC1	Tfh	-0.0016614	-0.0121748	-0.00190594	-0.00262784	-0.0112734	-0.0139775	-0.00223419	-0.00303468	-6.30854e-05	0.250272	0.710074
MA0517.1_STAT1::STAT2	Tfh	-0.00460249	0.00436321	0.00117583	-0.00816964	0.00446074	0.00416816	0.00365191	0.00754874	-0.0097271	0.251589	0.710074
MA0152.1_NFATC2	Tfh	-0.00683302	0.00305341	-0.00246335	0.00438221	-0.00116651	0.0114933	-0.0095536	0.00197838	-0.00300956	0.256098	0.710074
MA0792.1_POU5F1B	Tfh	0.00574979	-0.00172095	0.00900344	-0.0076051	-9.70284e-05	-0.0049688	0.0118787	0.00335553	0.0146103	0.257427	0.710074
MA0843.1_TEF	Tfh	-0.0166896	-0.00337864	0.00122123	-0.0304764	-0.0121433	0.0141507	-0.00452247	0.0156117	-0.0143305	0.259783	0.710074
MA0136.2_ELF5	Tfh	-0.00046391	-0.00437962	0.00556736	-0.00571381	-0.00753322	0.0019276	0.00738846	0.0114363	-0.00410606	0.266949	0.716028
MA0105.4_NFKB1	Tfh	0.0145225	0.0319574	0.01237	0.0523287	0.0354573	0.0249576	0.0142408	0.0182779	0.00260216	0.26946	0.716028
MA0507.1_POU2F2	Tfh	0.00294121	-0.00166021	0.00375928	-0.00999983	0.00091086	-0.00680235	0.0102098	-0.00475968	0.0105254	0.27244	0.716028
MA0855.1_RXRB	Tfh	-0.00177686	-0.00145081	0.00911288	-0.00977543	-0.00368512	0.00301779	0.01018	0.0116127	0.00475952	0.285006	0.739572
MA0899.1_HOXA10	Tfh	-0.00590618	0.000899362	-0.00703793	-0.0122682	0.00163041	-0.000562742	-0.00402608	-0.0183152	0.00634071	0.291482	0.746923
MA0525.2_TP63	Tfh	-0.00380087	-0.0144702	-0.00523406	-0.0128714	-0.0198372	-0.00373616	0.0109963	-0.0170027	-0.00174224	0.304448	0.76112
MA0597.1_THAP1	Tfh	0.00740306	0.0118438	0.00299925	0.0119956	0.00994224	0.0156469	-0.00155685	-0.00117448	0.0124874	0.304448	0.76112
MA0841.1_NFE2	Tfh	0.0669906	0.0856772	0.0388428	0.0872223	0.0965685	0.0638946	0.0535683	0.0405479	0.0246753	0.320787	0.765644
MA0073.1_RREB1	Tfh	0.00563177	0.010693	0.0044369	0.00834884	0.0104271	0.0112248	0.00222846	0.00217337	0.0093726	0.322333	0.765644
MA0106.3_TP53	Tfh	-0.0146404	-0.00882871	0.000466373	-0.00474756	-0.0109623	-0.00456147	0.00521872	-0.00596514	0.00566861	0.322415	0.765644
MA0715.1_PROP1	Tfh	-0.00499384	-0.00737992	0.00803278	-0.0130738	-0.0132383	0.00433687	0.0158247	7.16018e-05	0.0129449	0.323373	0.765644
MA0668.1_NEUROD2	Tfh	0.0225048	-0.00787298	0.00374452	0.0083095	-0.00974969	-0.00411955	0.00656069	-0.00926915	0.0197107	0.324932	0.765644
MA0641.1_ELF4	Tfh	-0.00734839	-0.00981355	0.00309706	-0.00921571	-0.0143944	-0.000651937	0.00611918	0.00891146	-0.00746079	0.340074	0.788087
MA0793.1_POU6F2	Tfh	0.0122432	0.0067794	2.53294e-05	0.0204828	0.0053908	0.0095566	0.00442412	-0.00137216	-0.00153722	0.342145	0.788087
MA0504.1_NR2C2	Tfh	0.00437937	0.00811432	0.00652898	0.00101716	0.00650686	0.0113292	0.00872289	0.00799978	0.00271474	0.355219	0.792968
MA0775.1_MEIS3	Tfh	-0.00368142	-0.00168519	-0.0109564	-0.0233304	-0.0031838	0.00131202	-0.00676733	-0.0115968	-0.0134111	0.355441	0.792968
MA0472.2_EGR2	Tfh	-0.00151751	-0.00662905	-0.0048365	0.00920969	-0.00623913	-0.00740888	-0.00128448	-0.00833067	-0.00278627	0.356973	0.792968
MA0139.1_CTCF	Tfh	-0.0166048	-0.0237927	-0.00224144	-0.0337232	-0.0296095	-0.012159	-0.00364042	-0.00957132	0.00913956	0.368724	0.792968
MA0846.1_FOXC2	Tfh	0.00297308	-0.00442534	-0.00352744	-0.00150161	-0.00475712	-0.00376176	0.00515781	-0.0117919	0.00109456	0.372507	0.792968
MA0140.2_GATA1::TAL1	Tfh	0.0300289	0.0196896	0.012272	0.0365513	0.021816	0.0154367	0.000594605	0.00792536	0.0276991	0.373004	0.792968
MA0660.1_MEF2B	Tfh	-0.00349352	0.0130855	0.00463439	0.00826894	0.012693	0.0138704	0.0132999	0.00387095	-0.00122917	0.374744	0.792968
MA0479.1_FOXH1	Tfh	-0.0025424	-0.005297	0.0071297	-0.00463442	-0.0115346	0.00717827	0.00554575	0.00125925	0.0166155	0.379228	0.792968
MA0476.1_FOS	Tfh	0.0648115	0.0859405	0.0394992	0.0780824	0.0957329	0.0663558	0.0615244	0.0475543	0.010602	0.380766	0.792968
MA0796.1_TGIF1	Tfh	-0.00114823	0.00262317	-0.0106727	0.0114591	0.00187774	0.00411404	-0.00900039	-0.012742	-0.00911337	0.386454	0.792968
MA0498.2_MEIS1	Tfh	-0.00491902	0.000352515	-0.000841459	-0.0273856	0.00140168	-0.00174582	-0.00377528	0.00069093	-0.000639747	0.389044	0.792968
MA0478.1_FOSL2	Tfh	0.0599927	0.0932371	0.043686	0.0832938	0.108215	0.0632818	0.0671155	0.0447193	0.0234958	0.390682	0.792968
MA0091.1_TAL1::TCF3	Tfh	-0.00164633	-0.00115567	0.0108581	-0.0177603	-0.00504674	0.00662647	0.0079043	0.0127889	0.0105181	0.395616	0.795111
MA0486.2_HSF1	Tfh	-0.01106	-0.00486891	-0.00446955	-0.0165504	-0.00593687	-0.00273301	0.00337743	-0.00640704	-0.00803465	0.406001	0.8011
MA0637.1_CENPB	Tfh	-0.0114927	-0.00897601	0.00410963	-0.022256	-0.00876595	-0.00939614	-0.00718188	0.0113707	0.0029774	0.406412	0.8011
MA0695.1_ZBTB7C	Tfh	0.00232483	-0.0051386	0.00511478	0.0167011	-0.0123856	0.00935539	-0.00675027	0.0153984	0.000209799	0.41522	0.805095
MA0778.1_NFKB2	Tfh	0.0194863	0.0364955	0.0167595	0.0421625	0.0414805	0.0265253	0.020982	0.0313692	-0.00707219	0.416293	0.805095
MA0464.2_BHLHE40	Tfh	-0.000500962	0.00642235	-0.00274159	-0.0347095	0.00227412	0.0147188	0.00575009	-0.00380224	-0.00805003	0.42632	0.816091
MA0259.1_ARNT::HIF1A	Tfh	-0.0114302	-0.00846852	-0.00672344	-0.0114429	-0.00673069	-0.0119442	-0.00598892	-0.00119938	-0.0150447	0.435104	0.816091
MA0645.1_ETV6	Tfh	0.00175971	0.00232174	0.00821955	-0.00339908	-0.000524972	0.00801517	0.0138521	0.010847	3.5008e-05	0.435633	0.816091
MA0698.1_ZBTB18	Tfh	0.00346785	0.0103449	6.68293e-05	-0.0090054	0.0138666	0.00330155	0.00891605	5.35059e-05	-0.00699389	0.437902	0.816091
MA0028.2_ELK1	Tfh	-0.00873647	0.00098111	0.00533611	-0.013614	-0.00161077	0.00616486	0.00880478	0.0107809	-0.00506149	0.447423	0.82009
MA0051.1_IRF2	Tfh	-0.00514337	0.0105582	0.00123271	-0.0178598	0.0201294	-0.00858405	-0.00071604	0.00953395	-0.00883001	0.457382	0.82009
MA0634.1_ALX3	Tfh	-0.0008267	0.00948487	0.0115147	-0.00722391	0.00752559	0.0134034	0.019431	-0.00117937	0.0229534	0.46481	0.82009
MA0822.1_HES7	Tfh	-0.00869255	0.00153022	0.00784954	-0.00488807	-0.0045274	0.0136455	0.000883758	0.0187982	-0.00190598	0.469792	0.82009
MA0759.1_ELK3	Tfh	-0.00824988	-0.00104367	0.00570171	-0.0129304	-0.00576549	0.00839998	0.0101783	0.00876329	-0.00216574	0.473356	0.82009
MA0784.1_POU1F1	Tfh	-0.00211847	0.0069975	-0.00269166	-0.00409102	0.00926586	0.00246078	0.00704787	-0.00998188	-0.000276981	0.477566	0.82009
MA0107.1_RELA	Tfh	0.0267172	0.0279447	0.0155605	0.0500397	0.0376446	0.00854501	0.012287	0.0343745	-0.00816041	0.479504	0.82009
MA0733.1_EGR4	Tfh	-0.00117864	-0.00266809	0.0032901	0.00490567	-0.0016739	-0.00465647	-0.00272626	0.00104989	0.0112395	0.486117	0.82009
MA0138.2_REST	Tfh	-0.00182439	0.00212366	-0.00170534	0.00179968	0.0017503	0.00287038	0.0129043	-0.00114125	-0.0141828	0.486938	0.82009
MA0689.1_TBX20	Tfh	-0.0118722	0.00239735	-0.0136856	0.00833971	0.00741048	-0.00762892	0.00236019	-0.0311897	-0.00201667	0.486963	0.82009
MA0865.1_E2F8	Tfh	-0.0015055	0.00157832	-0.00786676	-0.0122876	-0.00137929	0.00749355	-0.00404396	-0.0225892	0.00968648	0.490524	0.82009
MA0636.1_BHLHE41	Tfh	0.00289974	0.00237641	-0.00221577	-0.0421722	-0.000716425	0.00856208	0.00681972	-0.00426215	-0.00657923	0.496686	0.82009
MA0510.2_RFX5	Tfh	0.00483467	0.0138106	0.0110322	0.0131644	0.0172588	0.00691409	0.0216783	0.00964497	0.00445747	0.508084	0.82009
MA0651.1_HOXC11	Tfh	-0.0229227	-0.0151055	-0.00479098	-0.0292797	-0.01828	-0.00875649	-0.00640502	0.00367894	-0.0153576	0.50901	0.82009
MA0655.1_JDP2	Tfh	0.0772889	0.0906482	0.0480766	0.0868938	0.0987292	0.074486	0.0719511	0.0464668	0.0312306	0.513253	0.82009
MA0794.1_PROX1	Tfh	-0.0073082	-0.00996246	0.00373523	-0.000654457	-0.0114548	-0.00697775	-0.00165689	0.010185	-0.000980688	0.513772	0.82009
MA0630.1_SHOX	Tfh	-0.00392	-0.00315866	0.00719554	0.0048947	-0.0099038	0.0103316	0.0162636	-0.000774942	0.0110998	0.514423	0.82009
MA0717.1_RAX2	Tfh	-0.00392	-0.00315866	0.00719554	0.0048947	-0.0099038	0.0103316	0.0162636	-0.000774942	0.0110998	0.514423	0.82009
MA0159.1_RARA::RXRA	Tfh	0.00860336	0.0114973	0.0065248	0.0129663	0.00772002	0.0190519	0.00620814	0.00768408	0.00515514	0.516057	0.82009
MA0513.1_SMAD2::SMAD3::SMAD4	Tfh	-0.0019328	0.00289345	-0.00309481	0.0028594	0.00326185	0.00215666	0.00361828	-0.00759017	-0.00217176	0.521447	0.822282
MA0762.1_ETV2	Tfh	7.4396e-05	-0.00671328	-0.00267198	-0.00337701	-0.0105254	0.0009109	0.0046825	-0.00357778	-0.00728743	0.533513	0.833057
MA0599.1_KLF5	Tfh	0.00385766	0.00257551	0.00431243	0.00647778	0.0036796	0.000367329	0.001326	0.00481081	0.00600384	0.541757	0.833057
MA0113.3_NR3C1	Tfh	-0.0201445	-0.0154004	-0.0135951	-0.00849343	-0.0148605	-0.0164802	-0.00812744	-0.0176694	-0.0122651	0.544505	0.833057
MA0497.1_MEF2C	Tfh	-0.00387707	-0.00094143	0.00228931	0.000295025	0.000283762	-0.00339182	0.00385858	0.00780736	-0.00669137	0.547785	0.833057
MA0752.1_ZNF410	Tfh	0.0123005	0.00204289	-0.000377851	-0.00846727	-0.000266377	0.00666143	0.00849079	-0.00815562	0.00341611	0.548599	0.833057
MA0258.2_ESR2	Tfh	0.0108944	0.0125876	0.0163222	0.0135551	0.0100408	0.0176812	0.0238381	0.0148621	0.0123537	0.566419	0.845504
MA0786.1_POU3F1	Tfh	0.0108817	0.00319482	0.00423219	-0.00174634	0.00284907	0.0038863	0.0106507	-0.00152135	0.00715233	0.566763	0.845504
MA0785.1_POU2F1	Tfh	-0.000683469	0.00547138	0.00253301	-0.00947779	0.000540709	0.0153327	0.0140147	-0.00117179	-0.0014656	0.573931	0.845504
MA0131.2_HINFP	Tfh	-0.0053626	-0.00330388	-0.000802354	-0.016362	-0.00438875	-0.00113415	0.00776161	-0.00419635	-0.00290194	0.57428	0.845504
MA0527.1_ZBTB33	Tfh	-0.00475294	-0.00927384	-0.00782952	-0.0102592	-0.011368	-0.00508555	-0.000459363	-0.012378	-0.00735779	0.577417	0.845504
MA0160.1_NR4A2	Tfh	0.0164157	0.0260032	0.014839	0.00245753	0.0209948	0.03602	0.0127244	0.0163005	0.0144848	0.583537	0.848405
MA0887.1_EVX1	Tfh	0.0241852	0.0151279	0.0012652	0.0208437	0.0199726	0.00543848	-0.00808977	0.01375	-0.00872958	0.592464	0.855318
MA0823.1_HEY1	Tfh	-0.00385447	0.00677441	0.00348927	-0.0066535	0.00558518	0.00915288	-0.0122164	0.0134006	0.00217791	0.603723	0.865478
MA0506.1_NRF1	Tfh	-0.00751393	-0.00768484	-0.00384418	-0.0146291	-0.0120554	0.0010563	-0.00255008	-0.00241527	-0.00687995	0.612742	0.870642
MA0638.1_CREB3	Tfh	0.00197518	-0.00220177	0.00331558	0.00155142	-0.00200703	-0.00259125	-0.00129987	0.00489598	0.00479539	0.61582	0.870642
MA0894.1_HESX1	Tfh	0.000533553	0.00986213	0.00202887	0.00399344	0.00601731	0.0175518	0.00869682	0.00592834	-0.00876477	0.622116	0.871256
MA0788.1_POU3F3	Tfh	0.00593404	0.000794647	0.000605852	-0.007634	-0.000859571	0.00410308	0.00682175	-0.00706236	0.00636863	0.628286	0.871256
MA0670.1_NFIA	Tfh	0.00356754	-0.00286165	-0.0047495	0.00477545	-0.012791	0.0169971	-0.0124968	-0.0191633	0.0216277	0.632241	0.871256
MA0648.1_GSC	Tfh	0.00481903	-0.00785761	0.00635352	-0.00534726	-0.00634752	-0.0108778	-0.012807	0.00847351	0.0187139	0.633255	0.871256
MA0098.3_ETS1	Tfh	-0.00196802	-0.0018465	0.00660584	-0.00823577	-0.00421026	0.00288103	0.0146795	0.00822496	-0.00211987	0.648924	0.877204
MA0071.1_RORA	Tfh	0.0472918	0.039906	0.0503989	0.0709843	0.0203754	0.0789671	0.0570251	0.0432107	0.0551614	0.649099	0.877204
MA0501.1_MAF::NFE2	Tfh	0.0361976	0.0424439	0.0335736	0.0371752	0.0403661	0.0465995	0.0339377	0.0317344	0.0358571	0.650415	0.877204
MA0137.3_STAT1	Tfh	0.0119916	0.014271	0.0152876	0.0129269	0.0126142	0.0175847	0.00521299	0.0154996	0.0230506	0.673051	0.9018
MA0771.1_HSF4	Tfh	-0.00640842	0.000774295	-0.00496688	-0.0135142	-0.000104677	0.00253224	-0.00368334	-0.00852283	-0.0010154	0.698204	0.929427
MA0758.1_E2F7	Tfh	-0.00247131	-0.00372086	-0.00173242	-0.015891	-0.00336288	-0.00443681	0.00244744	-0.0190906	0.0192252	0.712301	0.942076
MA0760.1_ERF	Tfh	0.000790836	-0.00204975	0.00354533	-0.00618913	-0.00601319	0.00587713	0.0179804	0.00113901	-0.00463388	0.725544	0.953439
MA0738.1_HIC2	Tfh	0.00858424	0.00396096	0.006342	0.0099613	0.00586304	0.000156799	0.00627178	0.00953096	0.00193364	0.757052	0.977599
MA0741.1_KLF16	Tfh	0.00169168	0.00052373	0.001858	0.00581906	0.00212112	-0.00267106	-0.00134844	0.00245504	0.00358731	0.766342	0.977599
MA0661.1_MEOX1	Tfh	-0.00186194	-0.0127416	-0.0161628	-0.00758872	-0.00566034	-0.0269041	0.00999773	-0.0338492	-0.0123304	0.769723	0.977599
MA0593.1_FOXP2	Tfh	-0.00715547	-0.00661498	0.000206075	-0.00519765	-0.0120709	0.00429695	-0.00235495	3.08257e-05	0.00250024	0.774922	0.977599
MA0050.2_IRF1	Tfh	-0.000367707	0.00249015	0.00327624	-0.00611525	0.00417008	-0.000869711	0.00470856	0.00629901	-0.00210149	0.775981	0.977599
MA0839.1_CREB3L1	Tfh	0.00137388	0.00501646	0.00577004	0.00756927	0.0131822	-0.0113151	0.00361256	0.0109883	0.000190446	0.776296	0.977599
MA0076.2_ELK4	Tfh	-0.00192191	0.00161048	0.00269452	-0.00341425	-0.00228799	0.00940744	0.00597568	0.00453664	-0.00250938	0.781182	0.977599
MA0732.1_EGR3	Tfh	-0.00415383	-0.00293457	-0.00193772	0.00698436	-8.59344e-05	-0.00863183	-0.000695821	-0.00601817	0.00278139	0.782079	0.977599
MA0797.1_TGIF2	Tfh	-0.00196258	-0.00516545	-0.00783308	0.00943382	-0.0123069	0.00911737	-0.00883277	-0.00598028	-0.00962725	0.799568	0.978852
MA0646.1_GCM1	Tfh	0.00406163	0.000979015	0.00347275	0.00973326	0.00339363	-0.00385021	-0.00011064	-0.00315889	0.0156237	0.799783	0.978852
MA0699.1_LBX2	Tfh	0.00474011	0.001344	0.00694842	-0.000778345	-0.00766342	0.0193588	0.0216881	-0.0061615	0.0135106	0.799783	0.978852
MA0475.2_FLI1	Tfh	-0.00206006	-0.00167267	0.00596604	-0.00651044	-0.00294384	0.00086966	0.0146374	0.0065636	-0.00180759	0.802608	0.978852
MA0737.1_GLIS3	Tfh	0.00493781	0.00338913	-0.00125762	-0.00595271	0.00372554	0.00271632	-0.00454563	-0.00877695	0.0118999	0.823232	0.978852
MA0711.1_OTX1	Tfh	0.0087978	0.00910463	0.001006	-0.0253313	0.00255918	0.0221955	0.00803652	0.00826714	-0.014784	0.824719	0.978852
MA0639.1_DBP	Tfh	-0.0153631	-0.00417249	-0.00735905	-0.0382124	-0.0101535	0.00778951	-0.0304731	0.014241	-0.0191078	0.827283	0.978852
MA0804.1_TBX19	Tfh	-0.00390308	0.00606321	-0.00151377	-0.0218376	0.00968445	-0.00117927	-0.0150896	0.00796902	-0.00392905	0.829463	0.978852
MA0844.1_XBP1	Tfh	0.00804478	0.00849199	0.00671101	0.0246881	0.00879031	0.00789534	-0.00229852	0.0181747	-0.0021305	0.829463	0.978852
MA0664.1_MLXIPL	Tfh	0.00122656	-0.00181804	0.00244012	-0.0176941	-0.00842284	0.0113915	0.00413764	0.00206562	0.00160641	0.837336	0.978852
MA0115.1_NR1H2::RXRA	Tfh	-0.00384092	-0.000537533	-0.000523372	-0.0317678	0.00149977	-0.00461214	0.0105226	-0.00489175	-0.00324442	0.843005	0.978852
MA0749.1_ZBED1	Tfh	-0.00552965	-0.00640441	-0.00426568	-0.0305539	-0.0213571	0.0235009	0.010595	-0.00575745	-0.0140658	0.844998	0.978852
MA0647.1_GRHL1	Tfh	-0.00670831	-0.0044623	0.0116939	-0.00260261	-0.0118204	0.010254	-0.00745621	0.0342687	-0.00459056	0.849643	0.978852
MA0466.2_CEBPB	Tfh	0.0149914	0.00877599	0.0164139	0.00929791	0.00480148	0.016725	0.0015086	0.0346236	0.00284457	0.84993	0.978852
MA0665.1_MSC	Tfh	-0.00298614	-0.00329327	-0.00793261	-0.00729004	-0.00874648	0.00761314	-0.00645304	-0.011151	-0.00461047	0.85862	0.981106
MA0837.1_CEBPE	Tfh	0.0186636	0.011874	0.0182375	0.00284621	0.00558739	0.0244473	0.0039818	0.0387385	0.00094077	0.864725	0.981106
MA0686.1_SPDEF	Tfh	0.00117567	-0.00520838	3.37633e-05	-0.0148435	-0.0145458	0.0134664	0.00701006	-0.00299084	-0.00131282	0.879436	0.981106
MA0662.1_MIXL1	Tfh	0.00167576	0.000180161	0.00137586	-0.0120577	-0.000492972	0.00152643	0.0172537	-0.00951951	0.00392712	0.890723	0.981106
MA0031.1_FOXD1	Tfh	-0.00850487	-0.00205762	-0.0022587	-0.00983357	-0.00796794	0.00976304	-0.00408391	-0.000653384	-0.00304597	0.894095	0.981106
MA0157.2_FOXO3	Tfh	-0.00850487	-0.00205762	-0.0022587	-0.00983357	-0.00796794	0.00976304	-0.00408391	-0.000653384	-0.00304597	0.894095	0.981106
MA0724.1_VENTX	Tfh	0.000268076	-0.000869741	0.0038913	0.00489553	0.00883627	-0.0202818	0.0125584	0.00098207	0.00103053	0.90412	0.981106
MA0046.2_HNF1A	Tfh	0.000861147	-0.00369154	0.00359791	-0.0180797	-0.0119332	0.0127918	0.0281621	-0.00942688	0.00218124	0.904486	0.981106
MA0024.3_E2F1	Tfh	-0.00674246	-0.00564548	-0.00363748	-0.00735968	-0.00808279	-0.000770867	0.00591433	-0.0161602	0.00625293	0.906319	0.981106
MA0027.2_EN1	Tfh	0.00890161	0.0161439	0.0100676	0.0064212	0.0224238	0.00358405	0.0222371	0.0153097	-0.00700681	0.910226	0.981106
MA0649.1_HEY2	Tfh	0.00714418	0.00761009	0.00572808	-0.00954296	0.00340194	0.0160264	0.00406129	0.00585561	0.00688296	0.911148	0.981106
MA0153.2_HNF1B	Tfh	0.00506177	0.00267633	0.0058251	-0.021415	-0.00823239	0.0244938	0.0281188	-0.00567339	0.004088	0.912332	0.981106
MA0845.1_FOXB1	Tfh	-0.00390566	-0.00329178	-0.00420664	-0.0028623	-0.00345933	-0.00295667	-0.00812936	-0.00726896	0.00321879	0.914104	0.981106
MA0763.1_ETV3	Tfh	-0.00286381	-0.000998868	0.00298396	-0.00968962	-0.00489119	0.00678578	0.0102375	0.0078101	-0.00957544	0.925274	0.987923
MA0770.1_HSF2	Tfh	-0.000926402	-0.000415602	-0.00263257	-0.0179959	0.000948129	-0.00314307	0.00580732	-0.00379375	-0.00775881	0.951053	0.990748
MA0694.1_ZBTB7B	Tfh	0.00307447	0.00250927	0.00205475	0.0182604	0.0060261	-0.00452438	-0.00865491	0.00726474	0.0033285	0.952643	0.990748
MA0826.1_OLIG1	Tfh	-0.00386387	-0.0025707	-0.0109566	-0.00305889	-0.00323002	-0.00125205	0.00472521	-0.0248891	-0.00399653	0.953302	0.990748
MA0808.1_TEAD3	Tfh	-0.0061299	-0.00495033	-0.00451101	-0.00322702	-0.00621586	-0.00241929	0.000723406	-0.00396843	-0.00945815	0.955733	0.990748
MA0787.1_POU3F2	Tfh	0.00108813	0.00162104	-0.000551126	-0.00516132	0.00316458	-0.00146605	-2.94754e-05	-0.0087731	0.0105423	0.963503	0.990748
MA0914.1_ISL2	Tfh	0.00166905	0.0041312	-0.00540066	-0.0151214	0.00374623	0.00490113	0.0153624	-0.019791	-0.00186461	0.964284	0.990748
MA0861.1_TP73	Tfh	-0.0101389	-0.0150987	-0.0174182	-0.00801474	-0.0205761	-0.00414399	0.00099197	-0.0237379	-0.0232987	0.985348	0.990748
MA0042.2_FOXI1	Tfh	-0.00128327	-0.000696336	0.000849066	0.00137261	-0.00532719	0.00856538	-0.000141721	0.00384783	-0.00255657	0.988194	0.990748
MA0848.1_FOXO4	Tfh	-0.00128327	-0.000696336	0.000849066	0.00137261	-0.00532719	0.00856538	-0.000141721	0.00384783	-0.00255657	0.988194	0.990748
MA0849.1_FOXO6	Tfh	-0.00128327	-0.000696336	0.000849066	0.00137261	-0.00532719	0.00856538	-0.000141721	0.00384783	-0.00255657	0.988194	0.990748
MA0850.1_FOXP3	Tfh	-0.00128327	-0.000696336	0.000849066	0.00137261	-0.00532719	0.00856538	-0.000141721	0.00384783	-0.00255657	0.988194	0.990748
MA0070.1_PBX1	Tfh	-0.00548547	-0.00619171	-0.00696208	-0.00489024	0.000596275	-0.0197677	-0.00914823	-0.00506474	-0.00786945	0.989529	0.990748
MA0687.1_SPIC	Tfh	0.00227107	0.00147603	0.00157408	-0.00599143	0.000845088	0.00273792	0.00974423	0.0043128	-0.00879625	0.990748	0.990748
MA0801.1_MGA	CD56bright NK	0.0119776	0.0236029	-0.0330431	0.0213782	0.026395	0.0180186	-0.0340945	-0.0287263	-0.0373785	1.62132e-05	0.00215566	0.339021	0.000400461	4.20406e-05	0.339021	0.000600691	0.000126122
MA0800.1_EOMES	CD56bright NK	0.0134926	0.015086	-0.0392084	0.0218475	0.0178969	0.00946419	-0.0273779	-0.0340523	-0.0531109	3.47354e-05	0.00215566	0.973699	0.000400461	8.8974e-05	0.973699	0.000600691	0.000266922
MA0690.1_TBX21	CD56bright NK	0.0138274	0.0172671	-0.0361911	0.0201348	0.0199572	0.0118869	-0.0277408	-0.0306472	-0.0482926	3.91938e-05	0.00215566	0.973699	0.000483798	8.8974e-05	0.973699	0.000725697	0.000266922
MA0805.1_TBX1	CD56bright NK	0.0176736	0.0162734	-0.0342448	0.0226358	0.0155457	0.0177287	-0.0295133	-0.0269164	-0.0459489	6.04249e-05	0.00249253	0.620928	0.000272427	0.000307521	0.620928	0.000461282	0.000461282
MA0790.1_POU4F1	CD56bright NK	-0.00472993	-0.0131964	0.014928	-0.00663622	-0.0173397	-0.00490995	0.013326	0.00854009	0.0234485	0.000223689	0.00738175	0.488718	0.00331122	0.000217783	0.488718	0.00496683	0.000653348
MA0699.1_LBX2	CD56bright NK	-0.00265602	-0.0113789	0.0142763	-0.0132059	-0.0119346	-0.0102675	0.0163321	0.00796022	0.0202746	0.000593816	0.01633	0.306762	0.0112259	0.000364412	0.306762	0.0168389	0.00109323
MA0796.1_TGIF1	CD56bright NK	0.00201669	0.0077129	-0.017933	0.00765596	0.00746786	0.00820299	-0.0155975	-0.0203819	-0.016633	0.000988721	0.0208076	0.575157	0.0148849	0.000431028	0.575157	0.0223273	0.00129308
MA0666.1_MSX1	CD56bright NK	-0.00831073	-0.011341	0.0104685	-0.00223507	-0.0117221	-0.0105788	0.0176699	0.00667071	0.0100983	0.00105067	0.0208076	0.339021	0.00838882	0.000970591	0.339021	0.0125832	0.00291177
MA0095.2_YY1	CD56bright NK	-0.00924594	-0.00925886	0.0118634	-0.0158912	-0.010372	-0.00703267	0.00984648	0.0110949	0.0141047	0.00113496	0.0208076	0.869066	0.00722664	0.000828193	0.869066	0.01084	0.00248458
MA0804.1_TBX19	CD56bright NK	0.0064273	0.0134927	-0.0200547	-0.00896714	0.015919	0.0086401	-0.0182606	-0.0213371	-0.0197546	0.00154537	0.0254986	0.766679	0.00120151	0.006464	0.766679	0.00360452	0.00969601
MA0671.1_NFIX	CD56bright NK	0.00822369	-0.00667944	-0.00921211	-0.00283774	-0.0136147	0.00719097	-0.0140942	-0.0105609	-0.00438378	0.00175658	0.0263486	0.0271799	0.000483798	0.22333	0.0407698	0.00145139	0.22333
MA0797.1_TGIF2	CD56bright NK	0.00265725	0.00762449	-0.0154281	0.00735704	0.00916245	0.00454858	-0.0112767	-0.0127955	-0.021267	0.00225997	0.0309877	0.716859	0.00532584	0.003233	0.716859	0.00798876	0.00798876
MA0685.1_SP4	CD56bright NK	-0.00274755	-0.00244803	0.00703458	-0.00429407	-0.00222135	-0.00290138	0.00776095	0.00253637	0.0117983	0.00254464	0.0309877	0.973699	0.00722664	0.00279938	0.973699	0.01084	0.00839813
MA0513.1_SMAD2::SMAD3::SMAD4	CD56bright NK	0.0044664	0.0140703	-0.0264822	0.0196165	0.0142633	0.0136844	-0.0288305	-0.0206138	-0.0317631	0.00280913	0.0309877	0.973699	0.00388867	0.005648	0.973699	0.008472	0.008472
MA0506.1_NRF1	CD56bright NK	-0.00758014	-0.00415963	0.00779049	-0.0149538	-0.00630697	0.000135051	0.00881664	0.0106642	0.00375372	0.00281707	0.0309877	0.869066	0.00971542	0.0024195	0.869066	0.0145731	0.00725851
MA0596.1_SREBF2	CD56bright NK	0.00261253	0.00705664	-0.0130235	0.00257101	0.00435606	0.0124578	-0.0198554	-0.00797281	-0.0143614	0.00301062	0.031047	0.531045	0.00388867	0.006464	0.531045	0.00969601	0.00969601
MA0788.1_POU3F3	CD56bright NK	-0.00753613	-0.00225564	0.00733662	-0.0107475	-0.00394367	0.00112041	0.00925647	0.010205	0.00271023	0.00393685	0.0382106	0.22252	0.00120151	0.0598453	0.22252	0.00360452	0.0897679
MA0785.1_POU2F1	CD56bright NK	-0.00921266	-0.000503268	0.00637776	-0.0132847	-0.00364918	0.00578856	0.010571	0.00877229	0.000788664	0.00425186	0.0389753	0.0271799	0.00331122	0.0968083	0.0407698	0.00993366	0.0968083
MA0595.1_SREBF1	CD56bright NK	0.000555749	0.00882334	-0.0155663	0.00503192	0.0087527	0.00896462	-0.0102995	-0.0137013	-0.0212533	0.00458188	0.0397901	0.409811	0.0254614	0.00279938	0.409811	0.0381921	0.00839813
MA0637.1_CENPB	CD56bright NK	-0.0125803	0.00232099	0.0049656	-0.0173152	-0.00376204	0.0144871	0.00168957	0.00396031	0.00832245	0.0056472	0.0465894	0.0517542	0.000701094	0.70663	0.0776313	0.00210328	0.70663
MA0073.1_RREB1	CD56bright NK	0.000328801	0.00670617	-0.00820946	0.00576179	0.00585068	0.00841715	-0.011849	-0.00597178	-0.00839373	0.0061746	0.0485147	0.276605	0.0371874	0.003727	0.276605	0.0557812	0.011181
MA0717.1_RAX2	CD56bright NK	-0.00631243	-0.0114789	0.0106519	-0.0041329	-0.0125127	-0.00941133	0.0123515	0.00551897	0.0155072	0.00679221	0.0509415	0.575157	0.0112259	0.00842106	0.575157	0.0168389	0.0168389
MA0527.1_ZBTB33	CD56bright NK	-0.00306542	-0.00516574	0.00597077	-0.0122921	-0.0087273	0.00195738	0.00874921	0.00576168	0.00436241	0.00832626	0.0584671	0.448279	0.0925644	0.00208737	0.448279	0.138847	0.0062621
MA0660.1_MEF2B	CD56bright NK	-0.00880906	0.00399321	0.00455831	-0.0119672	0.00437643	0.00322677	0.00620786	0.00299186	0.00528613	0.0085043	0.0584671	0.00334362	0.0112259	0.807584	0.0100309	0.0168389	0.807584
MA0058.3_MAX	CD56bright NK	-0.00865029	0.00503922	0.0027279	-0.00826559	0.0041206	0.00687645	0.00422681	0.00723228	-0.00352649	0.00987776	0.0626707	0.00757404	0.0112259	0.438391	0.0168389	0.0168389	0.438391
MA0822.1_HES7	CD56bright NK	-0.0100004	0.00417584	-0.00476746	-0.0124954	0.000380425	0.0117667	-0.00496939	0.00584632	-0.0170156	0.00994615	0.0626707	0.006211	0.0832321	0.0598453	0.018633	0.0832321	0.0832321
MA0825.1_MNT	CD56bright NK	-0.013217	-0.00060863	0.00532369	-0.0164961	-0.00264131	0.00345672	0.00516758	0.0102452	-0.000314012	0.0102552	0.0626707	0.0926813	0.00201581	0.341079	0.139022	0.00604743	0.341079
MA0786.1_POU3F1	CD56bright NK	-0.00881645	-0.00253005	0.00751528	-0.0142939	-0.00322306	-0.00114403	0.0106661	0.00515552	0.00816776	0.0126026	0.0724895	0.156288	0.00388867	0.150115	0.156288	0.011666	0.156288
MA0163.1_PLAG1	CD56bright NK	-0.00229179	0.00662526	-0.00335258	-0.00285405	0.00848655	0.0029027	-0.000884463	-0.00174803	-0.00686997	0.0127406	0.0724895	0.0443138	0.706491	0.00428869	0.0664707	0.706491	0.0128661
MA0144.2_STAT3	CD56bright NK	-0.00152291	-0.00224684	0.00739009	-0.00359335	-0.00347191	0.00020331	0.00182121	0.0123468	0.00531981	0.0153717	0.0845444	0.620928	0.0328502	0.0108921	0.620928	0.0492752	0.0326762
MA0160.1_NR4A2	CD56bright NK	0.00176448	0.0093477	-0.00461488	0.00182762	0.00609166	0.0158598	-0.0125757	-0.00158191	-0.00284613	0.0161759	0.0860974	0.306762	0.0832321	0.00738457	0.306762	0.124848	0.0221537
MA0634.1_ALX3	CD56bright NK	-0.00630812	-0.0060656	0.0103622	-0.00481547	-0.00436843	-0.00945994	0.00831466	0.0059911	0.0168268	0.0167076	0.0861484	0.921212	0.0195566	0.0178353	0.921212	0.0293348	0.0293348
MA0597.1_THAP1	CD56bright NK	0.00391161	0.00469524	-0.00896145	0.0104563	0.00127528	0.0115352	-0.00851442	-0.00470561	-0.0142246	0.0177446	0.088723	0.817483	0.0289535	0.0139876	0.817483	0.0434302	0.0419628
MA0707.1_MNX1	CD56bright NK	-0.00727745	-0.0104479	0.00785027	-0.00607243	-0.0125772	-0.00618919	0.0149695	0.00450001	0.00701274	0.019638	0.0953023	0.817483	0.0597191	0.00842106	0.817483	0.0895787	0.0252632
MA0046.2_HNF1A	CD56bright NK	-0.00739574	-0.00302816	0.00843615	-0.0120211	-0.00423819	-0.0006081	0.00574324	0.00293306	0.0166517	0.0203109	0.0957513	0.488718	0.00971542	0.0598453	0.488718	0.0291463	0.0897679
MA0152.1_NFATC2	CD56bright NK	-0.00155686	-0.00659989	0.00613678	-0.00848685	-0.00771382	-0.00437203	0.00670013	0.011788	-0.000831911	0.0216909	0.0982541	0.248535	0.167351	0.00738457	0.248535	0.248535	0.0221537
MA0112.3_ESR1	CD56bright NK	-0.00192251	0.0109132	-0.00303654	0.000423949	0.0109442	0.0108514	-0.000806645	-0.000350682	-0.00765664	0.0220327	0.0982541	0.0443138	0.706491	0.00958579	0.0664707	0.706491	0.0287574
MA0139.1_CTCF	CD56bright NK	-0.011109	-0.0171113	0.0235309	-0.0218789	-0.0182437	-0.0148465	0.014772	0.0187986	0.0348913	0.0244429	0.106134	0.921212	0.042003	0.0158088	0.921212	0.0630045	0.0474263
MA0051.1_IRF2	CD56bright NK	-0.00246796	0.011236	0.011452	-0.0185876	0.0165809	0.000546334	0.0111453	0.0140941	0.00857394	0.0259993	0.109731	0.0160957	0.0195566	0.947043	0.0293348	0.0293348	0.947043
MA0698.1_ZBTB18	CD56bright NK	0.00156363	0.00187074	-0.013188	0.00767564	-0.00110843	0.00782907	-0.0176967	-0.00953904	-0.0144393	0.0266014	0.109731	0.620928	0.0170811	0.039489	0.620928	0.0512432	0.0592335
MA0649.1_HEY2	CD56bright NK	-0.00844132	0.00474858	-0.00108576	-0.0064963	0.00342288	0.00739997	-0.00553264	0.0073509	-0.00796395	0.0275449	0.110851	0.00919942	0.152437	0.137967	0.0275983	0.152437	0.152437
MA0504.1_NR2C2	CD56bright NK	0.000999712	0.00588458	-0.00287173	0.00156167	0.00598149	0.00569078	-0.00414511	-6.10069e-05	-0.005302	0.0303232	0.115203	0.248535	0.11374	0.0158088	0.248535	0.17061	0.0474263
MA0657.1_KLF13	CD56bright NK	-0.00388156	-0.00124697	0.0080732	-0.00698173	-0.000735429	-0.00227007	0.0104572	0.000922106	0.0148268	0.0303895	0.115203	0.531045	0.0195566	0.0540779	0.531045	0.0586697	0.0811168
MA0855.1_RXRB	CD56bright NK	-0.00411372	0.00698146	-0.000747383	-0.00108948	0.00878842	0.00336753	-0.000984794	0.000874294	-0.00248107	0.0307208	0.115203	0.0271799	0.258595	0.039489	0.0592335	0.258595	0.0592335
MA0773.1_MEF2D	CD56bright NK	-0.00813359	-0.00181206	0.00445536	-0.014647	-0.00462943	0.00382269	0.00931738	0.000868611	0.00539856	0.0346764	0.12189	0.198516	0.0148849	0.163063	0.198516	0.0446547	0.198516
MA0792.1_POU5F1B	CD56bright NK	-0.00910312	-0.00288131	0.00450111	-0.011003	-0.00642368	0.00420344	0.00827998	0.0038241	0.00277171	0.0346764	0.12189	0.373378	0.00621106	0.258831	0.373378	0.0186332	0.373378
MA0894.1_HESX1	CD56bright NK	-0.00953771	-0.00521242	0.00567977	-0.00585539	-0.0056075	-0.00442226	0.016994	-0.00204188	0.00714552	0.0347202	0.12189	0.488718	0.0170811	0.0802756	0.488718	0.0512432	0.120413
MA0694.1_ZBTB7B	CD56bright NK	-0.00727854	0.00422595	-0.00760314	-0.000548231	0.00465877	0.0033603	-0.0032896	-0.00152848	-0.0175659	0.0367108	0.126194	0.0271799	0.821245	0.028387	0.0425804	0.821245	0.0425804
MA0759.1_ELK3	CD56bright NK	-0.00308802	-0.00370445	0.00666404	-0.02104	-0.00677939	0.00244543	0.00761091	0.0100868	0.00203951	0.0387264	0.128019	0.921212	0.042003	0.0317443	0.921212	0.0630045	0.0630045
MA0691.1_TFAP4	CD56bright NK	0.0034216	0.00258262	-0.00949365	0.0115013	-0.000845323	0.00943852	-0.00166902	-0.0129671	-0.0106577	0.0387935	0.128019	1	0.0371874	0.0354365	1	0.0557812	0.0557812
MA0137.3_STAT1	CD56bright NK	1.44264e-05	-0.000853576	0.00707159	-0.0032089	-0.00282617	0.0030916	0.00812853	0.0108876	0.00191502	0.040113	0.129777	0.766679	0.0597191	0.0253401	0.766679	0.0895787	0.0760204
MA0845.1_FOXB1	CD56bright NK	-0.00387281	-0.00710614	0.0033511	0.00161851	-0.00910549	-0.00310745	-0.0015456	0.00162018	0.00863497	0.0464152	0.141451	0.488718	0.0925644	0.0253401	0.488718	0.138847	0.0760204
MA0738.1_HIC2	CD56bright NK	-0.00341689	0.00624938	-0.00541315	0.00327732	0.0071074	0.00453334	-0.00101447	-0.00486479	-0.00898534	0.0469116	0.141451	0.0443138	0.74415	0.028387	0.0664707	0.74415	0.0664707
MA0823.1_HEY1	CD56bright NK	-0.00325018	0.0051882	-0.00435992	-0.00779203	0.00478837	0.00598788	-0.00648261	0.0039558	-0.0126465	0.0474882	0.141451	0.0377971	0.782431	0.0317443	0.0566956	0.782431	0.0566956
MA0767.1_GCM2	CD56bright NK	-0.00569497	-0.00061725	-0.012772	0.00403329	-0.00277328	0.00369481	-0.0184705	-0.0186017	-0.00217157	0.0479604	0.141451	0.248535	0.0746771	0.039489	0.248535	0.112016	0.112016
MA0768.1_LEF1	CD56bright NK	0.0143863	0.00369645	-2.83433e-05	0.0202316	0.00273056	0.00562823	-0.00618103	0.00296958	0.000575867	0.0480076	0.141451	0.0602125	0.0195566	0.773481	0.0903188	0.0586697	0.773481
MA0737.1_GLIS3	CD56bright NK	-0.00223886	0.00669645	-0.00960913	0.00390064	0.00494193	0.0102055	-0.0103398	-0.00363986	-0.0160862	0.0492413	0.142541	0.276605	0.238029	0.0178353	0.276605	0.276605	0.0535059
MA0653.1_IRF9	CD56bright NK	-0.00216179	0.0111737	0.00404543	-0.0203381	0.016964	-0.000406808	0.0172578	0.0049304	-0.00579526	0.0531792	0.151286	0.0271799	0.0746771	0.341079	0.0815397	0.112016	0.341079
MA0625.1_NFATC3	CD56bright NK	-0.00682736	-0.00626409	0.00494077	-0.0140967	-0.00339952	-0.0119932	0.0080012	0.0108145	-0.00395216	0.0546366	0.152797	0.668216	0.0371874	0.0598453	0.668216	0.0897679	0.0897679
MA0507.1_POU2F2	CD56bright NK	-0.0081599	-0.000814342	0.00289511	-0.00962218	-0.000866895	-0.000709235	-0.000448187	0.00688403	0.000470241	0.0564013	0.155103	0.106206	0.0254614	0.364008	0.159309	0.0763843	0.364008
MA0665.1_MSC	CD56bright NK	0.00555813	0.00825627	-0.00577042	0.00554665	0.00878974	0.00718933	-0.00422875	-0.00386674	-0.00901917	0.0653039	0.173793	0.817483	0.0170811	0.137967	0.817483	0.0512432	0.20695
MA0048.2_NHLH1	CD56bright NK	0.00135836	0.000273082	-0.00588692	0.00355796	0.000113246	0.000592754	-0.00663516	-0.00469969	-0.0067732	0.0653039	0.173793	0.668216	0.0668543	0.0487819	0.668216	0.100282	0.100282
MA0032.2_FOXC1	CD56bright NK	-0.000177822	-0.00882477	0.00426538	-0.00022929	-0.0121491	-0.0021761	0.00784318	0.000684362	0.00605804	0.0663787	0.173849	0.137913	0.436422	0.028387	0.20687	0.436422	0.0851609
MA0523.1_TCF7L2	CD56bright NK	0.014693	0.00707746	-0.00526796	0.0271933	0.00425452	0.0127233	-0.00313445	-0.000791593	-0.0119127	0.0686578	0.177009	0.869066	0.0371874	0.0882301	0.869066	0.111562	0.132345
MA0599.1_KLF5	CD56bright NK	-0.00156036	0.00139335	0.00144249	-0.00151954	0.00179971	0.000580626	0.00240597	0.00106239	0.00124362	0.0736192	0.18489	0.0517542	0.042003	0.982336	0.0776313	0.0776313	0.982336
MA0071.1_RORA	CD56bright NK	-0.000682036	0.0027847	-0.0103855	0.000706578	0.00541883	-0.00248356	-0.00768852	-0.00738155	-0.0156882	0.074616	0.18489	0.766679	0.0832321	0.0487819	0.766679	0.124848	0.124848
MA0159.1_RARA::RXRA	CD56bright NK	0.00524946	0.00688989	-0.00567817	0.0105947	0.0122239	-0.00377807	-0.00779606	-0.00252235	-0.00794804	0.0750766	0.18489	1	0.0371874	0.0968083	1	0.111562	0.145212
MA0107.1_RELA	CD56bright NK	0.0169237	0.0142744	-0.0108046	0.0184319	0.0136992	0.0154247	-0.0199318	0.00592825	-0.0242415	0.0805786	0.193753	0.869066	0.0328502	0.126591	0.869066	0.0985505	0.189886
MA0258.2_ESR2	CD56bright NK	0.00364841	0.00669469	-0.00390126	0.00896798	0.00495313	0.0101778	-0.00748125	-0.00334036	-0.00216899	0.0810241	0.193753	0.488718	0.200423	0.0317443	0.488718	0.300635	0.0952328
MA0070.1_PBX1	CD56bright NK	-0.0069279	0.00190601	0.00457158	-0.000479511	0.00110209	0.00351387	7.97854e-05	-0.00206302	0.0153065	0.0837903	0.197506	0.0805752	0.0371874	0.876835	0.120863	0.111562	0.876835
MA0662.1_MIXL1	CD56bright NK	-0.00894001	-0.00858627	0.00479447	-0.0094552	-0.014407	0.0030552	0.0029941	-0.000634072	0.012328	0.085891	0.197828	1	0.0473361	0.0968083	1	0.142008	0.145212
MA0645.1_ETV6	CD56bright NK	0.0022679	0.000245566	-0.00583844	-0.00932973	-0.00309294	0.00692259	-0.00101571	-0.00527994	-0.00970517	0.0883938	0.197828	0.668216	0.0473361	0.115958	0.668216	0.142008	0.173938
MA0641.1_ELF4	CD56bright NK	-0.00448256	-0.00182711	0.00420933	-0.0169679	-0.00445506	0.0034288	0.00500529	0.00571855	0.00191794	0.0895917	0.197828	0.716859	0.0746771	0.0729138	0.716859	0.112016	0.112016
MA0115.1_NR1H2::RXRA	CD56bright NK	-0.00296174	0.00354226	0.00170162	0.00824194	0.00423036	0.00216606	0.0103397	-0.00377791	0.00233572	0.0898353	0.197828	0.0517542	0.167351	0.206948	0.155263	0.206948	0.206948
MA0050.2_IRF1	CD56bright NK	-0.000172881	0.00288532	0.00519696	-0.00961746	0.0040737	0.000508553	0.00810579	0.00624682	0.00203289	0.0908491	0.197828	0.198516	0.0223399	0.70663	0.297774	0.0670197	0.70663
MA0647.1_GRHL1	CD56bright NK	-0.00185857	0.00155006	0.0116691	-0.00315658	0.00306915	-0.00148812	0.0205536	0.00880925	0.00908247	0.0911208	0.197828	0.817483	0.0746771	0.0729138	0.817483	0.112016	0.112016
MA0652.1_IRF8	CD56bright NK	-0.00341532	0.0109716	0.0105303	-0.0237694	0.0167195	-0.000524228	0.0130623	0.00900795	0.0106183	0.0980833	0.210179	0.0697861	0.0532274	1	0.104679	0.104679	1
MA0776.1_MYBL1	CD56bright NK	-0.00661705	0.0118173	-0.00860466	0.00174266	0.0094734	0.0165052	-0.0199718	0.00113455	-0.012389	0.10035	0.211195
MA0024.3_E2F1	CD56bright NK	-0.00278839	-0.00464107	0.00808479	-0.0153255	-0.0072464	0.000569578	0.0200162	0.00480872	0.00395263	0.101118	0.211195
MA0903.1_HOXB3	CD56bright NK	-0.00288883	-0.0146479	-0.00281699	-0.00221559	-0.0201108	-0.00372219	0.00560697	-0.00755776	-0.00290208	0.107374	0.220035
MA0105.4_NFKB1	CD56bright NK	0.00709248	0.0152731	-0.0140208	0.0132265	0.00997182	0.0258757	-0.0288414	0.00275176	-0.0237083	0.108017	0.220035
MA0059.1_MAX::MYC	CD56bright NK	-0.00686568	0.0061298	-0.00185902	-0.00754565	0.00668202	0.00502535	0.000966733	-0.000615237	-0.00519395	0.112867	0.227111
MA0895.1_HMBOX1	CD56bright NK	-0.0107309	-0.00518829	0.00259721	-0.0136835	-0.0110444	0.00652395	0.00356133	0.00703059	-0.00321781	0.120488	0.238239
MA0843.1_TEF	CD56bright NK	-0.00891179	0.0137134	0.00260305	-0.0175423	0.0123339	0.0164724	0.0186595	0.00313854	-0.00872602	0.121286	0.238239
MA0865.1_E2F8	CD56bright NK	-0.00370474	-0.000446887	0.00770466	-0.00330803	-0.0066778	0.0120149	0.0179886	0.00557324	0.00333537	0.123964	0.240636
MA0031.1_FOXD1	CD56bright NK	0.00420566	-0.0169922	-0.000453882	0.00354508	-0.0235697	-0.00383726	0.0022421	0.00123158	-0.00421757	0.137573	0.258697
MA0157.2_FOXO3	CD56bright NK	0.00420566	-0.0169922	-0.000453882	0.00354508	-0.0235697	-0.00383726	0.0022421	0.00123158	-0.00421757	0.137573	0.258697
MA0899.1_HOXA10	CD56bright NK	-0.0098215	0.00180643	-0.00323129	-0.00389322	0.000566436	0.00428641	-0.00569292	-0.00267234	-0.00224232	0.137972	0.258697
MA0101.1_REL	CD56bright NK	0.0139685	0.0132516	-0.0100675	0.0188095	0.0113619	0.0170309	-0.0228472	0.00463319	-0.0186986	0.141193	0.261762
MA0464.2_BHLHE40	CD56bright NK	-0.00667213	0.00227519	0.00361347	-0.00738101	-0.00160739	0.0100403	0.00643459	0.0120014	-0.00805323	0.158941	0.286037
MA0028.2_ELK1	CD56bright NK	-0.00341287	-0.00220127	0.00507454	-0.0206886	-0.00411844	0.00163306	0.00589094	0.00790692	0.00122582	0.160032	0.286037
MA0735.1_GLIS1	CD56bright NK	0.00240203	0.00331021	-0.00599861	-0.00870804	-0.000263006	0.0104566	-0.0120214	0.00447089	-0.0141978	0.160449	0.286037
MA0497.1_MEF2C	CD56bright NK	-0.00594507	-0.00150612	0.00196601	-0.00635558	-0.00461263	0.00470691	0.00874058	0.00268381	-0.00338782	0.161539	0.286037
MA0778.1_NFKB2	CD56bright NK	0.0141258	0.0140605	-0.0128511	0.0206162	0.00964305	0.0228954	-0.0209958	0.00555893	-0.0288997	0.163775	0.286037
MA0670.1_NFIA	CD56bright NK	0.00720746	-0.00054135	-0.00162428	-0.00244142	-0.00326891	0.00491377	-0.000912525	-0.000663654	-0.0032195	0.164688	0.286037
MA0819.1_CLOCK	CD56bright NK	-0.0104506	0.000850147	-0.00584045	-0.00856481	-0.00219894	0.00694833	-0.004764	-0.00649163	-0.00579838	0.167152	0.287293
MA0113.3_NR3C1	CD56bright NK	-0.0171563	-0.00753054	-0.00801696	-0.0159149	-0.004283	-0.0140256	-0.0107549	-0.0115655	-0.00205169	0.175137	0.296554
MA0511.2_RUNX2	CD56bright NK	0.00185386	0.00579864	-0.0142027	0.0147066	0.000965158	0.0154656	-0.0234921	0.00226549	-0.0272227	0.177933	0.296554
MA0834.1_ATF7	CD56bright NK	-5.65288e-05	-0.00360035	0.00500523	-0.0153877	-0.00368149	-0.00343807	0.00148622	0.00658967	0.00550271	0.177933	0.296554
MA0752.1_ZNF410	CD56bright NK	0.00410047	-0.00927549	-0.00569335	-0.00266029	-0.00844705	-0.0109324	0.00546061	-0.0067484	-0.0118984	0.189252	0.310461
MA0517.1_STAT1::STAT2	CD56bright NK	-0.000312871	0.00583459	0.00473775	-0.0114107	0.00909007	-0.000676369	0.0105513	0.00555859	-9.55758e-05	0.19004	0.310461
MA0772.1_IRF7	CD56bright NK	0.000445644	0.00858458	0.00892286	-0.0163504	0.0129205	-8.71962e-05	0.00950418	0.00773435	0.00992189	0.192706	0.311731
MA0719.1_RHOXF1	CD56bright NK	-0.0089885	0.00363061	0.00336106	-0.0187315	0.000514732	0.00986237	-0.000324297	0.00427114	0.0047562	0.208807	0.334496
MA0844.1_XBP1	CD56bright NK	0.00460137	0.00306315	-0.00691657	-0.00274246	0.00413915	0.000911139	-0.00918949	-0.00965997	-0.00220064	0.211105	0.334926
MA0757.1_ONECUT3	CD56bright NK	-0.00194205	0.00244089	0.00447761	-0.00179743	0.00174643	0.0038298	-0.00398705	0.00268133	0.0122164	0.214245	0.33667
MA0083.3_SRF	CD56bright NK	-0.00208382	0.0149122	-0.00753219	0.00136825	0.0111204	0.0224958	0.00554615	0.00489897	-0.0307541	0.225721	0.351359
MA0663.1_MLX	CD56bright NK	-0.0069648	0.00236207	0.00415139	-0.0116294	-0.000967586	0.00902137	0.000355218	0.0121253	-0.00262076	0.231916	0.357627
MA0795.1_SMAD3	CD56bright NK	-0.00574429	0.00597974	-0.000166942	0.00250854	0.000336664	0.0172659	-0.00433577	0.00295984	-0.00103563	0.235799	0.360248
MA0862.1_GMEB2	CD56bright NK	-0.0114515	-0.00759475	0.00256865	-0.0145031	-0.0129036	0.00302293	-0.000580373	0.00334384	0.00376361	0.245044	0.370359
MA0664.1_MLXIPL	CD56bright NK	-0.00638323	0.00111264	0.00125849	-0.00841827	-0.00343492	0.0102077	0.00118962	0.00589859	-0.00410904	0.246906	0.370359
MA0636.1_BHLHE41	CD56bright NK	-0.00546008	0.00262781	0.00305205	-0.00523209	0.000267302	0.00734883	0.00892887	0.0142068	-0.0138797	0.259082	0.385122
MA0638.1_CREB3	CD56bright NK	-0.00598516	0.000567425	-0.00125355	-0.0141693	-0.000665116	0.00303251	-0.00233513	-0.00585635	0.00483742	0.270219	0.398091
MA0732.1_EGR3	CD56bright NK	-0.00152775	0.000341827	0.00151103	-0.00305578	0.000150632	0.000724218	0.0024442	0.000300537	0.00230116	0.288625	0.41823
MA0741.1_KLF16	CD56bright NK	-0.00137874	0.000820131	0.000985911	-0.00201827	0.000663358	0.00113368	0.00211267	0.000118074	0.00124722	0.288959	0.41823
MA0808.1_TEAD3	CD56bright NK	-0.0101628	-0.00155774	0.00668046	-0.00862915	-0.00624822	0.00782321	-0.00821941	0.00755183	0.0155971	0.301793	0.433008
MA0763.1_ETV3	CD56bright NK	-0.00244217	-0.00238864	0.00251799	-0.0173475	-0.00713325	0.00710057	0.000593453	0.00613657	-0.000420674	0.306025	0.435295
MA0729.1_RARA	CD56bright NK	-0.00118054	0.00182547	-0.00433162	-0.00361367	0.00320915	-0.000941884	-0.00830866	-0.00206426	-0.00432552	0.311703	0.439581
MA0088.2_ZNF143	CD56bright NK	-0.00249549	-0.00338759	0.00273422	-0.00892795	-0.0038043	-0.00255416	0.000108175	0.00240495	0.00486907	0.322204	0.450539
MA0668.1_NEUROD2	CD56bright NK	0.00943478	-0.00642731	0.000290554	0.00405651	-0.0111856	0.00308929	-0.00376047	0.00807706	-0.00609302	0.326847	0.453192
MA0639.1_DBP	CD56bright NK	-0.0159166	-0.000929973	-0.000667158	-0.00541576	-0.0017759	0.000761877	0.0100159	0.00732144	-0.0171092	0.347184	0.474918
MA0770.1_HSF2	CD56bright NK	-0.00260048	0.000662676	0.00227735	-0.00795597	-0.00189412	0.00577627	0.00915981	0.00120407	-0.00105879	0.350816	0.474918
MA0501.1_MAF::NFE2	CD56bright NK	-0.00686983	-0.00273708	-0.0144989	-0.00223224	-0.00581091	0.00341057	-0.0194448	-0.0103607	-0.0160294	0.351151	0.474918
MA0724.1_VENTX	CD56bright NK	-0.00207791	-0.00854286	0.00348586	-0.0112653	-0.00657154	-0.0124855	0.0116332	0.00554686	-0.00435021	0.363872	0.488121
MA0476.1_FOS	CD56bright NK	-0.00968649	-0.000768124	-0.0199748	-0.00697529	-0.00781627	0.0133282	-0.0289162	-0.00912647	-0.0266703	0.394982	0.52082
MA0848.1_FOXO4	CD56bright NK	0.00185905	-0.0105726	-0.00483534	0.00849338	-0.012866	-0.00598578	-0.00579411	-0.000659978	-0.00906742	0.400873	0.52082
MA0849.1_FOXO6	CD56bright NK	0.00185905	-0.0105726	-0.00483534	0.00849338	-0.012866	-0.00598578	-0.00579411	-0.000659978	-0.00906742	0.400873	0.52082
MA0850.1_FOXP3	CD56bright NK	0.00185905	-0.0105726	-0.00483534	0.00849338	-0.012866	-0.00598578	-0.00579411	-0.000659978	-0.00906742	0.400873	0.52082
MA0727.1_NR3C2	CD56bright NK	-0.0166531	-0.00788745	-0.00550321	-0.0132288	-0.00610936	-0.0114436	-0.0180569	-0.00356268	0.000601991	0.41558	0.534101
MA0837.1_CEBPE	CD56bright NK	-0.0107466	0.00461045	-0.00212879	-0.0401572	0.000987375	0.0118566	0.0119933	-0.00487875	-0.0083352	0.418468	0.534101
MA0762.1_ETV2	CD56bright NK	0.00132241	-0.00224971	-0.00531156	-0.00504665	-0.00699154	0.00723394	-0.00209524	0.000873616	-0.0146718	0.420807	0.534101
MA0478.1_FOSL2	CD56bright NK	-0.00879431	0.00296439	-0.0200764	-0.00243648	-0.00144373	0.0117806	-0.0372903	-0.00473356	-0.0265005	0.428488	0.539699
MA0777.1_MYBL2	CD56bright NK	-0.00208811	-0.00565843	0.000565874	-0.0112652	-0.0051994	-0.00657651	-0.00545323	0.000768795	0.00434187	0.433628	0.542034
MA0661.1_MEOX1	CD56bright NK	-0.00997966	0.000436317	-0.00572084	-0.00901224	-0.0017771	0.00486315	-0.0112928	-0.00361587	-0.00446199	0.437759	0.543085
MA0131.2_HINFP	CD56bright NK	-0.0012848	0.00106552	0.00265385	-0.00545279	0.00316667	-0.0031368	0.00771932	0.00547733	-0.0040172	0.441872	0.544096
MA0486.2_HSF1	CD56bright NK	-0.00320368	-0.001881	-0.000136115	-0.00831283	-0.00580077	0.00595853	-0.000546866	0.00289969	-0.00340406	0.451091	0.551334
MA0841.1_NFE2	CD56bright NK	-0.0109645	0.000662672	-0.0174704	-0.00577721	-0.00390869	0.00980539	-0.0321704	-0.0093274	-0.0171704	0.455149	0.552203
MA0793.1_POU6F2	CD56bright NK	-0.00478581	0.00116206	-0.00281977	-0.0085952	-0.000962596	0.00541136	-0.00807714	-0.00296978	0.000860154	0.476751	0.574189
MA0130.1_ZNF354C	CD56bright NK	-0.00109253	0.00109511	0.000235034	-0.0052961	-0.00213525	0.00755584	-0.000198849	-0.000424452	0.00129369	0.528576	0.631994
MA0628.1_POU6F1	CD56bright NK	-0.0133011	-0.00884207	-0.00365879	-0.0159448	-0.0127615	-0.00100318	0.0175932	-0.020365	0.00166386	0.556959	0.659846
MA0733.1_EGR4	CD56bright NK	-0.000103836	0.000261981	0.00179089	-0.00208892	0.00261136	-0.00443677	-0.000211639	0.00145809	0.00351417	0.560993	0.659846
MA0145.3_TFCP2	CD56bright NK	-0.00309194	-0.000916328	0.00648517	-0.0130875	-0.00351281	0.00427663	0.0154096	0.00487053	0.00241931	0.563869	0.659846
MA0838.1_CEBPG	CD56bright NK	-0.0108392	-0.00424803	0.00210396	-0.0398934	-0.00644658	0.000149056	0.0260558	-0.00750719	-0.0026509	0.59712	0.693837
MA0754.1_CUX1	CD56bright NK	0.00843833	0.000857148	0.000473303	-0.00673177	-0.00629894	0.0151693	0.014844	-0.00222167	-0.00596304	0.606377	0.699666
MA0510.2_RFX5	CD56bright NK	0.00247604	-0.00548884	0.00175323	0.00974596	-0.00734926	-0.001768	-0.00439214	0.00343145	0.00389221	0.615953	0.705779
MA0488.1_JUN	CD56bright NK	-0.00185597	0.00700776	0.00148085	-0.0111656	0.00917852	0.00266625	-0.0027766	0.00304376	0.00249577	0.621013	0.70667
MA0472.2_EGR2	CD56bright NK	6.51254e-05	0.000615972	0.00176206	-0.00183021	0.0025433	-0.00323868	0.00151035	0.000510093	0.0033905	0.634833	0.717449
MA0475.2_FLI1	CD56bright NK	-0.00147569	-0.00206871	0.00070716	-0.017295	-0.00650972	0.0068133	0.00261966	0.00324499	-0.00352864	0.67287	0.755262
MA0863.1_MTF1	CD56bright NK	-0.00190314	-0.000620971	-0.00451321	-0.00675459	-0.00514884	0.00843477	-0.00313447	-0.00360668	-0.00648998	0.680156	0.758282
MA0474.2_ERG	CD56bright NK	-0.00134593	0.000206026	0.00062737	-0.0150081	-0.00518351	0.0109851	0.00604717	0.00152732	-0.00403577	0.710673	0.786987
MA0466.2_CEBPB	CD56bright NK	-0.0081896	0.00296653	-0.000760763	-0.0402734	-0.000410924	0.00972143	0.0191049	-0.00410024	-0.0101085	0.733535	0.806889
MA0774.1_MEIS2	CD56bright NK	-0.00151768	-0.00205867	-0.00387228	0.0058578	-0.00143946	-0.00329709	-0.00683462	-0.00170606	-0.00442463	0.745633	0.814764
MA0259.1_ARNT::HIF1A	CD56bright NK	-0.00502383	-0.00322433	-0.00157025	0.00110171	-0.00545744	0.00124189	-0.00106712	-0.00592148	0.00317078	0.754482	0.819011
MA0655.1_JDP2	CD56bright NK	-0.0120132	-0.00126326	-0.0166019	-0.015891	-0.00631052	0.00883126	-0.0344622	-0.0097844	-0.0126487	0.781728	0.84304
MA0799.1_RFX4	CD56bright NK	-0.000879451	-0.00310947	0.00133499	0.00938016	-0.00236078	-0.00460685	0.00346188	-0.00195585	0.00375638	0.802918	0.859564
MA0498.2_MEIS1	CD56bright NK	0.000495161	0.00489038	-0.00552137	0.00239294	0.00657062	0.0015299	-0.00591556	-0.00304203	-0.00815114	0.80747	0.859564
MA0074.1_RXRA::VDR	CD56bright NK	0.00186308	0.00409845	0.000491869	0.00336336	0.0075924	-0.00288944	0.000394525	0.00455219	-0.00418027	0.812757	0.859647
MA0106.3_TP53	CD56bright NK	-0.00444383	0.00251664	-0.00490696	-0.00553343	0.0040915	-0.000633074	-0.00171023	0.00916372	-0.0234539	0.820313	0.862112
MA0771.1_HSF4	CD56bright NK	-0.00389702	-0.00324793	-0.00217595	-0.000200334	-0.00838749	0.00703117	-0.00347719	0.00668335	-0.0116443	0.827911	0.86459
MA0098.3_ETS1	CD56bright NK	-1.33445e-05	-0.00137645	-0.00142533	-0.015423	-0.00657909	0.00902883	-0.0029299	0.00468627	-0.00755249	0.838751	0.870402
MA0749.1_ZBED1	CD56bright NK	-0.00602961	-0.0101701	-0.00102249	-0.019416	-0.0184737	0.00643703	-0.00483938	0.0119131	-0.0135694	0.870871	0.898085
MA0076.2_ELK4	CD56bright NK	-6.81874e-05	-0.000823735	0.000831242	-0.0134374	-0.00387124	0.00527127	0.00420581	0.00460074	-0.00581621	0.877278	0.899074
MA0138.2_REST	CD56bright NK	0.000561568	-0.00185421	-0.00131769	0.00134467	-0.00177467	-0.00201329	0.00164381	-0.00188934	-0.0026251	0.889831	0.90631
MA0692.1_TFEB	CD56bright NK	0.000189512	0.000535761	-0.000431154	-0.00267806	-0.00255187	0.00671102	-0.00668583	0.00367271	-0.00104921	0.904367	0.915463
MA0760.1_ERF	CD56bright NK	0.00167026	-0.000530045	-0.00124618	-0.011982	-0.00596379	0.0103374	0.00309521	0.002529	-0.00854482	0.926125	0.931772
MA0600.2_RFX2	CD56bright NK	-0.000608892	-0.00219083	0.00169476	0.0127855	-0.00397051	0.00136855	0.00723535	-0.00397948	0.00462098	0.949946	0.949946
MA0797.1_TGIF2	CD56dim NK	-0.00121159	0.0084536	-0.0112126	-0.00144461	0.00904844	0.00726392	-0.0134073	-0.00710846	-0.0145376	0.000272515	0.0142146	0.0805752	0.0532274	7.39745e-05	0.0805752	0.0798411	0.000221924
MA0137.3_STAT1	CD56dim NK	-0.00177655	-0.00299821	0.00549514	-0.00495014	-0.00384074	-0.00131315	0.00485511	0.00708869	0.00406268	0.00029373	0.0142146	0.575157	0.00838882	0.000127995	0.575157	0.0125832	0.000383986
MA0689.1_TBX20	CD56dim NK	0.0135024	0.0116121	-0.0208709	0.00652897	0.0146508	0.00553489	-0.0107595	-0.0175312	-0.0315082	0.000307002	0.0142146	0.620928	0.00388867	0.000217783	0.620928	0.005833	0.000653348
MA0806.1_TBX4	CD56dim NK	0.0075303	0.0132229	-0.0223999	0.00695403	0.0181574	0.00335392	-0.0186209	-0.0210329	-0.0265142	0.000411267	0.0142146	0.973699	0.00722664	0.000182763	0.973699	0.01084	0.000548289
MA0801.1_MGA	CD56dim NK	0.0072936	0.0163536	-0.0206352	0.00887788	0.0190977	0.0108655	-0.0113299	-0.0154593	-0.0328773	0.000455373	0.0142146	0.448279	0.0129414	0.000182763	0.448279	0.0194121	0.000548289
MA0803.1_TBX15	CD56dim NK	0.0072936	0.0163536	-0.0206352	0.00887788	0.0190977	0.0108655	-0.0113299	-0.0154593	-0.0328773	0.000455373	0.0142146	0.448279	0.0129414	0.000182763	0.448279	0.0194121	0.000548289
MA0802.1_TBR1	CD56dim NK	0.0141136	0.0121398	-0.0225974	0.00880255	0.0152079	0.00600357	-0.0113621	-0.0196637	-0.0335103	0.000525688	0.0142146	0.531045	0.00388867	0.000508879	0.531045	0.005833	0.00152664
MA0805.1_TBX1	CD56dim NK	0.00932036	0.0123814	-0.0219637	0.00656274	0.0150265	0.0070913	-0.0159144	-0.0183548	-0.030207	0.000580883	0.0142146	0.973699	0.00722664	0.000307521	0.973699	0.01084	0.000922563
MA0690.1_TBX21	CD56dim NK	0.0121383	0.014337	-0.0214123	0.00750278	0.0177554	0.00750025	-0.011341	-0.0186887	-0.031304	0.000727261	0.0142146	0.973699	0.00532584	0.000599683	0.973699	0.00798876	0.00179905
MA0800.1_EOMES	CD56dim NK	0.0131535	0.0139742	-0.0217317	0.00795663	0.0181597	0.00560327	-0.0121526	-0.0192205	-0.0310477	0.000744955	0.0142146	0.716859	0.00722664	0.000431028	0.716859	0.01084	0.00129308
MA0688.1_TBX2	CD56dim NK	0.0104879	0.012905	-0.0230315	0.00858944	0.0162815	0.00615201	-0.0135469	-0.0199053	-0.0330017	0.00079776	0.0142146	0.921212	0.0112259	0.000307521	0.921212	0.0168389	0.000922563
MA0796.1_TGIF1	CD56dim NK	0.000336205	0.00918899	-0.0103088	0.00283286	0.0115447	0.00447755	-0.0142732	-0.00635619	-0.0122772	0.000979193	0.015235	0.106206	0.0668543	0.000307521	0.106206	0.100282	0.000922563
MA0755.1_CUX2	CD56dim NK	-0.012908	-0.0118444	0.0121892	0.00308433	-0.0162354	-0.00306236	0.00822132	0.0088835	0.0186912	0.00101049	0.015235	0.620928	0.00170045	0.00279938	0.620928	0.00419907	0.00419907
MA0095.2_YY1	CD56dim NK	-0.00836335	-0.00866099	0.00827044	-0.0112737	-0.011352	-0.00327896	0.00677737	0.00887972	0.00855498	0.00112858	0.0158002	0.973699	0.0195566	0.000307521	0.973699	0.0293348	0.000922563
MA0160.1_NR4A2	CD56dim NK	-0.00263682	0.00526681	-0.00515581	-0.00527692	0.00618889	0.00342265	-0.00688387	-0.00158165	-0.00817361	0.0012319	0.0160968	0.0192424	0.407411	0.000364412	0.0288637	0.407411	0.00109323
MA0804.1_TBX19	CD56dim NK	0.000669521	0.00891407	-0.0140832	0.00561681	0.0103715	0.00599927	-0.0173295	-0.00836421	-0.0185912	0.00143056	0.0175244	0.156288	0.0223399	0.000970591	0.156288	0.0335098	0.00291177
MA0511.2_RUNX2	CD56dim NK	0.00489842	0.00267393	-0.0193087	0.0145007	-0.000109284	0.00824035	-0.00996197	-0.015796	-0.0296379	0.00190681	0.0219844	0.531045	0.00388867	0.003727	0.531045	0.005833	0.005833
MA0596.1_SREBF2	CD56dim NK	-0.00209813	0.00906405	-0.0112283	-0.00533562	0.0100584	0.00707526	-0.00595309	-0.0081481	-0.0183388	0.00298473	0.0325004	0.137913	0.138557	0.000705386	0.138557	0.138557	0.00211616
MA0899.1_HOXA10	CD56dim NK	0.000134941	-0.00492114	0.00559217	-0.00390186	-0.00806528	0.00136715	0.00358082	0.00338167	0.00951199	0.00371428	0.0370986	0.198516	0.0473361	0.00179754	0.198516	0.0710041	0.00539261
MA0634.1_ALX3	CD56dim NK	-0.000646073	-0.00704878	0.00622431	-0.00621023	-0.00989734	-0.00135166	0.00381619	0.00542314	0.00876441	0.0038468	0.0370986	0.0926813	0.167351	0.00113538	0.139022	0.167351	0.00340615
MA0488.1_JUN	CD56dim NK	-0.00353927	0.00774593	-0.00488341	-0.00290963	0.0102758	0.00268624	-0.00494189	-0.00219759	-0.00797787	0.00407357	0.0370986	0.0134105	0.598054	0.00208737	0.0201158	0.598054	0.0062621
MA0159.1_RARA::RXRA	CD56dim NK	0.000733858	0.00548878	-0.00569841	1.21417e-05	0.00667898	0.00310838	-0.00602428	-0.00650625	-0.00453867	0.00416413	0.0370986	0.276605	0.167351	0.000599683	0.276605	0.251027	0.00179905
MA0630.1_SHOX	CD56dim NK	0.000716133	-0.00566195	0.00804119	-0.00248156	-0.00925791	0.00152998	0.00561473	0.00458291	0.0136935	0.00464057	0.037898	0.137913	0.138557	0.00132572	0.138557	0.138557	0.00397715
MA0717.1_RAX2	CD56dim NK	0.000716133	-0.00566195	0.00804119	-0.00248156	-0.00925791	0.00152998	0.00561473	0.00458291	0.0136935	0.00464057	0.037898	0.137913	0.138557	0.00132572	0.138557	0.138557	0.00397715
MA0070.1_PBX1	CD56dim NK	-0.0026336	-0.00336218	0.00454236	-0.00730483	-0.00275144	-0.00458366	0.0053428	0.00314703	0.0056366	0.00547012	0.0420989	0.716859	0.0668543	0.00113538	0.716859	0.100282	0.00340615
MA0073.1_RREB1	CD56dim NK	0.0015174	0.0042119	-0.00696367	0.00149519	0.00444759	0.0037405	-0.00157754	-0.00658792	-0.0109928	0.00558454	0.0420989	0.488718	0.0195566	0.00428869	0.488718	0.0293348	0.0128661
MA0665.1_MSC	CD56dim NK	0.00207898	0.000570304	-0.00578484	0.00533715	0.0001925	0.00132591	-0.00278704	-0.00320359	-0.0107948	0.00650249	0.0445039	0.488718	0.0112259	0.00842106	0.488718	0.0168389	0.0168389
MA0786.1_POU3F1	CD56dim NK	-0.000838378	-0.00262319	0.00491301	-0.00728586	-0.00249936	-0.00287085	0.00471291	0.00463802	0.00536722	0.00661347	0.0445039	0.716859	0.0223399	0.00428869	0.716859	0.0335098	0.0128661
MA0513.1_SMAD2::SMAD3::SMAD4	CD56dim NK	-0.00338659	0.0118258	-0.0182033	0.0104849	0.0110234	0.0134307	-0.01703	-0.0153733	-0.0222872	0.00673876	0.0445039	0.198516	0.167351	0.00154512	0.198516	0.198516	0.00463536
MA0113.3_NR3C1	CD56dim NK	-0.0101358	-0.00300516	0.00125063	-0.0135517	-0.00678579	0.00455611	-0.00448736	0.00677524	-0.00136942	0.00681183	0.0445039	0.0602125	0.00331122	0.126591	0.0903188	0.00993366	0.126591
MA0754.1_CUX1	CD56dim NK	-0.00838944	-0.0155054	0.00646724	0.00857612	-0.0202763	-0.00596376	0.00426669	0.0042299	0.0105445	0.00790273	0.0494312	0.276605	0.0832321	0.00279938	0.276605	0.124848	0.00839813
MA0066.1_PPARG	CD56dim NK	-0.0058937	0.00452905	-0.00352386	-0.00153607	0.00407121	0.00544472	-0.00653588	-0.00316049	-0.00193977	0.00807041	0.0494312	0.0134105	0.563662	0.005648	0.0201158	0.563662	0.016944
MA0791.1_POU4F3	CD56dim NK	-0.00260986	-0.00665729	0.00832288	-0.00404856	-0.00891212	-0.00214764	0.00313281	0.00319586	0.0177644	0.00832626	0.0494529	0.339021	0.0668543	0.003233	0.339021	0.100282	0.00969899
MA0772.1_IRF7	CD56dim NK	-0.0110184	0.000273865	0.00675405	-0.0170053	0.00289832	-0.00497505	0.00753981	0.00674706	0.00623836	0.00869103	0.0500532	0.0134105	0.00532584	0.465004	0.0201158	0.0159775	0.465004
MA0497.1_MEF2C	CD56dim NK	-0.0049994	0.00262243	-0.00117065	-0.00814266	0.00225588	0.00335553	0.00401713	-0.00286864	-0.00264818	0.00916852	0.0500532	0.00919942	0.167351	0.0200859	0.0275983	0.167351	0.0301289
MA0785.1_POU2F1	CD56dim NK	-0.000823271	-0.0041992	0.00533858	-0.00625181	-0.0048271	-0.00294338	0.00803201	0.00265156	0.00667781	0.00919344	0.0500532	0.339021	0.0668543	0.003727	0.339021	0.100282	0.011181
MA0506.1_NRF1	CD56dim NK	-0.00828162	-0.006477	0.00527442	-0.013426	-0.00890721	-0.0016166	0.00502976	0.00840108	0.00178976	0.0097651	0.0517286	0.973699	0.0746771	0.00208737	0.973699	0.112016	0.0062621
MA0648.1_GSC	CD56dim NK	-0.00504377	-0.00333215	0.0055236	-0.0063351	-0.00558994	0.00118344	0.00991229	0.00333294	0.00515357	0.0101636	0.0523914	0.668216	0.00971542	0.0178353	0.668216	0.0267529	0.0267529
MA0144.2_STAT3	CD56dim NK	-0.00134938	-0.00289711	0.00266395	-0.00130987	-0.00355818	-0.00157497	0.00249165	0.00360856	0.00167678	0.0108305	0.0523914	0.373378	0.0597191	0.0049261	0.373378	0.0895787	0.0147783
MA0051.1_IRF2	CD56dim NK	-0.0111091	-0.000950283	0.00881684	-0.0172024	0.00146234	-0.00577552	0.00872727	0.00905336	0.00860062	0.0109552	0.0523914	0.0926813	0.00388867	0.176836	0.139022	0.011666	0.176836
MA0641.1_ELF4	CD56dim NK	-0.00513292	-0.00542859	0.00236716	-0.00599589	-0.00790412	-0.000477521	0.00594282	0.00412935	-0.00207251	0.0109594	0.0523914	0.817483	0.0148849	0.0123542	0.817483	0.0223273	0.0223273
MA0046.2_HNF1A	CD56dim NK	-0.00539095	-0.00724072	0.0057858	-0.00392302	-0.0101794	-0.00136346	0.00311614	0.00525261	0.00818763	0.0115174	0.0537479	0.921212	0.0371874	0.005648	0.921212	0.0557812	0.016944
MA0112.3_ESR1	CD56dim NK	-0.00345166	0.00478768	-0.00440857	-0.00503047	0.00478413	0.00479478	-0.00230039	-0.0028347	-0.00765021	0.0121008	0.0546199	0.0926813	0.782431	0.00208737	0.139022	0.782431	0.0062621
MA0660.1_MEF2B	CD56dim NK	-0.0073244	0.00495471	0.000159897	-0.0148685	0.00531985	0.00422441	0.0080894	-0.000562023	-0.0042842	0.0125222	0.0546199	0.00412677	0.0532274	0.206948	0.0123803	0.0798411	0.206948
MA0790.1_POU4F1	CD56dim NK	-0.00145493	-0.00785238	0.00955775	-0.00195639	-0.012226	0.000894903	0.00318626	0.00507108	0.0190399	0.0129077	0.0546199	0.137913	0.0925644	0.00738457	0.137913	0.137913	0.0221537
MA0597.1_THAP1	CD56dim NK	-0.000778936	0.00223476	-0.00460285	0.00163479	0.00131347	0.00407733	-0.00510127	-0.00228621	-0.00697332	0.0129566	0.0546199	0.276605	0.238029	0.0024195	0.276605	0.276605	0.00725851
MA0715.1_PROP1	CD56dim NK	-0.00469895	-0.00609922	0.00644499	-0.00508533	-0.00783527	-0.00262712	0.00744651	0.00529052	0.0071242	0.0132611	0.0546199	0.716859	0.0328502	0.00842106	0.716859	0.0492752	0.0252632
MA0727.1_NR3C2	CD56dim NK	-0.00951256	-0.00553384	0.000104975	-0.0113023	-0.00908632	0.00157111	-0.00289691	0.00342242	-0.00176412	0.0136055	0.0546199	0.448279	0.0112259	0.028387	0.448279	0.0336777	0.0425804
MA0757.1_ONECUT3	CD56dim NK	-0.00672208	-0.00755962	0.00666676	0.000410116	-0.0108542	-0.000970429	0.00342671	0.00259583	0.0135762	0.0141608	0.0546199	0.766679	0.0129414	0.0200859	0.766679	0.0301289	0.0301289
MA0699.1_LBX2	CD56dim NK	-0.000649351	-0.00478591	0.00647389	-0.00370568	-0.00815638	0.00195504	0.00630671	0.00581522	0.00735379	0.014212	0.0546199	0.448279	0.138557	0.003233	0.448279	0.207836	0.00969899
MA0101.1_REL	CD56dim NK	-0.00475958	0.0157386	-0.0203412	0.00628999	0.0195138	0.00818837	-0.00899079	-0.015274	-0.0338199	0.0142123	0.0546199	0.137913	0.0925644	0.00842106	0.137913	0.137913	0.0252632
MA0050.2_IRF1	CD56dim NK	-0.00577539	0.000139877	0.00255634	-0.00750186	0.00101976	-0.00161989	0.00561072	0.00220058	0.000935147	0.0151912	0.0572593	0.0192424	0.00838882	0.610592	0.0288637	0.0251664	0.610592
MA0595.1_SREBF1	CD56dim NK	0.00123651	0.00885205	-0.0141438	-0.00027321	0.00901127	0.00853361	-0.00740677	-0.0101742	-0.0232664	0.0161759	0.0597834	0.339021	0.0925644	0.006464	0.339021	0.138847	0.019392
MA0107.1_RELA	CD56dim NK	-0.00347112	0.0147631	-0.0193621	0.00689334	0.0190487	0.00619188	-0.00873644	-0.0170199	-0.0291783	0.0164709	0.0597834	0.156288	0.138557	0.00738457	0.156288	0.156288	0.0221537
MA0652.1_IRF8	CD56dim NK	-0.0128897	0.000500741	0.00973668	-0.0228462	0.00535105	-0.00919987	0.00996046	0.0120236	0.00691945	0.0182968	0.0652031	0.0926813	0.00532584	0.319096	0.139022	0.0159775	0.319096
MA0788.1_POU3F3	CD56dim NK	-0.000998668	-0.00359216	0.006091	-0.00754457	-0.00487081	-0.00103485	0.00396562	0.00341444	0.0106306	0.0186623	0.0653182	0.716859	0.0668543	0.00738457	0.716859	0.100282	0.0221537
MA0837.1_CEBPE	CD56dim NK	-0.015692	0.00232749	0.000316782	-0.0130427	0.00715426	-0.00732605	-0.00619663	0.00316118	0.00134059	0.019897	0.0684177	0.0192424	0.0112259	0.947043	0.0288637	0.0288637	0.947043
MA0698.1_ZBTB18	CD56dim NK	-0.00148856	0.00338435	-0.00623755	0.00275455	0.00193711	0.00627883	-0.00633866	-0.00444858	-0.00825728	0.0203121	0.0685978	0.276605	0.379581	0.003233	0.379581	0.379581	0.00969899
MA0774.1_MEIS2	CD56dim NK	-0.00238086	0.00180557	-0.00359	-0.00242899	0.00264673	0.000123247	-0.00579458	-0.00239277	-0.00351706	0.0206493	0.0685978	0.0321142	0.706491	0.0108921	0.0481713	0.706491	0.0326762
MA0843.1_TEF	CD56dim NK	-0.0139376	-0.0023846	0.00425152	-0.0087955	1.76203e-05	-0.00718904	-0.0024209	0.00183029	0.0115246	0.0226906	0.0713388	0.248535	0.00455617	0.24062	0.248535	0.0136685	0.248535
MA0653.1_IRF9	CD56dim NK	-0.0120858	0.0013333	0.00639297	-0.0216629	0.00552196	-0.00704403	0.00702168	0.00755245	0.00462112	0.0229695	0.0713388	0.0229142	0.0129414	0.73981	0.0343713	0.0343713	0.73981
MA0822.1_HES7	CD56dim NK	-0.0062977	0.00346311	-0.00320283	-0.00645387	0.00213057	0.00612818	-0.00234308	-0.00193493	-0.00525523	0.0230288	0.0713388	0.0160957	0.152437	0.0598453	0.048287	0.152437	0.0897679
MA0773.1_MEF2D	CD56dim NK	-0.00603658	0.00387781	0.00114939	-0.00982081	0.00306435	0.00550473	0.00642356	-0.00131592	0.000509457	0.0231238	0.0713388	0.00757404	0.0532274	0.364008	0.0227221	0.0798411	0.364008
MA0756.1_ONECUT2	CD56dim NK	-0.00761691	-0.00998496	0.00625564	-0.00337304	-0.0121452	-0.00566444	0.00874046	0.000816635	0.0109446	0.0235448	0.0713388	0.817483	0.0532274	0.0123542	0.817483	0.0798411	0.0370626
MA0141.3_ESRRB	CD56dim NK	-0.00503328	0.00157396	-0.00167276	-0.00695583	0.000759945	0.00320199	-0.00534778	0.0013402	-0.00273786	0.0236583	0.0713388	0.0111292	0.125672	0.106041	0.0333877	0.125672	0.125672
MA0671.1_NFIX	CD56dim NK	-0.00421659	0.00217607	-0.00225172	-0.00550348	-0.00014914	0.00682649	-0.00230394	-0.00328125	-0.00101577	0.0246562	0.0732215	0.0229142	0.167351	0.0439283	0.0658925	0.167351	0.0658925
MA0724.1_VENTX	CD56dim NK	0.00389244	-0.00484879	0.00450172	-0.0112294	-0.00282116	-0.00890405	0.00386119	0.00729261	0.0016727	0.0255497	0.0733866	0.0517542	0.900109	0.00958579	0.0776313	0.900109	0.0287574
MA0821.1_HES5	CD56dim NK	-0.00638464	0.00506123	-0.00257662	-0.00675626	0.00347185	0.00823997	-0.00276926	9.88498e-05	-0.00556956	0.0258296	0.0733866	0.0517542	0.379581	0.0123542	0.0776313	0.379581	0.0370626
MA0792.1_POU5F1B	CD56dim NK	-0.00207494	-0.00307048	0.00421018	-0.00789222	-0.00331259	-0.00258625	0.00716668	0.00319793	0.00342014	0.0258351	0.0733866	0.921212	0.0597191	0.0123542	0.921212	0.0895787	0.0370626
MA0657.1_KLF13	CD56dim NK	-0.00341748	0.000257895	0.00531645	-0.00340983	0.000738777	-0.000703869	0.00595791	0.0019136	0.0088588	0.0275645	0.0771807	0.156288	0.0129414	0.150115	0.156288	0.0388242	0.156288
MA0778.1_NFKB2	CD56dim NK	-0.0026788	0.0185767	-0.0202116	0.00588484	0.0225577	0.0106146	-0.00923975	-0.0136032	-0.035236	0.028295	0.07811	0.176462	0.218646	0.0108921	0.218646	0.218646	0.0326762
MA0666.1_MSX1	CD56dim NK	-0.00102319	-0.00341409	0.00900338	0.00188278	-0.00555604	0.000869801	0.00344946	0.00454545	0.0179069	0.0301737	0.0802551	0.575157	0.125672	0.00958579	0.575157	0.188508	0.0287574
MA0708.1_MSX2	CD56dim NK	-0.00102319	-0.00341409	0.00900338	0.00188278	-0.00555604	0.000869801	0.00344946	0.00454545	0.0179069	0.0301737	0.0802551	0.575157	0.125672	0.00958579	0.575157	0.188508	0.0287574
MA0661.1_MEOX1	CD56dim NK	-0.0016037	-0.00379553	0.00790327	-0.00138703	-0.0060357	0.000684794	0.0100302	0.00620183	0.00847036	0.0303232	0.0802551	0.488718	0.218646	0.006464	0.488718	0.327969	0.019392
MA0131.2_HINFP	CD56dim NK	-0.00360555	-0.00332722	0.00276919	-0.00788424	-0.00557426	0.00116686	0.00400299	0.00431689	0.000141001	0.0310583	0.0802551	0.716859	0.200423	0.005648	0.716859	0.300635	0.016944
MA0776.1_MYBL1	CD56dim NK	-0.0134805	0.00333378	-0.0029988	-0.00867955	-0.00294104	0.0158834	-0.00568934	-0.000323989	-0.00432573	0.0311745	0.0802551	0.0134105	0.0668543	0.277976	0.0402316	0.100282	0.277976
MA0115.1_NR1H2::RXRA	CD56dim NK	-0.003812	0.0038361	-0.00131914	-0.00928985	0.00450346	0.0025014	-0.00291807	7.92419e-05	-0.00188463	0.0327358	0.0802551	0.0192424	0.352952	0.0487819	0.0577273	0.352952	0.0731728
MA0105.4_NFKB1	CD56dim NK	-0.0043384	0.0146284	-0.018447	0.00165242	0.0169002	0.0100847	-0.010296	-0.0105702	-0.0330705	0.0329649	0.0802551	0.156288	0.280362	0.0123542	0.234432	0.280362	0.0370626
MA0145.3_TFCP2	CD56dim NK	-0.00773887	-0.0010674	0.00474545	-0.00267821	-0.00193136	0.000660514	0.00419814	0.00477343	0.00507769	0.0331541	0.0802551	0.137913	0.0223399	0.115958	0.137913	0.0670197	0.137913
MA0787.1_POU3F2	CD56dim NK	-0.00234008	-0.00104134	0.00440022	-0.00644835	-0.000162268	-0.00279949	0.00476968	0.00281716	0.00600083	0.0333389	0.0802551	0.668216	0.0254614	0.0439283	0.668216	0.0658925	0.0658925
MA0914.1_ISL2	CD56dim NK	-0.00375974	-0.00395828	0.00381068	-0.00544813	-0.00763264	0.00339045	0.00594698	0.00424482	0.00187999	0.0335514	0.0802551	0.921212	0.0289535	0.0354365	0.921212	0.0531547	0.0531547
MA0738.1_HIC2	CD56dim NK	-0.00455492	0.00255442	-0.00221204	-0.00127229	0.0014205	0.00482225	-0.00202384	-0.000525266	-0.00430541	0.0335761	0.0802551	0.0192424	0.280362	0.0598453	0.0577273	0.280362	0.0897679
MA0686.1_SPDEF	CD56dim NK	-0.00381463	-0.00666867	0.00312418	-0.00877789	-0.010004	1.8902e-06	0.00602785	0.00205251	0.00243867	0.0345216	0.081521	0.668216	0.0832321	0.0158088	0.668216	0.124848	0.0474263
MA0071.1_RORA	CD56dim NK	0.00121466	0.00160746	-0.00786354	-0.000202842	0.00478995	-0.00475751	-0.00487524	-0.00434655	-0.0139589	0.0357723	0.0825979	0.817483	0.042003	0.028387	0.817483	0.0630045	0.0630045
MA0758.1_E2F7	CD56dim NK	-0.0042974	-0.0036822	0.00418188	-0.0111353	-0.00395847	-0.00312966	0.00557287	0.00230158	0.00544825	0.0358205	0.0825979	1	0.0597191	0.0200859	1	0.0895787	0.0602577
MA0736.1_GLIS2	CD56dim NK	-0.00286865	0.00449034	-0.00177536	-0.00325394	0.00468087	0.00410927	-0.00309068	-0.000117254	-0.00283295	0.0367108	0.0836666	0.0443138	0.706491	0.0200859	0.0664707	0.706491	0.0602577
MA0507.1_POU2F2	CD56dim NK	-0.00205525	-0.00281092	0.00316314	-0.00446192	-0.00282776	-0.00277724	0.00274192	0.00458428	0.00178596	0.0381719	0.0859964	0.620928	0.0289535	0.0439283	0.620928	0.0658925	0.0658925
MA0059.1_MAX::MYC	CD56dim NK	-0.00488809	0.00271197	-0.00399794	-0.00769331	0.00027651	0.00758289	-0.00437232	-0.00197308	-0.00611068	0.0405083	0.0902231	0.0517542	0.782431	0.0200859	0.0776313	0.782431	0.0602577
MA0662.1_MIXL1	CD56dim NK	0.00279968	-0.00602752	0.00348157	0.000921809	-0.00812448	-0.00183358	0.00418165	0.00332804	0.00319395	0.0426059	0.0938288	0.0443138	0.669538	0.0253401	0.0664707	0.669538	0.0664707
MA0478.1_FOSL2	CD56dim NK	-0.00476078	0.0259973	-0.0118078	4.01748e-05	0.0430659	-0.00813974	-0.0064472	-0.00659859	-0.021459	0.0433802	0.0944724	0.0602125	0.821245	0.0200859	0.0903188	0.821245	0.0602577
MA0707.1_MNX1	CD56dim NK	0.0025721	-0.0028389	0.00712361	-0.00438328	-0.00171935	-0.00507801	0.00292373	0.00610543	0.0111114	0.0500846	0.107874	0.176462	0.30334	0.0200859	0.264693	0.30334	0.0602577
MA0759.1_ELK3	CD56dim NK	-0.00611687	-0.00726445	0.00401455	-0.0090834	-0.0113997	0.00100602	0.00759269	0.00438767	0.00119381	0.0518052	0.110368	0.668216	0.167351	0.0158088	0.668216	0.251027	0.0474263
MA0486.2_HSF1	CD56dim NK	-0.00461076	-0.00141762	0.0029167	-0.00940014	-0.00440037	0.00454788	0.00459528	0.00357156	0.00103364	0.0533564	0.110857	0.198516	0.0328502	0.137967	0.198516	0.0985505	0.198516
MA0691.1_TFAP4	CD56dim NK	0.0028622	-0.000780792	-0.00519235	0.00386367	-0.000919601	-0.000503174	-0.0036403	-0.00344811	-0.00826201	0.054021	0.110857	0.448279	0.0328502	0.0882301	0.448279	0.0985505	0.132345
MA0466.2_CEBPB	CD56dim NK	-0.0147272	0.00154929	-0.000498118	-0.00925739	0.00543411	-0.00622036	-0.0107366	0.00215449	0.00323281	0.0540373	0.110857	0.0229142	0.0473361	1	0.0687425	0.0710041	1
MA0476.1_FOS	CD56dim NK	-0.00558392	0.0284536	-0.0105605	-0.00241207	0.0461636	-0.00696654	-0.00817941	-0.00394983	-0.0198602	0.0542971	0.110857	0.0697861	0.821245	0.0253401	0.104679	0.821245	0.0760204
MA0639.1_DBP	CD56dim NK	-0.00936658	-0.00176541	0.00382097	-0.00645853	-0.00154749	-0.00220126	-0.00118311	0.00526867	0.00546804	0.056987	0.115149	0.306762	0.0289535	0.137967	0.306762	0.0868604	0.20695
MA0694.1_ZBTB7B	CD56dim NK	-0.00591175	0.000143287	0.000719455	-0.00533956	-0.000944674	0.00231921	0.000371503	0.0015892	-6.32848e-05	0.0587861	0.117572	0.0377971	0.0371874	0.911853	0.0566956	0.0566956	0.911853
MA0501.1_MAF::NFE2	CD56dim NK	-0.00501252	0.0095335	-0.00326268	-0.003831	0.0173784	-0.00615636	0.0052446	-0.00119769	-0.0113433	0.0608208	0.120413	0.0443138	0.74415	0.0439283	0.0664707	0.74415	0.0664707
MA0825.1_MNT	CD56dim NK	-0.00735709	0.00422343	-0.00259834	-0.00801394	0.00184573	0.00897883	-0.00788882	0.000894428	-0.00314625	0.0614682	0.120459	0.0443138	0.352952	0.0661139	0.0991708	0.352952	0.0991708
MA0028.2_ELK1	CD56dim NK	-0.00553121	-0.00698999	0.00343848	-0.00993299	-0.0105519	0.000133925	0.0065932	0.0042561	0.000381434	0.0620734	0.120459	0.575157	0.167351	0.0225805	0.575157	0.251027	0.0677416
MA0737.1_GLIS3	CD56dim NK	-0.00605701	0.00325292	-0.00498763	-0.0032319	0.00104849	0.00766178	-0.0040616	-0.00306562	-0.00784734	0.068488	0.131604	0.0377971	0.74415	0.0598453	0.0897679	0.74415	0.0897679
MA0140.2_GATA1::TAL1	CD56dim NK	0.00372052	-0.00129359	-0.00645251	0.00539685	-0.00262027	0.00135977	-0.00135624	-0.00647612	-0.00982247	0.0701461	0.133482	0.448279	0.042003	0.106041	0.448279	0.126009	0.159061
MA0139.1_CTCF	CD56dim NK	-0.00453379	-0.0194605	0.0152786	-0.0128602	-0.0234786	-0.0114242	0.000174415	0.0101882	0.031287	0.0727121	0.136229	0.248535	0.258595	0.0317443	0.258595	0.258595	0.0952328
MA0729.1_RARA	CD56dim NK	-0.00618318	0.00300362	-0.00171608	-0.00672014	0.00236499	0.0042809	-3.6359e-06	0.000519211	-0.00546554	0.0729799	0.136229	0.0192424	0.238029	0.258831	0.0577273	0.258831	0.258831
MA0655.1_JDP2	CD56dim NK	-0.00459115	0.0292665	-0.00868572	0.000401489	0.0476027	-0.00740591	0.00350208	-0.0052931	-0.020769	0.0739374	0.136714	0.0805752	1	0.0354365	0.120863	1	0.106309
MA0845.1_FOXB1	CD56dim NK	-0.00295959	-0.00470113	0.00242403	-0.000389936	-0.0068766	-0.000350196	-0.00144303	0.00272945	0.00464575	0.0761673	0.139072	0.869066	0.0746771	0.0540779	0.869066	0.112016	0.112016
MA0664.1_MLXIPL	CD56dim NK	-0.00372818	-0.0044669	0.0018028	-0.00904546	-0.00636624	-0.000668225	0.00230627	0.000914101	0.00250396	0.0767077	0.139072	0.817483	0.200423	0.0225805	0.817483	0.300635	0.0677416
MA0058.3_MAX	CD56dim NK	-0.00544714	0.0045353	-0.00156725	-0.00822948	0.00318221	0.00724147	-0.00613689	0.00312033	-0.00398967	0.0782777	0.139072	0.0602125	0.436422	0.0661139	0.0991708	0.436422	0.0991708
MA0504.1_NR2C2	CD56dim NK	-0.00114281	0.00218386	-0.00255913	-0.00361089	0.00236005	0.00183148	-0.000665578	-0.00289986	-0.00342398	0.0790018	0.139072	0.176462	0.530253	0.028387	0.264693	0.530253	0.0851609
MA0838.1_CEBPG	CD56dim NK	-0.0127758	0.00244718	0.00113336	-0.010502	0.00820729	-0.00907303	-0.00418538	0.000938965	0.00490598	0.0791354	0.139072	0.0805752	0.0328502	1	0.120863	0.0985505	1
MA0861.1_TP73	CD56dim NK	-0.00584966	0.00158092	-0.000724253	-0.00212276	0.000828631	0.00308551	0.00260011	-0.000821691	-0.00282682	0.0794697	0.139072	0.0229142	0.238029	0.258831	0.0687425	0.258831	0.258831
MA0863.1_MTF1	CD56dim NK	-0.00507317	0.0021248	-0.00235477	-0.00608566	0.00107742	0.00421957	0.000778776	-0.00296074	-0.00373683	0.0823246	0.142793	0.0271799	0.407411	0.150115	0.0815397	0.407411	0.225173
MA0819.1_CLOCK	CD56dim NK	-0.00191919	0.00681557	-0.0041003	-0.0117733	0.00506142	0.0103239	-0.0140029	-0.00170136	-0.000297329	0.0834803	0.143528	0.0926813	0.598054	0.0439283	0.139022	0.598054	0.131785
MA0024.3_E2F1	CD56dim NK	-0.00049489	-0.00569126	0.00470745	-0.00810388	-0.00864272	0.000211643	0.00843047	0.0028507	0.00439166	0.0874028	0.148965	0.373378	0.280362	0.0317443	0.373378	0.373378	0.0952328
MA0841.1_NFE2	CD56dim NK	-0.00285688	0.0256696	-0.00976322	-0.00812558	0.0440919	-0.011175	-0.00196304	-0.00430179	-0.021335	0.089976	0.152028	0.0926813	0.900109	0.0439283	0.139022	0.900109	0.131785
MA0752.1_ZNF410	CD56dim NK	-0.00182534	0.00271382	-0.0010718	0.00438868	0.00337276	0.00139592	0.00341801	-0.00381559	-0.000863911	0.0975753	0.16346	0.0443138	0.497879	0.115958	0.132941	0.497879	0.173938
MA0527.1_ZBTB33	CD56dim NK	-0.00244776	-0.00463766	0.00332729	-0.00284301	-0.00379999	-0.00631302	0.00607659	0.00301915	0.00185392	0.0991038	0.164613	0.488718	0.258595	0.0354365	0.488718	0.387893	0.106309
MA0894.1_HESX1	CD56dim NK	-0.0025482	-0.00385202	0.00314582	0.00180243	-0.0036573	-0.00424146	0.00537839	-0.00101543	0.00651223	0.105521	0.173546
MA0771.1_HSF4	CD56dim NK	-0.00426192	-0.000567208	0.00155934	-0.0088488	-0.00247032	0.00323902	0.00437863	0.00193545	-0.000758976	0.106252	0.173546
MA0517.1_STAT1::STAT2	CD56dim NK	-0.00632772	-0.000155603	0.00393076	-0.0122836	0.00150286	-0.00347252	0.00669965	0.00361844	0.00244921	0.107374	0.173928
MA0628.1_POU6F1	CD56dim NK	0.00366646	-0.00723213	0.00621179	-0.00876867	-0.00818742	-0.00532154	0.000815628	0.00436938	0.0119587	0.110349	0.177281
MA0258.2_ESR2	CD56dim NK	-0.00139789	0.00179586	-0.00519745	-0.00278433	-0.000965709	0.007319	-0.00703607	-0.00541608	-0.00371662	0.132249	0.210738
MA0862.1_GMEB2	CD56dim NK	-0.00853606	-0.00480195	0.00355931	-0.00995564	-0.0103661	0.00632637	-0.00183444	0.00236717	0.00854596	0.142333	0.224978
MA0083.3_SRF	CD56dim NK	-0.00576394	0.00594769	-0.00651305	0.000908792	0.00706115	0.00372077	-0.00524106	-0.00914965	-0.00428501	0.14717	0.23003
MA0839.1_CREB3L1	CD56dim NK	0.00248317	0.00227867	-0.00106715	-0.00204089	0.000581642	0.00567272	-0.00268606	-0.00119391	0.000160017	0.147876	0.23003
MA0649.1_HEY2	CD56dim NK	-0.0038426	0.0039562	0.000213325	-0.00813669	0.00251594	0.00683673	-0.00356475	0.00165185	0.00105376	0.149396	0.230563
MA0763.1_ETV3	CD56dim NK	-0.0047923	-0.00602172	0.00240987	-0.00839199	-0.00973321	0.00140125	0.00483439	0.00296535	0.000145461	0.157458	0.239417
MA0903.1_HOXB3	CD56dim NK	0.00239564	-0.00285455	0.00499926	-0.00439803	-0.00288847	-0.0027867	0.00851475	0.00262623	0.00542414	0.157575	0.239417
MA0091.1_TAL1::TCF3	CD56dim NK	-0.00227391	-0.00477685	0.00113839	-0.000733435	-0.00709101	-0.000148539	-0.00280915	0.0017123	0.00310053	0.161396	0.243335
MA0685.1_SP4	CD56dim NK	-0.0012427	0.000154593	0.00330897	-0.00119427	0.00185799	-0.00325221	0.00389644	0.000421796	0.00628569	0.171996	0.257337
MA0719.1_RHOXF1	CD56dim NK	-0.00886464	-0.00151101	0.00472612	-0.0116789	-0.00385544	0.00317784	0.0141346	0.000887176	0.00293254	0.179874	0.267086
MA0855.1_RXRB	CD56dim NK	-0.0029445	0.000635416	0.000659629	-0.00538891	-0.000326784	0.00255982	-0.000708206	-0.00051156	0.0029379	0.185685	0.273641
MA0823.1_HEY1	CD56dim NK	-0.00338229	0.00294522	-0.00138682	-0.00157808	0.00149961	0.00583644	-0.0060383	0.00116571	-0.0012638	0.194061	0.283851
MA0795.1_SMAD3	CD56dim NK	-0.00821135	0.00826167	-0.00866171	0.00716007	0.00440029	0.0159844	-0.00993543	-0.00853566	-0.00795961	0.199338	0.289409
MA0599.1_KLF5	CD56dim NK	-0.00104567	0.00137598	1.86491e-05	-0.00146516	0.00234036	-0.000552764	0.00122055	-0.000509	-0.00016703	0.202676	0.292092
MA0032.2_FOXC1	CD56dim NK	-0.00198463	-0.00447394	0.00146671	0.000835721	-0.00678097	0.000140123	-0.00183733	0.00183853	0.00323561	0.212046	0.303364
MA0636.1_BHLHE41	CD56dim NK	-0.00361277	-0.00357557	0.00181702	-0.0075408	-0.00555116	0.000375601	0.00219745	0.00182212	0.00155743	0.231287	0.328495
MA0733.1_EGR4	CD56dim NK	0.00169281	0.00152734	-0.00107206	0.000430437	0.00262332	-0.000664601	0.00122152	-0.00326756	-3.96892e-05	0.235159	0.331137
MA0098.3_ETS1	CD56dim NK	-0.00392042	-0.00658548	0.00091742	-0.00499185	-0.0110596	0.00236276	0.00466142	0.00180969	-0.00261956	0.236526	0.331137
MA0642.1_EN2	CD56dim NK	-0.00283441	-0.00453263	0.00210923	-0.0003135	-0.00965699	0.0057161	0.000940032	0.00218175	0.00280409	0.254238	0.353409
MA0670.1_NFIA	CD56dim NK	-0.00574726	-0.00205821	-0.00341423	-0.00202242	-0.00416022	0.00214583	-0.00212353	5.99309e-05	-0.00832789	0.303482	0.418891
MA0163.1_PLAG1	CD56dim NK	-0.00363578	0.00123791	-0.000195307	-0.00484725	0.00101372	0.0016863	0.000751855	-0.000315636	-0.000686363	0.306895	0.42064
MA0637.1_CENPB	CD56dim NK	-0.00508883	0.00054421	0.00461524	-0.00506958	-0.000258616	0.00214986	0.00392546	0.00539093	0.00417012	0.310146	0.422143
MA0048.2_NHLH1	CD56dim NK	-4.17394e-05	0.000537992	-0.00385037	-0.00129489	-0.00145237	0.00451871	-0.00171658	-0.00258809	-0.00674556	0.32386	0.43777
MA0074.1_RXRA::VDR	CD56dim NK	-0.00151811	0.0011339	-0.00307034	-0.000936254	0.000609562	0.00218256	-0.00327519	-0.00156243	-0.004693	0.339921	0.456332
MA0475.2_FLI1	CD56dim NK	-0.00468395	-0.0054137	0.000934012	-0.00616571	-0.00967606	0.00311101	0.00509821	0.00177807	-0.00282685	0.349039	0.465385
MA0725.1_VSX1	CD56dim NK	0.000269625	-0.00266976	0.00153964	-0.000937048	-0.00437762	0.000745949	-0.000217804	0.00276099	0.00128636	0.353042	0.467542
MA0647.1_GRHL1	CD56dim NK	-0.00569192	-0.00149225	-0.00270636	-0.00810323	-0.00486651	0.00525627	-0.00100811	-0.000585361	-0.00631304	0.358219	0.471215
MA0793.1_POU6F2	CD56dim NK	0.00314645	-0.00110293	0.000868332	-0.00102757	-0.000435762	-0.00243726	-0.00154096	0.00051497	0.00288679	0.361243	0.472024
MA0663.1_MLX	CD56dim NK	-0.0033146	-0.0032433	0.000567999	-0.00733001	-0.00411356	-0.00150279	-9.96646e-05	0.000566143	0.00101527	0.366748	0.476044
MA0259.1_ARNT::HIF1A	CD56dim NK	-0.00443583	-0.00456583	0.000634879	-0.00149326	-0.0103093	0.00692116	-0.00235947	0.00447897	-0.00185366	0.378037	0.487468
MA0770.1_HSF2	CD56dim NK	-0.00323613	-0.00200739	0.00120634	-0.00828493	-0.00519948	0.00437677	0.000633378	0.00214049	0.000498456	0.380703	0.487698
MA0498.2_MEIS1	CD56dim NK	-0.00142091	0.000862283	-0.00181822	0.000682243	0.000694954	0.00119694	-0.0033733	-0.00134059	-0.00133872	0.391499	0.498272
MA0749.1_ZBED1	CD56dim NK	-0.00756383	-0.00658699	0.00103154	-0.0156437	-0.0113334	0.00290592	0.0136574	0.000686944	-0.0069837	0.396512	0.501396
MA0152.1_NFATC2	CD56dim NK	0.000461511	-0.00257992	0.00231597	-0.0074915	-0.00257052	-0.00259871	-0.00171967	0.00230388	0.0050205	0.424297	0.53309
MA0106.3_TP53	CD56dim NK	-0.00570457	0.0012341	-0.000344685	-0.00760038	-0.00296504	0.00963238	0.0053705	0.00115498	-0.00590442	0.446859	0.557862
MA0076.2_ELK4	CD56dim NK	-0.00272811	-0.00445116	-0.000116695	-0.00632845	-0.00797279	0.0025921	0.00261246	0.00174236	-0.00410503	0.457117	0.567056
MA0027.2_EN1	CD56dim NK	0.00220989	-0.00185369	0.00327256	0.00651167	-0.004684	0.00380693	2.34757e-05	0.00100721	0.00808153	0.46196	0.56946
MA0865.1_E2F8	CD56dim NK	-0.00186953	-0.00139798	0.00135652	-0.0086465	-0.00349913	0.00280431	0.00265033	-0.000815724	0.00302827	0.468964	0.571861
MA0464.2_BHLHE40	CD56dim NK	-0.0039126	-0.00159882	0.000728856	-0.00974813	-0.0037558	0.00271515	0.00106724	0.000883563	0.000322774	0.469743	0.571861
MA0844.1_XBP1	CD56dim NK	-0.000763215	0.00127857	-0.00312742	-0.000221641	-0.001649	0.0071337	-0.00241	0.000372037	-0.00768839	0.473442	0.572806
MA0741.1_KLF16	CD56dim NK	-0.000563333	0.00158668	0.000703458	-0.000403317	0.00306656	-0.00137307	0.00266803	-0.000810754	0.00116032	0.483764	0.581704
MA0777.1_MYBL2	CD56dim NK	-0.00169058	-0.00185287	-0.00705163	-0.00559749	-0.00220746	-0.00114368	0.00194455	-0.00776448	-0.0122174	0.508897	0.608194
MA0638.1_CREB3	CD56dim NK	-6.33055e-05	-0.00375913	0.000126082	-0.00330635	-0.0066218	0.00196621	-0.000666745	0.000235255	0.000527266	0.535528	0.636142
MA0875.1_BARX1	CD56dim NK	7.64193e-05	-0.000824912	0.00171281	-0.00530421	-0.00416308	0.00585143	0.0035335	0.00030645	0.00213977	0.553129	0.653092
MA0692.1_TFEB	CD56dim NK	-0.000178542	-0.00132339	0.00113389	-0.00575956	-0.00112352	-0.00172311	0.000732613	0.00108896	0.00145383	0.559284	0.656406
MA0808.1_TEAD3	CD56dim NK	0.00162515	-0.00316136	0.00131278	0.00444107	-0.00511333	0.000742574	-0.00131238	0.00179567	0.00249952	0.581423	0.677892
MA0646.1_GCM1	CD56dim NK	-0.00128371	-0.00384053	-0.00129829	-0.00252659	-0.0071768	0.00283201	-0.00257214	-0.00281259	0.00131762	0.584509	0.677892
MA0479.1_FOXH1	CD56dim NK	0.000850521	-0.00144127	-0.000517715	0.0036338	-0.00263783	0.000951843	-0.0043362	0.00153419	-0.000365947	0.607201	0.700067
MA0762.1_ETV2	CD56dim NK	-0.00295972	-0.00541783	-0.00208558	-0.00171194	-0.00927492	0.00229635	0.000187297	0.000286789	-0.0063686	0.628055	0.719875
MA0138.2_REST	CD56dim NK	-0.0008317	-0.000649631	-0.00224234	-0.00267578	-0.00230272	0.00265655	-0.00122273	-0.0020451	-0.00315221	0.634833	0.723415
MA0768.1_LEF1	CD56dim NK	-0.00221103	-0.00392145	-0.00442313	0.00707334	-0.00476279	-0.00223876	-0.00849373	-0.00516797	-0.000840412	0.651007	0.735243
MA0031.1_FOXD1	CD56dim NK	-0.00222415	-0.00547354	-0.000741898	0.00450808	-0.00793723	-0.000546151	-0.00328393	0.00290542	-0.00330242	0.656467	0.735243
MA0157.2_FOXO3	CD56dim NK	-0.00222415	-0.00547354	-0.000741898	0.00450808	-0.00793723	-0.000546151	-0.00328393	0.00290542	-0.00330242	0.656467	0.735243
MA0826.1_OLIG1	CD56dim NK	0.00104917	-0.00383622	-0.00187019	-0.0152566	-0.0048249	-0.00185887	0.00181053	0.000776648	-0.00741198	0.663092	0.738444
MA0600.2_RFX2	CD56dim NK	-0.00437378	-0.0030637	-0.00921376	0.0108185	-0.00490308	0.000615057	-0.00182316	-0.0101619	-0.0130347	0.670859	0.741181
MA0472.2_EGR2	CD56dim NK	0.000239211	-0.0010561	0.000100354	3.06149e-05	-0.000776417	-0.00161547	0.00144243	-0.00113975	0.000652427	0.673114	0.741181
MA0130.1_ZNF354C	CD56dim NK	-0.000524445	-0.000859062	-0.000296227	-0.00212488	-0.00201137	0.00144556	-0.00245316	0.00108659	-0.000471563	0.688205	0.753565
MA0834.1_ATF7	CD56dim NK	-0.00406121	-0.00121061	0.00060442	-0.00805901	-0.0028756	0.00211936	0.00186393	0.00256783	-0.0025259	0.706396	0.76419
MA0510.2_RFX5	CD56dim NK	-0.00407637	-0.00366813	-0.00900996	0.00928597	-0.00586038	0.000716383	-0.00231925	-0.0101536	-0.0121362	0.711303	0.76419
MA0668.1_NEUROD2	CD56dim NK	-0.002483	-0.00584227	-0.0022092	-0.00351635	-0.0110389	0.00455096	-0.00379174	-0.00407897	0.00102723	0.712415	0.76419
MA0799.1_RFX4	CD56dim NK	-0.00465477	-0.00269555	-0.00820087	0.0105205	-0.00409244	9.8235e-05	-0.00116891	-0.00886859	-0.0121098	0.713504	0.76419
MA0760.1_ERF	CD56dim NK	-0.00294233	-0.00502019	-0.00120729	-0.00269336	-0.00900097	0.00294136	0.00305743	-0.000475713	-0.00490393	0.726379	0.773752
MA0593.1_FOXP2	CD56dim NK	-0.001187	-0.00486191	-0.000900393	0.00187547	-0.00559517	-0.00339538	-0.0024365	0.000731571	-0.00178028	0.740497	0.784527
MA0625.1_NFATC3	CD56dim NK	-0.00147858	-0.000849279	0.000795739	-0.0091523	-0.00119719	-0.000153456	-0.00480192	-0.000673855	0.00624204	0.746446	0.786577
MA0895.1_HMBOX1	CD56dim NK	-0.00376499	-0.000546722	-0.000183295	-0.00960498	-0.00248848	0.0033368	0.00180746	-0.000397453	-0.00126061	0.759707	0.79627
MA0042.2_FOXI1	CD56dim NK	-0.000753035	-0.0042338	-0.00147283	0.00298276	-0.00563446	-0.00143249	-0.0044327	0.00149983	-0.00296769	0.819741	0.8412
MA0848.1_FOXO4	CD56dim NK	-0.000753035	-0.0042338	-0.00147283	0.00298276	-0.00563446	-0.00143249	-0.0044327	0.00149983	-0.00296769	0.819741	0.8412
MA0849.1_FOXO6	CD56dim NK	-0.000753035	-0.0042338	-0.00147283	0.00298276	-0.00563446	-0.00143249	-0.0044327	0.00149983	-0.00296769	0.819741	0.8412
MA0850.1_FOXP3	CD56dim NK	-0.000753035	-0.0042338	-0.00147283	0.00298276	-0.00563446	-0.00143249	-0.0044327	0.00149983	-0.00296769	0.819741	0.8412
MA0732.1_EGR3	CD56dim NK	0.00112446	0.00018797	0.000522524	0.00010938	0.00113397	-0.00170404	0.00112913	-0.000843507	0.00171182	0.862667	0.880639
MA0523.1_TCF7L2	CD56dim NK	-0.00486243	-0.00506994	-0.0065143	0.00342217	-0.00619407	-0.00282168	-0.00834599	-0.00749147	-0.00415315	0.87591	0.889525
MA0088.2_ZNF143	CD56dim NK	0.000612419	7.30243e-05	0.00195455	-0.00300748	0.00149982	-0.00278056	0.00180902	0.00271164	0.0011683	0.887319	0.896466
MA0678.1_OLIG2	CD56dim NK	-0.00104981	-0.000855053	-0.00323779	-0.0135317	-0.00267013	0.00277509	-0.00286566	-0.00514948	-0.00125555	0.910649	0.915319
MA0645.1_ETV6	CD56dim NK	-0.00152906	-0.00390851	-0.00242941	-0.00277715	-0.00776071	0.00379591	0.00133018	-0.000970021	-0.00663843	0.952209	0.952209
MA0801.1_MGA	CD8+ γδ T	0.0222413	0.0161048	-0.0257439	0.0136387	0.0327405	-0.0282572	-0.0307913	-0.0173552	-0.0321658	0.00110029	0.128064	0.503515	0.000330691	0.0211678	0.503515	0.000992074	0.0317517
MA0758.1_E2F7	CD8+ γδ T	-0.0126682	-0.00723332	0.014081	-0.00611565	-0.00692335	-0.00805992	0.00458399	0.00834213	0.0271077	0.00294066	0.128064	0.341786	0.00331122	0.0110795	0.341786	0.00993366	0.0166193
MA0690.1_TBX21	CD8+ γδ T	0.0328715	0.0127471	-0.0233835	0.0145994	0.0278782	-0.0276026	-0.0179371	-0.0152801	-0.0364683	0.00397437	0.128064	0.275063	0.00120151	0.0598883	0.275063	0.00360452	0.0898324
MA0800.1_EOMES	CD8+ γδ T	0.0395834	0.0149728	-0.0243638	0.0192203	0.0339664	-0.0356768	-0.0121393	-0.0201579	-0.0374204	0.00454492	0.128064	0.307226	0.0010064	0.0817723	0.307226	0.0030192	0.122658
MA0805.1_TBX1	CD8+ γδ T	0.0187337	0.0168375	-0.0264566	0.0111765	0.0386982	-0.0414576	-0.0226821	-0.0187031	-0.0380188	0.00482987	0.128064	0.860259	0.000840983	0.0537736	0.860259	0.00252295	0.0806605
MA0511.2_RUNX2	CD8+ γδ T	0.00361119	0.0123766	-0.0199922	-0.00978334	0.0145409	0.00660527	-0.0215809	-0.0194343	-0.0195839	0.00530336	0.128064	0.503515	0.0195566	0.00411169	0.503515	0.0293348	0.0123351
MA0838.1_CEBPG	CD8+ γδ T	-0.0229083	-0.00989874	0.00770772	-0.000576347	-0.00914414	-0.011911	0.0145172	0.0202323	-0.011444	0.00556799	0.128064	0.549472	0.00621106	0.0126619	0.549472	0.0186332	0.0189928
MA0792.1_POU5F1B	CD8+ γδ T	0.00241312	-0.0105124	0.00420934	-0.00250429	-0.0129746	-0.00394647	-0.000170628	0.0143105	-0.00465534	0.0147644	0.297134	0.0447593	0.782431	0.00476623	0.0671389	0.782431	0.0142987
MA0754.1_CUX1	CD8+ γδ T	-0.00560929	-0.035407	0.0137906	-0.0108296	-0.0425901	-0.016252	0.0135533	0.0443078	-0.0216546	0.0215227	0.33406	0.245278	0.138557	0.00843206	0.245278	0.207836	0.0252962
MA0802.1_TBR1	CD8+ γδ T	0.033217	0.0213296	-0.0228007	0.0211747	0.0405871	-0.0300239	-0.016626	-0.0159009	-0.0349669	0.0220343	0.33406	0.503515	0.00532584	0.132249	0.503515	0.0159775	0.198373
MA0786.1_POU3F1	CD8+ γδ T	-0.00779842	-0.00152352	0.00714051	0.00018738	-0.00709785	0.0133414	-0.000861793	0.0115882	0.00728637	0.022824	0.33406	0.341786	0.00722664	0.132249	0.341786	0.0216799	0.198373
MA0159.1_RARA::RXRA	CD8+ γδ T	0.00629605	0.00339068	-0.00698303	0.00435823	0.00252308	0.00570429	-0.00337824	-0.00336986	-0.0136016	0.0249219	0.334369	0.698535	0.0170811	0.0431003	0.698535	0.0512432	0.0646505
MA0657.1_KLF13	CD8+ γδ T	-0.00250671	-0.00757772	0.00276945	-0.00334234	-0.0064516	-0.0105807	0.0017064	0.00379111	0.00228622	0.0316563	0.383238	0.459672	0.0832321	0.0164372	0.459672	0.124848	0.0493117
MA0660.1_MEF2B	CD8+ γδ T	-0.0101506	0.0118663	-0.0020545	-0.00204264	0.0101212	0.01652	0.00807038	0.00303513	-0.0147423	0.0351736	0.383238	0.0183243	0.167351	0.0996787	0.0549729	0.167351	0.149518
MA0717.1_RAX2	CD8+ γδ T	0.00022141	-0.00588575	0.0103891	-0.0088644	-0.0112217	0.00834358	0.00608206	0.0184942	0.00380466	0.0362627	0.383238	0.341786	0.125672	0.0164372	0.341786	0.188508	0.0493117
MA0691.1_TFAP4	CD8+ γδ T	0.0107495	0.0104668	-0.00640939	0.00931754	0.0108089	0.00955464	-0.0134436	-0.00901905	0.0013247	0.0394674	0.383238	0.971913	0.0532274	0.0270429	0.971913	0.0798411	0.0798411
MA0115.1_NR1H2::RXRA	CD8+ γδ T	0.00648693	-0.0118712	0.00250598	-0.00966369	-0.0203427	0.0107194	0.00649885	0.00685551	-0.00523038	0.0410875	0.383238	0.0183243	0.821245	0.0384733	0.0549729	0.821245	0.0577099
MA0130.1_ZNF354C	CD8+ γδ T	-0.00804547	0.00221278	0.00310699	-0.00662077	-0.000815689	0.0102887	0.00331621	0.00063262	0.00585426	0.0448426	0.383238	0.113102	0.0112259	0.777758	0.169653	0.0336777	0.777758
MA0822.1_HES7	CD8+ γδ T	-0.0151678	-1.69328e-05	-0.00244162	-1.7422e-05	-0.000141053	0.000314055	-0.000147664	0.0037726	-0.0112208	0.0484313	0.383238	0.0377713	0.0289535	0.777758	0.056657	0.056657	0.777758
MA0595.1_SREBF1	CD8+ γδ T	0.00576992	0.00440428	-0.0130119	-0.000232367	0.00815993	-0.00561079	-0.0118061	-0.0109213	-0.0162548	0.0526674	0.383238	0.915878	0.042003	0.0537736	0.915878	0.0806605	0.0806605
MA0785.1_POU2F1	CD8+ γδ T	-0.00381215	-0.000287395	0.00742239	-0.00357976	-0.00117817	0.00208799	0.00121792	0.016224	0.00129012	0.0549742	0.383238	0.503515	0.0328502	0.0903691	0.503515	0.0985505	0.135554
MA0662.1_MIXL1	CD8+ γδ T	-0.000863061	-0.00852	0.0180934	-0.00655937	-0.00459246	-0.0189934	0.0115258	0.0264976	0.0126669	0.0554925	0.383238	0.307226	0.258595	0.0186718	0.307226	0.307226	0.0560155
MA0737.1_GLIS3	CD8+ γδ T	-0.000200986	0.00455781	-0.00843486	-0.00562047	0.00832272	-0.00548196	-0.0146939	-0.00382862	-0.00963611	0.0570074	0.383238	0.341786	0.11374	0.0342754	0.341786	0.17061	0.102826
MA0741.1_KLF16	CD8+ γδ T	-0.00269483	-0.00331459	0.00141141	-0.00225269	-0.00220688	-0.00626849	0.000543833	0.00162227	0.00174379	0.0571286	0.383238	0.915878	0.042003	0.0598883	0.915878	0.0898324	0.0898324
MA0513.1_SMAD2::SMAD3::SMAD4	CD8+ γδ T	-0.00850978	0.00926648	-0.00871508	0.0121592	0.0166851	-0.0105164	-0.00876581	-0.0094616	-0.00781032	0.0624666	0.386217	0.0844846	0.74415	0.0270429	0.126727	0.74415	0.0811287
MA0647.1_GRHL1	CD8+ γδ T	-0.010415	0.00082065	0.00896528	-0.0130695	0.00790815	-0.0180793	-0.000354223	0.0110424	0.012755	0.064063	0.386217	0.245278	0.0195566	0.346803	0.346803	0.0586697	0.346803
MA0095.2_YY1	CD8+ γδ T	-0.0104951	-0.00886409	0.00492129	-0.0077893	-0.0129317	0.00198297	0.0125855	0.0132492	-0.00990408	0.0647692	0.386217	0.915878	0.0473361	0.0665687	0.915878	0.0998531	0.0998531
MA0639.1_DBP	CD8+ γδ T	-0.0250241	-0.0102545	0.00961825	-0.00852758	-0.0118688	-0.00594944	0.0274013	0.00647953	0.00142475	0.0682681	0.392542	0.341786	0.0254614	0.221311	0.341786	0.0763843	0.331966
MA0472.2_EGR2	CD8+ γδ T	0.000252946	-0.00531328	-0.000267871	0.00326592	-0.00476918	-0.00676422	-0.00390772	0.000431497	0.00134276	0.0783997	0.426719	0.031734	0.900109	0.0738512	0.095202	0.900109	0.110777
MA0899.1_HOXA10	CD8+ γδ T	-0.00311002	-0.000964559	0.0134821	-0.0107687	-0.000482006	-0.00225137	0.0135476	0.0156296	0.0109332	0.0795129	0.426719	0.915878	0.0597191	0.0738512	0.915878	0.110777	0.110777
MA0768.1_LEF1	CD8+ γδ T	0.0191965	-0.00819716	-0.00619297	-0.00481362	-0.0105436	-0.00193996	-0.0061815	-0.0168914	0.00628093	0.0873402	0.453606	0.0447593	0.0668543	0.814052	0.100282	0.100282	0.814052
MA0844.1_XBP1	CD8+ γδ T	0.00766311	-0.00691702	-0.00552353	0.000502199	-0.00874884	-0.00203216	-0.00445008	-0.00904453	-0.00213132	0.0951432	0.457574	0.0844846	0.0746771	0.323227	0.126727	0.126727	0.323227
MA0144.2_STAT3	CD8+ γδ T	-0.0114348	0.000433038	-0.00223396	-0.00860863	0.00152028	-0.00246628	0.00668054	0.00496436	-0.016575	0.09529	0.457574	0.0377713	0.0832321	0.925045	0.113314	0.124848	0.925045
MA0638.1_CREB3	CD8+ γδ T	0.00766914	-0.00538592	-0.00235504	-0.00295498	-0.00546975	-0.00516235	-0.00736763	0.00923133	-0.0125307	0.0968849	0.457574	0.0377713	0.11374	0.540852	0.113314	0.17061	0.540852
MA0139.1_CTCF	CD8+ γδ T	-0.00763458	-0.010425	0.0179292	-0.00524055	-0.0190479	0.0125694	0.0167118	0.0103392	0.0275958	0.10363	0.457574
MA0501.1_MAF::NFE2	CD8+ γδ T	0.0094243	0.00708024	-0.00930089	0.00606916	0.00737355	0.00629811	-0.00278181	-0.00837729	-0.0147245	0.10393	0.457574
MA0895.1_HMBOX1	CD8+ γδ T	-0.0171891	-0.000259424	0.00643999	-0.00801534	0.000596873	-0.00254289	-0.00017105	6.31214e-05	0.018287	0.106209	0.457574
MA0699.1_LBX2	CD8+ γδ T	-0.00178141	-0.0137171	0.00521217	-0.00345995	-0.0157733	-0.00823379	0.00643023	0.0120864	-0.00361985	0.107999	0.457574
MA0152.1_NFATC2	CD8+ γδ T	-0.00795165	-0.0109638	-0.000713933	-0.00547843	-0.0100952	-0.0132802	0.00888896	-0.00580533	-0.0011759	0.11184	0.461697
MA0478.1_FOSL2	CD8+ γδ T	0.000466388	-0.00420889	-0.0259104	0.0174851	-0.00657918	0.00211186	-0.0182213	-0.0119929	-0.0472735	0.124992	0.493544
MA0476.1_FOS	CD8+ γδ T	0.00133584	-0.00816021	-0.025235	0.0146142	-0.0100824	-0.00303442	-0.00752001	-0.0133147	-0.0509521	0.126571	0.493544
MA0843.1_TEF	CD8+ γδ T	-0.0192359	0.00705572	0.00462359	-0.000444743	0.00508316	0.0123159	0.0151708	0.0144257	-0.0138436	0.129422	0.493544
MA0862.1_GMEB2	CD8+ γδ T	-0.019471	0.00635945	-0.000553887	-0.0134839	0.00447033	0.0113971	-0.000952787	0.0111505	-0.0139431	0.131816	0.493544
MA0506.1_NRF1	CD8+ γδ T	-0.00680076	-0.00321011	0.00673542	-0.0117164	-0.00707422	0.00709418	0.00474254	0.0104923	0.003681	0.13536	0.495293
MA0841.1_NFE2	CD8+ γδ T	-0.00452553	0.000850148	-0.0231956	0.00857611	-0.00536639	0.0174276	-0.0188605	-0.00424919	-0.0481897	0.142109	0.498766
MA0648.1_GSC	CD8+ γδ T	-0.0159204	-0.00577342	0.00429347	-0.00103723	-0.00973939	0.00480252	0.0161023	0.000671754	0.000646271	0.145961	0.498766
MA0597.1_THAP1	CD8+ γδ T	-0.00613057	0.00288373	-0.00790051	0.00522117	0.00279689	0.00311532	-0.00821252	-0.00632216	-0.00953391	0.149608	0.498766
MA0028.2_ELK1	CD8+ γδ T	-0.00853769	-0.00447039	0.000745689	-0.0139203	-0.00797228	0.00486796	0.00794288	0.00390372	-0.00773681	0.15017	0.498766
MA0107.1_RELA	CD8+ γδ T	0.0067138	0.000489283	-0.0184621	0.013736	0.000896445	-0.000596482	-0.0112071	-0.00564551	-0.0382515	0.151974	0.498766
MA0101.1_REL	CD8+ γδ T	0.00402228	0.00781891	-0.0171607	0.0139237	0.00901208	0.00463713	-0.00832378	-0.0100551	-0.0313418	0.156836	0.498766
MA0655.1_JDP2	CD8+ γδ T	-0.00929646	-0.00591764	-0.0286855	0.012481	-0.0017087	-0.0171415	-0.0316572	-0.00768133	-0.0512093	0.157994	0.498766
MA0157.2_FOXO3	CD8+ γδ T	-0.00339766	-0.0104897	0.00277187	-0.00860836	-0.0147837	0.000961096	0.00171697	0.00613634	-0.000450073	0.162913	0.504404
MA0670.1_NFIA	CD8+ γδ T	0.00176231	0.0116398	-0.00638683	-0.00663596	0.0146125	0.00371275	0.0037397	-0.000175056	-0.0203849	0.168713	0.512507
MA0724.1_VENTX	CD8+ γδ T	0.00225916	-0.0170294	0.0178162	-0.0121719	-0.026482	0.00817744	0.0153036	0.0384274	-0.00455501	0.179778	0.53444
MA0523.1_TCF7L2	CD8+ γδ T	0.00785994	-0.0110459	-0.000318177	-0.00850598	-0.0137013	-0.00396472	-0.00495322	-0.0125604	0.0170544	0.182573	0.53444
MA0024.3_E2F1	CD8+ γδ T	0.000590191	-0.0143468	0.00332434	-0.016115	-0.0209204	0.00318298	0.0118229	-0.00614281	0.0087036	0.189295	0.544222
MA0727.1_NR3C2	CD8+ γδ T	-0.0211677	0.000586585	-0.00914517	-0.0195068	-0.00637337	0.0191465	-0.0105911	-0.00755877	-0.010032	0.199357	0.563097
MA0137.3_STAT1	CD8+ γδ T	-0.0113761	-0.00307926	-0.00542865	-0.00299746	-0.00313719	-0.00292478	0.00496785	0.000363439	-0.0191171	0.203224	0.564122
MA0106.3_TP53	CD8+ γδ T	-0.00644014	-0.000670043	0.00325864	-0.00461547	-0.00426308	0.00891138	0.000894693	0.00865848	-0.0014652	0.213592	0.573047
MA0685.1_SP4	CD8+ γδ T	-0.00203182	-0.00352068	0.00162055	-0.00306194	-0.00315096	-0.00450661	9.20898e-05	0.00161963	0.00264058	0.213679	0.573047
MA0073.1_RREB1	CD8+ γδ T	0.000778484	0.00589573	-0.000915861	-0.000391899	0.00717359	0.0024881	-0.00287248	0.000329673	-0.00106457	0.217117	0.573047
MA0504.1_NR2C2	CD8+ γδ T	0.00335033	0.00161015	-0.000206603	-0.00134059	0.00176776	0.00118987	0.00217181	-0.00206289	0.000373454	0.223426	0.578094
MA0138.2_REST	CD8+ γδ T	0.00560723	0.00458774	-0.000606843	-0.000376629	0.00307127	0.00863165	0.00234777	-0.000888471	-0.00224802	0.226211	0.578094
MA0507.1_POU2F2	CD8+ γδ T	0.00367122	-0.00631814	0.0055388	-0.00118962	-0.00895249	0.000706808	0.00461249	0.010153	0.00077314	0.237501	0.597464
MA0837.1_CEBPE	CD8+ γδ T	-0.00806136	-0.0145619	0.00463723	0.0143537	-0.00914357	-0.0290108	0.00596543	0.027297	-0.0226846	0.244589	0.603986
MA0131.2_HINFP	CD8+ γδ T	-0.00334424	0.00258611	-0.000401446	-0.00721039	0.000842554	0.00723559	0.00312089	-0.00437796	0.0018896	0.247597	0.603986
MA0071.1_RORA	CD8+ γδ T	-0.00531598	-0.0129044	-0.00161096	-0.00837307	-0.0156575	-0.00556307	-0.00410717	0.00750142	-0.0105779	0.256228	0.608005
MA0464.2_BHLHE40	CD8+ γδ T	-0.0113294	-0.00354088	0.000808991	-0.00316348	-0.00800661	0.00836774	0.0162615	-0.00282649	-0.0052513	0.256797	0.608005
MA0671.1_NFIX	CD8+ γδ T	-0.00130734	0.00486396	-0.0094094	-0.00122429	0.00462911	0.00549024	-0.00242353	-0.00142409	-0.0233828	0.261336	0.609783
MA0088.2_ZNF143	CD8+ γδ T	-0.00142168	-0.000815098	0.00901741	-0.00179178	0.0012448	-0.00630816	0.0125156	0.0113194	0.00399966	0.267386	0.614987
MA0804.1_TBX19	CD8+ γδ T	0.0235652	0.00489562	0.00456906	-0.00627251	0.0195717	-0.0342405	-0.00330734	0.00172195	0.0131416	0.272393	0.617679
MA0666.1_MSX1	CD8+ γδ T	0.0020011	-0.00321294	0.00807072	-0.0114711	0.000134214	-0.0121387	0.0111341	0.0071999	0.00704444	0.281101	0.628572
MA0778.1_NFKB2	CD8+ γδ T	0.00382723	0.00364136	-0.0149956	0.00449689	0.00751895	-0.00669885	-0.0113418	-0.00858983	-0.0249049	0.290792	0.636915
MA0636.1_BHLHE41	CD8+ γδ T	-0.00985105	0.000828474	-0.00584825	-0.00386608	-0.00145397	0.006915	0.00978957	-0.00706016	-0.0148596	0.294314	0.636915
MA0032.2_FOXC1	CD8+ γδ T	0.00263958	-0.00495747	0.000566698	-0.00173428	-0.0112557	0.0118379	0.00538595	0.00551703	-0.00842152	0.296699	0.636915
MA0113.3_NR3C1	CD8+ γδ T	-0.0182099	0.00217292	-0.00859519	-0.0105897	-0.00133914	0.0115384	-0.00948742	-0.0106303	-0.00562605	0.303324	0.642569
MA0894.1_HESX1	CD8+ γδ T	-0.00036709	-0.00693547	0.00880973	-0.0114949	-0.0050205	-0.0120421	-0.00569228	0.016671	0.0093063	0.307874	0.643646
MA0596.1_SREBF2	CD8+ γδ T	0.000952284	-0.00127007	-0.00621063	0.00164812	0.000648592	-0.0063865	-0.00780996	0.00145609	-0.0140889	0.31447	0.643646
MA0649.1_HEY2	CD8+ γδ T	-0.0143887	-0.0134561	-0.00493224	0.000408339	-0.0168945	-0.00428709	0.0076635	0.000524852	-0.019696	0.315826	0.643646
MA0527.1_ZBTB33	CD8+ γδ T	0.000153024	-0.000925899	0.00605212	0.00072976	-0.00142613	0.000408041	0.00312315	0.00909904	0.00445002	0.326704	0.657491
MA0774.1_MEIS2	CD8+ γδ T	0.0008006	-0.00583835	0.00535482	-0.00805403	-0.00257917	-0.0145295	-0.000736967	-0.00233224	0.0183842	0.334554	0.664947
MA0790.1_POU4F1	CD8+ γδ T	0.0015308	-0.00873166	0.00170942	-0.00438691	-0.0170332	0.0134056	-0.000848401	0.00594435	-0.00152614	0.338993	0.664947
MA0668.1_NEUROD2	CD8+ γδ T	-0.00223292	-0.00429084	0.00744518	0.00263725	-0.0190607	0.0350956	0.00965648	0.00554443	0.00818852	0.344728	0.664947
MA0058.3_MAX	CD8+ γδ T	-0.00949341	-0.00252448	-0.000290967	-0.00531593	-9.90851e-05	-0.0089922	0.00733991	0.00335201	-0.00962836	0.346929	0.664947
MA0634.1_ALX3	CD8+ γδ T	-0.00350881	0.000569879	0.00103748	-0.00637155	0.00236866	-0.00422686	0.000115308	0.00194525	0.000593192	0.353232	0.669063
MA0886.1_EMX2	CD8+ γδ T	-0.00801404	-0.00211131	0.0224469	-0.0309173	-0.0108767	0.0212632	0.0109205	0.0563465	-0.00941829	0.362613	0.678845
MA0046.2_HNF1A	CD8+ γδ T	0.000240882	-0.0210048	-0.000178662	-0.00302095	-0.0334488	0.0121791	-0.00349401	0.0139469	-0.0144482	0.371382	0.681547
MA0825.1_MNT	CD8+ γδ T	-0.0100977	-0.00421053	0.00145742	-0.0076187	-0.0022701	-0.00938503	0.0113916	0.00594768	-0.010404	0.372522	0.681547
MA0738.1_HIC2	CD8+ γδ T	0.00580233	-0.00124151	0.0004757	-0.00114473	-0.00115441	-0.00147378	-0.00912221	-0.0023138	0.0101287	0.379145	0.685869
MA0160.1_NR4A2	CD8+ γδ T	0.00508879	0.000832758	-0.00196696	-0.0077786	0.00210997	-0.00257313	-0.00317171	0.00606622	-0.0105358	0.401176	0.715561
MA0083.3_SRF	CD8+ γδ T	0.00012589	-0.00228875	-0.0100243	0.00148875	-0.00607009	0.00779482	-0.00743487	-0.0133599	-0.00785891	0.406362	0.715561
MA0488.1_JUN	CD8+ γδ T	0.000844597	0.00339085	-0.00425775	0.00598466	0.00152138	0.0083761	-0.00268691	-0.000391304	-0.00981583	0.408892	0.715561
MA0517.1_STAT1::STAT2	CD8+ γδ T	-0.0012487	-0.00126103	0.00542519	-0.0117791	0.0036822	-0.014443	0.00315871	0.00184866	0.0111088	0.427705	0.732411
MA0826.1_OLIG1	CD8+ γδ T	0.00466087	-0.00898411	0.00853949	0.00942493	-0.00496532	-0.0197009	0.0137144	0.00212986	0.0125674	0.429282	0.732411
MA0863.1_MTF1	CD8+ γδ T	-0.00410553	-0.00834433	-0.00471542	-0.00807027	-0.00630652	-0.0137785	0.00532099	0.00418369	-0.0217887	0.435306	0.732411
MA0772.1_IRF7	CD8+ γδ T	-0.00192639	0.0063552	0.0109571	-0.00469264	0.00941126	-0.00179431	0.0128292	0.00353231	0.0183712	0.436717	0.732411
MA0762.1_ETV2	CD8+ γδ T	-0.00321501	-0.00153538	-0.00783538	-0.00590147	-0.00443851	0.00620632	-0.0010048	-0.00416355	-0.0166729	0.44592	0.740135
MA0796.1_TGIF1	CD8+ γδ T	0.00993804	0.0109745	-0.000906883	-0.00263405	0.01697	-0.00501328	-0.00821342	0.00162061	0.0010154	0.456446	0.749876
MA0050.2_IRF1	CD8+ γδ T	-0.00187854	-0.000360483	0.00573348	-0.00533585	0.00189062	-0.00636343	0.00384744	0.00335836	0.00976182	0.469507	0.763542
MA0645.1_ETV6	CD8+ γδ T	-0.00273516	-0.000314042	-0.00821177	-0.00757555	-0.00461013	0.0111422	0.000829544	-0.00596657	-0.0168587	0.480091	0.772947
MA0628.1_POU6F1	CD8+ γδ T	-0.00615011	0.0111016	0.017956	0.00131568	0.00170492	0.0361595	0.00376839	0.0335122	0.00926534	0.48798	0.77787
MA0773.1_MEF2D	CD8+ γδ T	-0.000846487	0.00351334	0.00631178	-0.00211041	0.00179906	0.00808476	0.00434143	0.00322656	0.0112248	0.498168	0.785486
MA0729.1_RARA	CD8+ γδ T	0.00443225	0.00200199	-0.00580045	-0.00248307	0.00467531	-0.00512686	0.00734761	-0.0104676	-0.0091208	0.503825	0.785486
MA0759.1_ELK3	CD8+ γδ T	-0.0101145	-0.00526735	-0.00237799	-0.0142541	-0.00951451	0.0060584	0.0075437	0.00148036	-0.0134939	0.507394	0.785486
MA0903.1_HOXB3	CD8+ γδ T	-0.00584104	-0.00145354	0.00966577	-0.00206472	-0.00624747	0.0113303	-0.00204103	0.0226543	0.00231697	0.520664	0.798351
MA0808.1_TEAD3	CD8+ γδ T	-0.0110559	-0.00372833	-0.00233585	-0.0163404	-0.00816024	0.00809009	-0.000514933	-0.00320473	-0.00253611	0.527233	0.800797
MA0661.1_MEOX1	CD8+ γδ T	0.000783448	-0.00750467	0.0147964	-0.0188415	-0.0165488	0.0166129	0.0102594	0.0373533	-0.00849544	0.541373	0.81459
MA0105.4_NFKB1	CD8+ γδ T	-0.00671286	0.00752786	-0.0121515	0.00613626	0.00822343	0.00567299	-0.0100331	-0.00783161	-0.0186037	0.547985	0.815716
MA0486.2_HSF1	CD8+ γδ T	0.00494643	0.00255238	-0.00312257	-0.0131484	0.0027219	0.00210031	0.00281441	0.00469815	-0.0162047	0.552255	0.815716
MA0497.1_MEF2C	CD8+ γδ T	-0.00284951	0.00085087	0.000572319	-0.00894228	-0.000954176	0.00566433	0.00582269	-0.00487717	0.00342981	0.561377	0.817367
MA0732.1_EGR3	CD8+ γδ T	-0.000966359	-0.00353243	-0.00215003	0.00197068	-0.00294001	-0.0051122	0.000971295	-0.0015092	-0.00497856	0.563526	0.817367
MA0795.1_SMAD3	CD8+ γδ T	-0.0017407	-0.0123557	0.00296066	0.0236499	-0.0134753	-0.0093701	0.0126071	0.00389783	-0.00456364	0.572939	0.82016
MA0663.1_MLX	CD8+ γδ T	-0.00883289	0.00156664	0.000520207	-0.000799243	-0.000954485	0.00828963	0.0114025	-0.00847809	0.00376334	0.578813	0.82016
MA0855.1_RXRB	CD8+ γδ T	0.00293408	-0.000890115	-0.000999987	-0.00393105	0.000526923	-0.00466888	0.0076624	0.00175862	-0.00999328	0.585839	0.82016
MA0258.2_ESR2	CD8+ γδ T	0.00227218	0.00220809	-0.00204932	0.000763405	0.0040579	-0.00272474	0.00218109	-0.0106296	0.00514072	0.592866	0.82016
MA0653.1_IRF9	CD8+ γδ T	-0.000210889	0.00734213	0.00470011	-0.00874975	0.013287	-0.00851095	0.00474158	0.000999547	0.00898979	0.593267	0.82016
MA0070.1_PBX1	CD8+ γδ T	0.00338584	-0.00140267	0.00716558	0.000509194	-0.0030262	0.00292677	0.00918592	0.00680857	0.00623519	0.596017	0.82016
MA0059.1_MAX::MYC	CD8+ γδ T	-0.00886695	0.000871273	-0.00176982	-0.00625721	0.00547445	-0.0114039	0.00688558	-0.00200003	-0.00727152	0.60536	0.823653
MA0048.2_NHLH1	CD8+ γδ T	0.0037848	-0.0019957	-0.0025833	0.000792232	-0.00313521	0.00104298	-0.000658238	-0.000262121	-0.00657471	0.608787	0.823653
MA0074.1_RXRA::VDR	CD8+ γδ T	-0.00694576	0.0011935	-0.00281907	0.00788948	0.00223452	-0.00158254	0.00458365	-0.00811305	-0.0015779	0.623455	0.833495
MA0719.1_RHOXF1	CD8+ γδ T	-0.00433102	-0.00196957	0.00155356	0.00217444	-0.00635651	0.00972892	0.0064657	-0.0016777	0.0020486	0.626416	0.833495
MA0821.1_HES5	CD8+ γδ T	-0.0100916	-0.00113911	-0.00418636	0.00099731	-0.00123191	-0.000891656	-0.00748572	0.00558197	-0.0133832	0.643381	0.849052
MA0163.1_PLAG1	CD8+ γδ T	-0.00204146	0.00198457	-0.00205706	-0.0038332	0.00335664	-0.00167428	0.00405604	-0.00651093	-0.000936267	0.661345	0.865663
MA0887.1_EVX1	CD8+ γδ T	-0.0099531	0.00493084	0.00274942	-0.00172316	-0.00791557	0.0391879	-0.00460745	0.0342071	-0.0290467	0.674451	0.875699
MA0797.1_TGIF2	CD8+ γδ T	0.00703796	0.00543578	-0.000717768	-0.00794042	0.0106436	-0.00845171	0.00174255	-0.00293405	0.000227684	0.689817	0.888485
MA0752.1_ZNF410	CD8+ γδ T	0.00375904	-0.00321112	-0.00560226	-0.00226748	-0.00212253	-0.00611403	0.00301246	-0.00216833	-0.0153517	0.715053	0.902269
MA0760.1_ERF	CD8+ γδ T	-0.00946685	-0.00542685	-0.00720695	-0.00584225	-0.00672372	-0.00196856	0.00128747	-0.00220165	-0.0187094	0.715989	0.902269
MA0475.2_FLI1	CD8+ γδ T	-0.00993387	-0.00316146	-0.00696323	-0.00846348	-0.00678892	0.00651179	0.00192273	-0.000578071	-0.0203366	0.717434	0.902269
MA0098.3_ETS1	CD8+ γδ T	-0.00851587	-0.0044503	-0.0051855	-0.0101828	-0.00816873	0.00546551	0.00565084	-0.000134032	-0.0183031	0.722936	0.902269
MA0692.1_TFEB	CD8+ γδ T	-0.00871154	-0.0056336	-0.00342654	-0.00102604	-0.00796897	0.00059404	0.0094819	-0.00764432	-0.00711142	0.738503	0.914607
MA0771.1_HSF4	CD8+ γδ T	0.00384486	0.000311584	-0.00139386	-0.0074576	0.0030387	-0.00696073	-0.00207022	0.0149967	-0.0200653	0.750714	0.920015
MA0749.1_ZBED1	CD8+ γδ T	-0.0131848	-0.00528384	-0.00126695	0.000294412	0.00608413	-0.0355984	0.0169872	0.0120521	-0.0289753	0.754298	0.920015
MA0763.1_ETV3	CD8+ γδ T	-0.00815578	0.000623864	-0.00625196	-0.0102423	-0.00114994	0.005354	0.00420659	-0.00228884	-0.017848	0.77151	0.927564
MA0145.3_TFCP2	CD8+ γδ T	-0.0111131	-0.00800769	-0.000725461	-0.000905145	-0.00962894	-0.00368436	-0.0115291	-0.00428133	0.0106255	0.772009	0.927564
MA0259.1_ARNT::HIF1A	CD8+ γδ T	-0.00460365	-0.00960831	-0.00600498	0.00567819	-0.0148987	0.00449942	-0.00621112	0.00180454	-0.0149787	0.78652	0.935085
MA0834.1_ATF7	CD8+ γδ T	-0.000771509	0.00489606	0.000105673	-0.0080933	0.00309703	0.00969347	0.000811238	0.00599051	-0.00723035	0.789885	0.935085
MA0735.1_GLIS1	CD8+ γδ T	0.00246457	0.0031145	0.000769343	-0.00253034	0.00189212	0.00637418	-0.000826755	0.00369995	-0.00158563	0.801647	0.935289
MA0914.1_ISL2	CD8+ γδ T	0.00664542	-0.00163301	0.00161355	0.00556431	-0.00320883	0.00256917	0.00102886	0.00353995	-0.000244116	0.814405	0.935289
MA0848.1_FOXO4	CD8+ γδ T	-0.00272807	-0.00173424	0.00152426	-0.0106476	-0.00294397	0.00149171	0.000986354	0.00917517	-0.00704321	0.822846	0.935289
MA0849.1_FOXO6	CD8+ γδ T	-0.00272807	-0.00173424	0.00152426	-0.0106476	-0.00294397	0.00149171	0.000986354	0.00917517	-0.00704321	0.822846	0.935289
MA0850.1_FOXP3	CD8+ γδ T	-0.00272807	-0.00173424	0.00152426	-0.0106476	-0.00294397	0.00149171	0.000986354	0.00917517	-0.00704321	0.822846	0.935289
MA0776.1_MYBL1	CD8+ γδ T	-0.00535604	0.00154388	0.00212196	-0.00292335	-0.00998341	0.0322833	-0.0113533	0.0269002	-0.0178025	0.829445	0.935289
MA0466.2_CEBPB	CD8+ γδ T	-0.0120607	-0.0135328	-0.00370082	0.0128317	-0.0109662	-0.020377	-0.00554159	0.0169348	-0.0265485	0.830722	0.935289
MA0698.1_ZBTB18	CD8+ γδ T	0.0022827	-0.000745713	0.00270776	0.00503755	0.00155386	-0.00687791	0.000845189	0.00620916	-0.0001355	0.837529	0.936404
MA0652.1_IRF8	CD8+ γδ T	0.0030465	0.00163166	0.0101266	-0.0174847	0.00578774	-0.00945123	0.0119726	0.00590727	0.0138184	0.853247	0.937785
MA0635.1_BARHL2	CD8+ γδ T	-0.00929026	-0.0140539	-0.00738438	-0.00480822	-0.0264395	0.0189744	0.0119554	0.00449601	-0.034138	0.860063	0.937785
MA0112.3_ESR1	CD8+ γδ T	-0.00161033	0.00299871	-0.0017438	-0.0042473	0.00726934	-0.00838965	0.0114166	-0.0108486	0.000104798	0.866477	0.937785
MA0625.1_NFATC3	CD8+ γδ T	-0.00521837	-0.0060985	-0.00262141	-0.00508218	-0.00354854	-0.0128984	0.00545047	0.00647684	-0.0186173	0.870314	0.937785
MA0510.2_RFX5	CD8+ γδ T	-0.00225614	0.0025311	0.0014179	-0.0137837	-0.00331294	0.0181152	0.00330438	0.00845495	-0.00804963	0.871625	0.937785
MA0051.1_IRF2	CD8+ γδ T	0.00301567	0.00738541	0.00552657	-0.00679061	0.0117423	-0.00423286	-0.00497213	-0.000101823	0.0190922	0.873712	0.937785
MA0799.1_RFX4	CD8+ γδ T	-0.000934245	0.004598	0.002503	-0.0159034	0.00250752	0.0101726	0.00289652	0.0127275	-0.00968797	0.895403	0.950857
MA0694.1_ZBTB7B	CD8+ γδ T	-0.000931505	-0.000508204	0.00234761	-0.00308259	0.00154886	-0.0059937	0.00780521	0.00539057	-0.00484091	0.897704	0.950857
MA0076.2_ELK4	CD8+ γδ T	-0.00604047	-0.00392201	-0.00554945	-0.0117635	-0.00700199	0.00429127	0.00299725	-0.00355939	-0.013569	0.905368	0.952708
MA0770.1_HSF2	CD8+ γδ T	-0.00192677	-0.000234122	-0.00528184	-0.0177888	0.00402982	-0.0116046	0.0010322	0.000926916	-0.0167347	0.916105	0.952837
MA0641.1_ELF4	CD8+ γδ T	-0.00559051	-0.0025869	-0.00527755	-0.0169797	-0.00565129	0.00558483	0.00724336	-0.00578247	-0.0130357	0.917327	0.952837
MA0599.1_KLF5	CD8+ γδ T	-0.00227931	-0.00137365	-0.00152645	-0.00269694	-0.000767331	-0.00299052	-0.000431826	-0.00149475	-0.00229319	0.929778	0.953467
MA0600.2_RFX2	CD8+ γδ T	-0.00320329	0.00236436	0.0060163	-0.0195796	-0.00189441	0.0137211	0.00579654	0.0164621	-0.00602399	0.929778	0.953467
MA0479.1_FOXH1	CD8+ γδ T	0.000404483	0.00184924	0.00329812	-0.00685432	0.00413109	-0.00423568	-0.0114361	0.00417155	0.0121019	0.942908	0.960811
MA0637.1_CENPB	CD8+ γδ T	0.000263467	-0.0121717	0.00125278	-0.0239205	-0.0179642	0.00327487	0.00503383	0.00942899	-0.0108068	0.96245	0.974556
MA0819.1_CLOCK	CD8+ γδ T	-0.00375062	-0.00687931	0.00235405	0.00330435	-0.00589933	-0.0094926	2.54696e-05	0.00814452	-0.00284911	0.986938	0.990749
MA0733.1_EGR4	CD8+ γδ T	-0.00193325	-0.00207676	-0.00275369	0.000867252	-0.00111224	-0.00464881	-0.000567161	-0.002507	-0.00449918	0.990749	0.990749
MA0095.2_YY1	DC	-0.0126266	-0.00312764	0.0214168	-0.0181325	0.00268969	-0.0147623	0.0155152	0.0153226	0.0324611	0.00109208	0.170937	0.409811	0.00281293	0.0024195	0.409811	0.0042194	0.0042194
MA0599.1_KLF5	DC	0.00144447	-0.004843	0.00103538	0.00335072	-0.00470703	-0.00511496	0.00330105	0.000500544	0.000148903	0.00268777	0.170937	0.00334362	0.633368	0.003233	0.00501543	0.633368	0.00501543
MA0024.3_E2F1	DC	-0.0180751	-0.0120571	0.0311754	-0.00520276	-0.0199831	0.00379477	0.0217801	0.0117483	0.060104	0.00322923	0.170937	0.766679	0.00388867	0.00738457	0.766679	0.0110769	0.0110769
MA0653.1_IRF9	DC	-0.0176314	0.0037185	0.0332056	-0.0165622	0.00898269	-0.00680987	0.0338634	0.00967333	0.0602212	0.00451382	0.170937	0.0517542	0.00331122	0.0661139	0.0661139	0.00993366	0.0661139
MA0808.1_TEAD3	DC	0.00197397	-0.0157184	0.0136132	-0.00879492	-0.0200429	-0.00706957	0.00973828	0.00967575	0.0207902	0.00635128	0.170937	0.0377971	0.138557	0.00428869	0.0566956	0.138557	0.0128661
MA0794.1_PROX1	DC	-0.0127629	0.0273834	-0.00565273	0.0007472	0.0294065	0.023337	-0.00516464	-0.00965096	-0.00131353	0.00640069	0.170937	0.00269819	0.979971	0.0108921	0.00809457	0.979971	0.0163381
MA0652.1_IRF8	DC	-0.0210667	0.008678	0.0339841	-0.0236102	0.017403	-0.00877192	0.0434293	0.0111537	0.0543227	0.00687676	0.170937	0.00507291	0.00838882	0.319096	0.0125832	0.0125832	0.319096
MA0506.1_NRF1	DC	-0.00724383	-0.000656023	0.0102179	-0.0127521	0.000118509	-0.00220509	0.00149625	0.0105274	0.0156712	0.014939	0.324923	0.620928	0.0254614	0.0123542	0.620928	0.0381921	0.0370626
MA0050.2_IRF1	DC	-0.00083357	-0.00244127	0.00663158	-0.00752964	-0.0026836	-0.00195662	0.00591355	0.00362056	0.0106231	0.0238165	0.328319	0.575157	0.0254614	0.0253401	0.575157	0.0381921	0.0381921
MA0772.1_IRF7	DC	-0.0135499	0.00488327	0.0270377	-0.0130008	0.00927182	-0.00389383	0.0209755	0.0165696	0.0432919	0.0247128	0.328319	0.106206	0.0129414	0.163063	0.159309	0.0388242	0.163063
MA0511.2_RUNX2	DC	0.0184154	0.00134295	-0.00776229	0.00698866	-0.003789	0.0116069	0.0108941	-0.000994294	-0.0280958	0.0251499	0.328319	0.0697861	0.00971542	0.364008	0.104679	0.0291463	0.364008
MA0637.1_CENPB	DC	-0.020624	-0.00281361	0.0120811	-0.00465432	-0.00966693	0.010893	-0.00408507	0.0251559	0.00760463	0.0267348	0.328319	0.0805752	0.0129414	0.24062	0.120863	0.0388242	0.24062
MA0513.1_SMAD2::SMAD3::SMAD4	DC	0.00960222	-0.00411697	-0.00927059	0.00840794	-0.00471424	-0.00292242	-0.0118184	0.00213521	-0.0208788	0.0275219	0.328319	0.0321142	0.0129414	0.807584	0.0481713	0.0388242	0.807584
MA0724.1_VENTX	DC	-0.022754	0.015803	0.033539	-0.0144823	0.0129673	0.0214744	-0.00437012	0.0433298	0.0473892	0.028174	0.328319	0.0229142	0.0195566	0.54998	0.0343713	0.0343713	0.54998
MA0645.1_ETV6	DC	0.00839784	-0.00945727	-0.0109882	-0.00270422	-0.0141955	1.9269e-05	0.00724014	-0.013269	-0.0204795	0.0283034	0.328319	0.0192424	0.0195566	1	0.0293348	0.0293348	1
MA0139.1_CTCF	DC	-0.0176669	0.016076	0.0250762	-0.0142022	0.0157059	0.016816	-0.00341737	0.00923403	0.0625544	0.0312372	0.336205	0.0192424	0.0254614	0.54998	0.0381921	0.0381921	0.54998
MA0051.1_IRF2	DC	-0.00721543	-0.00359031	0.0240926	-0.0144071	-0.000813707	-0.00914352	0.0256384	0.00583408	0.0443636	0.0333389	0.336205	0.668216	0.0254614	0.0439283	0.668216	0.0658925	0.0658925
MA0639.1_DBP	DC	-0.00144499	0.0258762	-0.0197671	-0.0167991	0.029975	0.0176786	-0.0111917	0.00521873	-0.0546341	0.0353603	0.336205	0.106206	0.497879	0.0123542	0.159309	0.497879	0.0370626
MA0642.1_EN2	DC	-0.00742318	0.0241837	0.00891242	-0.0139175	0.0313167	0.00991762	-0.00033298	-0.0116542	0.0390704	0.0367121	0.336205	0.00757404	0.183335	0.22333	0.0227221	0.22333	0.22333
MA0691.1_TFAP4	DC	0.00832588	0.000762184	-0.0167274	0.00931714	-0.00155943	0.00540541	-0.00971513	-0.0121566	-0.0267349	0.0448066	0.389817	0.339021	0.0148849	0.176836	0.339021	0.0446547	0.265253
MA0517.1_STAT1::STAT2	DC	-0.00404929	-0.00311681	0.0101863	-0.00844993	-0.00378866	-0.00177312	0.0116079	-0.00103031	0.0223247	0.0476387	0.394721	0.921212	0.042003	0.0439283	0.921212	0.0658925	0.0658925
MA0894.1_HESX1	DC	0.00154108	-0.00125434	0.0197916	-0.0174505	0.00339694	-0.0105569	0.00788369	0.0109572	0.0380371	0.0511866	0.404839	1	0.0371874	0.0540779	1	0.0811168	0.0811168
MA0694.1_ZBTB7B	DC	-0.00526342	0.00734451	0.00581652	-0.00433168	0.00259088	0.0168518	-0.00398397	0.0165486	-0.000170618	0.0568844	0.429463	0.0926813	0.0195566	0.673998	0.139022	0.0586697	0.673998
MA0855.1_RXRB	DC	-0.00296446	-0.0114584	0.00305163	-0.00599391	-0.0108658	-0.0126436	0.00472982	0.00915213	-0.00518442	0.0614467	0.429463	0.156288	0.466589	0.0225805	0.234432	0.466589	0.0677416
MA0497.1_MEF2C	DC	-0.00627764	0.00479508	0.0080469	-0.00273706	0.00622766	0.00192993	0.00867164	0.00395842	0.0124003	0.0617044	0.429463	0.0805752	0.0254614	0.641969	0.120863	0.0763843	0.641969
MA0729.1_RARA	DC	-0.0109546	0.00707793	-0.00309073	-0.00165465	0.00428525	0.0126633	-0.00554645	0.00179442	-0.00715291	0.0669256	0.430299	0.0160957	0.238029	0.258831	0.048287	0.258831	0.258831
MA0140.2_GATA1::TAL1	DC	0.0144804	-0.00775617	-0.0156859	-8.82888e-05	-0.0167886	0.0103087	-0.00250042	-0.0264502	-0.0119179	0.0689861	0.430299	0.106206	0.0254614	0.610592	0.159309	0.0763843	0.610592
MA0771.1_HSF4	DC	-0.00397016	0.0108544	-0.00198992	-0.00988298	0.00457583	0.0234116	0.00548897	0.00182137	-0.0114224	0.0704698	0.430299	0.0321142	0.379581	0.106041	0.0963425	0.379581	0.159061
MA0478.1_FOSL2	DC	0.0474234	-0.00877863	-0.0308306	-0.00784739	-0.00365445	-0.019027	-0.0428995	-0.018508	-0.037161	0.0733316	0.430299	0.121251	0.0223399	0.773481	0.181876	0.0670197	0.773481
MA0048.2_NHLH1	DC	0.00327243	-0.00613901	0.00176523	0.0023597	-0.00664373	-0.00512956	-0.00074967	0.00996322	-0.00612248	0.0777271	0.430299	0.0271799	0.821245	0.0882301	0.0815397	0.821245	0.132345
MA0476.1_FOS	DC	0.0473413	-0.015012	-0.0281851	-0.0118028	-0.0095706	-0.0258948	-0.0369677	-0.0134273	-0.0395476	0.0786238	0.430299	0.121251	0.0223399	0.982336	0.181876	0.0670197	0.982336
MA0758.1_E2F7	DC	-0.00420148	-0.0015901	0.0111624	-0.0169954	0.00530212	-0.0153745	0.0104899	4.01494e-06	0.0246288	0.0791354	0.430299	0.668216	0.0328502	0.137967	0.668216	0.0985505	0.20695
MA0507.1_POU2F2	DC	0.00295298	0.00447399	-0.00531851	-0.0129771	0.0065876	0.000246776	0.00109156	-0.0132515	-0.000336676	0.0971843	0.490302	0.921212	0.11374	0.0540779	0.921212	0.17061	0.162234
MA0674.1_NKX6-1	DC	-0.0184457	-0.00597416	0.0146132	0.00603057	0.0059418	-0.0298061	0.0115014	0.0024205	0.0309125	0.0984635	0.490302	0.921212	0.0925644	0.0661139	0.921212	0.138847	0.138847
MA0662.1_MIXL1	DC	-0.0110492	-0.0028062	0.00697147	-0.00112575	0.00562339	-0.0196654	-0.0143006	0.00808173	0.0198576	0.098624	0.490302	0.137913	0.0668543	0.24062	0.20687	0.200563	0.24062
MA0259.1_ARNT::HIF1A	DC	-0.00883936	0.0124235	0.00460113	-0.0116033	0.0110583	0.0151541	0.00602515	0.00634766	0.00161416	0.103785	0.492995
MA0628.1_POU6F1	DC	-0.0253933	0.0178393	0.0014787	0.0133634	0.022806	0.00790582	-0.00502366	0.0139803	-0.00877153	0.105894	0.492995
MA0660.1_MEF2B	DC	-0.00365729	0.0154497	0.0100906	-0.00975427	0.0180831	0.0101828	0.00869078	0.00322538	0.0190332	0.107666	0.492995
MA0597.1_THAP1	DC	0.00651361	-0.00485941	-0.00578774	0.00614652	-0.00860257	0.00262693	-0.00202368	-0.00173646	-0.0130236	0.117438	0.523955
MA0641.1_ELF4	DC	0.0043066	-0.00943735	-0.00647622	-0.00537903	-0.0111761	-0.00595993	0.00554584	-0.0115931	-0.00852128	0.122814	0.530706
MA0690.1_TBX21	DC	0.000498336	-0.00663753	0.0110334	-0.00996574	-0.00428803	-0.0113365	0.00598804	0.0159614	0.00864769	0.128097	0.530706
MA0071.1_RORA	DC	0.00438248	-0.00481538	-0.0104316	-0.00179252	-0.0024908	-0.00946454	-0.000289618	-0.0177705	-0.00863076	0.128102	0.530706
MA0685.1_SP4	DC	-0.00300498	-0.00175675	0.00597122	-0.00106975	0.00218003	-0.00963032	0.0049233	0.000683309	0.0128391	0.134664	0.533504
MA0773.1_MEF2D	DC	-0.00549698	0.0110561	0.0100497	-0.00361348	0.0122131	0.00874197	0.00617119	0.0034415	0.020345	0.136796	0.533504
MA0634.1_ALX3	DC	-0.011106	0.00257557	0.00611441	-0.00404991	0.00335126	0.0010242	0.00171977	0.0104918	0.00393717	0.141041	0.533504
MA0762.1_ETV2	DC	0.00417877	-0.0099156	-0.00851728	-0.00117138	-0.0140452	-0.00165642	-0.00646585	0.00190068	-0.0220392	0.141041	0.533504
MA0144.2_STAT3	DC	-0.005434	3.91147e-05	0.00514926	-0.0134305	-0.00417755	0.00847245	0.00368907	-0.00177309	0.0141988	0.144473	0.534857
MA0755.1_CUX2	DC	-0.0177723	0.0127986	-0.00426151	-0.0290721	0.01522	0.00795566	0.00815267	-0.029646	0.0170776	0.152199	0.551721
MA0801.1_MGA	DC	-0.00360503	0.0044215	-0.00797205	-0.00135087	-0.00021928	0.0137031	-0.012468	-0.00844226	-0.00442615	0.159526	0.553536
MA0527.1_ZBTB33	DC	-0.0096714	0.00513623	0.0116365	-0.00774887	0.00183408	0.0117405	0.0110026	0.00673709	0.0177751	0.160264	0.553536
MA0083.3_SRF	DC	0.0101004	0.00137391	-0.0117037	1.71432e-05	-0.00811083	0.0203434	-0.0136947	-0.00904575	-0.0134774	0.162243	0.553536
MA0848.1_FOXO4	DC	-0.00722686	0.00532112	0.00847838	-0.00272599	-0.000583555	0.0171305	0.0117292	-0.00114769	0.0175416	0.175444	0.565321
MA0849.1_FOXO6	DC	-0.00722686	0.00532112	0.00847838	-0.00272599	-0.000583555	0.0171305	0.0117292	-0.00114769	0.0175416	0.175444	0.565321
MA0850.1_FOXP3	DC	-0.00722686	0.00532112	0.00847838	-0.00272599	-0.000583555	0.0171305	0.0117292	-0.00114769	0.0175416	0.175444	0.565321
MA0655.1_JDP2	DC	0.0421207	-0.0137554	-0.0143384	-0.00195944	-0.0100377	-0.0211907	-0.0308313	-0.00967499	-0.00878383	0.179205	0.56694
MA0152.1_NFATC2	DC	-0.00519151	0.000574685	0.00358888	-0.00502221	0.00136395	-0.00100384	-0.000815702	0.00656137	0.00305736	0.184538	0.573385
MA0113.3_NR3C1	DC	-0.00293105	-0.0141113	0.00234664	-0.0234533	-0.0152786	-0.0117767	0.00276986	0.0180833	-0.0162949	0.188543	0.575551
MA0630.1_SHOX	DC	-0.00750019	0.0209451	0.00982069	-0.00954365	0.031068	0.000699287	-0.00932943	0.00145432	0.0323482	0.197885	0.578382
MA0717.1_RAX2	DC	-0.00750019	0.0209451	0.00982069	-0.00954365	0.031068	0.000699287	-0.00932943	0.00145432	0.0323482	0.197885	0.578382
MA0792.1_POU5F1B	DC	-0.00786726	0.00531576	-0.000129864	-0.0113596	0.00942616	-0.00290502	0.00375281	-0.000372474	-0.00243527	0.206042	0.578382
MA0822.1_HES7	DC	-0.00618917	0.0122709	0.000706278	-0.00733335	0.0101817	0.0164493	-0.000449052	0.00342628	-0.00169684	0.206776	0.578382
MA0671.1_NFIX	DC	0.00521821	0.000721013	-0.00852233	-0.0054765	0.00237787	-0.0025927	-0.0179271	-0.00621492	-0.00494449	0.210542	0.578382
MA0145.3_TFCP2	DC	-0.0125457	0.00299641	-0.00356116	-0.012494	-0.00113431	0.0112579	-0.00611987	0.0151444	-0.0236785	0.21861	0.578382
MA0159.1_RARA::RXRA	DC	0.0101121	-0.00564913	-0.00488686	0.00263603	-0.00851044	7.34833e-05	0.00195285	-0.00377246	-0.0107468	0.219092	0.578382
MA0498.2_MEIS1	DC	-0.00190271	-0.00797311	0.00798509	-0.00782635	-0.0129397	0.00196015	0.00871471	0.00936532	0.0058884	0.221322	0.578382
MA0163.1_PLAG1	DC	-0.00194606	-0.00564399	-0.000844301	-0.00366725	-0.00592658	-0.00507882	0.00502518	0.00250895	-0.00866941	0.224486	0.578382
MA0786.1_POU3F1	DC	-0.00803114	0.00416897	-0.00256393	-0.0080029	0.00992097	-0.00733504	-0.00242673	-0.000128812	-0.00549638	0.228455	0.578382
MA0046.2_HNF1A	DC	-0.0109861	-0.00400258	0.00810823	-0.00706188	-0.0107133	0.00941894	0.00563702	0.0197482	-0.00382427	0.231061	0.578382
MA0669.1_NEUROG2	DC	0.0186621	-0.00974599	0.000486138	-0.00759089	-0.0127172	-0.00380364	0.00403159	0.00211117	-0.00377337	0.23231	0.578382
MA0657.1_KLF13	DC	-0.00524357	0.00324519	0.00443643	-2.28188e-05	0.00638125	-0.00302692	0.00446137	0.00194873	0.00732212	0.232682	0.578382
MA0826.1_OLIG1	DC	0.00905503	-0.010974	-0.0190932	-0.00669903	-0.00744333	-0.0180352	-0.010162	-0.0111431	-0.0343224	0.253764	0.618889
MA0157.2_FOXO3	DC	-0.00874971	0.00679519	0.0100149	-0.0107137	-7.52507e-05	0.0205361	-0.00503163	0.000736685	0.0308706	0.262301	0.618889
MA0768.1_LEF1	DC	0.00871595	-0.00195663	0.00360738	0.00416921	-0.00493224	0.00399458	-0.00695974	0.00756641	0.00603326	0.263977	0.618889
MA0802.1_TBR1	DC	-0.00604071	-0.00276778	0.00935181	0.00112691	-0.00718421	0.00606509	-0.00088354	0.00360292	0.0228824	0.266601	0.618889
MA0732.1_EGR3	DC	-0.00110622	-0.0036011	0.00340915	-0.00752371	-0.00263027	-0.00554274	0.00168699	-0.00106527	0.00977741	0.266926	0.618889
MA0741.1_KLF16	DC	-0.001603	-0.0018609	0.00215174	0.000204157	-0.000725862	-0.00413097	0.00223844	0.000423363	0.00411039	0.271693	0.618889
MA0625.1_NFATC3	DC	-0.00291715	0.00429918	0.010692	-0.00623731	0.00442649	0.00404455	0.000189815	0.0178505	0.00934192	0.275563	0.618889
MA0785.1_POU2F1	DC	-0.0062993	0.00306907	0.00337876	-0.00543137	0.00642744	-0.00364769	0.00140078	0.00882043	-0.00165121	0.277433	0.618889
MA0088.2_ZNF143	DC	0.0020901	0.0109791	-0.000750338	-0.00498009	0.00733163	0.0182739	-0.00871037	0.0035322	-0.00043994	0.282549	0.622323
MA0076.2_ELK4	DC	0.00336146	-0.00395994	-0.00611814	-0.0060945	-0.00295246	-0.0059749	0.00738384	-0.00877612	-0.0120185	0.295354	0.628236
MA0699.1_LBX2	DC	-0.00415208	0.00854288	0.0149872	-0.02722	0.0102362	0.00515614	0.00595413	0.0126306	0.0237586	0.295978	0.628236
MA0131.2_HINFP	DC	-0.00666643	0.000366392	0.00518629	-0.00359943	0.000704853	-0.000310531	0.0039504	-0.000122259	0.0122035	0.296065	0.628236
MA0115.1_NR1H2::RXRA	DC	-0.00538118	-0.0148273	-0.00173082	-0.00203521	-0.0120042	-0.0204735	-0.00175685	0.0108678	-0.0164118	0.311485	0.648615
MA0032.2_FOXC1	DC	0.000112628	0.00905867	0.00450865	-0.00692568	0.00964953	0.00787695	-0.00147654	-3.17035e-06	0.0137626	0.315477	0.648615
MA0112.3_ESR1	DC	0.00833883	0.00980383	0.000956062	-0.00807333	0.00760683	0.0141978	-0.00343282	0.00418208	0.00011829	0.318262	0.648615
MA0776.1_MYBL1	DC	-0.00268074	-0.0207225	0.0120881	-0.00973898	-0.00877513	-0.0446172	0.00891693	-0.00745048	0.0369973	0.32058	0.648615
MA0464.2_BHLHE40	DC	-0.00782601	0.00616221	0.00272033	0.00368892	0.00361055	0.0112655	-0.00279395	0.00478023	0.00399331	0.34413	0.688261
MA0501.1_MAF::NFE2	DC	0.0200872	0.00160773	-0.00193174	-0.00881312	0.00309994	-0.0013767	-0.0146147	-0.00975669	0.0156527	0.358219	0.708297
MA0775.1_MEIS3	DC	0.00297905	-0.00339645	-0.00806654	-0.00141546	-0.00595366	0.00171798	-0.00540051	-0.0124752	-0.00470049	0.364115	0.711588
MA0821.1_HES5	DC	-0.00255511	0.0100518	0.00211312	0.000100202	0.00738542	0.0153845	0.00456468	0.00141387	0.00129453	0.368063	0.711588
MA0841.1_NFE2	DC	0.0360656	-0.00487625	-0.0149426	-0.00740008	-0.00477181	-0.00508512	-0.0173082	-0.0101894	-0.018911	0.382646	0.731653
MA0070.1_PBX1	DC	-0.00564287	-0.00103341	0.0074731	-0.00394445	-0.00488541	0.0066706	-0.000200031	-0.000821797	0.0222659	0.387607	0.733082
MA0130.1_ZNF354C	DC	-0.0031553	-0.000770235	0.00143414	0.00196319	-0.00619693	0.0100832	0.00587807	0.00408254	-0.00461828	0.394902	0.737204
MA0058.3_MAX	DC	-0.00144178	0.0103975	0.00101416	-0.000544053	0.0203903	-0.00958819	0.00663119	-0.000799076	-0.000615092	0.40401	0.737204
MA0763.1_ETV3	DC	-0.00145113	-0.00693375	-0.00208771	-0.00923134	-0.0123907	0.00398014	0.00703326	-0.00694772	-0.00249833	0.409212	0.737204
MA0791.1_POU4F3	DC	1.4809e-05	-0.00265613	0.00664982	-0.00952332	-0.00353306	-0.000902263	-0.00335845	0.0114611	0.0077088	0.410696	0.737204
MA0138.2_REST	DC	-6.96115e-05	0.00435952	-0.00553036	0.00321646	0.00629164	0.000495281	-0.00223126	-0.00847914	-0.00428951	0.41097	0.737204
MA0523.1_TCF7L2	DC	0.00335106	-0.00422578	0.00278336	0.00366777	-0.000199005	-0.0122793	0.00071883	-0.0029618	0.0108624	0.415834	0.738317
MA0028.2_ELK1	DC	-0.00460227	-0.00125717	0.00600048	-0.0128841	-0.00730889	0.0108463	0.017915	0.00470595	-0.000432263	0.427007	0.741179
MA0504.1_NR2C2	DC	0.00313206	-0.00412315	-0.00153659	-0.00295735	-0.00380916	-0.00475112	0.00637167	0.000693529	-0.00941058	0.430894	0.741179
MA0600.2_RFX2	DC	0.00314678	0.000368489	0.0118038	-0.00337301	-0.00368909	0.00848365	0.00615593	0.019866	0.00616307	0.441872	0.741179
MA0899.1_HOXA10	DC	-0.0077759	7.14496e-05	0.00420875	0.000471747	-0.00306651	0.00634737	-0.00447029	0.0081433	0.00540448	0.444957	0.741179
MA0666.1_MSX1	DC	0.000235144	0.0170708	0.0148269	-0.0252679	0.00695754	0.0372973	0.0168584	0.00683965	0.0227909	0.446859	0.741179
MA0708.1_MSX2	DC	0.000235144	0.0170708	0.0148269	-0.0252679	0.00695754	0.0372973	0.0168584	0.00683965	0.0227909	0.446859	0.741179
MA0137.3_STAT1	DC	-0.00672341	0.000931666	0.00709339	-0.0137559	-0.00620166	0.0151983	0.00753229	0.00329805	0.0112287	0.447263	0.741179
MA0073.1_RREB1	DC	-0.00270919	0.0019012	-0.000428273	0.00203093	-0.00119773	0.00809906	0.0034017	0.00202723	-0.00584635	0.453547	0.744502
MA0749.1_ZBED1	DC	-0.0187494	0.00263984	0.0011903	-0.020283	0.00876877	-0.00961801	0.0312918	-0.000845357	-0.0165025	0.468088	0.755554
MA0670.1_NFIA	DC	0.00467064	-0.000293341	-0.00953618	-0.00699278	-0.00434181	0.00780359	-0.00275879	-0.0156198	-0.00695687	0.468964	0.755554
MA0752.1_ZNF410	DC	0.000570398	-0.00277185	0.00719198	0.000874059	-0.00552008	0.00272462	-0.00665791	0.00152075	0.0230417	0.485398	0.770866
MA0796.1_TGIF1	DC	0.0185838	0.00644102	0.00313683	-0.00128923	0.00783451	0.00365404	0.0144039	0.00553427	-0.00717157	0.487329	0.770866
MA0698.1_ZBTB18	DC	0.00348124	0.00162354	-0.00316536	0.00381587	0.00277785	-0.000685067	-0.00763303	0.000873865	-0.00489934	0.494461	0.775101
MA0760.1_ERF	DC	0.00382239	-0.00294184	-0.005574	-0.00224122	-0.00961805	0.0104106	0.0066051	-0.00409609	-0.0154176	0.499524	0.776047
MA0797.1_TGIF2	DC	0.0120668	0.00645845	-0.00598679	0.0032004	0.0145285	-0.00968165	0.0113634	-0.00667248	-0.0167536	0.512396	0.787894
MA0838.1_CEBPG	DC	0.00977525	0.0350797	0.0111777	-0.0220246	0.0492002	0.00683863	0.0218295	0.0204676	-0.00676173	0.516207	0.787894
MA0105.4_NFKB1	DC	-0.0134744	0.00188969	0.00115585	-0.00170876	-0.00132576	0.0083206	0.000661918	0.00533789	-0.0033939	0.529999	0.801912
MA0823.1_HEY1	DC	-0.000659114	0.00569602	-0.00278154	0.00312061	0.00494406	0.00719993	0.0078748	0.00657583	-0.0208027	0.545603	0.805793
MA0839.1_CREB3L1	DC	0.00390954	0.00614004	-0.00324125	0.00760108	0.00933109	-0.000242065	0.00545812	-0.00905555	-0.00225748	0.545603	0.805793
MA0820.1_FIGLA	DC	-0.00199765	0.00261686	-0.000821753	-0.00498875	0.00331356	0.00122346	0.0111602	-0.0127211	0.00507287	0.546493	0.805793
MA0466.2_CEBPB	DC	0.0102234	0.0277828	0.0010275	-0.0125037	0.0380932	0.0071619	0.0113911	0.0095816	-0.0158613	0.551332	0.805793
MA0861.1_TP73	DC	0.00163474	-0.00417981	-0.00452377	-0.0053312	-0.00252239	-0.00749465	-0.00906166	-0.0070714	0.00147373	0.555719	0.805793
MA0692.1_TFEB	DC	0.000327472	-0.00319019	0.00251541	0.000743739	-0.000714832	-0.00814089	0.00381084	0.00470289	-0.000900261	0.57341	0.81775
MA0727.1_NR3C2	DC	-0.00320986	-0.016724	-0.00888727	-0.0156874	-0.0234382	-0.00329572	-0.0183596	-0.00645917	-0.00540516	0.575722	0.81775
MA0107.1_RELA	DC	-0.00617502	0.0048063	-0.0101831	-0.000992054	0.00416385	0.00609121	-0.0205215	-0.00137819	-0.0135631	0.578065	0.81775
MA0474.2_ERG	DC	0.00193548	-0.00180783	-0.00815735	-0.00530149	-0.00715805	0.00889261	0.0097232	-0.0119328	-0.015673	0.582937	0.817993
MA0091.1_TAL1::TCF3	DC	0.00814919	-0.00425042	0.00143953	-0.000206027	-0.0106239	0.00849656	0.00756511	0.00588123	-0.00782616	0.591439	0.819415
MA0837.1_CEBPE	DC	0.00651781	0.0241334	0.000358255	-0.0151883	0.0304528	0.0114946	0.0144065	0.00462366	-0.0139835	0.593369	0.819415
MA0862.1_GMEB2	DC	-0.00766911	0.0267545	0.0107759	-0.00171442	0.0222329	0.0357978	0.00803524	0.0320701	-0.0122403	0.601168	0.823648
MA0595.1_SREBF1	DC	-0.00498283	0.002224	-0.000593997	0.00670407	-0.000106465	0.00688493	0.00915719	-0.00407307	-0.00303587	0.612765	0.832977
MA0795.1_SMAD3	DC	0.00983235	-0.00173403	-0.0128616	-0.0088855	-0.0171302	0.0290583	-0.0210087	-0.00646275	-0.0148954	0.619895	0.836137
MA0903.1_HOXB3	DC	-0.00789153	0.00127112	-0.00742462	0.00346318	0.00497044	-0.00612753	-0.0161551	-0.00412478	-0.00545408	0.633069	0.847339
MA0486.2_HSF1	DC	-0.00413056	0.00326534	8.92208e-05	-0.0104425	-0.00206869	0.0139334	0.00879704	-0.00114978	-0.00427049	0.645982	0.856129
MA0647.1_GRHL1	DC	0.00556175	0.0152189	0.00896263	-0.0244572	0.0129639	0.0197289	0.000190242	0.0219571	-0.000349314	0.649477	0.856129
MA0665.1_MSC	DC	0.0073771	-0.00583958	-0.00541685	-0.0048299	-0.0047164	-0.00808595	-0.00784595	-0.000636831	-0.00937412	0.661275	0.861264
MA0027.2_EN1	DC	-0.00311088	0.00876324	0.00674335	-0.0241773	0.0123102	0.00166937	0.0106782	0.00381639	0.00753493	0.663272	0.861264
MA0714.1_PITX3	DC	0.000352352	-0.00353642	0.00477766	-0.0049292	-0.00665799	0.0027067	-0.00667444	0.0116188	0.00443106	0.671729	0.865785
MA0101.1_REL	DC	-0.00606459	0.00405132	-0.00643789	-0.014314	0.00385249	0.00444898	-0.0179578	0.00652214	-0.013878	0.686194	0.877925
MA0472.2_EGR2	DC	0.000247092	-0.00194569	0.00164659	-0.00506388	0.000998966	-0.00783501	0.000246464	-0.00109203	0.00577506	0.69251	0.878218
MA0074.1_RXRA::VDR	DC	0.0014383	0.00173579	0.00768044	0.00161639	-3.87852e-05	0.00528493	0.00463628	0.00819766	0.00910645	0.702997	0.878218
MA0733.1_EGR4	DC	-0.00170545	-0.00125375	-0.000157131	-0.00799117	-0.00286438	0.00196752	0.00216125	-0.00834817	0.00785349	0.70573	0.878218
MA0648.1_GSC	DC	-0.00312737	0.00547697	-0.00359762	0.00120821	0.0122157	-0.00800047	-0.0131296	-0.0157209	0.0169008	0.706612	0.878218
MA0863.1_MTF1	DC	6.31844e-05	-0.0008869	0.00474469	-0.00511102	0.0053477	-0.0133561	-0.00464076	0.00799869	0.00720532	0.747829	0.897605
MA0774.1_MEIS2	DC	-0.00281383	-0.00040465	-0.00329964	0.0017712	-0.00333931	0.00546467	0.00432765	0.00195026	-0.0145094	0.749085	0.897605
MA0843.1_TEF	DC	0.00442198	0.0037764	-0.0151116	-0.0167174	0.0133798	-0.0154304	-0.00150367	0.00551902	-0.0482526	0.758264	0.897605
MA0844.1_XBP1	DC	-0.00118148	0.00256473	0.00817076	0.00781222	0.00510385	-0.00251351	-0.00192228	0.0273483	-0.00747429	0.76104	0.897605
MA0106.3_TP53	DC	0.00596293	-0.00111958	0.00668052	0.00441843	0.00354844	-0.0104556	-0.00803367	0.00584309	0.017467	0.761901	0.897605
MA0825.1_MNT	DC	-0.00196052	0.00243114	0.0016859	4.44642e-05	0.00634905	-0.00540468	0.00699783	-0.00613119	0.00726456	0.762945	0.897605
MA0770.1_HSF2	DC	-0.000363243	0.00263388	-0.0014874	-0.00914257	0.000729545	0.00644254	0.00206659	0.000298358	-0.00594012	0.764261	0.897605
MA0754.1_CUX1	DC	-0.0186572	0.00220406	-0.00563319	-0.0126547	-0.000215508	0.00704321	0.000264182	0.00270451	-0.0192921	0.772134	0.897605
MA0488.1_JUN	DC	0.00632056	0.00727924	0.000965316	-0.00646696	0.0128832	-0.00392875	-0.00532325	-0.00114052	0.0076145	0.778208	0.897605
MA0510.2_RFX5	DC	0.00723668	0.00278252	0.00379415	0.00428553	-0.0065937	0.0215349	0.00635938	0.0104083	-0.00563252	0.779962	0.897605
MA0066.1_PPARG	DC	-0.00098491	-0.00709429	-0.003786	0.00644723	-0.00805306	-0.00517676	-0.00583079	-0.00283625	-0.00353086	0.792045	0.897605
MA0759.1_ELK3	DC	-8.98058e-05	-0.0028251	-5.33113e-05	-0.00714614	-0.00952553	0.0105758	0.00929423	0.00050266	-0.00693364	0.793061	0.897605
MA0664.1_MLXIPL	DC	0.00114872	0.00341632	0.00413243	-0.00494853	0.00871516	-0.00718137	0.00228638	0.00717367	0.00181502	0.793722	0.897605
MA0834.1_ATF7	DC	0.00544991	0.00994396	0.0049417	-0.0142512	0.0149573	-8.2671e-05	-0.00538801	0.00555104	0.0111173	0.794432	0.897605
MA0719.1_RHOXF1	DC	0.00120477	0.00366938	0.00964834	-0.0103957	0.00160535	0.00779744	-0.00187934	-0.0128467	0.0435777	0.802101	0.900423
MA0525.2_TP63	DC	-0.000796004	0.00320511	-0.00576564	-0.00274266	-0.00191379	0.0134429	-0.0160364	0.00989904	-0.0171939	0.808249	0.901509
MA0804.1_TBX19	DC	-0.00047775	-0.00367666	0.000770497	-0.00593428	0.000463312	-0.0119566	-0.0102951	0.0100774	-0.00271042	0.829664	0.911467
MA0475.2_FLI1	DC	0.000158327	-0.00483286	-0.00745767	-0.00525207	-0.0126221	0.0107455	0.0069047	-0.0115436	-0.0122656	0.831064	0.911467
MA0895.1_HMBOX1	DC	-0.00336598	-0.011636	-0.0088469	0.0144225	-0.0107926	-0.013323	0.00457619	-0.00848218	-0.0182211	0.832893	0.911467
MA0059.1_MAX::MYC	DC	0.00133731	0.00339929	-0.00160701	0.00367734	0.0121598	-0.0141218	0.0111432	-0.00602463	-0.00495326	0.842651	0.916383
MA0790.1_POU4F1	DC	-0.00296349	0.000825235	0.00129275	-0.00679693	0.000190612	0.00209448	-0.000669895	-0.00443049	0.00927829	0.850282	0.918938
MA0738.1_HIC2	DC	-0.00142588	-0.0035981	-0.00495608	0.00296425	-0.00636941	0.00194451	-0.00679825	0.00590033	-0.0163938	0.859336	0.922991
MA0479.1_FOXH1	DC	0.00368437	5.77075e-05	0.000303902	-0.00382897	-0.00724572	0.0146646	-0.00508186	0.00397647	-0.000390253	0.883856	0.943502
MA0638.1_CREB3	DC	0.00178381	0.00607455	0.00230787	0.00350856	0.0100917	-0.00195973	3.071e-05	0.0165005	-0.0127321	0.889724	0.943976
MA0778.1_NFKB2	DC	-0.00758894	0.000803429	-0.00570431	-0.0095863	0.00375547	-0.00510066	-0.00324763	-0.00886026	-0.00366017	0.900413	0.949526
MA0098.3_ETS1	DC	0.000553618	0.000564671	-0.0051011	-0.00520266	-0.00468621	0.0110664	0.0026029	-0.00182379	-0.0140606	0.920277	0.963483
MA0649.1_HEY2	DC	-0.00189882	0.000221723	-0.000851189	-0.00615398	0.0012835	-0.00190182	0.00803029	0.00678417	-0.0156801	0.924722	0.963483
MA0596.1_SREBF2	DC	-0.000525838	0.000133753	0.00183038	0.00427386	-0.00118334	0.00276793	0.00818972	0.000493052	-0.000848963	0.93446	0.967833
MA0914.1_ISL2	DC	0.00548265	0.00537735	0.00253607	-0.00350743	0.0114783	-0.00682457	0.0119128	-0.00149675	0.000989859	0.944856	0.969349
MA0663.1_MLX	DC	0.00536507	0.00258087	0.00560791	-0.00320815	0.00920284	-0.0106631	0.00850612	0.00652599	0.00260467	0.949205	0.969349
MA0636.1_BHLHE41	DC	0.00130493	-0.00175654	0.00308753	-0.000949957	-0.00373031	0.002191	-0.00406104	0.00734943	0.00288103	0.952637	0.969349
MA0777.1_MYBL2	DC	0.00965873	0.0120649	0.0243198	-0.0116436	0.0215777	-0.00696086	-0.0165574	0.0602918	0.00960385	0.973565	0.984885
MA0160.1_NR4A2	DC	-0.000693652	-0.00223042	-0.00703996	0.00295586	0.00510445	-0.0169002	0.00265508	0.00445097	-0.0269094	0.987943	0.992625
MA0819.1_CLOCK	DC	0.00413756	-0.00224131	-0.00190917	-0.00239869	0.00260375	-0.0119314	-0.00432998	-0.00413298	0.00229915	0.992625	0.992625
MA0841.1_NFE2	DN2 B	0.0205766	0.00999549	-0.0594221	0.0166924	0.0347019	-0.0147109	-0.037491	-0.0613701	-0.0742396	0.00100813	0.127443	0.321267	0.000755718	0.0131208	0.321267	0.00226715	0.0196813
MA0476.1_FOS	DN2 B	0.0142815	0.0171011	-0.0672661	0.0470641	0.0493966	-0.0151944	-0.0253483	-0.0720711	-0.0940734	0.00283826	0.127443	0.814809	0.00507262	0.00450868	0.814809	0.00760893	0.00760893
MA0506.1_NRF1	DN2 B	-0.0160476	-0.0108958	0.0050307	-0.0108256	-0.0263984	0.00460669	0.00654604	0.00694292	0.00114134	0.00318491	0.127443	0.742986	0.000926612	0.044823	0.742986	0.00277984	0.0672345
MA0639.1_DBP	DN2 B	0.0386865	-0.0574334	0.00416457	-0.0116422	-0.0746486	-0.0402181	0.000528985	0.0180189	-0.012323	0.00377933	0.127443	0.000987248	0.16543	0.0107441	0.00296174	0.16543	0.0161162
MA0655.1_JDP2	DN2 B	0.0169499	0.0211576	-0.0669259	0.0209996	0.0424338	-0.000118625	-0.0214836	-0.06927	-0.099998	0.0043055	0.127443	0.480708	0.0035499	0.0191768	0.480708	0.0106497	0.0287652
MA0843.1_TEF	DN2 B	0.0331488	-0.040568	0.00244132	-0.0175198	-0.0526327	-0.0285033	-0.00545042	0.00863479	8.38541e-05	0.00910562	0.222276	0.00156314	0.350238	0.0191768	0.00468943	0.350238	0.0287652
MA0763.1_ETV3	DN2 B	-0.0108179	-0.0143243	0.0073936	-0.01287	-0.0295469	0.000898333	0.00614967	0.00461571	0.0122778	0.0114402	0.222276	0.888359	0.0117583	0.0191768	0.888359	0.0287652	0.0287652
MA0051.1_IRF2	DN2 B	-0.0195416	-0.0140111	0.00378366	-0.0125564	-0.0213932	-0.00662901	-0.00204147	0.00774729	0.00289469	0.0120149	0.222276	0.321267	0.00716325	0.0607447	0.321267	0.0214898	0.0911171
MA0028.2_ELK1	DN2 B	-0.0131301	-0.014377	0.00859523	-0.0149399	-0.0317386	0.00298454	0.00187345	0.0123895	0.0086606	0.0171193	0.270067	0.814809	0.021856	0.0191768	0.814809	0.032784	0.032784
MA0152.1_NFATC2	DN2 B	-0.0210276	0.0139585	0.00626704	-0.0173586	-0.00493847	0.0328555	0.0100633	0.00950877	-0.0013084	0.0182477	0.270067	0.0206499	0.00999708	1	0.0309749	0.0299912	1
MA0024.3_E2F1	DN2 B	-0.0205383	-0.00852224	0.0210419	0.012418	-0.0346844	0.01764	0.0230503	0.0254961	0.0131994	0.0209044	0.281259	0.541423	0.0161243	0.044823	0.541423	0.048373	0.0672345
MA0058.3_MAX	DN2 B	0.001126	0.0193016	-0.0183293	0.00325999	0.0236804	0.0149227	-0.00844016	-0.00888701	-0.0394598	0.0265513	0.327466	0.423447	0.0444532	0.0229703	0.423447	0.0666799	0.0666799
MA0641.1_ELF4	DN2 B	-0.0027485	-0.0154043	0.00394706	-0.0128153	-0.0292061	-0.00160245	4.45887e-05	0.00462349	0.00612203	0.0296077	0.330582	0.23587	0.294935	0.00566984	0.294935	0.294935	0.0170095
MA0478.1_FOSL2	DN2 B	0.0187812	0.00834424	-0.0614073	0.0429601	0.0355041	-0.0188157	-0.0276076	-0.0605172	-0.089693	0.0312713	0.330582	0.605841	0.0137894	0.105638	0.605841	0.0413683	0.158458
MA0076.2_ELK4	DN2 B	-0.00754081	-0.00594572	0.00535526	-0.0169102	-0.0185238	0.00663236	0.00643128	0.00352972	0.0070502	0.041427	0.40113	0.888359	0.0387902	0.044823	0.888359	0.0672345	0.0672345
MA0059.1_MAX::MYC	DN2 B	0.00634555	0.0152114	-0.0142139	-0.00114061	0.0181009	0.0123219	-0.00352073	-0.0151841	-0.0214103	0.0448419	0.40113	0.672974	0.0337522	0.0607447	0.672974	0.0911171	0.0911171
MA0729.1_RARA	DN2 B	-0.021919	0.00465631	-0.0141081	0.00926101	-0.00165064	0.0109633	-0.0291357	-0.00274607	-0.0179927	0.0461067	0.40113	0.0152201	0.245811	0.105638	0.0456602	0.245811	0.158458
MA0759.1_ELK3	DN2 B	-0.00597949	-0.0133803	0.00927797	-0.0144851	-0.0271583	0.000397737	0.00880977	0.00829518	0.0110284	0.0496191	0.40113	0.541423	0.133545	0.0191768	0.541423	0.200318	0.0575305
MA0636.1_BHLHE41	DN2 B	-0.0326654	-0.00515137	-0.00607774	-0.00786724	-0.00230544	-0.00799731	-0.00320799	0.00702032	-0.0267108	0.0514964	0.40113	0.074455	0.021856	0.833961	0.111682	0.065568	0.833961
MA0074.1_RXRA::VDR	DN2 B	-0.0258572	0.00852257	-0.00308288	0.00188282	0.0267272	-0.00968203	-0.00850463	-0.0145598	0.0173222	0.0568325	0.42056	0.0206499	0.0948979	0.350279	0.0619498	0.142347	0.350279
MA0796.1_TGIF1	DN2 B	0.0154088	0.00040697	-0.0182997	0.00859708	0.00914668	-0.00833274	-0.000351652	-0.0269744	-0.0205135	0.062225	0.427703	0.480708	0.0337522	0.135829	0.480708	0.101257	0.203743
MA0625.1_NFATC3	DN2 B	-0.0104017	0.0279395	0.0104487	-0.0107118	0.00635472	0.0495244	-0.00309039	0.0135168	0.0169847	0.0635775	0.427703	0.0592349	0.0337522	0.928439	0.0888523	0.0888523	0.928439
MA0163.1_PLAG1	DN2 B	-0.00490136	0.00743004	-0.00344428	-0.00249044	0.00819873	0.00666135	-0.000589786	-0.00265256	-0.00683628	0.0682077	0.438902	0.0359523	0.515008	0.0607447	0.0911171	0.515008	0.0911171
MA0825.1_MNT	DN2 B	0.00457255	0.00635756	-0.0191978	0.000262707	0.0204098	-0.00769472	-0.00860282	-0.0139816	-0.0349763	0.07295	0.449858	0.672974	0.0253356	0.214393	0.672974	0.0760068	0.32159
MA0139.1_CTCF	DN2 B	-0.00735616	-0.000320259	0.0319021	-0.0119754	-0.0188892	0.0182486	0.012792	0.0280604	0.0525686	0.0879063	0.470386	1	0.0444532	0.135829	1	0.13336	0.203743
MA0596.1_SREBF2	DN2 B	-0.000146102	0.0145157	-0.0172162	-0.0054275	-0.00744402	0.0364755	-0.00914841	-0.0184576	-0.0219323	0.0978292	0.470386	0.672974	0.106637	0.0702298	0.672974	0.159956	0.159956
MA0475.2_FLI1	DN2 B	-0.00902661	-0.0109116	0.00924252	-0.00999573	-0.0251585	0.00333535	0.012463	0.00496338	0.0126569	0.100959	0.470386
MA0758.1_E2F7	DN2 B	-0.0104225	0.000666714	0.0116214	-0.00641652	0.00988834	-0.00855491	0.0146964	0.00584637	0.0172463	0.101833	0.470386
MA0795.1_SMAD3	DN2 B	0.00575882	0.00830447	-0.0322606	-0.00813616	-0.0182628	0.0348717	-0.00725418	-0.0374906	-0.0449437	0.104313	0.470386
MA0501.1_MAF::NFE2	DN2 B	0.00228337	0.0067294	-0.0334354	0.0271137	-0.00695279	0.0204116	-0.0155398	-0.0267346	-0.057133	0.104507	0.470386
MA0685.1_SP4	DN2 B	-0.00734705	0.00392765	0.00159648	-0.0031871	-0.00124325	0.00909855	-0.0010294	0.00197291	0.00317017	0.106707	0.470386
MA0772.1_IRF7	DN2 B	-0.0273411	-0.0107392	0.00116589	-0.0230057	-0.032498	0.0110196	0.00486984	-0.000944996	0.00115796	0.107207	0.470386
MA0101.1_REL	DN2 B	-0.00579019	0.0210041	-0.0162197	0.0102411	0.0194605	0.0225477	-0.026275	0.00601763	-0.0393076	0.109164	0.470386
MA0511.2_RUNX2	DN2 B	0.010522	0.0339439	-0.011339	-0.0169755	0.0581268	0.009761	-0.0153193	-0.0067673	-0.0145552	0.111931	0.470386
MA0513.1_SMAD2::SMAD3::SMAD4	DN2 B	0.0090823	0.0103405	-0.00686677	0.0164996	0.0261499	-0.00546898	-0.0118317	-0.00303945	-0.00825305	0.120767	0.470386
MA0771.1_HSF4	DN2 B	0.00309294	0.0184493	-0.00568417	0.00421532	0.0128153	0.0240833	-0.00414131	-0.000317347	-0.014432	0.120888	0.470386
MA0112.3_ESR1	DN2 B	-0.0206554	0.0149766	-0.00546539	-0.0289016	0.0133407	0.0166124	0.017058	-0.00371968	-0.0259281	0.121486	0.470386
MA0794.1_PROX1	DN2 B	0.035716	-0.00948097	0.014918	-0.0135506	-0.0168868	-0.0020751	-0.00842721	0.0212179	0.0247742	0.127273	0.470386
MA0657.1_KLF13	DN2 B	-0.00202782	0.0171428	-0.0019495	0.00566134	0.0177852	0.0165005	0.00420514	-0.00520567	-0.00231456	0.130591	0.470386
MA0692.1_TFEB	DN2 B	-0.0154338	0.00341622	-0.00568001	-0.00461824	0.00498591	0.00184654	0.00469774	-0.00323464	-0.0174057	0.133137	0.470386
MA0694.1_ZBTB7B	DN2 B	-0.00352461	-0.011243	0.00620904	-0.0189377	-0.00857655	-0.0139095	0.0101687	0.00903529	-0.000915442	0.134264	0.470386
MA0595.1_SREBF1	DN2 B	0.0135116	0.0154848	-0.0149162	-0.0100895	-0.00997098	0.0409406	-0.00722268	-0.0117439	-0.0255123	0.138781	0.470386
MA0736.1_GLIS2	DN2 B	-0.00815627	0.0091979	-0.0062921	-0.0126986	0.0219253	-0.00352947	-0.00466951	-0.00956222	-0.00301202	0.142288	0.470386
MA0131.2_HINFP	DN2 B	-0.0150956	-0.00452814	0.00291623	-0.00810064	-0.0146842	0.00562792	0.0192951	0.00375782	-0.0113651	0.143104	0.470386
MA0653.1_IRF9	DN2 B	-0.0270048	-0.00687263	-0.000673467	-0.0161551	-0.0103859	-0.00335938	0.00599626	-0.00220041	-0.00387154	0.143104	0.470386
MA0258.2_ESR2	DN2 B	0.00222146	0.00436314	-0.013877	0.00870897	0.0165819	-0.00785566	-0.00550963	-0.0149014	-0.0191368	0.150758	0.470386
MA0727.1_NR3C2	DN2 B	-0.0322247	-0.0259509	0.00355349	0.00243914	-0.0502062	-0.00169564	0.0054085	-0.00052393	0.00777787	0.152588	0.470386
MA0107.1_RELA	DN2 B	-0.000586782	0.0276662	-0.0115101	0.0178604	0.0260494	0.029283	-0.0164696	0.00625269	-0.0324105	0.155471	0.470386
MA0724.1_VENTX	DN2 B	-0.0180101	0.0180844	-0.0104096	0.00443292	0.0212563	0.0149124	-0.0125645	-0.018491	0.00262828	0.161995	0.470386
MA0661.1_MEOX1	DN2 B	-0.0115683	-0.00243889	0.0241	0.00384038	-0.0123177	0.0074399	0.021716	0.0312062	0.0160586	0.164115	0.470386
MA0510.2_RFX5	DN2 B	0.0204267	-0.00636733	0.000452726	0.0126926	-0.0118308	-0.000903893	-0.0206199	0.00793899	0.00683007	0.164627	0.470386
MA0770.1_HSF2	DN2 B	-0.00648245	0.0208554	-0.0085451	0.0108698	0.00363977	0.0380711	-0.016498	0.000822702	-0.0152977	0.165271	0.470386
MA0095.2_YY1	DN2 B	-0.0102865	-0.00790235	0.00643078	-0.0192001	-0.0239557	0.00815099	-0.000314708	0.00812187	0.00945966	0.171632	0.479274
MA0113.3_NR3C1	DN2 B	-0.027339	-0.0286904	0.00377926	-0.000720194	-0.0473934	-0.00998738	-0.00278697	0.000355973	0.0138249	0.18405	0.493642
MA0488.1_JUN	DN2 B	0.00751026	-0.00334541	-0.00575068	0.00887459	0.00697908	-0.0136699	-0.000458561	0.000682312	-0.0189906	0.184426	0.493642
MA0754.1_CUX1	DN2 B	-0.0616817	-0.0187308	-0.00728834	0.0229204	-0.0120427	-0.0254189	-0.0138068	0.0212593	-0.0420404	0.189487	0.493642
MA0749.1_ZBED1	DN2 B	-0.0103691	0.0028697	0.0378547	0.00722099	-0.0497864	0.0555258	0.0304392	0.0632932	0.00817336	0.191966	0.493642
MA0472.2_EGR2	DN2 B	-0.00312438	0.0108556	-0.00231095	0.00581938	0.00892088	0.0127904	-0.00703709	-0.00296875	0.00239087	0.193454	0.493642
MA0523.1_TCF7L2	DN2 B	0.00795413	-0.0151645	0.00525917	-0.0194845	-0.0102789	-0.0200501	0.00332676	0.00602771	0.00572916	0.218846	0.548971
MA0073.1_RREB1	DN2 B	0.0030305	0.00162477	-0.0042039	0.000865362	0.00807941	-0.00482986	-0.00693077	-0.000837638	-0.00673517	0.230602	0.560683
MA0259.1_ARNT::HIF1A	DN2 B	0.00777528	-0.00719951	0.00152125	-0.00714092	0.00660429	-0.0210033	0.0120236	0.00740088	-0.0151121	0.231194	0.560683
MA0862.1_GMEB2	DN2 B	-0.0201157	0.000496632	0.00616964	0.0200874	-0.0403845	0.0413778	0.00624818	0.00781715	0.00380028	0.234881	0.560683
MA0698.1_ZBTB18	DN2 B	0.0121842	0.0045533	-0.00660496	0.00623436	0.00172572	0.00738088	0.0113785	-0.00435125	-0.0241469	0.239532	0.562709
MA0600.2_RFX2	DN2 B	0.0213198	-0.00491827	-0.00332423	0.0114085	-0.00305828	-0.00677825	-0.0313316	0.00687526	0.00480238	0.251454	0.581487
MA0599.1_KLF5	DN2 B	-0.00104003	0.00275755	7.78942e-05	-0.00198218	0.00407516	0.00143994	-0.00123616	0.000918095	-4.71466e-05	0.260087	0.587465
MA0777.1_MYBL2	DN2 B	-0.0237573	-0.0380869	-0.0031048	-0.0166401	-0.0290637	-0.0471101	-0.0128381	0.00336565	-0.0043768	0.262942	0.587465
MA0083.3_SRF	DN2 B	0.00879317	0.0234373	-0.00651427	-0.0112711	0.0596444	-0.0127698	-0.0212714	-0.00724841	0.00631922	0.265947	0.587465
MA0486.2_HSF1	DN2 B	-0.00172762	0.0211799	-0.00555517	0.00435624	0.0104892	0.0318705	-0.0205659	0.000646416	-0.00222883	0.279226	0.595117
MA0778.1_NFKB2	DN2 B	-0.0140261	0.0158446	-0.0175827	0.00479843	0.0229517	0.00873753	-0.0381795	0.0129358	-0.0438311	0.280212	0.595117
MA0875.1_BARX1	DN2 B	-0.00806838	-0.000791516	0.00659324	-0.0142592	0.0530595	-0.0546425	0.0183793	0.0107558	-0.00866329	0.281474	0.595117
MA0797.1_TGIF2	DN2 B	0.0173244	-0.0100694	-0.0129385	0.00281596	0.00592629	-0.0260651	-0.000448171	-0.0161856	-0.0183848	0.287464	0.599221
MA0497.1_MEF2C	DN2 B	-0.0113629	0.00161028	-0.000959231	-0.00946303	-0.00313303	0.00635359	0.0127679	-0.00505761	-0.00620318	0.294356	0.605065
MA0914.1_ISL2	DN2 B	0.00706321	0.0119873	0.00420931	-0.0154059	0.0307611	-0.00678662	-0.0100201	-0.00297174	0.0256464	0.304598	0.617541
MA0645.1_ETV6	DN2 B	0.00478959	-0.00587688	0.000725518	-0.00845689	-0.00651111	-0.00524264	-0.000911978	-0.00396253	0.00859879	0.309398	0.618795
MA0138.2_REST	DN2 B	-0.000841252	0.0116567	-0.00307961	-0.00978905	0.0171488	0.00616455	-0.00391838	-0.00253331	-0.00317341	0.320686	0.626981
MA0464.2_BHLHE40	DN2 B	-0.0198517	-0.0093823	-0.00389422	-0.00720988	0.0125206	-0.0312852	0.00563857	0.00808103	-0.0282858	0.323161	0.626981
MA0799.1_RFX4	DN2 B	0.0152956	-0.00410379	-0.00114925	0.00520889	0.00259158	-0.0107992	-0.0181348	0.00283098	0.00686688	0.326199	0.626981
MA0691.1_TFAP4	DN2 B	0.017441	0.0223553	0.00457801	-0.00949694	0.0384021	0.0063085	0.0071493	-0.00176142	0.0113962	0.334778	0.635219
MA0819.1_CLOCK	DN2 B	0.0106136	0.0257157	-0.0134367	-0.0216332	0.0490991	0.00233236	-0.0163501	-0.0129824	-0.0117421	0.343467	0.639129
MA0638.1_CREB3	DN2 B	0.00292633	-0.0112999	-0.0117563	-0.00792802	-0.00876491	-0.0138349	-0.00138678	-0.00837875	-0.0247805	0.345475	0.639129
MA0717.1_RAX2	DN2 B	0.00949725	-0.0174508	0.000204171	0.0464739	-0.0245578	-0.0103438	-0.0220061	-0.00140564	0.0202261	0.354126	0.647046
MA0786.1_POU3F1	DN2 B	-0.00438181	0.00759163	-0.0237567	0.0245714	-0.00736083	0.0225441	-0.0240945	-0.00447948	-0.0504746	0.373357	0.673864
MA0527.1_ZBTB33	DN2 B	-0.00099651	0.0056096	0.00563581	0.0197897	-0.00154643	0.0127656	0.00375248	0.00712766	0.00505387	0.385245	0.68619
MA0098.3_ETS1	DN2 B	-0.00430309	-0.00404017	0.00524894	-0.0148684	-0.012615	0.00453464	0.00601666	0.00361458	0.00692286	0.389459	0.68619
MA0144.2_STAT3	DN2 B	-0.00794982	-0.00235076	-0.00115203	-0.00968392	-0.02403	0.0193285	0.00152853	0.00204634	-0.00777421	0.405397	0.705867
MA0741.1_KLF16	DN2 B	-0.00106044	0.00604459	0.00238994	9.1286e-05	0.00804121	0.00404798	0.00135402	0.000298187	0.00614711	0.412565	0.709996
MA0760.1_ERF	DN2 B	-0.00374526	-0.00251458	0.00765111	-0.012108	-0.0104714	0.0054422	0.00775201	0.00581624	0.0101392	0.42905	0.711601
MA0663.1_MLX	DN2 B	-0.0237105	0.000185334	-0.00490725	-0.00892694	-0.008487	0.00885767	0.00300916	0.00396717	-0.0236646	0.436183	0.711601
MA0105.4_NFKB1	DN2 B	-0.0111051	0.0123415	-0.0206036	0.0147593	0.022656	0.00202701	-0.0280818	0.00400816	-0.0490776	0.438326	0.711601
MA0788.1_POU3F3	DN2 B	-0.00451676	0.000873715	-0.0233617	0.0135806	-0.0204585	0.0222059	-0.0192553	-0.00132495	-0.0574983	0.444028	0.711601
MA0634.1_ALX3	DN2 B	-0.0124663	-0.0220892	0.00267497	0.042638	0.0117414	-0.0559198	-0.0163556	0.0225362	-0.00990635	0.444869	0.711601
MA0115.1_NR1H2::RXRA	DN2 B	0.00600626	-0.00763911	0.00612549	-0.0286541	0.0026319	-0.0179101	-0.00221268	0.00449373	0.0150805	0.447703	0.711601
MA0652.1_IRF8	DN2 B	-0.0263617	-0.0195748	-0.0105087	-0.0247478	-0.02764	-0.0115096	-0.00488101	-0.00619807	-0.0210458	0.448053	0.711601
MA0466.2_CEBPB	DN2 B	0.0131245	-0.0257458	-0.00699238	-0.016378	-0.0429667	-0.00852489	0.0266064	-0.00646364	-0.0346116	0.451963	0.711601
MA0731.1_BCL6B	DN2 B	0.00649328	0.0168392	-0.00141105	0.00106573	0.00797807	0.0257003	0.00365566	0.000611011	-0.00829529	0.463797	0.722547
MA0670.1_NFIA	DN2 B	-0.00350871	0.00307324	0.00176706	0.0284999	0.00568709	0.000459386	0.00546623	-0.0044174	0.00746597	0.469202	0.723353
MA0800.1_EOMES	DN2 B	0.00107322	0.0191891	-0.00235943	-0.0109236	0.0489393	-0.0105611	0.00148849	0.00257639	-0.0123479	0.50015	0.763115
MA0153.2_HNF1B	DN2 B	0.002128	-0.0229091	-0.00592174	0.00690554	-0.0201336	-0.0256845	0.00364207	0.00459788	-0.0283003	0.514887	0.763138
MA0762.1_ETV2	DN2 B	-0.00140436	-0.00726698	0.00599184	-0.0176782	-0.00118919	-0.0133448	0.00736554	-0.00120602	0.0149699	0.515634	0.763138
MA0861.1_TP73	DN2 B	-0.00186631	0.00808493	-0.0088272	-0.00672726	0.036725	-0.0205551	0.0130439	-0.0103303	-0.0242197	0.515634	0.763138
MA0145.3_TFCP2	DN2 B	-0.0145148	0.00476724	-0.00408299	-0.0233346	0.000364652	0.00916983	-0.0253341	0.01601	-0.0152123	0.523564	0.767203
MA0050.2_IRF1	DN2 B	-0.0102798	-0.002458	-0.00481459	-0.00192902	-0.00627398	0.00135797	-0.000869023	-0.00275494	-0.0108546	0.542465	0.781697
MA0732.1_EGR3	DN2 B	-0.00118508	0.00455529	0.00133074	0.00777656	0.000794881	0.00831571	-0.00699586	0.00128477	0.00805639	0.544019	0.781697
MA0504.1_NR2C2	DN2 B	0.00638348	0.00236983	-0.00115849	0.00130114	0.0165363	-0.0117966	-0.00062851	-0.00229346	6.48108e-06	0.553269	0.787344
MA0838.1_CEBPG	DN2 B	-0.0120442	-0.00572618	-0.000817529	-0.025206	-0.0396507	0.0281984	0.0229969	0.00213197	-0.0239984	0.558885	0.787762
MA0837.1_CEBPE	DN2 B	0.0113416	-0.0232825	0.00243854	-0.0120534	-0.0470275	0.000462444	0.0252985	0.00154587	-0.0145997	0.572051	0.798713
MA0507.1_POU2F2	DN2 B	-0.0183184	-0.007327	-0.0273403	0.0287483	-0.0125868	-0.00206717	-0.0309891	-0.000794419	-0.0615856	0.588361	0.806812
MA0665.1_MSC	DN2 B	0.00808292	0.0067711	-3.28509e-05	0.00897159	0.0304196	-0.0168774	-0.0103662	0.000507598	0.00747719	0.588755	0.806812
MA0804.1_TBX19	DN2 B	0.0210662	0.00865016	0.00426563	-0.012194	0.00839218	0.00890814	-0.00897618	-0.01665	0.044141	0.620796	0.816596
MA0776.1_MYBL1	DN2 B	0.00375757	0.00732857	-0.00266586	0.00708925	0.0126208	0.00203637	0.0190147	-0.0319762	0.0210241	0.631539	0.816596
MA0674.1_NKX6-1	DN2 B	0.0209173	0.0118902	0.0304042	0.0282001	0.00957291	0.0142075	0.00897679	0.0298508	0.048321	0.633089	0.816596
MA0160.1_NR4A2	DN2 B	0.00626199	0.0128381	-0.0012485	0.00163419	0.00799995	0.0176762	-0.00692116	0.00602154	-0.00688841	0.638756	0.816596
MA0031.1_FOXD1	DN2 B	0.0104647	-0.00493553	0.00140828	0.00397501	0.0064117	-0.0162828	-0.0381058	0.0144349	0.0147823	0.643064	0.816596
MA0157.2_FOXO3	DN2 B	0.0104647	-0.00493553	0.00140828	0.00397501	0.0064117	-0.0162828	-0.0381058	0.0144349	0.0147823	0.643064	0.816596
MA0863.1_MTF1	DN2 B	0.00385395	-0.00310585	-0.00807235	-0.022343	0.00677132	-0.012983	-0.00234513	-0.000874519	-0.0227311	0.64347	0.816596
MA0773.1_MEF2D	DN2 B	-0.0232925	-0.00476148	-0.00859609	-0.0149973	-0.0160835	0.00656056	0.00793798	-0.0107892	-0.018753	0.644044	0.816596
MA0895.1_HMBOX1	DN2 B	-0.0122808	0.00546644	-0.00374319	-0.030999	0.0338789	-0.0229461	0.0103057	-0.00490805	-0.0133515	0.645553	0.816596
MA0738.1_HIC2	DN2 B	-0.00298147	-0.00407465	0.00302962	-0.00399203	1.13108e-05	-0.00816062	0.00729166	-0.00463921	0.0103564	0.657896	0.82286
MA0071.1_RORA	DN2 B	-0.00726214	0.00559576	0.00319348	0.00159757	-0.00282677	0.0140183	0.000878829	0.000713793	0.00851676	0.665933	0.82286
MA0106.3_TP53	DN2 B	0.00314927	-0.00973807	-0.00851032	0.00378174	0.0160105	-0.0354866	-0.0246226	-0.00305485	-0.00325812	0.672719	0.82286
MA0660.1_MEF2B	DN2 B	-0.0238789	-0.00225802	-0.00636286	-0.0125057	-0.0164048	0.0118888	0.0091596	-0.00925287	-0.0147348	0.672744	0.82286
MA0517.1_STAT1::STAT2	DN2 B	-0.0119194	-0.00191048	-0.00654214	-0.0026316	-0.00869467	0.00487372	-0.00121692	-0.00996974	-0.00600369	0.690564	0.831293
MA0801.1_MGA	DN2 B	-0.000722257	0.0053362	-0.0133467	-0.00274275	0.0291514	-0.018479	-0.0140221	-0.00535673	-0.0239923	0.690872	0.831293
MA0649.1_HEY2	DN2 B	-0.019707	-0.0155585	-0.00355635	-0.00577161	0.00126773	-0.0323847	0.00241717	0.00114792	-0.0149212	0.708251	0.845332
MA0130.1_ZNF354C	DN2 B	0.000550658	-0.00321932	0.00123206	-0.0036217	-0.00736349	0.000924844	0.00975944	-0.00101219	-0.00244788	0.7416	0.878054
MA0752.1_ZNF410	DN2 B	0.000693015	0.00636158	0.014214	0.0148925	0.0125495	0.000173665	-0.00294995	0.0119865	0.0310637	0.748434	0.879113
MA0894.1_HESX1	DN2 B	-0.00614672	-0.00194403	-0.0131302	0.00065287	-0.0052755	0.00138744	0.00570967	-0.0132123	-0.0280872	0.780364	0.908869
MA0768.1_LEF1	DN2 B	0.00704503	0.00202383	0.00022956	-0.0147297	-0.00404508	0.00809274	-0.00625491	0.00579758	-0.00237809	0.788287	0.908869
MA0637.1_CENPB	DN2 B	-0.0127636	0.0102745	-0.00816861	0.011104	-0.0146908	0.0352398	-0.015295	-0.00851854	-0.00197757	0.79219	0.908869
MA0844.1_XBP1	DN2 B	-0.00515294	-0.002836	-0.0100728	0.0019545	0.00384936	-0.00952135	0.00879231	-0.0140028	-0.0196628	0.813174	0.925767
MA0048.2_NHLH1	DN2 B	-0.00061599	0.00288367	0.00236834	0.00545054	0.0246143	-0.0188469	0.00138669	0.0026437	0.00276818	0.831249	0.934675
MA0855.1_RXRB	DN2 B	0.00325558	0.00244213	-0.000732603	-0.013664	0.0157172	-0.010833	-0.00506581	0.00180677	-0.000821149	0.833629	0.934675
MA0785.1_POU2F1	DN2 B	-0.0247599	-0.00938241	-0.0291726	0.0268576	-0.038471	0.0197062	-0.0213261	-0.00765797	-0.0655704	0.855742	0.952255
MA0088.2_ZNF143	DN2 B	0.00858422	0.0104333	0.00585178	-0.00962906	0.0054773	0.0153894	-0.00467257	0.0131047	0.00411715	0.866391	0.956909
MA0671.1_NFIX	DN2 B	0.00673561	0.00453179	0.00868689	0.0231172	-0.000547441	0.00961102	0.00908631	0.00573549	0.0124993	0.878377	0.962962
MA0834.1_ATF7	DN2 B	-0.00163758	-0.00966427	-0.00158483	-0.00486968	-0.0214532	0.0021247	-0.00255677	0.0118571	-0.0196261	0.886801	0.965048
MA0159.1_RARA::RXRA	DN2 B	-0.00347044	-0.00355736	-0.00437662	0.00778526	0.00878612	-0.0159009	-0.0024522	-0.00746173	-0.001597	0.897968	0.967539
MA0690.1_TBX21	DN2 B	-0.00101353	-0.00195728	-0.00556722	-0.00919055	0.025233	-0.0291475	-0.00635641	-0.0013403	-0.0108536	0.902783	0.967539
MA0903.1_HOXB3	DN2 B	0.018705	0.00565661	0.0150477	0.0325632	0.00516936	0.00614386	-0.00849422	0.0188317	0.0285837	0.909817	0.967539
MA0628.1_POU6F1	DN2 B	0.00109992	0.0117557	0.0117744	0.000778295	0.0184086	0.00510284	0.00945945	-0.0140591	0.0497933	0.915239	0.967539
MA0848.1_FOXO4	DN2 B	0.00286256	-0.00468717	0.00192747	0.00617198	-0.00341087	-0.00596347	-0.0228336	0.0101952	0.0101616	0.939692	0.979397
MA0849.1_FOXO6	DN2 B	0.00286256	-0.00468717	0.00192747	0.00617198	-0.00341087	-0.00596347	-0.0228336	0.0101952	0.0101616	0.939692	0.979397
MA0839.1_CREB3L1	DN2 B	-0.00390158	-0.000757539	-0.00173187	0.00504019	-0.00442739	0.00291231	0.0142774	0.00725573	-0.0271219	0.950114	0.983335
MA0668.1_NEUROD2	DN2 B	-0.0117843	-0.00693793	-0.00781162	-0.0130343	-0.00637796	-0.00749789	-0.0329628	-0.00811224	0.0127302	0.958086	0.984699
MA0597.1_THAP1	DN2 B	0.00376572	0.00446873	0.00215449	0.00336346	-0.00238452	0.011322	0.000812879	-0.00231513	0.00948523	0.968927	0.988604
MA0733.1_EGR4	DN2 B	0.00546539	0.00143875	0.00510601	0.00348005	0.00240254	0.000474961	-0.00504403	0.0039937	0.0147833	0.975245	0.988604
MA0137.3_STAT1	DN2 B	-0.00592556	-0.0013187	-0.0061342	-0.00605037	-0.0228474	0.02021	-0.00999467	-0.00278291	-0.00773762	0.983756	0.990449
MA0790.1_POU4F1	DN2 B	-0.00531255	-0.00623587	-0.00417145	-0.0365158	-0.00957897	-0.00289276	0.00226542	0.0020596	-0.0180444	0.999072	0.999072
MA0595.1_SREBF1	GZMK+ CD8+ T	-0.0120005	0.0213667	-0.00720179	-0.00861345	0.0216823	0.0207354	-0.00287229	-0.00901814	-0.00796903	0.00022646	0.0369549	0.00068426	0.327536	0.000431028	0.00102639	0.327536	0.00102639
MA0653.1_IRF9	GZMK+ CD8+ T	-0.0513067	0.00384243	0.0198264	-0.0559422	0.00685639	-0.0021855	0.0236621	0.00958721	0.029215	0.000900616	0.0369549	0.0602125	0.000122515	0.163063	0.0903188	0.000367546	0.163063
MA0050.2_IRF1	GZMK+ CD8+ T	-0.0167206	0.000670334	0.00659633	-0.0267743	0.00140444	-0.000797883	0.0092195	0.00285228	0.00921563	0.00092902	0.0369549	0.0160957	0.000330691	0.176836	0.0241435	0.000992074	0.176836
MA0772.1_IRF7	GZMK+ CD8+ T	-0.0362519	0.00565495	0.0156478	-0.04629	0.0106384	-0.00431198	0.0242845	0.00548402	0.0217478	0.000947452	0.0369549	0.0443138	0.000183568	0.150115	0.0664707	0.000550704	0.150115
MA0517.1_STAT1::STAT2	GZMK+ CD8+ T	-0.027879	0.00173859	0.00787762	-0.0266894	0.00440838	-0.003601	0.00909423	0.00480568	0.0106505	0.00105585	0.0369549	0.0377971	0.000183568	0.206948	0.0566956	0.000550704	0.206948
MA0066.1_PPARG	GZMK+ CD8+ T	-0.0116297	0.0140419	-0.00436285	-0.00842274	0.00923352	0.0236588	-0.00297379	-0.00267823	-0.00725428	0.00283538	0.066281	0.00216857	0.152437	0.0123542	0.00650571	0.152437	0.0185313
MA0652.1_IRF8	GZMK+ CD8+ T	-0.0521533	-0.00418438	0.0229678	-0.0663553	0.00113866	-0.0148305	0.0334354	0.00887577	0.0324299	0.00285889	0.066281	0.176462	0.000483798	0.106041	0.176462	0.00145139	0.159061
MA0051.1_IRF2	GZMK+ CD8+ T	-0.0349548	-0.00513269	0.0135558	-0.0393451	-0.00452628	-0.0063455	0.0144822	0.00783763	0.0196094	0.00302999	0.066281	0.176462	0.000483798	0.115958	0.176462	0.00145139	0.173938
MA0724.1_VENTX	GZMK+ CD8+ T	-0.0309221	-0.00370783	0.013231	0.0108839	-0.0102298	0.00933603	0.0144616	0.00117707	0.0264736	0.00343945	0.0668782	0.0377971	0.00201581	0.0968083	0.0566956	0.00604743	0.0968083
MA0523.1_TCF7L2	GZMK+ CD8+ T	0.0456478	0.00607293	-0.0170954	0.0418946	0.014441	-0.0106632	-0.0118554	-0.0125209	-0.0259255	0.00455226	0.0762537	0.106206	0.000840983	0.191457	0.159309	0.00252295	0.191457
MA0152.1_NFATC2	GZMK+ CD8+ T	-0.0103107	-0.00710171	0.00346728	-0.0126981	-0.00964214	-0.00202084	0.00232294	0.00584535	0.00145575	0.00479309	0.0762537	0.488718	0.00388867	0.0158088	0.488718	0.011666	0.0237132
MA0513.1_SMAD2::SMAD3::SMAD4	GZMK+ CD8+ T	0.00155198	0.0178714	-0.0080695	0.0070894	0.0134357	0.0267429	-0.0119407	-0.0045621	-0.00958069	0.00621752	0.0851123	0.106206	0.706491	0.000705386	0.159309	0.706491	0.00211616
MA0768.1_LEF1	GZMK+ CD8+ T	0.0342479	0.00616466	-0.0175838	0.0228702	0.0122928	-0.00609171	-0.0130275	-0.0148335	-0.02383	0.00632263	0.0851123	0.137913	0.00170045	0.126591	0.137913	0.00510136	0.137913
MA0112.3_ESR1	GZMK+ CD8+ T	-0.00682551	0.0109064	0.000875691	-0.0136579	0.0127665	0.00718625	0.00262703	-0.000692768	0.001538	0.00733738	0.0917172	0.00919942	0.0668543	0.028387	0.0275983	0.0668543	0.0425804
MA0507.1_POU2F2	GZMK+ CD8+ T	-0.0120783	-0.0209899	-0.000564512	-0.000346241	-0.0253454	-0.0122789	-0.00792002	-0.00257038	0.00667933	0.00822751	0.0959877	0.176462	0.466589	0.000970591	0.264693	0.466589	0.00291177
MA0657.1_KLF13	GZMK+ CD8+ T	-0.00857861	-0.00333554	0.00554745	0.00124387	-0.000280883	-0.00944485	0.000304248	0.00583532	0.00870707	0.0104047	0.113801	0.276605	0.00388867	0.0729138	0.276605	0.011666	0.109371
MA0895.1_HMBOX1	GZMK+ CD8+ T	-0.0176068	-0.0158429	0.00800792	-0.00589006	-0.0198791	-0.00777042	0.0219326	0.00157657	0.00622804	0.0129357	0.128769	0.921212	0.0148849	0.0158088	0.921212	0.0237132	0.0237132
MA0073.1_RREB1	GZMK+ CD8+ T	-0.00426666	0.00889787	-0.00150082	-0.00544552	0.0103666	0.00596031	0.000992098	-0.00506133	0.000991162	0.0134305	0.128769	0.0271799	0.633368	0.006464	0.0407698	0.633368	0.019392
MA0822.1_HES7	GZMK+ CD8+ T	-0.0154272	0.00630939	0.000653226	-0.0168253	0.00486476	0.00919865	0.00503232	0.000467615	-0.00204962	0.0139807	0.128769	0.0192424	0.0289535	0.0882301	0.0434302	0.0434302	0.0882301
MA0625.1_NFATC3	GZMK+ CD8+ T	-0.01055	-0.00210627	0.00778141	-0.020006	-0.001985	-0.00234881	0.00181516	0.00900912	0.0103266	0.0173533	0.151842	0.448279	0.00532584	0.0882301	0.448279	0.0159775	0.132345
MA0634.1_ALX3	GZMK+ CD8+ T	0.0053231	-0.018716	-0.000311913	-0.00615845	-0.0159954	-0.0241573	0.00030483	-0.00424886	0.00387003	0.0296047	0.240472	0.0517542	0.238029	0.0200859	0.0776313	0.238029	0.0602577
MA0685.1_SP4	GZMK+ CD8+ T	-0.00377105	-0.000596973	0.00226884	-0.00061992	0.00340983	-0.00861059	0.00360842	0.00119201	0.00263208	0.0302308	0.240472	0.198516	0.0112259	0.176836	0.198516	0.0336777	0.198516
MA0903.1_HOXB3	GZMK+ CD8+ T	-0.00823388	-0.0181789	0.00187608	-0.000164303	-0.0240959	-0.00634482	0.00194825	-0.00339804	0.00798111	0.0317879	0.241865	0.276605	0.379581	0.006464	0.379581	0.379581	0.019392
MA0698.1_ZBTB18	GZMK+ CD8+ T	0.00223007	0.00334065	-0.00880708	-0.00519363	-0.00629964	0.0226212	-0.00762862	-0.00827901	-0.0102088	0.0347529	0.244992	0.869066	0.0668543	0.0178353	0.869066	0.100282	0.0535059
MA0795.1_SMAD3	GZMK+ CD8+ T	-0.0097643	0.013514	-0.0143941	0.0236759	-0.00225571	0.0450533	-0.0217432	-0.0150057	-0.00878102	0.0363365	0.244992	0.0697861	0.563662	0.0139876	0.104679	0.563662	0.0419628
MA0773.1_MEF2D	GZMK+ CD8+ T	-0.0115159	0.0073435	0.00149657	-0.0155414	0.00620408	0.00962236	0.00399152	-0.000331306	0.00196579	0.0389905	0.244992	0.0271799	0.0746771	0.176836	0.0815397	0.112016	0.176836
MA0137.3_STAT1	GZMK+ CD8+ T	-0.00572412	0.00786272	0.00388867	-0.00304983	0.0107496	0.00208891	0.00378028	0.00605754	0.00143057	0.0390975	0.244992	0.0271799	0.0532274	0.258831	0.0798411	0.0798411	0.258831
MA0846.1_FOXC2	GZMK+ CD8+ T	-0.00519091	-0.00201467	0.00212866	-0.00768272	-0.0024142	-0.00121562	0.00468754	0.00181563	0.000787939	0.0391988	0.244992	0.198516	0.00532584	0.673998	0.297774	0.0159775	0.673998
MA0844.1_XBP1	GZMK+ CD8+ T	-0.00281399	0.0127069	-0.00657966	0.00699118	0.0168848	0.00435102	-0.00531961	-0.00612261	-0.00795292	0.0417965	0.25222	0.106206	0.633368	0.0139876	0.159309	0.633368	0.0419628
MA0105.4_NFKB1	GZMK+ CD8+ T	0.00529563	0.0136433	-0.0113835	0.012079	0.011742	0.0174461	-0.0119563	-0.0150621	-0.0067099	0.0464152	0.270755	0.575157	0.11374	0.0200859	0.575157	0.17061	0.0602577
MA0758.1_E2F7	GZMK+ CD8+ T	-0.00475903	-0.0112116	0.00526206	-0.00226892	-0.00887726	-0.0158804	0.00460288	0.0047106	0.00634487	0.0501265	0.282972	0.575157	0.0746771	0.0317443	0.575157	0.112016	0.0952328
MA0786.1_POU3F1	GZMK+ CD8+ T	-0.016485	-0.0208616	-0.0026635	-0.00192231	-0.0236147	-0.0153553	-0.00775476	-0.010738	0.0101509	0.057272	0.31219	0.766679	0.125672	0.0225805	0.766679	0.188508	0.0677416
MA0113.3_NR3C1	GZMK+ CD8+ T	-0.0146094	-0.00382182	-0.00371881	-0.00163373	0.00195164	-0.0153688	-0.00715543	0.00327388	-0.00958587	0.0588702	0.31219	0.0321142	0.0473361	0.70663	0.0710041	0.0710041	0.70663
MA0837.1_CEBPE	GZMK+ CD8+ T	-0.021823	0.0125654	-0.00113257	-0.0216281	0.0124804	0.0127356	-0.0086522	0.00276846	-0.000670684	0.0633897	0.325256	0.0697861	0.0328502	0.438391	0.104679	0.0985505	0.438391
MA0497.1_MEF2C	GZMK+ CD8+ T	-0.00733492	0.00416254	-0.000940601	-0.0159163	0.00224311	0.0080014	0.00301777	-0.0048962	0.00103535	0.0650513	0.325256	0.0517542	0.327536	0.0661139	0.0991708	0.327536	0.0991708
MA0755.1_CUX2	GZMK+ CD8+ T	-0.0196354	-0.0169972	0.00862199	-0.0222251	-0.0204717	-0.0100483	0.0134627	0.00783107	0.0063176	0.0710943	0.345597	0.973699	0.0473361	0.0729138	0.973699	0.109371	0.109371
MA0596.1_SREBF2	GZMK+ CD8+ T	-0.0150657	0.00626247	-0.00207671	-0.00568673	0.00119135	0.0164047	-0.000582795	-0.00564652	0.00109213	0.0746464	0.349013	0.0805752	0.0668543	0.206948	0.120863	0.120863	0.206948
MA0107.1_RELA	GZMK+ CD8+ T	0.0121062	0.00789301	-0.0108971	-0.000396276	0.00225222	0.0191746	-0.0164544	-0.0104896	-0.00766768	0.080873	0.349013	0.973699	0.0532274	0.0802756	0.973699	0.120413	0.120413
MA0843.1_TEF	GZMK+ CD8+ T	0.0040345	0.00481892	-0.0145316	0.00312433	0.00951873	-0.0045807	-0.0138486	-0.011588	-0.018421	0.0828678	0.349013	0.766679	0.11374	0.0439283	0.766679	0.17061	0.131785
MA0031.1_FOXD1	GZMK+ CD8+ T	-0.0179396	0.00261899	-0.000504881	-0.00992605	0.00535359	-0.00285021	-0.00210286	0.00377298	-0.0044304	0.0846985	0.349013	0.0805752	0.042003	0.579915	0.120863	0.120863	0.579915
MA0593.1_FOXP2	GZMK+ CD8+ T	-0.0141417	0.0049253	0.00221758	-0.0124979	0.00568508	0.00340575	-0.00159252	0.00285691	0.00401175	0.0846985	0.349013	0.0443138	0.0668543	0.70663	0.100282	0.100282	0.70663
MA0157.2_FOXO3	GZMK+ CD8+ T	-0.0179396	0.00261899	-0.000504881	-0.00992605	0.00535359	-0.00285021	-0.00210286	0.00377298	-0.0044304	0.0846985	0.349013	0.0805752	0.042003	0.579915	0.120863	0.120863	0.579915
MA0660.1_MEF2B	GZMK+ CD8+ T	-0.014676	0.0034139	0.00119694	-0.0149888	-0.00372532	0.0176924	0.0057545	0.000669945	-0.00122662	0.0857574	0.349013	0.121251	0.0289535	0.520827	0.181876	0.0868604	0.520827
MA0788.1_POU3F3	GZMK+ CD8+ T	-0.0100595	-0.0152118	-0.00239001	-0.00431928	-0.0186823	-0.00827089	-0.00405982	-0.0114726	0.00931957	0.0933578	0.356054	0.409811	0.466589	0.0225805	0.466589	0.466589	0.0677416
MA0527.1_ZBTB33	GZMK+ CD8+ T	-0.00320897	-0.00752324	0.00176383	-0.0071481	-0.00914234	-0.00428503	0.00290002	-0.000920409	0.00413799	0.0935798	0.356054	0.339021	0.563662	0.0225805	0.508531	0.563662	0.0677416
MA0074.1_RXRA::VDR	GZMK+ CD8+ T	-0.011249	-0.00388	-0.00126367	-0.00608716	-0.000212911	-0.0112142	0.00122227	-0.000830082	-0.00342682	0.0940893	0.356054	0.198516	0.0195566	0.982336	0.297774	0.0586697	0.982336
MA0778.1_NFKB2	GZMK+ CD8+ T	0.0118615	0.0186347	-0.00741312	-0.00527929	0.0249354	0.0060333	-0.0105221	-0.0129887	0.00116441	0.0956259	0.356054	0.620928	0.183335	0.039489	0.620928	0.275003	0.118467
MA0690.1_TBX21	GZMK+ CD8+ T	-0.0397535	-0.00817333	0.000252148	-0.0581734	-0.0206631	0.0168063	0.00932422	0.00197779	-0.00780914	0.09835	0.358568	0.276605	0.0223399	0.579915	0.414907	0.0670197	0.579915
MA0488.1_JUN	GZMK+ CD8+ T	-0.00797828	0.00952757	-0.00210039	-0.00551725	0.0060928	0.0163971	-0.00631587	0.00120156	-0.00314234	0.102816	0.359871
MA0140.2_GATA1::TAL1	GZMK+ CD8+ T	0.00428174	0.0141839	-0.00121873	-0.00811808	0.0160584	0.0104348	0.000585731	-0.00463059	0.0015588	0.103095	0.359871
MA0083.3_SRF	GZMK+ CD8+ T	0.00877806	-0.00917851	-0.00266902	-0.024187	-0.0102401	-0.00705536	-0.00284045	-0.0015828	-0.00382199	0.104877	0.359871
MA0131.2_HINFP	GZMK+ CD8+ T	-0.00426887	-0.00710337	-0.000663059	-0.00950298	-0.00731956	-0.00667099	0.00212361	0.00172871	-0.00531124	0.109494	0.362518
MA0058.3_MAX	GZMK+ CD8+ T	-0.00586817	0.00565228	-0.00114386	-0.00345736	0.00426356	0.00842971	-0.00121982	0.00130701	-0.00395255	0.109791	0.362518
MA0800.1_EOMES	GZMK+ CD8+ T	-0.0349032	-0.0155042	0.000203872	-0.0616791	-0.0312502	0.0159877	0.0121108	0.000324219	-0.00787452	0.112141	0.363264
MA0668.1_NEUROD2	GZMK+ CD8+ T	-0.0144362	-0.0141881	-0.0013484	-0.0269484	-0.0104764	-0.0216113	-0.0213785	-0.00176408	0.0124899	0.114169	0.363264
MA0666.1_MSX1	GZMK+ CD8+ T	-0.0131249	-0.00375659	0.0040571	0.00427701	-0.0047658	-0.00173817	0.00431694	0.00438865	0.00349706	0.119146	0.372333
MA0095.2_YY1	GZMK+ CD8+ T	-0.00457467	-0.0119283	0.00314547	-0.0125571	-0.0136531	-0.00847887	0.00427909	0.00607836	-0.00103197	0.124253	0.381479
MA0785.1_POU2F1	GZMK+ CD8+ T	-0.0124055	-0.0218782	-0.0064037	0.00209092	-0.0252732	-0.0150883	-0.00859967	-0.0175946	0.00811627	0.130748	0.394498
[truncated: 8,423 more rows]
