# Supplementary material for: Infants display reduced NK cell responses in RSV and increased inflammatory responses in SARS-CoV-2 infections
Source: Research Square preprint supplement (doi:10.21203/rs.3.rs-5640872/v1), 2025-01-13
Supplement: Supplementary file 4 [file 4f0a7823730b7196cfbca66d.xlsx]

## Sheet: Index
Sheet Name	Description
Summary	Summary of the number of DORC genes and the total number of peaks for each PBMC subset with DORCs
CD14+ Monocyte	CD14+ Monocyte DORCs (Peaks, DORC Genes, rObs, P-Value); DORC Treshold=8peaks
CD16+ Monocyte	CD16+ Monocyte DORCs (Peaks, DORC Genes, rObs, P-Value); DORC Treshold=8peaks
CD56dim NK	CD56dim NK DORCs (Peaks, DORC Genes, rObs, P-Value); DORC Treshold=8peaks
Naive CD8+ T	Naive CD8+ T DORCs (Peaks, DORC Genes, rObs, P-Value); DORC Treshold=8peaks
CD8+ GZMK+ T	CD8+ GZMK+ T DORCs (Peaks, DORC Genes, rObs, P-Value); DORC Treshold=8peaks
CD8+ TEMRA	CD8+ TEMRA DORCs (Peaks, DORC Genes, rObs, P-Value); DORC Treshold=8peaks
MAIT	MAIT DORCs (Peaks, DORC Genes, rObs, P-Value); DORC Treshold=8peaks
Naive CD4+ T	Naive CD4+ T DORCs (Peaks, DORC Genes, rObs, P-Value); DORC Treshold=8peaks
Naive B	Naive B DORCs (Peaks, DORC Genes, rObs, P-Value); DORC Treshold=8peaks
TrB	TrB DORCs (Peaks, DORC Genes, rObs, P-Value); DORC Treshold=8peaks

## Sheet: Summary
Cell Type	# of DORC Genes	# of Peaks
CD14+ Monocyte	87	943
CD16+ Monocyte	19	189
CD56dim NK	15	137
Naive CD8+ T	35	357
CD8+ GZMK+ T	3	26
CD8+ TEMRA	2	21
MAIT	1	8
Naive CD4+ T	82	865
Naive B	32	319
TrB	21	212

## Sheet: CD14+ Monocyte
PeakRanges	Gene	rObs	pvalZ
chr1:983922-984552	ISG15	0.0498524	0.0180959
chr1:993375-994201	ISG15	0.0695671	5.96e-05
chr1:994743-994935	ISG15	0.0642776	1.47e-05
chr1:997155-997405	ISG15	0.060554	0.00088784
chr1:999162-999408	ISG15	0.0634064	0.0031076
chr1:999684-1001166	ISG15	0.167968	7.4e-06
chr1:1009179-1009586	ISG15	0.095642	2.27e-06
chr1:1012964-1013929	ISG15	0.0828341	0.00049527
chr1:1032403-1033544	ISG15	0.0708948	0.0177438
chr1:1038473-1039203	ISG15	0.0606282	0.0051309
chr1:1039654-1041196	ISG15	0.0966167	0.00117336
chr1:1050226-1050944	ISG15	0.0298237	0.0329945
chr1:1053038-1053386	ISG15	0.0252633	0.0481749
chr1:2199051-2199746	SKI	0.0263696	0.03121
chr1:2231991-2232215	SKI	0.0443594	0.00032237
chr1:2239953-2241029	SKI	0.0294841	0.00997496
chr1:2265897-2266603	SKI	0.0235032	0.0160329
chr1:2269338-2271182	SKI	0.0351757	0.00988516
chr1:2271840-2272180	SKI	0.023893	0.0070007
chr1:2275020-2275271	SKI	0.0206962	0.023983
chr1:2275588-2277015	SKI	0.0288587	0.0163321
chr1:2278001-2278529	SKI	0.0309008	0.00107263
chr1:78617432-78617997	IFI44L	0.0597023	0.00343032
chr1:78619466-78620961	IFI44L	0.089623	7.91e-08
chr1:78622585-78623147	IFI44L	0.0473592	0.00233328
chr1:78623649-78624290	IFI44L	0.049295	0.00400514
chr1:78626746-78627503	IFI44L	0.0373983	0.0133785
chr1:78633003-78633533	IFI44L	0.0333161	0.0267062
chr1:78648318-78648627	IFI44L	0.0668718	0.00059513
chr1:78649527-78649950	IFI44L	0.0482306	0.0152453
chr1:78655782-78656015	IFI44L	0.0437722	0.00192213
chr1:78664919-78665259	IFI44L	0.0429016	0.00297563
chr1:78665959-78666223	IFI44L	0.0443358	0.00082924
chr1:153355549-153355876	S100A9	0.0331798	0.0218718
chr1:153357048-153358513	S100A9	0.109972	1.21e-05
chr1:153361029-153361260	S100A9	0.0421987	0.00120517
chr1:153365216-153365808	S100A9	0.10832	5.06e-07
chr1:153367222-153367564	S100A9	0.0333344	0.0160109
chr1:153375241-153376148	S100A9	0.0530402	0.0084772
chr1:153386330-153387122	S100A9	0.0399178	0.0314575
chr1:153390069-153391554	S100A9	0.0725116	0.00095301
chr1:156076066-156077269	LMNA	0.0512324	0.014803
chr1:156096354-156097752	LMNA	0.134453	7.18e-06
chr1:156103142-156103483	LMNA	0.0983779	0.00053457
chr1:156104009-156104586	LMNA	0.151771	0.00011941
chr1:156106016-156106896	LMNA	0.158268	6.24e-09
chr1:156113963-156115146	LMNA	0.227595	0
chr1:156119649-156120402	LMNA	0.0898118	0.00568346
chr1:156123488-156124118	LMNA	0.0805498	0.0124223
chr1:156126164-156127590	LMNA	0.151316	2.43e-08
chr1:156130195-156130572	LMNA	0.0702936	0.0432861
chr1:212521999-212522438	ATF3	0.0363091	0.0314518
chr1:212532096-212533253	ATF3	0.074031	0.0012131
chr1:212545942-212546470	ATF3	0.069887	0.0302835
chr1:212566163-212567521	ATF3	0.0977257	0.0327352
chr1:212595528-212596981	ATF3	0.0774637	0.0125848
chr1:212606928-212607217	ATF3	0.071059	0.0486577
chr1:212607498-212609756	ATF3	0.127032	3.64e-05
chr1:212614083-212615109	ATF3	0.0661108	0.0275717
chr1:247385109-247385519	NLRP3	0.0269933	0.00728353
chr1:247420999-247421496	NLRP3	0.0353899	0.00942018
chr1:247426978-247428730	NLRP3	0.0280484	0.016251
chr1:247434960-247435684	NLRP3	0.0458376	0.0275291
chr1:247440010-247440728	NLRP3	0.0608043	0.00270926
chr1:247445613-247446500	NLRP3	0.0570409	0.00546156
chr1:247451212-247452065	NLRP3	0.046393	0.00066728
chr1:247453983-247454419	NLRP3	0.0377304	0.00121342
chr1:24890696-24891265	RUNX3	0.0240459	0.0325354
chr1:24891976-24892390	RUNX3	0.0221251	0.0311161
chr1:24892846-24893256	RUNX3	0.0270822	0.00868121
chr1:24897240-24900628	RUNX3	0.0686131	0.00035139
chr1:24903894-24904422	RUNX3	0.0269379	0.0223208
chr1:24909411-24910106	RUNX3	0.0324982	0.029676
chr1:24910858-24911725	RUNX3	0.0510886	0.00048836
chr1:24916339-24916613	RUNX3	0.0436151	7.14e-05
chr1:24921036-24921870	RUNX3	0.0390015	0.0032635
chr1:24923117-24923898	RUNX3	0.0369079	0.00604914
chr1:24928823-24930858	RUNX3	0.0617684	0.00024537
chr1:24939248-24939961	RUNX3	0.0342709	6.78e-05
chr1:24949559-24949776	RUNX3	0.0181005	0.0181396
chr1:24954932-24955783	RUNX3	0.0482416	0.00725956
chr1:24956943-24957445	RUNX3	0.0352334	0.00624499
chr1:30723830-30724409	LAPTM5	0.0300463	0.0110081
chr1:30730077-30730999	LAPTM5	0.0430996	0.00569747
chr1:30731511-30732177	LAPTM5	0.0615037	3.19e-05
chr1:30732368-30733100	LAPTM5	0.0464039	0.00941646
chr1:30740610-30742603	LAPTM5	0.0410847	0.0120645
chr1:30743561-30743960	LAPTM5	0.0322625	0.00998138
chr1:30745827-30746498	LAPTM5	0.0319339	0.0486228
chr1:30747311-30749039	LAPTM5	0.0423463	0.0439396
chr1:30754720-30755121	LAPTM5	0.0417319	0.0101722
chr1:30768785-30769575	LAPTM5	0.0413305	0.00029005
chr1:30773141-30773690	LAPTM5	0.0190875	0.0342747
chr1:185284510-185285398	IVNS1ABP	0.018701	0.0460217
chr1:185297744-185298273	IVNS1ABP	0.0199904	0.0268229
chr1:185300886-185301679	IVNS1ABP	0.0345673	0.00027982
chr1:185303787-185304509	IVNS1ABP	0.0246666	0.0121723
chr1:185316046-185318178	IVNS1ABP	0.0305512	0.00624971
chr1:185324201-185324809	IVNS1ABP	0.0311801	0.0003143
chr1:185328045-185328717	IVNS1ABP	0.0189266	0.0405251
chr1:185337062-185337648	IVNS1ABP	0.0229712	0.0248036
chr2:144472379-144474559	ZEB2-AS1	0.0191255	0.0191459
chr2:144492905-144493798	ZEB2-AS1	0.0295826	0.0284905
chr2:144496665-144497333	ZEB2-AS1	0.0310814	0.00640408
chr2:144510373-144510955	ZEB2-AS1	0.0316571	0.00579154
chr2:144512935-144513128	ZEB2-AS1	0.0235558	0.0280255
chr2:144513754-144514010	ZEB2-AS1	0.0357225	0.00632732
chr2:144515716-144517954	ZEB2-AS1	0.0462019	0.00051403
chr2:144519945-144520435	ZEB2-AS1	0.0296846	0.0462386
chr2:144546965-144547584	ZEB2-AS1	0.0224804	0.00554983
chr2:241763050-241764589	NEU4	0.0509795	0.00015338
chr2:241798094-241798556	NEU4	0.0268683	0.00613522
chr2:241803230-241805243	NEU4	0.102842	2e-09
chr2:241813354-241814230	NEU4	0.0771026	1.19e-07
chr2:241817190-241818012	NEU4	0.0841809	3.06e-10
chr2:241818946-241819456	NEU4	0.066814	4.9e-08
chr2:241821703-241821955	NEU4	0.0386355	0.00030162
chr2:241842641-241843603	NEU4	0.0653446	4.57e-05
chr2:241850725-241850987	NEU4	0.0544599	6.52e-06
chr2:241852524-241854919	NEU4	0.104993	0
chr2:9481830-9482083	ADAM17	0.0245438	0.0153317
chr2:9483236-9484709	ADAM17	0.0564224	2.65e-07
chr2:9485050-9485975	ADAM17	0.0429822	0.00031102
chr2:9486889-9488104	ADAM17	0.0509773	4.95e-06
chr2:9491529-9492015	ADAM17	0.0329508	0.00235094
chr2:9493133-9493343	ADAM17	0.0338162	0.00069711
chr2:9496474-9497646	ADAM17	0.0441351	0.00027423
chr2:9501308-9501582	ADAM17	0.0283671	0.00722142
chr2:9502071-9504111	ADAM17	0.0326552	0.00350794
chr2:9504637-9504972	ADAM17	0.0173504	0.0237855
chr2:9507832-9508143	ADAM17	0.0216562	0.030409
chr2:9508828-9509557	ADAM17	0.032538	0.00120098
chr2:9511192-9511416	ADAM17	0.0247549	0.0205884
chr2:9512362-9513472	ADAM17	0.0425497	0.00143046
chr2:9514763-9515825	ADAM17	0.0226451	0.0238565
chr2:9518985-9520144	ADAM17	0.0275073	0.0212692
chr2:9524263-9524714	ADAM17	0.0283317	0.00537639
chr2:9525213-9525867	ADAM17	0.0218829	0.0169605
chr2:9548328-9548935	ADAM17	0.0478061	0.00045386
chr2:9552494-9552847	ADAM17	0.0375756	0.00997643
chr2:96103164-96104899	DUSP2	0.048115	0.0414864
chr2:96110362-96110629	DUSP2	0.0374246	0.00278692
chr2:96110878-96111133	DUSP2	0.0412459	0.00076004
chr2:96116203-96117756	DUSP2	0.0723552	0.0316029
chr2:96122188-96123921	DUSP2	0.091488	0.00037449
chr2:96124498-96125280	DUSP2	0.0684903	0.00050564
chr2:96130059-96130792	DUSP2	0.0598643	0.00068167
chr2:96132010-96132207	DUSP2	0.0580579	2.68e-06
chr2:96132834-96133095	DUSP2	0.0532197	9.34e-05
chr2:96134340-96135346	DUSP2	0.0789327	0.0002985
chr2:96135976-96136901	DUSP2	0.0843461	3.13e-05
chr2:96137687-96138363	DUSP2	0.0623325	0.00134402
chr2:96144976-96146654	DUSP2	0.106115	6.13e-06
chr2:96148462-96148987	DUSP2	0.0721026	0.0436946
chr2:96157458-96158453	DUSP2	0.103346	0.00136702
chr2:112799120-112799959	IL1B	0.118749	0.00054808
chr2:112821363-112822634	IL1B	0.0791295	0.00021031
chr2:112827157-112829652	IL1B	0.216869	6.88e-15
chr2:112830101-112830572	IL1B	0.113518	0.00011072
chr2:112831406-112832433	IL1B	0.143182	6.2e-05
chr2:112833413-112833709	IL1B	0.0997363	0.00047506
chr2:112836456-112837116	IL1B	0.133957	0.00088284
chr2:112879609-112880423	IL1B	0.0718482	0.00710281
chr2:127049932-127052181	BIN1	0.0354285	0.0440595
chr2:127059287-127059500	BIN1	0.0307613	0.0033255
chr2:127066763-127067364	BIN1	0.0522731	0.00095451
chr2:127080639-127081589	BIN1	0.0509744	0.00029131
chr2:127081861-127082250	BIN1	0.034449	0.00959839
chr2:127084855-127085990	BIN1	0.0519497	0.0002379
chr2:127086644-127087712	BIN1	0.0610851	0.00020262
chr2:127105750-127107860	BIN1	0.0496427	0.00257846
chr2:190964114-190964747	STAT1	0.0287468	0.0142924
chr2:190974618-190974866	STAT1	0.0248989	0.020081
chr2:190978291-190979002	STAT1	0.0277258	0.00859336
chr2:190979659-190980594	STAT1	0.0397083	0.00068053
chr2:190982481-190983049	STAT1	0.0176295	0.0340381
chr2:190984583-190986800	STAT1	0.0661939	4.66e-07
chr2:190999155-190999373	STAT1	0.0392927	0.00019588
chr2:191003236-191004686	STAT1	0.0282864	0.0169405
chr2:191005454-191006064	STAT1	0.0198404	0.0422802
chr2:191006257-191007154	STAT1	0.0453791	3.12e-05
chr2:191020242-191021421	STAT1	0.0332294	0.0425721
chr2:191056317-191056621	STAT1	0.0166356	0.0439717
chr2:229249680-229249946	PID1	0.0306283	0.0054483
chr2:229253550-229254488	PID1	0.0375631	0.0125917
chr2:229255717-229256108	PID1	0.0437384	0.0016141
chr2:229257068-229257550	PID1	0.0315855	0.046646
chr2:229257899-229258855	PID1	0.0506693	0.00700973
chr2:229263983-229264896	PID1	0.0475123	0.00260727
chr2:229267060-229267562	PID1	0.0408716	0.0490332
chr2:229270602-229271497	PID1	0.0843638	0.00011744
chr3:4977032-4979725	BHLHE40	0.0884979	0.00248519
chr3:4983932-4984435	BHLHE40	0.149978	4.12e-08
chr3:4986329-4987295	BHLHE40	0.120952	9.76e-08
chr3:4990121-4990561	BHLHE40	0.0365344	0.0493829
chr3:4994364-4995130	BHLHE40	0.0588573	0.00942671
chr3:5006571-5007274	BHLHE40	0.0844471	0.00248869
chr3:5011471-5013830	BHLHE40	0.119697	3.2e-05
chr3:5016635-5017079	BHLHE40	0.0535185	0.0461558
chr3:5019555-5020617	BHLHE40	0.0595164	0.0300668
chr3:5026171-5027295	BHLHE40	0.0752642	0.00914245
chr3:41159916-41160110	CTNNB1	0.0184182	0.0184412
chr3:41200788-41201000	CTNNB1	0.0275929	0.0307941
chr3:41207185-41208012	CTNNB1	0.0231344	0.0285232
chr3:41212568-41213496	CTNNB1	0.0280522	0.00532196
chr3:41214000-41214320	CTNNB1	0.0176794	0.044707
chr3:41222742-41223126	CTNNB1	0.0198412	0.0298101
chr3:41237208-41237566	CTNNB1	0.0195671	0.0307354
chr3:41238780-41239717	CTNNB1	0.02526	0.0162192
chr3:41241732-41245536	CTNNB1	0.037754	0.00786869
chr3:150372493-150373065	TSC22D2	0.0392129	0.00111754
chr3:150373300-150373959	TSC22D2	0.0217291	0.0414508
chr3:150384621-150385873	TSC22D2	0.0510409	0.0181314
chr3:150407976-150410435	TSC22D2	0.0459543	0.0109166
chr3:150427111-150427578	TSC22D2	0.0237369	0.0234579
chr3:150427895-150430751	TSC22D2	0.0475295	0.00168226
chr3:150437476-150437713	TSC22D2	0.029433	0.0028721
chr3:150441499-150441984	TSC22D2	0.0324444	0.00215851
chr3:150442463-150443789	TSC22D2	0.05082	8.96e-06
chr3:150447525-150448413	TSC22D2	0.0304373	0.00199615
chr3:156685163-156685970	TIPARP	0.0344283	0.00098056
chr3:156689547-156690034	TIPARP	0.0211776	0.0183873
chr3:156693335-156693773	TIPARP	0.0353533	6.49e-05
chr3:156698251-156698474	TIPARP	0.0353534	0.00035358
chr3:156698875-156699296	TIPARP	0.0400972	0.00030136
chr3:156707666-156707876	TIPARP	0.0315773	0.00200019
chr3:156714237-156714568	TIPARP	0.020309	0.0399766
chr3:156715736-156716448	TIPARP	0.0350032	0.00056581
chr3:156717108-156717733	TIPARP	0.0369557	6.34e-05
chr3:156718395-156719372	TIPARP	0.0346304	0.00017554
chr3:156721726-156722546	TIPARP	0.0243808	0.0145341
chr3:156723032-156723539	TIPARP	0.0314171	0.00055815
chr3:170330446-170331698	SKIL	0.034458	0.00447676
chr3:170356144-170358556	SKIL	0.0713323	0.0017499
chr3:170363471-170364612	SKIL	0.0597426	6.13e-06
chr3:170365634-170366033	SKIL	0.0386261	0.00999578
chr3:170366483-170366682	SKIL	0.0318899	0.00295711
chr3:170367251-170367569	SKIL	0.0414849	0.00010537
chr3:170371251-170371914	SKIL	0.0342148	0.00168033
chr3:170376237-170377327	SKIL	0.0405229	8.33e-05
chr3:170377939-170378447	SKIL	0.0270199	0.00498637
chr3:170379024-170379341	SKIL	0.0185736	0.0422103
chr3:170380757-170381105	SKIL	0.0310151	0.00548847
chr3:170386014-170386720	SKIL	0.0328669	0.00753171
chr3:170387558-170388578	SKIL	0.0316167	0.0133491
chr3:170391259-170391524	SKIL	0.0231673	0.0319313
chr3:170397637-170397851	SKIL	0.0206672	0.0299472
chr3:15719749-15720112	ANKRD28	0.0207456	0.0098078
chr3:15732866-15733277	ANKRD28	0.0262627	0.0149222
chr3:15738350-15738915	ANKRD28	0.0361063	0.00086421
chr3:15741807-15742496	ANKRD28	0.0201055	0.0256488
chr3:15743522-15744054	ANKRD28	0.0304913	0.00421431
chr3:15752919-15754031	ANKRD28	0.0254386	0.0140153
chr3:15754233-15754528	ANKRD28	0.0309063	0.00437716
chr3:15756548-15756891	ANKRD28	0.0289376	0.00406995
chr3:15763183-15763804	ANKRD28	0.02732	0.0119455
chr3:15768602-15769290	ANKRD28	0.0283504	0.0373774
chr3:15774902-15776149	ANKRD28	0.0639847	5.73e-07
chr3:15777049-15779156	ANKRD28	0.0555878	0.00018118
chr3:15781756-15782009	ANKRD28	0.020443	0.0432667
chr3:15783535-15784460	ANKRD28	0.0355825	0.00070966
chr3:15787188-15788123	ANKRD28	0.0343626	0.00185034
chr3:15797171-15798264	ANKRD28	0.0410111	0.0300075
chr4:73712403-73712602	CXCL8	0.0183638	0.0265126
chr4:73721509-73721918	CXCL8	0.0141274	0.0475132
chr4:73740400-73740800	CXCL8	0.110849	8.92e-13
chr4:73744325-73744551	CXCL8	0.0684993	8.2e-08
chr4:73744745-73745793	CXCL8	0.0794701	1.55e-12
chr4:73746519-73746859	CXCL8	0.0368235	5.22e-05
chr4:73747276-73747466	CXCL8	0.0353136	0.00046509
chr4:73776394-73776652	CXCL8	0.0203194	0.0109065
chr4:81410636-81411112	RASGEF1B	0.0430193	0.00271033
chr4:81413037-81413763	RASGEF1B	0.0669039	3.31e-06
chr4:81428977-81429303	RASGEF1B	0.0324596	0.041073
chr4:81434937-81436060	RASGEF1B	0.0279811	0.0486038
chr4:81438315-81439059	RASGEF1B	0.0322254	0.0202476
chr4:81439491-81439681	RASGEF1B	0.0406349	0.00023336
chr4:81441573-81442125	RASGEF1B	0.0247233	0.0250859
chr4:81443073-81444131	RASGEF1B	0.0314218	0.0156509
chr4:81447865-81449569	RASGEF1B	0.0606087	0.00144889
chr4:81450401-81450786	RASGEF1B	0.0309233	0.0425263
chr4:81451950-81452321	RASGEF1B	0.0392696	0.012273
chr4:81453648-81454002	RASGEF1B	0.0289383	0.0494083
chr4:81454450-81456143	RASGEF1B	0.0632516	0.00051257
chr4:81460066-81461407	RASGEF1B	0.0757051	0.00024613
chr4:81461594-81462088	RASGEF1B	0.0520624	0.00065945
chr4:81463917-81464249	RASGEF1B	0.0415157	0.00216442
chr4:81464463-81465012	RASGEF1B	0.0458585	0.0269532
chr4:81470387-81472601	RASGEF1B	0.0632813	0.00615555
chr4:81493996-81494543	RASGEF1B	0.052083	0.0223299
chr4:81504565-81506114	RASGEF1B	0.0658533	0.039465
chr5:83471198-83471964	VCAN	0.00800933	0.0393645
chr5:83497945-83498384	VCAN	0.0152939	0.0364462
chr5:83503643-83503895	VCAN	0.0243744	0.0151781
chr5:83504914-83506998	VCAN	0.0316574	0.00506359
chr5:83512108-83512730	VCAN	0.0279515	0.00708863
chr5:83518437-83518928	VCAN	0.0390968	0.00097403
chr5:83519402-83519746	VCAN	0.0232838	0.0337794
chr5:83520483-83522801	VCAN	0.0297458	0.0149703
chr5:139635756-139636479	CXXC5	0.0385313	0.0322597
chr5:139637040-139638665	CXXC5	0.0651868	7.5e-05
chr5:139646877-139647442	CXXC5	0.0433484	0.00306935
chr5:139648107-139650554	CXXC5	0.0584749	0.00111871
chr5:139651877-139653057	CXXC5	0.0615984	0.00041188
chr5:139667926-139668698	CXXC5	0.0441654	0.0289014
chr5:139669751-139671021	CXXC5	0.0458437	0.00430465
chr5:139687039-139687605	CXXC5	0.0337413	0.0122245
chr5:139689624-139690875	CXXC5	0.0331687	0.0324191
chr5:150372300-150373204	CD74	0.0498311	0.0468583
chr5:150383022-150384545	CD74	0.0766839	0.0476499
chr5:150385388-150387497	CD74	0.101562	0.0281075
chr5:150387870-150388325	CD74	0.0651844	0.0268602
chr5:150389429-150390181	CD74	0.106494	0.00196815
chr5:150391046-150392179	CD74	0.0921059	0.00979571
chr5:150392645-150392918	CD74	0.0766098	0.00093147
chr5:150393233-150393602	CD74	0.0983181	8.38e-05
chr5:150393926-150394644	CD74	0.105848	0.00246028
chr5:150397868-150400144	CD74	0.161938	6.2e-08
chr5:150400489-150401514	CD74	0.117007	0.00740228
chr5:150404813-150405024	CD74	0.0577726	0.0411617
chr5:150406973-150407525	CD74	0.0932839	0.00256045
chr5:150412261-150413360	CD74	0.118793	0.00081726
chr5:150419516-150420190	CD74	0.0502917	0.0354014
chr5:150429326-150430149	CD74	0.109202	0.00068731
chr5:170248475-170249205	LCP2	0.0228364	0.00226186
chr5:170249461-170250146	LCP2	0.038711	5.63e-05
chr5:170253958-170254821	LCP2	0.0334612	0.00059956
chr5:170255835-170257635	LCP2	0.0434229	0.00017865
chr5:170259274-170260616	LCP2	0.0287258	0.00337008
chr5:170262309-170262805	LCP2	0.0226112	0.0179663
chr5:170267955-170268171	LCP2	0.0263507	0.0250167
chr5:170333180-170333575	LCP2	0.0333784	0.0102763
chr6:14102472-14102677	CD83	0.0272303	0.00885492
chr6:14108663-14109664	CD83	0.0656866	0.0498378
chr6:14117346-14118246	CD83	0.0809226	0.0137317
chr6:14129069-14131699	CD83	0.0786164	0.00232146
chr6:14131921-14133483	CD83	0.0793423	0.00190896
chr6:14134112-14134888	CD83	0.0566152	0.0204741
chr6:14135274-14135484	CD83	0.0417731	0.0179312
chr6:14135893-14136514	CD83	0.0565589	0.0173268
chr6:14137035-14138711	CD83	0.119908	1.33e-07
chr6:14139394-14139796	CD83	0.0666696	5.94e-05
chr6:32405067-32405387	HLA-DRA	0.0292799	0.0485128
chr6:32439432-32440265	HLA-DRA	0.127503	0.00051367
chr6:32445083-32445843	HLA-DRA	0.107428	1.68e-05
chr6:32446167-32446628	HLA-DRA	0.0616072	0.00090907
chr6:32452264-32453062	HLA-DRA	0.0485823	0.0499511
chr6:32453528-32453950	HLA-DRA	0.0365253	0.0405609
chr6:32462623-32463022	HLA-DRA	0.0418085	0.0322055
chr6:32472790-32474132	HLA-DRA	0.123049	0.00017545
chr6:32482138-32482639	HLA-DRA	0.0459109	0.00280817
chr6:36678380-36679621	CDKN1A	0.130682	6.72e-06
chr6:36679959-36680773	CDKN1A	0.0546695	0.044314
chr6:36682865-36683153	CDKN1A	0.0877008	0.00870859
chr6:36685521-36686709	CDKN1A	0.0812077	0.0174065
chr6:36688156-36688420	CDKN1A	0.103003	2.67e-08
chr6:36688746-36688934	CDKN1A	0.0835457	1.29e-06
chr6:36717387-36718636	CDKN1A	0.0304088	0.046586
chr6:36720477-36721041	CDKN1A	0.0322047	0.0195596
chr6:43724773-43725853	VEGFA	0.0416296	0.0373967
chr6:43769413-43772182	VEGFA	0.055371	0.00081242
chr6:43780001-43780350	VEGFA	0.0238317	0.0243511
chr6:43781091-43781652	VEGFA	0.035696	0.00184665
chr6:43782352-43783403	VEGFA	0.0662118	8.31e-07
chr6:43787349-43787921	VEGFA	0.0711169	5e-08
chr6:43796925-43797316	VEGFA	0.0511287	0.00041732
chr6:43798571-43800326	VEGFA	0.0662011	0.00124777
chr6:43813189-43813530	VEGFA	0.0188111	0.0470588
chr6:43962510-43963016	C6orf223	0.0316349	0.00085371
chr6:43966627-43967493	C6orf223	0.0226682	0.0402123
chr6:43977247-43979128	C6orf223	0.0297123	0.0189642
chr6:44000254-44000869	C6orf223	0.0344452	0.029038
chr6:44002342-44003681	C6orf223	0.044623	8.26e-05
chr6:44024541-44025017	C6orf223	0.0237935	0.0198909
chr6:44042689-44043322	C6orf223	0.0308105	0.00119041
chr6:44044488-44045154	C6orf223	0.0209357	0.0168957
chr6:44049184-44049633	C6orf223	0.0416962	0.00025023
chr6:137817139-137817642	TNFAIP3	0.035539	0.00312352
chr6:137823832-137824784	TNFAIP3	0.04924	0.0159573
chr6:137861613-137861904	TNFAIP3	0.019979	0.0418665
chr6:137873214-137873761	TNFAIP3	0.076264	0.00216022
chr6:137877830-137878649	TNFAIP3	0.0327103	0.0309449
chr6:137880757-137881942	TNFAIP3	0.0674338	0.00020973
chr6:137882408-137882938	TNFAIP3	0.0432408	0.00280034
chr6:137883399-137883853	TNFAIP3	0.0635922	0.0011143
chr6:30735772-30736149	IER3	0.0408963	0.0113998
chr6:30737024-30737815	IER3	0.0669469	0.0010129
chr6:30742190-30743439	IER3	0.0790814	0.00139196
chr6:30743763-30744781	IER3	0.148521	1.16e-05
chr6:30752228-30753082	IER3	0.0705389	0.0188507
chr6:30755631-30756024	IER3	0.0419926	0.0195229
chr6:30764186-30764509	IER3	0.0233215	0.0175889
chr6:30776493-30776732	IER3	0.0301883	0.0131418
chr6:30779124-30779479	IER3	0.0446961	0.0456854
chr6:30787973-30788431	IER3	0.0651558	0.00737273
chr6:30788747-30789175	IER3	0.0442952	0.0314202
chr6:30793486-30794420	IER3	0.0563676	0.0352206
chr6:32489746-32490560	HLA-DRB5	0.0637091	7.63e-06
chr6:32491784-32492152	HLA-DRB5	0.0812571	3.81e-11
chr6:32518187-32518477	HLA-DRB5	0.0315249	0.00770137
chr6:32521490-32522272	HLA-DRB5	0.0481421	0.00029601
chr6:32523686-32523985	HLA-DRB5	0.0274773	0.0227399
chr6:32524347-32524832	HLA-DRB5	0.0254502	0.0381052
chr6:32529699-32530802	HLA-DRB5	0.114724	4.82e-11
chr6:32536413-32537034	HLA-DRB5	0.0355967	0.0186769
chr6:32539780-32539973	HLA-DRB5	0.0265013	0.0099719
chr6:32560423-32560760	HLA-DRB5	0.0411697	0.00074969
chr6:32567905-32569050	HLA-DRB5	0.0779642	9.4e-09
chr6:32551359-32551931	HLA-DRB1	0.0504346	0.0246283
chr6:32553887-32554767	HLA-DRB1	0.0353967	0.0439913
chr6:32574913-32575125	HLA-DRB1	0.0382497	0.0264098
chr6:32576211-32576691	HLA-DRB1	0.0668727	0.00018009
chr6:32577355-32577991	HLA-DRB1	0.0901895	4.15e-05
chr6:32578438-32579318	HLA-DRB1	0.0750811	0.00912558
chr6:32580458-32580882	HLA-DRB1	0.0513577	0.0233424
chr6:32581650-32581886	HLA-DRB1	0.0517449	0.0154778
chr6:32586072-32586597	HLA-DRB1	0.099255	0.00298778
chr6:32589095-32590307	HLA-DRB1	0.141704	0.0017084
chr6:32603960-32604963	HLA-DRB1	0.128531	0.00030595
chr6:32609518-32610418	HLA-DRB1	0.106237	0.0125773
chr6:32615980-32617123	HLA-DRB1	0.0746731	0.00107258
chr6:32622366-32623375	HLA-DRB1	0.100018	0.0380939
chr6:159645510-159645781	SOD2	0.0144644	0.0416256
chr6:159646205-159646520	SOD2	0.0184385	0.0171439
chr6:159660571-159661067	SOD2	0.0193068	0.0171288
chr6:159662006-159662401	SOD2	0.0183115	0.028381
chr6:159676300-159676577	SOD2	0.025494	0.00097789
chr6:159676879-159678480	SOD2	0.0599764	3.59e-05
chr6:159681021-159681930	SOD2	0.0425497	0.00013432
chr6:159683053-159683498	SOD2	0.0322064	0.00332327
chr6:159692590-159694570	SOD2	0.0519982	0.00052434
chr6:159700350-159700854	SOD2	0.0267356	0.00142302
chr6:159710675-159711944	SOD2	0.0155077	0.0136904
chr6:159739110-159739805	SOD2	0.0194047	0.00812083
chr7:155280985-155281580	INSIG1	0.0325332	0.00765389
chr7:155282442-155283308	INSIG1	0.0465302	0.0019016
chr7:155287162-155287736	INSIG1	0.0353308	0.00182775
chr7:155290961-155291609	INSIG1	0.0447053	0.0074102
chr7:155296919-155298314	INSIG1	0.0260221	0.0480197
chr7:155306403-155307264	INSIG1	0.043892	0.00085353
chr7:155307458-155307673	INSIG1	0.0219889	0.0366379
chr7:155310460-155311520	INSIG1	0.0440185	0.00011469
chr7:155312229-155313947	INSIG1	0.0499688	1.87e-05
chr7:155317004-155317372	INSIG1	0.0269097	0.0125505
chr7:1916025-1916746	MAD1L1	0.0522199	5.63e-05
chr7:1919621-1920701	MAD1L1	0.0315991	0.0419605
chr7:1922128-1922852	MAD1L1	0.038322	0.001285
chr7:1930201-1931110	MAD1L1	0.0222147	0.0119294
chr7:1931854-1932228	MAD1L1	0.0189378	0.0323935
chr7:1946140-1946799	MAD1L1	0.0331173	0.00230149
chr7:1949294-1949714	MAD1L1	0.0338428	0.00199533
chr7:1950163-1950434	MAD1L1	0.0258287	0.0277807
chr7:1950940-1951823	MAD1L1	0.0344756	0.0153949
chr7:44954824-44955414	SNHG15	0.0384386	0.0163618
chr7:44956058-44956427	SNHG15	0.0361444	0.00421499
chr7:44958957-44960647	SNHG15	0.0645887	0.00762291
chr7:44961824-44963259	SNHG15	0.0630876	0.00248835
chr7:44964528-44965474	SNHG15	0.0565587	0.00411622
chr7:44969424-44969740	SNHG15	0.0307774	0.0394584
chr7:44971558-44972076	SNHG15	0.0446991	0.00252757
chr7:44977123-44978180	SNHG15	0.0687087	0.0157862
chr7:44978657-44979372	SNHG15	0.0918026	0.00071035
chr7:44980350-44981251	SNHG15	0.0819292	0.00360652
chr7:45013481-45013783	SNHG15	0.0326788	0.00349983
chr7:45036069-45036966	SNHG15	0.0267459	0.0473434
chr7:106241066-106241863	NAMPT	0.0226536	0.00701231
chr7:106246891-106249032	NAMPT	0.0821942	6.74e-06
chr7:106249525-106249784	NAMPT	0.0253267	0.00102703
chr7:106253207-106255287	NAMPT	0.0456132	0.00644188
chr7:106256676-106258606	NAMPT	0.0317042	0.00229013
chr7:106258804-106261128	NAMPT	0.0280345	0.0157108
chr7:106266878-106267090	NAMPT	0.014088	0.00691569
chr7:106267950-106269843	NAMPT	0.00852231	0.0494438
chr7:106270471-106271285	NAMPT	0.0240137	0.00369254
chr7:106275766-106276145	NAMPT	0.0127661	0.0360838
chr7:106278098-106278897	NAMPT	0.0280751	0.00049223
chr7:130872391-130872983	LINC-PINT	0.0173593	0.036594
chr7:130874106-130874735	LINC-PINT	0.0187437	0.0203516
chr7:130884564-130885308	LINC-PINT	0.0227435	0.0135909
chr7:130887553-130888246	LINC-PINT	0.0214828	0.0167812
chr7:130935596-130936162	LINC-PINT	0.0206257	0.0334354
chr7:130936440-130936772	LINC-PINT	0.0216865	0.0170508
chr7:130950878-130952025	LINC-PINT	0.0193046	0.0417293
chr7:130960004-130961626	LINC-PINT	0.0392898	0.0112838
chr9:73151538-73152017	ANXA1	0.045458	0.0117209
chr9:73153849-73155129	ANXA1	0.0438567	0.0316828
chr9:73157407-73158434	ANXA1	0.0369946	0.00773319
chr9:73165646-73167961	ANXA1	0.053269	0.00168428
chr9:73168310-73169072	ANXA1	0.0406725	0.00412864
chr9:73171866-73173371	ANXA1	0.0479891	0.00142157
chr9:73173707-73174475	ANXA1	0.0645187	4e-06
chr9:73176371-73176803	ANXA1	0.0311204	0.0130063
chr9:73199949-73200144	ANXA1	0.0312715	0.00885996
chr9:99820845-99822262	NR4A3	0.0587062	0.014339
chr9:99833815-99834144	NR4A3	0.0270057	0.0265805
chr9:99834401-99835882	NR4A3	0.0468663	0.00049962
chr9:99836288-99836808	NR4A3	0.0442286	0.00022759
chr9:99840096-99840689	NR4A3	0.0271348	0.0154235
chr9:99841117-99841751	NR4A3	0.0310733	0.0355246
chr9:99842358-99843194	NR4A3	0.0308898	0.0187352
chr9:99843386-99843992	NR4A3	0.0507683	2.52e-05
chr9:99844194-99844792	NR4A3	0.0450552	0.00017728
chr9:99845855-99846178	NR4A3	0.03123	0.00371146
chr9:99846691-99847248	NR4A3	0.0388171	0.0008892
chr9:99848696-99849093	NR4A3	0.0460429	0.00039716
chr9:99849528-99853001	NR4A3	0.0681494	7.17e-06
chr9:99855618-99856051	NR4A3	0.0395542	0.00049578
chr9:99856492-99856682	NR4A3	0.040172	0.00077048
chr9:99859489-99859781	NR4A3	0.037732	0.00307721
chr9:99866502-99866696	NR4A3	0.0533798	3.41e-06
chr9:99867692-99868241	NR4A3	0.0444878	4.06e-05
chr9:126804670-126806223	ZBTB43	0.0452086	0.0434463
chr9:126811713-126812012	ZBTB43	0.0306795	0.0048499
chr9:126812871-126813639	ZBTB43	0.0405535	0.00010492
chr9:126820392-126821003	ZBTB43	0.0258808	0.0104964
chr9:126821517-126822916	ZBTB43	0.0390593	0.00013483
chr9:126825586-126826441	ZBTB43	0.034088	0.00036414
chr9:126827134-126827931	ZBTB43	0.0461321	6.89e-05
chr9:126828991-126829211	ZBTB43	0.0173248	0.0431259
chr9:126830362-126831428	ZBTB43	0.0303241	0.00292405
chr9:126834805-126835212	ZBTB43	0.027468	0.0128188
chr9:126836781-126837809	ZBTB43	0.0387967	0.00116502
chr9:133091361-133091569	RALGDS	0.0231749	0.00607541
chr9:133095134-133095447	RALGDS	0.0207221	0.032034
chr9:133098055-133098637	RALGDS	0.0470495	0.00456766
chr9:133112271-133114259	RALGDS	0.0515028	0.00612584
chr9:133114814-133115110	RALGDS	0.0548531	0.00883377
chr9:133120929-133122253	RALGDS	0.0451493	0.0278083
chr9:133133442-133134396	RALGDS	0.0491472	0.0405542
chr9:133135301-133135752	RALGDS	0.0349811	0.0262856
chr9:133147485-133147955	RALGDS	0.0530004	0.0225967
chr10:69012615-69013633	SRGN	0.0295642	0.0276639
chr10:69014197-69014611	SRGN	0.0247171	0.0263017
chr10:69054081-69054537	SRGN	0.0481798	0.0141619
chr10:69065411-69066351	SRGN	0.0714467	0.00782027
chr10:69087502-69088613	SRGN	0.0589466	0.0123068
chr10:69089663-69091172	SRGN	0.0435337	0.0249743
chr10:69096115-69097048	SRGN	0.0351175	0.0280098
chr10:69099428-69099653	SRGN	0.0497362	0.00110439
chr10:69100612-69102216	SRGN	0.0493825	0.0295796
chr10:69105140-69108159	SRGN	0.105515	1.34e-05
chr10:79298646-79299130	PPIF	0.0767743	0.0276971
chr10:79304216-79304944	PPIF	0.0873853	8.27e-10
chr10:79306285-79307283	PPIF	0.0396332	0.040343
chr10:79307829-79310340	PPIF	0.0753751	0.00036521
chr10:79311375-79312382	PPIF	0.0593835	0.0039698
chr10:79316811-79318301	PPIF	0.109928	4.54e-05
chr10:79322957-79323680	PPIF	0.0737413	0.0150393
chr10:79328844-79329122	PPIF	0.0641304	0.00875459
chr10:79337818-79338559	PPIF	0.033332	0.0187703
chr10:79345013-79345703	PPIF	0.0589814	0.0375906
chr10:79347270-79348463	PPIF	0.0603438	0.019142
chr10:79352885-79354520	PPIF	0.0835631	0.00760799
chr10:79354851-79355064	PPIF	0.0772068	3.49e-05
chr10:79355485-79356592	PPIF	0.128095	2.85e-09
chr10:79359868-79360181	PPIF	0.0423084	0.0125446
chr10:79367023-79367337	PPIF	0.0374592	0.00059523
chr10:79375637-79375920	PPIF	0.0293813	0.0131039
chr10:79388513-79389074	PPIF	0.0345447	0.00773924
chr11:61922276-61923017	FTH1	0.0614345	0.0466122
chr11:61923278-61923657	FTH1	0.0467187	0.00772332
chr11:61954735-61956085	FTH1	0.082344	0.041062
chr11:61966996-61968470	FTH1	0.0948519	0.00560161
chr11:61971675-61972145	FTH1	0.142851	0.00015224
chr11:61972538-61973213	FTH1	0.0964133	0.0108889
chr11:61982024-61982833	FTH1	0.0404514	0.0326984
chr11:62004248-62006088	FTH1	0.0909221	0.0135282
chr11:62010983-62012105	FTH1	0.0437534	0.0151266
chr12:52005534-52008070	NR4A1	0.14237	5.88e-10
chr12:52013353-52013578	NR4A1	0.056163	0.00045741
chr12:52013941-52014272	NR4A1	0.055053	0.00069966
chr12:52020473-52021090	NR4A1	0.0832491	0.0259049
chr12:52023025-52024116	NR4A1	0.0938382	0.00583556
chr12:52038639-52038874	NR4A1	0.0560914	0.00028854
chr12:52045344-52046323	NR4A1	0.0890761	0.00322274
chr12:52050387-52051859	NR4A1	0.101642	0.00012031
chr12:52056508-52057696	NR4A1	0.0601396	0.0184908
chr12:52058762-52059224	NR4A1	0.0507941	0.00156301
chr12:52059669-52060861	NR4A1	0.0799435	7.35e-05
chr12:52062356-52062780	NR4A1	0.0352134	0.0290242
chr12:52064242-52064430	NR4A1	0.0345972	0.0283067
chr12:68602625-68603181	RAP1B	0.0198315	0.0048338
chr12:68617653-68618140	RAP1B	0.0172102	0.00563598
chr12:68626838-68628334	RAP1B	0.0177345	0.0161711
chr12:68630023-68631197	RAP1B	0.0145399	0.041688
chr12:68635419-68636871	RAP1B	0.0131017	0.0423482
chr12:68639442-68640289	RAP1B	0.0168825	0.0267004
chr12:68645258-68645921	RAP1B	0.0154572	0.0173225
chr12:68646266-68647831	RAP1B	0.016213	0.0179248
chr12:68654558-68655827	RAP1B	0.0239403	0.00616693
chr12:8512834-8513924	CLEC4E	0.0282606	0.0240761
chr12:8518064-8519762	CLEC4E	0.0290513	0.0299924
chr12:8530983-8531242	CLEC4E	0.0278224	0.00121779
chr12:8531953-8532350	CLEC4E	0.0207222	0.0278257
chr12:8533931-8534204	CLEC4E	0.0260153	0.00651489
chr12:8540202-8541679	CLEC4E	0.067376	4.22e-05
chr12:8542215-8542536	CLEC4E	0.0479139	3.74e-05
chr12:8565859-8566936	CLEC4E	0.0315013	0.028596
chr12:8583709-8584378	CLEC4E	0.0267699	0.0151042
chr12:10131037-10131519	OLR1	0.0482428	0.00839549
chr12:10147592-10148553	OLR1	0.050674	0.00098892
chr12:10167267-10168163	OLR1	0.057303	0.0334562
chr12:10172027-10172391	OLR1	0.0536815	0.00141879
chr12:10184299-10185003	OLR1	0.0693326	0.00100918
chr12:10186381-10186782	OLR1	0.0684546	0.0380551
chr12:10196076-10196736	OLR1	0.0514865	0.00025935
chr12:10200408-10201382	OLR1	0.04584	0.0218101
chr12:10212131-10213857	OLR1	0.0457186	0.0104972
chr12:10219564-10220878	OLR1	0.0664008	0.00051329
chr12:89604899-89607384	ATP2B1	0.0506583	0.00017188
chr12:89608862-89609073	ATP2B1	0.0319804	0.010634
chr12:89610465-89611053	ATP2B1	0.0412633	0.00055151
chr12:89611603-89613222	ATP2B1	0.0348876	0.0434476
chr12:89613986-89615649	ATP2B1	0.0635306	1.39e-05
chr12:89617963-89618753	ATP2B1	0.0319192	0.034333
chr12:89625010-89626017	ATP2B1	0.0322109	0.0379768
chr12:89628148-89629518	ATP2B1	0.0502551	0.00059038
chr12:89630899-89632157	ATP2B1	0.0341904	0.00735431
chr12:89632678-89633067	ATP2B1	0.0250726	0.0485733
chr12:89642544-89642975	ATP2B1	0.0246542	0.0305667
chr12:89644726-89645111	ATP2B1	0.0393336	0.00194575
chr12:89674452-89674807	ATP2B1	0.0210062	0.0415084
chr12:89678026-89678968	ATP2B1	0.0263688	0.0335794
chr12:89691053-89691382	ATP2B1	0.0217312	0.0230756
chr12:89693129-89693363	ATP2B1	0.0358065	0.00492246
chr12:89697166-89699089	ATP2B1	0.0596701	0.00599425
chr12:89699676-89700666	ATP2B1	0.0313195	0.0454357
chr12:123389539-123390273	RILPL2	0.0433401	0.0260912
chr12:123390827-123391393	RILPL2	0.0369611	0.0496802
chr12:123398600-123399978	RILPL2	0.0364847	0.00823384
chr12:123404872-123406158	RILPL2	0.042564	0.00839233
chr12:123410273-123410541	RILPL2	0.049792	3.48e-05
chr12:123411763-123413241	RILPL2	0.0649743	4.3e-05
chr12:123413514-123414975	RILPL2	0.0524532	0.00172796
chr12:123416415-123418185	RILPL2	0.0466928	0.0117192
chr12:123418803-123419645	RILPL2	0.0440441	0.00112854
chr12:123420099-123420650	RILPL2	0.0413155	0.00537966
chr12:123423697-123423902	RILPL2	0.033619	0.0153836
chr12:123426736-123427680	RILPL2	0.0531918	0.00062656
chr12:123444154-123444944	RILPL2	0.0600123	0.0018661
chr12:123449250-123449546	RILPL2	0.0599915	0.00636017
chr14:54834603-54835019	GCH1	0.0320894	0.00155648
chr14:54836480-54836897	GCH1	0.0410771	2.85e-05
chr14:54837784-54838128	GCH1	0.0215658	0.0295258
chr14:54838786-54840656	GCH1	0.0274466	0.00911259
chr14:54840927-54841830	GCH1	0.0173653	0.0489678
chr14:54852388-54852855	GCH1	0.0194788	0.017448
chr14:54866423-54867576	GCH1	0.0191367	0.0411106
chr14:54867829-54868354	GCH1	0.0190546	0.0204938
chr14:54888318-54888553	GCH1	0.021399	0.031587
chr14:54890720-54891945	GCH1	0.0236523	0.0284948
chr14:54892983-54893476	GCH1	0.0204474	0.0352861
chr14:54900742-54903346	GCH1	0.0363628	0.005829
chr14:54908156-54909266	GCH1	0.0269527	0.0192213
chr15:39558525-39558720	THBS1	0.0159016	0.0492401
chr15:39580026-39581895	THBS1	0.0725782	2e-12
chr15:39586478-39586986	THBS1	0.0530809	2.89e-08
chr15:39587375-39589137	THBS1	0.0788373	1.89e-14
chr15:39589651-39590041	THBS1	0.0469212	5.79e-07
chr15:39591226-39591794	THBS1	0.0445427	1.28e-05
chr15:39592586-39593007	THBS1	0.0580444	8.76e-09
chr15:39593223-39594515	THBS1	0.0595664	5.95e-08
chr15:39595658-39596172	THBS1	0.0482567	1.78e-05
chr15:39597764-39600071	THBS1	0.0730898	5.23e-13
chr15:45384842-45385154	C15orf48	0.0253472	0.0270413
chr15:45430059-45430820	C15orf48	0.0380966	0.0382854
chr15:45433845-45434516	C15orf48	0.0752447	6.54e-12
chr15:45445224-45445885	C15orf48	0.079412	1.81e-05
chr15:45448026-45448746	C15orf48	0.0673435	3.7e-05
chr15:45464290-45465039	C15orf48	0.0278284	0.0112746
chr15:45465864-45466522	C15orf48	0.0402336	4.15e-05
chr15:45466718-45467083	C15orf48	0.0278826	0.00705191
chr15:45468193-45469812	C15orf48	0.0258051	0.022682
chr15:58137907-58138662	AQP9	0.0216271	0.00204206
chr15:58139679-58140371	AQP9	0.0310709	0.00033315
chr15:58146600-58147642	AQP9	0.0143382	0.0330796
chr15:58156586-58156848	AQP9	0.0271606	0.0004018
chr15:58158105-58158335	AQP9	0.0269802	8.44e-05
chr15:58162263-58163380	AQP9	0.00705257	0.0449423
chr15:58163862-58164272	AQP9	0.018336	0.00557706
chr15:58169104-58169490	AQP9	0.0264797	0.00115638
chr15:58169979-58170597	AQP9	0.029983	0.00085006
chr15:58171383-58171638	AQP9	0.0187811	0.00540315
chr15:58173923-58174925	AQP9	0.0152647	0.0144175
chr15:58179921-58180483	AQP9	0.0171151	0.0132637
chr15:58187683-58188654	AQP9	0.0136143	0.027701
chr16:31877352-31877853	ZNF267	0.0342246	0.0143518
chr16:31880255-31880901	ZNF267	0.0207545	0.0268468
chr16:31915818-31916819	ZNF267	0.0215235	0.0150689
chr16:31918625-31919070	ZNF267	0.0257641	0.00415554
chr16:31919466-31920804	ZNF267	0.0476117	1.74e-05
chr16:31921120-31921571	ZNF267	0.0381968	0.00024104
chr16:31921792-31922375	ZNF267	0.0273279	0.00141093
chr16:31922946-31923155	ZNF267	0.0299821	0.00521283
chr16:11539546-11540078	LITAF	0.0183056	0.0312242
chr16:11541713-11542166	LITAF	0.0185756	0.0402386
chr16:11543754-11544308	LITAF	0.0253673	0.00843438
chr16:11544806-11545892	LITAF	0.0484636	5.51e-07
chr16:11550526-11551615	LITAF	0.020471	0.037525
chr16:11553373-11553773	LITAF	0.0284834	0.00510631
chr16:11555083-11555445	LITAF	0.0187453	0.0323107
chr16:11558627-11558866	LITAF	0.0192069	0.0235523
chr16:11560373-11561527	LITAF	0.0258598	0.0102242
chr16:11561872-11562287	LITAF	0.0185974	0.0350474
chr16:11563349-11565135	LITAF	0.0253083	0.00679057
chr16:11570306-11571739	LITAF	0.0177957	0.0249023
chr16:11585387-11586267	LITAF	0.0517631	2.77e-06
chr16:11586494-11587473	LITAF	0.0467114	0.00225674
chr16:11596958-11598946	LITAF	0.034065	0.0195121
chr16:11603851-11604204	LITAF	0.0177728	0.0491873
chr16:87821585-87822086	SLC7A5	0.0299366	0.00880898
chr16:87826372-87828529	SLC7A5	0.064417	0.00077644
chr16:87835073-87835366	SLC7A5	0.0287865	0.017479
chr16:87837061-87838227	SLC7A5	0.0595301	9.81e-05
chr16:87839549-87840037	SLC7A5	0.0341811	0.00168245
chr16:87841488-87842542	SLC7A5	0.0340304	0.0400409
chr16:87843477-87844064	SLC7A5	0.0359839	0.0138676
chr16:87844496-87845303	SLC7A5	0.033448	0.0293932
chr16:87846197-87846394	SLC7A5	0.034747	0.00702939
chr16:87853516-87854065	SLC7A5	0.0553164	0.0313699
chr16:87856000-87856805	SLC7A5	0.0527846	0.0310106
chr16:87860501-87861234	SLC7A5	0.0580833	0.00035775
chr16:87862090-87863348	SLC7A5	0.0386693	0.00937569
chr16:87868270-87869844	SLC7A5	0.0509067	0.027104
chr17:34207615-34207875	CCL2	0.0200957	0.00653716
chr17:34208233-34208808	CCL2	0.0231826	0.0183156
chr17:34218297-34219126	CCL2	0.0285149	0.00510709
chr17:34220636-34221831	CCL2	0.0231578	0.0230765
chr17:34249578-34249818	CCL2	0.0288401	0.00741658
chr17:34254774-34255685	CCL2	0.059466	4.06e-07
chr17:34261630-34262341	CCL2	0.0354967	0.00052392
chr17:34272875-34273481	CCL2	0.0278306	0.00568993
chr17:34300583-34301017	CCL2	0.0185841	0.0229425
chr17:36178112-36178551	CCL4L2	0.0244911	0.0046052
chr17:36188061-36189468	CCL4L2	0.0521016	0.00935194
chr17:36189998-36190274	CCL4L2	0.0267597	0.0277478
chr17:36192277-36192824	CCL4L2	0.0502911	0.00165181
chr17:36196367-36197497	CCL4L2	0.109816	2.23e-09
chr17:36198981-36199436	CCL4L2	0.0929356	3.57e-06
chr17:36210558-36211413	CCL4L2	0.06996	0.00019238
chr17:36211806-36212426	CCL4L2	0.0798299	2.13e-06
chr17:36213111-36213340	CCL4L2	0.0366612	0.00983768
chr17:36215564-36215919	CCL4L2	0.0335636	0.0132298
chr17:36220850-36221770	CCL4L2	0.0410428	0.0001052
chr17:36229719-36230002	CCL4L2	0.0273186	0.00144662
chr17:51005752-51005977	SPAG9	0.0177723	0.0358042
chr17:51024524-51025261	SPAG9	0.0182656	0.0242892
chr17:51028373-51031233	SPAG9	0.0277328	0.0200821
chr17:51037820-51038400	SPAG9	0.0222072	0.0221079
chr17:51051135-51051851	SPAG9	0.0321679	0.00034713
chr17:51062323-51062828	SPAG9	0.0258227	0.003572
chr17:51075793-51076157	SPAG9	0.0202367	0.0153098
chr17:51076552-51077267	SPAG9	0.0176214	0.0425794
chr17:68511622-68513481	FAM20A	0.0140086	0.00888718
chr17:68533866-68534534	FAM20A	0.0330352	0.00016453
chr17:68539415-68540581	FAM20A	0.0222858	0.020508
chr17:68563321-68563683	FAM20A	0.0537141	8.44e-07
chr17:68566081-68567131	FAM20A	0.0154971	0.0360837
chr17:68572099-68573204	FAM20A	0.0236018	0.0189794
chr17:68579967-68581169	FAM20A	0.0357189	0.00224636
chr17:68595194-68595800	FAM20A	0.0235719	0.00904157
chr17:68600219-68601411	FAM20A	0.0195646	0.0316798
chr17:68601660-68602576	FAM20A	0.0431541	0.0012071
chr17:68602805-68603575	FAM20A	0.0243569	0.00481835
chr18:63859612-63861016	SERPINB2	0.0293887	0.0018435
chr18:63869201-63870357	SERPINB2	0.0187834	0.015149
chr18:63878411-63879328	SERPINB2	0.0174181	0.0212225
chr18:63879773-63880238	SERPINB2	0.0141836	0.0297119
chr18:63887281-63887803	SERPINB2	0.0296423	0.00184922
chr18:63892311-63893114	SERPINB2	0.0318881	0.00121214
chr18:63894039-63894770	SERPINB2	0.0252302	0.00193408
chr18:63895288-63895649	SERPINB2	0.020907	0.00806614
chr18:63900507-63900872	SERPINB2	0.0152633	0.0489337
chr18:63904045-63904534	SERPINB2	0.0158734	0.0282527
chr18:63921429-63922684	SERPINB2	0.0224072	0.0091233
chr18:48901960-48903511	SMAD7	0.0612025	0.0022038
chr18:48913847-48914128	SMAD7	0.0236036	0.0214247
chr18:48916048-48916587	SMAD7	0.0210807	0.0441888
chr18:48917259-48918097	SMAD7	0.0580069	7.68e-05
chr18:48922586-48924011	SMAD7	0.0581716	0.00422319
chr18:48928675-48929467	SMAD7	0.0984644	6.39e-08
chr18:48932715-48935769	SMAD7	0.0615867	0.00193746
chr18:48940512-48941480	SMAD7	0.0363891	0.016354
chr18:48951435-48953053	SMAD7	0.040419	0.0328295
chr18:48975546-48976554	SMAD7	0.0493108	0.0195735
chr19:10230310-10231616	ICAM1	0.0504679	0.0151872
chr19:10236031-10236867	ICAM1	0.0400625	0.0263694
chr19:10269510-10271909	ICAM1	0.0576491	0.00088773
chr19:10276693-10277246	ICAM1	0.0310297	0.00503928
chr19:10278890-10279260	ICAM1	0.0268957	0.0183242
chr19:10279810-10280236	ICAM1	0.0369927	0.00390694
chr19:10286173-10288122	ICAM1	0.0604769	0.0305254
chr19:10289261-10289607	ICAM1	0.0725178	3.16e-05
chr19:11089292-11090881	LDLR	0.0512873	0.0170933
chr19:11092332-11093587	LDLR	0.0612477	0.0258212
chr19:11102649-11103253	LDLR	0.031911	0.0335997
chr19:11103472-11106956	LDLR	0.0633555	0.00420068
chr19:11108028-11108794	LDLR	0.0405925	0.0161149
chr19:11111179-11112794	LDLR	0.0523127	0.00672946
chr19:11113754-11114327	LDLR	0.0351034	0.0179353
chr19:11115219-11116812	LDLR	0.0503361	0.0348764
chr19:11118135-11118764	LDLR	0.0705257	8.08e-06
chr19:11119096-11121249	LDLR	0.083384	0.00022849
chr19:11124064-11124280	LDLR	0.0305082	0.011187
chr19:11138633-11139115	LDLR	0.0433388	0.005157
chr19:13753538-13753954	ZSWIM4	0.0234414	0.029434
chr19:13796806-13797182	ZSWIM4	0.0270764	0.0415095
chr19:13803020-13803435	ZSWIM4	0.0319066	0.00371049
chr19:13814027-13814565	ZSWIM4	0.026024	0.0106857
chr19:13823192-13823633	ZSWIM4	0.0485255	3.11e-05
chr19:13825384-13826271	ZSWIM4	0.0307389	0.0494611
chr19:13830036-13831761	ZSWIM4	0.0313138	0.0463496
chr19:13833105-13834250	ZSWIM4	0.037184	0.018209
chr19:13835834-13837288	ZSWIM4	0.0317267	0.049328
chr19:13838955-13840763	ZSWIM4	0.0276398	0.0106513
chr19:13841224-13841772	ZSWIM4	0.0412544	0.0213695
chr19:45418878-45419910	FOSB	0.0333239	0.0306562
chr19:45428573-45429181	FOSB	0.029012	0.00616679
chr19:45450136-45451473	FOSB	0.0514766	0.00860305
chr19:45455672-45456636	FOSB	0.0620098	0.0116847
chr19:45467270-45468488	FOSB	0.0418933	0.0423236
chr19:45493487-45493796	FOSB	0.0191602	0.015408
chr19:45509030-45509514	FOSB	0.0367619	0.00545932
chr19:45514668-45516468	FOSB	0.0654653	0.00023225
chr19:54837101-54838054	FCAR	0.038911	0.0103242
chr19:54855365-54855692	FCAR	0.0335574	0.0342389
chr19:54859118-54859992	FCAR	0.0423676	0.0135271
chr19:54871584-54872190	FCAR	0.0391417	0.031145
chr19:54881011-54881759	FCAR	0.0317925	0.0259928
chr19:54882500-54883144	FCAR	0.0456694	0.00184809
chr19:54883434-54884386	FCAR	0.0467425	0.00309269
chr19:54888084-54888759	FCAR	0.0412818	0.00899574
chr19:54888989-54890225	FCAR	0.0573757	0.00307125
chr19:54891856-54894218	FCAR	0.0872305	1.09e-08
chr19:54905804-54906313	FCAR	0.0281207	0.0324871
chr19:4531558-4532089	SEMA6B	0.039979	0.00662988
chr19:4539721-4540598	SEMA6B	0.038266	0.0459191
chr19:4541299-4542044	SEMA6B	0.0338444	0.0446767
chr19:4542657-4543786	SEMA6B	0.0559449	0.00313279
chr19:4548334-4549141	SEMA6B	0.0425503	0.00077568
chr19:4559523-4560021	SEMA6B	0.0614296	0.00420891
chr19:4567645-4568271	SEMA6B	0.0612772	0.00056924
chr19:4575084-4576467	SEMA6B	0.0652636	2.55e-05
chr19:4589705-4589991	SEMA6B	0.0293229	0.0294109
chr19:43638457-43639076	PLAUR	0.0253393	0.0320422
chr19:43644051-43644584	PLAUR	0.0250711	0.044672
chr19:43644835-43645561	PLAUR	0.0491466	0.00019494
chr19:43646060-43648415	PLAUR	0.0684932	1.38e-05
chr19:43648866-43649122	PLAUR	0.0437086	0.00180724
chr19:43650035-43650454	PLAUR	0.0406112	0.00751548
chr19:43654661-43654863	PLAUR	0.0291669	0.0327178
chr19:43655259-43655645	PLAUR	0.0424193	0.00629733
chr19:43656425-43658935	PLAUR	0.0728334	0.0007777
chr19:43659246-43659625	PLAUR	0.0476852	0.00125934
chr19:43662633-43662912	PLAUR	0.0665525	2.38e-06
chr19:43683041-43683677	PLAUR	0.0507414	0.00118293
chr19:43688306-43688712	PLAUR	0.0443383	0.0258725
chr19:43699488-43699887	PLAUR	0.0336408	0.0222953
chr19:43707284-43707655	PLAUR	0.0266729	0.0148278
chr20:37315710-37317001	SRC	0.0534186	0.00188686
chr20:37318015-37318665	SRC	0.0295019	0.0199036
chr20:37333526-37334219	SRC	0.0645696	3.52e-07
chr20:37335807-37337167	SRC	0.0667905	2.1e-06
chr20:37378123-37378408	SRC	0.0224403	0.0265945
chr20:37382076-37382512	SRC	0.0321337	0.00498799
chr20:37390976-37391328	SRC	0.0258736	0.00451009
chr20:37392189-37392876	SRC	0.0296255	0.00362417
chr20:37393926-37394200	SRC	0.0255485	0.00632761
chr20:49982126-49983420	SNAI1	0.0844553	0.00085473
chr20:49989209-49990182	SNAI1	0.102304	3.46e-06
chr20:49993198-49994044	SNAI1	0.0591115	0.00333994
chr20:49999258-49999683	SNAI1	0.0877592	4.97e-05
chr20:50003086-50003713	SNAI1	0.0635725	0.0145615
chr20:50004183-50004850	SNAI1	0.0708034	0.00278107
chr20:50005547-50006559	SNAI1	0.0809793	0.00675666
chr20:50013862-50015184	SNAI1	0.0588173	0.00332117
chr20:50019640-50020936	SNAI1	0.060129	0.0217772
chr20:50029649-50030448	SNAI1	0.0978602	0.00025055
chr20:3658623-3659624	SIGLEC1	0.0390059	0.0486226
chr20:3681794-3682721	SIGLEC1	0.0346677	0.0408648
chr20:3685155-3685676	SIGLEC1	0.0348963	0.00966945
chr20:3686439-3688661	SIGLEC1	0.0378215	0.0156625
chr20:3693221-3693808	SIGLEC1	0.0312458	0.0248456
chr20:3710872-3711796	SIGLEC1	0.0665004	0.00278328
chr20:3728956-3729491	SIGLEC1	0.0226335	0.0476696
chr20:3734015-3734652	SIGLEC1	0.024649	0.037721
chr20:3744831-3745519	SIGLEC1	0.0669837	0.00200578
chr21:41390137-41391076	MX1	0.0308736	0.0178087
chr21:41419933-41421158	MX1	0.10342	2.43e-07
chr21:41423369-41424108	MX1	0.0773677	7.4e-05
chr21:41425758-41427175	MX1	0.0931521	1.03e-06
chr21:41433124-41433379	MX1	0.0258615	0.0205642
chr21:41447239-41447475	MX1	0.0253106	0.040474
chr21:41451779-41452431	MX1	0.048757	0.00011591
chr21:41458961-41461190	MX1	0.0623871	0.0009115
chr22:38172800-38173143	MAFF	0.0784653	6.01e-05
chr22:38176122-38176742	MAFF	0.0907658	0.00022164
chr22:38179976-38180568	MAFF	0.0574606	0.0107953
chr22:38208555-38209098	MAFF	0.0386126	0.0303323
chr22:38213294-38214954	MAFF	0.0677998	0.00564268
chr22:38216626-38216814	MAFF	0.0418808	0.00281202
chr22:38218553-38219218	MAFF	0.0879658	3.68e-07
chr22:38223110-38223663	MAFF	0.0349408	0.0251896
chr22:49930799-49931403	PIM3	0.0558655	0.0362359
chr22:49934215-49935480	PIM3	0.0945849	2.05e-05
chr22:49935960-49936593	PIM3	0.0398202	0.0421837
chr22:49950701-49951315	PIM3	0.0486704	0.0076261
chr22:49962002-49962797	PIM3	0.0833672	0.00014371
chr22:49966368-49967929	PIM3	0.0728596	0.00360254
chr22:49970436-49971880	PIM3	0.0762454	0.00179062
chr22:49975895-49977039	PIM3	0.0609958	0.00356814
chr22:49979477-49980017	PIM3	0.0471759	0.00209662
chr22:49982757-49984276	PIM3	0.0713312	2.46e-05
chr22:49994255-49994474	PIM3	0.0258558	0.0354353
chr22:30246032-30248395	OSM	0.0559158	0.0312215
chr22:30252720-30253585	OSM	0.0812098	0.00012354
chr22:30258111-30258319	OSM	0.0468429	0.00623961
chr22:30261198-30261584	OSM	0.0724784	0.0290638
chr22:30263029-30263818	OSM	0.0932847	0.00099436
chr22:30265788-30267887	OSM	0.105368	6.92e-05
chr22:30273072-30274025	OSM	0.124887	1.94e-06
chr22:30276152-30276344	OSM	0.0781441	0.00045262
chr22:30277651-30277978	OSM	0.086433	7.92e-06
chr22:30279089-30280014	OSM	0.10561	0.00056382
chr22:30282410-30282975	OSM	0.0698909	0.0129898
chr22:30286883-30287235	OSM	0.0626664	0.0186334
chr22:37541868-37542401	LGALS2	0.0640035	0.00820493
chr22:37556744-37556959	LGALS2	0.0238107	0.0384784
chr22:37559985-37562190	LGALS2	0.0766055	0.00024762
chr22:37566254-37567777	LGALS2	0.0662038	0.0366384
chr22:37574269-37575181	LGALS2	0.10467	0.00010387
chr22:37579883-37580626	LGALS2	0.102535	1.81e-05
chr22:37581328-37581852	LGALS2	0.0444435	0.0144039
chr22:37610678-37611413	LGALS2	0.0671887	0.0248488
chrX:2643397-2645032	CD99	0.0414838	0.0367217
chrX:2690748-2692020	CD99	0.0969081	1.72e-05
chrX:2696535-2697350	CD99	0.083448	0.00025073
chrX:2701503-2702134	CD99	0.0598959	0.00078517
chrX:2707190-2707987	CD99	0.0755217	0.00241214
chrX:2708235-2709177	CD99	0.0801777	0.00019263
chrX:2709884-2710856	CD99	0.0776226	0.00040772
chrX:2718067-2719247	CD99	0.0441013	0.00011861
chrX:2731307-2731668	CD99	0.0309411	0.0042276

## Sheet: CD16+ Monocyte
PeakRanges	Gene	rObs	pvalZ
chr1:156096354-156097752	LMNA	0.10728	5.21134e-05
chr1:156104025-156104573	LMNA	0.0782199	0.00532729
chr1:156106024-156106882	LMNA	0.102142	1.40407e-06
chr1:156114139-156115261	LMNA	0.15735	5.25009e-09
chr1:156119689-156120378	LMNA	0.0984091	6.28498e-05
chr1:156123488-156124110	LMNA	0.0858388	0.00100121
chr1:156125200-156125463	LMNA	0.063665	0.00816937
chr1:156126164-156127573	LMNA	0.0885877	3.40178e-05
chr1:156128692-156128963	LMNA	0.0772941	0.000242388
chr2:9483621-9484554	ADAM17	0.0441159	0.00453867
chr2:9485044-9485771	ADAM17	0.0380604	0.0310107
chr2:9487589-9487931	ADAM17	0.0483065	0.00221299
chr2:9490103-9490415	ADAM17	0.0244273	0.0486855
chr2:9491624-9491876	ADAM17	0.0401811	0.00239536
chr2:9496422-9497499	ADAM17	0.0488098	0.00534591
chr2:9502398-9502597	ADAM17	0.0383506	0.00640538
chr2:9502942-9503310	ADAM17	0.0582583	0.00152213
chr2:9508836-9509375	ADAM17	0.0477239	0.000331068
chr2:9544649-9545034	ADAM17	0.0468131	0.000550215
chr2:96123012-96123421	DUSP2	0.0776242	0.000617223
chr2:96123806-96124498	DUSP2	0.0624908	0.00356648
chr2:96129907-96130459	DUSP2	0.0651428	0.00261965
chr2:96132568-96132853	DUSP2	0.0405727	0.0338971
chr2:96133749-96134143	DUSP2	0.0536479	0.0079476
chr2:96134398-96135072	DUSP2	0.0737096	0.000663556
chr2:96137777-96138125	DUSP2	0.0477164	0.0301934
chr2:96144978-96146782	DUSP2	0.104061	0.000422271
chr2:96148455-96148984	DUSP2	0.0812125	0.0169274
chr2:96157437-96158512	DUSP2	0.083753	0.00585563
chr3:4977083-4979727	BHLHE40	0.149739	4.30322e-05
chr3:4980199-4980555	BHLHE40	0.0809533	0.00398937
chr3:4983919-4984587	BHLHE40	0.139607	1.27184e-05
chr3:4986484-4987313	BHLHE40	0.071968	0.00505127
chr3:4990126-4990596	BHLHE40	0.0343601	0.0478916
chr3:4994376-4994653	BHLHE40	0.0700823	0.000226174
chr3:5001246-5001456	BHLHE40	0.028953	0.030207
chr3:5006564-5007274	BHLHE40	0.109767	3.34037e-05
chr3:5011444-5013778	BHLHE40	0.110056	0.000442206
chr3:5017855-5018289	BHLHE40	0.0870115	0.000515464
chr3:5019568-5020605	BHLHE40	0.0609275	0.0499186
chr3:5026242-5027300	BHLHE40	0.0790721	0.00232113
chr4:81413110-81413622	RASGEF1B	0.0559584	0.0101675
chr4:81428982-81430661	RASGEF1B	0.0935325	0.000114243
chr4:81438287-81439750	RASGEF1B	0.0888408	6.68394e-05
chr4:81440131-81440548	RASGEF1B	0.0602992	0.000954708
chr4:81447811-81449459	RASGEF1B	0.0729358	0.00097363
chr4:81449969-81451060	RASGEF1B	0.053352	0.00374471
chr4:81454533-81455383	RASGEF1B	0.0732348	0.000346347
chr4:81459856-81461062	RASGEF1B	0.0758661	0.000348693
chr4:81461280-81461503	RASGEF1B	0.0523524	0.00733873
chr4:81462480-81462779	RASGEF1B	0.0483995	0.01341
chr4:81465391-81465746	RASGEF1B	0.0415166	0.0455431
chr4:81470387-81472643	RASGEF1B	0.0304552	0.0398332
chr5:1457228-1458007	LPCAT1	0.0255283	0.0389223
chr5:1459056-1460835	LPCAT1	0.0299497	0.0191534
chr5:1469812-1470338	LPCAT1	0.0624452	2.20805e-05
chr5:1477170-1477962	LPCAT1	0.0289486	0.0265014
chr5:1478302-1478522	LPCAT1	0.0351154	0.0147617
chr5:1479550-1480800	LPCAT1	0.0387533	0.0160404
chr5:1490465-1490861	LPCAT1	0.0287648	0.0333515
chr5:1504858-1505291	LPCAT1	0.024248	0.0409384
chr5:150383490-150384504	CD74	0.0773599	0.00354112
chr5:150386460-150387390	CD74	0.0612947	0.0165324
chr5:150391034-150391794	CD74	0.0639701	0.0147058
chr5:150393990-150394548	CD74	0.0577883	0.0333106
chr5:150397867-150398172	CD74	0.0541532	0.0445733
chr5:150398545-150400169	CD74	0.0856496	0.00196589
chr5:150400397-150401444	CD74	0.0947319	0.00133293
chr5:150406997-150407731	CD74	0.074742	0.00734488
chr5:150412279-150413382	CD74	0.091035	0.000679308
chr5:150429358-150430070	CD74	0.0706837	0.0177197
chr6:137823834-137824755	TNFAIP3	0.086754	0.000414994
chr6:137833685-137834257	TNFAIP3	0.0760858	0.000178748
chr6:137861540-137862046	TNFAIP3	0.0380938	0.0232382
chr6:137866477-137868162	TNFAIP3	0.0556777	0.010085
chr6:137873150-137873740	TNFAIP3	0.0593704	0.00451863
chr6:137877889-137878640	TNFAIP3	0.0617801	0.00311644
chr6:137880821-137881935	TNFAIP3	0.0652864	0.00465692
chr6:137882426-137882938	TNFAIP3	0.0822189	5.95361e-05
chr6:137883408-137883835	TNFAIP3	0.06285	0.00348518
chr9:99820895-99822245	NR4A3	0.0500821	0.0269463
chr9:99827822-99829105	NR4A3	0.0648098	0.0257798
chr9:99833686-99834094	NR4A3	0.0676641	0.00185049
chr9:99836264-99836814	NR4A3	0.0865147	0.000196598
chr9:99840079-99840689	NR4A3	0.0651442	0.000524405
chr9:99841122-99841879	NR4A3	0.116457	2.78905e-08
chr9:99843187-99843435	NR4A3	0.0740929	5.00553e-07
chr9:99843735-99844009	NR4A3	0.0494309	0.0302502
chr9:99847879-99848092	NR4A3	0.043764	0.00943462
chr9:99849703-99851205	NR4A3	0.0880071	0.000241169
chr9:99851405-99851924	NR4A3	0.0532335	0.00908524
chr9:99861389-99861755	NR4A3	0.0704048	0.000910739
chr11:1732454-1732735	CTSD	0.0441908	0.00143252
chr11:1733694-1735095	CTSD	0.046886	0.00573161
chr11:1736517-1736720	CTSD	0.0451551	0.00361249
chr11:1741432-1741661	CTSD	0.0319909	0.0274936
chr11:1744311-1745277	CTSD	0.0486745	0.0107502
chr11:1746456-1747127	CTSD	0.0423294	0.0321244
chr11:1748124-1749234	CTSD	0.0647933	0.0003407
chr11:1750367-1751885	CTSD	0.0451731	0.0172174
chr11:1763599-1764306	CTSD	0.0549278	0.0222999
chr11:1770359-1770906	CTSD	0.0564476	0.00290993
chr11:1780948-1782542	CTSD	0.0582162	0.00825386
chr11:1792383-1792998	CTSD	0.0595303	0.00113051
chr11:88302379-88302710	CTSC	0.0285945	0.0245214
chr11:88328612-88330127	CTSC	0.0628621	0.000118521
chr11:88331080-88331889	CTSC	0.0274474	0.0479224
chr11:88335202-88335456	CTSC	0.0382756	0.00731255
chr11:88353831-88354475	CTSC	0.0308086	0.0212342
chr11:88354789-88355270	CTSC	0.0519479	0.00330243
chr11:88355990-88356179	CTSC	0.0340074	0.011786
chr11:88357322-88357690	CTSC	0.0361068	0.0427576
chr13:42882922-42884344	EPSTI1	0.0404665	0.0340697
chr13:42885088-42886104	EPSTI1	0.0689049	0.000386394
chr13:42896518-42896938	EPSTI1	0.0453355	0.0131785
chr13:42913690-42914001	EPSTI1	0.0632231	0.000765728
chr13:42922976-42923242	EPSTI1	0.0516783	0.00888725
chr13:42933549-42933752	EPSTI1	0.0537307	0.00306789
chr13:42933955-42934153	EPSTI1	0.03395	0.0446422
chr13:42935965-42936335	EPSTI1	0.0298649	0.0383012
chr13:42946823-42947346	EPSTI1	0.0367283	0.035512
chr16:11526821-11527308	LITAF	0.0462265	0.00941328
chr16:11541397-11542130	LITAF	0.0485483	0.0160149
chr16:11560477-11561148	LITAF	0.0633204	0.00727507
chr16:11567776-11568003	LITAF	0.0351381	0.0428095
chr16:11568207-11568443	LITAF	0.0480898	0.00867719
chr16:11570134-11570437	LITAF	0.0604491	0.000396615
chr16:11583954-11586231	LITAF	0.0550141	0.0410421
chr16:11586549-11587464	LITAF	0.0733159	0.0185538
chr16:11597091-11598948	LITAF	0.0855222	0.00119366
chr17:1576713-1578081	SLC43A2	0.0550559	0.00372762
chr17:1583633-1583853	SLC43A2	0.0529094	0.00596106
chr17:1588882-1589380	SLC43A2	0.0667106	0.00140594
chr17:1589887-1590877	SLC43A2	0.0828042	0.000264429
chr17:1614020-1614739	SLC43A2	0.0439397	0.027118
chr17:1620553-1620948	SLC43A2	0.0355707	0.0309216
chr17:1623197-1623516	SLC43A2	0.0463042	0.00895122
chr17:1631471-1631825	SLC43A2	0.0565575	0.0126999
chr18:48901997-48903416	SMAD7	0.0902788	0.000473347
chr18:48913865-48914059	SMAD7	0.0560454	0.00249261
chr18:48915929-48916602	SMAD7	0.0757313	0.000740624
chr18:48917308-48918099	SMAD7	0.0759396	0.000181845
chr18:48922609-48923944	SMAD7	0.0907325	9.40651e-05
chr18:48928659-48929456	SMAD7	0.0653434	0.00315522
chr18:48932890-48933378	SMAD7	0.0688324	0.00357565
chr18:48934019-48935770	SMAD7	0.0839767	0.000812389
chr18:48939706-48940270	SMAD7	0.0940772	4.69915e-06
chr18:48940536-48941372	SMAD7	0.0570008	0.000639791
chr18:48948700-48949372	SMAD7	0.0575691	0.0189126
chr18:48951411-48953043	SMAD7	0.0603065	0.00212597
chr18:48979835-48980616	SMAD7	0.0573064	0.00626583
chr19:2221426-2222146	OAZ1	0.0362309	0.0208575
chr19:2250978-2254209	OAZ1	0.0464664	0.0340639
chr19:2266495-2266996	OAZ1	0.0671763	0.00168274
chr19:2269220-2269752	OAZ1	0.0532486	0.0177674
chr19:2270680-2271206	OAZ1	0.0534312	0.0465729
chr19:2273659-2273994	OAZ1	0.0377162	0.0438991
chr19:2298808-2299194	OAZ1	0.0674071	7.53138e-05
chr19:2306298-2306533	OAZ1	0.0315317	0.0261198
chr22:49930812-49931403	PIM3	0.0499	0.0301065
chr22:49934247-49934615	PIM3	0.0709225	0.000673701
chr22:49935024-49935480	PIM3	0.0571862	0.00757973
chr22:49935960-49936633	PIM3	0.0793202	0.000661164
chr22:49950689-49951447	PIM3	0.118942	2.14842e-06
chr22:49959956-49961021	PIM3	0.054772	0.0147812
chr22:49961995-49962782	PIM3	0.106463	3.4019e-05
chr22:49966543-49967913	PIM3	0.084862	0.001221
chr22:49970516-49971890	PIM3	0.11592	1.0715e-08
chr22:30224317-30225126	OSM	0.0436255	0.0326287
chr22:30252750-30253061	OSM	0.0851874	9.52244e-05
chr22:30263035-30263713	OSM	0.0918553	0.00723479
chr22:30265775-30267907	OSM	0.112902	1.11376e-05
chr22:30270703-30271381	OSM	0.0995915	0.00270524
chr22:30273165-30273973	OSM	0.135553	3.15927e-06
chr22:30276184-30276400	OSM	0.0421224	0.0233866
chr22:30277779-30277990	OSM	0.0842178	0.000552263
chr22:30279158-30279970	OSM	0.0919576	0.0020181
chr22:30302334-30303011	OSM	0.0593619	0.0462547
chrX:1308321-1308728	IL3RA	0.0284011	0.043202
chrX:1320140-1320707	IL3RA	0.0309441	0.0421007
chrX:1332856-1333401	IL3RA	0.141698	1.26006e-11
chrX:1333950-1334488	IL3RA	0.0834906	4.69744e-06
chrX:1336147-1337072	IL3RA	0.0470635	0.0142401
chrX:1341399-1342278	IL3RA	0.0438435	0.00349386
chrX:1347957-1348282	IL3RA	0.0369659	0.0075796
chrX:1350785-1351070	IL3RA	0.0407802	0.00565257
chrX:1355477-1356019	IL3RA	0.0633093	7.76594e-05
chrX:1359236-1359522	IL3RA	0.0422609	0.00370139
chrX:1360858-1361744	IL3RA	0.0414979	0.00345967

## Sheet: CD56dim NK
PeakRanges	Gene	rObs	pvalZ
chr2:30152701-30154442	YPEL5	0.0297662	0.0468032
chr2:30155880-30156361	YPEL5	0.0378157	0.00255937
chr2:30156892-30158170	YPEL5	0.0477723	0.00357876
chr2:30162048-30163608	YPEL5	0.084675	7.93815e-06
chr2:30171704-30173192	YPEL5	0.0441623	0.00346159
chr2:30176678-30177540	YPEL5	0.0226234	0.0145994
chr2:30177821-30178344	YPEL5	0.0354661	0.000141919
chr2:30179095-30179590	YPEL5	0.0354945	0.00069759
chr4:6134557-6135047	JAKMIP1	0.0418723	0.000113226
chr4:6169933-6171476	JAKMIP1	0.0867353	0
chr4:6177566-6178234	JAKMIP1	0.0593065	2.06131e-10
chr4:6180723-6181536	JAKMIP1	0.0550035	4.97484e-07
chr4:6183814-6184127	JAKMIP1	0.0317856	0.000603259
chr4:6198086-6199880	JAKMIP1	0.158519	0
chr4:6200178-6201213	JAKMIP1	0.0731562	3.36531e-10
chr4:6201684-6201887	JAKMIP1	0.0312032	0.000243179
chr5:134070860-134072179	TCF7	0.037771	0.00102742
chr5:134086855-134087649	TCF7	0.0245161	0.0173069
chr5:134090352-134091053	TCF7	0.0323106	0.00325875
chr5:134100142-134100949	TCF7	0.0516533	5.16105e-05
chr5:134104803-134105706	TCF7	0.0376594	0.00309545
chr5:134113969-134115925	TCF7	0.0337223	0.0013182
chr5:134122326-134123323	TCF7	0.0455479	0.000347342
chr5:134125434-134126339	TCF7	0.0316796	0.0207063
chr5:134131179-134131589	TCF7	0.0528726	0.000356678
chr5:134132126-134133127	TCF7	0.0669978	9.37466e-08
chr5:134137385-134137693	TCF7	0.0394112	0.00103799
chr5:134151633-134151914	TCF7	0.0290845	0.00682054
chr5:1089889-1090119	SLC12A7	0.0156136	0.044141
chr5:1094276-1094780	SLC12A7	0.0204783	0.0173986
chr5:1102294-1102804	SLC12A7	0.05185	1.92705e-05
chr5:1104412-1105159	SLC12A7	0.0522066	4.54722e-06
chr5:1105505-1106355	SLC12A7	0.0619641	5.25018e-10
chr5:1110358-1112290	SLC12A7	0.0268889	0.00696128
chr5:1134672-1134963	SLC12A7	0.0253653	0.00195612
chr5:1140080-1140871	SLC12A7	0.0278436	0.00640839
chr6:137819827-137820196	TNFAIP3	0.0709876	0.0011202
chr6:137822200-137822959	TNFAIP3	0.0424077	0.0457655
chr6:137828019-137828243	TNFAIP3	0.0417933	0.00636557
chr6:137830643-137830828	TNFAIP3	0.0272367	0.0116825
chr6:137866514-137868212	TNFAIP3	0.0398403	0.0359905
chr6:137873275-137873703	TNFAIP3	0.0477581	0.00120072
chr6:137874692-137875328	TNFAIP3	0.0405162	0.0102929
chr6:137878597-137879645	TNFAIP3	0.0505646	0.00418937
chr6:137880408-137881992	TNFAIP3	0.0868822	4.7685e-08
chr6:137882231-137883005	TNFAIP3	0.0882149	9.87456e-07
chr6:137883377-137883820	TNFAIP3	0.0714294	0.000110965
chr8:2000924-2002269	MYOM2	0.137096	3.62128e-08
chr8:2023283-2023511	MYOM2	0.0273889	0.00644768
chr8:2044177-2045656	MYOM2	0.0632032	6.31939e-10
chr8:2074889-2075662	MYOM2	0.0747622	6.74833e-09
chr8:2080790-2081743	MYOM2	0.0783884	4.19054e-12
chr8:2083725-2084364	MYOM2	0.15603	0
chr8:2086433-2087142	MYOM2	0.0813368	5.95102e-09
chr8:2089878-2090341	MYOM2	0.0634796	0.000120545
chr8:2091444-2091933	MYOM2	0.0623515	3.87167e-07
chr9:99811715-99811980	NR4A3	0.0290877	0.0097254
chr9:99821137-99822304	NR4A3	0.0253041	0.0318593
chr9:99837947-99838232	NR4A3	0.0292189	0.00141481
chr9:99844382-99844995	NR4A3	0.0240629	0.00765679
chr9:99850755-99852085	NR4A3	0.0333274	0.0268482
chr9:99855611-99855961	NR4A3	0.0577648	1.80911e-08
chr9:99867364-99868271	NR4A3	0.058068	1.26341e-06
chr9:99868973-99869185	NR4A3	0.0388069	0.000643233
chr12:52005575-52008023	NR4A1	0.0633894	8.31935e-06
chr12:52012878-52013129	NR4A1	0.0332499	0.00333265
chr12:52015375-52016065	NR4A1	0.0427974	0.0026398
chr12:52016722-52017392	NR4A1	0.0487611	0.000447722
chr12:52022996-52024222	NR4A1	0.0481941	0.000631062
chr12:52032620-52033487	NR4A1	0.0358466	0.025443
chr12:52036637-52037193	NR4A1	0.0417246	0.012021
chr12:52041815-52042488	NR4A1	0.0740439	4.23341e-07
chr12:52059753-52059965	NR4A1	0.065084	1.79649e-09
chr14:105473828-105474929	CRIP1	0.0459675	0.00539342
chr14:105480803-105482512	CRIP1	0.0389864	0.00257472
chr14:105487452-105488077	CRIP1	0.0331701	0.0487631
chr14:105489732-105490081	CRIP1	0.0350395	0.0143193
chr14:105496892-105497327	CRIP1	0.0292211	0.0209944
chr14:105498091-105498278	CRIP1	0.0242559	0.025921
chr14:105501400-105502156	CRIP1	0.0500837	4.74014e-05
chr14:105504332-105504794	CRIP1	0.0248698	0.0414384
chr17:36165839-36166423	CCL4L2	0.0337675	0.000505135
chr17:36182188-36184220	CCL4L2	0.0558812	3.08601e-06
chr17:36188673-36189511	CCL4L2	0.0809344	3.92984e-08
chr17:36192431-36192801	CCL4L2	0.0463579	4.10941e-05
chr17:36196201-36197423	CCL4L2	0.0690499	1.99872e-05
chr17:36202559-36202965	CCL4L2	0.0364754	0.00223739
chr17:36210478-36212158	CCL4L2	0.0847529	1.379e-06
chr17:36212984-36213304	CCL4L2	0.0595685	3.28508e-07
chr17:36214864-36215347	CCL4L2	0.0513736	1.18832e-06
chr17:83070316-83071019	METRNL	0.0198773	0.0411594
chr17:83089365-83091590	METRNL	0.0620744	0.00171564
chr17:83102744-83103885	METRNL	0.0329974	0.0262074
chr17:83109551-83110093	METRNL	0.0379291	0.00321237
chr17:83111699-83112248	METRNL	0.0289584	0.0224275
chr17:83112998-83114143	METRNL	0.0255148	0.0445536
chr17:83115547-83116092	METRNL	0.0311307	0.00600598
chr17:83116477-83116901	METRNL	0.0420804	0.000204702
chr17:83117871-83119361	METRNL	0.0284799	0.0214595
chr19:18261138-18263150	JUND	0.0413368	0.0147309
chr19:18264067-18264372	JUND	0.0361824	0.00596048
chr19:18271508-18272736	JUND	0.13549	5.70078e-07
chr19:18274420-18274663	JUND	0.0958589	5.00875e-05
chr19:18290243-18290916	JUND	0.111005	0.00021995
chr19:18291450-18292757	JUND	0.112922	0.000749924
chr19:18294469-18294910	JUND	0.0835154	0.00491844
chr19:18303348-18305595	JUND	0.0889269	0.0023592
chr19:41318549-41319573	TGFB1	0.0402643	0.000232508
chr19:41321669-41322030	TGFB1	0.0259576	0.022705
chr19:41325110-41325353	TGFB1	0.0379816	0.0184944
chr19:41326274-41326599	TGFB1	0.0401353	0.01611
chr19:41327235-41328790	TGFB1	0.0488092	0.00774529
chr19:41334503-41335792	TGFB1	0.0472761	0.000221686
chr19:41336308-41336632	TGFB1	0.035558	0.000256274
chr19:41341346-41343189	TGFB1	0.0356428	0.021072
chr19:41352449-41353104	TGFB1	0.0498543	0.00185998
chr21:46559129-46560080	S100B	0.0482232	0.000230102
chr21:46566074-46567743	S100B	0.0333145	0.001407
chr21:46569100-46569346	S100B	0.0346675	0.000255408
chr21:46588302-46588581	S100B	0.0251639	0.00623277
chr21:46595483-46595662	S100B	0.0197429	0.0392361
chr21:46597737-46598248	S100B	0.0255966	0.0172226
chr21:46604913-46606731	S100B	0.0623106	5.53207e-09
chr21:46610468-46610650	S100B	0.0236468	0.0115167
chr21:46617275-46617624	S100B	0.0286903	0.00365607
chr21:46621845-46622947	S100B	0.0458917	7.71686e-05
chr21:46638171-46638695	S100B	0.022636	0.0212332
chrX:1434980-1436108	P2RY8	0.0316323	0.00928662
chrX:1445923-1447763	P2RY8	0.0215523	0.0371778
chrX:1464042-1465240	P2RY8	0.0300062	0.0246937
chrX:1467131-1467575	P2RY8	0.0292371	0.0115845
chrX:1471768-1472388	P2RY8	0.0311382	0.0144737
chrX:1480154-1480421	P2RY8	0.0329297	0.00530292
chrX:1491820-1492888	P2RY8	0.0251035	0.0371452
chrX:1500733-1501567	P2RY8	0.0381205	0.00905038
chrX:1507400-1508431	P2RY8	0.0354249	0.00148039
chrX:1516472-1516721	P2RY8	0.0208854	0.0280003

## Sheet: Naive CD8+ T
PeakRanges	Gene	rObs	pvalZ
chr2:30153978-30154457	YPEL5	0.0337626	0.0254226
chr2:30158564-30158809	YPEL5	0.028981	0.0327352
chr2:30161481-30163841	YPEL5	0.123566	0.000474846
chr2:30171096-30171281	YPEL5	0.0246676	0.0229336
chr2:30171720-30173209	YPEL5	0.101847	3.42278e-06
chr2:30173785-30174271	YPEL5	0.0666212	9.70029e-06
chr2:30174799-30175244	YPEL5	0.0683912	2.27208e-07
chr2:30176996-30178333	YPEL5	0.0679148	3.19273e-05
chr2:30178637-30181398	YPEL5	0.0801119	1.5716e-06
chr2:60890744-60891930	REL	0.0287241	0.0107305
chr2:60897382-60898858	REL	0.0241516	0.00315826
chr2:60901378-60901617	REL	0.0220242	0.00105591
chr2:60904364-60905207	REL	0.0176483	0.0268569
chr2:60905826-60906857	REL	0.019835	0.0339537
chr2:60907307-60907902	REL	0.0172181	0.0238103
chr2:60910272-60911005	REL	0.0230649	0.00230634
chr2:60913412-60914378	REL	0.0195242	0.00656919
chr2:60914661-60915390	REL	0.0170717	0.022839
chr2:60917697-60917911	REL	0.011804	0.0464911
chr2:60919314-60919745	REL	0.0115883	0.0488747
chr2:60923626-60924174	REL	0.0227999	0.00130005
chr2:60926975-60927671	REL	0.0277036	6.30756e-05
chr2:95005806-95006112	MAL	0.0234283	0.000643835
chr2:95007626-95008471	MAL	0.0237822	0.00666744
chr2:95025113-95026351	MAL	0.0248299	0.00178644
chr2:95042675-95043786	MAL	0.0174535	0.0145251
chr2:95044513-95044839	MAL	0.0113116	0.0466788
chr2:95047452-95048138	MAL	0.0126896	0.0442364
chr2:95051425-95052015	MAL	0.017971	0.00437398
chr2:95052965-95054763	MAL	0.0192507	0.00374012
chr2:95061321-95063279	MAL	0.0311795	0.000233911
chr2:95074348-95075297	MAL	0.0283081	0.000103941
chr2:241088523-241089904	PASK	0.0657694	3.69051e-05
chr2:241095342-241096297	PASK	0.0554434	0.001141
chr2:241108646-241109489	PASK	0.0660026	4.3524e-05
chr2:241110546-241111702	PASK	0.0974706	5.32907e-15
chr2:241112400-241113085	PASK	0.107644	1.72154e-10
chr2:241123787-241124413	PASK	0.0260547	0.0188444
chr2:241125659-241126273	PASK	0.0206148	0.0297633
chr2:241127559-241128443	PASK	0.0342307	0.00144178
chr2:241149027-241150802	PASK	0.0429289	0.000352766
chr3:141887166-141888223	ATP1B3	0.0175063	0.010079
chr3:141888530-141889196	ATP1B3	0.0264774	0.000244523
chr3:141896949-141897263	ATP1B3	0.0151598	0.0249741
chr3:141899595-141901260	ATP1B3	0.0240388	0.00329764
chr3:141903097-141904134	ATP1B3	0.0257629	8.87145e-05
chr3:141907370-141907691	ATP1B3	0.0209183	0.00229074
chr3:141922531-141923502	ATP1B3	0.026923	0.000380104
chr3:141925190-141925417	ATP1B3	0.0135086	0.0135317
chr3:141925694-141925960	ATP1B3	0.0249937	0.000311301
chr4:38625463-38626336	KLF3	0.0202881	0.0273245
chr4:38648896-38649222	KLF3	0.0123441	0.024516
chr4:38654161-38655689	KLF3	0.038978	0.0249345
chr4:38663221-38664919	KLF3	0.0113501	0.0192792
chr4:38667012-38667592	KLF3	0.0334236	0.0167442
chr4:38671572-38671924	KLF3	0.0329557	0.00190286
chr4:38687501-38688253	KLF3	0.0193645	0.0236906
chr4:38690384-38690663	KLF3	0.0135158	0.0478391
chr4:38703312-38704357	KLF3	0.0157173	0.0217406
chr4:40183487-40184453	RHOH	0.0248257	0.00515389
chr4:40196537-40197278	RHOH	0.033455	0.048445
chr4:40197864-40198302	RHOH	0.0280981	0.012952
chr4:40200059-40201240	RHOH	0.0313985	0.0485613
chr4:40204205-40205854	RHOH	0.0316209	0.0251903
chr4:40207500-40207867	RHOH	0.0194304	0.0474123
chr4:40219719-40220332	RHOH	0.0217348	0.0199254
chr4:40225514-40226680	RHOH	0.0328647	0.0261512
chr4:40235038-40235275	RHOH	0.0234499	0.0192995
chr4:40238056-40239398	RHOH	0.0326882	0.0143784
chr4:81417694-81419459	RASGEF1B	0.0312573	0.00337416
chr4:81419787-81420194	RASGEF1B	0.0389171	2.61607e-06
chr4:81420961-81421932	RASGEF1B	0.0339523	0.000117087
chr4:81422585-81422894	RASGEF1B	0.0344307	1.88133e-07
chr4:81423233-81423421	RASGEF1B	0.0208867	0.0058647
chr4:81425429-81426483	RASGEF1B	0.0438963	1.7595e-06
chr4:81427367-81427691	RASGEF1B	0.0189984	0.00619757
chr4:81435444-81435996	RASGEF1B	0.0202492	0.00256261
chr4:81443079-81443266	RASGEF1B	0.0211607	0.00398385
chr4:81446643-81447134	RASGEF1B	0.0269999	0.000405555
chr4:81448135-81448525	RASGEF1B	0.017256	0.0303395
chr4:81451831-81452177	RASGEF1B	0.0250466	5.48139e-05
chr4:81454358-81455820	RASGEF1B	0.0275909	0.00334214
chr4:81462344-81462790	RASGEF1B	0.020251	0.0160878
chr4:81463704-81464097	RASGEF1B	0.0305078	0.000527041
chr5:95921603-95922219	ELL2	0.0271619	0.000239186
chr5:95923365-95923596	ELL2	0.0134187	0.0222393
chr5:95924795-95925521	ELL2	0.0221238	0.00365971
chr5:95927897-95929303	ELL2	0.0328167	2.18435e-06
chr5:95934290-95934667	ELL2	0.0136561	0.0315457
chr5:95945647-95946620	ELL2	0.0281207	0.000256146
chr5:95948107-95949091	ELL2	0.0232591	0.00588715
chr5:95952783-95953325	ELL2	0.0218895	0.000302958
chr5:95954631-95955112	ELL2	0.0134295	0.0357268
chr5:95960782-95962497	ELL2	0.0315942	0.0092388
chr5:98851879-98852279	CHD1	0.0162063	0.00292393
chr5:98854697-98855166	CHD1	0.0166588	0.0197632
chr5:98856329-98856678	CHD1	0.012659	0.036791
chr5:98861570-98862110	CHD1	0.017343	0.0217362
chr5:98879813-98881029	CHD1	0.0210871	0.00479886
chr5:98881485-98882181	CHD1	0.015172	0.0203997
chr5:98884936-98885375	CHD1	0.0145172	0.0187211
chr5:98889850-98890213	CHD1	0.0120614	0.0435544
chr5:98917266-98918267	CHD1	0.0191845	0.00497254
chr6:137819824-137820227	TNFAIP3	0.0922358	0.0111428
chr6:137830628-137830838	TNFAIP3	0.0269433	0.00342263
chr6:137866477-137868249	TNFAIP3	0.074959	8.25359e-05
chr6:137873280-137873703	TNFAIP3	0.0656119	0.0178396
chr6:137874743-137875368	TNFAIP3	0.0593711	0.0111144
chr6:137878566-137879596	TNFAIP3	0.0708526	0.0164093
chr6:137880280-137882981	TNFAIP3	0.141789	0.00107636
chr6:137883363-137883855	TNFAIP3	0.14249	3.86065e-08
chr6:158758466-158759486	EZR	0.0278588	0.0012587
chr6:158760115-158760466	EZR	0.0237092	0.0054331
chr6:158760787-158761362	EZR	0.0343709	7.63786e-05
chr6:158762818-158763522	EZR	0.0231745	0.0165316
chr6:158763884-158765951	EZR	0.0409821	0.00148797
chr6:158766721-158767457	EZR	0.0273359	0.00107368
chr6:158770075-158770353	EZR	0.0226801	0.0128434
chr6:158770650-158772496	EZR	0.0276231	0.011957
chr6:158773763-158774511	EZR	0.0266514	0.00192679
chr6:158777567-158778274	EZR	0.0185709	0.011958
chr6:158779708-158780161	EZR	0.0152848	0.0255371
chr6:158780611-158782402	EZR	0.0261571	0.00441945
chr6:158803734-158804560	EZR	0.0215441	0.0444312
chr6:158817838-158819767	EZR	0.0249512	0.0308626
chr7:1905856-1906970	MAD1L1	0.01197	0.041867
chr7:1919689-1920836	MAD1L1	0.0207089	0.0118856
chr7:1922087-1922479	MAD1L1	0.018292	0.0197335
chr7:1924248-1924477	MAD1L1	0.0252681	0.000476401
chr7:1925772-1927417	MAD1L1	0.0332466	0.00125748
chr7:1953269-1954479	MAD1L1	0.0127471	0.0100539
chr7:1956354-1956751	MAD1L1	0.0125214	0.022765
chr7:1969342-1970195	MAD1L1	0.0122503	0.0484664
chr7:1986275-1987284	MAD1L1	0.0195077	0.0158346
chr7:130912626-130914099	LINC-PINT	0.0676758	0.0323419
chr7:130922479-130922808	LINC-PINT	0.0176105	0.0305238
chr7:130927678-130928670	LINC-PINT	0.0219007	0.0233452
chr7:130932763-130933757	LINC-PINT	0.0218654	0.00779116
chr7:130934698-130935907	LINC-PINT	0.0276721	0.0243127
chr7:130938379-130938949	LINC-PINT	0.0287004	0.000558678
chr7:130947954-130948510	LINC-PINT	0.0350361	0.00215771
chr7:130949412-130950497	LINC-PINT	0.0280894	0.00347657
chr7:130955228-130955417	LINC-PINT	0.0267203	0.00391967
chr7:130960288-130960760	LINC-PINT	0.0350682	0.0255346
chr7:130960969-130961756	LINC-PINT	0.0600596	0.0350756
chr8:30057725-30058379	SARAF	0.0337962	0.00638634
chr8:30073069-30073257	SARAF	0.0308561	0.0421025
chr8:30076181-30077381	SARAF	0.0638863	0.00410355
chr8:30092819-30093294	SARAF	0.05464	0.0200321
chr8:30094796-30095927	SARAF	0.0663711	0.00152592
chr8:30110391-30110614	SARAF	0.0196947	0.012699
chr8:30111995-30112246	SARAF	0.0257527	0.00330211
chr8:30113087-30113980	SARAF	0.0266334	0.0319528
chr9:99821260-99822202	NR4A3	0.0377997	0.00138188
chr9:99828062-99829335	NR4A3	0.0296195	0.00758104
chr9:99829704-99830207	NR4A3	0.0304465	0.00301614
chr9:99831124-99831320	NR4A3	0.0214037	0.00326406
chr9:99834660-99835893	NR4A3	0.0236565	0.00611582
chr9:99836161-99836839	NR4A3	0.0476169	2.86968e-10
chr9:99838056-99838414	NR4A3	0.0168856	0.006139
chr9:99839945-99840633	NR4A3	0.0338973	0.000120956
chr9:99841091-99841914	NR4A3	0.03313	0.000188548
chr9:99849703-99849961	NR4A3	0.0274948	0.0006281
chr9:99850832-99852255	NR4A3	0.0421356	0.00221074
chr9:99855733-99856017	NR4A3	0.0182527	0.0456651
chr9:99858139-99858524	NR4A3	0.0152066	0.0317477
chr9:99867733-99867983	NR4A3	0.0386689	1.00689e-07
chr9:70391953-70392625	KLF9	0.0245609	0.00368764
chr9:70397186-70399085	KLF9	0.0236843	0.0123706
chr9:70406059-70406891	KLF9	0.014668	0.043541
chr9:70412221-70414503	KLF9	0.0364881	3.788e-05
chr9:70418842-70420880	KLF9	0.068118	1.05471e-14
chr9:70421631-70422087	KLF9	0.0290238	0.00157642
chr9:70427709-70428000	KLF9	0.0247871	1.79735e-05
chr9:70433929-70434308	KLF9	0.0176014	0.00122956
chr12:44827617-44828561	NELL2	0.0614003	0.00974745
chr12:44835066-44836501	NELL2	0.0420486	0.00520939
chr12:44836885-44837722	NELL2	0.0341415	0.00511224
chr12:44842547-44843066	NELL2	0.0237837	0.0251999
chr12:44847603-44848772	NELL2	0.0434293	0.0113715
chr12:44855428-44857891	NELL2	0.0218026	0.0362234
chr12:44874057-44874357	NELL2	0.0263534	0.0247875
chr12:44874999-44877135	NELL2	0.0395764	0.0029021
chr12:47191926-47192673	PCED1B-AS1	0.0245154	0.0296661
chr12:47192999-47194425	PCED1B-AS1	0.0272593	0.0499844
chr12:47205894-47206594	PCED1B-AS1	0.0295331	0.0102906
chr12:47211618-47212738	PCED1B-AS1	0.0426507	0.00377495
chr12:47215286-47216801	PCED1B-AS1	0.0429452	0.0216048
chr12:47217625-47218729	PCED1B-AS1	0.0313931	0.0299781
chr12:47222744-47223983	PCED1B-AS1	0.0255466	0.0332873
chr12:47224685-47225126	PCED1B-AS1	0.0222082	0.00551311
chr12:47226268-47226563	PCED1B-AS1	0.0221146	0.0172331
chr12:47229144-47230130	PCED1B-AS1	0.0272889	0.00410736
chr12:47236177-47236983	PCED1B-AS1	0.0175882	0.0299491
chr12:92105030-92106455	BTG1	0.0210881	0.0498589
chr12:92106663-92108228	BTG1	0.0247327	0.0290858
chr12:92111757-92112389	BTG1	0.0230023	0.0146842
chr12:92114796-92115279	BTG1	0.0215839	0.0184911
chr12:92115950-92116786	BTG1	0.0201243	0.0143481
chr12:92118754-92119824	BTG1	0.0257652	0.0283307
chr12:92121634-92122398	BTG1	0.0278762	0.0144622
chr12:92122763-92123162	BTG1	0.0205674	0.0307614
chr12:92123556-92125156	BTG1	0.0471379	0.00011347
chr12:92129642-92131502	BTG1	0.0367861	0.0154662
chr12:92132219-92132757	BTG1	0.0378437	0.00803252
chr12:92133378-92135045	BTG1	0.0431826	0.0145527
chr12:122844357-122844694	VPS37B	0.015985	0.0432489
chr12:122845003-122845969	VPS37B	0.0258813	0.00122132
chr12:122846493-122847043	VPS37B	0.022191	0.00266436
chr12:122847405-122848232	VPS37B	0.0224186	0.00521997
chr12:122848577-122849574	VPS37B	0.0226248	0.00705957
chr12:122852337-122852538	VPS37B	0.0373937	0.000315349
chr12:122853585-122854006	VPS37B	0.0305861	6.2701e-06
chr12:122854588-122855250	VPS37B	0.0340429	0.000446233
chr12:122859811-122860840	VPS37B	0.0267739	0.0257652
chr12:122861407-122861592	VPS37B	0.0304387	2.55097e-05
chr12:122864651-122864834	VPS37B	0.0196841	0.00921823
chr12:122865444-122866690	VPS37B	0.021576	0.0477115
chr12:122880768-122881510	VPS37B	0.0207199	0.0370285
chr12:122888041-122889102	VPS37B	0.0450402	0.0273963
chr12:122890255-122890551	VPS37B	0.0221404	0.0383704
chr14:35030001-35030367	FAM177A1	0.01357	0.0178097
chr14:35053814-35054032	FAM177A1	0.0186034	0.00244592
chr14:35059809-35060117	FAM177A1	0.0129901	0.0421654
chr14:35064686-35065044	FAM177A1	0.014513	0.0447801
chr14:35076734-35077039	FAM177A1	0.0129467	0.0402257
chr14:35084060-35084322	FAM177A1	0.0123358	0.0323356
chr14:35084698-35085054	FAM177A1	0.0210928	0.000930682
chr14:35086648-35086908	FAM177A1	0.0100108	0.026617
chr15:92844995-92845593	LINC01578	0.0333881	0.0236731
chr15:92883370-92883987	LINC01578	0.0467173	0.0436342
chr15:92889673-92891800	LINC01578	0.0243406	0.0456871
chr15:92893674-92895230	LINC01578	0.0366186	0.00794723
chr15:92906622-92906919	LINC01578	0.038715	0.0299269
chr15:92914517-92915499	LINC01578	0.0541127	0.0065577
chr15:92916010-92916241	LINC01578	0.0198068	0.0304183
chr15:92922352-92923419	LINC01578	0.0355908	0.00280401
chr15:92931310-92931533	LINC01578	0.0125828	0.041387
chr15:65678725-65679342	DENND4A	0.0150176	0.0215013
chr15:65679660-65680001	DENND4A	0.0117701	0.0364173
chr15:65681645-65682780	DENND4A	0.0139395	0.0448496
chr15:65703443-65703802	DENND4A	0.0205894	0.00223929
chr15:65718823-65719030	DENND4A	0.0194237	0.00115432
chr15:65724714-65724968	DENND4A	0.0136128	0.0356529
chr15:65726735-65727667	DENND4A	0.0206273	0.00167657
chr15:65771602-65771887	DENND4A	0.0150575	0.0397532
chr15:65772440-65773879	DENND4A	0.0201225	0.0124388
chr16:4380037-4381269	CORO7	0.0268885	0.000137401
chr16:4381722-4383133	CORO7	0.023077	0.00353314
chr16:4383667-4384885	CORO7	0.0193013	0.00967243
chr16:4391538-4392890	CORO7	0.0165834	0.046486
chr16:4394408-4395721	CORO7	0.0229882	0.00343319
chr16:4402450-4405917	CORO7	0.0338017	0.00177059
chr16:4408995-4409568	CORO7	0.0245602	0.00731909
chr16:4414170-4414921	CORO7	0.0303399	0.0309341
chr16:4415839-4417093	CORO7	0.0259486	0.00551866
chr16:4425109-4426334	CORO7	0.022086	0.0216079
chr16:4460537-4461087	CORO7	0.0215665	0.00109119
chr16:11512800-11513277	LITAF	0.0137441	0.0235666
chr16:11537465-11539992	LITAF	0.0238212	0.0136593
chr16:11543667-11544341	LITAF	0.0257832	0.000163806
chr16:11544972-11546063	LITAF	0.0208519	0.00388922
chr16:11551295-11551753	LITAF	0.0109206	0.0453761
chr16:11557364-11557737	LITAF	0.0301743	0.00480907
chr16:11560452-11561604	LITAF	0.0412596	0.0125021
chr16:11571955-11573026	LITAF	0.0550007	3.35948e-05
chr16:11575567-11575783	LITAF	0.0210165	0.0155953
chr16:11581824-11582491	LITAF	0.024403	0.0288109
chr16:11584197-11587710	LITAF	0.032499	0.017579
chr17:46145706-46146965	KANSL1-AS1	0.0326047	0.00161238
chr17:46153711-46154966	KANSL1-AS1	0.0333749	0.00128128
chr17:46162708-46165075	KANSL1-AS1	0.0249711	0.00838354
chr17:46172750-46174308	KANSL1-AS1	0.01551	0.0430565
chr17:46175207-46175503	KANSL1-AS1	0.0200074	0.00796177
chr17:46179038-46179995	KANSL1-AS1	0.0305961	0.000208706
chr17:46181051-46181725	KANSL1-AS1	0.0165211	0.0409591
chr17:46182862-46183329	KANSL1-AS1	0.0243767	0.0054758
chr17:46184396-46184938	KANSL1-AS1	0.021889	0.0101161
chr17:46186674-46187366	KANSL1-AS1	0.0220412	0.0370056
chr17:46193179-46195177	KANSL1-AS1	0.0659892	4.00691e-05
chr17:46224739-46225718	KANSL1-AS1	0.0607154	7.15579e-09
chr17:35849256-35850440	CCL5	0.0275296	0.0321759
chr17:35856795-35856995	CCL5	0.0180572	0.00653221
chr17:35864473-35865548	CCL5	0.0225717	0.0283711
chr17:35879817-35880726	CCL5	0.047098	1.41765e-06
chr17:35889681-35891755	CCL5	0.0246963	0.0485976
chr17:35892238-35892633	CCL5	0.0385315	4.86622e-06
chr17:35896111-35896602	CCL5	0.027458	0.00412834
chr17:35897897-35899224	CCL5	0.0312918	0.00859686
chr17:35900302-35901212	CCL5	0.0387013	0.00315209
chr17:40531249-40531453	CCR7	0.0200122	0.0189308
chr17:40542597-40543100	CCR7	0.026853	0.00509608
chr17:40549641-40549960	CCR7	0.0157473	0.0263694
chr17:40560167-40561180	CCR7	0.0397435	0.000695469
chr17:40563553-40564560	CCR7	0.0316647	0.0144085
chr17:40577607-40578059	CCR7	0.020639	0.0489219
chr17:40586228-40586674	CCR7	0.0256478	0.012761
chr17:40605320-40605738	CCR7	0.0397713	0.00421075
chr17:40607632-40608722	CCR7	0.0280394	0.0473759
chr17:78795109-78795406	USP36	0.0175438	0.0152872
chr17:78797869-78798342	USP36	0.0125348	0.0351434
chr17:78802984-78804100	USP36	0.0410127	1.97355e-05
chr17:78805427-78805772	USP36	0.0141353	0.0334723
chr17:78806406-78807028	USP36	0.0315566	0.00176544
chr17:78816976-78817691	USP36	0.0418494	0.00488597
chr17:78828376-78828822	USP36	0.0157324	0.00833333
chr17:78860165-78860391	USP36	0.0108053	0.0430756
chr17:78872492-78872716	USP36	0.0126258	0.0474185
chr18:48900485-48900686	SMAD7	0.0208643	0.00188635
chr18:48915713-48915966	SMAD7	0.0363037	2.8904e-06
chr18:48917213-48917791	SMAD7	0.0498843	1.97429e-06
chr18:48918987-48919387	SMAD7	0.0420033	2.16321e-08
chr18:48922492-48923514	SMAD7	0.0300564	0.0125104
chr18:48924272-48924884	SMAD7	0.0328974	0.0012687
chr18:48928556-48929434	SMAD7	0.0382203	0.0330793
chr18:48934808-48935502	SMAD7	0.027303	0.0140795
chr18:48948472-48950518	SMAD7	0.0389764	0.00222293
chr18:48951174-48953320	SMAD7	0.058257	0.00011414
chr18:48962369-48964032	SMAD7	0.0264697	0.0136566
chr18:48975416-48976633	SMAD7	0.0285914	0.0329718
chr19:16313945-16314159	KLF2	0.0200391	0.027041
chr19:16319290-16319951	KLF2	0.0585924	0.0402329
chr19:16324215-16325477	KLF2	0.0619396	0.0232163
chr19:16325831-16327152	KLF2	0.0777536	0.00246656
chr19:16329097-16329489	KLF2	0.0780997	0.0152391
chr19:16330227-16331291	KLF2	0.0791143	0.0159081
chr19:16338139-16339403	KLF2	0.0567401	0.0325862
chr19:16355301-16355764	KLF2	0.0352823	0.0463437
chr19:16359790-16360265	KLF2	0.0283006	0.0181799
chr19:16367291-16367546	KLF2	0.0609527	0.0471633
chr21:46559168-46560126	S100B	0.038632	0.00951079
chr21:46561193-46561973	S100B	0.0243152	0.0352152
chr21:46568123-46568488	S100B	0.0136103	0.015949
chr21:46594929-46595259	S100B	0.0167333	0.0113086
chr21:46597812-46598384	S100B	0.0348215	7.58142e-05
chr21:46598923-46600160	S100B	0.0230233	0.0186922
chr21:46604697-46606692	S100B	0.07215	2.10235e-05
chr21:46626347-46627178	S100B	0.04911	0.003112
chrX:1419104-1419940	P2RY8	0.0158959	0.0201048
chrX:1421899-1422393	P2RY8	0.0154987	0.0261089
chrX:1435500-1436109	P2RY8	0.0156547	0.0221584
chrX:1462637-1463466	P2RY8	0.0245311	0.0462696
chrX:1468323-1468745	P2RY8	0.0197395	0.0273821
chrX:1471706-1472416	P2RY8	0.0354208	0.00148164
chrX:1481441-1482563	P2RY8	0.0280409	0.0248672
chrX:1500694-1501531	P2RY8	0.015555	0.0177136
chrX:1506031-1506720	P2RY8	0.0184159	0.00608987
chrX:149480792-149481008	IDS	0.0124367	0.0389121
chrX:149483693-149484413	IDS	0.014072	0.0296002
chrX:149484985-149485412	IDS	0.0330433	1.44542e-05
chrX:149486038-149486844	IDS	0.0280769	0.00113929
chrX:149487140-149489085	IDS	0.0271367	0.00290126
chrX:149492266-149495308	IDS	0.0376049	0.000164419
chrX:149495707-149496886	IDS	0.0224145	0.0357993
chrX:149497130-149497925	IDS	0.0165169	0.0300557
chrX:149521395-149521796	IDS	0.022207	0.0389029
chrX:149546065-149546461	IDS	0.0128522	0.0346158

## Sheet: CD8+ GZMK+ T
PeakRanges	Gene	rObs	pvalZ
chr3:4977030-4979910	BHLHE40	0.234642	1.29733e-07
chr3:4983825-4984468	BHLHE40	0.177958	0.0016571
chr3:5002266-5003003	BHLHE40	0.289287	1.31457e-06
chr3:5006698-5007136	BHLHE40	0.146256	0.00452743
chr3:5010778-5011273	BHLHE40	0.119552	0.00719033
chr3:5011547-5012341	BHLHE40	0.146861	0.00381203
chr3:5016626-5017039	BHLHE40	0.109626	0.0125157
chr3:5026146-5027249	BHLHE40	0.140089	0.00381525
chr7:901157-901792	ADAP1	0.0837707	0.020941
chr7:907528-908044	ADAP1	0.0625829	0.0319966
chr7:914884-915329	ADAP1	0.0730461	0.0499043
chr7:924760-924983	ADAP1	0.0866007	0.0163417
chr7:925675-926032	ADAP1	0.134273	0.000918941
chr7:929840-930426	ADAP1	0.12082	0.00882969
chr7:936055-937074	ADAP1	0.134609	0.00144621
chr7:939920-940373	ADAP1	0.121957	0.00276314
chr7:953601-955008	ADAP1	0.0939357	0.0232082
chr17:40510389-40510584	CCR7	0.0938876	0.00251169
chr17:40531048-40531964	CCR7	0.0994944	0.0421843
chr17:40533240-40533999	CCR7	0.103734	0.0263028
chr17:40561839-40562361	CCR7	0.0697056	0.0480985
chr17:40565127-40565806	CCR7	0.123641	0.00684397
chr17:40572213-40572417	CCR7	0.0875492	0.0092315
chr17:40588566-40588969	CCR7	0.116687	0.00693352
chr17:40598697-40599523	CCR7	0.102555	0.0342325
chr17:40602644-40603332	CCR7	0.0937361	0.0345452

## Sheet: CD8+ TEMRA
PeakRanges	Gene	rObs	pvalZ
chr2:213065954-213066690	IKZF2	0.0938862	0.000173022
chr2:213078602-213079050	IKZF2	0.102529	7.07854e-05
chr2:213083275-213083600	IKZF2	0.0813764	0.00530329
chr2:213085690-213086034	IKZF2	0.0897856	0.00144738
chr2:213098983-213099176	IKZF2	0.0909841	0.00128189
chr2:213104059-213104833	IKZF2	0.131517	7.19526e-06
chr2:213118901-213119981	IKZF2	0.0752576	0.0147188
chr2:213125860-213126407	IKZF2	0.117715	4.62977e-05
chr2:213129799-213130005	IKZF2	0.0589351	0.00582502
chr2:213132635-213132828	IKZF2	0.0732237	0.00529968
chr2:213133220-213133668	IKZF2	0.0699653	0.00609678
chr2:213134262-213134455	IKZF2	0.0620099	0.00799277
chr2:213145708-213146115	IKZF2	0.133402	8.44133e-07
chr18:48913134-48913599	SMAD7	0.0390429	0.0225713
chr18:48913875-48914057	SMAD7	0.0509778	0.00812411
chr18:48915722-48915918	SMAD7	0.0462321	0.0311897
chr18:48918960-48919616	SMAD7	0.058567	0.00599478
chr18:48924304-48924868	SMAD7	0.0638133	0.00332235
chr18:48951369-48953167	SMAD7	0.074635	0.0010893
chr18:48963406-48963716	SMAD7	0.0304641	0.0445935
chr18:48990350-48991032	SMAD7	0.0428852	0.0405798

## Sheet: MAIT
PeakRanges	Gene	rObs	pvalZ
chr16:87826415-87826812	SLC7A5	0.0487823	0.0389948
chr16:87827172-87827373	SLC7A5	0.0597676	0.0126348
chr16:87827965-87828149	SLC7A5	0.0438706	0.0416792
chr16:87832938-87833337	SLC7A5	0.0509625	0.0204855
chr16:87834871-87835338	SLC7A5	0.0573215	0.0291741
chr16:87859013-87859292	SLC7A5	0.0649452	0.0135933
chr16:87875121-87875436	SLC7A5	0.0677945	0.00601836
chr16:87895502-87896432	SLC7A5	0.0571137	0.0351894

## Sheet: Naive CD4+ T
PeakRanges	Gene	rObs	pvalZ
chr1:22018787-22019559	CDC42	0.0326624	0.0233554
chr1:22024393-22026344	CDC42	0.025624	0.00701328
chr1:22031260-22032209	CDC42	0.0343594	0.0117215
chr1:22045146-22045693	CDC42	0.0122276	0.022415
chr1:22052334-22054100	CDC42	0.0204534	0.0311785
chr1:22060080-22060314	CDC42	0.010901	0.0179443
chr1:22064366-22065175	CDC42	0.0158971	0.0172073
chr1:22070328-22070606	CDC42	0.0107629	0.0175812
chr1:22089165-22090563	CDC42	0.0184465	0.0395875
chr1:22097721-22098208	CDC42	0.00997309	0.0376049
chr1:113878967-113879466	HIPK1	0.00792663	0.0372085
chr1:113928945-113931836	HIPK1	0.0286025	0.00212416
chr1:113938689-113939441	HIPK1	0.00970562	0.0465557
chr1:113958105-113958387	HIPK1	0.0084823	0.0166209
chr1:113972763-113973585	HIPK1	0.012546	0.000635198
chr1:113975184-113976143	HIPK1	0.0108962	0.011906
chr1:113976553-113977288	HIPK1	0.011267	0.0304202
chr1:113978044-113979736	HIPK1	0.011646	0.0394676
chr1:54287170-54287955	SSBP3	0.0140477	0.0411734
chr1:54297615-54299293	SSBP3	0.0106322	0.0433914
chr1:54314095-54314733	SSBP3	0.00955639	0.0115323
chr1:54356005-54357359	SSBP3	0.0168627	0.0101009
chr1:54365540-54365851	SSBP3	0.0108851	0.00104535
chr1:54371543-54372412	SSBP3	0.00917032	0.0373162
chr1:54372729-54373644	SSBP3	0.0120013	0.0304559
chr1:54378428-54379491	SSBP3	0.0106641	0.0287936
chr1:145978922-145980568	TXNIP	0.0510547	0.000919924
chr1:145988589-145989305	TXNIP	0.0252851	0.0399558
chr1:145990214-145991525	TXNIP	0.0388725	6.04084e-06
chr1:145996496-145997625	TXNIP	0.0529931	0.000380912
chr1:145998142-145998514	TXNIP	0.0414057	3.54363e-05
chr1:145999647-146000034	TXNIP	0.0298813	0.0176741
chr1:146006876-146007553	TXNIP	0.0619759	0.000239317
chr1:146035428-146036232	TXNIP	0.0270239	0.0442806
chr1:146036599-146038508	TXNIP	0.0246803	0.0465387
chr1:167468365-167468987	CD247	0.0215926	0.000205325
chr1:167471692-167471914	CD247	0.0188752	0.0076516
chr1:167473061-167473461	CD247	0.0133663	0.0473371
chr1:167481072-167483098	CD247	0.0314787	0.00214119
chr1:167483700-167485037	CD247	0.0173997	0.0417345
chr1:167491838-167492938	CD247	0.0366599	5.74682e-05
chr1:167499213-167500226	CD247	0.0212761	0.0248907
chr1:167501625-167502422	CD247	0.016934	0.048267
chr1:167505542-167505966	CD247	0.0138541	0.0337572
chr1:167509240-167511307	CD247	0.0426038	1.10431e-06
chr1:167516191-167519059	CD247	0.0291381	9.22129e-05
chr1:167527306-167528311	CD247	0.0133317	0.0280789
chr2:28764670-28765987	PPP1CB	0.0164611	0.0205257
chr2:28767314-28767533	PPP1CB	0.0110628	0.00997714
chr2:28769980-28770336	PPP1CB	0.0120985	0.0136516
chr2:28770687-28771559	PPP1CB	0.0151731	0.0129807
chr2:28775168-28775794	PPP1CB	0.0128073	0.0280547
chr2:28776179-28776667	PPP1CB	0.0110258	0.023963
chr2:28778375-28779007	PPP1CB	0.011703	0.041606
chr2:28780152-28780977	PPP1CB	0.0104112	0.0457488
chr2:28782968-28783202	PPP1CB	0.0124596	0.0154786
chr2:28784463-28785368	PPP1CB	0.0257659	0.00168146
chr2:28787213-28787579	PPP1CB	0.0110352	0.0157183
chr2:28788917-28790730	PPP1CB	0.0224101	0.00133934
chr2:28791100-28791420	PPP1CB	0.00863824	0.0357198
chr2:28792072-28792645	PPP1CB	0.0182042	0.00038713
chr2:28792945-28793295	PPP1CB	0.0107427	0.0159939
chr2:28794311-28794680	PPP1CB	0.0113502	0.0245803
chr2:28797654-28797975	PPP1CB	0.013364	0.00265545
chr2:28798272-28798646	PPP1CB	0.0155917	0.002118
chr2:28800276-28800518	PPP1CB	0.00811541	0.0261561
chr2:30158391-30158918	YPEL5	0.0330246	0.0432307
chr2:30161463-30163809	YPEL5	0.101884	7.36928e-05
chr2:30171171-30171482	YPEL5	0.0399493	9.46231e-05
chr2:30171665-30173226	YPEL5	0.0844646	0.000225506
chr2:30174795-30175311	YPEL5	0.0524403	3.99814e-07
chr2:30176981-30178394	YPEL5	0.0544999	9.73836e-05
chr2:30178632-30180581	YPEL5	0.0667128	2.98702e-08
chr2:30180917-30181380	YPEL5	0.0325072	2.04253e-06
chr2:30184210-30184416	YPEL5	0.0155913	0.00366733
chr2:30187498-30187724	YPEL5	0.0116911	0.0264658
chr2:60864621-60864939	REL	0.0077123	0.0403154
chr2:60883080-60883337	REL	0.0149794	0.0427882
chr2:60890057-60891991	REL	0.0155576	0.0313997
chr2:60899241-60899801	REL	0.0123539	0.00182287
chr2:60904429-60905253	REL	0.0107443	0.00847403
chr2:60905886-60906873	REL	0.0131675	0.0107707
chr2:60907209-60907836	REL	0.00919972	0.0254973
chr2:60911784-60912169	REL	0.00966873	0.00619791
chr2:60919298-60919643	REL	0.0100228	0.0188341
chr2:60927349-60927577	REL	0.0116567	0.003423
chr2:94997862-94998845	MAL	0.0242409	0.000959998
chr2:95005774-95006192	MAL	0.0072125	0.0144071
chr2:95007559-95008475	MAL	0.0199378	0.0011605
chr2:95021023-95021301	MAL	0.0153145	0.0010646
chr2:95025125-95026339	MAL	0.0133412	0.00249621
chr2:95032003-95032814	MAL	0.0064886	0.0335344
chr2:95034312-95035149	MAL	0.00930601	0.00494098
chr2:95038815-95040857	MAL	0.0163438	0.0083175
chr2:95041973-95043821	MAL	0.013345	0.0250339
chr2:95044641-95044842	MAL	0.00707876	0.0152457
chr2:95047483-95048091	MAL	0.00924296	0.0345752
chr2:95051211-95052068	MAL	0.0192293	0.00327346
chr2:95052943-95054722	MAL	0.025078	2.51922e-05
chr2:95057693-95058219	MAL	0.0288824	6.07973e-07
chr2:95061414-95063287	MAL	0.0129016	0.0239538
chr2:95074379-95075689	MAL	0.0145993	0.00596383
chr2:203914806-203915266	ICOS	0.0110248	0.0113406
chr2:203940178-203940999	ICOS	0.0250724	0.00363971
chr2:203945515-203946061	ICOS	0.0107942	0.0335299
chr2:203949006-203949553	ICOS	0.0266195	0.000543561
chr2:203950922-203951988	ICOS	0.0434186	0.0034804
chr2:203957423-203957782	ICOS	0.0111016	0.0127498
chr2:203958575-203960202	ICOS	0.0157097	0.0193606
chr2:203961830-203963862	ICOS	0.0119532	0.0395907
chr2:86815332-86816118	CD8B	0.0270982	1.7821e-07
chr2:86818779-86819576	CD8B	0.0352398	2.12288e-06
chr2:86825124-86826881	CD8B	0.0456439	3.1567e-08
chr2:86831832-86832108	CD8B	0.0147311	2.03321e-05
chr2:86834881-86835973	CD8B	0.0252661	4.35492e-07
chr2:86836745-86837960	CD8B	0.0193485	0.00426186
chr2:86842292-86843212	CD8B	0.0218664	3.9951e-05
chr2:86844668-86845088	CD8B	0.0155171	5.46361e-05
chr2:86847964-86848424	CD8B	0.012665	0.000380047
chr2:86860716-86862958	CD8B	0.0236613	4.69502e-06
chr2:156321492-156323207	NR4A2	0.0576306	0.00147469
chr2:156323797-156324016	NR4A2	0.0529481	9.65877e-10
chr2:156325479-156326176	NR4A2	0.0652915	2.97083e-06
chr2:156326995-156327867	NR4A2	0.0728878	6.07598e-05
chr2:156329285-156329502	NR4A2	0.0448653	0.00981747
chr2:156332314-156333448	NR4A2	0.106386	3.02963e-06
chr2:156334058-156335027	NR4A2	0.0965233	5.53499e-05
chr2:156341214-156343219	NR4A2	0.0842533	0.000216892
chr2:157407104-157407636	CYTIP	0.0249134	0.0395736
chr2:157420014-157421246	CYTIP	0.026103	0.0429213
chr2:157428513-157428931	CYTIP	0.0164191	0.0275287
chr2:157429973-157430737	CYTIP	0.0248776	0.000841094
chr2:157434598-157435000	CYTIP	0.0155819	0.044288
chr2:157439360-157440094	CYTIP	0.0349189	0.0127792
chr2:157440619-157442019	CYTIP	0.044369	0.0132515
chr2:157442306-157442527	CYTIP	0.0337839	0.00129086
chr2:190964201-190964861	STAT1	0.0237963	7.63056e-05
chr2:190970404-190972636	STAT1	0.0287571	1.92882e-06
chr2:190972915-190973937	STAT1	0.0209267	7.21406e-05
chr2:190974646-190975384	STAT1	0.0216345	1.55601e-05
chr2:190978392-190978911	STAT1	0.0159308	3.89518e-05
chr2:190984567-190985400	STAT1	0.02065	4.92901e-05
chr2:190987998-190988678	STAT1	0.0167135	0.0012025
chr2:190992654-190992932	STAT1	0.010386	0.0136713
chr2:190995250-190997434	STAT1	0.0178203	0.00971921
chr2:191003249-191004513	STAT1	0.0120099	0.0152756
chr2:191005292-191006629	STAT1	0.0109337	0.0131106
chr2:191013609-191014850	STAT1	0.0249961	0.000375086
chr2:191022486-191023613	STAT1	0.0302181	0.017068
chr2:234450578-234451201	ARL4C	0.0309289	0.0413041
chr2:234452062-234452978	ARL4C	0.034971	0.0268068
chr2:234453267-234453972	ARL4C	0.0398875	0.00174325
chr2:234483245-234484417	ARL4C	0.0411457	0.0345706
chr2:234488732-234489484	ARL4C	0.0697167	3.87408e-05
chr2:234494441-234495072	ARL4C	0.0422147	0.000331796
chr2:234495369-234495677	ARL4C	0.0453649	4.88908e-05
chr2:234496053-234497864	ARL4C	0.0750622	2.57204e-11
chr2:241088510-241089904	PASK	0.0755772	1.31723e-06
chr2:241095229-241096323	PASK	0.0383155	0.0150173
chr2:241108548-241109491	PASK	0.0741927	1.56746e-05
chr2:241110615-241110961	PASK	0.0865733	8.42331e-11
chr2:241111233-241111675	PASK	0.103449	2.76065e-11
chr2:241112535-241113034	PASK	0.147775	0
chr2:241123037-241123230	PASK	0.0114397	0.00367225
chr2:241123773-241124457	PASK	0.0557315	2.74578e-06
chr2:241126987-241128493	PASK	0.0611126	5.5574e-10
chr2:241149020-241150797	PASK	0.0461357	0.000183613
chr3:35633424-35633754	ARPP21	0.00660164	0.0167389
chr3:35639006-35640165	ARPP21	0.0205557	2.76779e-13
chr3:35642065-35642276	ARPP21	0.00776501	0.0134078
chr3:35646098-35646306	ARPP21	0.00541917	0.0491144
chr3:35647329-35647900	ARPP21	0.0103911	0.00293378
chr3:35651486-35652197	ARPP21	0.0104109	0.00166506
chr3:35654327-35654782	ARPP21	0.00810047	0.0427148
chr3:35659566-35660440	ARPP21	0.0130797	0.00172977
chr3:35664398-35665049	ARPP21	0.0145366	8.36805e-05
chr3:35665718-35666012	ARPP21	0.00657567	0.0356094
chr3:35677845-35678062	ARPP21	0.00540102	0.0303078
chr3:45848037-45848464	CCR9	0.0160433	5.53981e-06
chr3:45861152-45861549	CCR9	0.0083511	0.03449
chr3:45864835-45865445	CCR9	0.0172777	0.000225517
chr3:45869925-45870578	CCR9	0.020059	0.000980361
chr3:45879317-45880230	CCR9	0.0099012	0.00352076
chr3:45886075-45886977	CCR9	0.0226427	3.42578e-08
chr3:45890525-45891014	CCR9	0.00853192	0.039101
chr3:45892565-45893313	CCR9	0.0160303	0.00070214
chr3:45911975-45912254	CCR9	0.0314362	3.33067e-16
chr3:45915044-45916589	CCR9	0.00839683	0.035269
chr3:45921144-45922748	CCR9	0.00995126	0.0118748
chr3:60024438-60026491	FHIT	0.0115313	0.012156
chr3:60047548-60049098	FHIT	0.0148896	0.00622788
chr3:60055428-60057255	FHIT	0.0169974	0.00374517
chr3:60064358-60066189	FHIT	0.015088	0.00140152
chr3:60070987-60071177	FHIT	0.00538774	0.0443544
chr3:60071459-60071926	FHIT	0.00873111	0.00927249
chr3:60073408-60074233	FHIT	0.00909191	0.0186127
chr3:60074930-60075374	FHIT	0.00717316	0.037676
chr3:60078969-60079756	FHIT	0.0208455	0.000211098
chr3:60080272-60081231	FHIT	0.0128423	0.00184015
chr3:60090285-60091322	FHIT	0.011759	0.00458284
chr3:60094405-60095172	FHIT	0.0114571	0.00408858
chr3:60095459-60095949	FHIT	0.00744299	0.0310806
chr4:40152492-40152952	RHOH	0.0124216	0.0382886
chr4:40193153-40193687	RHOH	0.027742	0.00435144
chr4:40196542-40197282	RHOH	0.0258656	0.0301472
chr4:40197864-40198402	RHOH	0.0256757	0.0111795
chr4:40199315-40199610	RHOH	0.0177377	0.0281941
chr4:40200069-40201241	RHOH	0.0290938	0.000864307
chr4:40213810-40214582	RHOH	0.0271932	0.0209187
chr4:40219364-40220396	RHOH	0.0157495	0.00376888
chr4:40224508-40225166	RHOH	0.0142255	0.0124589
chr4:40228654-40229212	RHOH	0.0167082	0.00920096
chr4:40237424-40237648	RHOH	0.0125679	0.04221
chr4:40238058-40239408	RHOH	0.0259942	0.0166996
chr4:102500483-102502567	NFKB1	0.0222612	0.0222365
chr4:102512217-102512803	NFKB1	0.00908789	0.0224314
chr4:102518441-102519187	NFKB1	0.0200525	0.0162314
chr4:102521778-102522348	NFKB1	0.00975806	0.0158503
chr4:102524796-102525322	NFKB1	0.0150548	0.00187671
chr4:102528901-102529186	NFKB1	0.00791279	0.0293108
chr4:102533320-102533591	NFKB1	0.00993899	0.00089106
chr4:102533778-102535995	NFKB1	0.0117525	0.0239146
chr4:102544966-102545727	NFKB1	0.0112599	0.00370956
chr4:7827804-7829807	AFAP1	0.0137491	0.00380273
chr4:7843985-7844842	AFAP1	0.010711	0.0117836
chr4:7854642-7855561	AFAP1	0.0395604	5.63053e-09
chr4:7874132-7874502	AFAP1	0.00921513	0.00679997
chr4:7876125-7877449	AFAP1	0.0218702	2.06006e-06
chr4:7880604-7881073	AFAP1	0.0124161	0.000817461
chr4:7902429-7902692	AFAP1	0.00901895	0.00617925
chr4:7908715-7909106	AFAP1	0.0118642	0.000697042
chr4:7909372-7909683	AFAP1	0.0103837	0.000175079
chr4:75636373-75636679	G3BP2	0.00940872	0.0124477
chr4:75640149-75641587	G3BP2	0.0125128	0.0379014
chr4:75643664-75645010	G3BP2	0.0125802	0.00413395
chr4:75648067-75648498	G3BP2	0.0104484	0.0392071
chr4:75649729-75649942	G3BP2	0.00846492	0.0170865
chr4:75652430-75652787	G3BP2	0.0149833	0.0232786
chr4:75682718-75683537	G3BP2	0.0233435	0.045278
chr4:75703088-75703404	G3BP2	0.0106516	0.0317281
chr4:81417866-81419366	RASGEF1B	0.0264471	0.000482711
chr4:81419868-81420100	RASGEF1B	0.0237746	3.80034e-07
chr4:81421391-81422037	RASGEF1B	0.0399454	3.66374e-15
chr4:81422642-81423458	RASGEF1B	0.023601	8.55422e-05
chr4:81424231-81424816	RASGEF1B	0.0359552	5.18173e-09
chr4:81425377-81426009	RASGEF1B	0.025035	3.75599e-06
chr4:81429755-81430223	RASGEF1B	0.0147227	0.00102758
chr4:81448091-81448579	RASGEF1B	0.0173675	0.000898927
chr4:81448761-81449235	RASGEF1B	0.0209026	0.000274386
chr4:81450238-81451107	RASGEF1B	0.0195005	0.00202924
chr4:81451853-81452470	RASGEF1B	0.0136406	0.0133389
chr4:81453164-81454170	RASGEF1B	0.0174834	0.0035735
chr4:81454440-81455825	RASGEF1B	0.0226544	0.000271431
chr4:81459745-81462714	RASGEF1B	0.0302328	0.00603741
chr5:142096514-142096788	NDFIP1	0.0242971	0.0168558
chr5:142097768-142098116	NDFIP1	0.0309052	0.000352227
chr5:142117197-142118672	NDFIP1	0.0194642	0.0307772
chr5:142121592-142122361	NDFIP1	0.0120039	0.0462684
chr5:142133954-142134254	NDFIP1	0.0124515	0.0342325
chr5:142141630-142141878	NDFIP1	0.0123129	0.0225401
chr5:142143102-142144353	NDFIP1	0.0196556	0.0230954
chr5:142158160-142158357	NDFIP1	0.0108286	0.028405
chr5:56094452-56096014	ANKRD55	0.0158411	0.0429508
chr5:56102165-56102728	ANKRD55	0.0236107	0.00377563
chr5:56133383-56133720	ANKRD55	0.0123603	0.00163582
chr5:56147824-56149101	ANKRD55	0.0333556	0.00075581
chr5:56154102-56154357	ANKRD55	0.0138681	0.0178079
chr5:56154872-56155787	ANKRD55	0.0251175	0.00481916
chr5:56156404-56158048	ANKRD55	0.0261994	0.000703489
chr5:56158503-56158839	ANKRD55	0.0190085	0.00642514
chr5:56160191-56161213	ANKRD55	0.0245714	0.000394354
chr5:56167286-56168289	ANKRD55	0.0195264	0.00033215
chr5:56174770-56174980	ANKRD55	0.00978601	0.00932637
chr5:150383325-150384310	CD74	0.0104431	0.00857462
chr5:150386548-150386834	CD74	0.0149051	2.3909e-05
chr5:150387903-150388131	CD74	0.00904879	0.00646053
chr5:150389461-150390154	CD74	0.0105726	0.0114314
chr5:150391139-150392187	CD74	0.0128057	0.00159201
chr5:150392578-150392900	CD74	0.0114838	0.0131843
chr5:150393625-150394429	CD74	0.0245915	3.35144e-06
chr5:150394790-150395417	CD74	0.0154026	0.00372504
chr5:150397435-150398159	CD74	0.014697	0.010027
chr5:150398519-150400024	CD74	0.0278898	0.0018806
chr5:150400688-150401616	CD74	0.0193996	0.000488824
chr5:150401864-150403136	CD74	0.0147143	0.0235469
chr5:150404235-150404985	CD74	0.0137975	0.0252745
chr5:150412339-150413401	CD74	0.0325431	0.01236
chr5:150427458-150427739	CD74	0.00637646	0.048323
chr6:137819835-137820172	TNFAIP3	0.0948165	0.00187397
chr6:137836742-137837035	TNFAIP3	0.0096479	0.0309645
chr6:137866525-137868281	TNFAIP3	0.0760682	1.23487e-05
chr6:137873270-137873715	TNFAIP3	0.0758968	0.00161189
chr6:137874748-137875333	TNFAIP3	0.0563763	0.0106845
chr6:137877668-137877971	TNFAIP3	0.0460209	0.0323502
chr6:137878533-137879650	TNFAIP3	0.0854527	0.00776644
chr6:137880279-137882994	TNFAIP3	0.136674	0.000122625
chr6:137883360-137883871	TNFAIP3	0.118727	7.70013e-05
chr6:149449925-149452126	ZC3H12D	0.0156711	0.00803903
chr6:149458189-149458798	ZC3H12D	0.0076074	0.0239993
chr6:149465889-149466256	ZC3H12D	0.00917786	0.00214083
chr6:149473114-149474315	ZC3H12D	0.0140534	0.00311415
chr6:149481017-149481432	ZC3H12D	0.0274416	3.3832e-08
chr6:149484673-149485619	ZC3H12D	0.0335433	6.0072e-07
chr6:149494718-149495778	ZC3H12D	0.0276777	0.00045361
chr6:149503399-149503661	ZC3H12D	0.00719217	0.00914307
chr6:149508410-149508934	ZC3H12D	0.0284199	2.02089e-08
chr6:158756048-158756665	EZR	0.0110336	0.0113824
chr6:158758315-158758776	EZR	0.0127743	0.00637682
chr6:158758965-158759585	EZR	0.0183839	0.000247724
chr6:158760431-158761518	EZR	0.0247503	9.09561e-06
chr6:158762790-158763594	EZR	0.0283002	0.000133785
chr6:158763848-158765909	EZR	0.0352492	1.12401e-05
chr6:158766759-158767348	EZR	0.0205336	0.000395486
chr6:158776712-158777367	EZR	0.0119197	0.0284519
chr6:158777709-158778251	EZR	0.0089034	0.0480703
chr6:158795588-158796775	EZR	0.0134268	0.045056
chr6:158805868-158806423	EZR	0.0162227	0.00311937
chr6:158817286-158819783	EZR	0.0292126	0.0044474
chr6:166924235-166926050	RNASET2	0.0119727	0.0260059
chr6:166926341-166927370	RNASET2	0.0159864	0.000526651
chr6:166928749-166931353	RNASET2	0.016946	0.00180701
chr6:166935391-166935923	RNASET2	0.0494279	1.24202e-09
chr6:166936287-166937032	RNASET2	0.0397059	7.62946e-11
chr6:166941962-166942168	RNASET2	0.0208531	5.47721e-06
chr6:166942412-166943608	RNASET2	0.0386122	1.5445e-05
chr6:166949471-166950132	RNASET2	0.026238	0.000580843
chr6:166951057-166951584	RNASET2	0.0312615	0.00180432
chr6:166953054-166953313	RNASET2	0.040712	4.75532e-05
chr6:166955174-166955681	RNASET2	0.0487523	1.09252e-10
chr6:166959140-166959564	RNASET2	0.0273086	0.0013721
chr6:166969303-166970662	RNASET2	0.0472736	1.0461e-06
chr6:166973486-166974060	RNASET2	0.0369829	4.9627e-14
chr6:166976368-166976846	RNASET2	0.0128166	0.00120184
chr6:166987553-166989136	RNASET2	0.0291893	1.2138e-05
chr6:166989397-166990124	RNASET2	0.0384183	1.04206e-07
chr7:1895279-1896096	MAD1L1	0.00953225	0.00862912
chr7:1897028-1898259	MAD1L1	0.0109895	0.0172001
chr7:1898651-1900389	MAD1L1	0.0176085	1.61692e-05
chr7:1901485-1902277	MAD1L1	0.0144223	0.00050365
chr7:1905462-1907241	MAD1L1	0.0158069	0.00208769
chr7:1907703-1908945	MAD1L1	0.0131109	0.0138347
chr7:1912265-1912775	MAD1L1	0.0125374	0.00777582
chr7:1919691-1920921	MAD1L1	0.0250444	0.000394911
chr7:1922080-1922509	MAD1L1	0.0170128	0.0135413
chr7:1924246-1924473	MAD1L1	0.0257968	3.40396e-05
chr7:1925807-1927414	MAD1L1	0.0256994	0.0131257
chr7:1934454-1934907	MAD1L1	0.0474768	1.11022e-16
chr7:1938650-1941002	MAD1L1	0.0142002	0.00573082
chr7:1943319-1943622	MAD1L1	0.0264818	0.000132814
chr7:1950611-1951810	MAD1L1	0.0125172	0.0133139
chr7:1961675-1962318	MAD1L1	0.0142554	0.00314722
chr7:106257330-106258262	NAMPT	0.0149071	0.000839078
chr7:106259008-106261122	NAMPT	0.0219317	1.61214e-05
chr7:106263040-106263832	NAMPT	0.0147108	0.00090134
chr7:106264933-106265700	NAMPT	0.012969	8.65522e-05
chr7:106267955-106269837	NAMPT	0.0140078	0.00123043
chr7:106270324-106271257	NAMPT	0.0093978	0.0152155
chr7:106273172-106273870	NAMPT	0.00762235	0.0339068
chr7:106274548-106275051	NAMPT	0.0130979	0.000750949
chr7:106275773-106276118	NAMPT	0.010974	0.00156316
chr7:159058409-159058729	VIPR2	0.00946316	0.0149217
chr7:159070571-159071397	VIPR2	0.0245144	2.67578e-05
chr7:159083588-159085423	VIPR2	0.0222925	0.000379506
chr7:159093173-159093575	VIPR2	0.011458	0.0135127
chr7:159094178-159095490	VIPR2	0.0296697	1.81639e-06
chr7:159105979-159107270	VIPR2	0.0222791	1.29798e-08
chr7:159115496-159116172	VIPR2	0.0183893	0.000415271
chr7:159117595-159119392	VIPR2	0.0244442	0.000117888
chr7:159141905-159142251	VIPR2	0.0169902	0.00017697
chr7:159143053-159143303	VIPR2	0.0114247	0.00122394
chr7:159143902-159145768	VIPR2	0.0251683	1.56257e-05
chr8:42139763-42142100	AP3M2	0.0335721	0.0260646
chr8:42146490-42146791	AP3M2	0.0124686	0.0418343
chr8:42154212-42154403	AP3M2	0.0482403	7.2724e-08
chr8:42161035-42161479	AP3M2	0.0087202	0.0496806
chr8:42163226-42163614	AP3M2	0.0114928	0.00350936
chr8:42164020-42164880	AP3M2	0.0115549	0.0177118
chr8:42165898-42166776	AP3M2	0.0124949	0.0373106
chr8:42179653-42180671	AP3M2	0.0203788	0.000209834
chr8:30052481-30052756	SARAF	0.0260929	0.0217771
chr8:30056499-30057143	SARAF	0.0285938	0.0414589
chr8:30076188-30077393	SARAF	0.0659155	0.00735089
chr8:30092823-30093283	SARAF	0.0563097	0.00597487
chr8:30094765-30095911	SARAF	0.0703442	0.00242715
chr8:30099523-30100290	SARAF	0.0560114	0.046414
chr8:30103687-30104354	SARAF	0.0389253	0.0352809
chr8:30105740-30105957	SARAF	0.0191786	0.0156684
chr8:30110254-30110629	SARAF	0.0201582	0.0113625
chr8:30124999-30125285	SARAF	0.0191925	0.0107735
chr8:30127318-30127637	SARAF	0.0144413	0.0418022
chr8:100692121-100692822	PABPC1	0.00711358	0.0482735
chr8:100693810-100694112	PABPC1	0.00655113	0.0191999
chr8:100696874-100697506	PABPC1	0.0099981	0.0213303
chr8:100698677-100702710	PABPC1	0.030223	0.00784292
chr8:100703825-100706875	PABPC1	0.0219102	0.00961913
chr8:100708401-100708697	PABPC1	0.0133574	0.00461808
chr8:100710755-100712099	PABPC1	0.0140494	0.0456325
chr8:100712890-100714702	PABPC1	0.0131142	0.0362574
chr9:73149404-73149740	ANXA1	0.0327591	0.00046782
chr9:73151456-73152025	ANXA1	0.0586616	0.00419225
chr9:73154000-73155828	ANXA1	0.0659437	0.00633611
chr9:73163028-73163269	ANXA1	0.0227731	0.000172232
chr9:73163467-73163841	ANXA1	0.0266744	0.00381432
chr9:73166253-73168065	ANXA1	0.0302574	0.0076463
chr9:73168298-73169066	ANXA1	0.0358553	0.000778252
chr9:73170986-73171198	ANXA1	0.015155	0.00469481
chr9:73171833-73173250	ANXA1	0.0518327	2.19614e-07
chr9:73176560-73176762	ANXA1	0.0145427	0.00430992
chr9:99821115-99822192	NR4A3	0.036255	0.000305284
chr9:99828062-99829185	NR4A3	0.0173631	0.0132505
chr9:99829707-99830223	NR4A3	0.0160408	0.00448033
chr9:99831118-99831406	NR4A3	0.0130309	0.00108619
chr9:99833696-99834061	NR4A3	0.01503	0.0039356
chr9:99834580-99835001	NR4A3	0.0107247	0.0125709
chr9:99835367-99835745	NR4A3	0.00969542	0.0162695
chr9:99840155-99840557	NR4A3	0.0174566	1.07651e-05
chr9:99842390-99843805	NR4A3	0.0181094	3.4191e-05
chr9:99849696-99849982	NR4A3	0.0211266	2.90421e-05
chr9:99850762-99852397	NR4A3	0.0193221	0.00160465
chr9:99855613-99856022	NR4A3	0.00969114	0.0289837
chr9:70377871-70378356	KLF9	0.0104784	0.000444717
chr9:70391985-70392626	KLF9	0.0133163	0.00700933
chr9:70397220-70398983	KLF9	0.017302	0.00913563
chr9:70403647-70403971	KLF9	0.00847281	0.00855016
chr9:70412453-70412980	KLF9	0.0242751	0.000116388
chr9:70413185-70414504	KLF9	0.0384701	1.0641e-09
chr9:70418840-70420884	KLF9	0.0654201	0
chr9:70421633-70422059	KLF9	0.015983	0.0173941
chr10:6537572-6538117	PRKCQ-AS1	0.00626865	0.0177169
chr10:6569164-6570589	PRKCQ-AS1	0.00631548	0.0472843
chr10:6583357-6583930	PRKCQ-AS1	0.0198465	0.00107313
chr10:6586524-6586808	PRKCQ-AS1	0.00870114	0.0149606
chr10:6591607-6592718	PRKCQ-AS1	0.0079075	0.0403152
chr10:6597456-6597938	PRKCQ-AS1	0.0105667	0.0374579
chr10:6601353-6601835	PRKCQ-AS1	0.00790492	0.0368036
chr10:6606962-6607666	PRKCQ-AS1	0.00807549	0.023003
chr10:102610338-102610774	TRIM8	0.0466403	5.52754e-07
chr10:102612040-102613615	TRIM8	0.0546675	6.80423e-08
chr10:102620443-102622210	TRIM8	0.0183184	0.0105496
chr10:102632346-102634197	TRIM8	0.0253606	0.0230978
chr10:102648815-102649475	TRIM8	0.0260141	0.00959953
chr10:102658192-102658922	TRIM8	0.0167328	0.0179944
chr10:102659146-102659414	TRIM8	0.0130913	0.003524
chr10:102660215-102662054	TRIM8	0.0281366	0.00183618
chr10:110842622-110843971	PDCD4	0.026416	0.0302852
chr10:110869091-110869281	PDCD4	0.0269961	0.020519
chr10:110871528-110873212	PDCD4	0.0271642	0.00472717
chr10:110878550-110880680	PDCD4	0.0236765	0.0352988
chr10:110892688-110893114	PDCD4	0.0128489	0.0188323
chr10:110901002-110904502	PDCD4	0.0266419	0.00447883
chr10:110905300-110905605	PDCD4	0.0103986	0.0275425
chr10:110908527-110911400	PDCD4	0.0218377	0.00603522
chr10:110911697-110911989	PDCD4	0.0122638	0.0101469
chr10:117216392-117217789	SLC18A2	0.00690202	0.00859635
chr10:117237400-117237699	SLC18A2	0.00859869	0.0120486
chr10:117240783-117242186	SLC18A2	0.0122266	0.00139186
chr10:117246940-117248022	SLC18A2	0.0159576	3.82766e-05
chr10:117250300-117250839	SLC18A2	0.0204078	3.2094e-06
chr10:117259110-117260605	SLC18A2	0.0128694	0.00442277
chr10:117262962-117263316	SLC18A2	0.00760389	0.0378925
chr10:117284442-117285438	SLC18A2	0.0242406	2.60896e-10
chr10:117286283-117286939	SLC18A2	0.00835361	0.00549836
chr11:66619004-66619680	RBM4	0.0236688	0.0485118
chr11:66627550-66630702	RBM4	0.0191917	0.0135372
chr11:66645145-66645334	RBM4	0.00973694	0.0127469
chr11:66650043-66650544	RBM4	0.00961615	0.014598
chr11:66654151-66655792	RBM4	0.0138795	0.00749885
chr11:66656078-66656279	RBM4	0.00963152	0.0149353
chr11:66665381-66666370	RBM4	0.0119429	0.0029387
chr11:66666785-66667030	RBM4	0.00643815	0.0447119
chr11:66677399-66678906	RBM4	0.0176982	0.0246663
chr11:62499619-62500009	AHNAK	0.00842419	0.0490415
chr11:62505153-62505367	AHNAK	0.0176761	4.29406e-05
chr11:62508435-62508877	AHNAK	0.0135482	0.0063913
chr11:62513268-62513844	AHNAK	0.0221493	2.20688e-06
chr11:62514182-62514874	AHNAK	0.0243544	7.11844e-05
chr11:62534978-62535315	AHNAK	0.0129333	0.00139918
chr11:62535617-62536235	AHNAK	0.0149325	0.00528833
chr11:62537383-62537670	AHNAK	0.0101104	0.0384947
chr11:62544559-62546916	AHNAK	0.058829	0.00082017
chr11:62555300-62556015	AHNAK	0.0529113	0.00872327
chr11:62556383-62557096	AHNAK	0.0460868	0.00866112
chr11:62560588-62560940	AHNAK	0.0288626	0.0216369
chr12:8953871-8954500	KLRG1	0.0537237	0.000889501
chr12:8986700-8988270	KLRG1	0.0239114	0.0207003
chr12:8989423-8989986	KLRG1	0.0422805	5.12744e-06
chr12:8991738-8992643	KLRG1	0.0264477	0.00539447
chr12:8993897-8994905	KLRG1	0.0353939	1.99739e-05
chr12:8996731-8997171	KLRG1	0.032278	1.26738e-05
chr12:8997566-8997828	KLRG1	0.0094338	0.0304766
chr12:8999995-9000466	KLRG1	0.0140901	0.00810488
chr12:9002641-9003088	KLRG1	0.0166164	0.00293151
chr12:9032612-9033571	KLRG1	0.0139461	0.0418798
chr12:52006403-52008035	NR4A1	0.055402	1.2442e-05
chr12:52012789-52013478	NR4A1	0.0309009	0.00153084
chr12:52013935-52014707	NR4A1	0.0407165	4.43409e-05
chr12:52015146-52016248	NR4A1	0.0489811	0.000268679
chr12:52016811-52017025	NR4A1	0.0368439	1.78002e-06
chr12:52023044-52024142	NR4A1	0.0466003	0.0112372
chr12:52041795-52042799	NR4A1	0.0334297	0.0239335
chr12:52058663-52059214	NR4A1	0.0265865	1.69108e-07
chr12:52059656-52060798	NR4A1	0.0373949	2.40472e-08
chr12:119996367-119998259	BICDL1	0.0365023	1.16367e-05
chr12:119998457-119999212	BICDL1	0.0306524	1.07954e-06
chr12:120006511-120007841	BICDL1	0.0502215	0.0437575
chr12:120012084-120012650	BICDL1	0.0785076	1.22119e-06
chr12:120013505-120014379	BICDL1	0.0631346	0.000612354
chr12:120015323-120015616	BICDL1	0.0432764	0.000127692
chr12:120021519-120021732	BICDL1	0.0138373	8.49043e-05
chr12:120026601-120026889	BICDL1	0.0129311	0.012982
chr12:7912197-7912638	SLC2A3	0.0117334	0.0346243
chr12:7916049-7920144	SLC2A3	0.0692546	0.00015716
chr12:7921091-7921733	SLC2A3	0.0198187	0.0182999
chr12:7921959-7922169	SLC2A3	0.0185905	0.0173308
chr12:7922603-7924046	SLC2A3	0.0401892	0.00515328
chr12:7924356-7925466	SLC2A3	0.0174665	0.0186175
chr12:7925862-7926644	SLC2A3	0.0256197	0.0136407
chr12:7927524-7928527	SLC2A3	0.0237429	0.0225215
chr12:7972101-7972676	SLC2A3	0.0200668	0.00808074
chr12:44827608-44828556	NELL2	0.0618935	5.89301e-05
chr12:44835072-44836501	NELL2	0.0308932	0.00331614
chr12:44836908-44837756	NELL2	0.0281699	5.65098e-05
chr12:44842626-44843043	NELL2	0.0225727	2.78743e-05
chr12:44847597-44848689	NELL2	0.0656996	1.68283e-06
chr12:44853971-44854406	NELL2	0.0142017	0.00234585
chr12:44856590-44857068	NELL2	0.0134652	0.0024055
chr12:44863874-44864426	NELL2	0.0293436	0.0147572
chr12:44874052-44874364	NELL2	0.0353662	1.99424e-07
chr12:44874982-44877152	NELL2	0.0717238	4.52101e-10
chr12:47167793-47168033	PCED1B-AS1	0.00896694	0.0358305
chr12:47211965-47212604	PCED1B-AS1	0.0368774	0.000571264
chr12:47215278-47216829	PCED1B-AS1	0.0551216	0.00432326
chr12:47217624-47218724	PCED1B-AS1	0.031911	0.00540091
chr12:47222531-47224014	PCED1B-AS1	0.0207641	0.0181054
chr12:47224781-47224968	PCED1B-AS1	0.0102495	0.00357185
chr12:47226286-47226582	PCED1B-AS1	0.0101849	0.0200346
chr12:47229159-47230168	PCED1B-AS1	0.0156352	0.044805
chr12:92109723-92110617	BTG1	0.0140473	0.0342998
chr12:92118741-92119785	BTG1	0.0198641	0.015914
chr12:92121683-92122388	BTG1	0.0254512	0.000145124
chr12:92122765-92123162	BTG1	0.0158164	0.0191382
chr12:92123539-92125218	BTG1	0.0318918	0.00194261
chr12:92127179-92127484	BTG1	0.0142896	0.0243531
chr12:92128985-92131448	BTG1	0.0349571	0.0337406
chr12:92132149-92132786	BTG1	0.0383861	0.00164504
chr12:92133321-92134257	BTG1	0.0239555	0.0309215
chr12:92137147-92138489	BTG1	0.0329869	0.0378896
chr12:122842769-122843145	VPS37B	0.0124985	0.00575213
chr12:122844267-122844668	VPS37B	0.00821812	0.0228294
chr12:122844939-122845938	VPS37B	0.0166276	0.00886727
chr12:122847411-122848325	VPS37B	0.0162244	0.00330715
chr12:122848603-122850282	VPS37B	0.0196689	0.00271184
chr12:122852237-122852645	VPS37B	0.0162154	0.000258688
chr12:122853325-122854093	VPS37B	0.0107894	0.00917661
chr12:122854633-122855293	VPS37B	0.0229135	0.000689873
chr12:122862967-122863299	VPS37B	0.0176937	0.0028863
chr12:122864605-122865079	VPS37B	0.0170625	0.00687093
chr12:122865454-122867149	VPS37B	0.0249122	0.0114815
chr12:122888041-122889102	VPS37B	0.0345046	0.0165909
chr12:122901565-122901943	VPS37B	0.0161269	0.00482917
chr13:41456822-41459129	RGCC	0.0748503	8.39228e-06
chr13:41462869-41464360	RGCC	0.0670843	0.00922345
chr13:41464902-41465711	RGCC	0.0638991	0.00476579
chr13:41466022-41466324	RGCC	0.0405665	0.0135204
chr13:41470156-41470636	RGCC	0.0539822	7.09007e-05
chr13:41470992-41471419	RGCC	0.039187	0.000439435
chr13:41471752-41472603	RGCC	0.0559461	1.90423e-07
chr13:41492328-41493630	RGCC	0.0519537	0.0359359
chr13:99290586-99291349	GPR183	0.0350196	0.00126164
chr13:99295197-99296038	GPR183	0.0228562	0.0441166
chr13:99296378-99296998	GPR183	0.0353414	0.00954115
chr13:99297299-99297788	GPR183	0.0192514	0.0174865
chr13:99299784-99299975	GPR183	0.0255286	0.000109204
chr13:99303873-99304834	GPR183	0.0477855	0.000317111
chr13:99305752-99306722	GPR183	0.0397957	0.00369736
chr13:99307120-99308061	GPR183	0.0514245	0.0193528
chr13:99321047-99321505	GPR183	0.031004	0.0113194
chr13:99339861-99341298	GPR183	0.0257325	0.00175346
chr14:105459979-105460460	CRIP1	0.00687593	0.0299635
chr14:105473725-105474800	CRIP1	0.049626	0.00761697
chr14:105487530-105487811	CRIP1	0.0443829	0.0105944
chr14:105496848-105501178	CRIP1	0.0527463	0.000111914
chr14:105501594-105501954	CRIP1	0.0221954	0.000162553
chr14:105502641-105503107	CRIP1	0.0281317	2.28088e-07
chr14:105504302-105505413	CRIP1	0.025232	0.000264541
chr14:105507284-105507873	CRIP1	0.0174843	0.000788937
chr15:31292472-31292711	KLF13	0.00837629	0.00908117
chr15:31303109-31304165	KLF13	0.00843267	0.0364024
chr15:31306676-31307314	KLF13	0.0131547	0.000192687
chr15:31308245-31308589	KLF13	0.0126391	0.000402268
chr15:31312365-31313046	KLF13	0.00827578	0.00870532
chr15:31340040-31340930	KLF13	0.0107422	0.0297595
chr15:31341196-31342220	KLF13	0.0128145	0.0293533
chr15:31356004-31356242	KLF13	0.00974399	0.00646985
chr15:31369818-31370092	KLF13	0.00824703	0.0284741
chr15:82809117-82811483	WHAMM	0.0306843	0.00639761
chr15:82817063-82817603	WHAMM	0.0131245	0.0013794
chr15:82818315-82819126	WHAMM	0.00951385	0.0360507
chr15:82820400-82821125	WHAMM	0.013489	0.00210939
chr15:82825505-82826556	WHAMM	0.0137036	0.00165687
chr15:82827683-82829766	WHAMM	0.0213887	0.00481569
chr15:82836256-82837306	WHAMM	0.0106175	0.043306
chr15:82843867-82844055	WHAMM	0.00861266	0.0114681
chr15:92838225-92839265	LINC01578	0.0181204	0.0464367
chr15:92889671-92891359	LINC01578	0.0262517	0.0484036
chr15:92891558-92891806	LINC01578	0.0130059	0.0315109
chr15:92893664-92895227	LINC01578	0.028294	0.0268724
chr15:92910729-92910914	LINC01578	0.024926	0.0104354
chr15:92911687-92912170	LINC01578	0.0252687	0.0125236
chr15:92914503-92915479	LINC01578	0.0514682	0.00695203
chr15:92916031-92916232	LINC01578	0.0182261	0.00684013
chr15:92920894-92921125	LINC01578	0.0182853	0.00528538
chr15:92922354-92923703	LINC01578	0.0265715	0.0140068
chr15:92929017-92929309	LINC01578	0.0101126	0.0267586
chr15:25683727-25684370	ATP10A	0.00862295	0.0138251
chr15:25689114-25689790	ATP10A	0.0111005	0.0010147
chr15:25702874-25704855	ATP10A	0.0130902	0.00959868
chr15:25709488-25711630	ATP10A	0.0160503	0.00628029
chr15:25717540-25719969	ATP10A	0.0126382	0.00903051
chr15:25728781-25730555	ATP10A	0.0136797	0.00602366
chr15:25733143-25734627	ATP10A	0.0101226	0.0188334
chr15:25766941-25768785	ATP10A	0.00964815	0.0424471
chr16:27273640-27274819	IL4R	0.0154981	0.00890748
chr16:27280953-27281908	IL4R	0.020645	0.00285885
chr16:27283228-27283424	IL4R	0.0093364	0.0136702
chr16:27289051-27290319	IL4R	0.0212788	0.000290212
chr16:27313459-27314669	IL4R	0.0201291	0.00553416
chr16:27315114-27315823	IL4R	0.0156212	0.0075464
chr16:27318047-27319124	IL4R	0.0246391	0.0182421
chr16:27332181-27332432	IL4R	0.0121576	0.00539279
chr16:27336400-27337923	IL4R	0.0111317	0.0307927
chr16:27344606-27345442	IL4R	0.00886119	0.0268107
chr16:27353943-27356291	IL4R	0.0137191	0.0263543
chr16:27382225-27382692	IL21R	0.012579	0.0093016
chr16:27401775-27403065	IL21R	0.0270824	6.9542e-08
chr16:27417200-27417810	IL21R	0.0063169	0.0469806
chr16:27418260-27418578	IL21R	0.00700304	0.0173389
chr16:27419039-27419664	IL21R	0.00731612	0.0214047
chr16:27420085-27420348	IL21R	0.00744203	0.00812782
chr16:27424768-27425308	IL21R	0.0108869	0.000318373
chr16:27426175-27427355	IL21R	0.0124147	0.0097365
chr16:27430688-27433459	IL21R	0.0139282	0.00496106
chr16:27438591-27439861	IL21R	0.00909739	0.015934
chr16:27440559-27441516	IL21R	0.0106008	0.00948253
chr16:27449491-27450339	IL21R	0.0143462	0.00614299
chr16:29712812-29713094	C16orf54	0.0105391	0.0323695
chr16:29730769-29732038	C16orf54	0.0144219	0.0114541
chr16:29732282-29732757	C16orf54	0.0180163	0.00349341
chr16:29743786-29744290	C16orf54	0.0313394	0.000814508
chr16:29744708-29744903	C16orf54	0.0145334	0.0357905
chr16:29745203-29746526	C16orf54	0.0298006	0.029207
chr16:29763484-29764444	C16orf54	0.0351171	3.62238e-05
chr16:29772012-29772438	C16orf54	0.0146485	0.0012988
chr17:46145764-46146972	KANSL1-AS1	0.0214485	7.5424e-05
chr17:46153762-46154948	KANSL1-AS1	0.0140932	0.00387758
chr17:46156672-46157174	KANSL1-AS1	0.0210142	5.0575e-07
chr17:46158407-46159770	KANSL1-AS1	0.0192814	1.43655e-05
chr17:46161396-46161740	KANSL1-AS1	0.00728672	0.0462424
chr17:46162861-46165080	KANSL1-AS1	0.0123115	0.0168679
chr17:46166016-46166595	KANSL1-AS1	0.0068464	0.042129
chr17:46168275-46168491	KANSL1-AS1	0.00719426	0.043428
chr17:46171879-46172355	KANSL1-AS1	0.014779	0.000153729
chr17:46172730-46174328	KANSL1-AS1	0.0108688	0.011424
chr17:46175185-46175500	KANSL1-AS1	0.00851128	0.0265437
chr17:46179057-46180006	KANSL1-AS1	0.0116334	0.0110405
chr17:46182830-46183339	KANSL1-AS1	0.0163451	0.00112829
chr17:46186670-46187387	KANSL1-AS1	0.0201362	9.65458e-05
chr17:46192477-46195182	KANSL1-AS1	0.058547	1.22125e-15
chr17:46201759-46202287	KANSL1-AS1	0.00923598	0.0104517
chr17:46212652-46213553	KANSL1-AS1	0.0222687	2.2327e-06
chr17:46224766-46225719	KANSL1-AS1	0.0542455	0
chr17:40531266-40531459	CCR7	0.0129219	0.0121215
chr17:40542610-40543036	CCR7	0.0134291	0.0483431
chr17:40549495-40550251	CCR7	0.0131416	0.0430671
chr17:40560163-40561161	CCR7	0.0226147	0.0241856
chr17:40561838-40562396	CCR7	0.0244742	0.00922937
chr17:40563587-40564626	CCR7	0.0311825	0.000516475
chr17:40565033-40566214	CCR7	0.0310321	0.00151489
chr17:40576097-40576892	CCR7	0.0129484	0.0217718
chr17:40577607-40578054	CCR7	0.0205023	0.000986686
chr17:40582054-40582878	CCR7	0.0230057	0.0222835
chr17:40586262-40586610	CCR7	0.0147982	0.0313294
chr17:40598658-40599507	CCR7	0.0247414	0.0212993
chr17:40602580-40603392	CCR7	0.0230342	0.00326289
chr17:40605339-40605738	CCR7	0.0256634	0.00316989
chr17:48501072-48501414	HOXB2	0.00797525	0.00439206
chr17:48510997-48511685	HOXB2	0.00925557	0.00200391
chr17:48528357-48529156	HOXB2	0.00584833	0.0372669
chr17:48541384-48542594	HOXB2	0.0083194	0.0188099
chr17:48543064-48544845	HOXB2	0.0172556	2.11366e-05
chr17:48548145-48548870	HOXB2	0.00726958	0.0356565
chr17:48585112-48586618	HOXB2	0.0139025	0.000407503
chr17:48592453-48594319	HOXB2	0.0113699	0.00256698
chr17:82056933-82060332	DUS1L	0.0143046	0.00495964
chr17:82076952-82078599	DUS1L	0.0147698	0.00224017
chr17:82079111-82079851	DUS1L	0.0138889	0.000439385
chr17:82080126-82081548	DUS1L	0.0140616	0.00187676
chr17:82082277-82083242	DUS1L	0.0122574	0.00445092
chr17:82083637-82086662	DUS1L	0.0127079	0.0267684
chr17:82088030-82088220	DUS1L	0.0109079	0.00327033
chr17:82088566-82091693	DUS1L	0.0146334	0.0071273
chr18:32059950-32060675	RNF138	0.0106828	0.0159337
chr18:32073434-32074814	RNF138	0.017001	0.000117748
chr18:32075187-32075739	RNF138	0.0148448	0.000423006
chr18:32076066-32076712	RNF138	0.0145827	0.000797668
chr18:32105184-32106290	RNF138	0.010779	0.00730967
chr18:32133410-32134147	RNF138	0.0118184	0.0131158
chr18:32134472-32134860	RNF138	0.00992239	0.00699643
chr18:32136287-32137224	RNF138	0.0105056	0.040176
chr18:32138352-32139125	RNF138	0.0114436	0.0362232
chr18:48915791-48916251	SMAD7	0.0507301	2.77556e-15
chr18:48917085-48917934	SMAD7	0.070167	2.21267e-13
chr18:48918579-48919618	SMAD7	0.0700252	1.0526e-12
chr18:48922482-48923582	SMAD7	0.0414687	0.000169512
chr18:48924342-48924641	SMAD7	0.0241376	0.0462467
chr18:48928626-48929446	SMAD7	0.065303	0.00127874
chr18:48932093-48932648	SMAD7	0.0392933	0.000154387
chr18:48934801-48935482	SMAD7	0.0372976	0.00209375
chr18:48948323-48950495	SMAD7	0.0819364	6.34847e-06
chr18:48951177-48953316	SMAD7	0.07271	2.75046e-05
chr18:48962583-48962816	SMAD7	0.0106862	0.0121386
chr18:48967985-48968198	SMAD7	0.00914813	0.0274018
chr18:48979111-48979461	SMAD7	0.0217132	0.00238499
chr18:48979984-48980346	SMAD7	0.0286147	0.00103447
chr18:48982023-48982652	SMAD7	0.0437256	0.000194654
chr19:14369657-14370821	ADGRE5	0.0441461	0.00103309
chr19:14375048-14376129	ADGRE5	0.0277583	0.0416373
chr19:14380530-14382762	ADGRE5	0.0392326	0.00281783
chr19:14388102-14388365	ADGRE5	0.0135548	0.0114929
chr19:14389536-14389858	ADGRE5	0.0134722	0.0272371
chr19:14393008-14396788	ADGRE5	0.0499551	1.32591e-06
chr19:14398111-14398648	ADGRE5	0.020388	0.000780581
chr19:14409875-14410629	ADGRE5	0.0268006	0.00831597
chr19:14412514-14413335	ADGRE5	0.0189121	0.0216809
chr19:14417987-14418596	ADGRE5	0.0338686	0.00983697
chr19:16324210-16325477	KLF2	0.0488357	0.0473578
chr19:16325865-16327152	KLF2	0.0927173	0.00491317
chr19:16329097-16329489	KLF2	0.0788344	0.0258346
chr19:16330207-16331319	KLF2	0.0876838	0.00329998
chr19:16331911-16332180	KLF2	0.0384996	0.0476469
chr19:16338144-16339434	KLF2	0.0608233	0.013664
chr19:16366311-16366954	KLF2	0.0673868	0.0452116
chr19:16367345-16367546	KLF2	0.0704775	0.00275688
chr19:43437220-43437562	LYPD3	0.0238821	0.0182506
chr19:43468847-43469651	LYPD3	0.0402047	0.00917535
chr19:43470246-43470716	LYPD3	0.0559997	0.00122322
chr19:43482152-43482467	LYPD3	0.0244337	1.58815e-07
chr19:43488936-43489980	LYPD3	0.0175816	0.00699024
chr19:43490767-43491176	LYPD3	0.0139353	0.0104626
chr19:43491630-43492007	LYPD3	0.0210475	7.40464e-07
chr19:43495343-43495626	LYPD3	0.019609	5.74425e-08
chr19:43497747-43498206	LYPD3	0.0130227	0.0158775
chr20:43876484-43876932	TOX2	0.0150302	0.00211106
chr20:43914320-43916475	TOX2	0.039297	9.50814e-11
chr20:43921382-43921823	TOX2	0.0238263	0.00377084
chr20:43925048-43926896	TOX2	0.0254414	0.0157148
chr20:43932825-43934605	TOX2	0.013922	0.0154817
chr20:43936736-43937349	TOX2	0.0172217	0.00260189
chr20:43938791-43939234	TOX2	0.0214017	0.00269111
chr20:43939443-43939827	TOX2	0.0146367	0.018241
chr20:43942572-43943359	TOX2	0.0206096	0.0112791
chr20:43945089-43945672	TOX2	0.0370035	4.09151e-05
chr20:43959017-43959921	TOX2	0.0476805	1.14936e-05
chr20:43964147-43965083	TOX2	0.0470057	2.27177e-09
chr20:57676874-57677066	PMEPA1	0.00916802	0.00624594
chr20:57693063-57694096	PMEPA1	0.00833119	0.0384621
chr20:57694707-57696120	PMEPA1	0.00873845	0.0277246
chr20:57697119-57697590	PMEPA1	0.0113383	0.00310965
chr20:57699045-57699512	PMEPA1	0.00925448	0.0117515
chr20:57701665-57702345	PMEPA1	0.00850399	0.0314329
chr20:57703187-57703557	PMEPA1	0.00699691	0.0241043
chr20:57704409-57704763	PMEPA1	0.0162685	0.000119951
chr20:57709786-57710876	PMEPA1	0.0232867	2.041e-05
chr21:41375203-41375604	MX1	0.0191506	0.00172825
chr21:41378845-41379396	MX1	0.0135597	0.00988
chr21:41386165-41387039	MX1	0.0120131	0.0349196
chr21:41387856-41388118	MX1	0.0126083	0.00421318
chr21:41390239-41390732	MX1	0.0147669	0.00258756
chr21:41393353-41394328	MX1	0.0293985	4.47081e-07
chr21:41395176-41395586	MX1	0.0221498	4.57713e-06
chr21:41396648-41397144	MX1	0.0210779	5.29065e-06
chr21:41397514-41397759	MX1	0.0132064	0.00092092
chr21:41399437-41400083	MX1	0.0199875	2.79496e-05
chr21:41400499-41401483	MX1	0.0227985	4.64772e-06
chr21:41402162-41402435	MX1	0.00882324	0.0373482
chr21:41402899-41403135	MX1	0.0250638	1.4021e-08
chr21:41403441-41403682	MX1	0.017046	1.3882e-06
chr21:41410592-41412148	MX1	0.0467955	2.47312e-09
chr21:41419765-41421170	MX1	0.0391308	0.000629696
chr21:41425758-41426926	MX1	0.0548981	9.27612e-06
chr21:41433121-41433666	MX1	0.014867	0.00577125
chr21:41435918-41437255	MX1	0.024553	4.05301e-06
chr21:41437537-41438117	MX1	0.0254503	4.30523e-07
chr21:41440853-41442021	MX1	0.0313234	3.39806e-08
chr21:41443753-41444010	MX1	0.0225075	1.16472e-06
chr21:41444401-41445881	MX1	0.0358394	7.61096e-10
chr21:41447397-41447966	MX1	0.0249582	1.15072e-06
chr21:41448694-41448900	MX1	0.0214511	5.99649e-08
chr21:41449350-41450019	MX1	0.0312867	3.65468e-10
chr21:41451579-41452491	MX1	0.0327459	2.1952e-10
chr21:41453139-41453395	MX1	0.0177535	1.82689e-05
chr21:41459130-41461224	MX1	0.0664542	8.37177e-11
chr21:46559156-46560286	S100B	0.0525223	0.000751124
chr21:46561265-46561534	S100B	0.0324601	0.000389131
chr21:46566423-46568509	S100B	0.0188382	0.0226972
chr21:46585591-46585917	S100B	0.0111051	0.00534963
chr21:46588119-46588679	S100B	0.010994	0.0212475
chr21:46594255-46594526	S100B	0.0103857	0.0106252
chr21:46596253-46596534	S100B	0.0123788	0.00446695
chr21:46597832-46598248	S100B	0.00943555	0.0261177
chr21:46604748-46606733	S100B	0.0570848	2.11458e-07
chr21:46626352-46627112	S100B	0.0433182	0.0010092
chr21:46633454-46634051	S100B	0.0211028	0.0445768
chr21:46635134-46636211	S100B	0.0265996	0.00702504
chr21:46636938-46637237	S100B	0.0191256	0.0336735
chr22:45317804-45319401	FAM118A	0.0525961	0.0131457
chr22:45324377-45324809	FAM118A	0.0180408	0.0106054
chr22:45328037-45329106	FAM118A	0.0186434	0.00738467
chr22:45329511-45329916	FAM118A	0.0198055	0.000974901
chr22:45330467-45331156	FAM118A	0.0184954	0.00161137
chr22:45336843-45337587	FAM118A	0.0782811	1.27588e-06
chr22:45341352-45341967	FAM118A	0.0700988	0.000456671
chr22:45348613-45349009	FAM118A	0.0183652	0.000749891
chr22:45351307-45351610	FAM118A	0.0128701	0.0327235
chr22:45352764-45353018	FAM118A	0.0308633	1.45309e-07
chr22:45353565-45354455	FAM118A	0.0488551	5.63e-07
chr22:45357212-45357458	FAM118A	0.0182224	0.000154622
chr22:49925354-49926283	PIM3	0.0440703	0.0220547
chr22:49930884-49931334	PIM3	0.0336965	0.00531475
chr22:49935916-49936831	PIM3	0.0397246	0.0115196
chr22:49951167-49953391	PIM3	0.0622445	2.53183e-10
chr22:49959956-49961119	PIM3	0.0300356	0.0275012
chr22:49961922-49962659	PIM3	0.0661331	2.22173e-06
chr22:49970352-49971561	PIM3	0.0474579	0.0126571
chr22:49975816-49977091	PIM3	0.0327682	0.0172116
chrX:41330226-41330496	DDX3X	0.0168106	0.00372922
chrX:41332835-41335274	DDX3X	0.0604337	1.94602e-10
chrX:41344470-41344778	DDX3X	0.0101164	0.00217729
chrX:41345674-41346016	DDX3X	0.0078264	0.0204181
chrX:41347317-41348026	DDX3X	0.0138184	0.0011344
chrX:41349794-41353343	DDX3X	0.0270812	0.00303409
chrX:41353644-41354371	DDX3X	0.00881883	0.0147195
chrX:41361372-41363391	DDX3X	0.015566	1.31239e-05
chrX:41364182-41364704	DDX3X	0.00677631	0.0391601
chrX:1420260-1421526	P2RY8	0.00870238	0.0201723
chrX:1423637-1423835	P2RY8	0.00870657	0.0162742
chrX:1435320-1436010	P2RY8	0.00827083	0.0275438
chrX:1462633-1463466	P2RY8	0.0305415	0.00018377
chrX:1471701-1472404	P2RY8	0.0346195	2.71935e-08
chrX:1481426-1482576	P2RY8	0.022165	0.00871118
chrX:1500694-1501523	P2RY8	0.0133227	0.00407288
chrX:1504244-1505741	P2RY8	0.0115084	0.0045135
chrX:1507402-1508467	P2RY8	0.0109414	0.00908538
chrX:1510288-1512693	P2RY8	0.00811761	0.0387232
chrX:1513221-1514297	P2RY8	0.0112459	0.00929638
chrX:149483711-149484689	IDS	0.0157554	0.000351703
chrX:149484997-149485442	IDS	0.0131886	0.00147788
chrX:149486093-149486920	IDS	0.018508	0.000629535
chrX:149487201-149488200	IDS	0.0174729	0.00105809
chrX:149488409-149489041	IDS	0.0143129	0.00241565
chrX:149491282-149491903	IDS	0.0130164	0.00274638
chrX:149492551-149496875	IDS	0.0278744	0.00229651
chrX:149497311-149498071	IDS	0.0116625	0.0189575
chrX:149510474-149510720	IDS	0.0133043	0.00226079
chrX:149521412-149521788	IDS	0.0161136	0.0317597

[truncated: 2 more sheets: Naive B, TrB]
