# Supplementary material for: Infants display reduced NK cell responses in RSV and increased inflammatory responses in SARS-CoV-2 infections
Source: Research Square preprint supplement (doi:10.21203/rs.3.rs-5640872/v1), 2025-01-13
Supplement: Supplementary file 5 [file 94b6543014427109a17ac6f9.xlsx]

## Sheet: Index
Sheet Name	Description
COVID-19 Patients	Clinical data for infants infected with SARS-CoV-2
RSV Patients	Clinical data for infants infected with RSV
Controls	Clinical data for healthy controls

## Sheet: COVID-19 Patients
Sample ID	Disease Severity	Group	Year	Month	Age (months)	GA (weeks)	Sex	Race/Ethnicity	Delivery mode	Vaccines	Underlying conditions	Fever	Days Sx	Tx (steroids/antivirals/inotropic)	Oxygen	Resp manifestations	Other sx	Days Dx (contact)-sample	Admission Unit	Duration of hospitalization (days)	VL (ct) NP	WBC	Nt%	Lymph %	Monos %
pCoV2	Severe	COVID G3	2020	May	1	38	F	Black	Vaginal	UTD	Trisomy 21/CHD	No	1	None	Yes/HFNC	Resp distress		7	PICU	2.24	15.26	9.8	38.3	19.6	15
pCoV3	Moderate	COVID G2	2020	June	7.5	40	M	Asian	Vaginal	UTD	8% Burn	No	3	None	No	No	Universal screening	7	Ward	1.9	25.24	ND	ND	ND	ND
pCoV4	Subacute	COVID G1	2020	June	2.53	35	F	Hispanic	Vaginal	UTD	Premature/laryngomalacia/congenital abnormalities	Yes	8	None	No	URI		17	Ward	1.9	35.81	7.5	30.6	59.3	7.9
pCoV5	Moderate	COVID G2	2020	June	0.5	37	M	Black	Vaginal	UTD	None	No	2	None	No	No	Poor PO intake	6	Ward	3.5	21.48	7.8	44.4	33	17.9
pCoV6	Moderate	COVID G2	2020	May	4.2	36	F	Hispanic	Vaginal	Not UTD	None	Yes	2	None	No	URI		14	Ward	3.6	18.2	9.7	2	61	12.7
pCoV7	Severe	COVID G3	2020	May	6.4	37	F	White	Vaginal	Not UTD	None	Yes	5	None	No	LRTI		7	Ward	2.1	18.55	5.5	10	76	14
pCoV8	Moderate	COVID G2	2020	June	1.2	39	M	Asian	Vaginal	UTD	None	Yes	1	None	No	URI		7	Ward	2.4	17.61	7.3	11.8	80	7.3
pCoV9	Moderate	COVID G2	2020	June	8.5	37	F	Black	C-section	UTD	None	Yes	2	None	No	URI		6	Ward	1.6	21.87	5.9	20.7	67	12.3
pCoV10	Subacute	COVID G1	2020	May	6.63	39	F	Asian	C-section	UTD	None	Yes	FU	None	No	URI		35	Ward	1.6	35.81	10.6	38.3	61.6	51
pCoV11	Severe	COVID G3	2020	September	0.1	39	F	White	C-section	UTD	None	Yes	1	None	Yes	Resp distress		1	PICU	21.1	15.25	7.2	73	20	7
pCoV12	Moderate	COVID G2	2020	May	1.37	40	M	Hispanic	Vaginal	UTD	None	Yes	1	None	No	URI		UK	Ward	1.8	17.86	8.3	10.8	81.4	5.9
pCoV13	Subacute	COVID G1	2020	May	19.2	40	M	Biracial	Vaginal	UTD	None/head trauma	No	Asx	None	No	No	Universal screening	UK	Ward	0.9	36.45	5.3	26.8	59.4	10.2
pCoV14	Subacute	COVID G1	2020	September	27.5	40	F	Black	Vaginal	UTD	None	No	4	None	No	No	Universal screening	28	Ward	1	36.84	5.3	43.2	47.5	8.7
pCoV15	Subacute	COVID G1	2020	October	0.6	32	M	White	Vaginal	UTD	Prematurity	No	11	None	Yes-CPAP	Resp distress		19	PICU	81	32	NA	NA	NA	NA
pCoV16	Subacute	COVID G1	2020	December	7.86	40	M	Black	Vaginal	UTD	None	Yes	1	None	Yes-MV	Apnea; RV+	BRUE	21	PICU	4.75	37.62	11.9	71.3	18.5	9.8
pCoV17	Severe T	COVID G3_S	2020	November	0.13	39	M	Black	C-section	UTD	None	No	4	Dexamethasone/Remdesivir	Yes-MV	Resp failure		6	PICU	11	26.65	3.3	56.5	35.2	7.4
pCoV18	Subacute	COVID G1	2021	January	11.8	38	F	White	Vaginal	UTD	CHD/FTT	No	No	None	NO	No	Universal screening	UK	Ward	3	33.55	ND	ND	ND	ND
pCoV19	Subacute	COVID G1	2020	December	1	36	M	White	Vaginal	UTD	None	Yes	12	None	NO	No		30	Ward	1.8	37.63	9.2	18	72	8
pCoV20	Moderate	COVID G2	2020	December	0.86	38	M	Biracial	Vaginal	UTD	None	Yes	2	None	NO	No		UK	Ward	2.1	21.26	13.2	39.3	36.4	22.4
pCoV21	Severe T	COVID G3_S	2021	January	0.96	40	M	White	Vaginal	UTD	None	No	5	Dexamethasone/Remdesivir/IVIG	Yes-MV	No	Cardiac: SVT/WPW	UK	PICU	17.8	23.65	2.3	39.6	52.3	7.2
pCoV22	Moderate	COVID G2	2020	November	2	40	M	Black	C-section	UTD	Perinatal HIV exp on AZT	Yes	2	None	NO	No		8	Ward	1.9	18.98	8.7	14.2	66	17.6
pCoV23	Moderate	COVID G2	2020	November	1.9	39	M	Asian	C-section	UTD	None	Yes	2	None	NO	URI		5	Ward	0.9	23.88	9	38.3	46.8	11.8
pCoV24	Moderate	COVID G2	2020	November	0.76	38	F	Black	Vaginal	UTD	None	Yes	2	None	NO	No		2	Ward	1.1	19.5	10.1	20	48	17
pCoV25	Subacute	COVID G1	2021	January	1.3	41	F	Hispanic	Vaginal	UTD	None	Yes	4	None	NO	No		5	Ward	1.2	35.39	9.1	61.7	24.5	13
pCoV26	Moderate	COVID G2	2020	October	0.96	39	F	Black	Vaginal	UTD	None	Yes	1	None	NO	No		8	Ward	1.5	13.24	4.1	33	42	25
pCoV27	Severe T	COVID G3_S	2020	December	14	26	M	White	C-Section	UTD	Yes (CLD, prematurity)	Yes	2	Dexa, remdesivir	Yes	Resp failure		4	PICU	43	14.5	20.4	84.3	0.9	14.8
pCoV28	Moderate	COVID G2	2021	October	7.4	40	F	White	Vaginal	UTD	No	No	2	None	No	No	GI	Unknown	Ward	1.7	16.6	N/A	N/A	N/A	N/A
pCoV29	Severe	COVID G3	2022	January	1.4	35	F	Black	Vaginal	UTD	Yes (Prematurity, 35 wk	Yes	7	Only remdesivir- No dexa	Yes	Resp failure		8	PICU	6.9	21.6	7.8	49	33	14
pCoV30	Severe	COVID G3	2022	January	3.1	36	M	White	Vaginal	UTD	Yes (36 weeks)	Yes	4	Only remdesivir- No dexa	Yes	Resp distress		7	PICU	2.8	16.1	6.5	35.7	52.8	11
pCoV31	Severe T	COVID G3_S	2020	December	13	40	M	White	C-Section	UTD	YES, reactive airway disease; eczema	Yes	1	Dexa, remdesivir	Yes	Resp failure		7	PICU	5.6	14.8	12.7	85.9	9	5

## Sheet: RSV Patients
Sample ID	Disease Severity	Group	Year	Month	Age (months)	GA (weeks)	Sex	Race/Ethnicity	Delivery mode	Vaccines	Underlying conditions	Fever	Days Sx	Steroids	Steroids before sample	Oxygen	Admission Unit	Duration of hospitalization (days)	Clinical Disease Severity Score (CDSS)	WBC	Segs% (Neutrophils+bands)	Lymphs%	Monos%
pRSV1	Severe	RSV G3	2019	November	1.47	39	F	Biracial	C-Section	UTD	None	No	4	No	None	Yes	PICU	15.8	13	8.5	56	25	12
pRSV2	Severe	RSV G3	2019	December	1	40	M	White	Vaginal	UTD	None	No	6	No	None	Yes	PICU	19.3	13	2.4	41	40	17
pRSV3	Moderate	RSV G2	2020	Jan	12.8	39	M	White	C-Section	UTD	None	Yes	6	No	None	Yes	Ward	3	8	12	34.1	53.4	11.6
pRSV4	Moderate	RSV G2	2019	November	2.4	40	F	White	Vaginal	Not UTD	None	Yes	4	No	None	Yes	Ward	1.2	5	14.8	49	34	16
pRSV5	Moderate	RSV G2	2020	Jan	0.8	37	M	White	Vaginal	UTD	None	No	5	No	None	Yes	Ward	2.6	6	7	9.8	72.5	15.7
pRSV6	Moderate	RSV G2	2019	November	2.8	35	F	Biracial	Vaginal	UTD	Prematurity	No	5	No	None	Yes	Ward	2.8	7	N/A	N/A	N/A	N/A
pRSV7	Mild	RSV G1	2019	April	13.7	39	F	White	Vaginal	UTD	None	Yes	5	No	None	No	Ward	1.5	3	N/A	N/A	N/A	N/A
pRSV8	Mild	RSV G1	2019	March	5.37	37	M	Black	Vaginal	Not UTD	None	No	5	No	None	No	Ward	0.85	4	8.8	23	65	11
pRSV9	Mild	RSV G1	2019	Feb	1.8	40	M	White	Vaginal	UTD	None	No	4	No	None	No	Ward	1.3	3	8	7.6	83	7.6
pRSV10	Moderate	RSV G2	2019	November	1.4	39	M	White	Vaginal	UTD	None	No	7	No	None	Yes	Ward	3.4	8	N/A	N/A	N/A	N/A
pRSV11	Moderate	RSV G2	2019	December	10.5	38	F	White	Vaginal	UTD	None	Yes	4	No	None	Yes	Ward	3.6	8	8.1	38	50.9	11.1
pRSV12	Mild	RSV G1	2020	Jan	1.1	39	M	White	Vaginal	UTD	None	No	6	No	None	No	Ward	0.92	2	10.2	5.3	78.9	13.7
pRSV13	Mild	RSV G1	2020	Jan	4.3	39	F	White	C-Section	Not UTD	None	No	5	No	None	No	Ward	0.6	4	9.5	9.7	79.6	9.7
pRSV14	Severe	RSV G3	2021	July	1.6	37	M	Multiracial	C-section	UTD	None	No	5	No	None	Yes	PICU	3.1	12	N/A	N/A	N/A	N/A
pRSV15	Severe	RSV G3	2021	August	4.2	39	F	White	Vaginal	UTD	None	No	6	No	None	Yes	PICU	2.8	12	N/A	N/A	N/A	N/A
pRSV16	Severe	RSV G3	2021	August	3.8	40	M	White	Vaginal	UTD	None	Yes	4	No	None	Yes	PICU	5.3	12	7.9	37	46	11
pRSV17	Severe	RSV G3	2021	August	2.8	39	M	White	Vaginal	Not UTD	None	No	7	No	None	Yes	PICU	4.3	8	7.4	34.3	53.6	11.4
pRSV18	Moderate	RSV G2	2021	September	6.2	37	M	White	Vaginal	UTD	None	Yes	5	No	None	Yes	Ward	2.75	7	N/A	N/A	N/A	N/A
pRSV19	Severe	RSV G3	2021	September	4.6	37	F	Black	C-section	UTD	None	Yes	2	No	None	Yes	PICU	4.3	9	N/A	N/A	N/A	N/A

## Sheet: Controls
Sample ID	Disease Severity	Group	Year	Month	Age (months)	GA (weeks)	Sex	Race/Ethnicity	Delivery mode	Vaccines	Underlying conditions	WBC	Nt%	Lymph %	Monos %
pHC1	Healthy	Healthy	2018	October	2.17	39	F	W	Vaginal	UTD	None	NA	NA	NA	NA
pHC2	Healthy	Healthy	2018	November	1.87	40	F	W	Vaginal	UTD	None	NA	NA	NA	NA
pHC3	Healthy	Healthy	2019	October	12.07	38	F	W	Vaginal	UTD	None	6.7	20.4	73.5	6.1
pHC4	Healthy	Healthy	2018	October	8.53	37	F	B	Vaginal	UTD	None	15.2	14.7	79	2.1
pHC5	Healthy	Healthy	2019	January	1.93	40	M	Biracial	Vaginal	UTD	None	12	12.1	77.8	9.1
pHC6	Healthy	Healthy	2019	May	1.83	37	F	B	C-section	UTD	None	NA	NA	NA	NA
pHC7	Healthy	Healthy	2019	July	2.13	37	F	B	Vaginal	UTD	None	7.2	10.9	76.2	10.9
pHC8	Healthy	Healthy	2019	March	1.92	39	F	W	C-section	UTD	None	NA	NA	NA	NA
pHC9	Healthy	Healthy	2018	November	2.9	38	M	B	C-section	UTD	None	5	6.7	78.9	7.7
pHC10	Healthy	Healthy	2019	June	8.43	39	M	B	Vaginal	UTD	None	5.5	19.6	74.5	3.9
pHC11	Healthy	Healthy	2019	July	1.53	37	F	W	Vaginal	UTD	None	8.8	18.2	72.8	6.9
pHC12	Healthy	Healthy	2019	July	1.6	38	M	B	Vaginal	UTD	None	7.3	8.6	84.7	4.8
pHC13	Healthy	Healthy	2019	March	1.9	39	F	Biracial	Vaginal	UTD	None	9.4	20.1	65.6	10
pHC14	Healthy	Healthy	2018	November	2.1	38	F	B	C-section	UTD	None	9.6	28.6	55	14.7
pHC15	Healthy	Healthy	2019	February	10.5	37	M	Black	Vaginal	UTD	Atopy	NA/	NA/	NA/	NA/
pHC16	Healthy	Healthy	2019	February	6.6	38	M	White	C-section	UTD	None	17.4	19.5	72.2	5.9
pHC17	Healthy	Healthy	2019	October	6.3	38	F	White	Vaginal	UTD	None	10.8	17	71	8
