# Supplementary material for: Infants display reduced NK cell responses in RSV and increased inflammatory responses in SARS-CoV-2 infections
Source: Research Square preprint supplement (doi:10.21203/rs.3.rs-5640872/v1), 2025-01-13
Supplement: Supplementary file 6 [file 96596b29b5b53ce15615e048.xlsx]

## Sheet: Index
Sheet Name	Description
ISG Score	List of genes used for scoring type I ISG scores. Source: 'M8.3:Type 1 Interferon', Altman et al., Nature Communications (2021)
NFKB Pathway Score	List of genes used for scoring NFKB pathway scores. Source: Biocarta NFKB Pathway, https://www.gsea-msigdb.org/gsea/msigdb/human/geneset/BIOCARTA_NFKB_PATHWAY.html
NFKB/REL Score	Transcription factor accessibility from chromVAR used for NFKB/REL scores
CD14+ Monocyte Epigenetic ISG Score	List of peaks used for calculating epigenetic ISG scores in CD14+ monocytes
CD16+ Monocyte Epigenetic ISG Score	List of peaks used for calculating epigenetic ISG scores in CD16+ monocytes

## Sheet: ISG Score
Gene
EPSTI1
HERC5
HES4
IFI44
IFI44L
IFI6
IFIT1
IFIT3
ISG15
LY6E
MX1
OAS1
OAS2
OAS3
OASL
RSAD2
XAF1

## Sheet: NFKB Pathway Score
Gene
CHUK
FADD
IKBKB
IKBKG
IL1A
IL1R1
MAP3K1
MAP3K14
MAP3K7
MYD88
NFKB1
NFKBIA
RELA
RIPK1
TAB1
TNF
TNFAIP3
TNFRSF1A
TNFRSF1B
TRADD
TRAF6

## Sheet: NFKB REL Score
Transcription Factor
MA0105.4_NFKB1
MA0778.1_NFKB2
MA0101.1_REL
MA0107.1_RELA

## Sheet: CD14+ M. Epigenetic ISG Score
chr	start	end
chr11	355183	356450
chr1	997155	997405
chr11	67989759	67991369
chr1	999684	1001166
chr12	121038612	121039611
chr1	78619466	78620961
chr21	41423369	41424108
chr1	993375	994201
chr2	26492885	26494250
chr1	991143	991579
chr14	94110589	94111203
chr1	78649527	78649950
chr12	121059710	121061020
chr2	6880303	6880662
chr10	89309931	89310728
chr8	143025716	143026800
chr7	139945870	139947181
chr11	313495	314928
chr1	999162	999408
chr2	26477073	26478374
chr2	26503127	26504039
chr2	26499660	26499878
chr21	41410730	41412130
chr7	139104189	139105263
chr2	37154955	37155201
chr11	326336	327616
chr11	350407	351299
chr21	41458961	41461190
chr2	26486750	26487828
chr2	26469205	26470014
chr1	78622585	78623147
chr17	80284588	80285948
chr21	41425758	41427175
chr12	121036792	121037005
chr1	78617432	78617997
chr17	6755580	6757365
chr11	355183	356450
chr2	26499660	26499878
chr21	41410730	41412130
chr17	80284588	80285948
chr2	26492885	26494250
chr21	41458961	41461190
chr21	41423369	41424108
chr11	348263	348777
chr2	26477073	26478374
chr1	78648318	78648627
chr2	26486750	26487828
chr12	121036792	121037005
chr1	999684	1001166
chr2	37154955	37155201
chr1	78622585	78623147
chr2	190953646	190954929
chr11	67989759	67991369
chr1	78619466	78620961
chr2	6880303	6880662
chr2	190956787	190957713
chr7	140083648	140084614
chr21	41425758	41427175
chr13	42970711	42971721
chr14	94110589	94111203
chr11	313495	314928
chr2	190984583	190986800
chr12	121038612	121039611
chr2	6877318	6878330
chr2	6877318	6878330

## Sheet: CD16+ M. Epigenetic ISG Score
chr	start	end
chr2	26503148	26503971
chr2	26492729	26494256
chr12	121038614	121039635
chr2	26477215	26478341
chr21	41410825	41412104
chr11	355183	356450
chr15	88638328	88639363
chr21	41425758	41426576
chr21	41459505	41461177
chr17	42107450	42108285
chr1	999628	1001132
chr1	78619541	78620980
chr11	57587773	57588675
chr21	41410825	41412104
chr2	26503148	26503971
chr2	26477215	26478341
chr11	355183	356450
chr8	143024004	143024679
