# Supplementary material for: Infants display reduced NK cell responses in RSV and increased inflammatory responses in SARS-CoV-2 infections
Source: Research Square preprint supplement (doi:10.21203/rs.3.rs-5640872/v1), 2025-01-13
Supplement: Supplementary file 7 [file b5b364d4bc5f6ed0e735bc2f.xlsx]

## Sheet: Index
Sheet Name	Description
Cytokine Data	Bridge Normalized cytokine data (B2 values adjusted to B1)
Clinical Group Legend	Legend of clinical group labels used in this table
LOD	Limit of detection values for cytokines within batches
PCA	PC coefficients for each cytokine
Group Comparison	Pairwise group comparisons between Healthy, COVID-19 (Moderate+Severe), and RSV (Mild+Moderate+Severe)

## Sheet: Cytokine Data
Sample ID	Clinical Group	Age (Months)	Sex	Race/Ethnicity	Batch	CXCL8	VEGFA	CD8A	CCL7	GDNF	CDCP1	CD244	IL7	TNFRSF11B	TGFB1	PLAU	IL6	IL17C	CCL2	IL17A	CXCL11	AXIN1	TNFSF10	IL20RA	CXCL9	CST5	IL2RB	IL1A	OSM	IL2	CXCL1	TSLP	CCL4	CD6	KITLG	IL18	SLAMF1	TGFA	CCL13	CCL11	TNFSF14	FGF23	IL10RA	FGF5	MMP1	LIFR	FGF21	CCL19	IL15RA
pCoV10	COVID G1	6.63	F	Asian	B1	6.71284	12.5262	9.96057	2.98983	2.7599	3.71354	7.24238	3.80188	10.4928	8.1063	10.8151	4.79712	5.57468	12.2655	2.81097	7.85521	6.19921	9.26256	1.4564	6.14689	8.67416	1.7661	-0.57302	5.76393	1.72423	10.8937	2.03636	8.0397	8.44762	9.52771	9.4542	2.74409	5.24274	14.9207	7.48682	6.45711	4.15267	1.41244	1.54736	16.2534	4.8196	7.83844	11.7481	2.95736
pCoV11	COVID G3	0.1	F	White	B1	11.3365	12.3878	10.5873	7.41605	2.98199	4.67887	6.49862	2.98277	10.0276	6.87926	10.5502	7.27121	8.6696	14.4547	2.66161	12.15	3.99321	10.1584	1.95265	7.79392	8.08836	1.5139	-0.49156	7.95332	2.16652	12.1938	2.95175	7.69987	6.59965	8.64981	9.67296	2.16456	4.87122	14.2023	7.78991	5.97799	3.83042	2.80256	1.53232	14.2917	5.50952	4.00193	12.4258	3.88559
pCoV12	COVID G2	1.37	M	Hispanic	B1	8.55268	12.5233	11.098	3.35092	2.67513	4.00058	6.93542	3.78601	10.3549	7.99925	11.0315	4.89367	6.92093	13.5298	3.97108	8.63926	3.64347	9.68674	1.65446	6.60138	9.192	1.48729	-0.61914	5.13797	1.57377	11.4249	1.83322	8.84988	8.01535	9.39924	9.46803	2.86486	4.07762	15.4169	8.13594	5.74517	3.62216	1.60572	1.51818	14.9595	5.76636	3.73788	11.9935	3.00763
pCoV13	COVID G1	19.2	M	Biracial	B1	7.13675	12.7135	10.5031	2.97725	2.37429	3.31551	7.04518	3.60237	10.2762	7.70985	10.1911	2.09673	5.87704	12.684	5.02476	7.24602	4.31296	8.7202	2.07153	6.55679	6.97366	1.84846	-0.71806	5.18079	1.50751	10.5413	2.79593	6.11899	8.18096	9.6129	9.08177	3.19973	3.83358	13.9499	7.86244	5.49573	2.3374	1.76641	1.33134	12.8544	4.5607	5.91981	9.96614	2.38913
pCoV14	COVID G1	27.5	F	Black	B1	6.3023	11.1072	10.1929	2.51121	2.2533	2.70502	6.14731	2.83114	9.935	7.62155	9.25129	2.9445	4.0223	10.3352	3.0805	8.38218	3.08969	8.40904	2.29311	6.72771	6.54262	1.41511	-1.42971	4.6024	1.03389	11.3946	1.7562	7.43527	7.2315	9.184	8.71242	2.39147	4.09884	14.5819	7.61618	5.16132	1.61148	1.56088	1.18271	14.9798	4.69916	4.9656	9.9987	1.38451
pCoV15	COVID G1	0.6	M	White	B1	7.41145	13.4103	10.1472	2.87431	3.14166	3.49604	6.42616	3.18531	10.1402	8.68269	10.474	3.66403	6.42289	13.277	2.92443	7.98816	6.61109	9.03887	1.87212	6.22911	9.15633	0.8699	-0.7052	5.55115	1.77703	11.1762	2.11451	8.44651	7.48845	9.81485	8.8789	2.67293	5.01411	13.7135	7.87235	6.70673	4.73246	1.56552	1.76487	15.8943	4.987	6.39619	11.0593	2.80594
pCoV16	COVID G1	7.86	M	Black	B2	7.11292	12.2664	10.8018	3.69579	2.82611	3.65132	7.17471	3.68169	11.1851	7.90075	10.2004	7.90062	5.6551	12.1583	4.67784	7.80706	5.04259	8.56638	1.59884	7.01186	6.57355	1.19887	-0.83826	8.50076	1.5281	11.2482	2.51364	7.69754	8.64141	9.80428	10.0169	3.01359	6.72121	14.6417	6.86851	7.88108	3.02295	1.56469	1.28876	14.2267	4.94796	8.66821	10.5937	2.20336
pCoV18	COVID G1	11.8	F	White	B2	8.24408	12.3088	10.9769	3.98963	3.05821	3.94579	7.28751	3.8707	10.5448	8.1815	10.7179	2.94964	6.32116	13.7523	7.30258	9.0954	5.50034	9.42431	1.64532	7.72762	7.15029	1.85118	-0.79932	7.48018	1.63134	11.9369	3.03439	7.25131	7.47696	9.97015	9.97223	2.80512	6.45172	15.6065	9.20931	6.90707	3.59474	2.73677	1.58069	15.318	4.98878	6.05718	11.6319	2.75074
pCoV2	COVID G3	1	F	Black	B1	8.24733	12.3065	9.11737	3.64463	2.90118	3.55257	6.82102	4.04519	10.2368	8.14568	10.124	5.91577	7.15039	13.455	5.20868	8.08089	5.29399	9.64186	1.50593	6.93442	8.06072	1.1807	-0.72032	6.42837	1.94604	12.9652	1.70734	7.17427	5.66674	8.72304	10.5703	2.33156	4.97647	14.9811	8.73074	6.87505	3.80536	1.32897	1.51586	16.1849	5.25701	5.53003	10.8662	2.77727
pCoV20	COVID G2	0.86	M	Biracial	B2	9.08431	12.4298	11.16	3.79503	3.4541	4.37816	7.54472	4.01148	10.3448	8.2395	10.8139	5.67863	6.96898	13.623	5.81461	9.96463	6.59479	9.80719	2.06272	7.90426	9.12354	1.8389	-0.54408	7.88402	1.80361	11.7713	2.56836	8.42296	8.41557	9.51136	8.96581	2.77058	4.6204	15.4312	8.9264	6.7605	3.95387	1.79446	1.39665	15.9678	5.95639	3.29558	11.6569	2.66907
pCoV21	COVID G3_S	0.96	M	White	B2	9.26821	12.327	9.91445	3.24912	3.18898	3.35975	5.654	3.86473	10.4995	6.82389	10.0263	3.87233	6.96837	11.7142	3.00448	9.98875	3.27255	9.29448	1.58596	6.05848	7.23671	1.8775	-1.04183	5.30541	1.49611	10.3003	1.97456	5.82998	6.50182	8.06086	8.84339	2.75065	4.4866	11.5733	6.23108	5.24038	2.58584	1.70186	1.25775	14.2976	5.74924	7.28939	9.65872	3.94836
pCoV22	COVID G2	2	M	Black	B1	7.29131	11.497	11.4448	2.35175	3.1005	3.59718	6.1075	2.86877	10.0129	7.06016	10.472	4.3293	4.84339	11.875	3.28208	5.331	4.69027	9.30714	1.86761	5.60887	8.69657	1.30962	-0.99649	4.43442	1.66356	12.207	1.7951	7.86423	6.87576	9.86446	8.82185	2.0058	3.76947	12.413	6.49046	5.89449	3.6599	1.22075	1.52984	13.1544	5.08377	3.99795	11.0501	2.83833
pCoV23	COVID G2	1.9	M	Asian	B1	7.84374	12.1476	11.131	2.92813	3.69496	3.97807	6.9758	3.67633	10.7416	7.4931	10.5447	6.65396	6.72232	13.2784	3.61655	8.78216	4.32757	9.80606	1.54734	6.79972	8.19597	1.45184	-0.62117	5.93634	1.78792	11.3794	1.75998	7.65726	7.92015	10.0191	9.39292	2.51649	4.52638	13.7035	7.10152	6.67618	2.83639	1.99166	1.44761	14.9601	5.62859	3.13201	11.436	2.71544
pCoV24	COVID G2	0.76	F	Black	B1	7.57956	12.0657	10.8884	3.07535	2.78828	3.53536	6.41233	3.54838	10.1596	8.30463	10.9247	4.40607	5.5586	12.5887	3.70203	8.87606	3.95299	9.70727	1.74488	6.44102	9.15593	1.42587	-0.79462	5.15461	1.85526	12.5276	2.09406	7.41392	7.26337	9.46893	9.92115	2.54113	4.65437	14.9672	7.83468	6.34506	3.97023	1.11212	1.67853	14.448	5.18097	5.42038	11.5562	2.75911
pCoV25	COVID G1	1.3	F	Hispanic	B2	7.17951	13.3881	10.4396	3.28415	2.84154	4.22113	7.53861	4.33533	10.3734	8.38258	10.7273	6.54627	5.46285	13.236	4.47717	8.29885	6.27129	9.40795	1.50066	5.99608	10.4958	1.39228	-0.81178	6.61819	1.68928	11.7713	2.58303	8.04598	7.42694	9.46162	9.11782	2.55745	4.83884	13.4851	7.62782	7.43977	3.30894	1.83457	1.60279	15.3874	5.3008	3.28757	11.3893	2.91215
pCoV26	COVID G2	0.96	F	Black	B1	8.23424	12.4763	10.924	2.89397	3.07141	3.89835	6.72613	3.23817	10.265	8.14387	11.016	4.16054	5.98901	12.8997	4.44178	9.0278	4.90126	9.93648	1.90088	7.02185	9.73184	1.78113	-0.50383	4.87034	1.87072	12.2859	1.98161	8.8839	7.00703	10.1028	10.291	2.70855	4.02523	14.3927	7.16747	6.06321	3.34536	1.1974	1.81753	14.6451	5.5892	2.74971	11.4371	2.97143
pCoV27	COVID G3_S	14	M	White	B2	7.34414	11.7197	10.5417	7.47337	2.1448	3.3363	5.98419	4.52456	9.93941	7.89456	9.49639	5.09656	6.83725	13.1865	3.15707	11.6886	5.4739	9.26849	1.74184	6.94574	6.0226	1.81765	-0.77613	7.91317	1.40268	10.749	3.03753	7.13467	6.45096	9.9129	9.22683	2.37647	5.60051	14.2669	8.70148	7.42156	2.94259	1.4343	1.27557	13.1237	5.12653	4.36921	9.45945	2.50789
pCoV3	COVID G2	7.5	M	Asian	B1	9.88808	12.1315	9.69443	4.93532	2.63966	3.203	7.03361	3.88718	10.1168	7.49418	9.87668	5.53038	5.11927	12.0991	3.10965	7.17084	5.86261	9.41756	1.65548	6.36779	6.95232	1.19228	-0.76013	5.16218	1.69054	10.7509	1.77951	7.39826	6.7244	8.8467	11.1838	2.20609	3.34451	12.1273	6.80457	6.46291	3.07393	1.57632	1.40696	14.6636	4.5064	6.6448	10.5647	2.39927
pCoV4	COVID G1	2.53	F	Hispanic	B1	6.87973	11.5846	10.8092	2.78411	3.06131	3.87688	6.85833	3.523	10.8358	7.40548	11.059	6.28694	7.25056	13.246	3.68844	8.34501	4.16992	9.26963	1.64246	5.93842	8.56074	1.5124	-0.96492	5.32918	1.5871	9.94763	2.58417	6.95983	7.44203	9.79173	9.85377	2.76829	4.15948	13.2484	7.17944	6.11393	3.43716	1.88528	1.68886	15.5671	5.32758	3.90038	11.7609	2.82011
pCoV5	COVID G2	0.5	M	Black	B1	7.65261	13.4899	10.7506	2.39149	2.76584	3.45163	7.04425	3.54113	10.2579	8.65227	10.9472	2.69114	5.58814	12.1116	2.76009	8.52956	4.39105	9.66893	1.65693	5.7965	9.84259	1.33464	-0.72094	4.22173	1.55238	12.7684	1.99508	8.1703	7.05753	9.25269	9.20859	2.14519	4.93336	12.7502	6.89182	6.12277	3.34973	1.94902	1.91046	15.8198	5.65017	2.92313	11.6285	2.97697
pCoV7	COVID G3	6.4	F	White	B1	8.68965	12.7926	11.5943	3.25383	2.75243	4.3436	7.19959	3.88541	10.676	7.97519	10.5143	4.98192	5.53619	13.0028	4.16819	8.95175	4.11357	9.73807	1.61119	7.57773	7.20253	1.62776	-0.70706	5.05979	1.41601	12.7545	2.66513	7.91948	8.19529	8.67765	10.3835	2.94277	3.99212	14.1936	8.17338	6.71608	2.81994	4.67803	1.44382	15.6878	5.38749	8.03025	11.0642	3.05048
pCoV8	COVID G2	1.2	M	Asian	B1	7.82309	12.2794	11.2778	2.60238	2.26295	3.08503	6.88761	3.23957	10.4683	7.26893	10.5238	6.30498	6.3435	12.6846	3.2895	7.45092	4.16293	9.27295	1.07226	6.44909	9.34946	1.46888	4.28338	5.89148	1.44995	10.9904	1.63443	7.43631	7.47586	9.9777	8.92963	2.43667	4.96112	11.9772	6.86741	5.64089	4.26192	1.22816	1.43965	15.3066	5.36851	2.64967	11.6306	2.87777
pCoV9	COVID G2	8.5	F	Black	B1	7.11315	11.8949	11.9752	3.11846	2.62385	4.10673	7.11513	3.77898	10.7924	7.53229	10.6686	4.01681	5.73326	11.5127	3.87268	8.35418	3.41204	9.16965	1.59583	7.47233	6.87882	1.48985	-0.84779	5.63182	1.82708	12.1051	2.33776	8.15087	8.75017	9.64498	10.1462	2.80332	4.2961	13.2257	7.12062	6.86745	2.62342	2.21511	1.55367	14.1927	5.48299	8.77691	11.3233	2.58691
pHC12	Healthy	1.6	M	Black	B1	7.37623	13.1546	10.9938	2.90643	2.74013	3.36893	6.9143	3.65494	10.1434	8.03055	11.0261	2.21965	6.48365	12.6092	4.0621	7.06748	4.34155	8.86155	1.94648	5.7981	9.31978	1.32135	-0.25776	3.91592	1.65583	12.4652	2.1897	8.34367	8.44666	10.536	9.58558	2.66167	4.32727	14.6239	7.53129	5.55399	3.46949	1.28862	1.81072	15.7028	5.48765	4.54551	11.1267	2.8323
pHC_C1	Healthy	2	M	White	B1	6.46009	11.4994	10.9256	2.31687	2.37822	2.67501	6.62763	3.1581	9.87146	7.28235	10.3734	2.68918	6.16918	12.1688	2.9679	7.19182	3.20551	8.88361	1.59645	6.11762	8.73831	1.17202	-0.60548	4.75686	1.47176	10.3949	2.15861	8.44257	7.80933	9.95501	8.67824	2.48845	4.01563	13.7168	6.8206	5.45516	2.74302	1.02084	1.44771	13.6108	4.87211	3.26379	10.5939	2.51034
pHC_C10	Healthy	8.2	M	Black	B1	6.37731	11.6417	10.3545	3.40134	2.64075	3.21207	6.25665	3.84335	10.3745	7.65534	10.3158	2.98675	4.30705	10.8434	4.38113	7.00647	3.04054	8.49529	1.99317	7.39477	6.63423	1.5655	-0.63727	4.04445	1.89488	12.4669	2.51606	7.16352	7.18015	9.67845	9.06259	2.89115	3.85047	13.5242	7.08994	5.06635	2.86096	1.62485	1.5438	15.1771	4.42975	3.90401	10.9269	2.38585
pHC_C11	Healthy	9	F	White	B1	6.92626	11.3381	9.87021	2.49306	2.11151	2.70986	6.70883	3.66494	10.0986	7.80437	10.0975	1.89576	4.61598	12.3861	3.81195	7.14429	4.17966	9.00376	1.18221	7.26867	6.60382	1.03257	-1.08945	5.29105	1.25389	11.0273	1.38146	7.4878	7.12938	9.60891	8.83703	2.36215	4.09022	15.138	7.77765	6.34748	2.42772	1.00462	1.08048	14.3751	4.42343	3.47137	9.72794	2.46506
pHC_C12	Healthy	10.7	F	Biracial	B2	7.40651	11.6944	11.6677	3.21806	3.12867	3.49027	7.46516	3.65888	10.6542	8.5425	10.9719	2.41827	4.27302	13.001	3.0657	8.57342	3.49729	9.00394	1.69596	7.71732	7.67628	2.14661	-0.66313	4.786	1.53925	11.4249	2.6034	7.85173	9.02157	10.0319	10.6676	2.96549	4.71948	16.2812	8.93423	6.73275	3.08897	2.50422	1.96501	15.996	5.44255	4.37809	11.6162	2.66103
pHC_C13	Healthy	11.9	M	Black	B2	7.88402	12.1929	10.4617	3.50503	3.20706	3.94904	7.22452	4.04561	10.7977	7.59805	10.2845	2.97296	7.74716	12.4086	4.08207	8.89513	4.21493	9.78821	1.61854	8.63428	6.74887	1.93937	-0.80182	4.80873	1.87136	10.973	2.17922	8.22831	8.10961	9.88246	9.29659	2.75605	3.7754	13.4423	7.76059	5.61307	2.2301	0.997365	1.45725	15.3895	5.35755	5.29376	12.1591	2.43834
pHC_C14	Healthy	12.3	M	Black	B1	6.62055	11.429	10.8174	2.38048	2.20503	2.77963	6.98676	3.07271	10.7774	7.69228	10.3348	2.61042	3.99343	11.232	2.58105	8.54142	3.02111	8.7852	1.28686	5.94029	7.49518	1.28837	-1.05331	4.32543	1.27451	12.2294	2.03884	7.82143	8.36843	9.77488	9.42506	2.74147	4.29839	14.9924	6.66262	5.30897	2.3181	1.18202	1.20917	15.4036	4.61461	3.88717	10.6242	1.97765
pHC_C15	Healthy	15.2	M	White	B1	6.29669	11.542	11.0123	2.73313	2.22028	2.97156	6.52284	2.9484	9.98641	7.07997	10.3823	3.08229	3.71801	11.5687	2.68097	6.99192	3.27017	8.75802	1.46498	6.56242	7.59845	1.30042	-0.81992	4.6479	1.74043	10.2216	2.28468	7.0261	8.76806	9.3841	9.43446	2.90675	3.66341	13.9218	6.94996	5.33315	2.73936	1.46096	1.52229	15.1764	4.41231	5.5271	10.6351	2.13228
pHC_C16	Healthy	16.9	M	White	B1	6.20165	11.7657	11.3244	1.92919	2.27015	3.11634	7.11326	2.51615	10.0507	7.61101	10.4693	1.88506	4.54002	11.523	2.19489	7.77365	2.51104	9.05169	1.54601	6.98951	7.43248	0.78522	-0.71076	4.06381	1.2934	9.6462	1.75468	6.53531	8.75683	9.9351	9.86384	2.60433	3.64572	12.9814	7.37656	5.49977	2.52573	1.36677	1.35533	12.814	4.51747	3.04795	11.8836	2.67482
pHC_C17	Healthy	18.3	M	Black	B1	6.26123	12.2458	10.9945	3.22118	1.73534	3.3997	7.47634	3.83369	10.549	8.34818	10.209	1.92973	3.77957	11.0675	4.92606	7.12919	4.31827	9.01364	3.81097	7.30961	7.42125	1.72551	-0.87952	4.46385	1.18011	11.2107	2.43746	6.35641	8.52735	10.0797	9.82927	3.386	3.94431	14.9597	7.67357	6.14057	2.27908	2.73225	1.74182	15.5186	4.84799	6.66207	10.0632	2.56424
pHC_C2	Healthy	2.23333	F	White	B1	7.15603	12.512	11.7474	3.0888	2.46729	3.27482	7.33901	3.67384	11.0498	8.04773	10.8736	2.54298	5.03773	12.3433	3.06294	6.98207	4.18738	9.37319	2.42877	6.92742	8.87693	1.21913	-0.96536	3.84822	1.31865	10.5983	1.89444	8.49094	8.54083	10.3621	9.43704	3.33153	3.90409	14.4798	7.8603	6.29928	2.55091	1.37416	1.42667	15.4305	5.19611	4.62516	10.6455	3.01707
pHC_C3	Healthy	2.73333	F	Hispanic	B1	7.25928	11.8157	10.7851	2.53446	2.41888	3.76424	6.95682	4.29861	10.2845	7.98188	10.6529	1.93871	4.18635	12.5321	3.96131	7.29691	3.37305	9.09215	1.35263	7.41705	8.44535	1.19286	-1.02577	4.23419	0.97747	10.7663	1.79827	8.11599	8.67024	9.95788	9.41471	2.63783	3.67145	13.6679	6.8372	5.2733	2.33319	1.12614	1.20182	16.2532	5.10958	3.43502	10.5907	2.19532
pHC_C4	Healthy	3.06667	M	Biracial	B1	6.77823	12.2335	10.6935	2.89221	2.49998	3.18627	6.76023	3.88241	10.198	7.3298	10.5605	1.99042	4.02192	12.7978	3.24578	6.4388	3.46457	9.02339	1.42665	6.01703	9.92233	1.32256	-0.82666	3.60365	1.54162	10.3804	1.47927	7.98056	8.35035	10.1388	9.60362	2.64156	3.2893	13.6453	7.22395	5.52479	3.23953	1.50774	1.15896	14.7202	4.6695	5.94941	10.4597	2.22866
pHC_C5	Healthy	5.2	F	White	B1	6.99209	12.2848	10.6096	2.48688	2.70169	3.02116	6.3463	3.03724	10.4588	7.64595	10.1792	2.53469	6.16841	12.321	4.72962	6.87196	4.96747	8.9221	1.53747	6.15383	9.32088	1.25104	-0.96895	5.16378	1.69926	9.94489	2.64986	7.12807	7.4151	9.8455	9.38953	2.37073	4.04877	14.0629	7.80988	6.09972	2.96487	1.23179	1.54729	15.4111	4.83797	4.39096	10.5306	2.23342
pHC_C6	Healthy	5.9	M	Biracial	B1	7.39676	11.8092	11.1366	2.11519	2.56118	3.14164	6.53342	2.54379	10.3812	7.5767	10.3471	2.98747	5.7664	12.7601	3.21556	8.23793	2.9628	9.41433	1.72282	7.59478	8.16521	1.32088	-0.996	5.20694	1.26048	10.6577	1.68593	7.48598	7.71172	9.74476	10.4684	2.779	3.82673	14.2624	7.4929	5.89462	2.87927	1.48808	1.3705	15.0637	4.75806	3.79764	11.7407	2.782
pHC_C7	Healthy	7.2	M	White	B1	7.21522	12.2528	10.997	3.03968	2.28253	3.38766	7.31632	3.482	10.7084	8.3316	10.5573	2.2203	4.36363	12.9991	2.97509	8.51431	4.06698	8.60596	1.61133	7.49291	7.51223	1.84266	-0.74076	4.08498	1.60349	10.9662	2.04324	7.67107	8.19618	9.73223	9.88911	2.55908	4.02568	15.7991	7.75243	5.91442	3.07288	1.48418	1.74161	14.6439	4.92366	5.57371	11.3368	2.82982
pHC_C8	Healthy	7.7	F	Black	B1	6.90794	12.5688	10.6403	3.29522	2.20893	2.88693	7.21833	3.14971	10.0358	7.61655	10.148	2.5544	3.98316	12.6285	2.65371	7.82682	4.179	9.04713	1.45474	6.89788	8.15508	1.58796	-1.03547	3.79099	1.66737	10.847	1.83923	6.97076	8.14705	9.81983	10.7438	2.70107	3.82564	14.9455	8.30627	5.61173	2.42171	1.26798	1.41061	15.7897	5.01531	5.11218	10.9155	2.6645
pHC_C9	Healthy	8	M	White	B2	6.56781	11.9581	11.5306	3.9479	2.82705	3.64573	7.29174	3.1685	10.1602	7.86371	10.3474	2.0728	3.46921	11.5007	3.69725	9.07492	3.9998	8.91413	1.85912	7.39649	6.1863	1.90881	-0.66569	4.76049	1.55565	10.6282	3.45122	7.73407	8.70689	9.75666	11.0862	4.11095	4.30117	14.5644	8.68243	6.70815	2.5304	4.00193	1.6021	14.8167	5.16615	3.8312	10.7494	2.75724
pRSV1	RSV G3	1.47	F	Biracial	B1	8.71176	12.5808	10.2865	4.10659	2.53827	4.18044	6.48935	4.40838	9.562	7.98203	9.59603	5.79337	6.97693	12.9653	3.3309	9.01603	6.04905	8.11753	1.58966	7.2073	7.73461	3.72999	-0.68925	7.14538	1.98426	11.2648	1.96067	8.43256	6.98376	8.54166	8.98247	2.65284	4.64195	13.0656	7.05849	7.35366	3.02919	2.03603	1.33759	15.9479	4.71862	10.6829	11.0031	3.18853
pRSV10	RSV G2	1.4	M	White	B1	7.86867	12.4667	11.3462	2.78984	2.92146	3.73717	7.17408	4.10925	9.84701	7.94933	10.2424	3.61044	5.40075	12.7428	3.34322	7.80922	4.67388	9.62466	1.57672	7.009	9.40137	1.49228	-0.57152	6.15212	2.02099	12.0286	2.25446	8.39625	7.43925	9.84271	8.97336	2.59216	4.83919	14.2205	7.3391	7.2654	3.36522	1.90232	1.55677	15.1192	4.80852	6.03138	11.0124	3.08534
pRSV11	RSV G2	10.5	F	White	B1	7.60095	12.3294	10.7397	4.35816	2.51481	4.04092	6.44203	3.89963	10.0608	7.27181	10.0648	5.95394	6.16607	11.8671	3.704	7.54519	5.22863	8.37678	1.41903	5.06733	6.1739	2.6725	-0.64972	7.32733	1.9671	10.4122	2.27909	7.01032	7.33475	8.95764	9.39148	3.19665	4.39557	12.5139	7.12411	7.2124	2.6429	2.47215	1.68691	14.7021	5.11275	7.18921	10.8484	2.23326
pRSV12	RSV G1	1.1	M	White	B1	7.26481	12.1703	11.4578	2.16964	2.5243	3.71338	7.00592	2.93847	10.2396	7.80472	10.4073	2.77989	5.93356	11.8405	3.42607	7.20139	4.75558	9.34702	1.83209	6.25542	9.10188	1.43553	-0.75318	4.02676	1.26764	9.56728	1.76542	8.13985	7.77504	9.87801	9.35166	2.50642	3.6818	12.7361	7.06047	5.48561	2.97824	3.75728	1.72731	14.2158	4.81602	3.35419	10.4043	2.57176
pRSV13	RSV G1	4.3	F	White	B1	8.89236	12.0989	11.5382	3.16958	2.62242	3.71245	7.15805	3.81516	10.0391	7.82512	10.7051	4.34357	6.1866	12.2417	3.03951	9.40405	5.34305	9.22553	1.9937	6.97289	7.06893	1.81319	-0.80242	3.92859	1.6414	11.2296	2.07573	6.99955	7.90917	9.37775	10.145	2.97399	3.16669	13.7613	7.73536	5.97989	2.67307	1.91752	1.42261	13.653	4.69784	4.75576	10.7078	2.84121
pRSV2	RSV G3	1	M	White	B1	9.77536	12.0044	10.5572	5.16508	2.83506	4.12995	5.95592	3.55269	10.2411	6.94654	9.76547	8.0682	6.08252	14.0077	3.491	12.4633	2.8864	9.67302	1.73083	7.35313	9.62721	1.44505	-0.40734	5.55479	1.93763	11.0366	1.82075	7.68206	6.91449	8.72979	9.04715	2.45942	4.08191	13.6909	7.21669	6.23468	4.01888	1.59838	1.47079	14.5844	5.01623	11.0608	12.31	3.3204
pRSV3	RSV G2	12.8	M	White	B1	8.00615	12.357	11.2855	3.9462	2.90267	4.51055	7.0074	3.90987	10.3587	6.87866	10.7175	6.72106	5.63359	11.7501	4.03169	11.6315	4.26636	9.14745	1.68855	6.80215	6.83828	1.50182	-0.56176	7.02809	1.41021	10.3926	2.0287	7.69275	7.70291	8.43125	10.5489	2.99865	4.14533	13.0804	7.2355	5.86972	2.23918	2.15884	0.93159	14.887	5.17413	4.14991	11.5706	2.03815
pRSV4	RSV G2	2.4	F	White	B1	7.043	11.9404	10.8755	3.01735	2.68331	2.89413	6.34154	4.03125	10.0111	7.68694	9.59774	6.0706	6.80923	11.538	2.84424	8.00373	4.19839	8.76317	1.5538	5.341	7.62703	1.66688	-0.75098	7.37437	1.92622	11.0203	1.69256	8.12913	6.78458	8.61681	9.48726	2.48503	4.94642	12.7001	6.76855	6.85443	2.68937	1.84578	1.22969	14.0599	4.61692	5.57593	9.93622	2.2216
pRSV5	RSV G2	0.8	M	White	B1	9.10021	12.383	10.9952	2.60237	2.04959	3.63294	6.80357	3.37041	9.80548	7.68934	10.1065	3.5925	7.07307	12.807	3.18139	9.44236	3.94772	9.32059	1.58131	6.58664	8.20367	1.48291	-0.76514	5.27829	1.62712	11.0354	2.11268	6.96542	7.90508	9.86477	9.30691	2.11523	3.93555	11.915	6.28316	5.83736	3.53336	1.42517	1.44978	15.0345	4.94218	4.39372	12.3046	3.20678
pRSV6	RSV G2	2.8	F	Biracial	B1	7.54146	11.7857	11.7457	2.78923	2.55212	3.35467	6.3887	3.27542	9.97295	7.05664	10.2159	4.588	5.60685	12.2054	3.7384	8.18734	3.502	8.72552	1.61842	6.61527	8.56749	1.51329	-0.8427	5.08392	1.6759	10.1459	1.84863	7.35126	7.21336	9.241	9.0395	2.55012	4.14031	12.8773	6.53897	5.63186	2.9004	1.53924	1.28215	14.9477	4.41697	5.47972	10.6389	2.81779
pRSV7	RSV G1	13.7	F	White	B2	8.97957	11.208	11.2792	4.62833	2.99768	4.93736	6.5735	3.16597	10.1593	7.16129	10.5535	5.00532	5.56346	12.4143	3.35841	11.9488	3.83554	8.9098	1.54017	7.51155	6.39725	1.48686	-1.01297	5.33753	1.67464	11.1547	2.81068	7.10464	8.59124	8.8461	10.9265	2.73036	3.45629	12.9837	7.07994	5.42061	2.51405	2.07942	1.42145	14.6118	5.42002	3.24938	10.5118	2.48705
pRSV8	RSV G1	5.37	M	Black	B1	7.30872	12.2864	10.4374	2.65545	2.74334	3.49287	7.07499	4.56729	10.4257	7.83125	10.1379	2.85047	6.46768	11.4954	3.18035	6.69492	4.99032	9.09899	1.74201	6.65316	7.79917	1.50207	-0.5605	5.48443	1.83994	12.3613	2.04839	8.72505	7.8377	9.99325	9.59129	2.54216	4.88625	13.39	7.23723	6.38454	3.0983	2.52645	1.65631	16.5517	4.62263	5.46981	11.3833	2.49037
pRSV9	RSV G1	1.8	M	White	B1	7.89494	11.8023	11.3793	2.77936	3.48886	3.91219	6.9926	3.62278	9.96586	7.73843	10.5023	3.47294	6.3712	12.7041	3.50174	6.93117	3.64995	9.41144	1.64005	6.0532	9.01029	1.18854	-0.81064	3.93473	1.84656	10.8269	1.91732	8.25563	8.32984	9.68846	9.70194	2.64609	3.74686	13.6885	7.10234	5.92219	3.54119	1.29733	1.5792	14.0976	4.96873	6.0479	10.5402	3.23353
[truncated: 48 more columns]

## Sheet: Clinical Group Legend
Clinical Group	Description
COVID_G1	Subacute COVID-19
COVID_G2	Moderate COVID-19
COVID_G3	Severe COVID-19
COVID_G3_S	Severe T COVID-19 (Steroid Treated)
RSV_G1	Mild RSV
RSV_G2	Moderate RSV
RSV_G3	Severe RSV
COVID_G2G3	Moderate+Severe COVID-19 (No Steroid Treatment)
RSV_G1G2G3	Mild+Moderate+Severe RSV

## Sheet: LOD
Cytokine	UniProt	OlinkID	B1	B2
CXCL8	P10145	OID00471	2.06933	2.04131
VEGFA	P15692	OID00472	2.50766	1.5694
CD8A	P01732	OID05124	1.76478	1.85876
CCL7	P80098	OID00474	2.13621	2.33056
GDNF	P39905	OID00475	2.65859	2.50766
CDCP1	Q9H5V8	OID00476	1.32394	1.1972
CD244	Q9BZW8	OID00477	2.47822	2.37087
IL7	P13232	OID00478	1.24766	1.2555
TNFRSF11B	O00300	OID00479	1.51425	1.25463
TGFB1	P01137	OID00480	1.20562	0.85715
PLAU	P00749	OID00481	1.91486	1.6055
IL6	P05231	OID00482	2.20547	1.71469
IL17C	Q9P0M4	OID00483	2.48999	1.95303
CCL2	P13500	OID00484	1.85859	1.40989
IL17A	Q16552	OID00485	1.92231	1.99734
CXCL11	O14625	OID00486	1.46965	2.28794
AXIN1	O15169	OID00487	1.287	1.19243
TNFSF10	P50591	OID00488	2.00213	1.43058
IL20RA	Q9UHF4	OID00489	1.59706	1.38556
CXCL9	Q07325	OID00490	1.48168	1.6568
CST5	P28325	OID00491	0.69861	0.43657
IL2RB	P14784	OID00492	1.9706	1.89385
IL1A	P01583	OID00493	0.13319	-0.12258
OSM	P13725	OID00494	2.56521	1.35629
IL2	P60568	OID00495	2.32728	1.82905
CXCL1	P09341	OID00496	2.54992	2.4758
TSLP	Q969D9	OID00497	2.52104	2.64292
CCL4	P13236	OID00498	1.65639	1.17151
CD6	P30203	OID00499	2.7483	2.40337
KITLG	P21583	OID00500	1.89687	1.58896
IL18	Q14116	OID00501	2.45057	1.2179
SLAMF1	Q13291	OID00502	2.19397	2.16443
TGFA	P01135	OID00503	1.66968	0.907255
CCL13	Q99616	OID00504	3.47391	3.36517
CCL11	P51671	OID00505	2.10388	2.4171
TNFSF14	O43557	OID00506	2.04986	2.07695
FGF23	Q9GZV9	OID00507	2.9295	2.48181
IL10RA	Q13651	OID00508	1.12747	1.13291
FGF5	P12034	OID00509	1.3753	1.21995
MMP1	P03956	OID00510	2.37843	1.0818
LIFR	P42702	OID00511	1.62313	1.50967
FGF21	Q9NSA1	OID00512	2.66109	2.48316
CCL19	Q99731	OID00513	2.14845	2.01837
IL15RA	Q13261	OID00514	1.51757	1.17571
IL10RB	Q08334	OID00515	1.44936	1.34665
IL22RA1	Q8N6P7	OID00516	3.29774	2.44394
IL18R1	Q13478	OID00517	2.28542	2.00566
CD274	Q9NZQ7	OID00518	2.3587	2.44012
NGF	P01138	OID00519	0.8767	0.59978
CXCL5	P42830	OID00520	2.72131	2.5536
TNFSF11	O14788	OID00521	1.77322	1.27643
HGF	P14210	OID00522	1.57321	1.28426
IL12B	P29460	OID00523	1.45734	0.93781
IL24	Q13007	OID00524	2.20444	1.90541
IL13	P35225	OID00525	1.65266	1.38569
ARTN	Q5T4W7	OID00526	1.71783	1.6925
MMP10	P09238	OID00527	1.81594	1.71714
IL10	P22301	OID00528	2.48832	2.43416
TNF	P01375	OID05548	0.96645	0.41717
CCL23	P55773	OID00530	1.03769	1.05424
CD5	P06127	OID00531	1.06776	0.77783
CCL3	P10147	OID00532	1.60148	0.98137
FLT3LG	P49771	OID00533	2.61699	1.73829
CXCL6	P80162	OID00534	1.5563	1.82052
CXCL10	P02778	OID00535	2.42265	3.16182
EIF4EBP1	Q13541	OID00536	1.65372	1.41179
IL20	Q9NYY1	OID00537	1.31779	1.04633
SIRT2	Q8IXJ6	OID00538	3.91333	3.27828
CCL28	Q9NRJ3	OID00539	1.908	1.58479
DNER	Q8NFT8	OID01213	0.71205	0.455075
S100A12	P80511	OID00541	1.77109	1.60992
CD40	P25942	OID00542	2.66251	2.18172
IL33	O95760	OID00543	2.04989	1.79846
IFNG	P01579	OID05547	5.04018	3.50685
FGF19	O95750	OID00545	1.88408	1.58525
IL4	P05112	OID00546	1.07393	1.01233
LIF	P15018	OID00547	0.96706	0.69906
NRTN	Q99748	OID00548	1.22131	1.1766
CCL8	P80075	OID00549	2.31759	2.35898
CASP8	Q14790	OID00550	1.76633	0.98185
CCL25	O15444	OID00551	1.95202	1.57236
CX3CL1	P78423	OID00552	2.0198	1.73465
TNFRSF9	Q07011	OID00553	2.64597	2.21137
NTF3	P20783	OID00554	2.12899	1.8972
TNFSF12	O43508	OID00555	1.31457	0.250695
CCL20	P78556	OID00556	2.44806	3.16474
SULT1A1	P50225	OID00557	1.62241	1.24686
STAMBP	O95630	OID00558	1.45212	1.44655
IL5	P05113	OID00559	2.22395	2.01462
ADA	P00813	OID00560	1.05001	0.94182
LTA	P01374	OID00561	1.83138	1.3127
CSF1	P09603	OID00562	1.83209	1.34351

## Sheet: PCA
Sample ID	PC 1	PC 2	PC 3	PC 4	PC 5	PC 6	PC 7	PC 8	PC 9	PC 10
CXCL8	0.18918	0.0801281	-0.0612684	0.064576	-0.0413784	-0.130859	0.0611395	-0.0246201	0.029485	0.0799206
VEGFA	0.121375	-0.115056	0.0491119	-0.152382	-0.00244806	-0.0422812	-0.135845	-0.053476	-0.0450297	-0.0856446
CD8A	-0.0144178	-0.0480651	-0.0955815	0.124058	-0.187339	0.186551	-0.0932816	0.169431	0.0521096	-0.32467
CCL7	0.149948	0.103618	0.0746209	0.145484	-0.0381774	-0.110069	-0.0270655	-0.121164	0.0230524	0.0769832
GDNF	0.140949	-0.0542234	-0.013951	0.0385158	0.0897203	0.117951	0.00372577	0.0847665	0.0205091	-0.00751476
CDCP1	0.183548	0.00822299	0.0143183	0.139201	-0.0962167	0.0330382	-0.0182649	0.133564	0.00861098	-0.0509421
CD244	0.0332259	-0.182725	0.118784	0.024467	-0.189469	0.0759689	-0.0651258	0.00322856	-0.180437	0.11264
IL7	0.0918639	-0.0383883	0.181082	-0.105858	-0.026021	-0.0748108	0.0574043	0.176592	-0.0135867	0.148045
TNFRSF11B	0.00702041	-0.130172	0.0756757	0.125014	0.00746453	0.256308	0.00838032	0.0294145	-0.0441462	0.0897954
TGFB1	0.020145	-0.21751	0.122524	-0.0884418	0.0619074	-0.0731978	-0.0651133	0.0065664	0.018457	0.00683038
PLAU	0.0611358	-0.192341	-0.121726	0.0510812	-0.0546358	0.191784	-0.114446	0.0391227	-0.131255	0.0210935
IL6	0.167883	0.143928	0.0247291	0.024785	0.100493	0.152988	-0.0412255	0.000326918	-0.038993	0.00638458
IL17C	0.175508	0.046149	-0.0405044	-0.0494984	0.0477842	0.0255555	0.117162	-0.00581097	0.0462427	-0.074964
CCL2	0.172646	-0.0655953	-0.0743825	-0.00113739	-0.00552986	0.0032443	0.152472	-0.23455	0.0720889	0.0692328
IL17A	0.0572315	-0.0842061	0.149204	0.0611774	0.0562518	-0.0327129	0.0320985	-0.156176	-0.037055	-0.0864144
CXCL11	0.132812	0.0717034	-0.0097838	0.239096	-0.0129682	-0.0305482	0.110866	0.0149892	-0.0299429	0.00299735
AXIN1	0.126654	-0.0348098	0.160539	-0.19024	0.0156199	-0.0208345	-0.0775754	-0.0378017	-0.12724	-0.0126761
TNFSF10	0.144582	-0.0999166	-0.154364	0.0591728	0.0213018	-0.0513718	-0.00188093	-0.00747715	-0.0860566	0.088725
IL20RA	-0.0166449	-0.0396775	0.0726945	0.078451	-0.0586487	-0.238006	-0.275124	-0.00427025	0.0126743	-0.24626
CXCL9	0.0383001	-0.0664121	0.0492123	0.267234	-0.0745006	-0.142311	0.238488	-0.0743858	0.0116988	0.00276784
CST5	0.0670034	-0.105209	-0.194403	-0.200241	0.0677747	-0.00635259	-0.0243267	-0.0533028	-0.00600506	-0.0843183
OSM	0.149461	0.0893589	0.173565	0.0102954	0.104918	0.149665	0.108142	-0.0620459	-0.0476759	-0.0922061
CXCL1	0.0823345	-0.103696	0.0317509	0.0361586	0.222168	-0.168812	-0.0571779	0.178388	0.0425134	0.0516582
CCL4	0.0777483	-0.10219	-0.0358365	-0.124707	0.0384015	0.0127438	0.119785	0.317262	0.0777617	-0.0720207
CD6	-0.0738776	-0.12394	0.0219133	0.104973	-0.250562	0.180018	0.00511601	0.0933954	-0.00725914	-0.0211302
KITLG	-0.0875126	-0.193267	-0.0705838	-0.0889945	-0.0782153	0.0812401	-0.00797138	-0.0744465	0.00220106	-0.0814715
IL18	0.0268332	-0.0243333	0.0643461	0.163692	-0.142726	0.0181222	-0.111018	-0.0126762	-0.0634251	0.284628
SLAMF1	-0.0397388	-0.0645086	0.172959	0.150786	-0.18558	0.0973643	-0.143142	-0.0208083	0.0630603	-0.085329
TGFA	0.0938607	-0.061844	0.174586	-0.0429009	0.187832	0.18818	0.0739013	-0.0886169	0.061296	-0.125992
CCL13	-0.0120026	-0.185342	0.117366	0.126522	0.0493551	-0.0583978	0.0904006	-0.115747	0.0444782	0.0810565
CCL11	0.0448767	-0.164052	0.137354	0.147109	0.0123443	-0.122405	0.0512285	-0.203544	-0.0493406	-0.0205819
TNFSF14	0.129347	-0.0235077	0.213355	-0.0820669	0.0404682	0.111732	-0.0360477	-0.00408918	0.122862	-0.028459
FGF23	0.145892	-0.0623194	-0.105846	-0.133934	0.112571	0.0500978	-0.000121658	-0.185595	0.106555	-0.0570011
IL10RA	0.0505578	-0.0206162	0.115734	0.142401	-0.126458	-0.00516013	-0.161496	0.0431628	0.1007	-0.197638
FGF5	0.0613921	-0.15236	-0.0374561	-0.0242863	0.0253991	-0.0535316	-0.267282	-0.0452343	0.171548	-0.103875
MMP1	0.0470486	-0.121466	0.0836807	-0.0391111	0.066224	-0.0824929	0.17044	0.0878286	-0.0279341	0.0876312
LIFR	0.147897	-0.127452	-0.0728316	0.115456	0.0421405	0.0646485	-0.0518777	0.145487	-0.0893931	-0.0717026
FGF21	0.0491251	0.0714633	0.154052	-0.0249406	-0.0330837	-0.0583678	0.0386133	0.0111876	0.387014	-0.0116692
CCL19	0.144257	-0.0540676	-0.130554	0.102584	0.0418538	0.0529669	0.0899498	-0.014456	-0.00710401	0.000371717
IL15RA	0.159122	-0.0522453	-0.130842	-0.0194643	-0.0712289	-0.0765611	-0.0512007	-0.120693	0.203787	-0.0483552
IL10RB	0.0721419	-0.151149	-0.0694948	-0.193032	-0.018599	0.0341807	-0.027951	-0.1082	0.115393	0.17159
IL22RA1	0.134216	-0.0770593	-0.0615082	0.041029	-0.0124789	-0.0619751	-0.230209	-0.104675	-0.010425	0.0307169
IL18R1	0.181483	0.00181397	-0.074307	0.0430756	0.0697769	0.122038	-0.042853	0.121882	-0.0880873	0.0584619
CD274	0.19546	0.0162849	-0.107017	0.109642	0.00191131	-0.055591	-0.0397523	0.002652	-0.0262001	0.0110977
CXCL5	0.00102933	-0.16515	0.139518	-0.0757316	0.149445	-0.119108	0.0445746	0.230069	-0.0150736	0.0936291
TNFSF11	-0.00636795	-0.14986	-0.0926237	-0.108533	-0.14953	-0.191022	0.084314	-0.0386043	-0.0191192	0.0443428
HGF	0.0729416	-0.0948288	0.24122	-0.0375113	0.0733141	0.151198	0.0747969	-0.0437217	0.0284338	-0.0780404
IL12B	0.092168	-0.133761	-0.16612	0.0255863	-0.12954	0.133945	0.0634314	0.0334889	-0.0512688	0.0539419
IL24	0.0993839	0.0719557	0.117273	0.03548	-0.0575243	-0.0959616	-0.249483	-0.143391	0.0529763	0.0555583
ARTN	0.0600393	0.0644152	0.144089	-0.0127793	-0.0855728	0.136279	-0.071108	0.129758	-0.018363	-0.0151129
MMP10	0.128838	0.0880913	0.0823506	-0.0927409	0.0645512	-0.0267026	0.0971237	0.096972	0.109811	-0.0542147
IL10	0.155643	0.102294	-0.0334571	0.115749	-0.09377	-0.0430461	0.0757979	0.0199321	0.167127	-0.0422452
TNF	0.153601	-0.0714029	-0.00060376	0.184533	-0.0164665	0.0143897	-0.0391117	-0.0472532	0.00665813	0.0895962
CCL23	0.127486	0.00624428	0.161634	0.0301137	-0.0462963	0.152955	0.0580707	-0.000217584	0.0168478	-0.205826
CD5	-0.0267955	-0.168433	-0.0387519	-0.0581768	-0.278845	0.0474722	0.0453124	0.116886	-0.0633159	-0.101952
CCL3	0.0589168	-0.042545	-0.136362	-0.0633331	0.100818	-0.0229015	-0.0860491	0.208154	0.0561201	-0.147087
FLT3LG	0.0851715	-0.159276	-0.150091	-0.00960542	0.0290112	-0.105457	0.0126808	-0.125557	-0.0449808	-0.22108
CXCL6	-0.0324425	-0.155653	0.141575	0.055294	0.193954	-0.145268	-0.0421896	0.155631	0.0076458	0.00877563
CXCL10	0.162434	0.0537387	-0.0307414	0.196224	0.0702452	-0.0702783	-0.00759078	0.0321845	-0.0295603	-0.0203709
EIF4EBP1	0.112873	0.0583772	-0.00360275	-0.192349	-0.250693	-0.0304097	0.0581964	-0.0364918	-0.113294	-0.0252959
IL20	0.13681	-0.00410772	0.010079	-0.0966523	-0.0264581	-0.0657358	-0.154888	0.00983531	0.224626	0.103448
SIRT2	0.140366	0.0736433	0.0502849	-0.153745	-0.233355	-0.0995955	0.0652785	-0.0206627	-0.117129	-0.0324767
CCL28	0.0284347	0.015881	0.146987	0.047428	0.0196971	-0.166268	0.0806753	0.16146	-0.200702	-0.162113
DNER	0.0047865	-0.249337	0.00654021	-0.0908909	-0.0075394	0.0404026	0.0731812	0.123658	-0.0129901	0.0610061
S100A12	0.0694712	0.0528538	0.203074	0.0250942	0.0360492	0.196749	0.102969	-0.0504792	-0.0263532	0.0816168
CD40	0.0560491	-0.146271	0.0885725	-0.0650266	-0.118369	-0.0714476	0.0167318	-0.0432156	-0.038748	0.0393901
IFNG	0.127267	0.134847	-0.044447	0.0632669	-0.145817	-0.0785051	0.116366	0.153862	0.173602	0.0380181
FGF19	-0.0497896	-0.0170654	0.060071	-0.0168586	-0.130295	-0.0159569	0.0176986	0.150544	0.340986	0.214306
IL4	0.0369074	-0.0446348	0.110629	-0.0240207	-0.00485962	0.0740532	-0.0966199	0.119563	0.190165	0.240201
LIF	0.124783	0.0529817	0.0237096	-0.0199088	0.00829463	0.253361	-0.157207	-0.158986	-0.0268353	0.0112739
NRTN	0.0529719	0.005884	0.0898802	-0.073293	0.00368427	-0.0643923	-0.269916	-0.0571303	-0.189425	0.213318
CCL8	0.159728	-0.0332276	-0.0708532	0.106375	0.0754352	-0.0670724	-0.136933	0.137865	-0.106468	0.15602
CASP8	0.150887	0.0896505	0.102112	-0.11982	-0.164282	-0.0350595	0.0689403	0.0291698	-0.204169	-0.0151415
CCL25	0.022966	-0.195835	-0.0332683	0.0573365	0.0912608	-0.0757866	0.222345	0.0601864	-0.062653	-0.0865819
CX3CL1	0.159354	-0.0296272	-0.201819	0.0389098	0.0324991	0.0105578	-0.0620373	0.0870326	0.0181916	0.10634
TNFRSF9	0.0150058	-0.187398	-0.00796859	-0.0959323	-0.113408	-0.00459245	0.151953	-0.13981	0.232765	-0.0666858
NTF3	-0.047135	-0.193561	0.0463552	0.0620778	-0.0626522	-0.021821	-0.0483637	-0.0984528	0.152492	-0.0663417
TNFSF12	-0.093031	-0.191236	0.11724	0.0779694	-0.124718	0.0348315	0.0315067	0.0619529	0.0449712	0.0896456
CCL20	0.118724	-0.105547	0.0621917	0.101558	0.12423	-0.0636656	0.142883	-0.144161	-0.0625067	-0.0768608
SULT1A1	0.125366	-0.0289263	0.113897	-0.223516	-0.00408709	-0.0877617	-0.0949822	0.0255279	-0.154589	-0.0238538
STAMBP	0.13474	0.0778669	0.0381965	-0.157522	-0.233283	-0.0933397	0.103118	0.000819736	-0.133632	-0.0275697
IL5	-0.0267965	0.0566316	0.124912	0.0844607	-0.0119225	-0.238661	-0.146132	0.124415	-0.00656885	-0.243103
ADA	0.127065	0.0857509	0.0299602	-0.0658255	-0.21782	-0.0987422	0.104975	0.0308235	0.0680137	0.0280035
LTA	-0.0445791	-0.113266	-0.0700345	0.171619	-0.0935165	-0.107513	0.0608037	-0.00548506	-0.0431755	0.0836715
CSF1	0.190652	0.0152217	-0.0994897	-0.0878881	0.0156689	0.101835	-0.0377543	0.166346	0.0794347	-0.0491423

## Sheet: Group Comparison
Cytokine	Comparison	Direction (+ vs -)	KW P-Value	Dunn Adjusted P-Value	MW P-Value	KW p.adjust	p.adjust
CXCL8	COVID vs Healthy	+	9.73198e-06	8.99687e-05	4.83938e-05	0.000165444	0.00112186
CXCL8	RSV vs Healthy	+	9.73198e-06	0.000138273	8.04164e-05	0.000165444	0.00170885
CXCL8	RSV vs COVID	-	9.73198e-06	0.807012	0.758316	0.000165444	0.858231
VEGFA	COVID vs Healthy	+	0.107733	0.105146	0.0521911	0.157884	0.12675
VEGFA	RSV vs Healthy	+	0.107733	0.322663	0.270948	0.157884	0.421292
VEGFA	RSV vs COVID	-	0.107733	0.322663	0.238204	0.157884	0.384444
CD8A	COVID vs Healthy	-	0.702874	0.691398	0.67424	0.728589	0.793665
CD8A	RSV vs Healthy	+	0.702874	0.691398	0.435023	0.728589	0.612878
CD8A	RSV vs COVID	+	0.702874	0.691398	0.681618	0.728589	0.793665
CCL7	COVID vs Healthy	+	0.226194	0.254249	0.133303	0.29131	0.259484
CCL7	RSV vs Healthy	+	0.226194	0.254249	0.179897	0.29131	0.323054
CCL7	RSV vs COVID	-	0.226194	0.890708	0.918309	0.29131	0.942456
GDNF	COVID vs Healthy	+	0.0085814	0.00733489	0.00539873	0.0218777	0.0241522
GDNF	RSV vs Healthy	+	0.0085814	0.108717	0.0475256	0.0218777	0.118814
GDNF	RSV vs COVID	-	0.0085814	0.25218	0.16617	0.0218777	0.306819
CDCP1	COVID vs Healthy	+	0.000420867	0.0019277	0.00110391	0.00325215	0.00879677
CDCP1	RSV vs Healthy	+	0.000420867	0.00190146	0.000957782	0.00325215	0.00842187
CDCP1	RSV vs COVID	+	0.000420867	0.854632	0.797634	0.00325215	0.87671
CD244	COVID vs Healthy	-	0.327772	0.52347	0.534931	0.386953	0.70034
CD244	RSV vs Healthy	-	0.327772	0.405876	0.143969	0.386953	0.273971
CD244	RSV vs COVID	-	0.327772	0.52347	0.441756	0.386953	0.615562
IL7	COVID vs Healthy	+	0.208211	0.397325	0.326699	0.27653	0.48435
IL7	RSV vs Healthy	+	0.208211	0.231298	0.113817	0.27653	0.230345
IL7	RSV vs COVID	+	0.208211	0.397325	0.305061	0.27653	0.461012
TNFRSF11B	COVID vs Healthy	-	0.0140856	0.975208	0.920281	0.0306994	0.942456
TNFRSF11B	RSV vs Healthy	-	0.0140856	0.0218595	0.0110209	0.0306994	0.0413285
TNFRSF11B	RSV vs COVID	-	0.0140856	0.0218595	0.011977	0.0306994	0.0436306
TGFB1	COVID vs Healthy	+	0.334895	0.991249	0.888571	0.389946	0.92863
TGFB1	RSV vs Healthy	-	0.334895	0.315885	0.253906	0.389946	0.407208
TGFB1	RSV vs COVID	-	0.334895	0.315885	0.151032	0.389946	0.285282
PLAU	COVID vs Healthy	+	0.0229025	0.144112	0.104954	0.0442435	0.217587
PLAU	RSV vs Healthy	-	0.0229025	0.144112	0.0966473	0.0442435	0.205375
PLAU	RSV vs COVID	-	0.0229025	0.0179786	0.0138343	0.0442435	0.0476721
IL6	COVID vs Healthy	+	7.50384e-07	9.79418e-06	6.68105e-06	3.18913e-05	0.000513853
IL6	RSV vs Healthy	+	7.50384e-07	2.867e-05	1.40246e-05	3.18913e-05	0.000715253
IL6	RSV vs COVID	-	7.50384e-07	0.725472	0.644412	3.18913e-05	0.765299
IL17C	COVID vs Healthy	+	0.00136522	0.00452422	0.00250763	0.00580219	0.0163961
IL17C	RSV vs Healthy	+	0.00136522	0.00452422	0.00250763	0.00580219	0.0163961
IL17C	RSV vs COVID	-	0.00136522	0.866627	0.797634	0.00580219	0.87671
CCL2	COVID vs Healthy	+	0.0751346	0.079397	0.0291283	0.122816	0.0816232
CCL2	RSV vs Healthy	+	0.0751346	0.634569	0.645252	0.122816	0.765299
CCL2	RSV vs COVID	-	0.0751346	0.158375	0.111893	0.122816	0.230102
IL17A	COVID vs Healthy	+	0.39848	0.427785	0.222095	0.445668	0.367754
IL17A	RSV vs Healthy	-	0.39848	0.898175	0.888571	0.445668	0.92863
IL17A	RSV vs COVID	-	0.39848	0.427785	0.281515	0.445668	0.432447
CXCL11	COVID vs Healthy	+	0.0429171	0.0611876	0.0213441	0.074448	0.0680342
CXCL11	RSV vs Healthy	+	0.0429171	0.0611876	0.062675	0.074448	0.142698
CXCL11	RSV vs COVID	+	0.0429171	0.902787	0.959101	0.074448	0.966683
AXIN1	COVID vs Healthy	+	0.0224236	0.0435563	0.0172233	0.0442435	0.0563069
AXIN1	RSV vs Healthy	+	0.0224236	0.043784	0.0291283	0.0442435	0.0816232
AXIN1	RSV vs COVID	-	0.0224236	0.807012	0.797634	0.0442435	0.87671
TNFSF10	COVID vs Healthy	+	8.19457e-05	8.85352e-05	4.83938e-05	0.000764974	0.00112186
TNFSF10	RSV vs Healthy	+	8.19457e-05	0.490702	0.45894	0.000764974	0.629193
TNFSF10	RSV vs COVID	-	8.19457e-05	0.00181358	0.00103055	0.000764974	0.00875966
IL20RA	COVID vs Healthy	-	0.653876	0.743494	0.45894	0.686166	0.629193
IL20RA	RSV vs Healthy	-	0.653876	0.743494	0.645252	0.686166	0.765299
IL20RA	RSV vs COVID	-	0.653876	0.743494	0.472789	0.686166	0.641283
CXCL9	COVID vs Healthy	-	0.45144	0.638483	0.703719	0.498343	0.808326
CXCL9	RSV vs Healthy	-	0.45144	0.623486	0.193244	0.498343	0.339843
CXCL9	RSV vs COVID	-	0.45144	0.638483	0.538301	0.498343	0.70034
CST5	COVID vs Healthy	+	0.274206	0.357378	0.155277	0.33779	0.291144
CST5	RSV vs Healthy	+	0.274206	0.770607	0.703719	0.33779	0.808326
CST5	RSV vs COVID	-	0.274206	0.359628	0.199825	0.33779	0.344292
OSM	COVID vs Healthy	+	0.00125994	0.00390743	0.00110391	0.00574952	0.00879677
OSM	RSV vs Healthy	+	0.00125994	0.00390743	0.00476867	0.00574952	0.02223
OSM	RSV vs COVID	-	0.00125994	0.902787	0.959101	0.00574952	0.966683
CXCL1	COVID vs Healthy	+	0.00197005	0.00252224	0.00167503	0.00750182	0.0125627
CXCL1	RSV vs Healthy	+	0.00197005	0.718063	0.616793	0.00750182	0.765299
CXCL1	RSV vs COVID	-	0.00197005	0.00857936	0.00346591	0.00750182	0.0192132
CCL4	COVID vs Healthy	+	0.490025	0.676152	0.270948	0.534001	0.421292
CCL4	RSV vs Healthy	+	0.490025	0.676152	0.645252	0.534001	0.765299
CCL4	RSV vs COVID	-	0.490025	0.676152	0.441756	0.534001	0.615562
CD6	COVID vs Healthy	-	0.00449988	0.00997668	0.00539873	0.0127497	0.0241522
CD6	RSV vs Healthy	-	0.00449988	0.0150813	0.00776478	0.0127497	0.0300003
CD6	RSV vs COVID	+	0.00449988	0.736956	0.644412	0.0127497	0.765299
KITLG	COVID vs Healthy	-	0.00372044	0.0262148	0.0138176	0.0112822	0.0476721
KITLG	RSV vs Healthy	-	0.00372044	0.00518455	0.0028601	0.0112822	0.0177884
KITLG	RSV vs COVID	-	0.00372044	0.482486	0.411924	0.0112822	0.586819
IL18	COVID vs Healthy	+	0.732917	0.938799	0.857039	0.750578	0.926038
IL18	RSV vs Healthy	-	0.732917	0.744707	0.435023	0.750578	0.612878
IL18	RSV vs COVID	-	0.732917	0.744707	0.608077	0.750578	0.765299
SLAMF1	COVID vs Healthy	-	0.087155	0.0843737	0.0432158	0.134694	0.112449
SLAMF1	RSV vs Healthy	-	0.087155	0.328506	0.207306	0.134694	0.347782
SLAMF1	RSV vs COVID	+	0.087155	0.328506	0.259233	0.134694	0.413153
TGFA	COVID vs Healthy	+	0.0591434	0.0540088	0.0191872	0.0985723	0.0619333
TGFA	RSV vs Healthy	+	0.0591434	0.28519	0.237625	0.0985723	0.384444
TGFA	RSV vs COVID	-	0.0591434	0.28519	0.305061	0.0985723	0.461012
CCL13	COVID vs Healthy	-	0.00384923	0.196196	0.307341	0.0112822	0.461012
CCL13	RSV vs Healthy	-	0.00384923	0.00258096	0.00039585	0.0112822	0.00593775
CCL13	RSV vs COVID	-	0.00384923	0.0874999	0.123936	0.0112822	0.244989
CCL11	COVID vs Healthy	-	0.0810037	0.663499	0.888571	0.127506	0.92863
CCL11	RSV vs Healthy	-	0.0810037	0.0879746	0.015438	0.127506	0.0517985
CCL11	RSV vs COVID	-	0.0810037	0.158375	0.218409	0.127506	0.364015
TNFSF14	COVID vs Healthy	+	0.0177825	0.0227597	0.00688901	0.0377879	0.0283338
TNFSF14	RSV vs Healthy	+	0.0177825	0.0690041	0.0572337	0.0377879	0.135151
TNFSF14	RSV vs COVID	-	0.0177825	0.531333	0.608077	0.0377879	0.765299
FGF23	COVID vs Healthy	+	0.00108945	0.000672725	0.00039585	0.00574952	0.00593775
FGF23	RSV vs Healthy	+	0.00108945	0.0892785	0.0748429	0.00574952	0.165956
FGF23	RSV vs COVID	-	0.00108945	0.0892785	0.0513291	0.00574952	0.125855
IL10RA	COVID vs Healthy	+	0.0279877	0.21059	0.207306	0.0528656	0.347782
IL10RA	RSV vs Healthy	+	0.0279877	0.0230714	0.00776478	0.0528656	0.0300003
IL10RA	RSV vs COVID	+	0.0279877	0.21059	0.238204	0.0528656	0.384444
FGF5	COVID vs Healthy	+	0.574132	0.568103	0.389409	0.610016	0.564201
FGF5	RSV vs Healthy	-	0.574132	0.875795	0.888571	0.610016	0.92863
FGF5	RSV vs COVID	-	0.574132	0.568103	0.355967	0.610016	0.524691
MMP1	COVID vs Healthy	-	0.296112	0.462403	0.508915	0.359565	0.675902
MMP1	RSV vs Healthy	-	0.296112	0.358028	0.113817	0.359565	0.230345
MMP1	RSV vs COVID	-	0.296112	0.462403	0.504985	0.359565	0.675902
LIFR	COVID vs Healthy	+	0.000606286	0.00131047	0.00082975	0.00426284	0.00810447
LIFR	RSV vs Healthy	-	0.000606286	0.869315	0.920281	0.00426284	0.942456
LIFR	RSV vs COVID	-	0.000606286	0.00131047	0.000858121	0.00426284	0.00810447
FGF21	COVID vs Healthy	+	0.105498	0.748338	0.645252	0.157321	0.765299
FGF21	RSV vs Healthy	+	0.105498	0.11542	0.0572337	0.157321	0.135151
FGF21	RSV vs COVID	+	0.105498	0.11542	0.0905873	0.157321	0.194116
CCL19	COVID vs Healthy	+	0.044759	0.0565946	0.0262983	0.0760904	0.0762053
CCL19	RSV vs Healthy	+	0.044759	0.82138	0.763994	0.0760904	0.858231
CCL19	RSV vs COVID	-	0.044759	0.0733396	0.0402395	0.0760904	0.106886
IL15RA	COVID vs Healthy	+	0.0207142	0.0226361	0.00370407	0.0419216	0.0192763
IL15RA	RSV vs Healthy	+	0.0207142	0.100278	0.12326	0.0419216	0.244989
IL15RA	RSV vs COVID	-	0.0207142	0.436187	0.681618	0.0419216	0.793665
IL10RB	COVID vs Healthy	+	0.125066	0.409672	0.389409	0.178422	0.564201
IL10RB	RSV vs Healthy	-	0.125066	0.266822	0.167247	0.178422	0.306819
IL10RB	RSV vs COVID	-	0.125066	0.131612	0.0577704	0.178422	0.135151
IL22RA1	COVID vs Healthy	+	0.0020299	0.00171867	0.00219532	0.00750182	0.0155502
IL22RA1	RSV vs Healthy	+	0.0020299	0.436116	0.270948	0.00750182	0.421292
IL22RA1	RSV vs COVID	-	0.0020299	0.0200777	0.00408148	0.00750182	0.0204074
IL18R1	COVID vs Healthy	+	3.62724e-06	2.02139e-06	6.68105e-06	0.000102772	0.000513853
IL18R1	RSV vs Healthy	+	3.62724e-06	0.0127154	0.00250763	0.000102772	0.0163961
IL18R1	RSV vs COVID	-	3.62724e-06	0.0301585	0.00766076	0.000102772	0.0300003
CD274	COVID vs Healthy	+	3.96536e-05	2.90677e-05	4.07327e-05	0.00042132	0.00112186
CD274	RSV vs Healthy	+	3.96536e-05	0.0134163	0.00420591	0.00042132	0.0206251
CD274	RSV vs COVID	-	3.96536e-05	0.0930667	0.0455003	0.00042132	0.116026
CXCL5	COVID vs Healthy	+	0.258456	0.727651	0.616793	0.32307	0.765299
CXCL5	RSV vs Healthy	-	0.258456	0.283528	0.143969	0.32307	0.273971
CXCL5	RSV vs COVID	-	0.258456	0.283528	0.199825	0.32307	0.344292
TNFSF11	COVID vs Healthy	-	0.361672	0.505948	0.133303	0.409895	0.259484
TNFSF11	RSV vs Healthy	-	0.361672	0.539597	0.45894	0.409895	0.629193
TNFSF11	RSV vs COVID	+	0.361672	0.66902	0.837472	0.409895	0.908746
HGF	COVID vs Healthy	-	0.992286	0.963547	0.888571	0.992286	0.92863
HGF	RSV vs Healthy	-	0.992286	0.963547	0.920281	0.992286	0.942456
HGF	RSV vs COVID	-	0.992286	0.963547	1	0.992286	1
IL12B	COVID vs Healthy	+	0.0414918	0.0458535	0.0237091	0.074448	0.0712961
IL12B	RSV vs Healthy	-	0.0414918	0.785325	0.703719	0.074448	0.808326
IL12B	RSV vs COVID	-	0.0414918	0.0458535	0.0402395	0.074448	0.106886
IL24	COVID vs Healthy	+	0.125945	0.20044	0.179897	0.178422	0.323054
IL24	RSV vs Healthy	+	0.125945	0.180992	0.0475256	0.178422	0.118814
IL24	RSV vs COVID	-	0.125945	0.725472	0.877731	0.178422	0.92863
ARTN	COVID vs Healthy	-	0.00518188	0.604273	0.616793	0.0142084	0.765299
ARTN	RSV vs Healthy	+	0.00518188	0.0107164	0.00776478	0.0142084	0.0300003
ARTN	RSV vs COVID	+	0.00518188	0.00872722	0.00346591	0.0142084	0.0192132
MMP10	COVID vs Healthy	+	1.91497e-05	0.0141516	0.00370407	0.000232532	0.0192763
MMP10	RSV vs Healthy	+	1.91497e-05	1.24845e-05	2.40665e-05	0.000232532	0.00102283
MMP10	RSV vs COVID	+	1.91497e-05	0.0625116	0.0240449	0.000232532	0.0712961
IL10	COVID vs Healthy	+	8.9997e-05	0.00102	0.000291319	0.000764974	0.00571434
IL10	RSV vs Healthy	+	8.9997e-05	0.000366487	0.00039585	0.000764974	0.00593775
IL10	RSV vs COVID	+	8.9997e-05	0.680174	0.472789	0.000764974	0.641283
TNF	COVID vs Healthy	+	0.00259389	0.00200619	0.000717751	0.00816594	0.0076261
TNF	RSV vs Healthy	+	0.00259389	0.367454	0.389409	0.00816594	0.564201
TNF	RSV vs COVID	-	0.00259389	0.0304563	0.0240449	0.00816594	0.0712961
CCL23	COVID vs Healthy	+	0.0137036	0.131355	0.0888751	0.0306529	0.192061
CCL23	RSV vs Healthy	+	0.0137036	0.012063	0.00476867	0.0306529	0.02223
CCL23	RSV vs COVID	+	0.0137036	0.278364	0.281515	0.0306529	0.432447
CD5	COVID vs Healthy	-	0.178514	0.191743	0.062675	0.24308	0.142698
CD5	RSV vs Healthy	-	0.178514	0.377746	0.411842	0.24308	0.586819
CD5	RSV vs COVID	+	0.178514	0.377746	0.411924	0.24308	0.586819
CCL3	COVID vs Healthy	+	0.0429171	0.0481728	0.015438	0.074448	0.0517985
CCL3	RSV vs Healthy	+	0.0429171	0.713285	0.763994	0.074448	0.858231
CCL3	RSV vs COVID	-	0.0429171	0.0874999	0.0726741	0.074448	0.162561
FLT3LG	COVID vs Healthy	+	0.0108846	0.0132734	0.00688901	0.0256997	0.0283338
FLT3LG	RSV vs Healthy	-	0.0108846	0.806484	0.733651	0.0256997	0.838929
FLT3LG	RSV vs COVID	-	0.0108846	0.0132734	0.0138343	0.0256997	0.0476721
CXCL6	COVID vs Healthy	-	0.180165	0.832061	0.920281	0.24308	0.942456
CXCL6	RSV vs Healthy	-	0.180165	0.226864	0.0685373	0.24308	0.154664
CXCL6	RSV vs COVID	-	0.180165	0.226864	0.199825	0.24308	0.344292
CXCL10	COVID vs Healthy	+	0.00145449	0.000904011	0.000460389	0.00588722	0.00652218
CXCL10	RSV vs Healthy	+	0.00145449	0.115489	0.104954	0.00588722	0.217587
CXCL10	RSV vs COVID	-	0.00145449	0.0874999	0.0513291	0.00588722	0.125855
EIF4EBP1	COVID vs Healthy	+	0.00222185	0.791657	0.952117	0.00786906	0.966683
EIF4EBP1	RSV vs Healthy	+	0.00222185	0.00316946	0.000619935	0.00786906	0.00718561
EIF4EBP1	RSV vs COVID	+	0.00222185	0.00780969	0.011977	0.00786906	0.0436306
IL20	COVID vs Healthy	+	0.00875108	0.0438856	0.0432158	0.0218777	0.112449
IL20	RSV vs Healthy	+	0.00875108	0.0116503	0.0028601	0.0218777	0.0177884
IL20	RSV vs COVID	+	0.00875108	0.511498	0.644412	0.0218777	0.765299
SIRT2	COVID vs Healthy	+	0.00242462	0.513405	0.534931	0.00792665	0.70034
SIRT2	RSV vs Healthy	+	0.00242462	0.00226925	0.00082975	0.00792665	0.00810447
SIRT2	RSV vs COVID	+	0.00242462	0.0176454	0.0138343	0.00792665	0.0476721
CCL28	COVID vs Healthy	+	0.566745	0.636002	0.588899	0.609789	0.76228
CCL28	RSV vs Healthy	+	0.566745	0.636002	0.307341	0.609789	0.461012
CCL28	RSV vs COVID	+	0.566745	0.636002	0.644412	0.609789	0.765299
DNER	COVID vs Healthy	-	0.0401222	0.914109	0.888571	0.0741389	0.92863
DNER	RSV vs Healthy	-	0.0401222	0.056786	0.0237091	0.0741389	0.0712961
DNER	RSV vs COVID	-	0.0401222	0.056786	0.0355039	0.0741389	0.0963137
S100A12	COVID vs Healthy	-	0.256505	0.817827	0.763994	0.32307	0.858231
S100A12	RSV vs Healthy	+	0.256505	0.315885	0.143969	0.32307	0.273971
S100A12	RSV vs COVID	+	0.256505	0.315885	0.182422	0.32307	0.325299
CD40	COVID vs Healthy	-	0.900162	0.820669	0.794703	0.910879	0.87671
CD40	RSV vs Healthy	-	0.900162	0.820669	0.825734	0.910879	0.9037
CD40	RSV vs COVID	-	0.900162	0.820669	0.681618	0.910879	0.793665
IFNG	COVID vs Healthy	+	1.35598e-05	0.027205	0.00325726	0.000192096	0.0192132
IFNG	RSV vs Healthy	+	1.35598e-05	7.23082e-06	4.83938e-05	0.000192096	0.00112186
IFNG	RSV vs COVID	+	1.35598e-05	0.029016	0.00346591	0.000192096	0.0192132
FGF19	COVID vs Healthy	-	0.31635	0.391029	0.12326	0.378729	0.244989
FGF19	RSV vs Healthy	-	0.31635	0.473017	0.508915	0.378729	0.675902
FGF19	RSV vs COVID	+	0.31635	0.473017	0.538301	0.378729	0.70034
IL4	COVID vs Healthy	+	0.351573	0.407259	0.270948	0.403834	0.421292
IL4	RSV vs Healthy	+	0.351573	0.407259	0.207306	0.403834	0.347782
IL4	RSV vs COVID	+	0.351573	0.84267	0.837472	0.403834	0.908746
LIF	COVID vs Healthy	+	0.000965587	0.00328721	0.00219532	0.00547166	0.0155502
LIF	RSV vs Healthy	+	0.000965587	0.00328721	0.00167503	0.00547166	0.0125627
LIF	RSV vs COVID	-	0.000965587	0.890708	0.797634	0.00547166	0.87671
NRTN	COVID vs Healthy	+	0.130563	0.755267	0.616758	0.181932	0.765299
NRTN	RSV vs Healthy	+	0.130563	0.156923	0.0888751	0.181932	0.192061
NRTN	RSV vs COVID	-	0.130563	0.195973	0.0811786	0.181932	0.178453
CCL8	COVID vs Healthy	+	6.73994e-06	4.29183e-06	8.06044e-06	0.000143224	0.000513853
CCL8	RSV vs Healthy	+	6.73994e-06	0.182636	0.104954	0.000143224	0.217587
CCL8	RSV vs COVID	-	6.73994e-06	0.00181358	0.000331003	0.000143224	0.00593775
CASP8	COVID vs Healthy	+	0.000756386	0.252084	0.167247	0.00459234	0.306819
CASP8	RSV vs Healthy	+	0.000756386	0.000507078	0.000534643	0.00459234	0.00681669
CASP8	RSV vs COVID	+	0.000756386	0.0228017	0.0065688	0.00459234	0.0279174
CCL25	COVID vs Healthy	-	0.0202157	0.909759	0.952117	0.0419106	0.966683
CCL25	RSV vs Healthy	-	0.0202157	0.029531	0.00610302	0.0419106	0.0263774
CCL25	RSV vs COVID	-	0.0202157	0.0330195	0.0455003	0.0419106	0.116026
CX3CL1	COVID vs Healthy	+	0.00128519	0.000860385	0.000534643	0.00574952	0.00681669
CX3CL1	RSV vs Healthy	+	0.00128519	0.246451	0.207306	0.00574952	0.347782
CX3CL1	RSV vs COVID	-	0.00128519	0.0330195	0.0159413	0.00574952	0.0527927
TNFRSF9	COVID vs Healthy	-	0.0769304	0.0887925	0.0237091	0.123379	0.0712961
TNFRSF9	RSV vs Healthy	-	0.0769304	0.206548	0.179897	0.123379	0.323054
TNFRSF9	RSV vs COVID	+	0.0769304	0.521367	0.644412	0.123379	0.765299
NTF3	COVID vs Healthy	-	0.00126775	0.0971162	0.062675	0.00574952	0.142698
NTF3	RSV vs Healthy	-	0.00126775	0.000787347	0.000717751	0.00574952	0.0076261
NTF3	RSV vs COVID	-	0.00126775	0.0970377	0.0355039	0.00574952	0.0963137
TNFSF12	COVID vs Healthy	-	0.000651964	0.00330735	0.00325726	0.00426284	0.0192132
TNFSF12	RSV vs Healthy	-	0.000651964	0.00222453	0.000619935	0.00426284	0.00718561
TNFSF12	RSV vs COVID	-	0.000651964	0.771751	0.877731	0.00426284	0.92863
CCL20	COVID vs Healthy	+	0.00833205	0.0580196	0.0322165	0.0218777	0.0892957
CCL20	RSV vs Healthy	-	0.00833205	0.221331	0.193244	0.0218777	0.339843
CCL20	RSV vs COVID	-	0.00833205	0.00678512	0.00408148	0.0218777	0.0204074
SULT1A1	COVID vs Healthy	+	0.0113969	0.024696	0.0262983	0.0261821	0.0762053
SULT1A1	RSV vs Healthy	+	0.0113969	0.024696	0.00610302	0.0261821	0.0263774
SULT1A1	RSV vs COVID	+	0.0113969	0.830745	1	0.0261821	1
STAMBP	COVID vs Healthy	+	0.00239665	0.600453	0.616793	0.00792665	0.765299
STAMBP	RSV vs Healthy	+	0.00239665	0.00253889	0.000957782	0.00792665	0.00842187
STAMBP	RSV vs COVID	+	0.00239665	0.0135511	0.0103443	0.00792665	0.0393701
IL5	COVID vs Healthy	-	0.220876	0.50929	0.645252	0.288838	0.765299
IL5	RSV vs Healthy	+	0.220876	0.355345	0.326699	0.288838	0.48435
IL5	RSV vs COVID	+	0.220876	0.261812	0.0577704	0.288838	0.135151
ADA	COVID vs Healthy	+	0.0090104	0.508118	0.483577	0.0218824	0.652445
ADA	RSV vs Healthy	+	0.0090104	0.00815061	0.00370407	0.0218824	0.0192763
ADA	RSV vs COVID	+	0.0090104	0.0452378	0.0274451	0.0218824	0.0786348
LTA	COVID vs Healthy	-	0.0904435	0.100035	0.0237091	0.13728	0.0712961
LTA	RSV vs Healthy	-	0.0904435	0.255528	0.237625	0.13728	0.384444
LTA	RSV vs COVID	+	0.0904435	0.482486	0.644412	0.13728	0.765299
CSF1	COVID vs Healthy	+	1.59767e-07	1.53051e-07	3.76954e-06	1.35802e-05	0.000513853
CSF1	RSV vs Healthy	+	1.59767e-07	0.000871029	2.87247e-05	1.35802e-05	0.0010464
CSF1	RSV vs COVID	-	1.59767e-07	0.0625116	0.0047947	1.35802e-05	0.02223
