# Supplementary material for: Infants display reduced NK cell responses in RSV and increased inflammatory responses in SARS-CoV-2 infections
Source: Research Square preprint supplement (doi:10.21203/rs.3.rs-5640872/v1), 2025-01-13
Supplement: Supplementary file 8 [file c1269d6193894414ce1df14e.xlsx]

## Sheet: Index
Sheet Name	Description
Clinical Group Legend	Legend of clinical group labels used in this table
scRNA Summary	Summary of the number of cells after each QC step and cell type annotation for each sample in scRNA-seq data
snATAC Summary	Summary of the number of cells after each QC step and cell type annotation for each sample in snATAC-seq data
Combined Comparisons	Statistics for comparing Healthy, COVID-19 (Moderate + Severe), and RSV (Mild + Moderate + Severe) for each annotated cell type from scRNA-seq
Healthy Control Comparisons	Statistics for all healthy control comparisons between each clinical condition for each annotated cell type from scRNA-seq
All Comparisons	Statistics for all pairwise comparisons between each condition for each annotated cell type from scRNA-seq

## Sheet: Clinical Group Legend
Clinical Group	Description
COVID G1	Subacute COVID-19
COVID G2	Moderate COVID-19
COVID G3	Severe COVID-19
COVID G3_S	Severe T COVID-19 (Steroid Treated)
RSV G1	Mild RSV
RSV G2	Moderate RSV
RSV G3	Severe RSV
COVID	Combined sample group: Moderate+Severe COVID-19 (No Steroid Treatment)
RSV	Combined sample group: Mild+Moderate+Severe RSV

## Sheet: scRNA-seq Summary
Sample ID	Included In Study	Clinical Group	Clinical Group Full Description	# Cells from CellRanger	# Cells after Scrublet	# Cells after QC	# Cells after Pass 1	# Cells after Pass 2	% Remaining	ISGhi CD14+ Monocyte	ISGlo CD14+ Monocyte	ISGhi CD16+ Monocyte	ISGlo CD16+ Monocyte	ISGhi CD163+ Monocyte	pDC	Mo-DC	cDC1	cDC2	AXL+ SIGLEC6+ DC	CD56dim NK	CD56bright NK	Proliferating NK	ISGhi Naive CD8+ T	ISGlo Naive CD8+ T	GZMKhi CD8+ T	CD8+ TEMRA	MAIT	CD8- γδ T	CD8+ γδ T	Proliferating T	ISGhi Naive CD4+ T	ISGlo Naive CD4+ T	CD4+ TCM	CD4+ TEMRA	ISGhi Tfh	ISGlo Tfh	Th1	Th2	Th17	Th22	ISGhi Naive Treg	ISGlo Naive Treg	Memory Treg	ISGhi Naive B	ISGlo Naive B	FKBP5hi B	ISGhi TrB	ISGlo TrB	Memory B
pHC1	Yes	Healthy	Healthy	6716	6710	5046	4940	4898	72.9303	0	76	3	35	0	10	11	0	0	1	226	44	3	8	802	14	0	8	55	22	0	87	2665	27	0	0	36	2	1	1	3	0	157	12	2	307	2	1	183	77
pHC2	Yes	Healthy	Healthy	10004	9645	7385	7321	7213	72.1012	37	275	26	154	0	8	2	0	0	0	646	91	53	51	818	95	72	67	58	30	46	428	2761	140	6	16	94	27	6	29	24	3	238	18	8	466	2	14	306	49
pHC3	Yes	Healthy	Healthy	7709	7522	6084	6010	5968	77.416	14	171	6	28	0	21	12	1	0	0	229	69	6	5	717	102	117	39	26	59	6	108	2649	158	1	8	130	5	6	7	0	3	132	17	10	874	1	2	107	82
pHC4	Yes	Healthy	Healthy	13293	13290	8261	8131	8028	60.3927	2	111	0	98	3	12	9	0	0	0	204	37	6	10	1320	81	132	31	32	13	10	86	4788	116	1	1	74	7	1	2	4	1	231	10	2	356	1	0	96	87
pHC5	Yes	Healthy	Healthy	5041	5014	4119	4071	4036	80.0635	3	132	1	39	0	10	6	1	0	1	163	16	0	4	855	10	0	4	58	25	0	30	2218	48	0	1	20	5	0	0	2	0	86	5	1	166	0	2	66	46
pHC6	Yes	Healthy	Healthy	4398	4357	3950	3896	3860	87.7672	1	34	0	50	0	19	6	0	2	2	183	34	0	2	257	14	16	16	31	2	0	55	2528	19	0	1	13	2	0	1	0	1	146	2	0	167	37	0	168	24
pHC7	Yes	Healthy	Healthy	5429	5409	3915	3825	3776	69.5524	48	258	22	154	0	18	14	0	0	0	271	21	12	14	377	4	0	14	61	3	4	184	1729	33	0	1	38	0	2	3	4	2	54	9	5	208	1	2	105	66
pHC8	Yes	Healthy	Healthy	6974	6849	6537	6470	6383	91.5257	16	318	10	157	2	18	5	2	15	0	498	60	21	3	581	32	0	126	21	25	3	31	3601	81	1	1	68	5	1	10	10	1	160	20	1	269	1	0	105	59
pHC9	Yes	Healthy	Healthy	5912	5839	4056	4018	3976	67.253	0	48	0	21	0	5	0	1	1	0	176	58	5	4	524	26	0	11	35	5	3	8	2089	86	0	0	54	1	1	1	1	1	98	3	1	473	0	1	134	76
pHC10	Yes	Healthy	Healthy	7358	7127	6437	6355	6303	85.6619	17	396	4	98	0	23	8	5	13	1	343	86	8	3	906	51	9	30	64	50	3	8	2538	142	1	2	109	7	1	10	4	0	127	7	1	813	7	0	175	137
pHC11	Yes	Healthy	Healthy	10605	10258	9055	8873	8796	82.942	8	427	0	119	0	43	14	0	18	2	509	100	13	45	1586	41	5	33	37	29	4	79	2519	71	0	1	50	3	8	5	3	0	243	7	5	1781	8	1	568	329
pHC12	Yes	Healthy	Healthy	9204	8953	7652	7463	7394	80.3346	6	429	4	123	2	31	18	2	27	3	380	21	10	3	895	13	0	10	111	10	3	29	3409	78	1	3	44	1	1	1	4	0	182	3	3	874	6	1	444	164
pHC13	Yes	Healthy	Healthy	10437	10085	8803	8544	8476	81.2111	34	1038	10	261	1	33	12	2	24	2	346	104	28	4	1071	25	5	18	55	28	8	9	3492	77	0	1	65	2	3	5	6	0	150	6	3	871	0	1	419	135
pHC14	Yes	Healthy	Healthy	8576	8368	7577	7526	7466	87.0569	24	697	4	173	0	9	3	4	14	2	224	79	14	9	746	50	5	50	34	14	14	22	3707	77	2	1	87	3	4	15	3	0	217	14	0	665	0	0	181	221
pHC15	Yes	Healthy	Healthy	8296	8141	6903	6849	6789	81.8346	4	172	2	178	0	13	1	0	33	0	190	84	5	2	829	164	24	84	36	51	10	16	2909	232	0	2	195	23	19	19	22	0	288	21	0	760	0	1	111	224
pHC16	Yes	Healthy	Healthy	6999	6865	6183	6117	6069	86.7124	1	115	2	43	0	2	3	0	5	0	305	52	5	3	803	67	27	12	32	15	0	27	2997	124	1	0	85	7	2	2	4	0	212	8	1	937	1	0	86	66
pHC17	Yes	Healthy	Healthy	8062	7858	6732	6653	6606	81.94	15	476	2	114	0	24	7	1	25	1	301	30	7	8	616	100	95	169	26	37	13	36	3034	106	0	1	93	9	6	5	5	0	218	3	0	622	0	3	189	183
pCoV4	Yes	COVID G1	Subacute COVID-19	7402	7109	5286	5149	5097	68.8598	5	196	6	30	0	3	3	0	0	0	246	70	13	6	912	40	1	42	46	53	2	20	1775	56	1	0	62	6	3	1	5	0	172	8	1	739	0	0	345	150
pCoV10	Yes	COVID G1	Subacute COVID-19	6599	6446	4521	4393	4334	65.6766	33	165	16	101	0	24	10	1	10	0	269	79	18	3	199	23	4	48	34	30	3	47	2091	82	0	2	72	11	15	6	12	0	145	9	2	498	0	1	175	60
pCoV13	Yes	COVID G1	Subacute COVID-19	6444	6259	5688	5629	5575	86.5146	3	428	1	70	0	27	24	0	21	2	176	47	2	2	839	186	105	215	83	35	9	6	1739	179	0	1	208	22	8	18	15	2	230	17	1	552	0	0	79	93
pCoV14	Yes	COVID G1	Subacute COVID-19	6556	6365	5748	5647	5606	85.5095	7	307	1	32	0	17	8	10	18	1	138	51	3	1	510	56	12	111	37	91	3	4	1649	140	1	0	125	19	16	16	16	0	100	13	0	1272	1	0	232	389
pCoV15	Yes	COVID G1	Subacute COVID-19	9456	9209	7433	7246	7167	75.7931	188	1278	14	88	3	4	12	0	4	0	311	54	11	6	404	6	12	14	10	4	7	160	2777	28	1	2	36	2	0	3	7	4	243	18	12	602	5	9	362	379
pCoV16	Yes	COVID G1	Subacute COVID-19	6447	6327	5547	5479	5453	84.582	2	1011	1	114	5	9	16	4	22	0	74	60	3	2	626	33	0	54	104	61	1	7	1585	185	2	1	118	9	6	12	9	0	109	7	1	925	1	0	148	81
pCoV18	Yes	COVID G1	Subacute COVID-19	7725	7639	6678	6584	6551	84.8026	8	322	2	74	0	13	22	3	20	1	90	30	8	35	805	92	22	18	83	46	6	284	3057	227	3	6	132	8	6	11	10	8	255	8	4	531	1	1	39	111
pCoV19	Yes	COVID G1	Subacute COVID-19	14008	14004	7018	6240	6142	43.8464	12	620	0	48	2	9	15	1	6	0	316	32	7	21	1121	21	26	55	75	47	2	59	2312	57	2	0	32	10	0	1	2	1	123	2	14	467	7	1	457	121
pCoV25	Yes	COVID G1	Subacute COVID-19	10788	10399	9161	8989	8926	82.7401	219	467	107	86	0	11	6	0	0	0	334	244	61	55	833	24	5	20	35	15	12	392	3370	156	2	10	77	7	2	13	2	7	185	9	13	901	0	27	914	195
pCoV3	Yes	COVID G2	Moderate COVID-19	5427	5259	4946	4881	4857	89.497	401	58	61	1	1	5	0	0	0	0	197	33	9	116	332	25	0	5	24	9	2	680	1142	124	2	33	39	4	9	2	3	26	85	5	70	781	5	60	402	77
pCoV5	Yes	COVID G2	Moderate COVID-19	6827	6674	6147	6032	5845	85.6159	54	583	57	93	6	6	10	0	0	0	290	83	92	3	519	20	2	21	34	25	13	55	3135	12	0	0	26	3	1	0	0	1	208	13	0	172	2	0	119	64
pCoV6	Yes	COVID G2	Moderate COVID-19	9413	9409	8975	8894	8847	93.987	2	9	5	3	0	7	3	0	1	0	109	43	27	62	1297	23	1	30	33	7	2	738	5541	170	0	6	60	0	1	1	0	18	256	4	2	181	0	1	106	18
pCoV8	Yes	COVID G2	Moderate COVID-19	6854	6841	6330	6236	6163	89.9183	4	52	3	11	0	1	0	0	3	0	218	70	27	9	778	34	0	44	41	17	3	108	3809	59	0	1	57	8	0	0	1	3	267	11	1	178	2	2	218	40
pCoV9	Yes	COVID G2	Moderate COVID-19	5732	5576	5169	5073	5017	87.5262	20	48	32	15	0	12	3	0	0	1	479	12	41	46	394	29	120	18	17	4	28	748	2039	162	1	20	36	1	1	3	1	12	101	7	15	289	2	14	172	46
pCoV12	Yes	COVID G2	Moderate COVID-19	7806	7735	6309	6080	6044	77.4276	2	3	8	2	0	4	1	0	0	0	242	41	62	36	619	19	1	42	22	4	4	656	3795	56	0	7	15	2	0	0	3	11	187	5	0	28	1	7	49	9
pCoV20	Yes	COVID G2	Moderate COVID-19	8842	8619	7208	7070	6999	79.1563	969	115	1489	75	1	2	1	0	0	0	227	19	28	174	77	15	17	67	16	8	14	2116	167	23	1	75	17	3	0	1	3	74	23	21	160	69	1	655	149	55
pCoV22	Yes	COVID G2	Moderate COVID-19	10750	10745	6651	4818	4707	43.786	171	273	340	113	0	15	4	5	22	0	118	36	80	63	422	30	11	19	21	28	25	290	1274	38	1	11	38	11	3	2	2	2	51	4	36	353	4	29	485	88
pCoV23	Yes	COVID G2	Moderate COVID-19	9367	9060	8103	7610	7534	80.4313	529	44	347	9	1	12	5	0	2	0	186	81	25	345	442	28	16	37	50	13	11	2435	1312	66	0	50	16	9	0	0	3	39	96	8	269	560	5	102	248	98
pCoV24	Yes	COVID G2	Moderate COVID-19	4960	4864	4010	3764	3710	74.7984	343	40	505	15	0	13	0	0	0	0	180	118	32	68	71	9	5	25	15	6	8	792	343	14	0	41	14	2	13	0	3	14	27	7	116	209	4	256	260	106
pCoV26	Yes	COVID G2	Moderate COVID-19	8544	8362	7551	7372	7288	85.2996	420	51	224	4	0	36	0	0	0	1	453	51	95	271	256	12	6	52	34	2	10	2911	1204	40	2	97	22	7	1	4	5	116	213	23	50	174	2	157	197	32
pCoV28	Yes	COVID G2	Moderate COVID-19	8403	8390	5821	5705	5669	67.464	502	108	96	6	0	12	6	0	4	1	98	23	4	175	523	41	14	55	13	20	12	1413	1457	82	6	39	11	3	2	6	3	30	108	5	63	428	1	27	96	88
pCoV2	Yes	COVID G3	Severe COVID-19	3191	3173	2841	2777	2745	86.0232	300	29	40	2	3	5	2	0	0	0	90	21	7	133	239	5	0	22	4	3	0	1077	488	8	1	15	32	0	0	3	4	43	60	13	1	29	2	6	15	15
pCoV7	Yes	COVID G3	Severe COVID-19	5781	5551	4833	4640	4606	79.6748	396	36	74	0	1	15	4	0	0	0	333	32	21	171	437	52	560	21	24	14	6	882	736	41	3	47	21	7	2	4	4	29	62	11	61	296	4	63	64	30
pCoV11	Yes	COVID G3	Severe COVID-19	3637	3491	2319	2162	2135	58.7022	109	4	133	0	2	3	0	0	0	0	53	24	74	176	69	3	0	0	21	23	1	933	206	1	0	7	0	0	0	0	0	7	8	6	55	60	0	40	42	33
pCoV29	Yes	COVID G3	Severe COVID-19	7102	6824	3683	3604	3558	50.0986	16	518	2	36	0	0	0	1	0	0	255	28	15	0	196	15	1	17	34	16	14	37	1204	22	0	0	18	0	1	5	3	0	71	10	2	415	0	1	475	97
pCoV30	Yes	COVID G3	Severe COVID-19	6271	6148	5412	5304	5207	83.033	6	193	14	60	0	9	11	1	5	0	416	105	40	10	821	48	6	13	16	10	10	176	2107	83	1	1	64	6	2	1	2	4	196	8	2	370	10	8	269	76
pCoV17	Yes	COVID G3_S	Severe Steroid COVID-19	4275	4222	2773	2605	2510	58.7135	5	2	10	7	301	6	0	0	0	0	188	79	45	11	298	12	0	1	15	16	8	53	652	2	0	0	9	0	0	0	2	0	23	75	0	74	296	22	224	17
pCoV21	Yes	COVID G3_S	Severe Steroid COVID-19	6761	6588	5616	5441	5371	79.4409	5	8	4	0	1204	1	0	0	0	0	221	46	8	5	738	30	2	24	1	5	16	14	1380	32	1	9	65	6	0	1	15	0	73	126	3	378	782	2	56	86
pCoV27	Yes	COVID G3_S	Severe Steroid COVID-19	4234	4170	3573	3485	3451	81.5068	112	106	4	1	2006	0	0	0	1	0	116	2	2	19	66	9	129	30	0	1	15	64	62	30	1	12	10	0	0	0	0	4	11	4	47	136	364	1	8	39
pCoV31	Yes	COVID G3_S	Severe Steroid COVID-19	5771	5697	4939	4833	4777	82.7759	1	15	0	4	212	0	34	1	12	0	110	131	5	15	834	121	28	15	7	31	11	83	1692	217	2	14	174	24	19	31	12	2	171	47	1	471	113	0	14	76
pRSV7	Yes	RSV G1	Mild RSV	6789	6622	5648	5521	5505	81.0871	31	0	12	0	0	4	1	1	0	0	51	16	18	491	294	92	158	15	35	16	14	2603	583	74	3	140	12	1	1	2	2	112	99	17	258	114	1	108	15	35
pRSV8	Yes	RSV G1	Mild RSV	8241	7918	7006	6961	6889	83.5942	99	271	101	76	2	13	1	0	1	0	449	25	45	22	442	49	345	53	41	25	27	168	1912	94	7	17	96	18	3	7	13	6	72	32	55	1116	9	32	799	233
pRSV9	Yes	RSV G1	Mild RSV	6978	6925	5485	5217	5157	73.9037	7	72	7	25	0	5	1	0	5	1	429	34	36	17	435	47	1	0	12	4	18	210	3093	76	2	2	29	2	5	0	2	4	86	6	1	144	0	1	246	40
pRSV12	Yes	RSV G1	Mild RSV	7327	7165	6158	6084	5997	81.848	111	567	103	213	9	23	8	0	7	0	381	48	21	5	384	37	2	51	37	32	43	121	2090	70	4	5	60	11	8	10	9	3	134	26	17	554	2	17	579	114
pRSV13	Yes	RSV G1	Mild RSV	8480	8206	5838	5742	5691	67.1108	127	475	114	59	1	19	5	0	3	0	326	34	30	68	415	25	274	11	36	27	38	460	1137	35	2	14	27	2	1	4	5	3	59	14	69	867	3	82	563	197
pRSV3	Yes	RSV G2	Moderate RSV	6694	6472	4770	4668	4590	68.5689	374	75	64	0	11	15	3	0	0	0	417	51	3	103	289	68	270	29	57	29	10	770	605	104	3	70	27	6	11	1	6	26	92	4	210	522	11	34	88	90
pRSV4	Yes	RSV G2	Moderate RSV	6546	6384	4123	4030	3967	60.6019	33	604	16	49	5	7	6	2	2	0	223	33	8	4	445	19	2	49	35	27	26	41	1430	64	2	5	56	4	0	7	5	1	64	15	0	282	0	0	299	59
pRSV5	Yes	RSV G2	Moderate RSV	7381	7147	6279	6201	6139	83.173	345	60	413	12	1	3	0	0	0	0	277	19	102	104	543	25	0	35	40	17	19	967	1942	28	2	17	31	5	1	4	4	13	137	24	90	208	2	208	271	85
pRSV6	Yes	RSV G2	Moderate RSV	7849	7606	6471	6394	6356	80.9785	656	424	210	33	4	24	15	0	0	0	192	30	19	65	666	95	2	7	8	3	109	445	2182	146	6	20	79	5	11	4	7	17	119	21	39	312	4	37	188	92
pRSV10	Yes	RSV G2	Moderate RSV	7536	7348	6349	6257	6201	82.285	678	622	272	111	0	12	5	0	17	0	416	70	5	51	512	16	18	46	30	7	7	346	1623	77	0	15	52	3	0	6	6	11	135	27	18	341	2	42	431	119
pRSV11	Yes	RSV G2	Moderate RSV	4608	4535	4029	3948	3928	85.2431	545	152	158	7	5	5	3	0	0	0	102	17	2	147	264	22	4	17	21	19	1	834	457	59	2	28	17	3	2	3	3	18	52	5	165	492	19	66	64	109
pRSV18	Yes	RSV G2	Moderate RSV	7066	6876	5901	5795	5705	80.7387	84	977	60	78	2	20	3	0	1	1	445	22	12	29	598	26	0	12	42	14	15	262	2020	92	3	17	67	7	5	7	7	1	77	22	18	461	10	4	115	41
pRSV1	Yes	RSV G3	Severe RSV	5194	5030	2468	2385	2357	45.3793	444	216	115	18	0	2	1	0	0	0	38	30	9	15	109	8	0	3	26	7	5	177	591	23	4	5	13	2	0	4	1	3	28	9	6	161	1	44	173	37
pRSV2	Yes	RSV G3	Severe RSV	4295	4247	2000	1812	1793	41.7462	314	0	76	0	0	2	0	0	0	0	37	7	4	62	11	2	0	3	3	1	6	920	34	5	0	12	2	0	0	0	0	17	7	4	14	3	0	201	13	5
pRSV14	Yes	RSV G3	Severe RSV	6332	6230	5408	5299	5240	82.7543	70	91	50	14	0	4	0	0	4	0	210	16	18	107	651	24	0	3	26	7	4	821	2066	41	1	15	15	4	2	1	3	18	110	15	29	349	4	56	316	57
pRSV15	Yes	RSV G3	Severe RSV	5035	5022	4289	4163	4101	81.4499	43	45	25	4	1	6	0	1	2	0	118	37	7	195	495	32	60	20	26	11	12	990	1236	86	2	27	27	7	2	2	6	21	70	6	41	180	1	70	124	44
pRSV16	Yes	RSV G3	Severe RSV	6025	5801	4402	4206	4177	69.3278	24	202	8	43	1	2	0	0	5	0	129	17	3	28	530	28	1	2	29	8	4	304	1957	147	4	15	43	2	3	2	7	5	127	11	17	248	5	9	131	53
pRSV17	Yes	RSV G3	Severe RSV	8375	8205	7118	6994	6910	82.5075	5	531	0	35	0	11	3	0	7	0	166	50	7	8	1292	77	7	47	97	45	24	32	3114	131	2	0	84	11	3	12	8	0	150	23	3	544	4	0	276	61
pRSV19	Yes	RSV G3	Severe RSV	7204	7130	5696	5553	5500	76.3465	22	84	73	50	2	13	3	0	9	1	167	28	17	114	642	51	2	36	27	17	29	1015	2075	198	5	34	93	7	3	10	8	24	173	17	19	207	2	12	97	65
pOI1	No	Other Infection	Other Infection	7013	6755	6256	6181	6148	87.6658	304	119	112	14	3	13	7	2	4	2	275	34	34	33	795	15	16	21	35	21	3	123	1549	91	0	4	64	4	0	8	9	6	103	11	25	1306	8	54	656	134
pCoV1	No	COVID G1	Subacute COVID-19 (other viral infections)	5723	5566	4550	4476	4423	77.2846	222	0	123	1	0	4	0	0	0	0	62	32	10	300	120	37	345	24	75	51	12	1454	454	89	0	72	17	4	7	7	5	48	31	12	186	265	0	174	55	34
[truncated: 8 more columns]

## Sheet: snATAC-seq Summary
Sample ID	Included In Study	Clinical Group	Clinical Group Full Description	# Cells from CellRanger	# Cells after QC	# Cells after AMULET/Pass 1	% Remaining	CD14+ Monocyte	CD16+ Monocyte	pDC	DC	AXL+ SIGLEC6+ DC	CD56dim NK	CD56bright NK	Naive CD8+ T	GZMKhi CD8+ T	CD8+ TEMRA	MAIT	CD8- γδ T	CD8+ γδ T	Naive CD4+ T	CD4+ TCM	Tfh	Naive Treg	Memory Treg	Naive B	TrB	Memory B	AIM2hi Memory B	DN2 B	Plasmablast	HSPC/MGK	ILC2	Other
pHC8	Yes	Healthy	Healthy	6685	6437	5645	0.844428	435	190	20	19	0	525	40	486	11	8	127	18	20	2977	102	26	128	48	336	102	0	3	2	2	7	4	9
pHC9	Yes	Healthy	Healthy	5200	4810	4232	0.813846	30	6	1	2	1	182	57	568	18	0	7	53	6	2325	123	9	91	12	539	156	25	3	3	7	3	1	4
pHC10	Yes	Healthy	Healthy	7347	6981	6216	0.84606	404	91	27	27	0	409	84	899	43	9	35	53	38	2588	159	32	118	30	741	131	78	52	18	102	9	7	32
pHC11	Yes	Healthy	Healthy	6079	3881	3324	0.5468	109	24	8	2	0	211	34	607	7	3	11	16	17	1004	35	7	81	18	798	301	18	2	2	2	4	1	2
pHC12	Yes	Healthy	Healthy	5030	4041	3622	0.72008	134	43	9	10	0	225	10	414	4	2	8	44	12	1825	62	9	100	5	411	263	15	4	0	1	7	0	5
pHC13	Yes	Healthy	Healthy	7532	6884	6163	0.818242	738	210	24	12	0	335	58	778	10	3	14	26	17	2621	72	7	104	14	606	416	25	12	12	11	21	4	13
pHC14	Yes	Healthy	Healthy	8494	6567	5939	0.699199	530	128	12	12	2	229	71	623	24	5	58	18	8	3025	118	6	130	31	603	149	72	18	4	36	23	0	4
pHC15	Yes	Healthy	Healthy	6334	5315	4869	0.768709	105	126	11	14	2	174	44	582	91	19	66	20	37	2307	248	37	194	49	477	120	63	47	2	25	3	1	5
pHC16	Yes	Healthy	Healthy	7554	6786	6132	0.811755	148	35	7	13	1	348	55	785	53	47	12	17	12	2987	150	13	221	33	940	172	26	27	3	19	2	5	1
pHC17	Yes	Healthy	Healthy	5165	4832	4339	0.840077	356	52	14	8	0	218	26	406	58	84	143	22	33	1993	133	17	158	32	371	114	76	10	2	4	4	1	4
pCoV10	Yes	COVID G1	Subacute COVID-19	4917	3959	3632	0.738662	214	98	11	10	0	293	77	171	23	14	42	19	47	1679	75	32	112	21	474	154	21	13	2	12	2	5	11
pCoV13	Yes	COVID G1	Subacute COVID-19	5961	5727	5180	0.868982	404	66	26	20	1	169	37	758	137	138	205	69	72	1760	218	59	170	28	502	60	58	47	19	61	4	4	88
pCoV14	Yes	COVID G1	Subacute COVID-19	5557	5224	4665	0.839482	310	42	20	31	0	154	37	401	56	28	85	24	90	1350	152	87	90	36	1076	142	230	137	25	28	1	3	30
pCoV15	Yes	COVID G1	Subacute COVID-19	7510	5111	4504	0.599734	805	67	3	8	0	208	34	234	3	0	11	8	7	2133	36	4	114	28	492	282	11	0	1	1	6	2	6
pCoV16	Yes	COVID G1	Subacute COVID-19	6310	2372	2096	0.332171	312	16	3	25	0	47	23	233	3	23	19	21	9	786	50	1	21	5	426	46	7	8	4	5	2	0	1
pCoV18	Yes	COVID G1	Subacute COVID-19	6873	2893	2631	0.382802	30	13	2	10	0	75	31	265	20	4	10	10	16	1648	73	12	74	4	255	18	19	39	0	1	0	2	0
pCoV19	Yes	COVID G1	Subacute COVID-19	7175	4066	3460	0.48223	154	18	3	2	0	222	23	586	6	7	24	31	40	1624	28	11	77	22	294	278	0	1	2	0	2	2	3
pCoV25	Yes	COVID G1	Subacute COVID-19	11265	10171	9154	0.812605	759	213	12	8	0	451	245	939	33	4	21	33	23	4099	177	16	159	39	897	905	45	13	4	35	10	1	13
pCoV3	Yes	COVID G2	Moderate COVID-19	5373	4966	4352	0.809976	497	82	6	2	0	191	27	356	14	0	14	19	7	1512	100	16	70	19	929	438	15	14	8	8	3	1	4
pCoV5	Yes	COVID G2	Moderate COVID-19	6688	6333	5374	0.803529	675	297	10	12	0	387	84	424	21	13	46	28	35	2652	40	3	191	31	257	117	8	2	1	8	2	1	29
pCoV8	Yes	COVID G2	Moderate COVID-19	4171	4066	3213	0.770319	50	19	0	2	0	168	39	391	12	1	27	27	13	1931	72	3	140	14	162	123	2	3	0	5	9	0	0
pCoV20	Yes	COVID G2	Moderate COVID-19	8309	3142	2757	0.331809	534	411	4	2	0	91	5	98	3	4	26	2	7	1004	43	4	42	8	203	221	2	3	5	4	27	0	4
pCoV22	Yes	COVID G2	Moderate COVID-19	5041	4204	3720	0.737949	281	290	10	6	0	167	22	404	22	14	16	11	29	1486	39	14	48	19	341	476	6	1	2	6	4	1	5
pCoV23	Yes	COVID G2	Moderate COVID-19	5457	4763	4307	0.789261	267	185	2	5	0	134	34	436	6	5	27	38	25	2281	71	8	78	19	471	184	3	4	0	2	4	1	17
pCoV24	Yes	COVID G2	Moderate COVID-19	5863	4983	4473	0.76292	399	554	12	7	0	273	114	189	7	4	29	12	10	1511	88	45	40	21	475	632	19	4	0	3	10	0	15
pCoV26	Yes	COVID G2	Moderate COVID-19	6870	5540	5074	0.738574	217	78	15	3	0	424	48	328	12	4	36	17	4	2969	99	17	239	63	191	275	1	0	0	11	13	0	10
pCoV2	Yes	COVID G3	Severe COVID-19	5512	4714	4125	0.748367	627	78	5	2	0	201	30	513	8	3	42	8	0	2229	90	17	75	26	65	48	9	5	1	25	10	0	8
pCoV7	Yes	COVID G3	Severe COVID-19	5360	4805	4147	0.773694	632	107	26	8	2	339	24	518	64	496	23	16	16	1193	71	14	40	20	371	96	17	11	10	22	7	0	4
pCoV29	Yes	COVID G3	Severe COVID-19	7124	6175	5571	0.782004	825	66	3	6	2	497	42	314	40	7	40	66	27	1939	63	11	94	29	676	755	10	7	10	11	22	0	9
pCoV30	Yes	COVID G3	Severe COVID-19	6097	5757	4454	0.730523	206	53	11	11	0	514	90	817	60	17	18	15	16	1609	129	7	173	40	378	260	6	3	2	12	3	1	3
pCoV17	Yes	COVID G3_S	Severe Steroid COVID-19	4556	1122	1051	0.230685	25	1	1	1	0	99	37	185	1	1	1	0	9	366	5	0	3	21	223	61	0	0	1	0	7	2	1
pCoV21	Yes	COVID G3_S	Severe Steroid COVID-19	7176	5348	4926	0.686455	791	2	0	0	0	271	30	711	30	17	37	0	8	1392	102	1	34	124	1277	61	6	8	0	19	5	0	0
pCoV27	Yes	COVID G3_S	Severe Steroid COVID-19	3972	1307	1238	0.311682	456	0	0	0	0	105	0	56	6	139	4	0	1	72	11	0	7	2	362	4	0	9	1	3	0	0	0
pCoV31	Yes	COVID G3_S	Severe Steroid COVID-19	6271	5958	5415	0.863499	236	3	2	24	1	140	147	949	117	65	26	2	33	2213	318	107	123	107	698	17	21	25	3	22	6	3	7
pRSV7	Yes	RSV G1	Mild RSV	4411	4074	3554	0.805713	15	21	0	5	0	69	10	490	75	176	23	19	16	1887	145	11	150	18	262	46	18	13	10	68	3	1	3
pRSV8	Yes	RSV G1	Mild RSV	5989	5512	4941	0.825013	303	165	5	9	1	453	16	294	53	311	40	33	23	1503	145	32	70	42	768	510	62	26	16	41	3	6	11
pRSV12	Yes	RSV G1	Mild RSV	7209	6721	5875	0.814954	651	293	16	13	1	448	60	384	73	4	69	33	48	2090	134	30	134	76	579	644	12	2	1	19	55	1	5
pRSV13	Yes	RSV G1	Mild RSV	5700	5037	4431	0.777368	370	106	17	9	0	287	33	461	53	199	15	29	34	1503	101	7	70	39	679	333	33	11	12	17	0	4	9
pRSV3	Yes	RSV G2	Moderate RSV	7853	6151	5663	0.721126	470	83	13	13	0	632	67	442	81	347	50	29	53	1673	136	43	115	20	1120	119	37	48	20	16	6	2	28
pRSV4	Yes	RSV G2	Moderate RSV	6584	4260	3908	0.59356	861	88	9	5	1	228	26	390	49	11	41	24	37	1348	74	26	53	40	288	246	10	9	4	15	4	3	18
pRSV5	Yes	RSV G2	Moderate RSV	6488	6050	5314	0.819051	458	570	9	3	0	356	17	541	28	2	40	19	12	2240	90	19	142	41	350	318	1	1	2	17	27	1	10
pRSV10	Yes	RSV G2	Moderate RSV	6959	5785	5261	0.755999	1033	316	18	12	1	354	55	514	27	4	44	30	9	1771	121	9	103	48	370	363	12	5	4	3	14	0	21
pRSV11	Yes	RSV G2	Moderate RSV	6238	4301	3979	0.637865	657	112	8	3	0	104	31	379	10	12	15	5	13	1484	72	1	62	13	838	57	22	59	9	11	1	0	1
pRSV18	Yes	RSV G2	Moderate RSV	6052	5254	4871	0.804858	831	102	12	2	0	422	19	557	37	2	8	22	23	2056	103	13	73	43	403	89	4	3	6	19	9	2	11
pRSV1	Yes	RSV G3	Severe RSV	8192	6333	5779	0.705444	1695	298	12	9	1	113	70	302	58	2	5	57	11	1974	78	14	111	48	346	439	17	7	5	50	39	2	16
pRSV2	Yes	RSV G3	Severe RSV	5164	3281	3086	0.597599	920	74	9	3	0	45	10	108	11	0	5	1	2	1483	37	0	22	20	108	182	0	1	0	6	26	1	12
pRSV6	Yes	RSV G2	Severe RSV	5985	5636	5062	0.845781	1071	236	15	12	0	159	30	482	207	15	10	8	1	1947	153	34	83	48	280	192	23	7	4	32	7	0	6
pRSV14	Yes	RSV G3	Severe RSV	7297	5939	5514	0.755653	89	30	6	3	0	249	22	764	32	3	4	24	9	3188	54	3	118	40	513	328	4	3	5	11	6	0	6
pRSV15	Yes	RSV G3	Severe RSV	6016	5695	4920	0.817819	105	20	4	5	0	156	34	777	88	71	28	32	10	2650	159	13	116	30	330	239	14	3	6	27	1	1	1
pRSV16	Yes	RSV G3	Severe RSV	5905	5474	4935	0.835732	191	49	1	3	0	165	18	604	47	3	6	27	14	2853	187	13	155	42	420	100	11	6	2	10	5	0	3
pRSV17	Yes	RSV G3	Severe RSV	7561	7193	6470	0.855707	451	28	9	6	0	201	32	1087	89	14	51	75	71	3038	197	26	158	47	630	223	9	9	1	7	4	1	6
pOI1	No	Other Infection	Other Infection	5416	5072	4474	0.826071	520	166	13	16	0	251	32	500	20	15	24	9	23	1037	65	15	85	20	1015	512	35	26	52	5	4	4	10
pCoV1	No	COVID G1	Subacute COVID-19 (had other viral infections)	5569	4654	4209	0.755791	298	213	6	3	2	81	37	376	36	375	24	55	67	1468	59	41	86	15	564	271	29	25	47	30	1	0	0

## Sheet: Combined Comparisons
Annotation	Comparison	Direction	KW P-Value	KW p.adjust	Dunn Adjusted P-Value	MW P-Value	MW p.adjust
ISGhi Naive Treg	RSV vs Healthy	+	3.129e-06	7.50959e-05	5.21022e-05	1.06279e-05	0.000387774
ISGhi CD16+ Monocyte	RSV vs Healthy	+	7.39163e-06	0.000118266	4.4279e-05	1.19488e-05	0.000387774
ISGhi Tfh	RSV vs Healthy	+	5.69337e-05	0.000423028	0.000184584	1.30156e-05	0.000387774
ISGhi Naive CD4+ T	COVID vs Healthy	+	2.69276e-06	7.50959e-05	8.81083e-06	1.42557e-05	0.000387774
ISGhi Naive Treg	COVID vs Healthy	+	3.129e-06	7.50959e-05	1.36137e-05	1.63547e-05	0.000387774
ISGhi Naive CD4+ T	RSV vs Healthy	+	2.69276e-06	7.50959e-05	6.97668e-05	1.6362e-05	0.000387774
ISGhi CD14+ Monocyte	RSV vs Healthy	+	6.16916e-05	0.000423028	0.000111887	1.88501e-05	0.000387774
ISGhi Naive B	RSV vs Healthy	+	0.000240937	0.0011565	0.000287432	2.81239e-05	0.000506231
ISGhi Naive CD8+ T	RSV vs Healthy	+	4.13237e-05	0.000423028	0.000241501	5.71408e-05	0.000892618
ISGhi CD16+ Monocyte	COVID vs Healthy	+	7.39163e-06	0.000118266	4.4279e-05	6.37437e-05	0.000892618
ISGhi TrB	RSV vs Healthy	+	4.80073e-05	0.000423028	0.000149439	6.81861e-05	0.000892618
CD4+ TEMRA	RSV vs Healthy	+	0.000102895	0.000617368	0.000138182	7.6873e-05	0.000922476
Proliferating NK	COVID vs Healthy	+	0.000191021	0.00101878	0.000113653	0.000114333	0.00126645
ISGlo Naive CD4+ T	RSV vs Healthy	-	0.000740242	0.0027332	0.00178303	0.000125978	0.00129577
Proliferating T	RSV vs Healthy	+	0.000347579	0.00139032	0.000220363	0.000207398	0.00182633
ISGhi TrB	COVID vs Healthy	+	4.80073e-05	0.000423028	0.000358836	0.000214475	0.00182633
ISGlo CD16+ Monocyte	COVID vs Healthy	-	0.00031549	0.00137668	0.000302849	0.00022804	0.00182633
ISGhi Naive CD8+ T	COVID vs Healthy	+	4.13237e-05	0.000423028	0.000166553	0.000228292	0.00182633
ISGlo Naive Treg	RSV vs Healthy	-	0.00506997	0.0143152	0.0044523	0.000552457	0.00418704
Memory Treg	RSV vs Healthy	+	0.00138191	0.00455838	0.00157064	0.000782593	0.00563467
ISGlo Naive CD8+ T	COVID vs Healthy	-	0.00142449	0.00455838	0.00249003	0.00120501	0.00826291
ISGhi Tfh	COVID vs Healthy	+	5.69337e-05	0.000423028	0.000375875	0.0013359	0.00850046
ISGhi CD14+ Monocyte	COVID vs Healthy	+	6.16916e-05	0.000423028	0.00086422	0.00135771	0.00850046
ISGlo Tfh	COVID vs Healthy	-	0.00434327	0.0130298	0.00291953	0.00153067	0.00918403
CD4+ TEMRA	RSV vs COVID	+	0.000102895	0.000617368	0.0029664	0.00210625	0.012132
ISGlo CD16+ Monocyte	RSV vs Healthy	-	0.00031549	0.00137668	0.00641365	0.00288818	0.0159961
ISGlo Naive CD8+ T	RSV vs Healthy	-	0.00142449	0.00455838	0.00541175	0.00320934	0.0171165
Th22	RSV vs COVID	+	0.0159879	0.0383709	0.0128896	0.00454169	0.0233573
ISGlo CD14+ Monocyte	COVID vs Healthy	-	0.0186694	0.0426729	0.0217864	0.00650771	0.0323141
ISGhi Naive B	COVID vs Healthy	+	0.000240937	0.0011565	0.00360711	0.00783097	0.0371522
ISGlo Naive CD4+ T	COVID vs Healthy	-	0.000740242	0.0027332	0.00241736	0.00799805	0.0371522
Memory Treg	RSV vs COVID	+	0.00138191	0.00455838	0.014885	0.00853684	0.0372517
Proliferating NK	RSV vs COVID	-	0.000191021	0.00101878	0.0213907	0.00853684	0.0372517
Mo-DC	COVID vs Healthy	-	0.0121779	0.0307653	0.0182581	0.00947596	0.0401335
AXL+ SIGLEC6+ DC	RSV vs Healthy	-	0.00898524	0.0239606	0.0140198	0.011395	0.0468821
ISGlo Naive B	COVID vs Healthy	-	0.0329226	0.0658453	0.0271895	0.0119243	0.047697
Mo-DC	RSV vs Healthy	-	0.0121779	0.0307653	0.0182581	0.0126636	0.0485934
ISGhi CD163+ Monocyte	RSV vs Healthy	+	0.0286278	0.0624606	0.0259731	0.0128233	0.0485934
Proliferating T	RSV vs COVID	+	0.000347579	0.00139032	0.0343085	0.0134499	0.0496613
AXL+ SIGLEC6+ DC	COVID vs Healthy	-	0.00898524	0.0239606	0.0140198	0.0155307	0.0559105
CD56bright NK	RSV vs Healthy	-	0.0506761	0.083778	0.0498148	0.0174747	0.0613744
Cycling T	COVID vs Healthy	+	0.0469822	0.0805409	0.0443573	0.0191725	0.0657342
Th17	RSV vs COVID	+	0.0353348	0.0678429	0.051637	0.0200294	0.0670753
cDC1	RSV vs Healthy	-	0.0319998	0.0658453	0.0475085	0.0212367	0.069502
CD8- γδ T	COVID vs Healthy	-	0.0523613	0.083778	0.0664793	0.025167	0.0805344
AIM2hi Memory B	COVID vs Healthy	-	0.0774787	0.116218	0.0732142	0.0270841	0.0847849
pDC	COVID vs Healthy	-	0.0435983	0.0804891	0.062693	0.0300112	0.0919492
ISGlo CD14+ Monocyte	RSV vs COVID	+	0.0186694	0.0426729	0.0217864	0.0311703	0.093511
MGK	COVID vs Healthy	+	0.09671	0.136532	0.0922799	0.032575	0.0942902
cDC2	COVID vs Healthy	-	0.0462066	0.0805409	0.0410124	0.0327396	0.0942902
Th17	COVID vs Healthy	-	0.0353348	0.0678429	0.051637	0.0348496	0.0983988
Memory B	COVID vs Healthy	-	0.111882	0.149175	0.110467	0.0356361	0.0986846
pDC	RSV vs Healthy	-	0.0435983	0.0804891	0.0660093	0.0364942	0.0991542
GZMKhi CD8+ T	RSV vs COVID	+	0.104596	0.143446	0.130854	0.0394282	0.10323
CD4+ TCM	RSV vs COVID	+	0.0597486	0.0925139	0.0841901	0.0394282	0.10323
CD4+ TCM	COVID vs Healthy	-	0.0597486	0.0925139	0.0841901	0.0457465	0.117634
Erythroblast	COVID vs Healthy	+	0.0928871	0.135108	0.123736	0.0475869	0.120219
Proliferating NK	RSV vs Healthy	+	0.000191021	0.00101878	0.0747036	0.0494427	0.122754
FKBP5hi B	RSV vs Healthy	+	0.138957	0.180269	0.14949	0.0553516	0.135095
cDC1	COVID vs Healthy	-	0.0319998	0.0658453	0.0505045	0.0580289	0.139269
CD8- γδ T	RSV vs COVID	+	0.0523613	0.083778	0.0911232	0.0615443	0.143754
Proliferating T	COVID vs Healthy	+	0.000347579	0.00139032	0.100136	0.0624905	0.143754
ISGlo Naive Treg	COVID vs Healthy	-	0.00506997	0.0143152	0.0395276	0.0628925	0.143754
cDC2	RSV vs COVID	+	0.0462066	0.0805409	0.203463	0.0699809	0.157457
ISGlo Tfh	RSV vs COVID	+	0.00434327	0.0130298	0.0932769	0.0759801	0.168325
Erythroblast	RSV vs Healthy	+	0.0928871	0.135108	0.132085	0.0787249	0.171763
ISGlo Tfh	RSV vs Healthy	-	0.00434327	0.0130298	0.0932769	0.081366	0.174876
Cycling T	RSV vs COVID	-	0.0469822	0.0805409	0.161019	0.0994036	0.210247
ISGhi CD163+ Monocyte	RSV vs COVID	+	0.0286278	0.0624606	0.148998	0.100743	0.210247
Th22	RSV vs Healthy	+	0.0159879	0.0383709	0.148107	0.10599	0.218037
GZMKhi CD8+ T	COVID vs Healthy	-	0.104596	0.143446	0.130854	0.121151	0.245715
Th2	RSV vs COVID	+	0.239147	0.302081	0.298453	0.124192	0.248384
CD56bright NK	RSV vs COVID	-	0.0506761	0.083778	0.181332	0.128259	0.253005
ISGlo Naive B	RSV vs Healthy	-	0.0329226	0.0658453	0.218998	0.136405	0.265436
ISGlo TrB	RSV vs Healthy	+	0.430132	0.503569	0.534521	0.153886	0.295461
CD8+ γδ T	COVID vs Healthy	-	0.315745	0.38861	0.401491	0.168283	0.318852
AIM2hi Memory B	RSV vs COVID	+	0.0774787	0.116218	0.266594	0.180854	0.338221
Th2	COVID vs Healthy	-	0.239147	0.302081	0.298453	0.187726	0.346572
Th1	RSV vs COVID	+	0.421888	0.503569	0.537393	0.193305	0.349546
cDC2	RSV vs Healthy	-	0.0462066	0.0805409	0.297806	0.194192	0.349546
FKBP5hi B	COVID vs Healthy	-	0.138957	0.180269	0.301393	0.198353	0.352628
ISGlo CD16+ Monocyte	RSV vs COVID	+	0.00031549	0.00137668	0.255212	0.204393	0.355621
ISGlo Naive B	RSV vs COVID	+	0.0329226	0.0658453	0.218998	0.204976	0.355621
Plasmablast	RSV vs COVID	-	0.503184	0.561694	0.603427	0.239959	0.411359
Memory B	RSV vs COVID	+	0.111882	0.149175	0.344574	0.253973	0.426915
Th22	COVID vs Healthy	-	0.0159879	0.0383709	0.241037	0.254963	0.426915
MGK	RSV vs COVID	-	0.09671	0.136532	0.296249	0.258452	0.427783
ISGhi CD163+ Monocyte	COVID vs Healthy	+	0.0286278	0.0624606	0.341544	0.263163	0.430631
DN2 B	COVID vs Healthy	+	0.441658	0.504752	0.425321	0.269645	0.436279
DN2 B	RSV vs COVID	+	0.441658	0.504752	0.425321	0.281188	0.449901
CD8+ γδ T	RSV vs COVID	+	0.315745	0.38861	0.49286	0.295705	0.467928
CD56dim NK	COVID vs Healthy	-	0.599266	0.639217	0.584769	0.301461	0.468584
CD4+ TEMRA	COVID vs Healthy	+	0.000102895	0.000617368	0.339568	0.302627	0.468584
MGK	RSV vs Healthy	+	0.09671	0.136532	0.296249	0.307848	0.471597
ISGhi Naive CD4+ T	RSV vs COVID	-	2.69276e-06	7.50959e-05	0.464906	0.325945	0.494065
AIM2hi Memory B	RSV vs Healthy	-	0.0774787	0.116218	0.334749	0.340704	0.511057
Cycling T	RSV vs Healthy	+	0.0469822	0.0805409	0.371246	0.349869	0.517789
Memory Treg	COVID vs Healthy	+	0.00138191	0.00455838	0.386388	0.352384	0.517789
MAIT	RSV vs COVID	-	0.583202	0.636221	0.718161	0.366445	0.533011
Memory B	RSV vs Healthy	-	0.111882	0.149175	0.344574	0.374944	0.539919
ISGhi Naive Treg	RSV vs COVID	-	3.129e-06	7.50959e-05	0.568162	0.419042	0.597446
CD56bright NK	COVID vs Healthy	+	0.0506761	0.083778	0.41121	0.428243	0.604579
MAIT	RSV vs Healthy	-	0.583202	0.636221	0.718161	0.466116	0.651657
CD56dim NK	RSV vs Healthy	-	0.599266	0.639217	0.584769	0.485724	0.666136
ISGlo TrB	RSV vs COVID	+	0.430132	0.503569	0.534521	0.485724	0.666136
ILC2	RSV vs Healthy	+	0.713854	0.744891	0.785333	0.492826	0.666834
HSPC	RSV vs Healthy	+	0.737765	0.753463	0.811576	0.495495	0.666834
ILC2	RSV vs COVID	+	0.713854	0.744891	0.785333	0.50292	0.67056
FKBP5hi B	RSV vs COVID	+	0.138957	0.180269	0.517331	0.515006	0.675396
Th1	RSV vs Healthy	-	0.421888	0.503569	0.537393	0.515927	0.675396
CD8+ γδ T	RSV vs Healthy	-	0.315745	0.38861	0.57326	0.526243	0.676599
ISGhi Naive CD8+ T	RSV vs COVID	-	4.13237e-05	0.000423028	0.7128	0.526243	0.676599
HSPC	RSV vs COVID	+	0.737765	0.753463	0.811576	0.537445	0.684886
Plasmablast	COVID vs Healthy	+	0.503184	0.561694	0.603427	0.556491	0.69819
Th1	COVID vs Healthy	-	0.421888	0.503569	0.537393	0.557582	0.69819
ISGlo Naive Treg	RSV vs COVID	-	0.00506997	0.0143152	0.370292	0.568423	0.699597
ISGlo Naive CD8+ T	RSV vs COVID	+	0.00142449	0.00455838	0.60054	0.568423	0.699597
Plasmablast	RSV vs Healthy	+	0.503184	0.561694	0.603427	0.634127	0.767876
CD8- γδ T	RSV vs Healthy	-	0.0523613	0.083778	0.634798	0.634564	0.767876
MAIT	COVID vs Healthy	-	0.583202	0.636221	0.718161	0.654322	0.775845
ISGhi Naive B	RSV vs COVID	+	0.000240937	0.0011565	0.433793	0.657231	0.775845
pDC	RSV vs COVID	+	0.0435983	0.0804891	0.719527	0.657313	0.775845
Erythroblast	RSV vs COVID	-	0.0928871	0.135108	0.695614	0.676023	0.791441
ISGhi CD14+ Monocyte	RSV vs COVID	+	6.16916e-05	0.000423028	0.557414	0.70376	0.817269
Th2	RSV vs Healthy	+	0.239147	0.302081	0.776047	0.750795	0.851911
ISGhi TrB	RSV vs COVID	-	4.80073e-05	0.000423028	0.777704	0.751276	0.851911
CD4+ TCM	RSV vs Healthy	+	0.0597486	0.0925139	0.819503	0.751338	0.851911
CD8+ TEMRA	COVID vs Healthy	+	0.98038	0.98038	0.960278	0.807074	0.907958
Mo-DC	RSV vs COVID	+	0.0121779	0.0307653	0.827166	0.821963	0.913248
ISGlo Naive CD4+ T	RSV vs COVID	-	0.000740242	0.0027332	0.846209	0.82446	0.913248
cDC1	RSV vs COVID	-	0.0319998	0.0658453	0.817733	0.845211	0.92637
Th17	RSV vs Healthy	-	0.0353348	0.0678429	0.849613	0.849173	0.92637
ILC2	COVID vs Healthy	+	0.713854	0.744891	0.907749	0.857078	0.927965
ISGlo CD14+ Monocyte	RSV vs Healthy	+	0.0186694	0.0426729	0.929182	0.874104	0.939336
ISGhi Tfh	RSV vs COVID	+	5.69337e-05	0.000423028	0.806556	0.899112	0.952029
ISGhi CD16+ Monocyte	RSV vs COVID	-	7.39163e-06	0.000118266	0.989935	0.899138	0.952029
HSPC	COVID vs Healthy	+	0.737765	0.753463	0.91905	0.917169	0.956107
AXL+ SIGLEC6+ DC	RSV vs COVID	-	0.00898524	0.0239606	0.946985	0.922237	0.956107
DN2 B	RSV vs Healthy	+	0.441658	0.504752	0.963095	0.936818	0.956107
ISGlo TrB	COVID vs Healthy	+	0.430132	0.503569	0.755847	0.94508	0.956107
CD8+ TEMRA	RSV vs COVID	+	0.98038	0.98038	0.960278	0.949074	0.956107
CD56dim NK	RSV vs COVID	+	0.599266	0.639217	0.94877	0.949468	0.956107
GZMKhi CD8+ T	RSV vs Healthy	-	0.104596	0.143446	0.838693	0.949468	0.956107
CD8+ TEMRA	RSV vs Healthy	+	0.98038	0.98038	0.960278	1	1

## Sheet: Healthy Control Comparisons
Annotation	Comparison	Direction	MW P-Value	Within Subset MW p.adjust	MW p.adjust
ISGhi Naive Treg	COVID G2 vs Healthy	+	2.89178e-05	0.000202424	0.00776645
ISGhi Naive CD4+ T	COVID G2 vs Healthy	+	5.08494e-05	0.000355946	0.00776645
ISGlo Naive CD4+ T	RSV G2 vs Healthy	-	6.93433e-05	0.000485403	0.00776645
ISGhi Naive CD8+ T	COVID G2 vs Healthy	+	0.000182763	0.00126744	0.0112281
ISGhi CD16+ Monocyte	RSV G2 vs Healthy	+	0.000222798	0.000890819	0.0112281
ISGhi CD14+ Monocyte	RSV G2 vs Healthy	+	0.000229221	0.00160454	0.0112281
ISGhi CD16+ Monocyte	COVID G2 vs Healthy	+	0.00025452	0.000890819	0.0112281
ISGhi Tfh	RSV G2 vs Healthy	+	0.000290909	0.00203636	0.0112281
ISGlo Naive CD8+ T	RSV G1 vs Healthy	-	0.00030379	0.00212653	0.0112281
ISGlo CD16+ Monocyte	COVID G3_S vs Healthy	-	0.000334169	0.00233918	0.0112281
ISGhi Naive B	RSV G3 vs Healthy	+	0.000464022	0.00324816	0.0130365
ISGhi Naive CD4+ T	RSV G2 vs Healthy	+	0.000543189	0.00177981	0.0130365
ISGhi Naive CD8+ T	RSV G2 vs Healthy	+	0.000543189	0.00126744	0.0130365
ISGhi Naive CD8+ T	RSV G3 vs Healthy	+	0.000543189	0.00126744	0.0130365
ISGhi CD163+ Monocyte	COVID G3_S vs Healthy	+	0.000596028	0.0041722	0.013351
ISGlo Naive CD4+ T	COVID G3_S vs Healthy	-	0.000668338	0.00212653	0.0140351
ISGhi Naive CD4+ T	RSV G3 vs Healthy	+	0.000762777	0.00177981	0.0150761
Proliferating NK	COVID G2 vs Healthy	+	0.000826965	0.00578876	0.0154367
ISGlo Naive CD4+ T	COVID G3 vs Healthy	-	0.000911369	0.00212653	0.0156937
ISGlo CD16+ Monocyte	COVID G2 vs Healthy	-	0.000970591	0.00339707	0.0156937
ISGhi Naive Treg	RSV G2 vs Healthy	+	0.000980855	0.00296773	0.0156937
ISGhi Tfh	COVID G2 vs Healthy	+	0.00103507	0.00362273	0.0158083
ISGlo Tfh	COVID G2 vs Healthy	-	0.00132572	0.00928001	0.0186723
ISGhi Naive Treg	RSV G1 vs Healthy	+	0.00133373	0.00296773	0.0186723
CD56dim NK	RSV G3 vs Healthy	-	0.00142154	0.00995077	0.0191055
ISGhi CD163+ Monocyte	RSV G2 vs Healthy	+	0.00160205	0.00560716	0.0203501
ISGhi TrB	COVID G2 vs Healthy	+	0.00166913	0.00785712	0.0203501
ISGhi Naive Treg	RSV G3 vs Healthy	+	0.00169584	0.00296773	0.0203501
CD4+ TEMRA	RSV G1 vs Healthy	+	0.00204617	0.0143232	0.0237074
Proliferating T	RSV G1 vs Healthy	+	0.00218282	0.0152797	0.023872
ISGhi Naive CD4+ T	RSV G1 vs Healthy	+	0.00220248	0.00385433	0.023872
FKBP5hi B	COVID G3_S vs Healthy	+	0.00240519	0.0168363	0.0240205
ISGlo Naive CD8+ T	COVID G2 vs Healthy	-	0.0024195	0.00846826	0.0240205
ISGlo Naive Treg	RSV G2 vs Healthy	-	0.00250214	0.015949	0.0240205
ISGlo CD16+ Monocyte	RSV G3 vs Healthy	-	0.00250214	0.00583832	0.0240205
MGK	COVID G3 vs Healthy	+	0.00322171	0.0225519	0.0300693
ISGhi CD16+ Monocyte	RSV G1 vs Healthy	+	0.00364886	0.008514	0.0327767
ISGhi Tfh	RSV G1 vs Healthy	+	0.00370689	0.00864941	0.0327767
ISGhi TrB	RSV G3 vs Healthy	+	0.00381066	0.00785712	0.0328303
ILC2	COVID G1 vs Healthy	+	0.00405597	0.0283918	0.0340701
ISGhi TrB	COVID G3 vs Healthy	+	0.00438915	0.00785712	0.0355985
ISGhi Naive CD4+ T	COVID G3 vs Healthy	+	0.00455685	0.00637959	0.0355985
ISGlo Naive Treg	RSV G1 vs Healthy	-	0.00455685	0.015949	0.0355985
ISGhi TrB	RSV G2 vs Healthy	+	0.00466753	0.00785712	0.0355985
Proliferating NK	COVID G3 vs Healthy	+	0.00478361	0.0142104	0.0355985
ISGhi Naive B	RSV G2 vs Healthy	+	0.00500515	0.017518	0.0355985
Mo-DC	RSV G3 vs Healthy	-	0.00500515	0.0329312	0.0355985
CD4+ TEMRA	RSV G3 vs Healthy	+	0.0050855	0.0145268	0.0355985
ISGhi TrB	RSV G1 vs Healthy	+	0.00561223	0.00785712	0.0379545
ISGlo CD14+ Monocyte	COVID G2 vs Healthy	-	0.005648	0.039536	0.0379545
Proliferating NK	RSV G1 vs Healthy	+	0.00609016	0.0142104	0.0399625
CD4+ TEMRA	RSV G2 vs Healthy	+	0.00622576	0.0145268	0.0399625
ISGhi CD14+ Monocyte	RSV G3 vs Healthy	+	0.00630361	0.0169845	0.0399625
ISGlo Naive CD8+ T	RSV G2 vs Healthy	-	0.00679565	0.0158565	0.0412687
ISGhi Tfh	RSV G3 vs Healthy	+	0.00682852	0.0119499	0.0412687
Erythroblast	RSV G3 vs Healthy	+	0.00687812	0.0481468	0.0412687
ISGlo Naive CD4+ T	COVID G1 vs Healthy	-	0.00704224	0.0119247	0.0415121
ISGhi CD14+ Monocyte	COVID G2 vs Healthy	+	0.0073773	0.0169845	0.042037
ISGhi CD16+ Monocyte	RSV G3 vs Healthy	+	0.00738149	0.0129176	0.042037
Proliferating T	COVID G3_S vs Healthy	+	0.00803238	0.0272603	0.0449813
ISGlo Naive CD4+ T	RSV G3 vs Healthy	-	0.00851767	0.0119247	0.0461603
Memory Treg	RSV G2 vs Healthy	+	0.00851767	0.0370929	0.0461603
Mo-DC	COVID G2 vs Healthy	-	0.00940891	0.0329312	0.0499862
ISGhi CD16+ Monocyte	COVID G3 vs Healthy	+	0.00952117	0.0133296	0.0499862
ISGhi CD14+ Monocyte	RSV G1 vs Healthy	+	0.00970545	0.0169845	0.0501697
Memory Treg	RSV G3 vs Healthy	+	0.010598	0.0370929	0.0539533
ISGhi Naive B	RSV G1 vs Healthy	+	0.0119309	0.0278387	0.0583159
ISGhi Naive Treg	COVID G3 vs Healthy	+	0.0120202	0.0168283	0.0583159
ISGlo CD16+ Monocyte	COVID G3 vs Healthy	-	0.0121491	0.021261	0.0583159
ISGhi CD14+ Monocyte	COVID G3 vs Healthy	+	0.0121491	0.0170088	0.0583159
ISGlo CD14+ Monocyte	COVID G3_S vs Healthy	-	0.0126984	0.0444444	0.0600939
Proliferating T	RSV G3 vs Healthy	+	0.013053	0.0272603	0.06019
pDC	RSV G3 vs Healthy	-	0.013077	0.0615596	0.06019
Th17	COVID G2 vs Healthy	-	0.0144448	0.101114	0.0655873
Proliferating T	RSV G2 vs Healthy	+	0.0155773	0.0272603	0.0697863
ISGlo Naive B	COVID G2 vs Healthy	-	0.0158088	0.110661	0.0698914
pDC	COVID G3_S vs Healthy	-	0.0175885	0.0615596	0.0762933
CD8- γδ T	COVID G3_S vs Healthy	-	0.0177109	0.0703007	0.0762933
CD8- γδ T	COVID G2 vs Healthy	-	0.0200859	0.0703007	0.0854287
ISGhi Naive B	COVID G2 vs Healthy	+	0.0247118	0.0432456	0.103789
Th1	COVID G1 vs Healthy	+	0.0310936	0.217656	0.128712
Memory Treg	COVID G3_S vs Healthy	+	0.0314119	0.0676502	0.128712
ISGlo CD16+ Monocyte	RSV G2 vs Healthy	-	0.033724	0.0472136	0.136521
cDC1	COVID G2 vs Healthy	-	0.0344585	0.24121	0.137834
CD4+ TCM	COVID G3 vs Healthy	-	0.0386572	0.270601	0.1476
ISGhi Naive CD8+ T	RSV G1 vs Healthy	+	0.0386572	0.0676502	0.1476
Cycling T	COVID G3 vs Healthy	+	0.0386572	0.231399	0.1476
Memory Treg	RSV G1 vs Healthy	+	0.0386572	0.0676502	0.1476
Memory B	COVID G2 vs Healthy	-	0.039489	0.193615	0.148008
ILC2	RSV G1 vs Healthy	+	0.0396449	0.138757	0.148008
AIM2hi Memory B	COVID G3 vs Healthy	-	0.0410749	0.287524	0.150013
ISGhi Naive B	COVID G3 vs Healthy	+	0.0410749	0.0575048	0.150013
Th22	RSV G2 vs Healthy	+	0.0420742	0.294519	0.15201
CD4+ TEMRA	COVID G1 vs Healthy	+	0.0436282	0.0763494	0.155948
CD8+ γδ T	COVID G1 vs Healthy	+	0.0461322	0.231399	0.161463
ISGlo CD14+ Monocyte	COVID G1 vs Healthy	+	0.0461322	0.107642	0.161463
ISGlo Naive CD4+ T	RSV G1 vs Healthy	-	0.047695	0.0556442	0.161874
ISGlo Naive CD8+ T	COVID G3 vs Healthy	-	0.047695	0.0834662	0.161874
CD56bright NK	RSV G1 vs Healthy	-	0.047695	0.333865	0.161874
Proliferating T	COVID G2 vs Healthy	+	0.0485042	0.0679059	0.162974
Mo-DC	COVID G1 vs Healthy	+	0.0523451	0.122138	0.174138
AXL+ SIGLEC6+ DC	COVID G3 vs Healthy	-	0.0531429	0.115367	0.175059
pDC	COVID G2 vs Healthy	-	0.0540779	0.126182	0.176409
Memory B	RSV G3 vs Healthy	-	0.0553186	0.193615	0.17702
ISGlo Naive B	RSV G3 vs Healthy	-	0.0553186	0.193615	0.17702
Memory Treg	COVID G3 vs Healthy	+	0.0583276	0.0816587	0.183746
MGK	RSV G3 vs Healthy	+	0.0585144	0.2048	0.183746
AXL+ SIGLEC6+ DC	COVID G2 vs Healthy	-	0.0632158	0.115367	0.196671
ISGlo Naive Treg	RSV G3 vs Healthy	-	0.0645471	0.141627	0.198342
Erythroblast	COVID G3 vs Healthy	+	0.0655039	0.229264	0.198342
Cycling T	COVID G2 vs Healthy	+	0.0661139	0.231399	0.198342
CD8+ γδ T	COVID G2 vs Healthy	-	0.0661139	0.231399	0.198342
FKBP5hi B	RSV G2 vs Healthy	+	0.0718049	0.251317	0.213508
AXL+ SIGLEC6+ DC	RSV G2 vs Healthy	-	0.0762665	0.115367	0.222831
AXL+ SIGLEC6+ DC	RSV G3 vs Healthy	-	0.0762665	0.115367	0.222831
AXL+ SIGLEC6+ DC	COVID G3_S vs Healthy	-	0.0824051	0.115367	0.237746
cDC2	COVID G3 vs Healthy	-	0.0840387	0.315951	0.237746
ISGhi Naive CD8+ T	COVID G3 vs Healthy	+	0.0849092	0.11501	0.237746
ISGlo TrB	RSV G1 vs Healthy	+	0.0849092	0.504094	0.237746
Mo-DC	RSV G1 vs Healthy	-	0.0849092	0.148591	0.237746
ISGhi CD163+ Monocyte	COVID G3 vs Healthy	+	0.0881193	0.205612	0.242525
ISGlo Naive CD4+ T	COVID G2 vs Healthy	-	0.0882301	0.0882301	0.242525
cDC1	RSV G3 vs Healthy	-	0.0887814	0.299284	0.242525
cDC2	COVID G2 vs Healthy	-	0.0902717	0.315951	0.244607
AIM2hi Memory B	COVID G2 vs Healthy	-	0.0963972	0.295438	0.259116
ISGhi Naive CD8+ T	COVID G3_S vs Healthy	+	0.0985798	0.11501	0.26081
ISGlo Naive Treg	COVID G3_S vs Healthy	-	0.0985798	0.141627	0.26081
CD56bright NK	RSV G2 vs Healthy	-	0.0994903	0.343288	0.261162
ISGlo Naive Treg	COVID G3 vs Healthy	-	0.101162	0.141627	0.263492
CD4+ TEMRA	COVID G3_S vs Healthy	+	0.107109	0.149953	0.276836
CD8+ TEMRA	RSV G1 vs Healthy	+	0.113504	0.794528	0.290761
Th22	COVID G2 vs Healthy	-	0.115509	0.306144	0.290761
CD56dim NK	COVID G2 vs Healthy	-	0.115958	0.306298	0.290761
GZMKhi CD8+ T	COVID G2 vs Healthy	-	0.115958	0.811708	0.290761
ISGlo Tfh	RSV G1 vs Healthy	-	0.119617	0.327111	0.296388
ISGlo Naive B	COVID G3_S vs Healthy	-	0.119967	0.279922	0.296388
AIM2hi Memory B	RSV G3 vs Healthy	-	0.126616	0.295438	0.306268
ISGhi Tfh	COVID G3_S vs Healthy	+	0.12663	0.170429	0.306268
Erythroblast	COVID G2 vs Healthy	+	0.1267	0.295634	0.306268
ISGhi CD163+ Monocyte	RSV G1 vs Healthy	+	0.129541	0.226697	0.30844
Plasmablast	COVID G1 vs Healthy	+	0.131007	0.638414	0.30844
Th22	COVID G1 vs Healthy	+	0.131205	0.306144	0.30844
CD56dim NK	COVID G1 vs Healthy	-	0.131271	0.306298	0.30844
ISGlo Tfh	COVID G3 vs Healthy	-	0.140351	0.327111	0.325227
pDC	COVID G3 vs Healthy	-	0.140351	0.245614	0.325227
ISGlo TrB	COVID G3_S vs Healthy	-	0.144027	0.504094	0.331459
ISGhi Tfh	COVID G3 vs Healthy	+	0.146082	0.170429	0.333901
CD56bright NK	RSV G3 vs Healthy	-	0.147123	0.343288	0.33401
ISGlo Naive Treg	COVID G2 vs Healthy	-	0.150115	0.175135	0.338515
cDC1	RSV G2 vs Healthy	-	0.156127	0.299284	0.349725
Memory B	COVID G1 vs Healthy	+	0.161119	0.375945	0.356925
CD4+ TCM	COVID G2 vs Healthy	-	0.163063	0.554386	0.356925
MGK	COVID G1 vs Healthy	+	0.163155	0.380695	0.356925
ISGlo Naive B	COVID G3 vs Healthy	-	0.163591	0.286284	0.356925
cDC2	RSV G2 vs Healthy	-	0.166265	0.387953	0.360421
AXL+ SIGLEC6+ DC	RSV G1 vs Healthy	-	0.171019	0.199522	0.366003
cDC1	RSV G1 vs Healthy	-	0.171019	0.299284	0.366003
FKBP5hi B	COVID G2 vs Healthy	-	0.173838	0.347296	0.369681
DN2 B	COVID G2 vs Healthy	+	0.175768	0.796997	0.370889
Th2	COVID G1 vs Healthy	+	0.177103	0.599131	0.370889
Mo-DC	COVID G3_S vs Healthy	+	0.177717	0.244411	0.370889
Plasmablast	RSV G1 vs Healthy	+	0.182404	0.638414	0.378319
ILC2	COVID G3_S vs Healthy	+	0.185859	0.433672	0.382959
ISGlo Tfh	RSV G3 vs Healthy	-	0.186921	0.327111	0.382959
FKBP5hi B	RSV G3 vs Healthy	-	0.198455	0.347296	0.404126
Proliferating NK	RSV G3 vs Healthy	+	0.20391	0.356842	0.412733
Mo-DC	COVID G3 vs Healthy	-	0.209495	0.244411	0.421499
MAIT	COVID G1 vs Healthy	+	0.215114	0.817965	0.427681
ISGlo CD16+ Monocyte	COVID G1 vs Healthy	-	0.215114	0.248804	0.427681
ISGlo CD14+ Monocyte	COVID G3 vs Healthy	-	0.217741	0.381047	0.430359
Th2	COVID G3_S vs Healthy	+	0.223597	0.599131	0.439349
Th17	COVID G3_S vs Healthy	+	0.226025	0.713572	0.441536
MAIT	RSV G3 vs Healthy	-	0.233704	0.817965	0.4521
ISGhi Naive B	COVID G1 vs Healthy	+	0.234123	0.273144	0.4521
ISGlo TrB	COVID G1 vs Healthy	+	0.235729	0.550034	0.4526
ISGhi Naive Treg	COVID G1 vs Healthy	+	0.240786	0.280916	0.459682
ISGlo CD16+ Monocyte	RSV G1 vs Healthy	-	0.248804	0.248804	0.470631
Erythroblast	COVID G1 vs Healthy	+	0.249323	0.372436	0.470631
Th2	COVID G2 vs Healthy	+	0.25677	0.599131	0.481049
CD4+ TCM	COVID G1 vs Healthy	+	0.257705	0.554386	0.481049
cDC1	COVID G3_S vs Healthy	-	0.265928	0.372299	0.491125
Erythroblast	RSV G1 vs Healthy	+	0.266026	0.372436	0.491125
ISGhi Naive CD4+ T	COVID G3_S vs Healthy	+	0.275021	0.320858	0.499891
CD4+ TEMRA	COVID G3 vs Healthy	+	0.276446	0.32252	0.499891
AIM2hi Memory B	COVID G1 vs Healthy	+	0.28098	0.491715	0.499891
ISGlo Naive B	COVID G1 vs Healthy	+	0.281062	0.393487	0.499891
ISGlo Tfh	COVID G1 vs Healthy	+	0.281062	0.393487	0.499891
Memory B	COVID G3 vs Healthy	-	0.282676	0.494684	0.499891
CD56dim NK	RSV G1 vs Healthy	+	0.282676	0.494684	0.499891
pDC	RSV G1 vs Healthy	-	0.282676	0.395747	0.499891
MGK	COVID G2 vs Healthy	+	0.284623	0.435347	0.500699
ISGlo CD14+ Monocyte	RSV G2 vs Healthy	+	0.287781	0.402893	0.50285
Th1	COVID G3 vs Healthy	-	0.28884	0.955828	0.50285
AXL+ SIGLEC6+ DC	COVID G1 vs Healthy	-	0.291095	0.291095	0.504164
DN2 B	COVID G1 vs Healthy	+	0.304158	0.796997	0.521596
ISGhi CD14+ Monocyte	COVID G1 vs Healthy	+	0.305734	0.35669	0.521596
Th17	COVID G1 vs Healthy	+	0.305817	0.713572	0.521596
MGK	COVID G3_S vs Healthy	+	0.310962	0.435347	0.527694
CD4+ TCM	COVID G3_S vs Healthy	+	0.316792	0.554386	0.534885
CD56bright NK	COVID G2 vs Healthy	+	0.319096	0.558418	0.536082
ISGhi TrB	COVID G3_S vs Healthy	+	0.338072	0.394417	0.562337
HSPC	COVID G3_S vs Healthy	+	0.338072	0.980603	0.562337
Plasmablast	COVID G3 vs Healthy	-	0.3444	0.8036	0.56951
Th2	COVID G3 vs Healthy	-	0.345774	0.605104	0.56951
cDC2	COVID G1 vs Healthy	+	0.35253	0.571291	0.577806
CD8- γδ T	COVID G3 vs Healthy	-	0.3587	0.630722	0.584076
CD8+ TEMRA	RSV G3 vs Healthy	-	0.361088	0.91093	0.584076
Memory B	COVID G3_S vs Healthy	-	0.361571	0.506199	0.584076
FKBP5hi B	RSV G1 vs Healthy	-	0.381158	0.533622	0.612422
CD8+ γδ T	RSV G3 vs Healthy	-	0.382764	0.893115	0.612422
ILC2	RSV G2 vs Healthy	-	0.385282	0.630064	0.613529
Th22	COVID G3_S vs Healthy	+	0.394243	0.678175	0.624838
ISGhi CD163+ Monocyte	COVID G1 vs Healthy	+	0.407716	0.500661	0.641306
DN2 B	RSV G3 vs Healthy	-	0.408601	0.796997	0.641306
CD56dim NK	COVID G3_S vs Healthy	-	0.410359	0.574503	0.641306
pDC	RSV G2 vs Healthy	-	0.418071	0.41883	0.642589
ISGlo Tfh	RSV G2 vs Healthy	-	0.418071	0.487749	0.642589
ISGlo Naive B	RSV G2 vs Healthy	-	0.418071	0.487749	0.642589
pDC	COVID G1 vs Healthy	-	0.41883	0.41883	0.642589
HSPC	RSV G1 vs Healthy	+	0.428758	0.980603	0.652445
ISGhi CD163+ Monocyte	RSV G3 vs Healthy	+	0.429138	0.500661	0.652445
Th2	RSV G1 vs Healthy	+	0.433227	0.606517	0.655694
ISGhi CD16+ Monocyte	COVID G3_S vs Healthy	+	0.443515	0.517434	0.667097
CD8- γδ T	RSV G1 vs Healthy	-	0.445584	0.630722	0.667097
CD8- γδ T	COVID G1 vs Healthy	+	0.450516	0.630722	0.667097
ISGlo CD14+ Monocyte	RSV G3 vs Healthy	-	0.455123	0.530977	0.667097
ISGlo TrB	RSV G2 vs Healthy	+	0.455123	0.747925	0.667097
Cycling T	RSV G3 vs Healthy	+	0.455123	0.741131	0.667097
DN2 B	RSV G1 vs Healthy	+	0.455427	0.796997	0.667097
ISGhi Naive Treg	COVID G3_S vs Healthy	+	0.456644	0.456644	0.667097
MAIT	COVID G2 vs Healthy	-	0.465004	0.820081	0.673542
Mo-DC	RSV G2 vs Healthy	-	0.465065	0.465065	0.673542
Erythroblast	COVID G3_S vs Healthy	-	0.468123	0.546143	0.675061
cDC2	RSV G3 vs Healthy	-	0.476628	0.571291	0.683787
Proliferating T	COVID G3 vs Healthy	+	0.478244	0.557951	0.683787
ISGlo Naive CD8+ T	COVID G1 vs Healthy	-	0.483516	0.576187	0.68571
Th22	RSV G3 vs Healthy	+	0.484411	0.678175	0.68571
CD4+ TEMRA	COVID G2 vs Healthy	+	0.489232	0.489232	0.68571
cDC2	COVID G3_S vs Healthy	-	0.489678	0.571291	0.68571
GZMKhi CD8+ T	COVID G3 vs Healthy	-	0.492899	1	0.68571
Th1	RSV G2 vs Healthy	-	0.493875	0.955828	0.68571
ISGlo Naive CD8+ T	RSV G3 vs Healthy	-	0.493875	0.576187	0.68571
HSPC	COVID G1 vs Healthy	+	0.511661	0.980603	0.707482
CD4+ TCM	RSV G2 vs Healthy	+	0.534232	0.747925	0.729683
CD56dim NK	RSV G2 vs Healthy	+	0.534232	0.623271	0.729683
ISGlo TrB	RSV G3 vs Healthy	+	0.534232	0.747925	0.729683
MAIT	RSV G1 vs Healthy	-	0.542644	0.820081	0.735196
Cycling T	RSV G1 vs Healthy	+	0.542644	0.741131	0.735196
Th1	RSV G3 vs Healthy	-	0.546187	0.955828	0.737024
HSPC	RSV G3 vs Healthy	+	0.560345	0.980603	0.753103
cDC2	RSV G1 vs Healthy	-	0.577319	0.577319	0.772826
Th22	RSV G1 vs Healthy	+	0.583295	0.680511	0.777727
Cycling T	RSV G2 vs Healthy	+	0.589226	0.741131	0.782529
ILC2	COVID G2 vs Healthy	-	0.593538	0.630064	0.783463
GZMKhi CD8+ T	RSV G1 vs Healthy	+	0.594593	1	0.783463
ILC2	RSV G3 vs Healthy	+	0.601752	0.630064	0.7898
cDC1	COVID G3 vs Healthy	-	0.615449	0.718024	0.804634
Th17	RSV G2 vs Healthy	-	0.619409	0.93303	0.806672
FKBP5hi B	COVID G3 vs Healthy	-	0.630064	0.657132	0.81158
ILC2	COVID G3 vs Healthy	+	0.630064	0.630064	0.81158
ISGhi CD163+ Monocyte	COVID G2 vs Healthy	+	0.632831	0.632831	0.81158
Cycling T	COVID G3_S vs Healthy	+	0.635255	0.741131	0.81158
ISGlo Tfh	COVID G3_S vs Healthy	+	0.635255	0.635255	0.81158
AIM2hi Memory B	RSV G2 vs Healthy	+	0.656347	0.879218	0.833194
FKBP5hi B	COVID G1 vs Healthy	-	0.657132	0.657132	0.833194
CD56bright NK	COVID G1 vs Healthy	+	0.666342	0.814035	0.838679
Th17	COVID G3 vs Healthy	-	0.66645	0.93303	0.838679
CD8+ TEMRA	COVID G3_S vs Healthy	+	0.681392	0.91093	0.854283
ISGhi Naive B	COVID G3_S vs Healthy	+	0.684983	0.684983	0.855592
MAIT	COVID G3_S vs Healthy	-	0.697744	0.820081	0.860571
CD56bright NK	COVID G3_S vs Healthy	+	0.697744	0.814035	0.860571
DN2 B	RSV G2 vs Healthy	+	0.702909	0.879218	0.860571
Proliferating NK	RSV G2 vs Healthy	+	0.703094	0.879489	0.860571
CD56dim NK	COVID G3 vs Healthy	+	0.704337	0.704337	0.860571
CD4+ TCM	RSV G1 vs Healthy	-	0.704337	0.756524	0.860571
MGK	RSV G2 vs Healthy	+	0.716937	0.773383	0.872793
cDC1	COVID G1 vs Healthy	+	0.733515	0.733515	0.88564
CD8+ TEMRA	RSV G2 vs Healthy	+	0.746304	0.91093	0.88564
Memory Treg	COVID G1 vs Healthy	+	0.746407	0.870808	0.88564
ISGlo Naive Treg	COVID G1 vs Healthy	+	0.746407	0.746407	0.88564
CD8+ TEMRA	COVID G3 vs Healthy	+	0.748141	0.91093	0.88564
Th1	COVID G3_S vs Healthy	+	0.753615	1	0.88564
AIM2hi Memory B	COVID G3_S vs Healthy	+	0.753615	0.879218	0.88564
DN2 B	COVID G3_S vs Healthy	-	0.753615	0.879218	0.88564
ISGhi CD14+ Monocyte	COVID G3_S vs Healthy	+	0.753848	0.753848	0.88564
Proliferating NK	COVID G3_S vs Healthy	+	0.753848	0.879489	0.88564
CD4+ TCM	RSV G3 vs Healthy	+	0.756524	0.756524	0.885687
CD8+ γδ T	COVID G3_S vs Healthy	-	0.762907	0.939622	0.890058
MGK	RSV G1 vs Healthy	-	0.773383	0.773383	0.899158
CD8+ TEMRA	COVID G1 vs Healthy	-	0.785544	0.91093	0.908522
ISGhi CD16+ Monocyte	COVID G1 vs Healthy	+	0.786845	0.786845	0.908522
CD8+ γδ T	RSV G2 vs Healthy	-	0.804157	0.939622	0.922173
MAIT	RSV G2 vs Healthy	-	0.804157	0.820081	0.922173
ISGlo TrB	COVID G2 vs Healthy	+	0.807584	0.820081	0.922953
HSPC	COVID G3 vs Healthy	-	0.81314	1	0.924655
MAIT	COVID G3 vs Healthy	-	0.820081	0.820081	0.924655
ISGlo Naive B	RSV G1 vs Healthy	-	0.820081	0.820081	0.924655
ISGlo TrB	COVID G3 vs Healthy	+	0.820081	0.820081	0.924655
ISGhi Naive CD8+ T	COVID G1 vs Healthy	+	0.82931	0.82931	0.928827
Cycling T	COVID G1 vs Healthy	+	0.82931	0.82931	0.928827
Plasmablast	COVID G2 vs Healthy	+	0.841671	1	0.939142
Th2	RSV G2 vs Healthy	+	0.848567	0.848567	0.939142
Th2	RSV G3 vs Healthy	-	0.848567	0.848567	0.939142
GZMKhi CD8+ T	RSV G3 vs Healthy	-	0.852495	1	0.939142
CD8- γδ T	RSV G3 vs Healthy	-	0.852495	0.950593	0.939142
Th22	COVID G3 vs Healthy	-	0.875348	0.875348	0.961166
Memory B	RSV G1 vs Healthy	+	0.879547	1	0.962632
ISGhi Tfh	COVID G1 vs Healthy	-	0.892173	0.892173	0.972448
Th1	COVID G2 vs Healthy	-	0.894305	1	0.972448
CD8+ TEMRA	COVID G2 vs Healthy	-	0.91093	0.91093	0.981318
Memory Treg	COVID G2 vs Healthy	-	0.911853	0.911853	0.981318
Proliferating T	COVID G1 vs Healthy	-	0.914013	0.914013	0.981318
Proliferating NK	COVID G1 vs Healthy	+	0.914145	0.914145	0.981318
Plasmablast	RSV G3 vs Healthy	-	0.923938	1	0.988673
DN2 B	COVID G3 vs Healthy	-	0.937482	0.937482	0.991923
AIM2hi Memory B	RSV G1 vs Healthy	+	0.937482	0.937482	0.991923
CD8+ γδ T	COVID G3 vs Healthy	+	0.939622	0.939622	0.991923
CD8+ γδ T	RSV G1 vs Healthy	-	0.939622	0.939622	0.991923
Erythroblast	RSV G2 vs Healthy	-	0.943469	0.943469	0.991923
HSPC	RSV G2 vs Healthy	+	0.948733	1	0.991923
CD8- γδ T	RSV G2 vs Healthy	-	0.950593	0.950593	0.991923
GZMKhi CD8+ T	RSV G2 vs Healthy	-	0.950593	1	0.991923
GZMKhi CD8+ T	COVID G3_S vs Healthy	+	0.965414	1	1
ISGlo Naive CD8+ T	COVID G3_S vs Healthy	-	0.965414	0.965414	1
Th17	RSV G1 vs Healthy	-	0.968744	0.974662	1
Th17	RSV G3 vs Healthy	-	0.974662	0.974662	1
CD56bright NK	COVID G3 vs Healthy	+	1	1	1
ISGlo CD14+ Monocyte	RSV G1 vs Healthy	+	1	1	1
Th1	RSV G1 vs Healthy	+	1	1	1
GZMKhi CD8+ T	COVID G1 vs Healthy	+	1	1	1
Memory B	RSV G2 vs Healthy	-	1	1	1
Plasmablast	COVID G3_S vs Healthy	-	1	1	1
ISGhi TrB	COVID G1 vs Healthy	+	1	1	1
Plasmablast	RSV G2 vs Healthy	-	1	1	1
HSPC	COVID G2 vs Healthy	+	1	1	1
ISGhi Naive CD4+ T	COVID G1 vs Healthy	+	1	1	1

## Sheet: All Comparisons
Annotation	Comparison	Direction	KW P-Value	KW p.adjust	Dunn Adjusted P-Value	MW P-Value	MW p.adjust
ISGhi Naive CD4+ T	COVID G2 vs Healthy	+	1.20795e-05	0.000479659	0.000485508	5.08494e-05	0.0310658
ISGhi Naive CD4+ T	RSV G3 vs Healthy	+	1.20795e-05	0.000479659	0.00457995	0.000762777	0.047952
ISGhi Naive CD4+ T	COVID G2 vs COVID G1	+	1.20795e-05	0.000479659	0.00457995	0.00122264	0.0513511
ISGhi Naive CD4+ T	COVID G3 vs Healthy	+	1.20795e-05	0.000479659	0.0139056	0.00455685	0.0874915
ISGhi Naive CD4+ T	RSV G2 vs Healthy	+	1.20795e-05	0.000479659	0.0139056	0.000543189	0.047952
ISGhi Naive CD4+ T	RSV G3 vs COVID G1	+	1.20795e-05	0.000479659	0.0139056	0.00332168	0.0744056
ISGhi Naive CD4+ T	COVID G3 vs COVID G1	+	1.20795e-05	0.000479659	0.0298697	0.028971	0.216317
ISGhi Naive CD4+ T	RSV G1 vs Healthy	+	1.20795e-05	0.000479659	0.0370001	0.00220248	0.0628415
ISGhi Naive CD4+ T	RSV G2 vs COVID G1	+	1.20795e-05	0.000479659	0.0370001	0.0020979	0.0626573
ISGhi Naive CD4+ T	COVID G3_S vs COVID G2	-	1.20795e-05	0.000479659	0.0661416	0.0197802	0.167199
ISGhi Naive CD4+ T	RSV G1 vs COVID G1	+	1.20795e-05	0.000479659	0.0762049	0.041958	0.263973
ISGhi Naive CD4+ T	RSV G3 vs COVID G3_S	+	1.20795e-05	0.000479659	0.106759	0.0424242	0.263973
ISGhi Naive CD4+ T	COVID G3_S vs COVID G3	-	1.20795e-05	0.000479659	0.135488	0.111111	0.432203
ISGhi Naive CD4+ T	RSV G2 vs COVID G3_S	+	1.20795e-05	0.000479659	0.196525	0.0424242	0.263973
ISGhi Naive CD4+ T	RSV G1 vs COVID G3_S	+	1.20795e-05	0.000479659	0.279479	0.031746	0.231884
ISGhi Naive CD4+ T	COVID G3_S vs Healthy	+	1.20795e-05	0.000479659	0.873593	0.275021	0.649746
ISGhi Naive CD4+ T	COVID G3_S vs COVID G1	-	1.20795e-05	0.000479659	0.873593	0.71049	0.923876
ISGhi Naive CD4+ T	RSV G1 vs COVID G2	-	1.20795e-05	0.000479659	0.873593	0.382676	0.741077
ISGhi Naive CD4+ T	RSV G2 vs COVID G2	-	1.20795e-05	0.000479659	0.873593	0.299119	0.659058
ISGhi Naive CD4+ T	RSV G1 vs COVID G3	-	1.20795e-05	0.000479659	0.873593	0.84127	0.981098
ISGhi Naive CD4+ T	RSV G3 vs RSV G1	+	1.20795e-05	0.000479659	0.873593	0.431818	0.759902
ISGhi Naive CD4+ T	RSV G3 vs RSV G2	+	1.20795e-05	0.000479659	0.873593	0.382867	0.741077
ISGhi Naive CD4+ T	RSV G2 vs COVID G3	-	1.20795e-05	0.000479659	0.874255	0.530303	0.819571
ISGhi Naive CD4+ T	COVID G1 vs Healthy	+	1.20795e-05	0.000479659	0.94545	1	1
ISGhi Naive CD4+ T	COVID G3 vs COVID G2	+	1.20795e-05	0.000479659	0.94545	0.798966	0.969101
ISGhi Naive CD4+ T	RSV G3 vs COVID G2	+	1.20795e-05	0.000479659	0.94545	0.901802	1
ISGhi Naive CD4+ T	RSV G2 vs RSV G1	-	1.20795e-05	0.000479659	0.94545	0.638889	0.885223
ISGhi Naive CD4+ T	RSV G3 vs COVID G3	-	1.20795e-05	0.000479659	0.993916	0.876263	0.991691
ISGhi Naive Treg	COVID G2 vs Healthy	+	2.81952e-05	0.000479659	0.000243229	2.89178e-05	0.0310658
ISGhi Naive Treg	RSV G3 vs Healthy	+	2.81952e-05	0.000479659	0.00881004	0.00169584	0.0599793
ISGhi Naive Treg	RSV G2 vs Healthy	+	2.81952e-05	0.000479659	0.0131571	0.000980855	0.047952
ISGhi Naive Treg	COVID G2 vs COVID G1	+	2.81952e-05	0.000479659	0.0153234	0.00192545	0.0626573
ISGhi Naive Treg	COVID G3 vs Healthy	+	2.81952e-05	0.000479659	0.0209271	0.0120202	0.134517
ISGhi Naive Treg	RSV G1 vs Healthy	+	2.81952e-05	0.000479659	0.038583	0.00133373	0.0527217
ISGhi Naive Treg	RSV G3 vs COVID G1	+	2.81952e-05	0.000479659	0.0609868	0.0134664	0.142511
ISGhi Naive Treg	COVID G3_S vs COVID G2	-	2.81952e-05	0.000479659	0.0609868	0.017959	0.166538
ISGhi Naive Treg	RSV G2 vs COVID G1	+	2.81952e-05	0.000479659	0.0869481	0.0141797	0.148886
ISGhi Naive Treg	COVID G3 vs COVID G1	+	2.81952e-05	0.000479659	0.110299	0.0762731	0.359688
ISGhi Naive Treg	RSV G3 vs COVID G3_S	+	2.81952e-05	0.000479659	0.126019	0.04522	0.275265
ISGhi Naive Treg	RSV G1 vs COVID G1	+	2.81952e-05	0.000479659	0.154009	0.0796534	0.369889
ISGhi Naive Treg	RSV G2 vs COVID G3_S	+	2.81952e-05	0.000479659	0.154009	0.0719514	0.347851
ISGhi Naive Treg	COVID G3_S vs COVID G3	-	2.81952e-05	0.000479659	0.161764	0.170609	0.534534
ISGhi Naive Treg	RSV G1 vs COVID G3_S	+	2.81952e-05	0.000479659	0.226374	0.176098	0.542833
ISGhi Naive Treg	COVID G1 vs Healthy	+	2.81952e-05	0.000479659	0.750618	0.240786	0.623975
ISGhi Naive Treg	RSV G1 vs COVID G2	+	2.81952e-05	0.000479659	0.874908	0.574337	0.845465
ISGhi Naive Treg	COVID G3_S vs Healthy	+	2.81952e-05	0.000479659	0.897854	0.456644	0.772958
ISGhi Naive Treg	RSV G2 vs COVID G2	-	2.81952e-05	0.000479659	0.897854	0.482416	0.800905
ISGhi Naive Treg	COVID G3_S vs COVID G1	+	2.81952e-05	0.000479659	0.970891	1	1
ISGhi Naive Treg	COVID G3 vs COVID G2	+	2.81952e-05	0.000479659	0.970891	1	1
ISGhi Naive Treg	RSV G3 vs COVID G2	-	2.81952e-05	0.000479659	0.970891	0.650353	0.889191
ISGhi Naive Treg	RSV G1 vs COVID G3	-	2.81952e-05	0.000479659	0.970891	0.84127	0.981098
ISGhi Naive Treg	RSV G2 vs COVID G3	-	2.81952e-05	0.000479659	0.970891	0.638889	0.885223
ISGhi Naive Treg	RSV G3 vs COVID G3	-	2.81952e-05	0.000479659	0.970891	1	1
ISGhi Naive Treg	RSV G2 vs RSV G1	-	2.81952e-05	0.000479659	0.970891	0.755051	0.939618
ISGhi Naive Treg	RSV G3 vs RSV G1	-	2.81952e-05	0.000479659	0.970891	0.343434	0.696193
ISGhi Naive Treg	RSV G3 vs RSV G2	+	2.81952e-05	0.000479659	0.970891	0.804779	0.969101
ISGhi CD16+ Monocyte	COVID G2 vs Healthy	+	2.99787e-05	0.000479659	0.00102431	0.00025452	0.0427209
ISGhi CD16+ Monocyte	RSV G2 vs Healthy	+	2.99787e-05	0.000479659	0.00102431	0.000222798	0.0427209
ISGhi CD16+ Monocyte	RSV G2 vs COVID G1	+	2.99787e-05	0.000479659	0.00973825	0.000699301	0.047952
ISGhi CD16+ Monocyte	COVID G2 vs COVID G1	+	2.99787e-05	0.000479659	0.0154829	0.00399939	0.0838649
ISGhi CD16+ Monocyte	COVID G3 vs Healthy	+	2.99787e-05	0.000479659	0.037558	0.00952117	0.116137
ISGhi CD16+ Monocyte	RSV G1 vs Healthy	+	2.99787e-05	0.000479659	0.037558	0.00364886	0.0803558
ISGhi CD16+ Monocyte	RSV G3 vs Healthy	+	2.99787e-05	0.000479659	0.037558	0.00738149	0.102275
ISGhi CD16+ Monocyte	RSV G2 vs COVID G3_S	+	2.99787e-05	0.000479659	0.0452273	0.00606061	0.0950843
ISGhi CD16+ Monocyte	RSV G1 vs COVID G1	+	2.99787e-05	0.000479659	0.0831187	0.018981	0.166557
ISGhi CD16+ Monocyte	COVID G3_S vs COVID G2	-	2.99787e-05	0.000479659	0.0831187	0.0417582	0.263973
ISGhi CD16+ Monocyte	COVID G3 vs COVID G1	+	2.99787e-05	0.000479659	0.0892121	0.028971	0.216317
ISGhi CD16+ Monocyte	RSV G3 vs COVID G1	+	2.99787e-05	0.000479659	0.0903899	0.0637735	0.323255
ISGhi CD16+ Monocyte	RSV G1 vs COVID G3_S	+	2.99787e-05	0.000479659	0.202546	0.0634921	0.323232
ISGhi CD16+ Monocyte	COVID G3_S vs COVID G3	-	2.99787e-05	0.000479659	0.213791	0.190476	0.554895
ISGhi CD16+ Monocyte	RSV G3 vs COVID G3_S	+	2.99787e-05	0.000479659	0.243786	0.0882469	0.382593
ISGhi CD16+ Monocyte	RSV G3 vs RSV G2	-	2.99787e-05	0.000479659	0.443317	0.259324	0.638496
ISGhi CD16+ Monocyte	RSV G2 vs COVID G3	+	2.99787e-05	0.000479659	0.684705	0.431818	0.759902
ISGhi CD16+ Monocyte	RSV G2 vs RSV G1	+	2.99787e-05	0.000479659	0.711953	0.20202	0.571611
ISGhi CD16+ Monocyte	RSV G2 vs COVID G2	-	2.99787e-05	0.000479659	0.734043	0.710844	0.923876
ISGhi CD16+ Monocyte	RSV G3 vs COVID G2	-	2.99787e-05	0.000479659	0.734043	0.482416	0.800905
ISGhi CD16+ Monocyte	COVID G1 vs Healthy	+	2.99787e-05	0.000479659	0.881939	0.786845	0.96177
ISGhi CD16+ Monocyte	COVID G3_S vs Healthy	+	2.99787e-05	0.000479659	0.881939	0.443515	0.764211
ISGhi CD16+ Monocyte	COVID G3 vs COVID G2	-	2.99787e-05	0.000479659	0.881939	0.646089	0.889191
ISGhi CD16+ Monocyte	RSV G1 vs COVID G2	-	2.99787e-05	0.000479659	0.881939	0.721396	0.930477
ISGhi CD16+ Monocyte	RSV G3 vs COVID G3	-	2.99787e-05	0.000479659	0.881939	0.755051	0.939618
ISGhi CD16+ Monocyte	RSV G3 vs RSV G1	+	2.99787e-05	0.000479659	0.881939	1	1
ISGhi CD16+ Monocyte	COVID G3_S vs COVID G1	-	2.99787e-05	0.000479659	0.907978	1	1
ISGhi CD16+ Monocyte	RSV G1 vs COVID G3	-	2.99787e-05	0.000479659	0.947432	1	1
ISGhi Naive CD8+ T	COVID G2 vs Healthy	+	0.000214161	0.00256994	0.0042288	0.000182763	0.0427209
ISGhi Naive CD8+ T	RSV G3 vs Healthy	+	0.000214161	0.00256994	0.0114595	0.000543189	0.047952
ISGhi Naive CD8+ T	COVID G2 vs COVID G1	+	0.000214161	0.00256994	0.0114595	0.00199208	0.0626573
ISGhi Naive CD8+ T	RSV G2 vs Healthy	+	0.000214161	0.00256994	0.0195645	0.000543189	0.047952
ISGhi Naive CD8+ T	RSV G3 vs COVID G1	+	0.000214161	0.00256994	0.0195645	0.0020979	0.0626573
ISGhi Naive CD8+ T	RSV G2 vs COVID G1	+	0.000214161	0.00256994	0.0370341	0.00524476	0.0903712
ISGhi Naive CD8+ T	COVID G3 vs Healthy	+	0.000214161	0.00256994	0.0474092	0.0849092	0.372935
ISGhi Naive CD8+ T	COVID G3 vs COVID G1	+	0.000214161	0.00256994	0.0772341	0.18981	0.554895
ISGhi Naive CD8+ T	RSV G1 vs Healthy	+	0.000214161	0.00256994	0.161791	0.0386572	0.261082
ISGhi Naive CD8+ T	RSV G1 vs COVID G1	+	0.000214161	0.00256994	0.216613	0.146853	0.496819
ISGhi Naive CD8+ T	COVID G3_S vs COVID G2	-	0.000214161	0.00256994	0.332634	0.0417582	0.263973
ISGhi Naive CD8+ T	RSV G3 vs COVID G3_S	+	0.000214161	0.00256994	0.332634	0.0424242	0.263973
ISGhi Naive CD8+ T	RSV G2 vs COVID G3_S	+	0.000214161	0.00256994	0.453051	0.0727273	0.349091
ISGhi Naive CD8+ T	COVID G3_S vs COVID G3	-	0.000214161	0.00256994	0.560803	0.555556	0.82963
ISGhi Naive CD8+ T	COVID G3_S vs Healthy	+	0.000214161	0.00256994	0.591577	0.0985798	0.408924
ISGhi Naive CD8+ T	COVID G3_S vs COVID G1	+	0.000214161	0.00256994	0.62588	0.26014	0.638496
ISGhi Naive CD8+ T	RSV G1 vs COVID G2	+	0.000214161	0.00256994	0.635063	0.442146	0.763908
ISGhi Naive CD8+ T	RSV G3 vs RSV G1	-	0.000214161	0.00256994	0.635063	0.431818	0.759902
ISGhi Naive CD8+ T	RSV G1 vs COVID G3_S	+	0.000214161	0.00256994	0.76517	0.730159	0.934603
ISGhi Naive CD8+ T	RSV G2 vs RSV G1	-	0.000214161	0.00256994	0.765645	0.530303	0.819571
ISGhi Naive CD8+ T	RSV G1 vs COVID G3	-	0.000214161	0.00256994	0.859489	1	1
ISGhi Naive CD8+ T	COVID G3 vs COVID G2	+	0.000214161	0.00256994	0.935806	0.574337	0.845465
ISGhi Naive CD8+ T	RSV G3 vs COVID G3	-	0.000214161	0.00256994	0.935806	0.638889	0.885223
ISGhi Naive CD8+ T	RSV G3 vs RSV G2	+	0.000214161	0.00256994	0.935806	0.710373	0.923876
ISGhi Naive CD8+ T	RSV G2 vs COVID G2	-	0.000214161	0.00256994	0.956245	0.650353	0.889191
ISGhi Naive CD8+ T	RSV G3 vs COVID G2	+	0.000214161	0.00256994	0.956245	0.967135	1
ISGhi Naive CD8+ T	RSV G2 vs COVID G3	-	0.000214161	0.00256994	0.956245	0.638889	0.885223
ISGhi Naive CD8+ T	COVID G1 vs Healthy	+	0.000214161	0.00256994	0.99341	0.82931	0.981098
ISGhi Tfh	COVID G2 vs Healthy	+	0.000316954	0.00304276	0.00718584	0.00103507	0.0479699
ISGhi Tfh	RSV G2 vs Healthy	+	0.000316954	0.00304276	0.00718584	0.000290909	0.0427209
ISGhi Tfh	COVID G2 vs COVID G1	+	0.000316954	0.00304276	0.0156859	0.00674145	0.0993999
ISGhi Tfh	RSV G2 vs COVID G1	+	0.000316954	0.00304276	0.0156859	0.000998029	0.047952
ISGhi Tfh	RSV G3 vs Healthy	+	0.000316954	0.00304276	0.0208277	0.00682852	0.0993999
ISGhi Tfh	RSV G3 vs COVID G1	+	0.000316954	0.00304276	0.0508562	0.0122106	0.134517
ISGhi Tfh	RSV G1 vs Healthy	+	0.000316954	0.00304276	0.0708018	0.00370689	0.0803558
ISGhi Tfh	RSV G1 vs COVID G1	+	0.000316954	0.00304276	0.116713	0.0228044	0.185424
ISGhi Tfh	COVID G3 vs Healthy	+	0.000316954	0.00304276	0.15874	0.146082	0.496819
ISGhi Tfh	COVID G3 vs COVID G1	+	0.000316954	0.00304276	0.227097	0.15688	0.514261
ISGhi Tfh	COVID G3_S vs Healthy	+	0.000316954	0.00304276	0.341695	0.12663	0.462731
ISGhi Tfh	COVID G3_S vs COVID G1	+	0.000316954	0.00304276	0.411527	0.117659	0.440483
ISGhi Tfh	RSV G2 vs COVID G3_S	+	0.000316954	0.00304276	0.528972	0.412121	0.759902
ISGhi Tfh	COVID G3_S vs COVID G2	-	0.000316954	0.00304276	0.646705	0.274739	0.649746
ISGhi Tfh	RSV G2 vs COVID G3	+	0.000316954	0.00304276	0.646705	0.876263	0.991691
ISGhi Tfh	COVID G3 vs COVID G2	-	0.000316954	0.00304276	0.776892	0.460322	0.777226
ISGhi Tfh	RSV G3 vs COVID G3_S	+	0.000316954	0.00304276	0.776892	0.255756	0.638496
ISGhi Tfh	RSV G3 vs COVID G3	+	0.000316954	0.00304276	0.83492	0.80721	0.969101
ISGhi Tfh	RSV G1 vs COVID G3_S	+	0.000316954	0.00304276	0.83492	1	1
ISGhi Tfh	RSV G2 vs RSV G1	-	0.000316954	0.00304276	0.83492	0.343434	0.696193
ISGhi Tfh	RSV G3 vs RSV G2	-	0.000316954	0.00304276	0.840541	1	1
ISGhi Tfh	RSV G1 vs COVID G2	+	0.000316954	0.00304276	0.875745	0.798966	0.969101
ISGhi Tfh	RSV G2 vs COVID G2	-	0.000316954	0.00304276	0.875745	0.836945	0.981098
ISGhi Tfh	RSV G1 vs COVID G3	+	0.000316954	0.00304276	0.875745	1	1
ISGhi Tfh	COVID G3_S vs COVID G3	-	0.000316954	0.00304276	0.908261	0.622753	0.885223
ISGhi Tfh	RSV G3 vs COVID G2	-	0.000316954	0.00304276	0.910539	0.498774	0.808071
ISGhi Tfh	RSV G3 vs RSV G1	-	0.000316954	0.00304276	0.910539	0.530303	0.819571
ISGhi Tfh	COVID G1 vs Healthy	-	0.000316954	0.00304276	0.961726	0.892173	1
Proliferating T	RSV G1 vs Healthy	+	0.000417455	0.00310984	0.00666923	0.00218282	0.0628415
Proliferating T	RSV G1 vs COVID G1	+	0.000417455	0.00310984	0.00666923	0.000999001	0.047952
Proliferating T	COVID G3_S vs Healthy	+	0.000417455	0.00310984	0.0441657	0.00803238	0.106886
Proliferating T	COVID G3_S vs COVID G1	+	0.000417455	0.00310984	0.0441657	0.0027972	0.0659551
Proliferating T	RSV G2 vs Healthy	+	0.000417455	0.00310984	0.0502196	0.0155773	0.157413
Proliferating T	RSV G3 vs Healthy	+	0.000417455	0.00310984	0.0502196	0.013053	0.139488
Proliferating T	RSV G2 vs COVID G1	+	0.000417455	0.00310984	0.0502196	0.0229021	0.185424
Proliferating T	RSV G3 vs COVID G1	+	0.000417455	0.00310984	0.0539791	0.00786713	0.105734
Proliferating T	RSV G1 vs COVID G3	+	0.000417455	0.00310984	0.0549447	0.0555556	0.298667
Proliferating T	RSV G1 vs COVID G2	+	0.000417455	0.00310984	0.0670624	0.00937298	0.116137
Proliferating T	COVID G3_S vs COVID G3	+	0.000417455	0.00310984	0.191647	0.111111	0.432203
Proliferating T	COVID G2 vs Healthy	+	0.000417455	0.00310984	0.192276	0.0485042	0.278588
Proliferating T	COVID G2 vs COVID G1	+	0.000417455	0.00310984	0.194565	0.0596634	0.310805
Proliferating T	COVID G3_S vs COVID G2	+	0.000417455	0.00310984	0.242648	0.0582418	0.309619
Proliferating T	RSV G2 vs COVID G3	+	0.000417455	0.00310984	0.311064	0.267677	0.641279
Proliferating T	RSV G3 vs COVID G3	+	0.000417455	0.00310984	0.327244	0.267677	0.641279
Proliferating T	RSV G3 vs RSV G1	-	0.000417455	0.00310984	0.352105	0.0732323	0.350264
Proliferating T	RSV G2 vs RSV G1	-	0.000417455	0.00310984	0.370419	0.267677	0.641279
Proliferating T	RSV G2 vs COVID G2	+	0.000417455	0.00310984	0.416337	0.195562	0.561615
Proliferating T	RSV G3 vs COVID G2	+	0.000417455	0.00310984	0.446655	0.261411	0.638496
Proliferating T	COVID G3 vs COVID G1	+	0.000417455	0.00310984	0.562352	0.518482	0.819571
Proliferating T	COVID G3 vs Healthy	+	0.000417455	0.00310984	0.61142	0.478244	0.797468
Proliferating T	RSV G3 vs COVID G3_S	-	0.000417455	0.00310984	0.61142	0.648485	0.889191
Proliferating T	RSV G2 vs COVID G3_S	+	0.000417455	0.00310984	0.63094	0.648485	0.889191
Proliferating T	COVID G3 vs COVID G2	-	0.000417455	0.00310984	0.643608	0.442146	0.763908
Proliferating T	RSV G1 vs COVID G3_S	+	0.000417455	0.00310984	0.696512	0.285714	0.649746
Proliferating T	COVID G1 vs Healthy	-	0.000417455	0.00310984	0.853996	0.914013	1
Proliferating T	RSV G3 vs RSV G2	-	0.000417455	0.00310984	0.944491	0.901515	1
ISGhi TrB	COVID G2 vs Healthy	+	0.000453518	0.00310984	0.022807	0.00166913	0.0599793
ISGhi TrB	RSV G3 vs Healthy	+	0.000453518	0.00310984	0.0254896	0.00381066	0.0812941
ISGhi TrB	RSV G2 vs Healthy	+	0.000453518	0.00310984	0.0325125	0.00466753	0.0880709
ISGhi TrB	COVID G2 vs COVID G1	+	0.000453518	0.00310984	0.0325125	0.00902906	0.114482
ISGhi TrB	RSV G1 vs Healthy	+	0.000453518	0.00310984	0.0325529	0.00561223	0.0937149
ISGhi TrB	RSV G3 vs COVID G1	+	0.000453518	0.00310984	0.0325529	0.0180911	0.166538
ISGhi TrB	COVID G3 vs Healthy	+	0.000453518	0.00310984	0.0395379	0.00438915	0.0874915
ISGhi TrB	RSV G2 vs COVID G1	+	0.000453518	0.00310984	0.0395379	0.0180911	0.166538
ISGhi TrB	RSV G1 vs COVID G1	+	0.000453518	0.00310984	0.0462388	0.015232	0.156181
ISGhi TrB	COVID G3 vs COVID G1	+	0.000453518	0.00310984	0.062383	0.015232	0.156181
ISGhi TrB	RSV G3 vs COVID G3_S	+	0.000453518	0.00310984	0.393036	0.129695	0.467319
ISGhi TrB	COVID G3_S vs COVID G2	-	0.000453518	0.00310984	0.417422	0.1819	0.554895
ISGhi TrB	RSV G1 vs COVID G3_S	+	0.000453518	0.00310984	0.417422	0.285714	0.649746
ISGhi TrB	RSV G2 vs COVID G3_S	+	0.000453518	0.00310984	0.417422	0.255756	0.638496
ISGhi TrB	COVID G3_S vs COVID G3	-	0.000453518	0.00310984	0.455835	0.285714	0.649746
ISGhi TrB	COVID G3_S vs Healthy	+	0.000453518	0.00310984	0.631723	0.338072	0.696193
ISGhi TrB	COVID G3_S vs COVID G1	+	0.000453518	0.00310984	0.677603	0.302205	0.662584
ISGhi TrB	COVID G1 vs Healthy	+	0.000453518	0.00310984	0.99083	1	1
ISGhi TrB	COVID G3 vs COVID G2	-	0.000453518	0.00310984	0.99083	0.878798	0.991691
ISGhi TrB	RSV G1 vs COVID G2	-	0.000453518	0.00310984	0.99083	1	1
ISGhi TrB	RSV G2 vs COVID G2	-	0.000453518	0.00310984	0.99083	1	1
ISGhi TrB	RSV G3 vs COVID G2	+	0.000453518	0.00310984	0.99083	0.79976	0.969101
ISGhi TrB	RSV G1 vs COVID G3	+	0.000453518	0.00310984	0.99083	0.690476	0.919722
ISGhi TrB	RSV G2 vs COVID G3	+	0.000453518	0.00310984	0.99083	0.876263	0.991691
ISGhi TrB	RSV G3 vs COVID G3	+	0.000453518	0.00310984	0.99083	0.755051	0.939618
ISGhi TrB	RSV G2 vs RSV G1	+	0.000453518	0.00310984	0.99083	0.876263	0.991691
ISGhi TrB	RSV G3 vs RSV G1	+	0.000453518	0.00310984	0.99083	1	1
ISGhi TrB	RSV G3 vs RSV G2	+	0.000453518	0.00310984	0.99083	0.654365	0.893768
ISGlo CD16+ Monocyte	COVID G2 vs Healthy	-	0.000691859	0.00375204	0.00796835	0.000970591	0.047952
ISGlo CD16+ Monocyte	COVID G3_S vs Healthy	-	0.000691859	0.00375204	0.00796835	0.000334169	0.0427209
ISGlo CD16+ Monocyte	COVID G3 vs Healthy	-	0.000691859	0.00375204	0.0320506	0.0121491	0.134517
ISGlo CD16+ Monocyte	RSV G3 vs Healthy	-	0.000691859	0.00375204	0.0323548	0.00250214	0.0628415
ISGlo CD16+ Monocyte	COVID G3_S vs COVID G1	-	0.000691859	0.00375204	0.0383681	0.0027972	0.0659551
ISGlo CD16+ Monocyte	COVID G2 vs COVID G1	-	0.000691859	0.00375204	0.125657	0.0172778	0.166458
ISGlo CD16+ Monocyte	COVID G3 vs COVID G1	-	0.000691859	0.00375204	0.146954	0.0826981	0.369889
ISGlo CD16+ Monocyte	RSV G2 vs Healthy	-	0.000691859	0.00375204	0.157971	0.033724	0.239815
ISGlo CD16+ Monocyte	RSV G3 vs COVID G1	-	0.000691859	0.00375204	0.182896	0.0164336	0.161217
ISGlo CD16+ Monocyte	RSV G1 vs COVID G3_S	+	0.000691859	0.00375204	0.182896	0.139983	0.492511
ISGlo CD16+ Monocyte	RSV G2 vs COVID G3_S	+	0.000691859	0.00375204	0.239985	0.129695	0.467319
ISGlo CD16+ Monocyte	RSV G1 vs Healthy	-	0.000691859	0.00375204	0.377066	0.248804	0.637337
ISGlo CD16+ Monocyte	RSV G2 vs COVID G1	-	0.000691859	0.00375204	0.461875	0.252273	0.637337
ISGlo CD16+ Monocyte	COVID G3_S vs COVID G2	-	0.000691859	0.00375204	0.461875	0.17033	0.534534
ISGlo CD16+ Monocyte	RSV G1 vs COVID G2	+	0.000691859	0.00375204	0.461875	0.328378	0.68531
ISGlo CD16+ Monocyte	RSV G1 vs COVID G3	+	0.000691859	0.00375204	0.461875	0.397615	0.759083
ISGlo CD16+ Monocyte	RSV G3 vs COVID G3_S	+	0.000691859	0.00375204	0.461875	0.129695	0.467319
ISGlo CD16+ Monocyte	RSV G2 vs COVID G3	+	0.000691859	0.00375204	0.489327	0.252279	0.637337
ISGlo CD16+ Monocyte	RSV G3 vs RSV G1	-	0.000691859	0.00375204	0.499611	0.290307	0.651463
ISGlo CD16+ Monocyte	RSV G2 vs COVID G2	+	0.000691859	0.00375204	0.561226	0.384457	0.742399
ISGlo CD16+ Monocyte	COVID G1 vs Healthy	-	0.000691859	0.00375204	0.575152	0.215114	0.592933
ISGlo CD16+ Monocyte	RSV G1 vs COVID G1	+	0.000691859	0.00375204	0.575152	0.518482	0.819571
ISGlo CD16+ Monocyte	COVID G3_S vs COVID G3	-	0.000691859	0.00375204	0.575152	0.900865	1
ISGlo CD16+ Monocyte	RSV G3 vs RSV G2	-	0.000691859	0.00375204	0.575152	0.564871	0.83703
ISGlo CD16+ Monocyte	COVID G3 vs COVID G2	-	0.000691859	0.00375204	0.776397	0.492978	0.803593
ISGlo CD16+ Monocyte	RSV G3 vs COVID G3	+	0.000691859	0.00375204	0.776397	0.743596	0.939618
ISGlo CD16+ Monocyte	RSV G2 vs RSV G1	-	0.000691859	0.00375204	0.776397	0.93517	1
ISGlo CD16+ Monocyte	RSV G3 vs COVID G2	-	0.000691859	0.00375204	0.95423	0.710844	0.923876
ISGhi CD14+ Monocyte	RSV G2 vs Healthy	+	0.000715245	0.00375204	0.00142684	0.000229221	0.0427209
ISGhi CD14+ Monocyte	COVID G2 vs Healthy	+	0.000715245	0.00375204	0.0341411	0.0073773	0.102275
ISGhi CD14+ Monocyte	RSV G2 vs COVID G1	+	0.000715245	0.00375204	0.0393465	0.0020979	0.0626573
ISGhi CD14+ Monocyte	RSV G3 vs Healthy	+	0.000715245	0.00375204	0.0496664	0.00630361	0.0951916
ISGhi CD14+ Monocyte	COVID G3 vs Healthy	+	0.000715245	0.00375204	0.0497448	0.0121491	0.134517
ISGhi CD14+ Monocyte	RSV G2 vs COVID G3_S	+	0.000715245	0.00375204	0.0580676	0.0242424	0.193939
ISGhi CD14+ Monocyte	RSV G1 vs Healthy	+	0.000715245	0.00375204	0.181076	0.00970545	0.116137
ISGhi CD14+ Monocyte	COVID G2 vs COVID G1	+	0.000715245	0.00375204	0.271388	0.0949051	0.399851
ISGhi CD14+ Monocyte	COVID G3 vs COVID G1	+	0.000715245	0.00375204	0.271388	0.0829171	0.369889
ISGhi CD14+ Monocyte	RSV G3 vs COVID G1	+	0.000715245	0.00375204	0.273712	0.141608	0.494997
ISGhi CD14+ Monocyte	COVID G3_S vs COVID G2	-	0.000715245	0.00375204	0.273712	0.132967	0.472772
ISGhi CD14+ Monocyte	COVID G3_S vs COVID G3	-	0.000715245	0.00375204	0.273712	0.111111	0.432203
ISGhi CD14+ Monocyte	RSV G3 vs COVID G3_S	+	0.000715245	0.00375204	0.273712	0.230303	0.612925
ISGhi CD14+ Monocyte	RSV G2 vs COVID G2	+	0.000715245	0.00375204	0.309683	0.22684	0.612194
ISGhi CD14+ Monocyte	RSV G2 vs RSV G1	+	0.000715245	0.00375204	0.320045	0.0479798	0.277952
ISGhi CD14+ Monocyte	RSV G1 vs COVID G1	+	0.000715245	0.00375204	0.39455	0.23976	0.623975
ISGhi CD14+ Monocyte	RSV G1 vs COVID G3_S	+	0.000715245	0.00375204	0.39455	0.412698	0.759902
ISGhi CD14+ Monocyte	RSV G3 vs RSV G2	-	0.000715245	0.00375204	0.39455	0.317599	0.678622
ISGhi CD14+ Monocyte	COVID G1 vs Healthy	+	0.000715245	0.00375204	0.530691	0.305734	0.667236
ISGhi CD14+ Monocyte	RSV G2 vs COVID G3	+	0.000715245	0.00375204	0.566192	0.343434	0.696193
ISGhi CD14+ Monocyte	COVID G3_S vs Healthy	+	0.000715245	0.00375204	0.826212	0.753848	0.939618
ISGhi CD14+ Monocyte	RSV G1 vs COVID G3	-	0.000715245	0.00375204	0.826212	0.547619	0.828829
ISGhi CD14+ Monocyte	COVID G3_S vs COVID G1	+	0.000715245	0.00375204	0.866899	0.93986	1
ISGhi CD14+ Monocyte	COVID G3 vs COVID G2	+	0.000715245	0.00375204	0.866899	0.798966	0.969101
ISGhi CD14+ Monocyte	RSV G1 vs COVID G2	-	0.000715245	0.00375204	0.866899	0.442146	0.763908
ISGhi CD14+ Monocyte	RSV G3 vs COVID G3	+	0.000715245	0.00375204	0.866899	1	1
ISGhi CD14+ Monocyte	RSV G3 vs RSV G1	+	0.000715245	0.00375204	0.866899	1	1
ISGhi CD14+ Monocyte	RSV G3 vs COVID G2	+	0.000715245	0.00375204	0.889035	0.836945	0.981098
ISGhi CD163+ Monocyte	COVID G3_S vs Healthy	+	0.000781676	0.00375204	0.00140768	0.000596028	0.047952
ISGhi CD163+ Monocyte	COVID G3_S vs COVID G2	+	0.000781676	0.00375204	0.00305914	0.00233455	0.0628415
ISGhi CD163+ Monocyte	COVID G3_S vs COVID G1	+	0.000781676	0.00375204	0.00940097	0.00450693	0.0874915
ISGhi CD163+ Monocyte	RSV G2 vs Healthy	+	0.000781676	0.00375204	0.0123229	0.00160205	0.0598097
ISGhi CD163+ Monocyte	RSV G3 vs COVID G3_S	-	0.000781676	0.00375204	0.0123229	0.00901992	0.114482
ISGhi CD163+ Monocyte	RSV G2 vs COVID G2	+	0.000781676	0.00375204	0.0385513	0.00839424	0.110075
ISGhi CD163+ Monocyte	RSV G1 vs COVID G3_S	-	0.000781676	0.00375204	0.0822006	0.019451	0.166557
ISGhi CD163+ Monocyte	RSV G2 vs COVID G1	+	0.000781676	0.00375204	0.0912802	0.0357746	0.249593
ISGhi CD163+ Monocyte	COVID G3_S vs COVID G3	+	0.000781676	0.00375204	0.0912802	0.019451	0.166557
ISGhi CD163+ Monocyte	RSV G3 vs RSV G2	-	0.000781676	0.00375204	0.136821	0.049973	0.284592
ISGhi CD163+ Monocyte	COVID G3 vs Healthy	+	0.000781676	0.00375204	0.306132	0.0881193	0.382593
ISGhi CD163+ Monocyte	RSV G1 vs Healthy	+	0.000781676	0.00375204	0.364505	0.129541	0.467319
ISGhi CD163+ Monocyte	RSV G2 vs COVID G3_S	-	0.000781676	0.00375204	0.364505	0.00606061	0.0950843
ISGhi CD163+ Monocyte	COVID G3 vs COVID G2	+	0.000781676	0.00375204	0.41414	0.17473	0.5411
ISGhi CD163+ Monocyte	RSV G2 vs RSV G1	+	0.000781676	0.00375204	0.463967	0.326453	0.68531
ISGhi CD163+ Monocyte	RSV G1 vs COVID G2	+	0.000781676	0.00375204	0.482044	0.215291	0.592933
ISGhi CD163+ Monocyte	RSV G2 vs COVID G3	+	0.000781676	0.00375204	0.523943	0.326453	0.68531
ISGhi CD163+ Monocyte	COVID G3 vs COVID G1	+	0.000781676	0.00375204	0.555746	0.30132	0.661722
ISGhi CD163+ Monocyte	RSV G3 vs COVID G3	-	0.000781676	0.00375204	0.624592	0.488051	0.800905
ISGhi CD163+ Monocyte	RSV G1 vs COVID G1	+	0.000781676	0.00375204	0.628391	0.554767	0.82963
ISGhi CD163+ Monocyte	RSV G3 vs Healthy	+	0.000781676	0.00375204	0.630963	0.429138	0.759902
ISGhi CD163+ Monocyte	COVID G1 vs Healthy	+	0.000781676	0.00375204	0.632307	0.407716	0.759902
ISGhi CD163+ Monocyte	RSV G3 vs RSV G1	-	0.000781676	0.00375204	0.632307	0.603023	0.871465
ISGhi CD163+ Monocyte	RSV G3 vs COVID G2	-	0.000781676	0.00375204	0.780619	0.52562	0.819571
ISGhi CD163+ Monocyte	COVID G2 vs COVID G1	-	0.000781676	0.00375204	0.806351	0.832367	0.981098
ISGhi CD163+ Monocyte	COVID G2 vs Healthy	+	0.000781676	0.00375204	0.810491	0.632831	0.885223
ISGhi CD163+ Monocyte	RSV G1 vs COVID G3	-	0.000781676	0.00375204	0.918314	1	1
ISGhi CD163+ Monocyte	RSV G3 vs COVID G1	-	0.000781676	0.00375204	0.928582	1	1
Proliferating NK	COVID G2 vs Healthy	+	0.00155752	0.00679644	0.0118757	0.000826965	0.047952
Proliferating NK	COVID G3 vs Healthy	+	0.00155752	0.00679644	0.0427303	0.00478361	0.0880709
Proliferating NK	COVID G2 vs COVID G1	+	0.00155752	0.00679644	0.0427303	0.00769863	0.104515
Proliferating NK	RSV G1 vs Healthy	+	0.00155752	0.00679644	0.0514783	0.00609016	0.0950843
Proliferating NK	COVID G3 vs COVID G1	+	0.00155752	0.00679644	0.0642552	0.018981	0.166557
Proliferating NK	RSV G1 vs COVID G1	+	0.00155752	0.00679644	0.084943	0.028971	0.216317
Proliferating NK	RSV G2 vs COVID G2	-	0.00155752	0.00679644	0.084943	0.0449313	0.275265
Proliferating NK	RSV G2 vs COVID G3	-	0.00155752	0.00679644	0.104813	0.0479798	0.277952
Proliferating NK	RSV G2 vs RSV G1	-	0.00155752	0.00679644	0.156536	0.0479798	0.277952
Proliferating NK	RSV G3 vs COVID G2	-	0.00155752	0.00679644	0.161332	0.0283401	0.216317
Proliferating NK	COVID G3_S vs COVID G2	-	0.00155752	0.00679644	0.176496	0.261538	0.638496
Proliferating NK	COVID G3_S vs COVID G3	-	0.00155752	0.00679644	0.176496	0.190476	0.554895
Proliferating NK	RSV G3 vs COVID G3	-	0.00155752	0.00679644	0.176496	0.0176768	0.166458
Proliferating NK	RSV G3 vs RSV G1	-	0.00155752	0.00679644	0.218574	0.0176768	0.166458
Proliferating NK	RSV G1 vs COVID G3_S	-	0.00155752	0.00679644	0.224729	0.285714	0.649746
Proliferating NK	RSV G3 vs Healthy	+	0.00155752	0.00679644	0.600066	0.20391	0.574538
Proliferating NK	RSV G3 vs COVID G1	+	0.00155752	0.00679644	0.808274	0.469755	0.78624
Proliferating NK	COVID G3_S vs Healthy	+	0.00155752	0.00679644	0.875149	0.753848	0.939618
Proliferating NK	COVID G1 vs Healthy	+	0.00155752	0.00679644	0.900127	0.914145	1
Proliferating NK	RSV G2 vs Healthy	+	0.00155752	0.00679644	0.900127	0.703094	0.923876
Proliferating NK	COVID G3_S vs COVID G1	+	0.00155752	0.00679644	0.900127	0.825175	0.979713
Proliferating NK	RSV G2 vs COVID G1	+	0.00155752	0.00679644	0.900127	0.757692	0.940294
Proliferating NK	COVID G3 vs COVID G2	+	0.00155752	0.00679644	0.900127	0.959276	1
Proliferating NK	RSV G1 vs COVID G3	-	0.00155752	0.00679644	0.900127	0.84127	0.981098
Proliferating NK	RSV G2 vs COVID G3_S	-	0.00155752	0.00679644	0.900127	1	1
Proliferating NK	RSV G3 vs COVID G3_S	-	0.00155752	0.00679644	0.900127	0.648485	0.889191
Proliferating NK	RSV G3 vs RSV G2	-	0.00155752	0.00679644	0.900127	0.455711	0.772352
Proliferating NK	RSV G1 vs COVID G2	-	0.00155752	0.00679644	0.947979	0.646089	0.889191
Mo-DC	RSV G3 vs COVID G1	-	0.00191484	0.00765937	0.00385102	0.000947106	0.047952
Mo-DC	COVID G2 vs COVID G1	-	0.00191484	0.00765937	0.00955056	0.00192545	0.0626573
Mo-DC	RSV G3 vs Healthy	-	0.00191484	0.00765937	0.0288791	0.00500515	0.0885122
Mo-DC	COVID G3_S vs COVID G1	-	0.00191484	0.00765937	0.0596781	0.187221	0.554895
Mo-DC	COVID G2 vs Healthy	-	0.00191484	0.00765937	0.091782	0.00940891	0.116137
Mo-DC	COVID G3 vs COVID G1	-	0.00191484	0.00765937	0.11532	0.0616616	0.318743
Mo-DC	RSV G1 vs COVID G1	-	0.00191484	0.00765937	0.11532	0.011988	0.134517
Mo-DC	RSV G3 vs RSV G2	-	0.00191484	0.00765937	0.180523	0.018661	0.166557
Mo-DC	COVID G3_S vs Healthy	+	0.00191484	0.00765937	0.22538	0.177717	0.545325
Mo-DC	RSV G2 vs COVID G1	-	0.00191484	0.00765937	0.22538	0.0548951	0.298667
Mo-DC	COVID G1 vs Healthy	+	0.00191484	0.00765937	0.382826	0.0523451	0.294359
Mo-DC	COVID G3 vs Healthy	-	0.00191484	0.00765937	0.428182	0.209495	0.584152
Mo-DC	RSV G1 vs Healthy	-	0.00191484	0.00765937	0.428182	0.0849092	0.372935
Mo-DC	RSV G2 vs COVID G2	+	0.00191484	0.00765937	0.428182	0.18629	0.554895
Mo-DC	RSV G3 vs COVID G3	-	0.00191484	0.00765937	0.428182	0.22495	0.61201
Mo-DC	RSV G3 vs RSV G1	-	0.00191484	0.00765937	0.428182	0.185994	0.554895
Mo-DC	RSV G2 vs COVID G3_S	-	0.00191484	0.00765937	0.435036	0.33347	0.691642
Mo-DC	RSV G3 vs COVID G2	-	0.00191484	0.00765937	0.580437	0.272355	0.649015
Mo-DC	RSV G2 vs Healthy	-	0.00191484	0.00765937	0.676714	0.465065	0.782287
Mo-DC	COVID G3 vs COVID G2	+	0.00191484	0.00765937	0.676714	0.62778	0.885223
Mo-DC	RSV G1 vs COVID G2	+	0.00191484	0.00765937	0.676714	0.426347	0.759902
Mo-DC	COVID G3_S vs COVID G3	+	0.00191484	0.00765937	0.676714	0.687322	0.919722
Mo-DC	RSV G2 vs COVID G3	+	0.00191484	0.00765937	0.676714	0.743596	0.939618
Mo-DC	RSV G1 vs COVID G3_S	-	0.00191484	0.00765937	0.676714	0.262239	0.638496
Mo-DC	RSV G3 vs COVID G3_S	-	0.00191484	0.00765937	0.676714	0.912853	1
Mo-DC	RSV G2 vs RSV G1	+	0.00191484	0.00765937	0.676714	0.530303	0.819571
Mo-DC	COVID G3_S vs COVID G2	+	0.00191484	0.00765937	0.91854	0.486267	0.800905
Mo-DC	RSV G1 vs COVID G3	-	0.00191484	0.00765937	0.973562	0.834035	0.981098
CD4+ TEMRA	RSV G1 vs Healthy	+	0.00208232	0.00768855	0.0159821	0.00204617	0.0626573
CD4+ TEMRA	RSV G2 vs Healthy	+	0.00208232	0.00768855	0.0212229	0.00622576	0.0950843
CD4+ TEMRA	RSV G3 vs Healthy	+	0.00208232	0.00768855	0.024971	0.0050855	0.0887652
CD4+ TEMRA	RSV G1 vs COVID G2	+	0.00208232	0.00768855	0.0418266	0.0153392	0.156181
CD4+ TEMRA	RSV G2 vs COVID G2	+	0.00208232	0.00768855	0.0952686	0.0270975	0.209305
CD4+ TEMRA	RSV G3 vs COVID G2	+	0.00208232	0.00768855	0.12109	0.0511645	0.288929
CD4+ TEMRA	RSV G1 vs COVID G1	+	0.00208232	0.00768855	0.150487	0.0112088	0.130996
CD4+ TEMRA	RSV G1 vs COVID G3	+	0.00208232	0.00768855	0.210334	0.0936926	0.397233
CD4+ TEMRA	RSV G2 vs COVID G1	+	0.00208232	0.00768855	0.292136	0.0257845	0.202657
CD4+ TEMRA	RSV G1 vs COVID G3_S	+	0.00208232	0.00768855	0.292136	0.0634921	0.323232
CD4+ TEMRA	COVID G1 vs Healthy	+	0.00208232	0.00768855	0.323528	0.0436282	0.270213
CD4+ TEMRA	RSV G3 vs COVID G1	+	0.00208232	0.00768855	0.323528	0.111282	0.432203
CD4+ TEMRA	RSV G2 vs COVID G3	+	0.00208232	0.00768855	0.323528	0.190745	0.554895
CD4+ TEMRA	RSV G3 vs COVID G3	+	0.00208232	0.00768855	0.360206	0.252279	0.637337
CD4+ TEMRA	COVID G3_S vs Healthy	+	0.00208232	0.00768855	0.407296	0.107109	0.425902
CD4+ TEMRA	RSV G2 vs COVID G3_S	+	0.00208232	0.00768855	0.407296	0.0882469	0.382593
CD4+ TEMRA	COVID G3 vs Healthy	+	0.00208232	0.00768855	0.426536	0.276446	0.649746
CD4+ TEMRA	RSV G3 vs COVID G3_S	+	0.00208232	0.00768855	0.426536	0.255756	0.638496
CD4+ TEMRA	COVID G2 vs Healthy	+	0.00208232	0.00768855	0.652565	0.489232	0.801616
CD4+ TEMRA	COVID G2 vs COVID G1	-	0.00208232	0.00768855	0.654552	0.40062	0.759902
CD4+ TEMRA	RSV G3 vs RSV G1	+	0.00208232	0.00768855	0.654552	0.755051	0.939618
CD4+ TEMRA	COVID G3_S vs COVID G2	+	0.00208232	0.00768855	0.658445	0.410593	0.759902
CD4+ TEMRA	RSV G2 vs RSV G1	-	0.00208232	0.00768855	0.699934	0.530303	0.819571
CD4+ TEMRA	COVID G3 vs COVID G2	+	0.00208232	0.00768855	0.707437	0.696887	0.923876
CD4+ TEMRA	COVID G3_S vs COVID G1	+	0.00208232	0.00768855	0.940813	0.938163	1
CD4+ TEMRA	COVID G3_S vs COVID G3	-	0.00208232	0.00768855	0.940813	1	1
CD4+ TEMRA	RSV G3 vs RSV G2	+	0.00208232	0.00768855	0.940813	1	1
CD4+ TEMRA	COVID G3 vs COVID G1	+	0.00208232	0.00768855	0.957833	1	1
ISGlo Naive CD4+ T	COVID G3 vs Healthy	-	0.00261989	0.00898248	0.0177921	0.000911369	0.047952
ISGlo Naive CD4+ T	COVID G3_S vs Healthy	-	0.00261989	0.00898248	0.0177921	0.000668338	0.047952
ISGlo Naive CD4+ T	RSV G2 vs Healthy	-	0.00261989	0.00898248	0.0177921	6.93433e-05	0.0310658
ISGlo Naive CD4+ T	COVID G2 vs Healthy	-	0.00261989	0.00898248	0.0558626	0.0882301	0.382593
ISGlo Naive CD4+ T	RSV G1 vs Healthy	-	0.00261989	0.00898248	0.0898021	0.047695	0.277952
ISGlo Naive CD4+ T	RSV G3 vs Healthy	-	0.00261989	0.00898248	0.124049	0.00851767	0.110075
ISGlo Naive CD4+ T	COVID G1 vs Healthy	-	0.00261989	0.00898248	0.246893	0.00704224	0.100689
ISGlo Naive CD4+ T	COVID G3_S vs COVID G1	-	0.00261989	0.00898248	0.391985	0.0335664	0.239815
ISGlo Naive CD4+ T	COVID G3 vs COVID G1	-	0.00261989	0.00898248	0.410259	0.111888	0.432203
ISGlo Naive CD4+ T	RSV G2 vs COVID G1	-	0.00261989	0.00898248	0.496793	0.0711538	0.347851
ISGlo Naive CD4+ T	COVID G3_S vs COVID G2	-	0.00261989	0.00898248	0.532596	0.520879	0.819571
ISGlo Naive CD4+ T	COVID G3 vs COVID G2	-	0.00261989	0.00898248	0.541736	0.442146	0.763908
ISGlo Naive CD4+ T	RSV G3 vs COVID G3_S	+	0.00261989	0.00898248	0.541736	0.230303	0.612925
ISGlo Naive CD4+ T	RSV G3 vs COVID G3	+	0.00261989	0.00898248	0.58762	0.343434	0.696193
ISGlo Naive CD4+ T	RSV G2 vs COVID G2	-	0.00261989	0.00898248	0.643009	0.77324	0.954478
ISGlo Naive CD4+ T	RSV G1 vs COVID G1	-	0.00261989	0.00898248	0.683036	0.23976	0.623975
ISGlo Naive CD4+ T	RSV G3 vs RSV G2	+	0.00261989	0.00898248	0.683036	0.317599	0.678622
ISGlo Naive CD4+ T	RSV G1 vs COVID G3_S	+	0.00261989	0.00898248	0.709288	0.730159	0.934603
ISGlo Naive CD4+ T	COVID G2 vs COVID G1	-	0.00261989	0.00898248	0.785241	0.455545	0.772352
ISGlo Naive CD4+ T	RSV G3 vs COVID G1	-	0.00261989	0.00898248	0.785241	0.837063	0.981098
ISGlo Naive CD4+ T	RSV G1 vs COVID G2	-	0.00261989	0.00898248	0.785241	0.959276	1
ISGlo Naive CD4+ T	RSV G1 vs COVID G3	+	0.00261989	0.00898248	0.785241	0.547619	0.828829
ISGlo Naive CD4+ T	RSV G2 vs COVID G3_S	+	0.00261989	0.00898248	0.785241	0.527273	0.819571
ISGlo Naive CD4+ T	RSV G2 vs RSV G1	-	0.00261989	0.00898248	0.785241	1	1
ISGlo Naive CD4+ T	RSV G3 vs RSV G1	+	0.00261989	0.00898248	0.785241	0.638889	0.885223
ISGlo Naive CD4+ T	RSV G2 vs COVID G3	+	0.00261989	0.00898248	0.843965	0.755051	0.939618
ISGlo Naive CD4+ T	COVID G3_S vs COVID G3	-	0.00261989	0.00898248	0.89636	1	1
ISGlo Naive CD4+ T	RSV G3 vs COVID G2	-	0.00261989	0.00898248	0.992717	1	1
Memory Treg	COVID G3_S vs Healthy	+	0.00352772	0.0112887	0.0897701	0.0314119	0.230697
Memory Treg	RSV G2 vs Healthy	+	0.00352772	0.0112887	0.0897701	0.00851767	0.110075
Memory Treg	RSV G3 vs Healthy	+	0.00352772	0.0112887	0.0897701	0.010598	0.124944
Memory Treg	COVID G3_S vs COVID G1	+	0.00352772	0.0112887	0.0897701	0.106294	0.425175
Memory Treg	COVID G3_S vs COVID G2	+	0.00352772	0.0112887	0.0897701	0.0296703	0.220314
Memory Treg	RSV G2 vs COVID G2	+	0.00352772	0.0112887	0.0897701	0.0221084	0.182293
Memory Treg	RSV G3 vs COVID G2	+	0.00352772	0.0112887	0.0897701	0.00976423	0.116137
Memory Treg	RSV G1 vs Healthy	+	0.00352772	0.0112887	0.0901614	0.0386572	0.261082
Memory Treg	RSV G1 vs COVID G2	+	0.00352772	0.0112887	0.0931199	0.0268261	0.208406
Memory Treg	COVID G3 vs Healthy	+	0.00352772	0.0112887	0.132374	0.0583276	0.309619
Memory Treg	RSV G2 vs COVID G1	+	0.00352772	0.0112887	0.132374	0.0711538	0.347851
Memory Treg	COVID G3 vs COVID G2	+	0.00352772	0.0112887	0.134941	0.0484809	0.278588
Memory Treg	RSV G3 vs COVID G1	+	0.00352772	0.0112887	0.147681	0.0229021	0.185424
Memory Treg	RSV G1 vs COVID G1	+	0.00352772	0.0112887	0.154029	0.0829171	0.369889
Memory Treg	COVID G3 vs COVID G1	+	0.00352772	0.0112887	0.246156	0.0829171	0.369889
Memory Treg	COVID G3_S vs COVID G3	+	0.00352772	0.0112887	0.749538	0.285714	0.649746
Memory Treg	RSV G3 vs COVID G3_S	-	0.00352772	0.0112887	0.772314	0.230303	0.612925
Memory Treg	RSV G1 vs COVID G3_S	-	0.00352772	0.0112887	0.833405	0.285714	0.649746
Memory Treg	RSV G2 vs COVID G3_S	-	0.00352772	0.0112887	0.833405	0.163636	0.524886
Memory Treg	COVID G1 vs Healthy	+	0.00352772	0.0112887	0.959177	0.746407	0.939618
Memory Treg	COVID G2 vs COVID G1	-	0.00352772	0.0112887	0.959177	0.545798	0.828829
Memory Treg	RSV G1 vs COVID G3	+	0.00352772	0.0112887	0.976681	0.84127	0.981098
Memory Treg	RSV G2 vs COVID G3	+	0.00352772	0.0112887	0.976681	0.755051	0.939618
Memory Treg	RSV G3 vs COVID G3	-	0.00352772	0.0112887	0.976681	0.876263	0.991691
Memory Treg	RSV G3 vs RSV G1	-	0.00352772	0.0112887	0.976681	0.755051	0.939618
Memory Treg	RSV G3 vs RSV G2	-	0.00352772	0.0112887	0.976681	0.382867	0.741077
Memory Treg	COVID G2 vs Healthy	-	0.00352772	0.0112887	0.981748	0.911853	1
Memory Treg	RSV G2 vs RSV G1	-	0.00352772	0.0112887	0.981748	1	1
ISGhi Naive B	COVID G2 vs Healthy	+	0.00422983	0.0126895	0.0431925	0.0247118	0.196524
ISGhi Naive B	RSV G2 vs Healthy	+	0.00422983	0.0126895	0.0431925	0.00500515	0.0885122
ISGhi Naive B	RSV G3 vs Healthy	+	0.00422983	0.0126895	0.0431925	0.000464022	0.047952
ISGhi Naive B	RSV G1 vs Healthy	+	0.00422983	0.0126895	0.0465528	0.0119309	0.134517
ISGhi Naive B	RSV G2 vs COVID G1	+	0.00422983	0.0126895	0.137839	0.0171533	0.166458
ISGhi Naive B	COVID G3 vs Healthy	+	0.00422983	0.0126895	0.173455	0.0410749	0.263973
ISGhi Naive B	RSV G1 vs COVID G1	+	0.00422983	0.0126895	0.173455	0.028971	0.216317
ISGhi Naive B	RSV G3 vs COVID G1	+	0.00422983	0.0126895	0.173455	0.00332168	0.0744056
ISGhi Naive B	COVID G2 vs COVID G1	+	0.00422983	0.0126895	0.236503	0.0944759	0.399295
ISGhi Naive B	RSV G2 vs COVID G3_S	+	0.00422983	0.0126895	0.307534	0.184875	0.554895
ISGhi Naive B	RSV G1 vs COVID G3_S	+	0.00422983	0.0126895	0.379073	0.412698	0.759902
ISGhi Naive B	RSV G3 vs COVID G3_S	+	0.00422983	0.0126895	0.379073	0.315152	0.678622
ISGhi Naive B	COVID G3 vs COVID G1	+	0.00422983	0.0126895	0.383637	0.297702	0.659058
ISGhi Naive B	COVID G3_S vs COVID G2	-	0.00422983	0.0126895	0.517571	0.361666	0.719775
ISGhi Naive B	COVID G3_S vs COVID G3	-	0.00422983	0.0126895	0.662345	0.412698	0.759902
ISGhi Naive B	COVID G1 vs Healthy	+	0.00422983	0.0126895	0.758502	0.234123	0.617514
ISGhi Naive B	COVID G3_S vs Healthy	+	0.00422983	0.0126895	0.758502	0.684983	0.91878
ISGhi Naive B	RSV G2 vs COVID G2	+	0.00422983	0.0126895	0.758502	0.641464	0.887876
ISGhi Naive B	RSV G2 vs COVID G3	+	0.00422983	0.0126895	0.758502	0.431818	0.759902
ISGhi Naive B	RSV G1 vs COVID G2	+	0.00422983	0.0126895	0.779208	0.712009	0.923876
ISGhi Naive B	RSV G1 vs COVID G3	+	0.00422983	0.0126895	0.781645	0.84127	0.981098
ISGhi Naive B	RSV G3 vs COVID G2	-	0.00422983	0.0126895	0.807631	0.703584	0.923876
ISGhi Naive B	RSV G3 vs COVID G3	-	0.00422983	0.0126895	0.807631	0.755051	0.939618
ISGhi Naive B	COVID G3_S vs COVID G1	+	0.00422983	0.0126895	0.9276	1	1
ISGhi Naive B	RSV G3 vs RSV G2	-	0.00422983	0.0126895	0.9276	0.534965	0.819571
ISGhi Naive B	RSV G3 vs RSV G1	-	0.00422983	0.0126895	0.946218	0.530303	0.819571
ISGhi Naive B	COVID G3 vs COVID G2	-	0.00422983	0.0126895	0.953117	1	1
ISGhi Naive B	RSV G2 vs RSV G1	+	0.00422983	0.0126895	0.953117	1	1
ISGlo CD14+ Monocyte	COVID G2 vs COVID G1	-	0.00481632	0.013599	0.0179996	0.00252488	0.0628415
ISGlo CD14+ Monocyte	COVID G3_S vs COVID G1	-	0.00481632	0.013599	0.0184335	0.0027972	0.0659551
ISGlo CD14+ Monocyte	RSV G2 vs COVID G2	+	0.00481632	0.013599	0.0590646	0.0129793	0.139488
ISGlo CD14+ Monocyte	RSV G2 vs COVID G3_S	+	0.00481632	0.013599	0.0590646	0.0242424	0.193939
ISGlo CD14+ Monocyte	COVID G2 vs Healthy	-	0.00481632	0.013599	0.102976	0.005648	0.0937149
ISGlo CD14+ Monocyte	COVID G3_S vs Healthy	-	0.00481632	0.013599	0.102976	0.0126984	0.138753
ISGlo CD14+ Monocyte	COVID G3 vs COVID G1	-	0.00481632	0.013599	0.111229	0.041958	0.263973
ISGlo CD14+ Monocyte	RSV G3 vs COVID G1	-	0.00481632	0.013599	0.196146	0.0711538	0.347851
ISGlo CD14+ Monocyte	RSV G1 vs COVID G3_S	+	0.00481632	0.013599	0.263546	0.285714	0.649746
ISGlo CD14+ Monocyte	RSV G2 vs COVID G3	+	0.00481632	0.013599	0.268581	0.14899	0.497362
ISGlo CD14+ Monocyte	COVID G1 vs Healthy	+	0.00481632	0.013599	0.286308	0.0461322	0.277952
ISGlo CD14+ Monocyte	RSV G3 vs COVID G3_S	+	0.00481632	0.013599	0.286308	0.230303	0.612925
ISGlo CD14+ Monocyte	RSV G1 vs COVID G1	-	0.00481632	0.013599	0.339255	0.297702	0.659058
ISGlo CD14+ Monocyte	RSV G1 vs COVID G2	+	0.00481632	0.013599	0.339255	0.328378	0.68531
ISGlo CD14+ Monocyte	RSV G3 vs RSV G2	-	0.00481632	0.013599	0.342806	0.259324	0.638496
ISGlo CD14+ Monocyte	COVID G3 vs Healthy	-	0.00481632	0.013599	0.419048	0.217741	0.597419
ISGlo CD14+ Monocyte	RSV G3 vs COVID G2	+	0.00481632	0.013599	0.419048	0.261411	0.638496
ISGlo CD14+ Monocyte	COVID G3_S vs COVID G3	-	0.00481632	0.013599	0.458064	0.190476	0.554895
ISGlo CD14+ Monocyte	RSV G2 vs Healthy	+	0.00481632	0.013599	0.539894	0.287781	0.65114
ISGlo CD14+ Monocyte	RSV G2 vs RSV G1	+	0.00481632	0.013599	0.539894	0.431818	0.759902
ISGlo CD14+ Monocyte	RSV G3 vs Healthy	-	0.00481632	0.013599	0.577784	0.455123	0.772352
ISGlo CD14+ Monocyte	COVID G3_S vs COVID G2	-	0.00481632	0.013599	0.577784	0.316484	0.678622
ISGlo CD14+ Monocyte	RSV G1 vs COVID G3	+	0.00481632	0.013599	0.577784	0.690476	0.919722
ISGlo CD14+ Monocyte	RSV G2 vs COVID G1	-	0.00481632	0.013599	0.690774	0.680594	0.917471
ISGlo CD14+ Monocyte	COVID G3 vs COVID G2	+	0.00481632	0.013599	0.690774	0.721396	0.930477
ISGlo CD14+ Monocyte	RSV G3 vs COVID G3	-	0.00481632	0.013599	0.701995	0.638889	0.885223
ISGlo CD14+ Monocyte	RSV G3 vs RSV G1	-	0.00481632	0.013599	0.774489	0.80721	0.969101
ISGlo CD14+ Monocyte	RSV G1 vs Healthy	+	0.00481632	0.013599	0.795169	1	1
ISGlo Naive B	COVID G2 vs COVID G1	-	0.0123948	0.0330527	0.0153803	0.000951083	0.047952
ISGlo Naive B	RSV G3 vs COVID G1	-	0.0123948	0.0330527	0.0566264	0.00034965	0.0427209
ISGlo Naive B	COVID G2 vs Healthy	-	0.0123948	0.0330527	0.0790896	0.0158088	0.158025
ISGlo Naive B	COVID G3 vs COVID G1	-	0.0123948	0.0330527	0.128001	0.028971	0.216317
ISGlo Naive B	RSV G3 vs Healthy	-	0.0123948	0.0330527	0.191524	0.0553186	0.298667
ISGlo Naive B	COVID G3_S vs COVID G1	-	0.0123948	0.0330527	0.191524	0.0195804	0.166557
ISGlo Naive B	RSV G2 vs COVID G1	-	0.0123948	0.0330527	0.329133	0.0417832	0.263973
ISGlo Naive B	COVID G1 vs Healthy	+	0.0123948	0.0330527	0.425564	0.281062	0.649746
ISGlo Naive B	COVID G3 vs Healthy	-	0.0123948	0.0330527	0.425564	0.163591	0.524886
ISGlo Naive B	COVID G3_S vs Healthy	-	0.0123948	0.0330527	0.425564	0.119967	0.442954
ISGlo Naive B	RSV G1 vs COVID G1	-	0.0123948	0.0330527	0.425564	0.518482	0.819571
ISGlo Naive B	RSV G1 vs COVID G2	+	0.0123948	0.0330527	0.425564	0.278604	0.649746
ISGlo Naive B	RSV G2 vs COVID G2	+	0.0123948	0.0330527	0.425564	0.167341	0.530441
ISGlo Naive B	RSV G3 vs RSV G1	-	0.0123948	0.0330527	0.470406	0.431818	0.759902
ISGlo Naive B	RSV G3 vs RSV G2	-	0.0123948	0.0330527	0.529583	0.259324	0.638496
ISGlo Naive B	RSV G1 vs COVID G3	+	0.0123948	0.0330527	0.653979	0.547619	0.828829
ISGlo Naive B	RSV G2 vs Healthy	-	0.0123948	0.0330527	0.665827	0.418071	0.759902
ISGlo Naive B	RSV G2 vs COVID G3	+	0.0123948	0.0330527	0.665827	0.431818	0.759902
ISGlo Naive B	RSV G1 vs COVID G3_S	+	0.0123948	0.0330527	0.665827	0.904762	1
ISGlo Naive B	RSV G2 vs COVID G3_S	+	0.0123948	0.0330527	0.738117	0.412121	0.759902
ISGlo Naive B	RSV G1 vs Healthy	-	0.0123948	0.0330527	0.843516	0.820081	0.978853
ISGlo Naive B	COVID G3_S vs COVID G2	+	0.0123948	0.0330527	0.843516	0.446154	0.76475
ISGlo Naive B	COVID G3 vs COVID G2	+	0.0123948	0.0330527	0.848107	0.798966	0.969101
ISGlo Naive B	RSV G3 vs COVID G3	-	0.0123948	0.0330527	0.899112	0.876263	0.991691
ISGlo Naive B	RSV G3 vs COVID G3_S	-	0.0123948	0.0330527	0.899112	0.787879	0.96177
ISGlo Naive B	RSV G2 vs RSV G1	-	0.0123948	0.0330527	0.899112	0.876263	0.991691
ISGlo Naive B	RSV G3 vs COVID G2	-	0.0123948	0.0330527	0.907024	0.710844	0.923876
ISGlo Naive B	COVID G3_S vs COVID G3	+	0.0123948	0.0330527	0.947372	0.904762	1
FKBP5hi B	COVID G3_S vs Healthy	+	0.0136223	0.0344142	0.00424276	0.00240519	0.0628415
FKBP5hi B	COVID G3_S vs COVID G1	+	0.0136223	0.0344142	0.00424276	0.00617797	0.0950843
FKBP5hi B	COVID G3_S vs COVID G2	+	0.0136223	0.0344142	0.0514446	0.0010989	0.049114
FKBP5hi B	COVID G3_S vs COVID G3	+	0.0136223	0.0344142	0.0980072	0.019451	0.166557
FKBP5hi B	RSV G1 vs COVID G3_S	-	0.0136223	0.0344142	0.0980072	0.015873	0.158025
FKBP5hi B	RSV G3 vs COVID G3_S	-	0.0136223	0.0344142	0.0980072	0.00606061	0.0950843
FKBP5hi B	RSV G2 vs COVID G1	+	0.0136223	0.0344142	0.16603	0.0531162	0.295141
FKBP5hi B	RSV G2 vs Healthy	+	0.0136223	0.0344142	0.198504	0.0718049	0.347851
FKBP5hi B	RSV G2 vs COVID G3_S	-	0.0136223	0.0344142	0.198504	0.00606061	0.0950843
FKBP5hi B	RSV G3 vs COVID G1	+	0.0136223	0.0344142	0.393913	0.107039	0.425902
FKBP5hi B	COVID G2 vs COVID G1	+	0.0136223	0.0344142	0.466881	0.142533	0.494997
FKBP5hi B	RSV G3 vs Healthy	-	0.0136223	0.0344142	0.493635	0.198455	0.567915
FKBP5hi B	COVID G2 vs Healthy	-	0.0136223	0.0344142	0.565012	0.173838	0.53958
FKBP5hi B	COVID G3 vs COVID G1	+	0.0136223	0.0344142	0.565012	0.405033	0.759902
FKBP5hi B	RSV G1 vs COVID G1	+	0.0136223	0.0344142	0.58459	0.275312	0.649746
FKBP5hi B	RSV G2 vs COVID G2	+	0.0136223	0.0344142	0.619785	0.271688	0.648578
FKBP5hi B	COVID G3 vs Healthy	-	0.0136223	0.0344142	0.658452	0.630064	0.885223
FKBP5hi B	RSV G2 vs RSV G1	+	0.0136223	0.0344142	0.664854	0.370914	0.72988
FKBP5hi B	RSV G1 vs Healthy	-	0.0136223	0.0344142	0.666189	0.381158	0.741077
FKBP5hi B	RSV G2 vs COVID G3	+	0.0136223	0.0344142	0.666189	0.62368	0.885223
FKBP5hi B	RSV G3 vs RSV G2	-	0.0136223	0.0344142	0.792183	0.481721	0.800905
FKBP5hi B	COVID G1 vs Healthy	-	0.0136223	0.0344142	0.839867	0.657132	0.895726
FKBP5hi B	RSV G3 vs COVID G2	+	0.0136223	0.0344142	0.885126	0.611934	0.878674
FKBP5hi B	RSV G3 vs RSV G1	+	0.0136223	0.0344142	0.885126	0.684221	0.918674
FKBP5hi B	RSV G3 vs COVID G3	-	0.0136223	0.0344142	0.919248	0.870088	0.991691
FKBP5hi B	COVID G3 vs COVID G2	+	0.0136223	0.0344142	0.965276	0.874061	0.991691
FKBP5hi B	RSV G1 vs COVID G2	+	0.0136223	0.0344142	0.965276	1	1
FKBP5hi B	RSV G1 vs COVID G3	-	0.0136223	0.0344142	0.965276	0.832519	0.981098
ISGlo Naive CD8+ T	COVID G2 vs Healthy	-	0.0168772	0.0405053	0.0345295	0.0024195	0.0628415
ISGlo Naive CD8+ T	RSV G1 vs Healthy	-	0.0168772	0.0405053	0.0345295	0.00030379	0.0427209
ISGlo Naive CD8+ T	COVID G3 vs Healthy	-	0.0168772	0.0405053	0.237978	0.047695	0.277952
ISGlo Naive CD8+ T	RSV G2 vs Healthy	-	0.0168772	0.0405053	0.237978	0.00679565	0.0993999
ISGlo Naive CD8+ T	RSV G1 vs COVID G1	-	0.0168772	0.0405053	0.237978	0.0829171	0.369889
ISGlo Naive CD8+ T	RSV G1 vs COVID G3_S	-	0.0168772	0.0405053	0.244068	0.285714	0.649746
ISGlo Naive CD8+ T	RSV G3 vs RSV G1	+	0.0168772	0.0405053	0.244068	0.267677	0.641279
ISGlo Naive CD8+ T	COVID G2 vs COVID G1	-	0.0168772	0.0405053	0.27119	0.0816592	0.369889
ISGlo Naive CD8+ T	COVID G3_S vs COVID G2	+	0.0168772	0.0405053	0.401674	0.261538	0.638496
ISGlo Naive CD8+ T	RSV G3 vs COVID G2	+	0.0168772	0.0405053	0.401674	0.261411	0.638496
ISGlo Naive CD8+ T	RSV G3 vs Healthy	-	0.0168772	0.0405053	0.525646	0.493875	0.803593
ISGlo Naive CD8+ T	COVID G3 vs COVID G1	-	0.0168772	0.0405053	0.525646	0.297702	0.659058
ISGlo Naive CD8+ T	RSV G2 vs COVID G1	-	0.0168772	0.0405053	0.525646	0.252273	0.637337
ISGlo Naive CD8+ T	COVID G3_S vs COVID G3	+	0.0168772	0.0405053	0.525646	0.555556	0.82963
ISGlo Naive CD8+ T	RSV G3 vs COVID G3	+	0.0168772	0.0405053	0.525646	0.530303	0.819571
ISGlo Naive CD8+ T	RSV G2 vs COVID G3_S	-	0.0168772	0.0405053	0.525646	0.230303	0.612925
ISGlo Naive CD8+ T	RSV G2 vs RSV G1	+	0.0168772	0.0405053	0.525646	0.106061	0.425175
ISGlo Naive CD8+ T	RSV G3 vs RSV G2	+	0.0168772	0.0405053	0.525646	0.208625	0.583118
ISGlo Naive CD8+ T	COVID G1 vs Healthy	-	0.0168772	0.0405053	0.557958	0.483516	0.800905
ISGlo Naive CD8+ T	RSV G1 vs COVID G3	-	0.0168772	0.0405053	0.587377	0.547619	0.828829
ISGlo Naive CD8+ T	RSV G1 vs COVID G2	-	0.0168772	0.0405053	0.601477	0.442146	0.763908
ISGlo Naive CD8+ T	COVID G3_S vs Healthy	-	0.0168772	0.0405053	0.778838	0.965414	1
ISGlo Naive CD8+ T	RSV G2 vs COVID G2	+	0.0168772	0.0405053	0.896673	0.535842	0.819571
ISGlo Naive CD8+ T	COVID G3_S vs COVID G1	-	0.0168772	0.0405053	0.925796	1	1
ISGlo Naive CD8+ T	RSV G3 vs COVID G1	-	0.0168772	0.0405053	0.925796	1	1
ISGlo Naive CD8+ T	COVID G3 vs COVID G2	+	0.0168772	0.0405053	0.925796	0.878798	0.991691
ISGlo Naive CD8+ T	RSV G3 vs COVID G3_S	-	0.0168772	0.0405053	0.925796	0.787879	0.96177
ISGlo Naive CD8+ T	RSV G2 vs COVID G3	+	0.0168772	0.0405053	0.931129	0.638889	0.885223
ISGlo Tfh	COVID G2 vs COVID G1	-	0.0183927	0.0420405	0.0137787	0.00252488	0.0628415
ISGlo Tfh	COVID G2 vs Healthy	-	0.0183927	0.0420405	0.0222801	0.00132572	0.0527217
ISGlo Tfh	COVID G3 vs COVID G1	-	0.0183927	0.0420405	0.318006	0.0599401	0.31104
ISGlo Tfh	RSV G1 vs COVID G1	-	0.0183927	0.0420405	0.318006	0.0829171	0.369889
ISGlo Tfh	RSV G3 vs COVID G1	-	0.0183927	0.0420405	0.318006	0.0907343	0.387133
ISGlo Tfh	RSV G2 vs COVID G2	+	0.0183927	0.0420405	0.318793	0.0358419	0.249593
ISGlo Tfh	COVID G3 vs Healthy	-	0.0183927	0.0420405	0.451475	0.140351	0.492511
ISGlo Tfh	RSV G1 vs Healthy	-	0.0183927	0.0420405	0.451475	0.119617	0.442954
ISGlo Tfh	RSV G3 vs Healthy	-	0.0183927	0.0420405	0.451475	0.186921	0.554895
ISGlo Tfh	COVID G3_S vs COVID G1	-	0.0183927	0.0420405	0.451475	0.33007	0.686709
ISGlo Tfh	RSV G2 vs COVID G1	-	0.0183927	0.0420405	0.451475	0.114161	0.432203
ISGlo Tfh	COVID G3_S vs COVID G2	+	0.0183927	0.0420405	0.451475	0.316484	0.678622
ISGlo Tfh	RSV G3 vs COVID G2	+	0.0183927	0.0420405	0.485155	0.34024	0.696193
ISGlo Tfh	COVID G1 vs Healthy	+	0.0183927	0.0420405	0.694557	0.281062	0.649746
ISGlo Tfh	COVID G3_S vs Healthy	+	0.0183927	0.0420405	0.694557	0.635255	0.885223
ISGlo Tfh	RSV G2 vs Healthy	-	0.0183927	0.0420405	0.694557	0.418071	0.759902
ISGlo Tfh	COVID G3 vs COVID G2	+	0.0183927	0.0420405	0.694557	0.442146	0.763908
ISGlo Tfh	RSV G1 vs COVID G2	+	0.0183927	0.0420405	0.694557	0.328378	0.68531
ISGlo Tfh	RSV G2 vs COVID G3	+	0.0183927	0.0420405	0.694557	0.431818	0.759902
ISGlo Tfh	RSV G2 vs RSV G1	+	0.0183927	0.0420405	0.703056	0.530303	0.819571
ISGlo Tfh	COVID G3_S vs COVID G3	+	0.0183927	0.0420405	0.7604	0.904762	1
ISGlo Tfh	RSV G3 vs RSV G2	-	0.0183927	0.0420405	0.7604	0.710373	0.923876
ISGlo Tfh	RSV G1 vs COVID G3_S	-	0.0183927	0.0420405	0.821698	0.904762	1
ISGlo Tfh	RSV G3 vs COVID G3	+	0.0183927	0.0420405	0.86876	0.755051	0.939618
ISGlo Tfh	RSV G3 vs COVID G3_S	-	0.0183927	0.0420405	0.86876	0.787879	0.96177
ISGlo Tfh	RSV G2 vs COVID G3_S	-	0.0183927	0.0420405	0.892653	0.787879	0.96177
ISGlo Tfh	RSV G3 vs RSV G1	+	0.0183927	0.0420405	0.892653	0.876263	0.991691
ISGlo Tfh	RSV G1 vs COVID G3	+	0.0183927	0.0420405	0.908197	0.84127	0.981098
ILC2	COVID G1 vs Healthy	+	0.0287622	0.062754	0.0386592	0.00405597	0.0838649
ILC2	COVID G2 vs COVID G1	-	0.0287622	0.062754	0.0386592	0.00424153	0.0863729
ILC2	RSV G2 vs COVID G1	-	0.0287622	0.062754	0.0386592	0.00722965	0.102275
ILC2	RSV G3 vs COVID G1	-	0.0287622	0.062754	0.325315	0.0893903	0.385066
ILC2	RSV G1 vs COVID G2	+	0.0287622	0.062754	0.325315	0.0904616	0.387133
ILC2	RSV G2 vs COVID G3_S	-	0.0287622	0.062754	0.325315	0.149135	0.497362
ILC2	RSV G2 vs RSV G1	-	0.0287622	0.062754	0.325315	0.0639776	0.323255
ILC2	COVID G3_S vs COVID G2	+	0.0287622	0.062754	0.330654	0.1542	0.508862
ILC2	RSV G1 vs Healthy	+	0.0287622	0.062754	0.346234	0.0396449	0.263973
ILC2	COVID G3 vs COVID G1	-	0.0287622	0.062754	0.346234	0.142028	0.494997
ILC2	COVID G3_S vs Healthy	+	0.0287622	0.062754	0.374112	0.185859	0.554895
ILC2	RSV G3 vs RSV G2	+	0.0287622	0.062754	0.619984	0.357693	0.716452
ILC2	COVID G3 vs Healthy	+	0.0287622	0.062754	0.627473	0.630064	0.885223
ILC2	RSV G2 vs Healthy	-	0.0287622	0.062754	0.627473	0.385282	0.742925
ILC2	RSV G3 vs Healthy	+	0.0287622	0.062754	0.627473	0.601752	0.870565
ILC2	COVID G3_S vs COVID G1	+	0.0287622	0.062754	0.627473	0.93986	1
ILC2	RSV G1 vs COVID G1	-	0.0287622	0.062754	0.627473	0.437562	0.763908
ILC2	COVID G3 vs COVID G2	+	0.0287622	0.062754	0.627473	0.39199	0.753698
ILC2	RSV G3 vs COVID G2	+	0.0287622	0.062754	0.627473	0.314771	0.678622
ILC2	COVID G3_S vs COVID G3	+	0.0287622	0.062754	0.627473	0.708624	0.923876
ILC2	RSV G1 vs COVID G3	-	0.0287622	0.062754	0.627473	0.834035	0.981098
ILC2	RSV G2 vs COVID G3	-	0.0287622	0.062754	0.627473	0.468835	0.785679
ILC2	RSV G3 vs COVID G3_S	-	0.0287622	0.062754	0.627473	0.56172	0.833855
ILC2	RSV G3 vs RSV G1	-	0.0287622	0.062754	0.627473	0.870088	0.991691
ILC2	COVID G2 vs Healthy	-	0.0287622	0.062754	0.752903	0.593538	0.862063
ILC2	RSV G2 vs COVID G2	-	0.0287622	0.062754	0.84166	0.769567	0.95327
ILC2	RSV G3 vs COVID G3	-	0.0287622	0.062754	0.986489	1	1
ILC2	RSV G1 vs COVID G3_S	-	0.0287622	0.062754	0.986489	0.730159	0.934603
ISGlo Naive Treg	COVID G3_S vs Healthy	-	0.0314727	0.0656821	0.160978	0.0985798	0.408924
ISGlo Naive Treg	RSV G1 vs Healthy	-	0.0314727	0.0656821	0.160978	0.00455685	0.0874915
ISGlo Naive Treg	RSV G2 vs Healthy	-	0.0314727	0.0656821	0.160978	0.00250214	0.0628415
ISGlo Naive Treg	COVID G3_S vs COVID G1	-	0.0314727	0.0656821	0.160978	0.106294	0.425175
ISGlo Naive Treg	RSV G1 vs COVID G1	-	0.0314727	0.0656821	0.160978	0.018981	0.166557
ISGlo Naive Treg	RSV G2 vs COVID G1	-	0.0314727	0.0656821	0.160978	0.0417832	0.263973
ISGlo Naive Treg	COVID G2 vs Healthy	-	0.0314727	0.0656821	0.26445	0.150115	0.498161
ISGlo Naive Treg	COVID G3 vs Healthy	-	0.0314727	0.0656821	0.26445	0.101162	0.417014
ISGlo Naive Treg	RSV G3 vs Healthy	-	0.0314727	0.0656821	0.26445	0.0645471	0.324911
ISGlo Naive Treg	COVID G2 vs COVID G1	-	0.0314727	0.0656821	0.26445	0.126528	0.462731
ISGlo Naive Treg	RSV G3 vs COVID G1	-	0.0314727	0.0656821	0.26445	0.114161	0.432203
ISGlo Naive Treg	COVID G3 vs COVID G1	-	0.0314727	0.0656821	0.267675	0.18981	0.554895
ISGlo Naive Treg	RSV G1 vs COVID G2	-	0.0314727	0.0656821	0.541736	0.328378	0.68531
ISGlo Naive Treg	COVID G3_S vs COVID G2	-	0.0314727	0.0656821	0.694562	0.446154	0.76475
ISGlo Naive Treg	RSV G3 vs RSV G1	+	0.0314727	0.0656821	0.741631	0.431818	0.759902
ISGlo Naive Treg	RSV G2 vs COVID G2	-	0.0314727	0.0656821	0.769677	0.710844	0.923876
ISGlo Naive Treg	RSV G1 vs COVID G3	-	0.0314727	0.0656821	0.769677	0.690476	0.919722
ISGlo Naive Treg	RSV G3 vs COVID G3_S	+	0.0314727	0.0656821	0.769677	0.527273	0.819571
ISGlo Naive Treg	COVID G3_S vs COVID G3	-	0.0314727	0.0656821	0.825681	0.555556	0.82963
ISGlo Naive Treg	RSV G2 vs RSV G1	+	0.0314727	0.0656821	0.898538	0.530303	0.819571
ISGlo Naive Treg	RSV G3 vs RSV G2	+	0.0314727	0.0656821	0.90158	0.804779	0.969101
ISGlo Naive Treg	COVID G3 vs COVID G2	-	0.0314727	0.0656821	0.904522	0.959276	1
ISGlo Naive Treg	RSV G2 vs COVID G3	-	0.0314727	0.0656821	0.904522	1	1
ISGlo Naive Treg	RSV G2 vs COVID G3_S	+	0.0314727	0.0656821	0.904522	0.412121	0.759902
ISGlo Naive Treg	RSV G3 vs COVID G2	-	0.0314727	0.0656821	0.9065	0.967135	1
ISGlo Naive Treg	COVID G1 vs Healthy	+	0.0314727	0.0656821	0.949331	0.746407	0.939618
ISGlo Naive Treg	RSV G3 vs COVID G3	+	0.0314727	0.0656821	0.949331	1	1
ISGlo Naive Treg	RSV G1 vs COVID G3_S	+	0.0314727	0.0656821	0.949331	0.555556	0.82963
Memory B	COVID G2 vs COVID G1	-	0.0333301	0.0666601	0.0449447	0.00499831	0.0885122
Memory B	RSV G3 vs COVID G1	-	0.0333301	0.0666601	0.0449447	0.000699301	0.047952
Memory B	COVID G2 vs Healthy	-	0.0333301	0.0666601	0.260013	0.039489	0.263973
Memory B	RSV G3 vs Healthy	-	0.0333301	0.0666601	0.260013	0.0553186	0.298667
Memory B	COVID G3 vs COVID G1	-	0.0333301	0.0666601	0.260013	0.0829171	0.369889
Memory B	COVID G3_S vs COVID G1	-	0.0333301	0.0666601	0.351736	0.0335664	0.239815
Memory B	RSV G1 vs COVID G2	+	0.0333301	0.0666601	0.351736	0.234324	0.617514
Memory B	RSV G2 vs COVID G2	+	0.0333301	0.0666601	0.351736	0.11983	0.442954
Memory B	RSV G3 vs RSV G1	-	0.0333301	0.0666601	0.351736	0.431818	0.759902
Memory B	RSV G3 vs RSV G2	-	0.0333301	0.0666601	0.351736	0.0530303	0.295141
Memory B	COVID G1 vs Healthy	+	0.0333301	0.0666601	0.386542	0.161119	0.524886
Memory B	RSV G2 vs COVID G1	-	0.0333301	0.0666601	0.533074	0.173776	0.53958
Memory B	COVID G3 vs Healthy	-	0.0333301	0.0666601	0.590226	0.282676	0.649746
Memory B	RSV G1 vs COVID G1	-	0.0333301	0.0666601	0.623463	0.606394	0.87165
Memory B	RSV G1 vs COVID G3	+	0.0333301	0.0666601	0.623463	0.420635	0.759902
Memory B	RSV G2 vs COVID G3	+	0.0333301	0.0666601	0.623463	0.530303	0.819571
Memory B	COVID G3_S vs Healthy	-	0.0333301	0.0666601	0.645581	0.361571	0.719775
Memory B	RSV G1 vs COVID G3_S	+	0.0333301	0.0666601	0.682989	0.555556	0.82963
Memory B	RSV G2 vs COVID G3_S	+	0.0333301	0.0666601	0.682989	0.412121	0.759902
Memory B	RSV G3 vs COVID G3_S	-	0.0333301	0.0666601	0.705908	0.412121	0.759902
Memory B	COVID G3_S vs COVID G2	+	0.0333301	0.0666601	0.748686	0.446154	0.76475
Memory B	RSV G3 vs COVID G3	-	0.0333301	0.0666601	0.748686	0.638889	0.885223
Memory B	COVID G3 vs COVID G2	+	0.0333301	0.0666601	0.80737	0.721396	0.930477
Memory B	RSV G3 vs COVID G2	-	0.0333301	0.0666601	0.960812	1	1
Memory B	RSV G1 vs Healthy	+	0.0333301	0.0666601	0.971229	0.879547	0.991704
Memory B	RSV G2 vs Healthy	-	0.0333301	0.0666601	0.971229	1	1
Memory B	COVID G3_S vs COVID G3	-	0.0333301	0.0666601	0.971229	0.730159	0.934603
Memory B	RSV G2 vs RSV G1	-	0.0333301	0.0666601	0.971229	0.876263	0.991691
CD8- γδ T	COVID G3_S vs COVID G1	-	0.0382071	0.0733577	0.0816896	0.0195804	0.166557
CD8- γδ T	COVID G3_S vs Healthy	-	0.0382071	0.0733577	0.0822575	0.0177109	0.166458
CD8- γδ T	COVID G2 vs COVID G1	-	0.0382071	0.0733577	0.0822575	0.0209062	0.173444
CD8- γδ T	COVID G2 vs Healthy	-	0.0382071	0.0733577	0.152061	0.0200859	0.167674
CD8- γδ T	RSV G2 vs COVID G3_S	+	0.0382071	0.0733577	0.152061	0.0727273	0.349091
CD8- γδ T	RSV G3 vs COVID G3_S	+	0.0382071	0.0733577	0.152061	0.0424242	0.263973
CD8- γδ T	RSV G2 vs COVID G2	+	0.0382071	0.0733577	0.36941	0.083115	0.369889
CD8- γδ T	RSV G3 vs COVID G2	+	0.0382071	0.0733577	0.36941	0.083115	0.369889
CD8- γδ T	COVID G3_S vs COVID G3	-	0.0382071	0.0733577	0.36941	0.190476	0.554895
CD8- γδ T	RSV G1 vs COVID G3_S	+	0.0382071	0.0733577	0.36941	0.0634921	0.323232
CD8- γδ T	COVID G3 vs COVID G1	-	0.0382071	0.0733577	0.415181	0.297702	0.659058
CD8- γδ T	RSV G1 vs COVID G1	-	0.0382071	0.0733577	0.435962	0.0829171	0.369889
CD8- γδ T	COVID G1 vs Healthy	+	0.0382071	0.0733577	0.621991	0.450516	0.770348
CD8- γδ T	COVID G3 vs Healthy	-	0.0382071	0.0733577	0.621991	0.3587	0.7174
CD8- γδ T	RSV G1 vs Healthy	-	0.0382071	0.0733577	0.621991	0.445584	0.76475
CD8- γδ T	RSV G2 vs COVID G1	-	0.0382071	0.0733577	0.621991	0.21049	0.5845
CD8- γδ T	RSV G3 vs COVID G1	-	0.0382071	0.0733577	0.621991	0.351049	0.706302
CD8- γδ T	COVID G3 vs COVID G2	+	0.0382071	0.0733577	0.621991	0.646089	0.889191
CD8- γδ T	COVID G3_S vs COVID G2	-	0.0382071	0.0733577	0.621991	0.103297	0.420699
CD8- γδ T	RSV G1 vs COVID G2	+	0.0382071	0.0733577	0.621991	0.234324	0.617514
CD8- γδ T	RSV G2 vs COVID G3	+	0.0382071	0.0733577	0.71609	0.876263	0.991691
CD8- γδ T	RSV G3 vs COVID G3	+	0.0382071	0.0733577	0.71609	0.638889	0.885223
CD8- γδ T	RSV G3 vs RSV G1	+	0.0382071	0.0733577	0.71609	0.638889	0.885223
CD8- γδ T	RSV G2 vs RSV G1	+	0.0382071	0.0733577	0.727674	0.530303	0.819571
CD8- γδ T	RSV G2 vs Healthy	-	0.0382071	0.0733577	0.891704	0.950593	1
CD8- γδ T	RSV G3 vs Healthy	-	0.0382071	0.0733577	0.912928	0.852495	0.99028
CD8- γδ T	RSV G1 vs COVID G3	-	0.0382071	0.0733577	0.955589	1	1
CD8- γδ T	RSV G3 vs RSV G2	+	0.0382071	0.0733577	0.955589	1	1
CD56dim NK	RSV G3 vs Healthy	-	0.0591379	0.108819	0.106708	0.00142154	0.0545871
CD56dim NK	RSV G3 vs RSV G1	-	0.0591379	0.108819	0.106708	0.106061	0.425175
CD56dim NK	RSV G3 vs RSV G2	-	0.0591379	0.108819	0.106708	0.0262238	0.204911
CD56dim NK	RSV G3 vs COVID G3	-	0.0591379	0.108819	0.118959	0.0479798	0.277952
CD56dim NK	COVID G1 vs Healthy	-	0.0591379	0.108819	0.371102	0.131271	0.468594
CD56dim NK	COVID G2 vs Healthy	-	0.0591379	0.108819	0.371102	0.115958	0.43533
CD56dim NK	COVID G3 vs COVID G1	+	0.0591379	0.108819	0.371102	0.146853	0.496819
CD56dim NK	RSV G1 vs COVID G1	+	0.0591379	0.108819	0.371102	0.111888	0.432203
CD56dim NK	RSV G2 vs COVID G1	+	0.0591379	0.108819	0.371102	0.114161	0.432203
CD56dim NK	COVID G3 vs COVID G2	+	0.0591379	0.108819	0.371102	0.278604	0.649746
CD56dim NK	RSV G1 vs COVID G2	+	0.0591379	0.108819	0.371102	0.19457	0.561164
CD56dim NK	RSV G2 vs COVID G2	+	0.0591379	0.108819	0.371102	0.167341	0.530441
CD56dim NK	RSV G3 vs COVID G2	-	0.0591379	0.108819	0.371102	0.142216	0.494997
CD56dim NK	RSV G3 vs COVID G3_S	-	0.0591379	0.108819	0.371102	0.163636	0.524886
CD56dim NK	RSV G3 vs COVID G1	-	0.0591379	0.108819	0.478238	0.252273	0.637337
CD56dim NK	RSV G1 vs COVID G3_S	+	0.0591379	0.108819	0.578636	0.555556	0.82963
CD56dim NK	RSV G2 vs COVID G3_S	+	0.0591379	0.108819	0.578636	0.412121	0.759902
CD56dim NK	COVID G3_S vs COVID G3	-	0.0591379	0.108819	0.618025	0.730159	0.934603
CD56dim NK	COVID G3_S vs Healthy	-	0.0591379	0.108819	0.720517	0.410359	0.759902
CD56dim NK	RSV G1 vs Healthy	+	0.0591379	0.108819	0.840368	0.282676	0.649746
CD56dim NK	RSV G2 vs Healthy	+	0.0591379	0.108819	0.850431	0.534232	0.819571
CD56dim NK	COVID G3_S vs COVID G1	+	0.0591379	0.108819	0.850431	0.825175	0.979713
CD56dim NK	COVID G3 vs Healthy	+	0.0591379	0.108819	0.874945	0.704337	0.923876
CD56dim NK	COVID G2 vs COVID G1	+	0.0591379	0.108819	0.90052	0.803566	0.969101
CD56dim NK	COVID G3_S vs COVID G2	+	0.0591379	0.108819	0.90052	0.861538	0.991691
CD56dim NK	RSV G1 vs COVID G3	-	0.0591379	0.108819	0.942597	0.84127	0.981098
CD56dim NK	RSV G2 vs RSV G1	+	0.0591379	0.108819	0.942597	1	1
CD56dim NK	RSV G2 vs COVID G3	-	0.0591379	0.108819	0.977693	1	1
Th22	COVID G2 vs COVID G1	-	0.0612105	0.108819	0.057342	0.00767883	0.104515
Th22	RSV G2 vs COVID G2	+	0.0612105	0.108819	0.123615	0.00113284	0.049114
Th22	COVID G1 vs Healthy	+	0.0612105	0.108819	0.309705	0.131205	0.468594
Th22	COVID G3_S vs COVID G2	+	0.0612105	0.108819	0.309705	0.161903	0.524886
Th22	RSV G3 vs COVID G2	+	0.0612105	0.108819	0.309705	0.0826321	0.369889
Th22	RSV G1 vs COVID G2	+	0.0612105	0.108819	0.399912	0.154476	0.508862
Th22	COVID G2 vs Healthy	-	0.0612105	0.108819	0.463179	0.115509	0.43533
Th22	RSV G2 vs Healthy	+	0.0612105	0.108819	0.463179	0.0420742	0.263973
Th22	COVID G3 vs COVID G1	-	0.0612105	0.108819	0.472541	0.111888	0.432203
Th22	RSV G2 vs COVID G3	+	0.0612105	0.108819	0.677656	0.343434	0.696193
Th22	COVID G3_S vs Healthy	+	0.0612105	0.108819	0.723365	0.394243	0.755866
Th22	COVID G3 vs COVID G2	+	0.0612105	0.108819	0.723365	0.267206	0.641279
Th22	RSV G3 vs Healthy	+	0.0612105	0.108819	0.749655	0.484411	0.800905
Th22	RSV G1 vs COVID G1	-	0.0612105	0.108819	0.749655	0.437562	0.763908
Th22	RSV G3 vs COVID G1	-	0.0612105	0.108819	0.749655	0.351049	0.706302
Th22	COVID G3_S vs COVID G3	+	0.0612105	0.108819	0.749655	0.622753	0.885223
Th22	RSV G1 vs Healthy	+	0.0612105	0.108819	0.766923	0.583295	0.854906
Th22	RSV G1 vs COVID G3	+	0.0612105	0.108819	0.766923	0.420635	0.759902
Th22	RSV G3 vs COVID G3	+	0.0612105	0.108819	0.766923	0.46412	0.782287
Th22	RSV G2 vs RSV G1	+	0.0612105	0.108819	0.766923	0.876263	0.991691
Th22	RSV G3 vs RSV G2	-	0.0612105	0.108819	0.766923	1	1
Th22	COVID G3_S vs COVID G1	-	0.0612105	0.108819	0.86819	0.825175	0.979713
Th22	RSV G1 vs COVID G3_S	-	0.0612105	0.108819	0.86819	0.730159	0.934603
Th22	RSV G3 vs COVID G3_S	-	0.0612105	0.108819	0.86819	0.569872	0.842954
Th22	RSV G2 vs COVID G1	-	0.0612105	0.108819	0.919257	0.351049	0.706302
Th22	RSV G2 vs COVID G3_S	-	0.0612105	0.108819	0.924608	0.787879	0.96177
Th22	COVID G3 vs Healthy	-	0.0612105	0.108819	0.985796	0.875348	0.991691
Th22	RSV G3 vs RSV G1	-	0.0612105	0.108819	0.985796	1	1
MGK	COVID G3 vs Healthy	+	0.0700712	0.11778	0.0624822	0.00322171	0.0744056
MGK	RSV G1 vs COVID G3	-	0.0700712	0.11778	0.114145	0.0200082	0.167674
MGK	RSV G2 vs COVID G3	-	0.0700712	0.11778	0.184586	0.0334937	0.239815
MGK	COVID G3 vs COVID G2	+	0.0700712	0.11778	0.23001	0.0497472	0.284512
MGK	RSV G3 vs Healthy	+	0.0700712	0.11778	0.251207	0.0585144	0.309619
MGK	COVID G3 vs COVID G1	+	0.0700712	0.11778	0.251207	0.018981	0.166557
MGK	RSV G3 vs RSV G1	+	0.0700712	0.11778	0.34493	0.129634	0.467319
MGK	COVID G1 vs Healthy	+	0.0700712	0.11778	0.529869	0.163155	0.524886
MGK	COVID G2 vs Healthy	+	0.0700712	0.11778	0.529869	0.284623	0.649746
MGK	COVID G3_S vs Healthy	+	0.0700712	0.11778	0.529869	0.310962	0.675175
MGK	RSV G1 vs COVID G1	-	0.0700712	0.11778	0.529869	0.251797	0.637337
MGK	COVID G3_S vs COVID G3	-	0.0700712	0.11778	0.529869	0.412698	0.759902
MGK	RSV G3 vs COVID G3	-	0.0700712	0.11778	0.529869	0.415977	0.759902
MGK	RSV G1 vs COVID G3_S	-	0.0700712	0.11778	0.529869	0.442771	0.763908
MGK	RSV G3 vs RSV G2	+	0.0700712	0.11778	0.529869	0.239548	0.623975
MGK	RSV G1 vs COVID G2	-	0.0700712	0.11778	0.536983	0.353199	0.708507
MGK	RSV G3 vs COVID G2	+	0.0700712	0.11778	0.536983	0.414779	0.759902
MGK	RSV G3 vs COVID G1	+	0.0700712	0.11778	0.635156	0.339337	0.696193
MGK	RSV G2 vs COVID G3_S	-	0.0700712	0.11778	0.635156	0.56172	0.833855
MGK	RSV G2 vs Healthy	+	0.0700712	0.11778	0.782588	0.716937	0.929183
MGK	RSV G2 vs COVID G1	-	0.0700712	0.11778	0.782588	0.631318	0.885223
MGK	COVID G3_S vs COVID G2	+	0.0700712	0.11778	0.782588	0.579639	0.850475
MGK	RSV G2 vs COVID G2	-	0.0700712	0.11778	0.782588	0.633583	0.885223
MGK	RSV G2 vs RSV G1	+	0.0700712	0.11778	0.782588	0.664737	0.904959
MGK	COVID G3_S vs COVID G1	+	0.0700712	0.11778	0.804265	0.757298	0.940294
MGK	RSV G3 vs COVID G3_S	-	0.0700712	0.11778	0.804265	0.924027	1
MGK	RSV G1 vs Healthy	-	0.0700712	0.11778	0.84724	0.773383	0.954478
MGK	COVID G2 vs COVID G1	+	0.0700712	0.11778	0.89122	0.914551	1
Th17	COVID G2 vs COVID G1	-	0.0711585	0.11778	0.0509674	0.00471995	0.0880709
Th17	COVID G2 vs Healthy	-	0.0711585	0.11778	0.157623	0.0144448	0.150495
Th17	RSV G2 vs COVID G2	+	0.0711585	0.11778	0.157623	0.00558557	0.0937149
Th17	RSV G3 vs COVID G2	+	0.0711585	0.11778	0.345351	0.0714333	0.347851
Th17	COVID G3_S vs COVID G1	+	0.0711585	0.11778	0.345794	0.24651	0.637133
Th17	COVID G1 vs Healthy	+	0.0711585	0.11778	0.615788	0.305817	0.667236
Th17	COVID G3_S vs Healthy	+	0.0711585	0.11778	0.615788	0.226025	0.612194
Th17	COVID G3 vs COVID G1	-	0.0711585	0.11778	0.615788	0.146853	0.496819
Th17	RSV G1 vs COVID G1	-	0.0711585	0.11778	0.615788	0.23976	0.623975
Th17	COVID G3 vs COVID G2	+	0.0711585	0.11778	0.615788	0.131443	0.468594
Th17	RSV G1 vs COVID G2	+	0.0711585	0.11778	0.615788	0.161307	0.524886
Th17	RSV G2 vs COVID G3_S	-	0.0711585	0.11778	0.615788	0.218253	0.597419
Th17	RSV G3 vs COVID G3_S	-	0.0711585	0.11778	0.615788	0.39075	0.752389
Th17	RSV G3 vs COVID G1	-	0.0711585	0.11778	0.76504	0.536014	0.819571
Th17	COVID G3_S vs COVID G3	+	0.0711585	0.11778	0.804553	0.533389	0.819571
Th17	RSV G2 vs COVID G3	+	0.0711585	0.11778	0.804553	0.755051	0.939618
Th17	RSV G1 vs COVID G3_S	-	0.0711585	0.11778	0.804553	0.533389	0.819571
Th17	COVID G3 vs Healthy	-	0.0711585	0.11778	0.828234	0.66645	0.904959
Th17	RSV G2 vs Healthy	-	0.0711585	0.11778	0.828234	0.619409	0.885223
Th17	RSV G2 vs COVID G1	-	0.0711585	0.11778	0.828234	0.407867	0.759902
Th17	COVID G3_S vs COVID G2	+	0.0711585	0.11778	0.828234	1	1
Th17	RSV G3 vs COVID G3	+	0.0711585	0.11778	0.828234	0.684221	0.918674
Th17	RSV G2 vs RSV G1	+	0.0711585	0.11778	0.828234	0.755051	0.939618
Th17	RSV G3 vs RSV G2	+	0.0711585	0.11778	0.828234	0.710373	0.923876
Th17	RSV G1 vs Healthy	-	0.0711585	0.11778	0.851885	0.968744	1
Th17	RSV G3 vs RSV G1	+	0.0711585	0.11778	0.851885	0.684221	0.918674
Th17	RSV G1 vs COVID G3	+	0.0711585	0.11778	0.955199	1	1
Th17	RSV G3 vs Healthy	-	0.0711585	0.11778	0.985189	0.974662	1
pDC	COVID G3_S vs Healthy	-	0.0757685	0.12123	0.113853	0.0175885	0.166458
pDC	RSV G3 vs Healthy	-	0.0757685	0.12123	0.202891	0.013077	0.139488
pDC	COVID G2 vs Healthy	-	0.0757685	0.12123	0.295976	0.0540779	0.298667
pDC	COVID G3_S vs COVID G1	-	0.0757685	0.12123	0.295976	0.0755796	0.359688
pDC	RSV G2 vs COVID G3_S	+	0.0757685	0.12123	0.295976	0.0719514	0.347851
pDC	RSV G1 vs COVID G3_S	+	0.0757685	0.12123	0.408534	0.109855	0.432203
pDC	COVID G3 vs Healthy	-	0.0757685	0.12123	0.418643	0.140351	0.492511
pDC	COVID G3_S vs COVID G2	-	0.0757685	0.12123	0.418643	0.0784625	0.368719
pDC	RSV G3 vs RSV G2	-	0.0757685	0.12123	0.418643	0.0973193	0.407468
pDC	RSV G3 vs COVID G1	-	0.0757685	0.12123	0.523845	0.21049	0.5845
pDC	COVID G3_S vs COVID G3	-	0.0757685	0.12123	0.544815	0.383221	0.741077
pDC	RSV G3 vs RSV G1	-	0.0757685	0.12123	0.627263	0.343434	0.696193
pDC	COVID G1 vs Healthy	-	0.0757685	0.12123	0.63199	0.41883	0.759902
pDC	RSV G1 vs Healthy	-	0.0757685	0.12123	0.688253	0.282676	0.649746
pDC	RSV G2 vs COVID G2	+	0.0757685	0.12123	0.688253	0.34024	0.696193
pDC	RSV G3 vs COVID G2	-	0.0757685	0.12123	0.688253	0.591808	0.862063
pDC	RSV G2 vs COVID G3	+	0.0757685	0.12123	0.688253	0.343434	0.696193
pDC	RSV G3 vs COVID G3_S	+	0.0757685	0.12123	0.688253	0.218253	0.597419
pDC	RSV G2 vs Healthy	-	0.0757685	0.12123	0.717389	0.418071	0.759902
pDC	COVID G2 vs COVID G1	-	0.0757685	0.12123	0.717389	0.594032	0.862063
pDC	COVID G3 vs COVID G1	-	0.0757685	0.12123	0.72209	0.797203	0.969101
pDC	RSV G3 vs COVID G3	-	0.0757685	0.12123	0.72209	0.431818	0.759902
pDC	RSV G1 vs COVID G2	+	0.0757685	0.12123	0.724676	0.646089	0.889191
pDC	RSV G1 vs COVID G3	+	0.0757685	0.12123	0.724676	0.547619	0.828829
pDC	RSV G2 vs COVID G1	-	0.0757685	0.12123	0.850273	0.837063	0.981098
pDC	RSV G2 vs RSV G1	+	0.0757685	0.12123	0.850273	1	1
pDC	RSV G1 vs COVID G1	-	0.0757685	0.12123	0.975164	1	1
pDC	COVID G3 vs COVID G2	-	0.0757685	0.12123	0.975164	1	1
Erythroblast	RSV G3 vs Healthy	+	0.0975638	0.149926	0.130075	0.00687812	0.0993999
Erythroblast	RSV G3 vs RSV G2	+	0.0975638	0.149926	0.164441	0.00976447	0.116137
Erythroblast	COVID G2 vs Healthy	+	0.0975638	0.149926	0.428833	0.1267	0.462731
Erythroblast	COVID G3 vs Healthy	+	0.0975638	0.149926	0.428833	0.0655039	0.328497
Erythroblast	RSV G3 vs COVID G1	+	0.0975638	0.149926	0.428833	0.111282	0.432203
Erythroblast	RSV G2 vs COVID G3	-	0.0975638	0.149926	0.428833	0.0921929	0.392112
Erythroblast	RSV G3 vs COVID G3_S	+	0.0975638	0.149926	0.428833	0.0121212	0.134517
Erythroblast	RSV G2 vs COVID G2	-	0.0975638	0.149926	0.506381	0.202918	0.572945
Erythroblast	RSV G3 vs COVID G2	+	0.0975638	0.149926	0.506381	0.288641	0.651343
Erythroblast	COVID G1 vs Healthy	+	0.0975638	0.149926	0.55397	0.249323	0.637337
Erythroblast	RSV G1 vs Healthy	+	0.0975638	0.149926	0.55397	0.266026	0.641279
Erythroblast	COVID G3_S vs COVID G3	-	0.0975638	0.149926	0.55397	0.139983	0.492511
Erythroblast	RSV G2 vs RSV G1	-	0.0975638	0.149926	0.55397	0.488051	0.800905
Erythroblast	RSV G3 vs RSV G1	+	0.0975638	0.149926	0.55397	0.415977	0.759902
Erythroblast	RSV G2 vs COVID G1	-	0.0975638	0.149926	0.557492	0.269164	0.643695
Erythroblast	COVID G3 vs COVID G1	+	0.0975638	0.149926	0.570919	0.251797	0.637337
Erythroblast	COVID G3 vs COVID G2	-	0.0975638	0.149926	0.766923	0.789613	0.963013
Erythroblast	COVID G3_S vs Healthy	-	0.0975638	0.149926	0.780288	0.468123	0.785464
Erythroblast	COVID G3_S vs COVID G2	-	0.0975638	0.149926	0.780288	0.666599	0.904959
Erythroblast	RSV G1 vs COVID G3	+	0.0975638	0.149926	0.780288	0.832519	0.981098
Erythroblast	RSV G3 vs COVID G3	+	0.0975638	0.149926	0.780288	1	1
Erythroblast	RSV G1 vs COVID G3_S	+	0.0975638	0.149926	0.780288	1	1
Erythroblast	RSV G2 vs COVID G3_S	-	0.0975638	0.149926	0.780288	0.487857	0.800905
Erythroblast	COVID G2 vs COVID G1	+	0.0975638	0.149926	0.837728	0.856377	0.991691
Erythroblast	COVID G3_S vs COVID G1	-	0.0975638	0.149926	0.843544	0.875664	0.991691
Erythroblast	RSV G1 vs COVID G1	+	0.0975638	0.149926	0.878827	0.785062	0.96177
Erythroblast	RSV G2 vs Healthy	-	0.0975638	0.149926	0.898357	0.943469	1
Erythroblast	RSV G1 vs COVID G2	-	0.0975638	0.149926	0.95586	1	1
AXL+ SIGLEC6+ DC	COVID G2 vs Healthy	-	0.0999504	0.149926	0.251716	0.0632158	0.323232
AXL+ SIGLEC6+ DC	COVID G3 vs Healthy	-	0.0999504	0.149926	0.251716	0.0531429	0.295141
AXL+ SIGLEC6+ DC	COVID G3_S vs Healthy	-	0.0999504	0.149926	0.251716	0.0824051	0.369889
AXL+ SIGLEC6+ DC	RSV G2 vs Healthy	-	0.0999504	0.149926	0.251716	0.0762665	0.359688
AXL+ SIGLEC6+ DC	RSV G3 vs Healthy	-	0.0999504	0.149926	0.251716	0.0762665	0.359688
AXL+ SIGLEC6+ DC	RSV G1 vs Healthy	-	0.0999504	0.149926	0.522578	0.171019	0.534534
AXL+ SIGLEC6+ DC	COVID G1 vs Healthy	-	0.0999504	0.149926	0.706201	0.291095	0.652052
AXL+ SIGLEC6+ DC	COVID G3 vs COVID G1	-	0.0999504	0.149926	0.706201	0.194047	0.561164
AXL+ SIGLEC6+ DC	COVID G3_S vs COVID G1	-	0.0999504	0.149926	0.734456	0.251056	0.637337
AXL+ SIGLEC6+ DC	COVID G2 vs COVID G1	-	0.0999504	0.149926	0.847908	0.624149	0.885223
AXL+ SIGLEC6+ DC	RSV G1 vs COVID G1	-	0.0999504	0.149926	0.847908	0.738363	0.939618
AXL+ SIGLEC6+ DC	RSV G2 vs COVID G1	-	0.0999504	0.149926	0.847908	0.404078	0.759902
AXL+ SIGLEC6+ DC	RSV G3 vs COVID G1	-	0.0999504	0.149926	0.847908	0.486867	0.800905
AXL+ SIGLEC6+ DC	COVID G3 vs COVID G2	-	0.0999504	0.149926	0.847908	0.26728	0.641279
AXL+ SIGLEC6+ DC	COVID G3_S vs COVID G2	-	0.0999504	0.149926	0.847908	0.327874	0.68531
AXL+ SIGLEC6+ DC	RSV G2 vs COVID G2	-	0.0999504	0.149926	0.847908	0.593898	0.862063
AXL+ SIGLEC6+ DC	RSV G1 vs COVID G3	+	0.0999504	0.149926	0.847908	0.423711	0.759902
AXL+ SIGLEC6+ DC	RSV G2 vs COVID G3	+	0.0999504	0.149926	0.847908	0.498962	0.808071
AXL+ SIGLEC6+ DC	RSV G3 vs COVID G3	+	0.0999504	0.149926	0.847908	0.498962	0.808071
AXL+ SIGLEC6+ DC	RSV G1 vs COVID G3_S	+	0.0999504	0.149926	0.847908	0.502335	0.811464
AXL+ SIGLEC6+ DC	RSV G2 vs COVID G3_S	+	0.0999504	0.149926	0.847908	0.57075	0.842954
AXL+ SIGLEC6+ DC	RSV G3 vs COVID G3_S	+	0.0999504	0.149926	0.847908	0.57075	0.842954
AXL+ SIGLEC6+ DC	RSV G3 vs COVID G2	-	0.0999504	0.149926	0.84815	0.678356	0.917471
AXL+ SIGLEC6+ DC	RSV G2 vs RSV G1	-	0.0999504	0.149926	0.913493	0.802839	0.969101
AXL+ SIGLEC6+ DC	RSV G3 vs RSV G1	-	0.0999504	0.149926	0.919035	0.802839	0.969101
AXL+ SIGLEC6+ DC	RSV G1 vs COVID G2	-	0.0999504	0.149926	0.992198	0.943545	1
AXL+ SIGLEC6+ DC	RSV G3 vs RSV G2	+	0.0999504	0.149926	0.993003	1	1
AXL+ SIGLEC6+ DC	COVID G3_S vs COVID G3	-	0.0999504	0.149926	1	1	1
cDC2	COVID G2 vs COVID G1	-	0.106181	0.154445	0.180017	0.0349228	0.24574
cDC2	COVID G3 vs COVID G1	-	0.106181	0.154445	0.180017	0.037373	0.257586
cDC2	COVID G2 vs Healthy	-	0.106181	0.154445	0.303788	0.0902717	0.387133
cDC2	COVID G3 vs Healthy	-	0.106181	0.154445	0.303788	0.0840387	0.372766
cDC2	RSV G2 vs COVID G1	-	0.106181	0.154445	0.303788	0.0504258	0.285959
cDC2	RSV G2 vs Healthy	-	0.106181	0.154445	0.507656	0.166265	0.530441
cDC2	COVID G3_S vs COVID G1	-	0.106181	0.154445	0.507656	0.183527	0.554895
cDC2	RSV G3 vs COVID G3	+	0.106181	0.154445	0.507656	0.118718	0.442282
cDC2	RSV G3 vs COVID G2	+	0.106181	0.154445	0.615332	0.0983408	0.408924
cDC2	RSV G1 vs COVID G3	+	0.106181	0.154445	0.615332	0.118797	0.442282
cDC2	RSV G1 vs COVID G1	-	0.106181	0.154445	0.624388	0.180495	0.552585
cDC2	RSV G3 vs COVID G1	-	0.106181	0.154445	0.624388	0.200665	0.571611
cDC2	RSV G1 vs COVID G2	+	0.106181	0.154445	0.624388	0.14795	0.497362
cDC2	RSV G3 vs RSV G2	+	0.106181	0.154445	0.624388	0.287355	0.65114
cDC2	COVID G1 vs Healthy	+	0.106181	0.154445	0.637361	0.35253	0.708222
cDC2	COVID G3_S vs Healthy	-	0.106181	0.154445	0.653283	0.489678	0.801616
cDC2	RSV G2 vs RSV G1	-	0.106181	0.154445	0.653283	0.31232	0.67703
cDC2	COVID G3_S vs COVID G3	+	0.106181	0.154445	0.699952	0.466854	0.784315
cDC2	RSV G1 vs Healthy	-	0.106181	0.154445	0.813178	0.577319	0.848925
cDC2	RSV G3 vs Healthy	-	0.106181	0.154445	0.813178	0.476628	0.795762
cDC2	COVID G3 vs COVID G2	-	0.106181	0.154445	0.813178	0.578877	0.850285
cDC2	COVID G3_S vs COVID G2	+	0.106181	0.154445	0.813178	0.738322	0.939618
cDC2	RSV G2 vs COVID G3	+	0.106181	0.154445	0.813178	0.562108	0.833855
cDC2	RSV G1 vs COVID G3_S	-	0.106181	0.154445	0.813178	0.708624	0.923876
cDC2	RSV G2 vs COVID G3_S	-	0.106181	0.154445	0.813178	0.917929	1
cDC2	RSV G3 vs COVID G3_S	+	0.106181	0.154445	0.813178	0.628688	0.885223
cDC2	RSV G2 vs COVID G2	-	0.106181	0.154445	0.937812	0.962482	1
cDC2	RSV G3 vs RSV G1	+	0.106181	0.154445	0.937812	0.743596	0.939618
CD8+ γδ T	COVID G2 vs COVID G1	-	0.121815	0.171974	0.0324558	0.00948825	0.116137
CD8+ γδ T	RSV G3 vs COVID G1	-	0.121815	0.171974	0.393922	0.0417832	0.263973
CD8+ γδ T	COVID G1 vs Healthy	+	0.121815	0.171974	0.430904	0.0461322	0.277952
CD8+ γδ T	COVID G2 vs Healthy	-	0.121815	0.171974	0.430904	0.0661139	0.3291
CD8+ γδ T	COVID G3_S vs COVID G1	-	0.121815	0.171974	0.430904	0.106294	0.425175
CD8+ γδ T	RSV G2 vs COVID G1	-	0.121815	0.171974	0.430904	0.0548951	0.298667
CD8+ γδ T	RSV G1 vs COVID G1	-	0.121815	0.171974	0.593711	0.0829171	0.369889
CD8+ γδ T	COVID G3 vs COVID G2	+	0.121815	0.171974	0.593711	0.159987	0.523169
CD8+ γδ T	COVID G3 vs COVID G1	-	0.121815	0.171974	0.63118	0.297702	0.659058
CD8+ γδ T	RSV G1 vs COVID G2	+	0.121815	0.171974	0.63118	0.19457	0.561164
CD8+ γδ T	RSV G2 vs COVID G2	+	0.121815	0.171974	0.63118	0.22684	0.612194
CD8+ γδ T	RSV G3 vs Healthy	-	0.121815	0.171974	0.919868	0.382764	0.741077
CD8+ γδ T	COVID G3_S vs COVID G2	+	0.121815	0.171974	0.919868	0.598901	0.867374
CD8+ γδ T	RSV G3 vs COVID G2	+	0.121815	0.171974	0.919868	0.431968	0.759902
CD8+ γδ T	RSV G3 vs COVID G3	-	0.121815	0.171974	0.919868	0.530303	0.819571
CD8+ γδ T	COVID G3 vs Healthy	+	0.121815	0.171974	0.925139	0.939622	1
CD8+ γδ T	COVID G3_S vs Healthy	-	0.121815	0.171974	0.925139	0.762907	0.945892
CD8+ γδ T	RSV G1 vs Healthy	-	0.121815	0.171974	0.925139	0.939622	1
CD8+ γδ T	RSV G2 vs Healthy	-	0.121815	0.171974	0.925139	0.804157	0.969101
CD8+ γδ T	COVID G3_S vs COVID G3	-	0.121815	0.171974	0.925139	0.730159	0.934603
CD8+ γδ T	RSV G1 vs COVID G3	-	0.121815	0.171974	0.925139	1	1
CD8+ γδ T	RSV G2 vs COVID G3	-	0.121815	0.171974	0.925139	1	1
CD8+ γδ T	RSV G1 vs COVID G3_S	-	0.121815	0.171974	0.925139	0.904762	1
CD8+ γδ T	RSV G2 vs COVID G3_S	+	0.121815	0.171974	0.925139	0.927273	1
CD8+ γδ T	RSV G3 vs COVID G3_S	-	0.121815	0.171974	0.925139	0.927273	1
CD8+ γδ T	RSV G2 vs RSV G1	+	0.121815	0.171974	0.925139	1	1
CD8+ γδ T	RSV G3 vs RSV G1	-	0.121815	0.171974	0.925139	0.431818	0.759902
CD8+ γδ T	RSV G3 vs RSV G2	-	0.121815	0.171974	0.925139	0.804779	0.969101
AIM2hi Memory B	COVID G3 vs COVID G1	-	0.137002	0.187889	0.253012	0.0452631	0.275265
AIM2hi Memory B	COVID G3 vs Healthy	-	0.137002	0.187889	0.306428	0.0410749	0.263973
AIM2hi Memory B	COVID G2 vs COVID G1	-	0.137002	0.187889	0.306428	0.0595806	0.310805
AIM2hi Memory B	RSV G3 vs COVID G1	-	0.137002	0.187889	0.306428	0.0565563	0.302835
AIM2hi Memory B	COVID G3_S vs COVID G3	+	0.137002	0.187889	0.411159	0.170609	0.534534
AIM2hi Memory B	COVID G2 vs Healthy	-	0.137002	0.187889	0.449262	0.0963972	0.404868
AIM2hi Memory B	RSV G1 vs COVID G3	+	0.137002	0.187889	0.449262	0.290347	0.651463
AIM2hi Memory B	RSV G2 vs COVID G3	+	0.137002	0.187889	0.449262	0.10195	0.417014
AIM2hi Memory B	RSV G3 vs Healthy	-	0.137002	0.187889	0.483587	0.126616	0.462731
AIM2hi Memory B	COVID G1 vs Healthy	+	0.137002	0.187889	0.576029	0.28098	0.649746
AIM2hi Memory B	RSV G2 vs COVID G1	-	0.137002	0.187889	0.576029	0.299126	0.659058
AIM2hi Memory B	COVID G3 vs COVID G2	-	0.137002	0.187889	0.576029	0.222577	0.608016
AIM2hi Memory B	COVID G3_S vs COVID G2	+	0.137002	0.187889	0.576029	0.30122	0.661722
AIM2hi Memory B	RSV G1 vs COVID G2	+	0.137002	0.187889	0.576029	0.49218	0.803593
AIM2hi Memory B	RSV G2 vs COVID G2	+	0.137002	0.187889	0.576029	0.289918	0.651463
AIM2hi Memory B	RSV G3 vs COVID G3_S	-	0.137002	0.187889	0.576029	0.294186	0.657881
AIM2hi Memory B	RSV G3 vs RSV G1	-	0.137002	0.187889	0.576029	0.326453	0.68531
AIM2hi Memory B	RSV G3 vs RSV G2	-	0.137002	0.187889	0.576029	0.36898	0.728421
AIM2hi Memory B	RSV G1 vs COVID G1	-	0.137002	0.187889	0.581919	0.363636	0.719775
AIM2hi Memory B	RSV G3 vs COVID G3	+	0.137002	0.187889	0.633221	0.32125	0.681009
AIM2hi Memory B	COVID G3_S vs COVID G1	-	0.137002	0.187889	0.861676	0.71049	0.923876
AIM2hi Memory B	RSV G2 vs COVID G3_S	-	0.137002	0.187889	0.861676	0.704817	0.923876
AIM2hi Memory B	RSV G2 vs Healthy	+	0.137002	0.187889	0.884642	0.656347	0.895564
AIM2hi Memory B	RSV G1 vs COVID G3_S	-	0.137002	0.187889	0.884642	0.805701	0.969101
AIM2hi Memory B	COVID G3_S vs Healthy	+	0.137002	0.187889	0.915007	0.753615	0.939618
AIM2hi Memory B	RSV G1 vs Healthy	+	0.137002	0.187889	0.915007	0.937482	1
AIM2hi Memory B	RSV G3 vs COVID G2	-	0.137002	0.187889	0.924914	1	1
AIM2hi Memory B	RSV G2 vs RSV G1	+	0.137002	0.187889	0.94313	1	1
cDC1	COVID G2 vs Healthy	-	0.153016	0.204021	0.344752	0.0344585	0.243749
cDC1	COVID G2 vs COVID G1	-	0.153016	0.204021	0.344752	0.0363004	0.251483
cDC1	RSV G2 vs Healthy	-	0.153016	0.204021	0.452324	0.156127	0.513044
cDC1	RSV G3 vs Healthy	-	0.153016	0.204021	0.452324	0.0887814	0.383673
cDC1	RSV G1 vs COVID G1	-	0.153016	0.204021	0.452324	0.183873	0.554895
cDC1	RSV G2 vs COVID G1	-	0.153016	0.204021	0.452324	0.144405	0.496819
cDC1	RSV G3 vs COVID G1	-	0.153016	0.204021	0.452324	0.11383	0.432203
cDC1	RSV G1 vs Healthy	-	0.153016	0.204021	0.475837	0.171019	0.534534
cDC1	COVID G3_S vs COVID G1	-	0.153016	0.204021	0.621818	0.275561	0.649746
cDC1	COVID G3_S vs Healthy	-	0.153016	0.204021	0.687965	0.265928	0.641279
cDC1	COVID G3 vs COVID G2	+	0.153016	0.204021	0.743166	0.20486	0.574804
cDC1	COVID G3 vs COVID G1	-	0.153016	0.204021	0.883032	0.476518	0.795762
cDC1	RSV G1 vs COVID G3	-	0.153016	0.204021	0.883032	0.440686	0.763908
cDC1	RSV G2 vs COVID G3	-	0.153016	0.204021	0.883032	0.522503	0.819571
cDC1	RSV G3 vs COVID G3	-	0.153016	0.204021	0.883032	0.39385	0.755866
cDC1	COVID G3 vs Healthy	-	0.153016	0.204021	0.961011	0.615449	0.881838
cDC1	COVID G1 vs Healthy	+	0.153016	0.204021	0.968408	0.733515	0.938006
cDC1	COVID G3_S vs COVID G2	-	0.153016	0.204021	0.968408	0.527089	0.819571
cDC1	RSV G1 vs COVID G2	-	0.153016	0.204021	0.968408	0.63801	0.885223
cDC1	RSV G2 vs COVID G2	-	0.153016	0.204021	0.968408	0.812038	0.972709
cDC1	RSV G3 vs COVID G2	-	0.153016	0.204021	0.968408	0.812038	0.972709
cDC1	COVID G3_S vs COVID G3	-	0.153016	0.204021	0.968408	0.771019	0.953311
cDC1	RSV G1 vs COVID G3_S	-	0.153016	0.204021	0.968408	0.866815	0.991691
cDC1	RSV G2 vs COVID G3_S	+	0.153016	0.204021	0.968408	0.888539	1
cDC1	RSV G3 vs COVID G3_S	-	0.153016	0.204021	0.968408	0.888539	1
cDC1	RSV G3 vs RSV G1	-	0.153016	0.204021	0.968408	1	1
cDC1	RSV G3 vs RSV G2	-	0.153016	0.204021	0.968408	1	1
cDC1	RSV G2 vs RSV G1	+	0.153016	0.204021	0.980371	1	1
CD4+ TCM	COVID G3 vs Healthy	-	0.171647	0.222677	0.29204	0.0386572	0.261082
CD4+ TCM	COVID G2 vs COVID G1	-	0.171647	0.222677	0.29204	0.0596634	0.310805
CD4+ TCM	COVID G3 vs COVID G1	-	0.171647	0.222677	0.29204	0.018981	0.166557
CD4+ TCM	RSV G2 vs COVID G3	+	0.171647	0.222677	0.29204	0.0479798	0.277952
CD4+ TCM	RSV G3 vs COVID G3	+	0.171647	0.222677	0.29204	0.106061	0.425175
CD4+ TCM	COVID G3_S vs COVID G1	-	0.171647	0.222677	0.492908	0.33007	0.686709
CD4+ TCM	COVID G2 vs Healthy	-	0.171647	0.222677	0.521574	0.163063	0.524886
CD4+ TCM	RSV G1 vs COVID G1	-	0.171647	0.222677	0.521574	0.23976	0.623975
CD4+ TCM	RSV G2 vs COVID G2	+	0.171647	0.222677	0.521574	0.195562	0.561615
CD4+ TCM	RSV G3 vs COVID G2	+	0.171647	0.222677	0.521574	0.261411	0.638496
CD4+ TCM	RSV G1 vs COVID G3	+	0.171647	0.222677	0.521574	0.309524	0.673139
CD4+ TCM	RSV G2 vs COVID G3_S	+	0.171647	0.222677	0.521574	0.412121	0.759902
CD4+ TCM	RSV G3 vs COVID G3_S	+	0.171647	0.222677	0.521574	0.527273	0.819571
CD4+ TCM	COVID G1 vs Healthy	+	0.171647	0.222677	0.592089	0.257705	0.638496
CD4+ TCM	COVID G3_S vs Healthy	+	0.171647	0.222677	0.592089	0.316792	0.678622
CD4+ TCM	COVID G3 vs COVID G2	-	0.171647	0.222677	0.592089	0.328378	0.68531
CD4+ TCM	RSV G2 vs RSV G1	+	0.171647	0.222677	0.721702	0.14899	0.497362
CD4+ TCM	RSV G3 vs RSV G1	+	0.171647	0.222677	0.729239	0.530303	0.819571
CD4+ TCM	RSV G1 vs Healthy	-	0.171647	0.222677	0.748638	0.704337	0.923876
CD4+ TCM	RSV G2 vs Healthy	+	0.171647	0.222677	0.748638	0.534232	0.819571
CD4+ TCM	RSV G3 vs Healthy	+	0.171647	0.222677	0.748638	0.756524	0.940294
CD4+ TCM	RSV G2 vs COVID G1	-	0.171647	0.222677	0.748638	0.407867	0.759902
CD4+ TCM	RSV G3 vs COVID G1	-	0.171647	0.222677	0.748638	1	1
CD4+ TCM	RSV G1 vs COVID G2	+	0.171647	0.222677	0.748638	0.505818	0.816109
CD4+ TCM	COVID G3_S vs COVID G3	+	0.171647	0.222677	0.748638	0.904762	1
CD4+ TCM	RSV G1 vs COVID G3_S	-	0.171647	0.222677	0.748638	0.412698	0.759902
CD4+ TCM	COVID G3_S vs COVID G2	+	0.171647	0.222677	0.919229	0.77033	0.953311
CD4+ TCM	RSV G3 vs RSV G2	+	0.171647	0.222677	0.955589	0.901515	1
CD56bright NK	RSV G1 vs Healthy	-	0.195192	0.246558	0.422225	0.047695	0.277952
CD56bright NK	RSV G2 vs Healthy	-	0.195192	0.246558	0.422225	0.0994903	0.411431
CD56bright NK	RSV G3 vs Healthy	-	0.195192	0.246558	0.422225	0.147123	0.496819
CD56bright NK	COVID G2 vs COVID G1	-	0.195192	0.246558	0.422225	0.240955	0.623975
CD56bright NK	RSV G1 vs COVID G1	-	0.195192	0.246558	0.422225	0.041958	0.263973
CD56bright NK	RSV G2 vs COVID G1	-	0.195192	0.246558	0.422225	0.114161	0.432203
CD56bright NK	RSV G3 vs COVID G1	-	0.195192	0.246558	0.422225	0.0548951	0.298667
CD56bright NK	RSV G1 vs COVID G3	-	0.195192	0.246558	0.422225	0.0555556	0.298667
CD56bright NK	RSV G2 vs COVID G3	-	0.195192	0.246558	0.422225	0.267677	0.641279
CD56bright NK	RSV G3 vs COVID G3	-	0.195192	0.246558	0.422225	0.14899	0.497362
CD56bright NK	RSV G1 vs COVID G3_S	-	0.195192	0.246558	0.422225	0.285714	0.649746
CD56bright NK	RSV G2 vs COVID G3_S	-	0.195192	0.246558	0.422225	0.412121	0.759902
CD56bright NK	RSV G3 vs COVID G3_S	-	0.195192	0.246558	0.422225	0.412121	0.759902
CD56bright NK	COVID G2 vs Healthy	+	0.195192	0.246558	0.498896	0.319096	0.679867
CD56bright NK	RSV G1 vs COVID G2	-	0.195192	0.246558	0.498896	0.328378	0.68531
CD56bright NK	COVID G3_S vs COVID G2	+	0.195192	0.246558	0.54263	0.520879	0.819571
CD56bright NK	COVID G3 vs COVID G2	+	0.195192	0.246558	0.547824	0.234324	0.617514
CD56bright NK	RSV G2 vs COVID G2	-	0.195192	0.246558	0.785743	0.650353	0.889191
CD56bright NK	RSV G3 vs COVID G2	-	0.195192	0.246558	0.785743	0.650353	0.889191
CD56bright NK	RSV G2 vs RSV G1	+	0.195192	0.246558	0.785743	0.530303	0.819571
CD56bright NK	RSV G3 vs RSV G1	+	0.195192	0.246558	0.785743	0.638889	0.885223
CD56bright NK	COVID G1 vs Healthy	+	0.195192	0.246558	0.906943	0.666342	0.904959
CD56bright NK	COVID G3_S vs Healthy	+	0.195192	0.246558	0.92854	0.697744	0.923876
CD56bright NK	COVID G3 vs Healthy	+	0.195192	0.246558	0.978868	1	1
CD56bright NK	COVID G3 vs COVID G1	-	0.195192	0.246558	0.978868	1	1
CD56bright NK	COVID G3_S vs COVID G1	+	0.195192	0.246558	0.978868	0.604196	0.87165
CD56bright NK	COVID G3_S vs COVID G3	+	0.195192	0.246558	0.978868	0.555556	0.82963
CD56bright NK	RSV G3 vs RSV G2	-	0.195192	0.246558	0.978868	1	1
Th1	COVID G1 vs Healthy	+	0.295685	0.363921	0.287454	0.0310936	0.229615
Th1	COVID G2 vs COVID G1	-	0.295685	0.363921	0.287454	0.0251815	0.199082
Th1	COVID G3 vs COVID G1	-	0.295685	0.363921	0.287454	0.0321313	0.23343
Th1	COVID G3_S vs COVID G1	-	0.295685	0.363921	0.66748	0.315209	0.678622
Th1	RSV G1 vs COVID G1	-	0.295685	0.363921	0.67464	0.363636	0.719775
Th1	RSV G2 vs COVID G1	-	0.295685	0.363921	0.67464	0.114161	0.432203
Th1	RSV G3 vs COVID G1	-	0.295685	0.363921	0.67464	0.173776	0.53958
Th1	RSV G2 vs COVID G3	+	0.295685	0.363921	0.67464	0.413508	0.759902
Th1	RSV G3 vs COVID G3	+	0.295685	0.363921	0.67464	0.282576	0.649746
Th1	COVID G3 vs Healthy	-	0.295685	0.363921	0.869769	0.28884	0.651343
Th1	RSV G2 vs Healthy	-	0.295685	0.363921	0.869769	0.493875	0.803593
Th1	RSV G3 vs Healthy	-	0.295685	0.363921	0.869769	0.546187	0.828829
Th1	COVID G3 vs COVID G2	-	0.295685	0.363921	0.869769	0.396166	0.758471
Th1	RSV G2 vs COVID G2	+	0.295685	0.363921	0.869769	0.299119	0.659058
Th1	RSV G3 vs COVID G2	+	0.295685	0.363921	0.869769	0.446673	0.76475
Th1	COVID G3_S vs COVID G3	+	0.295685	0.363921	0.869769	0.893273	1
Th1	RSV G1 vs COVID G3	+	0.295685	0.363921	0.869769	0.204501	0.574804
Th1	RSV G2 vs COVID G3_S	-	0.295685	0.363921	0.869769	0.776319	0.955469
Th1	RSV G3 vs COVID G3_S	-	0.295685	0.363921	0.869769	0.774812	0.954489
Th1	COVID G2 vs Healthy	-	0.295685	0.363921	0.932056	0.894305	1
Th1	COVID G3_S vs Healthy	+	0.295685	0.363921	0.932056	0.753615	0.939618
Th1	RSV G1 vs Healthy	+	0.295685	0.363921	0.932056	1	1
Th1	RSV G1 vs COVID G2	+	0.295685	0.363921	0.932056	1	1
Th1	RSV G1 vs COVID G3_S	-	0.295685	0.363921	0.932056	0.712155	0.923876
Th1	RSV G2 vs RSV G1	-	0.295685	0.363921	0.932056	0.638889	0.885223
Th1	RSV G3 vs RSV G1	-	0.295685	0.363921	0.932056	1	1
Th1	COVID G3_S vs COVID G2	+	0.295685	0.363921	0.961101	0.855238	0.991691
Th1	RSV G3 vs RSV G2	+	0.295685	0.363921	0.961101	1	1
MAIT	RSV G3 vs COVID G1	-	0.357309	0.428771	0.430455	0.0164336	0.161217
MAIT	COVID G1 vs Healthy	+	0.357309	0.428771	0.635009	0.215114	0.592933
MAIT	COVID G3 vs COVID G1	-	0.357309	0.428771	0.635009	0.146853	0.496819
MAIT	COVID G3_S vs COVID G1	-	0.357309	0.428771	0.635009	0.26014	0.638496
MAIT	RSV G1 vs COVID G1	-	0.357309	0.428771	0.635009	0.0829171	0.369889
MAIT	RSV G3 vs COVID G2	-	0.357309	0.428771	0.635009	0.0683496	0.338974
MAIT	RSV G3 vs Healthy	-	0.357309	0.428771	0.718093	0.233704	0.617514
MAIT	RSV G3 vs RSV G2	-	0.357309	0.428771	0.718093	0.259324	0.638496
MAIT	COVID G2 vs Healthy	-	0.357309	0.428771	0.79876	0.465004	0.782287
MAIT	COVID G3 vs Healthy	-	0.357309	0.428771	0.79876	0.820081	0.978853
MAIT	COVID G3_S vs Healthy	-	0.357309	0.428771	0.79876	0.697744	0.923876
MAIT	RSV G1 vs Healthy	-	0.357309	0.428771	0.79876	0.542644	0.827825
MAIT	COVID G2 vs COVID G1	-	0.357309	0.428771	0.79876	0.240955	0.623975
MAIT	RSV G2 vs COVID G1	-	0.357309	0.428771	0.79876	0.252273	0.637337
MAIT	COVID G3 vs COVID G2	-	0.357309	0.428771	0.79876	0.382676	0.741077
MAIT	COVID G3_S vs COVID G2	-	0.357309	0.428771	0.79876	0.379121	0.741077
MAIT	RSV G1 vs COVID G2	-	0.357309	0.428771	0.79876	0.442146	0.763908
MAIT	RSV G2 vs COVID G3	+	0.357309	0.428771	0.79876	0.638889	0.885223
MAIT	RSV G3 vs COVID G3	-	0.357309	0.428771	0.79876	0.876263	0.991691
MAIT	RSV G2 vs COVID G3_S	+	0.357309	0.428771	0.79876	0.648485	0.889191
MAIT	RSV G3 vs COVID G3_S	-	0.357309	0.428771	0.79876	0.927273	1
MAIT	RSV G2 vs RSV G1	+	0.357309	0.428771	0.79876	0.755051	0.939618
MAIT	RSV G3 vs RSV G1	-	0.357309	0.428771	0.79876	0.530303	0.819571
MAIT	RSV G2 vs Healthy	-	0.357309	0.428771	0.914525	0.804157	0.969101
MAIT	RSV G2 vs COVID G2	-	0.357309	0.428771	0.914525	0.967135	1
MAIT	RSV G1 vs COVID G3	+	0.357309	0.428771	0.988872	1	1
MAIT	RSV G1 vs COVID G3_S	-	0.357309	0.428771	0.988872	0.730159	0.934603
MAIT	COVID G3_S vs COVID G3	+	0.357309	0.428771	0.996902	1	1
Cycling T	COVID G2 vs Healthy	+	0.372618	0.436236	0.568857	0.0661139	0.3291
Cycling T	COVID G3 vs Healthy	+	0.372618	0.436236	0.568857	0.0386572	0.261082
Cycling T	COVID G3 vs COVID G1	+	0.372618	0.436236	0.568857	0.146853	0.496819
Cycling T	COVID G3_S vs COVID G3	-	0.372618	0.436236	0.568857	0.190476	0.554895
Cycling T	COVID G2 vs COVID G1	+	0.372618	0.436236	0.713103	0.213621	0.591972
Cycling T	COVID G3_S vs COVID G2	-	0.372618	0.436236	0.713103	0.261538	0.638496
Cycling T	RSV G2 vs COVID G3	-	0.372618	0.436236	0.713103	0.343434	0.696193
Cycling T	RSV G3 vs COVID G3	-	0.372618	0.436236	0.713103	0.0479798	0.277952
Cycling T	RSV G1 vs COVID G3	-	0.372618	0.436236	0.75337	0.309524	0.673139
Cycling T	RSV G1 vs Healthy	+	0.372618	0.436236	0.793679	0.542644	0.827825
Cycling T	RSV G2 vs Healthy	+	0.372618	0.436236	0.793679	0.589226	0.859847
Cycling T	RSV G3 vs Healthy	+	0.372618	0.436236	0.793679	0.455123	0.772352
Cycling T	COVID G3 vs COVID G2	+	0.372618	0.436236	0.793679	0.721396	0.930477
Cycling T	RSV G1 vs COVID G2	-	0.372618	0.436236	0.793679	0.442146	0.763908
Cycling T	RSV G2 vs COVID G2	-	0.372618	0.436236	0.793679	0.34024	0.696193
Cycling T	RSV G3 vs COVID G2	-	0.372618	0.436236	0.793679	0.535842	0.819571
Cycling T	RSV G1 vs COVID G3_S	+	0.372618	0.436236	0.793679	0.412698	0.759902
Cycling T	RSV G2 vs COVID G3_S	+	0.372618	0.436236	0.793679	0.927273	1
Cycling T	RSV G3 vs COVID G3_S	-	0.372618	0.436236	0.793679	0.230303	0.612925
Cycling T	COVID G3_S vs COVID G1	+	0.372618	0.436236	0.860908	1	1
Cycling T	RSV G1 vs COVID G1	+	0.372618	0.436236	0.860908	0.699301	0.923876
Cycling T	RSV G2 vs COVID G1	+	0.372618	0.436236	0.860908	0.680594	0.917471
Cycling T	RSV G3 vs COVID G1	-	0.372618	0.436236	0.860908	0.680594	0.917471
Cycling T	COVID G3_S vs Healthy	+	0.372618	0.436236	0.92561	0.635255	0.885223
Cycling T	COVID G1 vs Healthy	+	0.372618	0.436236	0.947269	0.82931	0.981098
Cycling T	RSV G2 vs RSV G1	+	0.372618	0.436236	0.993916	1	1
Cycling T	RSV G3 vs RSV G1	-	0.372618	0.436236	0.993916	0.876263	0.991691
Cycling T	RSV G3 vs RSV G2	-	0.372618	0.436236	0.993916	0.710373	0.923876
Plasmablast	COVID G1 vs Healthy	+	0.435679	0.497918	0.668634	0.131007	0.468594
Plasmablast	RSV G1 vs Healthy	+	0.435679	0.497918	0.668634	0.182404	0.554895
Plasmablast	COVID G2 vs COVID G1	+	0.435679	0.497918	0.668634	0.188455	0.554895
Plasmablast	COVID G3 vs COVID G1	-	0.435679	0.497918	0.668634	0.0452631	0.275265
Plasmablast	RSV G1 vs COVID G2	+	0.435679	0.497918	0.668634	0.102081	0.417014
Plasmablast	RSV G1 vs COVID G3	+	0.435679	0.497918	0.668634	0.0593271	0.310805
Plasmablast	RSV G2 vs RSV G1	-	0.435679	0.497918	0.668634	0.431818	0.759902
Plasmablast	RSV G3 vs RSV G1	-	0.435679	0.497918	0.668634	0.20202	0.571611
Plasmablast	COVID G3 vs Healthy	-	0.435679	0.497918	0.673168	0.3444	0.697099
Plasmablast	COVID G3_S vs COVID G1	-	0.435679	0.497918	0.673168	0.71049	0.923876
Plasmablast	RSV G2 vs COVID G1	-	0.435679	0.497918	0.673168	0.252273	0.637337
Plasmablast	RSV G3 vs COVID G1	-	0.435679	0.497918	0.673168	0.299126	0.659058
Plasmablast	COVID G3 vs COVID G2	-	0.435679	0.497918	0.673168	0.426347	0.759902
Plasmablast	COVID G3_S vs COVID G3	+	0.435679	0.497918	0.673168	0.383221	0.741077
Plasmablast	RSV G2 vs COVID G3	+	0.435679	0.497918	0.673168	0.51299	0.819571
Plasmablast	RSV G3 vs COVID G3	+	0.435679	0.497918	0.673168	0.51299	0.819571
Plasmablast	RSV G1 vs COVID G3_S	+	0.435679	0.497918	0.673168	0.285714	0.649746
Plasmablast	COVID G2 vs Healthy	+	0.435679	0.497918	0.979384	0.841671	0.981098
Plasmablast	COVID G3_S vs Healthy	-	0.435679	0.497918	0.979384	1	1
Plasmablast	RSV G3 vs Healthy	-	0.435679	0.497918	0.979384	0.923938	1
Plasmablast	RSV G1 vs COVID G1	+	0.435679	0.497918	0.979384	0.699301	0.923876
Plasmablast	COVID G3_S vs COVID G2	-	0.435679	0.497918	0.979384	0.855238	0.991691
Plasmablast	RSV G2 vs COVID G2	-	0.435679	0.497918	0.979384	0.966234	1
Plasmablast	RSV G3 vs COVID G2	-	0.435679	0.497918	0.979384	0.898943	1
Plasmablast	RSV G2 vs COVID G3_S	+	0.435679	0.497918	0.979384	1	1
Plasmablast	RSV G3 vs COVID G3_S	+	0.435679	0.497918	0.979384	1	1
Plasmablast	RSV G3 vs RSV G2	-	0.435679	0.497918	0.979384	0.949004	1
Plasmablast	RSV G2 vs Healthy	-	0.435679	0.497918	0.998442	1	1
ISGlo TrB	RSV G1 vs Healthy	+	0.480332	0.535323	0.628965	0.0849092	0.372935
ISGlo TrB	COVID G3_S vs COVID G1	-	0.480332	0.535323	0.628965	0.198601	0.567915
ISGlo TrB	COVID G3_S vs COVID G2	-	0.480332	0.535323	0.628965	0.17033	0.534534
ISGlo TrB	RSV G1 vs COVID G2	+	0.480332	0.535323	0.628965	0.19457	0.561164
ISGlo TrB	RSV G1 vs COVID G3	+	0.480332	0.535323	0.628965	0.690476	0.919722
ISGlo TrB	RSV G1 vs COVID G3_S	+	0.480332	0.535323	0.628965	0.190476	0.554895
ISGlo TrB	RSV G2 vs COVID G3_S	+	0.480332	0.535323	0.628965	0.230303	0.612925
ISGlo TrB	RSV G3 vs COVID G3_S	+	0.480332	0.535323	0.628965	0.315152	0.678622
ISGlo TrB	COVID G1 vs Healthy	+	0.480332	0.535323	0.674705	0.235729	0.62
ISGlo TrB	COVID G3_S vs Healthy	-	0.480332	0.535323	0.674705	0.144027	0.496819
ISGlo TrB	RSV G2 vs RSV G1	-	0.480332	0.535323	0.674705	0.20202	0.571611
ISGlo TrB	RSV G3 vs RSV G1	-	0.480332	0.535323	0.674705	0.20202	0.571611
ISGlo TrB	COVID G3_S vs COVID G3	-	0.480332	0.535323	0.722789	0.285714	0.649746
ISGlo TrB	COVID G3 vs COVID G1	-	0.480332	0.535323	0.816893	0.606394	0.87165
ISGlo TrB	RSV G1 vs COVID G1	+	0.480332	0.535323	0.816893	0.363636	0.719775
ISGlo TrB	COVID G2 vs COVID G1	-	0.480332	0.535323	0.884293	0.455545	0.772352
ISGlo TrB	COVID G2 vs Healthy	+	0.480332	0.535323	0.899827	0.807584	0.969101
ISGlo TrB	RSV G2 vs Healthy	+	0.480332	0.535323	0.899827	0.455123	0.772352
ISGlo TrB	RSV G3 vs Healthy	+	0.480332	0.535323	0.899827	0.534232	0.819571
ISGlo TrB	RSV G2 vs COVID G1	-	0.480332	0.535323	0.899827	0.837063	0.981098
ISGlo TrB	RSV G3 vs COVID G1	-	0.480332	0.535323	0.899827	0.536014	0.819571
ISGlo TrB	RSV G2 vs COVID G3	-	0.480332	0.535323	0.899827	0.638889	0.885223
ISGlo TrB	RSV G3 vs COVID G3	-	0.480332	0.535323	0.899827	0.755051	0.939618
ISGlo TrB	COVID G3 vs COVID G2	+	0.480332	0.535323	0.910359	0.721396	0.930477
ISGlo TrB	RSV G2 vs COVID G2	+	0.480332	0.535323	0.922379	1	1
ISGlo TrB	RSV G3 vs COVID G2	-	0.480332	0.535323	0.956245	0.967135	1
ISGlo TrB	RSV G3 vs RSV G2	-	0.480332	0.535323	0.956245	1	1
ISGlo TrB	COVID G3 vs Healthy	+	0.480332	0.535323	0.996155	0.820081	0.978853
Th2	COVID G1 vs Healthy	+	0.490713	0.535323	0.709988	0.177103	0.544682
Th2	COVID G2 vs Healthy	+	0.490713	0.535323	0.709988	0.25677	0.638496
Th2	COVID G3 vs Healthy	-	0.490713	0.535323	0.709988	0.345774	0.698827
Th2	COVID G3_S vs Healthy	+	0.490713	0.535323	0.709988	0.223597	0.609563
Th2	COVID G2 vs COVID G1	-	0.490713	0.535323	0.709988	0.183539	0.554895
Th2	COVID G3 vs COVID G1	-	0.490713	0.535323	0.709988	0.13806	0.489585
Th2	COVID G3_S vs COVID G1	-	0.490713	0.535323	0.709988	0.382668	0.741077
Th2	RSV G3 vs COVID G1	-	0.490713	0.535323	0.709988	0.165656	0.5301
Th2	RSV G1 vs COVID G2	+	0.490713	0.535323	0.709988	0.184918	0.554895
Th2	RSV G2 vs COVID G2	+	0.490713	0.535323	0.709988	0.519688	0.819571
Th2	RSV G1 vs COVID G3	+	0.490713	0.535323	0.709988	0.20869	0.583118
Th2	RSV G2 vs COVID G3	+	0.490713	0.535323	0.709988	0.32125	0.681009
Th2	RSV G1 vs COVID G3_S	-	0.490713	0.535323	0.709988	0.262239	0.638496
Th2	RSV G2 vs COVID G3_S	-	0.490713	0.535323	0.709988	0.487857	0.800905
Th2	RSV G1 vs Healthy	+	0.490713	0.535323	0.773521	0.433227	0.760126
Th2	RSV G2 vs COVID G1	-	0.490713	0.535323	0.773521	0.522284	0.819571
Th2	RSV G3 vs COVID G3	+	0.490713	0.535323	0.773521	0.32125	0.681009
Th2	RSV G3 vs COVID G3_S	-	0.490713	0.535323	0.773521	0.487857	0.800905
Th2	RSV G3 vs RSV G1	-	0.490713	0.535323	0.773521	0.515216	0.819571
Th2	COVID G3_S vs COVID G2	+	0.490713	0.535323	0.845085	0.486267	0.800905
Th2	RSV G3 vs COVID G2	-	0.490713	0.535323	0.845085	0.519688	0.819571
Th2	RSV G2 vs RSV G1	+	0.490713	0.535323	0.845085	0.870767	0.991691
Th2	RSV G3 vs RSV G2	-	0.490713	0.535323	0.845085	0.51827	0.819571
Th2	RSV G2 vs Healthy	+	0.490713	0.535323	0.862629	0.848567	0.987423
Th2	RSV G3 vs Healthy	-	0.490713	0.535323	0.862629	0.848567	0.987423
Th2	RSV G1 vs COVID G1	-	0.490713	0.535323	0.862629	0.593397	0.862063
Th2	COVID G3 vs COVID G2	-	0.490713	0.535323	0.862629	1	1
Th2	COVID G3_S vs COVID G3	+	0.490713	0.535323	0.878607	0.687322	0.919722
GZMKhi CD8+ T	COVID G2 vs Healthy	-	0.569723	0.607704	0.940124	0.115958	0.43533
GZMKhi CD8+ T	COVID G3 vs Healthy	-	0.569723	0.607704	0.940124	0.492899	0.803593
GZMKhi CD8+ T	RSV G1 vs Healthy	+	0.569723	0.607704	0.940124	0.594593	0.862063
GZMKhi CD8+ T	COVID G2 vs COVID G1	-	0.569723	0.607704	0.940124	0.145152	0.496819
GZMKhi CD8+ T	COVID G3 vs COVID G1	-	0.569723	0.607704	0.940124	0.606394	0.87165
GZMKhi CD8+ T	RSV G1 vs COVID G1	-	0.569723	0.607704	0.940124	0.606394	0.87165
GZMKhi CD8+ T	COVID G3_S vs COVID G2	+	0.569723	0.607704	0.940124	0.379121	0.741077
GZMKhi CD8+ T	RSV G1 vs COVID G2	+	0.569723	0.607704	0.940124	0.0193924	0.166557
GZMKhi CD8+ T	RSV G2 vs COVID G2	+	0.569723	0.607704	0.940124	0.22684	0.612194
GZMKhi CD8+ T	RSV G3 vs COVID G2	+	0.569723	0.607704	0.940124	0.167341	0.530441
GZMKhi CD8+ T	COVID G3_S vs COVID G3	+	0.569723	0.607704	0.940124	0.555556	0.82963
GZMKhi CD8+ T	RSV G1 vs COVID G3	+	0.569723	0.607704	0.940124	0.420635	0.759902
GZMKhi CD8+ T	RSV G2 vs COVID G3	+	0.569723	0.607704	0.940124	0.431818	0.759902
GZMKhi CD8+ T	RSV G3 vs COVID G3	+	0.569723	0.607704	0.940124	0.876263	0.991691
GZMKhi CD8+ T	RSV G1 vs COVID G3_S	-	0.569723	0.607704	0.940124	0.555556	0.82963
GZMKhi CD8+ T	RSV G2 vs RSV G1	-	0.569723	0.607704	0.940124	0.343434	0.696193
GZMKhi CD8+ T	RSV G3 vs RSV G1	-	0.569723	0.607704	0.940124	0.638889	0.885223
GZMKhi CD8+ T	COVID G1 vs Healthy	+	0.569723	0.607704	0.977786	1	1
GZMKhi CD8+ T	COVID G3_S vs Healthy	+	0.569723	0.607704	0.977786	0.965414	1
GZMKhi CD8+ T	RSV G2 vs Healthy	-	0.569723	0.607704	0.977786	0.950593	1
GZMKhi CD8+ T	RSV G3 vs Healthy	-	0.569723	0.607704	0.977786	0.852495	0.99028
GZMKhi CD8+ T	COVID G3_S vs COVID G1	+	0.569723	0.607704	0.977786	0.825175	0.979713
GZMKhi CD8+ T	RSV G2 vs COVID G1	-	0.569723	0.607704	0.977786	0.918182	1
GZMKhi CD8+ T	RSV G3 vs COVID G1	-	0.569723	0.607704	0.977786	0.837063	0.981098
GZMKhi CD8+ T	COVID G3 vs COVID G2	+	0.569723	0.607704	0.977786	0.878798	0.991691
GZMKhi CD8+ T	RSV G2 vs COVID G3_S	-	0.569723	0.607704	0.977786	0.927273	1
GZMKhi CD8+ T	RSV G3 vs COVID G3_S	-	0.569723	0.607704	0.977786	1	1
GZMKhi CD8+ T	RSV G3 vs RSV G2	-	0.569723	0.607704	0.977786	1	1
DN2 B	COVID G1 vs Healthy	+	0.618657	0.645555	0.906307	0.304158	0.665778
DN2 B	COVID G2 vs Healthy	+	0.618657	0.645555	0.906307	0.175768	0.542833
DN2 B	COVID G3_S vs Healthy	-	0.618657	0.645555	0.906307	0.753615	0.939618
DN2 B	RSV G1 vs Healthy	+	0.618657	0.645555	0.906307	0.455427	0.772352
DN2 B	RSV G2 vs Healthy	+	0.618657	0.645555	0.906307	0.702909	0.923876
DN2 B	RSV G3 vs Healthy	-	0.618657	0.645555	0.906307	0.408601	0.759902
DN2 B	COVID G2 vs COVID G1	-	0.618657	0.645555	0.906307	0.143844	0.496819
DN2 B	COVID G3 vs COVID G1	-	0.618657	0.645555	0.906307	0.285592	0.649746
DN2 B	COVID G3_S vs COVID G1	-	0.618657	0.645555	0.906307	0.588642	0.859847
DN2 B	RSV G2 vs COVID G1	-	0.618657	0.645555	0.906307	0.671773	0.911062
DN2 B	RSV G3 vs COVID G1	-	0.618657	0.645555	0.906307	0.112075	0.432203
DN2 B	COVID G3 vs COVID G2	-	0.618657	0.645555	0.906307	0.369971	0.729092
DN2 B	COVID G3_S vs COVID G2	-	0.618657	0.645555	0.906307	0.430217	0.759902
DN2 B	RSV G1 vs COVID G2	+	0.618657	0.645555	0.906307	0.369088	0.728421
DN2 B	RSV G2 vs COVID G2	+	0.618657	0.645555	0.906307	0.190005	0.554895
DN2 B	RSV G3 vs COVID G2	-	0.618657	0.645555	0.906307	0.374648	0.73615
DN2 B	RSV G1 vs COVID G3	+	0.618657	0.645555	0.906307	0.690476	0.919722
DN2 B	RSV G2 vs COVID G3	+	0.618657	0.645555	0.906307	0.876263	0.991691
DN2 B	RSV G3 vs COVID G3	-	0.618657	0.645555	0.906307	0.431818	0.759902
DN2 B	RSV G1 vs COVID G3_S	+	0.618657	0.645555	0.906307	0.555556	0.82963
DN2 B	RSV G2 vs COVID G3_S	+	0.618657	0.645555	0.906307	0.787879	0.96177
DN2 B	RSV G3 vs COVID G3_S	-	0.618657	0.645555	0.906307	1	1
DN2 B	RSV G2 vs RSV G1	-	0.618657	0.645555	0.906307	0.638889	0.885223
DN2 B	RSV G3 vs RSV G1	-	0.618657	0.645555	0.906307	0.530303	0.819571
DN2 B	RSV G3 vs RSV G2	-	0.618657	0.645555	0.906307	0.534965	0.819571
DN2 B	COVID G3_S vs COVID G3	+	0.618657	0.645555	0.94059	0.904762	1
DN2 B	RSV G1 vs COVID G1	+	0.618657	0.645555	0.948687	0.893463	1
DN2 B	COVID G3 vs Healthy	-	0.618657	0.645555	0.957211	0.937482	1
CD8+ TEMRA	RSV G1 vs Healthy	+	0.648501	0.662299	0.809159	0.113504	0.432203
CD8+ TEMRA	RSV G3 vs COVID G1	-	0.648501	0.662299	0.809159	0.149976	0.498161
CD8+ TEMRA	RSV G1 vs COVID G2	+	0.648501	0.662299	0.809159	0.154476	0.508862
CD8+ TEMRA	RSV G1 vs COVID G3	+	0.648501	0.662299	0.809159	0.401965	0.759902
CD8+ TEMRA	RSV G2 vs RSV G1	-	0.648501	0.662299	0.809159	0.415977	0.759902
CD8+ TEMRA	RSV G3 vs RSV G1	-	0.648501	0.662299	0.809159	0.10195	0.417014
CD8+ TEMRA	COVID G1 vs Healthy	-	0.648501	0.662299	0.836705	0.785544	0.96177
CD8+ TEMRA	COVID G3 vs Healthy	+	0.648501	0.662299	0.836705	0.748141	0.939618
CD8+ TEMRA	COVID G3_S vs Healthy	+	0.648501	0.662299	0.836705	0.681392	0.917627
CD8+ TEMRA	RSV G3 vs Healthy	-	0.648501	0.662299	0.836705	0.361088	0.719775
CD8+ TEMRA	COVID G2 vs COVID G1	-	0.648501	0.662299	0.836705	0.499032	0.808071
CD8+ TEMRA	COVID G3 vs COVID G1	+	0.648501	0.662299	0.836705	0.421663	0.759902
CD8+ TEMRA	RSV G1 vs COVID G1	+	0.648501	0.662299	0.836705	0.363636	0.719775
CD8+ TEMRA	RSV G2 vs COVID G1	+	0.648501	0.662299	0.836705	0.457392	0.773252
CD8+ TEMRA	COVID G3_S vs COVID G2	+	0.648501	0.662299	0.836705	0.584161	0.855242
CD8+ TEMRA	RSV G3 vs COVID G2	-	0.648501	0.662299	0.836705	0.286499	0.65043
CD8+ TEMRA	COVID G3_S vs COVID G3	-	0.648501	0.662299	0.836705	0.708624	0.923876
CD8+ TEMRA	RSV G3 vs COVID G3	-	0.648501	0.662299	0.836705	0.736276	0.939618
CD8+ TEMRA	RSV G1 vs COVID G3_S	+	0.648501	0.662299	0.836705	0.555556	0.82963
CD8+ TEMRA	RSV G2 vs COVID G3_S	-	0.648501	0.662299	0.836705	0.774812	0.954489
CD8+ TEMRA	RSV G3 vs COVID G3_S	-	0.648501	0.662299	0.836705	0.33347	0.691642
CD8+ TEMRA	RSV G3 vs RSV G2	-	0.648501	0.662299	0.836705	0.432994	0.760126
CD8+ TEMRA	COVID G3 vs COVID G2	+	0.648501	0.662299	0.880849	0.559667	0.833855
CD8+ TEMRA	RSV G2 vs Healthy	+	0.648501	0.662299	0.926786	0.746304	0.939618
CD8+ TEMRA	RSV G2 vs COVID G3	-	0.648501	0.662299	0.926786	0.868696	0.991691
CD8+ TEMRA	COVID G2 vs Healthy	-	0.648501	0.662299	0.953517	0.91093	1
CD8+ TEMRA	COVID G3_S vs COVID G1	+	0.648501	0.662299	0.953517	0.877203	0.991691
CD8+ TEMRA	RSV G2 vs COVID G2	+	0.648501	0.662299	0.953517	0.898677	1
HSPC	COVID G1 vs Healthy	+	0.959433	0.959433	0.995843	0.511661	0.819571
HSPC	COVID G2 vs Healthy	+	0.959433	0.959433	0.995843	1	1
HSPC	COVID G3 vs Healthy	-	0.959433	0.959433	0.995843	0.81314	0.973162
HSPC	COVID G3_S vs Healthy	+	0.959433	0.959433	0.995843	0.338072	0.696193
HSPC	RSV G1 vs Healthy	+	0.959433	0.959433	0.995843	0.428758	0.759902
HSPC	RSV G2 vs Healthy	+	0.959433	0.959433	0.995843	0.948733	1
HSPC	RSV G3 vs Healthy	+	0.959433	0.959433	0.995843	0.560345	0.833855
HSPC	COVID G2 vs COVID G1	+	0.959433	0.959433	0.995843	0.587154	0.858688
HSPC	COVID G3 vs COVID G1	-	0.959433	0.959433	0.995843	0.891534	1
HSPC	COVID G3_S vs COVID G1	-	0.959433	0.959433	0.995843	0.557131	0.831058
HSPC	RSV G1 vs COVID G1	+	0.959433	0.959433	0.995843	1	1
HSPC	RSV G2 vs COVID G1	-	0.959433	0.959433	0.995843	0.825094	0.979713
HSPC	RSV G3 vs COVID G1	+	0.959433	0.959433	0.995843	0.821101	0.979201
HSPC	COVID G3 vs COVID G2	-	0.959433	0.959433	0.995843	1	1
HSPC	COVID G3_S vs COVID G2	-	0.959433	0.959433	0.995843	0.319194	0.679867
HSPC	RSV G1 vs COVID G2	+	0.959433	0.959433	0.995843	0.63104	0.885223
HSPC	RSV G2 vs COVID G2	-	0.959433	0.959433	0.995843	0.863684	0.991691
HSPC	RSV G3 vs COVID G2	+	0.959433	0.959433	0.995843	0.573189	0.845465
HSPC	COVID G3_S vs COVID G3	+	0.959433	0.959433	0.995843	0.442771	0.763908
HSPC	RSV G1 vs COVID G3	+	0.959433	0.959433	0.995843	0.397615	0.759083
HSPC	RSV G2 vs COVID G3	+	0.959433	0.959433	0.995843	0.679395	0.917471
HSPC	RSV G3 vs COVID G3	+	0.959433	0.959433	0.995843	0.613431	0.879883
HSPC	RSV G1 vs COVID G3_S	+	0.959433	0.959433	0.995843	0.502335	0.811464
HSPC	RSV G2 vs COVID G3_S	-	0.959433	0.959433	0.995843	0.680215	0.917471
HSPC	RSV G3 vs COVID G3_S	+	0.959433	0.959433	0.995843	0.742667	0.939618
HSPC	RSV G2 vs RSV G1	-	0.959433	0.959433	0.995843	0.866273	0.991691
HSPC	RSV G3 vs RSV G1	-	0.959433	0.959433	0.995843	0.862374	0.991691
HSPC	RSV G3 vs RSV G2	+	0.959433	0.959433	0.995843	0.891467	1
